# Supplementary material for: Dysregulation of miR-1-3p: An Early Event in Colitis-Associated Dysplasia
Source: MDPI journal article supplement (doi:10.3390/ijms232113024), 2022-10-27
Supplement: s1 [file s1]

**Supplementary Table S1.** Validated miRs from the identified miR signature.

| miRNAs         | Fold Change (log2) |
|----------------|--------------------|
| <i>miR-127</i> | -0.251             |
| <i>miR-133</i> | -0.174             |
| <i>miR-143</i> | -0.728             |
| <i>miR-145</i> | -0.817             |
| <i>miR-1a</i>  | -0.701             |
| <i>miR-205</i> | 1.339              |
| <i>miR-30c</i> | -1.550             |
| <i>miR-31</i>  | 3.457              |
| <i>miR-375</i> | -2.328             |

miRs were validated by RT-qPCR using an independent set of murine samples (inflamed n=8; flat n=6; and polypoid n=8). Data are expressed as log2 fold-change. Positive and negative values indicate upregulation and downregulation of the indicated miR, respectively.
