# Supplementary material for: Dysregulation of miR-1-3p: An Early Event in Colitis-Associated Dysplasia
Source: MDPI journal article supplement (doi:10.3390/ijms232113024), 2022-10-27
Supplement: s1 [file s1]

## Dysregulation of miR-1-3p: an early event in colitis-associated dysplasia

Fragoso et al.

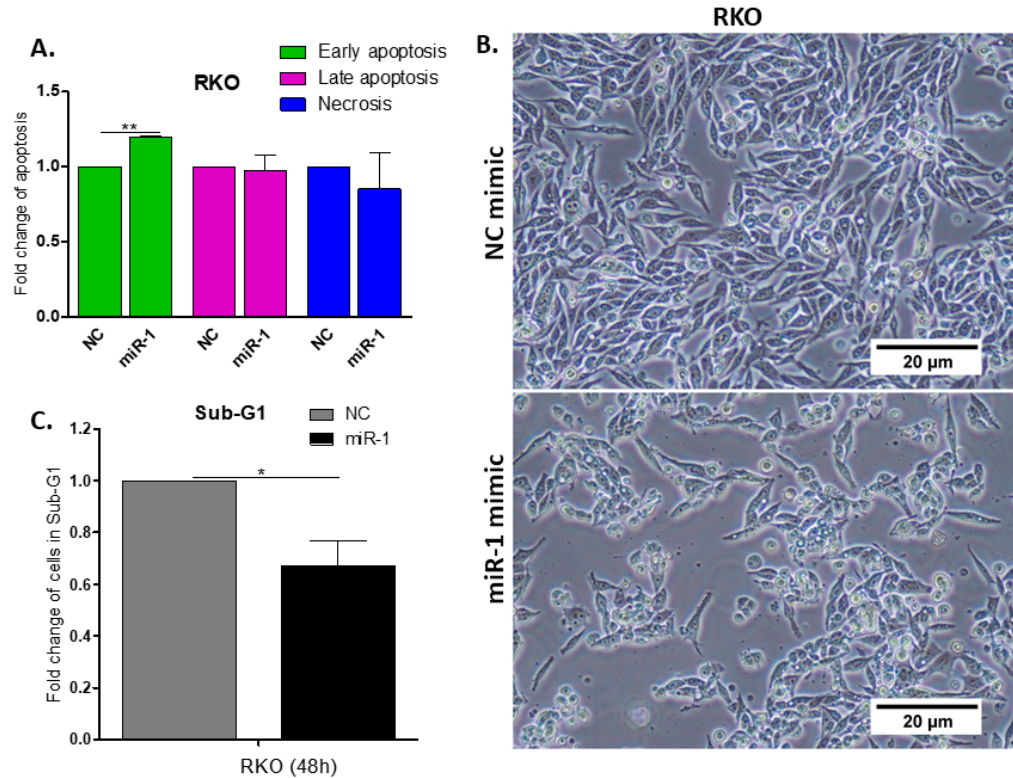

**Supplementary Figure S1.** Effect of expression of the miR-1 mimic on apoptosis in RKO cells (48h post-transfection). Fold change in apoptotic cells was calculated by normalizing the percentage of apoptotic cells detected following transfection with the miR-1 mimic, to that of cells transfected with the negative control (cel-miR-67, NC) (mean  $\pm$  SEM). Statistical comparisons were made using data from three independent experiments, expressed as log 2. *A*) Analysis of cells undergoing early apoptosis (AnnexinV+), late apoptosis (AnnexinV+/7AAD+), and necrosis (7AAD+) following transfection. *B*) Representative images (10x) of RKO cells after transfection with cel-miR-67 (top) or miR-1 mimic (bottom) for 48h, demonstrating the presence of round and floating cells. *C*) Fold change of RKO cells in sub-G1 48h after transfection with miR-1. Comparisons significantly different by one sample (or paired) t-test: \*  $P \leq 0.05$ , \*\*  $P \leq 0.01$ .
