# Supplementary material for: Dysregulation of miR-1-3p: An Early Event in Colitis-Associated Dysplasia
Source: Int J Mol Sci. 2022 Oct 27;23(21):13024. doi: 10.3390/ijms232113024 (PMC9657954; doi:10.3390/ijms232113024)
Supplement: Supplementary file 1 [file ijms-23-13024-s001.zip]

Archive with 7 entries (7 files):
- Supplementary Data S1 - Fragoso et al - NanoString_miRNA_expression_Inflamed_versus_Dysplasia_(Flat_and_Polypoid).xlsx
- Supplementary Data S2 - Fragoso et al - Supplementary Data S2 - Microarray_mRNA_expression_Inflamed_versus_Polypoid tissue.xlsx
- Supplementary Data S3 - Fragoso et al - List_of_predicted_genes_DE_miRs.xlsx
- Supplementary Data S4 - Fragoso et al - Adjacency_Matrix _between_miRs_and_targets.xlsx
- Supplementary Data S5 - Fragoso et al - Pathway_Enrichment_ Analysis_EnrichR.xlsx
- Supplementary Figure S1- Fragoso et al.pdf
- Supplementary Table S1-Fragoso et al.pdf
