# Supplementary material for: Dysregulation of miR-1-3p: An Early Event in Colitis-Associated Dysplasia
Source: Int J Mol Sci. 2022 Oct 27;23(21):13024. doi: 10.3390/ijms232113024 (PMC9657954; doi:10.3390/ijms232113024)
Supplement: Supplementary file 1 [file ijms-23-13024-s001.zip › Supplementary Data S1 - Fragoso et al - NanoString_miRNA_expression_Inflamed_versus_Dysplasia_(Flat_and_Polypoid).xlsx]

## Sheet: NanoString Data
miRNA	Accession	CodeClass	CV	logFC.P.vs.I	logFC.F.vs.I	logFC.F.vs.P	PVal.P.vs.I	PVal.F.vs.I	PVal.F.vs.P	FDR.P.vs.I	FDR.F.vs.I	FDR.F.vs.P	I1	I2	I3	I4	P1	P2	P3	P4	F1	F2	F3
mmu-let-7a	MIMAT0000521	Endogenous1	85.07	0.356384	0.639966	0.283581	0.773036	0.636103	0.742112	0.87333	0.815286	0.998042	10.1724	9.59115	3.62293	7.56537	9.95893	9.43829	6.46271	6.51743	9.08995	7.38517	8.65864
mmu-let-7b	MIMAT0000522	Endogenous1	24.44	0.041682	-0.108461	-0.150143	0.915146	0.723353	0.710897	0.943483	0.855524	0.998042	11.9175	11.9447	11.9752	11.8943	12.7024	11.8795	11.5089	11.8075	11.6196	11.9847	11.869
mmu-let-7c	MIMAT0000523	Endogenous1	36.31	-0.174021	-0.494413	-0.320392	0.695156	0.172326	0.487357	0.814613	0.479856	0.998042	12.6341	12.3939	11.8314	12.2967	13.0069	12.4057	11.5422	11.5053	11.8439	11.5005	12.0395
mmu-let-7d	MIMAT0000383	Endogenous1	26.05	-0.269098	-0.595843	-0.326745	0.478526	0.121034	0.379371	0.672074	0.446068	0.998042	12.1144	11.9476	11.4469	11.327	11.3046	11.3908	11.4562	11.6079	11.4586	10.7783	11.1024
mmu-let-7e	MIMAT0000524	Endogenous1	19.28	0.229574	-0.157307	-0.38688	0.534633	0.606907	0.302209	0.712265	0.801932	0.998042	8.56255	8.55282	8.37777	8.36269	9.1362	8.53838	8.62337	8.47618	8.4054	8.20281	8.31175
mmu-let-7f	MIMAT0000525	Endogenous1	39.37	-0.114713	-0.412332	-0.297619	0.805464	0.350172	0.542181	0.892157	0.633638	0.998042	9.93779	9.7546	8.86323	8.95568	9.92279	9.84751	8.6953	8.58684	9.51396	8.35328	9.02923
mmu-let-7g	MIMAT0000121	Endogenous1	26.53	-0.215284	-0.536075	-0.320792	0.579272	0.161321	0.412555	0.740108	0.475561	0.998042	12.343	12.4543	11.8632	11.695	12.2058	12.0357	11.525	11.728	11.9973	11.3141	11.347
mmu-let-7i	MIMAT0000122	Endogenous1	31.97	0.400868	0.318981	-0.0818874	0.334889	0.349444	0.845155	0.573498	0.633638	0.998042	10.2476	10.3076	9.9009	9.76456	11.2028	10.5573	9.94808	10.1159	10.551	10.5145	10.0569
mmu-miR-1	MIMAT0000123	Endogenous1	75.18	-1.91773	-2.06151	-0.143783	0.000176591	0.000120901	0.711085	0.0199901	0.0160984	0.998042	6.22091	5.95884	6.43029	5.73688	4.13586	3.78346	4.14078	4.61589	4.08661	3.64847	4.34056
mmu-miR-100	MIMAT0000655	Endogenous1	46.08	-1.2953	-1.01354	0.281756	0.00310602	0.00859213	0.44358	0.0758781	0.19682	0.998042	6.28577	6.46989	6.10832	5.96625	4.62176	4.88313	4.91839	5.22574	5.34944	5.23304	4.99955
mmu-miR-101a	MIMAT0000133	Endogenous1	75.36	-1.0614	-1.19324	-0.131835	0.0363773	0.0566629	0.775548	0.241714	0.314108	0.998042	3.47897	3.8846	5.47086	4.33842	3.39917	2.85	3.50335	3.17473	3.44228	3.76341	2.09424
mmu-miR-101b	MIMAT0000616	Endogenous1	30.29	-0.171816	-0.499146	-0.32733	0.671719	0.220333	0.370116	0.79595	0.535717	0.998042	5.96763	5.70293	6.91564	6.63372	6.2737	5.86691	6.16631	6.22574	5.57168	5.87061	5.97522
mmu-miR-103	MIMAT0000546	Endogenous1	36.72	-0.683024	-0.411139	0.271884	0.183633	0.281234	0.587823	0.432357	0.593385	0.998042	7.72042	8.03782	7.30095	6.87885	5.45812	7.10538	7.16621	7.47622	7.17043	7.07446	6.97522
mmu-miR-105	MIMAT0004856	Endogenous1	51.65	-1.23839	-1.28379	-0.0453988	0.00924647	0.0339621	0.936974	0.150983	0.261557	0.998042	4.10014	3.63691	4.30086	4.04876	3.13586	1.97453	3.33342	2.6893	1.44361	3.87086	2.89918
mmu-miR-106a驫miR-17	MIMAT0000385	Endogenous1	32.68	1.03667	0.660982	-0.375686	0.0109829	0.0574065	0.306309	0.152705	0.314108	0.998042	7.86536	7.72969	7.58639	7.5227	8.52509	8.895	8.80096	8.62976	8.50589	8.42957	8.07559
mmu-miR-106b	MIMAT0000386	Endogenous1	43.22	1.10018	0.623668	-0.476509	0.012307	0.0785786	0.255233	0.152705	0.361276	0.998042	6.55934	6.3512	6.69335	6.49362	7.45812	8.15269	7.83321	7.0542	7.39669	7.28244	6.765
mmu-miR-107	MIMAT0000647	Endogenous1	34.49	-0.504753	-0.147594	0.357159	0.327619	0.687775	0.498609	0.570561	0.838967	0.998042	4.53294	5.22188	5.20789	4.33842	2.98368	4.19849	4.97728	5.12267	4.80012	4.81813	4.41481
mmu-miR-10a	MIMAT0000648	Endogenous1	20.91	0.0922499	0.0194049	-0.072845	0.816883	0.954961	0.85289	0.897248	0.975646	0.998042	6.1177	5.76633	5.76049	5.27128	5.98413	5.17233	6.08831	6.04002	6.01235	5.5552	5.67751
mmu-miR-10b	MIMAT0000208	Endogenous1	55.33	-0.93815	-0.381354	0.556796	0.0716631	0.397175	0.238926	0.305196	0.681035	0.998042	4.77768	4.68145	6.20789	4.96625	4.27352	3.19849	4.58135	4.82731	4.48671	4.70708	5.13709
mmu-miR-1186	MIMAT0005836	Endogenous1	78.41	0.952438	0.885976	-0.0664612	0.0939833	0.239841	0.926985	0.32767	0.544861	0.998042	3.36317	3.44493	5.00135	4.33842	4.62176	3.851	5.69098	5.7939	3.24945	5.01748	6.50192
mmu-miR-1186b	MIMAT0015644	Endogenous1	39.66	0.0783426	-0.0676144	-0.145957	0.877247	0.903481	0.736817	0.928078	0.948028	0.998042	3.58496	2.63691	4.76022	4.57954	4.06178	3.29866	4.24031	4.27426	3.14241	4.23343	4.09255
mmu-miR-1187	MIMAT0005837	Endogenous1	52.06	-0.764355	-0.851619	-0.0872638	0.149771	0.0783808	0.869812	0.40367	0.361276	0.998042	5.53294	4.54411	5.76049	4.68594	3.39917	3.91456	4.65535	5.49697	4.39643	3.64847	4.79286
mmu-miR-1188	MIMAT0005843	Endogenous1	75.32	-1.13033	-1.18437	-0.0540413	0.0826789	0.0401278	0.927955	0.314069	0.277341	0.998042	4.30159	3.63691	5.00135	2.87971	1.81558	1.97453	3.14078	4.36737	3.24945	2.38405	2.67807
mmu-miR-1190	MIMAT0005847	Endogenous1	43.02	-1.13772	-0.444785	0.692933	0.0119137	0.239504	0.0756205	0.152705	0.544861	0.998042	3.0993	2.44361	3.62293	3.20006	1.81558	1.7137	1.91839	2.36737	2.61353	2.64847	2.67807
mmu-miR-1191	MIMAT0005849	Endogenous1	50.1	-0.496621	-0.381684	0.114937	0.326866	0.44507	0.77957	0.570561	0.713625	0.998042	3.77821	3.8846	5.10852	5.57924	3.39917	4.03474	4.24031	4.68986	3.96625	4.31107	4.34056
mmu-miR-1192	MIMAT0005850	Endogenous1	46.42	-0.6217	0.164803	0.786502	0.289919	0.724021	0.203528	0.539783	0.855524	0.998042	3.58496	3.22188	4.47119	4.68594	1.81558	3.39094	4.58135	3.6893	3.52982	4.38543	4.55213
mmu-miR-1193	MIMAT0005851	Endogenous1	25.63	-0.249781	-0.200206	0.0495746	0.531004	0.595135	0.903397	0.712199	0.797172	0.998042	4.73227	4.80684	4.88606	5.52262	4.81404	4.14568	4.97728	5.01167	4.2502	5.01748	5.09255
mmu-miR-1194	MIMAT0005852	Endogenous1	36.1	-0.362259	-0.308607	0.053652	0.43581	0.335979	0.911229	0.642366	0.627604	0.998042	4.58556	4.33771	4.30086	4.04876	3.13586	3.47897	4.14078	5.06824	3.96625	4.0635	3.9991
mmu-miR-1195	MIMAT0005856	Endogenous1	47	-1.18357	-0.960988	0.22258	0.0130193	0.021362	0.61328	0.153519	0.231755	0.998042	5.13545	4.59096	4.88606	4.33842	3.27352	2.85	3.91839	4.17473	3.76447	3.38543	4.18031
mmu-miR-1196	MIMAT0005857	Endogenous1	104.53	2.01028	1.37788	-0.632402	0.00154592	0.0979672	0.437463	0.0542239	0.403033	0.998042	6.7086	7.04636	7.97338	7.62029	8.9691	8.13263	10.1439	10.1441	7.15674	8.14006	10.8483
mmu-miR-1197	MIMAT0005858	Endogenous1	48.61	-0.507828	-0.315759	0.192069	0.284871	0.551868	0.667039	0.535742	0.778981	0.998042	4.10014	3.22188	5.20789	4.20085	3.51475	3.19849	4.03386	3.95233	3.0268	4.23343	4.34056
mmu-miR-1198	MIMAT0005859	Endogenous1	31.62	-0.338977	-0.440491	-0.101514	0.430845	0.279101	0.81045	0.641733	0.591652	0.998042	4.63575	4.80684	5.54905	5.57924	5.0237	4.03474	5.03386	5.12267	4.2502	4.76394	5.09255
mmu-miR-1199	MIMAT0005860	Endogenous1	78.13	-1.07313	-1.00234	0.070784	0.0624651	0.0838639	0.874298	0.305196	0.369388	0.998042	2.77821	3.72465	5.20789	4.04876	3.62176	1.97453	2.91839	2.95233	2.90111	2.64847	3.26303
mmu-miR-122	MIMAT0000246	Endogenous1	33.97	-0.295327	-0.365336	-0.0700089	0.535422	0.363237	0.892356	0.712265	0.650608	0.998042	4.02591	3.8846	4.47119	4.68594	4.13586	2.7137	4.42089	4.61589	3.34908	3.87086	4.48478
mmu-miR-1224	MIMAT0005460	Endogenous1	45.08	0.243771	-0.316906	-0.560677	0.618632	0.541481	0.24302	0.762844	0.778981	0.998042	7.42181	7.3918	8.98749	8.57928	9.0286	7.64854	8.14073	8.53761	7.14985	7.72144	8.46328
mmu-miR-124	MIMAT0000134	Endogenous1	36.31	-0.860343	-0.504403	0.35594	0.101503	0.152004	0.507328	0.338065	0.46255	0.998042	5.09972	4.76607	4.47119	5.04876	2.62059	3.851	4.58135	4.89142	4.61235	4.23343	4.18031
mmu-miR-125a-3p	MIMAT0004528	Endogenous1	37.2	-0.386282	-0.237778	0.148504	0.40038	0.611042	0.685472	0.627743	0.804301	0.998042	4.53294	3.09592	5.00135	4.20085	4.06178	3.47897	3.79286	3.95233	3.96625	3.76341	4.18031
mmu-miR-125a-5p	MIMAT0000135	Endogenous1	21.06	0.40504	0.24698	-0.15806	0.298332	0.455858	0.670487	0.548233	0.720419	0.998042	7.19574	7.37165	7.74389	7.82139	8.26959	7.50494	8.09492	7.88338	7.68566	7.88978	7.765
mmu-miR-125b-3p	MIMAT0004669	Endogenous1	41.12	0.0628035	-0.283783	-0.346587	0.890485	0.460763	0.465878	0.933669	0.720419	0.998042	3.0993	3.33771	4.10852	3.68594	2.98368	3.09085	4.58135	3.8268	3.69042	3.23266	2.89918
mmu-miR-125b-5p	MIMAT0000136	Endogenous1	45.82	-1.44211	-0.711348	0.730762	0.00139649	0.0480648	0.061043	0.0542239	0.297074	0.998042	10.0505	10.4523	10.6319	10.2819	9.10659	8.61276	8.99515	8.93372	9.86245	9.57894	9.48706
mmu-miR-126-3p	MIMAT0000138	Endogenous1	30.4	-0.230509	-0.300558	-0.0700481	0.598626	0.409279	0.87133	0.754309	0.693265	0.998042	9.18943	9.02281	8.41992	8.34647	9.16962	8.84853	8.32206	7.71637	8.68566	8.39416	8.25248
mmu-miR-126-5p	MIMAT0000137	Endogenous1	29.37	-0.505239	-0.479408	0.0258306	0.268728	0.144871	0.956704	0.513851	0.460608	0.998042	6.51932	6.46989	6.43029	6.30506	6.30615	6.71315	5.85699	4.82731	5.99707	6.15076	5.70736
mmu-miR-127	MIMAT0000139	Endogenous1	80.05	-1.90877	-1.50571	0.403053	0.000711511	0.00402431	0.325507	0.0402715	0.178391	0.998042	4.82222	4.16027	5.10852	5.73688	3.51475	2.39232	3.33342	2.95233	3.44228	3.64847	3.26303
mmu-miR-1274a	MIMAT0009445	Endogenous1	64.53	1.85344	1.76868	-0.0847558	0.000252753	0.00242609	0.86081	0.0235557	0.152574	0.998042	6.86542	7.0207	6.69335	7.21868	9.23213	8.98735	8.72996	8.26247	8.8937	9.53898	7.72199
mmu-miR-128	MIMAT0000140	Endogenous1	40.26	-0.638064	-0.340591	0.297473	0.179912	0.435407	0.529264	0.429771	0.711726	0.998042	4.98732	3.80735	3.88557	4.57954	2.81352	3.47897	4.14078	4.27426	3.34908	4.23343	4.34056
mmu-miR-129-3p	MIMAT0000544	Endogenous1	49.36	-1.08635	-1.04277	0.0435862	0.0183354	0.0135292	0.912163	0.181808	0.200961	0.998042	4.63575	4.44427	5.10852	4.04876	3.51475	3.39094	2.91839	4.06781	3.34908	3.64847	3.55213
mmu-miR-129-5p	MIMAT0000209	Endogenous1	83.88	-1.40177	-1.34829	0.0534849	0.0306558	0.0306504	0.920737	0.228305	0.257729	0.998042	3.86493	2.80735	4.47119	5.20085	1.81558	2.19849	2.65535	4.06781	2.25096	2.86987	3.09255
mmu-miR-1306	MIMAT0009411	Endogenous1	62.76	-0.925745	-0.349021	0.576724	0.133252	0.48462	0.328095	0.379132	0.741338	0.998042	3.36317	3.09592	5.00135	3.68594	1.40054	2.56071	3.65535	3.8268	3.34908	3.0635	3.90014
mmu-miR-130a	MIMAT0000141	Endogenous1	26.15	-0.464701	-0.369531	0.0951703	0.227845	0.31837	0.800635	0.478536	0.612917	0.998042	7.32481	7.08821	7.7767	7.02857	7.0237	6.99107	6.67327	6.67143	7.05723	7.26294	6.48494
mmu-miR-130b	MIMAT0000387	Endogenous1	27.96	-0.0923135	-0.422049	-0.329735	0.823387	0.196135	0.441934	0.897952	0.504602	0.998042	6.51932	6.12887	6.5489	6.49362	5.56925	6.13258	6.6372	6.98242	5.86864	6.06329	6.06996
mmu-miR-132	MIMAT0000144	Endogenous1	40.31	1.24377	0.512353	-0.731418	0.00422839	0.164935	0.0641552	0.0957307	0.479856	0.998042	7.08172	7.3918	7.72724	7.02857	8.71514	8.56609	8.43141	8.49177	7.89373	8.12397	7.44137
mmu-miR-133a	MIMAT0000145	Endogenous1	66.7	-1.82169	-1.85812	-0.0364241	0.00119428	0.000142212	0.940487	0.0542239	0.0160984	0.998042	5.39266	5.72438	5.47086	5.46369	3.27352	2.7137	4.24031	4.5373	3.44228	3.96993	3.55213
mmu-miR-133b	MIMAT0000769	Endogenous1	50.47	-1.3121	-0.995543	0.316557	0.00595021	0.0149022	0.429457	0.120279	0.200961	0.998042	3.68482	3.22188	4.10852	4.04876	1.81558	2.39232	2.65535	2.95233	2.76341	2.86987	2.67807
mmu-miR-134	MIMAT0000146	Endogenous1	52.45	-0.781338	-0.552524	0.228814	0.167536	0.310317	0.702678	0.417733	0.605653	0.998042	2.77821	3.80735	3.30159	4.46401	2.81352	1.38957	3.65535	3.36737	3.24945	2.0635	3.79286
mmu-miR-135a	MIMAT0000147	Endogenous1	30.96	-0.272171	-0.239543	0.0326276	0.546137	0.51025	0.941349	0.716051	0.764026	0.998042	5.13545	4.54411	5.62293	4.96625	4.81404	3.851	5.50335	5.01167	4.83491	4.64847	4.99955
mmu-miR-135b	MIMAT0000612	Endogenous1	45.23	0.79934	0.178603	-0.620737	0.109073	0.697409	0.139265	0.344889	0.843285	0.998042	2.58496	3.09592	4.47119	3.20006	3.51475	4.03474	4.72574	4.27426	3.61235	3.38543	3.55213
mmu-miR-136	MIMAT0000148	Endogenous1	40.96	-0.224656	0.0146219	0.239278	0.639319	0.976248	0.566583	0.771372	0.98941	0.998042	5.23726	5.39197	6.51049	6.94498	5.39917	5.41346	6.33342	6.04002	5.57168	6.42072	6.11499
mmu-miR-137	MIMAT0000149	Endogenous1	37.93	-0.344538	-0.00477053	0.339767	0.464638	0.990389	0.483499	0.66243	0.99053	0.998042	3.23726	2.95977	4.10852	3.46336	2.98368	2.19849	3.14078	4.06781	3.0268	3.38543	3.90014
mmu-miR-138	MIMAT0000150	Endogenous1	43.36	-0.502782	-0.464586	0.0381963	0.29227	0.296172	0.928296	0.541903	0.593385	0.998042	4.42156	3.33771	5.00135	4.04876	3.51475	3.09085	4.50335	3.6893	3.44228	3.87086	3.90014
mmu-miR-139-3p	MIMAT0004662	Endogenous1	41.47	-0.957672	-0.813335	0.144337	0.0259973	0.0630899	0.734255	0.207246	0.331098	0.998042	4.82222	4.44427	5.30086	4.87873	3.72137	3.47897	4.14078	4.27426	4.14323	3.38543	4.61589
mmu-miR-139-5p	MIMAT0000656	Endogenous1	57.01	-1.54738	-1.28671	0.260673	0.00706225	0.00731706	0.642857	0.133241	0.19682	0.998042	5.53294	5.41819	5.94486	5.20085	2.62059	4.03474	4.24031	5.01167	4.39643	4.76394	3.55213
mmu-miR-140	MIMAT0000151	Endogenous1	32.21	0.00065515	0.385153	0.384498	0.998734	0.341669	0.383059	0.998734	0.629918	0.998042	4.23726	4.49506	5.20789	4.68594	5.27389	4.56133	4.72574	4.06781	5.32517	5.38509	4.41481
mmu-miR-141	MIMAT0000153	Endogenous1	37.17	0.834878	0.551286	-0.283593	0.0541114	0.129555	0.477128	0.303238	0.446068	0.998042	7.85474	7.64256	8.43024	8.27118	9.52337	8.91277	8.64169	8.46041	8.48688	8.80135	8.51467
mmu-miR-142-3p	MIMAT0000155	Endogenous1	44.73	-1.13168	-0.977351	0.154328	0.0128652	0.0660671	0.771776	0.153519	0.341974	0.998042	8.95286	8.96339	8.61386	8.57928	8.18933	7.91862	7.55252	6.9222	8.61743	8.1822	6.60036
mmu-miR-142-5p	MIMAT0000154	Endogenous1	63.75	-0.389956	-0.294409	0.0955476	0.47146	0.620563	0.807768	0.667895	0.806376	0.998042	4.82222	5.49506	7.47094	6.37069	5.42895	5.32193	5.72574	6.12247	5.32517	6.06329	5.8475
mmu-miR-143	MIMAT0000247	Endogenous1	81.52	-2.45391	-2.11868	0.335232	1.46781e-05	4.53727e-05	0.403165	0.00238001	0.0128405	0.998042	10.748	10.951	10.7209	10.8475	8.33392	8.98174	8.06808	8.06808	8.99709	8.44261	8.65485
mmu-miR-144	MIMAT0000156	Endogenous1	39.53	-0.0765247	-0.617594	-0.54107	0.864425	0.202527	0.15826	0.922652	0.511742	0.998042	3.36317	3.95884	4.88606	5.04876	4.45812	4.39094	4.03386	4.06781	3.44228	3.64847	3.9991
mmu-miR-145	MIMAT0000157	Endogenous1	102.31	-3.35531	-2.76104	0.594277	3.18071e-07	6.75365e-06	0.136398	9.00141e-05	0.00382257	0.998042	11.7179	11.733	11.308	11.6287	8.1317	8.52301	7.87252	8.43912	8.75539	8.55109	9.20112
mmu-miR-146a	MIMAT0000158	Endogenous1	41.8	-0.351302	0.684241	1.03554	0.410459	0.120145	0.0204894	0.634754	0.446068	0.998042	9.12221	8.9901	8.00141	8.10769	8.33784	8.66494	7.96999	7.84342	9.50184	9.42738	8.78957
mmu-miR-146b	MIMAT0003475	Endogenous1	27.82	-0.700366	-0.474478	0.225888	0.0788441	0.175409	0.566177	0.314069	0.479856	0.998042	5.23726	5.33735	5.62293	5.52262	4.33771	5.17233	4.58135	4.82731	4.90207	5.34873	4.61589
mmu-miR-147	MIMAT0004857	Endogenous1	53.34	-0.617023	-0.227331	0.389692	0.282658	0.65626	0.463696	0.535064	0.823556	0.998042	2.58496	2.22342	4.10852	3.68594	2.40054	1.38957	2.65535	3.6893	2.44361	3.0635	3.26303
mmu-miR-148a	MIMAT0000516	Endogenous1	44.95	-1.1881	-0.454615	0.733488	0.00933638	0.253541	0.0810715	0.150983	0.560563	0.998042	9.61554	9.58971	10.4734	10.2946	8.38414	9.21454	8.84511	8.77706	9.77676	9.77233	9.067
mmu-miR-148b	MIMAT0000580	Endogenous1	18.03	-0.159395	-0.074993	0.084402	0.665189	0.828733	0.820468	0.79096	0.907593	0.998042	5.13545	5.44427	5.69321	5.12681	4.98413	5.32193	5.33342	5.12267	5.65191	5.27277	4.90014
mmu-miR-149	MIMAT0000159	Endogenous1	41.76	0.756043	0.541557	-0.214486	0.0763693	0.19771	0.642067	0.310971	0.506352	0.998042	4.16993	4.59096	4.76022	4.33842	5.09972	4.56133	5.46271	5.75995	4.86888	4.38543	5.765
mmu-miR-150	MIMAT0000160	Endogenous1	108.87	-3.89012	-2.53828	1.35184	8.00967e-08	7.3838e-05	0.00520354	4.53347e-05	0.0139308	0.998042	9.99829	9.89081	9.3778	9.15962	5.42895	5.65793	5.88801	5.89118	7.68566	7.01748	6.50192
mmu-miR-151-3p	MIMAT0000161	Endogenous1	32.68	-0.652711	-0.165512	0.487198	0.125411	0.660591	0.211537	0.371638	0.823556	0.998042	4.30159	3.8846	4.62293	3.46336	3.81455	2.97636	3.50335	3.36737	3.96625	4.0635	3.67807
mmu-miR-151-5p	MIMAT0004536	Endogenous1	28.76	-0.528992	-0.0926684	0.436323	0.187214	0.798544	0.22664	0.434274	0.895797	0.998042	7.53947	7.05485	6.6585	6.46385	6.24051	6.48913	6.50335	6.36772	6.92636	6.81813	6.765
mmu-miR-152	MIMAT0000162	Endogenous1	28.65	-0.717638	-0.516069	0.201569	0.0653587	0.175205	0.618616	0.305196	0.479856	0.998042	7.19574	7.51964	7.38845	7.27118	6.62161	6.85873	6.26416	6.75995	7.28799	6.99401	6.20105
mmu-miR-153	MIMAT0000163	Endogenous1	50.53	-0.477571	-0.56801	-0.0904387	0.353705	0.287152	0.867807	0.589994	0.593385	0.998042	0.773996	1.63691	1.29866	2.46467	0	0.978196	1.33342	1.95233	1.76553	1.0635	0.0976108
mmu-miR-154	MIMAT0000164	Endogenous1	29.1	-0.487125	-0.420752	0.0663734	0.226583	0.262254	0.856402	0.478531	0.571351	0.998042	7.05409	6.93156	7.80877	7.71177	6.78005	6.58105	7.04756	7.14904	6.88545	7.20281	6.77913
mmu-miR-155	MIMAT0000165	Endogenous1	37	-0.369392	-0.493193	-0.123801	0.385656	0.245053	0.727586	0.620117	0.547259	0.998042	0	0	1.29866	0.879706	0	0	0.333424	0.367371	0	0.0565835	0.0976108
mmu-miR-15a	MIMAT0000526	Endogenous1	16.52	0.292463	0.200708	-0.0917554	0.420188	0.555607	0.804232	0.637606	0.778981	0.998042	7.47832	7.06318	7.38845	7.20075	7.58248	7.69495	7.60014	7.42299	7.73715	7.67793	7.03507
mmu-miR-15b	MIMAT0000124	Endogenous1	36.63	-0.706953	-0.22872	0.478233	0.184096	0.562624	0.388654	0.432357	0.778981	0.998042	8.53947	8.42811	7.71039	7.64703	5.88044	8.05648	7.92582	7.63445	8.23692	7.95198	7.36868
mmu-miR-16	MIMAT0000527	Endogenous1	27.58	-0.303834	-0.322064	-0.0182304	0.446813	0.40873	0.959884	0.651794	0.693265	0.998042	10.7292	10.8736	9.95919	9.88728	9.85593	10.2445	10.131	10.0025	10.3546	9.82645	9.93965
mmu-miR-181a	MIMAT0000210	Endogenous1	23.87	-0.718247	-0.333389	0.384858	0.0629474	0.291892	0.290624	0.305196	0.593385	0.998042	8.88121	8.80687	8.9009	8.55834	8.33784	7.97613	7.86474	8.09561	8.42261	8.55509	8.38262
mmu-miR-181b驫miR-181d	MIMAT0000673	Endogenous1	39.52	-0.769944	-0.601056	0.168888	0.138108	0.105867	0.743635	0.3889	0.416117	0.998042	5.86542	4.99458	5.54905	5.12681	3.27352	4.74846	4.85699	5.57713	4.80012	4.64847	4.90014
mmu-miR-181c	MIMAT0000674	Endogenous1	54.74	-0.563957	-0.284215	0.279741	0.254488	0.576111	0.455303	0.506012	0.788027	0.998042	3.47897	3.95884	5.62293	4.68594	3.51475	3.78346	4.24031	3.95233	3.96625	4.15056	4.34056
mmu-miR-182	MIMAT0000211	Endogenous1	39.64	0.483155	0.84818	0.365024	0.324053	0.0244081	0.47144	0.570561	0.246223	0.998042	3.86493	4.59096	4.30086	4.04876	3.39917	4.63923	5.28762	5.4121	5.08619	4.96993	5.09255
mmu-miR-183	MIMAT0000212	Endogenous1	38.07	0.842644	0.98872	0.146075	0.0478103	0.0126971	0.718885	0.278976	0.200961	0.998042	4.53294	4.68145	5.10852	4.68594	5.42895	5.8505	6.08831	5.01167	5.70929	6.06329	5.45022
mmu-miR-1839-3p	MIMAT0009457	Endogenous1	57.23	-0.197209	0.123292	0.320502	0.744539	0.836534	0.518437	0.845079	0.907811	0.998042	3.68482	3.22188	5.82451	4.87873	3.98459	3.09085	4.79286	4.9528	4.19771	4.58676	4.79286
mmu-miR-1839-5p	MIMAT0009456	Endogenous1	21.6	-0.050142	-0.220738	-0.170596	0.89418	0.55302	0.662523	0.933669	0.778981	0.998042	6.23726	5.88484	6.62293	6.49362	6.30615	5.89893	6.42089	6.4121	5.76447	5.87061	6.63169
mmu-miR-184	MIMAT0000213	Endogenous1	36.3	-0.605114	-0.808753	-0.20364	0.162434	0.0351207	0.6276	0.409897	0.261557	0.998042	4.82222	4.72465	5.00135	4.20085	3.62176	3.63923	4.24031	4.82731	4.08661	3.87086	3.67807
mmu-miR-185	MIMAT0000214	Endogenous1	30.91	0.20679	0.470608	0.263817	0.636219	0.293524	0.523145	0.771372	0.593385	0.998042	5.86542	6.26622	4.76022	5.68622	5.98413	6.19849	5.24031	5.98231	6.14303	6.55505	5.64731
mmu-miR-186	MIMAT0000215	Endogenous1	82	-1.70462	-1.61429	0.0903277	0.0115221	0.0167707	0.887656	0.152705	0.210938	0.998042	3.0993	2.44361	4.30086	4.04876	2.98368	0.389567	2.33342	1.36737	1.02857	2.86987	1.67807
mmu-miR-187	MIMAT0000216	Endogenous1	43.02	-0.224378	0.170362	0.39474	0.672198	0.735994	0.404162	0.79595	0.860687	0.998042	2.77821	3.44493	4.62293	4.57954	3.62176	2.7137	3.65535	4.5373	3.90207	3.76341	4.41481
mmu-miR-188-3p	MIMAT0004541	Endogenous1	61.74	-0.0995012	-0.405399	-0.305898	0.866759	0.550631	0.6142	0.922652	0.778981	0.998042	2.10098	2.63691	4.47119	3.87873	2.62059	2.19849	3.91839	3.95233	2.44361	2.0635	4.09255
mmu-miR-188-5p	MIMAT0000217	Endogenous1	23.77	-0.374441	-0.377519	-0.00307784	0.331732	0.299322	0.993549	0.573108	0.594443	0.998042	7.53278	7.50112	8.01525	8.12681	7.44361	7.03507	7.68208	7.51743	7.00473	7.5227	7.72199
mmu-miR-1892	MIMAT0007871	Endogenous1	115.06	0.350464	-1.49507	-1.84553	0.722235	0.148112	0.0891384	0.829179	0.460608	0.998042	4.73227	2.95977	1.29866	0.879706	1.81558	0.389567	4.79286	4.27426	2.76341	0.0565835	0.0976108
mmu-miR-1893	MIMAT0007879	Endogenous1	59.59	-1.66201	-0.933318	0.728697	0.0174588	0.041573	0.279504	0.176459	0.277341	0.998042	3.94767	3.09592	4.47119	4.33842	2.1375	0.389567	3.14078	3.5373	2.76341	3.0635	3.26303
mmu-miR-1894-3p	MIMAT0007878	Endogenous1	49.21	-0.661786	-0.293907	0.36788	0.210436	0.559526	0.435978	0.462017	0.778981	0.998042	2.36177	2.95977	4.10852	4.04876	2.98368	2.39232	1.91839	3.5373	3.0268	2.64847	3.55213
mmu-miR-1894-5p	MIMAT0007877	Endogenous1	53.33	-0.994265	-1.00121	-0.00694897	0.0937579	0.0437848	0.990734	0.32767	0.284853	0.998042	4.36317	4.54411	4.88606	3.46336	1.81558	3.09085	3.91839	4.45483	3.61235	2.64847	3.67807
mmu-miR-1895	MIMAT0007867	Endogenous1	64.45	-1.34972	-0.221559	1.12816	0.0567688	0.675051	0.107461	0.305196	0.828805	0.998042	3.0993	2.95977	4.76022	4.46401	0.815575	2.56071	2.33342	4.17473	3.0268	3.87086	3.90014
mmu-miR-1896	MIMAT0007873	Endogenous1	37.89	-0.105758	0.229819	0.335577	0.809464	0.583784	0.51003	0.893093	0.79333	0.998042	3.47897	3.44493	4.10852	3.68594	3.27352	2.7137	4.03386	4.27426	3.14241	3.96993	4.61589
mmu-miR-1897-3p	MIMAT0007865	Endogenous1	47.25	-0.55072	-0.426712	0.124008	0.263506	0.436341	0.794833	0.507293	0.711726	0.998042	2.9486	3.63691	4.76022	4.46401	3.27352	2.7137	3.79286	3.8268	2.61353	4.0635	3.90014
mmu-miR-1898	MIMAT0007875	Endogenous1	21.73	-0.237864	0.0999925	0.337856	0.556056	0.747044	0.42357	0.722368	0.862912	0.998042	2.36177	2.22342	2.30159	2.46467	1.40054	2.7137	1.91839	2.36737	2.25096	2.64847	2.41414
mmu-miR-1899	MIMAT0007869	Endogenous1	71.19	-0.231668	-0.121942	0.109726	0.739139	0.86539	0.84405	0.843143	0.922431	0.998042	1.36177	1.95977	4.47119	3.68594	1.81558	1.7137	3.65535	3.36737	2.44361	3.38543	2.41414
mmu-miR-18a	MIMAT0000528	Endogenous1	45.1	0.0307059	-0.208464	-0.23917	0.948459	0.648026	0.631351	0.967258	0.820782	0.998042	2.77821	2.22342	3.62293	3.20006	2.40054	2.56071	4.03386	2.95233	2.76341	3.38543	2.09424
mmu-miR-18b	MIMAT0004858	Endogenous1	67.4	-0.744811	-0.796695	-0.0518837	0.161443	0.175956	0.90693	0.409897	0.479856	0.998042	3.23726	2.22342	4.62293	3.46336	2.98368	2.97636	1.91839	2.6893	2.44361	2.0635	3.26303
mmu-miR-190	MIMAT0000220	Endogenous1	44.92	-0.747329	-0.668871	0.0784577	0.214798	0.0780617	0.901367	0.464181	0.361276	0.998042	4.77768	3.95884	4.30086	4.68594	3.27352	1.97453	4.72574	4.76022	3.76447	3.52231	3.9991
mmu-miR-1900	MIMAT0007870	Endogenous1	50.05	-0.900336	-1.01016	-0.109824	0.102136	0.0211586	0.844708	0.338065	0.231755	0.998042	5.55919	5.12887	5.82451	4.87873	3.27352	3.851	5.08831	5.57713	4.2502	3.96993	4.79286
mmu-miR-1901	MIMAT0007880	Endogenous1	55.49	-0.252963	0.378825	0.631788	0.707664	0.442927	0.379886	0.820774	0.713625	0.998042	2.10098	3.09592	3.88557	2.46467	0.815575	1.97453	3.79286	3.95233	3.0268	3.87086	2.89918
mmu-miR-1902	MIMAT0007863	Endogenous1	32.71	-0.754069	-0.421651	0.332418	0.0650518	0.26998	0.420408	0.305196	0.581021	0.998042	5.26978	5.16068	4.76022	4.68594	4.39917	4.60051	4.03386	3.8268	4.44228	5.10769	4.09255
mmu-miR-1903	MIMAT0007868	Endogenous1	50.51	-0.887941	-0.876741	0.0111995	0.116802	0.0365921	0.984489	0.356234	0.265527	0.998042	5.20438	4.16027	4.76022	4.57954	2.81352	2.85	4.42089	5.06824	4.19771	3.52231	3.67807
mmu-miR-1904	MIMAT0007874	Endogenous1	47.62	-0.724672	-0.703601	0.0210709	0.144251	0.0927122	0.965005	0.400226	0.400573	0.998042	4.16993	3.8846	4.10852	5.04876	2.81352	3.09085	3.79286	4.61589	3.24945	3.64847	3.90014
mmu-miR-1905	MIMAT0007866	Endogenous1	53.46	-0.806712	-0.725237	0.0814745	0.114851	0.15769	0.847121	0.355223	0.472236	0.998042	3.86493	3.09592	4.88606	4.78555	3.51475	2.56071	3.79286	3.5373	3.44228	3.0635	3.79286
mmu-miR-1906	MIMAT0007872	Endogenous1	35.41	-0.209297	0.00775234	0.217049	0.655345	0.983531	0.650324	0.782543	0.99053	0.998042	2.77821	3.22188	3.88557	3.20006	2.40054	2.39232	3.50335	3.95233	2.90111	3.52231	3.41414
mmu-miR-1907	MIMAT0007876	Endogenous1	36.93	-0.382293	-0.207402	0.174891	0.422458	0.624634	0.692742	0.637606	0.809023	0.998042	3.0993	2.95977	3.88557	4.33842	3.51475	2.19849	3.50335	3.5373	3.34908	3.64847	3.09255
mmu-miR-190b	MIMAT0004852	Endogenous1	26.65	-0.380732	-0.396677	-0.0159451	0.335385	0.293228	0.966604	0.573498	0.593385	0.998042	7.45738	7.48872	8.0954	8.22757	7.41422	7.04221	7.60014	7.68958	7.04985	7.44692	7.765
mmu-miR-191	MIMAT0000221	Endogenous1	32.35	-0.549462	-0.00695187	0.54251	0.301819	0.983621	0.340976	0.552847	0.99053	0.998042	7.59171	7.88013	7.40948	7.12681	5.39917	6.99107	7.55252	7.86753	7.61743	7.21296	7.65485
mmu-miR-192	MIMAT0000517	Endogenous1	51.14	-1.19442	-0.654189	0.540231	0.0142836	0.12557	0.224206	0.16169	0.446068	0.998042	8.02586	8.73498	7.62293	7.66021	6.54226	7.39678	6.1914	7.13586	7.5614	7.64818	6.86084
mmu-miR-1927	MIMAT0009390	Endogenous1	54.92	-1.27997	-0.597715	0.682251	0.0336881	0.184635	0.248949	0.238343	0.48565	0.998042	3.0993	3.44493	4.47119	4.04876	1.40054	1.7137	3.14078	3.6893	2.76341	3.0635	3.67807
mmu-miR-1928	MIMAT0009391	Endogenous1	33.22	-0.69616	-0.547663	0.148497	0.127776	0.115881	0.741398	0.372789	0.446068	0.998042	5.53294	5.06307	5.62293	5.12681	3.90207	4.14568	5.28762	5.22574	4.65191	4.76394	4.95047
mmu-miR-1929	MIMAT0009392	Endogenous1	44.14	-0.346597	-0.545768	-0.19917	0.510078	0.255613	0.68665	0.697814	0.562449	0.998042	5.4219	4.59096	6.25512	6.1643	5.20672	4.0917	5.82528	5.9222	4.65191	5.23304	5.30195
mmu-miR-193	MIMAT0000223	Endogenous1	48.01	-1.37524	-0.85308	0.52216	0.002251	0.0317044	0.186514	0.0637034	0.257729	0.998042	5.732	5.7866	6.30104	5.68622	4.13586	4.67638	4.65535	4.5373	5.14282	4.58676	5.34056
mmu-miR-1930	MIMAT0009393	Endogenous1	54.25	-0.80702	-0.238805	0.568215	0.191599	0.586185	0.36125	0.440325	0.79333	0.998042	3.0993	3.09592	4.47119	4.04876	1.40054	2.97636	2.65535	4.45483	3.14241	3.76341	3.41414
mmu-miR-1931	MIMAT0009394	Endogenous1	79.99	-0.926142	-1.05886	-0.132717	0.111852	0.0740774	0.766194	0.349769	0.361276	0.998042	3.36317	3.09592	5.38853	4.46401	2.81352	2.39232	4.03386	3.36737	2.90111	3.0635	3.09255
mmu-miR-1932	MIMAT0009395	Endogenous1	47.97	-0.628845	-1.14744	-0.518597	0.19453	0.0276499	0.343981	0.443967	0.248781	0.998042	2.36177	2.63691	3.30159	3.20006	1.40054	1.7137	2.91839	2.95233	1.44361	2.64847	1.09085
mmu-miR-1933-3p	MIMAT0009397	Endogenous1	53.92	-0.369068	-0.314281	0.0547865	0.556046	0.497204	0.931109	0.722368	0.750446	0.998042	2.58496	2.44361	4.10852	3.20006	2.40054	0.978196	3.65535	3.8268	3.0268	2.38405	2.89918
mmu-miR-1933-5p	MIMAT0009396	Endogenous1	40.64	-0.0209252	-0.0737364	-0.0528112	0.96621	0.887756	0.892876	0.978309	0.941737	0.998042	4.63575	4.63691	6.20789	6.37069	5.67214	4.91456	5.42089	5.75995	4.99729	5.52262	5.64731
mmu-miR-1934	MIMAT0009398	Endogenous1	43.06	-0.549814	-0.0946955	0.455119	0.316168	0.830624	0.400119	0.561678	0.907593	0.998042	3.58496	2.63691	3.62293	4.33842	1.81558	2.56071	3.91839	3.6893	3.0268	3.64847	3.67807
mmu-miR-1935	MIMAT0009399	Endogenous1	33.94	-0.305677	-0.480348	-0.174672	0.463915	0.266591	0.638361	0.66243	0.578124	0.998042	7.66669	7.72969	8.71036	8.82722	8.03342	7.66263	8.04761	7.96757	7.37912	7.80471	8.07559
mmu-miR-1936	MIMAT0009400	Endogenous1	64.29	-0.453911	-0.488293	-0.0343821	0.474371	0.452644	0.947007	0.667895	0.719654	0.998042	1.77821	2.22342	4.10852	4.20085	3.27352	2.7137	1.33342	3.17473	3.0268	2.0635	2.67807
mmu-miR-1937a驫miR-1937b	MIMAT0009401	Endogenous1	37.48	-0.0135471	-0.314341	-0.300794	0.975402	0.488168	0.424021	0.985853	0.744752	0.998042	13.6321	13.8238	14.5066	15.2649	14.4673	14.0394	14.5518	14.1147	13.6875	14.0287	14.2613
mmu-miR-1937c	MIMAT0009429	Endogenous1	32.29	0.221869	0.0268519	-0.195018	0.614003	0.947562	0.625699	0.76045	0.972886	0.998042	12.5179	12.5513	13.2548	13.8129	12.8215	12.9396	13.8286	13.4348	12.7914	13.197	13.1949
mmu-miR-1938	MIMAT0009402	Endogenous1	46.52	-1.26259	-0.340885	0.921701	0.0228339	0.378442	0.0892355	0.202452	0.669369	0.998042	4.36317	4.09677	4.76022	5.27128	3.72137	1.97453	3.79286	3.95233	4.14323	4.15056	4.55213
mmu-miR-1939	MIMAT0009403	Endogenous1	20.35	0.0395637	0.179783	0.140219	0.920243	0.618537	0.712897	0.946766	0.806376	0.998042	4.86542	4.28096	5.10852	5.20085	4.39917	5.00585	5.03386	5.17513	5.02724	5.31107	4.79286
mmu-miR-193b	MIMAT0004859	Endogenous1	27.63	-0.448139	-0.409032	0.0391075	0.266273	0.269914	0.91811	0.510883	0.581021	0.998042	7.87067	8.28799	8.53939	8.83305	7.79727	7.5256	8.14715	8.26852	7.6761	8.02326	8.22188
mmu-miR-194	MIMAT0000224	Endogenous1	52.42	-1.16678	-0.861515	0.305267	0.0195151	0.0522031	0.485711	0.184092	0.305886	0.998042	10.0598	10.2406	9.07577	9.32179	7.78005	9.19044	8.28757	8.77281	9.03494	8.96714	8.43688
mmu-miR-1940	MIMAT0009404	Endogenous1	40.06	-0.880467	-0.721714	0.158753	0.0815536	0.0549444	0.755903	0.314069	0.311709	0.998042	5.82222	5.28096	5.47086	5.20085	3.51475	4.0917	5.1914	5.45516	4.48671	4.58676	5.09255
mmu-miR-1941-3p	MIMAT0009406	Endogenous1	43.95	-0.710039	-1.11152	-0.401482	0.117406	0.00737296	0.385441	0.356234	0.19682	0.998042	4.42156	4.22188	3.88557	4.46401	3.13586	2.97636	3.50335	4.5373	2.76341	3.23266	3.41414
mmu-miR-1941-5p	MIMAT0009405	Endogenous1	60.25	-1.56409	-1.66765	-0.103552	0.0687743	0.000662743	0.908992	0.305196	0.0535875	0.998042	5.20438	4.63691	4.30086	4.68594	0	3.78346	4.33342	4.45483	3.34908	2.86987	2.89918
mmu-miR-1942	MIMAT0009407	Endogenous1	42.35	-0.473457	-0.565015	-0.0915583	0.325665	0.14416	0.855057	0.570561	0.460608	0.998042	5.70874	4.9222	5.54905	5.68622	4.27352	4.43563	5.08831	6.17493	5.02724	4.45549	5.22188
mmu-miR-1943	MIMAT0009408	Endogenous1	37.98	-0.594401	-0.330974	0.263427	0.213555	0.444128	0.597712	0.464181	0.713625	0.998042	4.42156	3.72465	4.76022	4.78555	2.81352	3.7126	4.33342	4.45483	3.61235	3.87086	4.79286
mmu-miR-1944	MIMAT0009409	Endogenous1	31.17	-0.243798	0.0776043	0.321403	0.586709	0.823261	0.492839	0.742919	0.906548	0.998042	12.9721	12.984	12.5945	12.302	11.6079	12.2015	12.7032	13.3647	12.5133	12.7363	13.1226
mmu-miR-1945	MIMAT0009410	Endogenous1	51.13	-0.743935	-0.712825	0.0311097	0.136374	0.201216	0.954254	0.385938	0.51071	0.998042	3.94767	3.44493	5.00135	4.33842	2.81352	2.85	4.14078	3.95233	3.76447	2.38405	4.26228
mmu-miR-1946a	MIMAT0009412	Endogenous1	72.62	-0.860724	-0.957203	-0.0964789	0.151353	0.078858	0.862344	0.404732	0.361276	0.998042	3.94767	3.44493	5.47086	4.20085	2.81352	2.39232	3.65535	4.76022	2.90111	3.23266	3.79286
mmu-miR-1946b	MIMAT0009443	Endogenous1	58.51	-0.0582129	-0.168332	-0.11012	0.908162	0.803481	0.860722	0.939707	0.897573	0.998042	3.23726	3.09592	4.88606	4.04876	3.13586	3.19849	4.33342	4.36737	2.25096	3.64847	5.04658
mmu-miR-1947	MIMAT0009413	Endogenous1	63.78	0.655553	0.877984	0.222431	0.243869	0.183756	0.690737	0.496511	0.48565	0.998042	0.773996	1.95977	2.88557	0.879706	1.40054	2.85	1.91839	2.95233	1.76553	3.64847	2.09424
mmu-miR-1948	MIMAT0009415	Endogenous1	67.37	-0.506689	-1.11987	-0.613178	0.286594	0.0362175	0.123178	0.535742	0.265527	0.998042	3.36317	3.44493	5.00135	3.20006	2.98368	2.97636	3.33342	3.6893	2.61353	2.86987	2.41414
mmu-miR-1949	MIMAT0009416	Endogenous1	32.83	-0.224725	-0.46703	-0.242305	0.601048	0.231924	0.605936	0.754309	0.540132	0.998042	6.73213	6.0798	6.15886	6.37069	6.51475	6.81737	5.42089	5.68958	6.01235	6.33002	5.26266
mmu-miR-195	MIMAT0000225	Endogenous1	29.06	-0.309245	-0.240408	0.0688373	0.457414	0.52854	0.852828	0.655433	0.773007	0.998042	5.45022	5.46989	6.20789	6.52278	5.36877	5.27389	5.75969	6.01145	5.63227	5.70708	5.67751
mmu-miR-1950	MIMAT0009417	Endogenous1	57.93	-0.532036	-0.539341	-0.00730466	0.353094	0.352643	0.988965	0.589994	0.633638	0.998042	2.77821	2.63691	4.47119	4.33842	3.13586	1.97453	2.91839	4.06781	2.25096	3.38543	3.41414
mmu-miR-1951	MIMAT0009422	Endogenous1	27.42	-0.30007	-0.44009	-0.14002	0.456007	0.236343	0.709407	0.655076	0.543782	0.998042	7.48527	7.29517	8.0289	8.22757	7.38414	7.0278	7.58128	7.84342	7.18398	7.26294	7.51049
mmu-miR-1952	MIMAT0009423	Endogenous1	63.37	-1.29643	-0.631669	0.664765	0.0189517	0.205388	0.172544	0.181808	0.516665	0.998042	3.23726	3.44493	4.88606	4.33842	2.1375	2.56071	2.33342	3.6893	2.90111	3.87086	3.26303
mmu-miR-1953	MIMAT0009424	Endogenous1	34.33	-0.180207	-0.0339935	0.146214	0.698535	0.938299	0.729959	0.815197	0.970295	0.998042	5.23726	5.02945	6.43029	6.23649	5.59574	4.74846	5.97728	5.89118	5.3733	6.01748	5.70736
mmu-miR-1954	MIMAT0009425	Endogenous1	57.14	-0.0975552	-0.490172	-0.392617	0.846822	0.324818	0.48064	0.911219	0.615475	0.998042	3.0993	2.63691	4.10852	3.20006	2.98368	2.56071	2.65535	4.45483	2.25096	2.38405	3.67807
mmu-miR-1955	MIMAT0009426	Endogenous1	28.51	-0.351509	-0.578577	-0.227068	0.381677	0.11978	0.557577	0.618996	0.446068	0.998042	8.1573	7.94075	8.60478	8.75539	7.94357	7.52042	8.45232	8.13586	7.52998	7.89615	7.9318
mmu-miR-1956	MIMAT0009428	Endogenous1	44.45	-0.678401	-0.737556	-0.0591549	0.220881	0.0586924	0.918323	0.468235	0.31638	0.998042	5.47832	4.72465	5.47086	4.96625	3.13586	3.91456	5.42089	5.45516	4.65191	4.52293	4.09255
mmu-miR-1957	MIMAT0009430	Endogenous1	54.91	-1.09717	-0.746915	0.350259	0.065793	0.0838284	0.558711	0.305196	0.369388	0.998042	3.68482	4.39163	4.88606	4.04876	1.81558	2.97636	3.14078	4.68986	3.90207	3.0635	3.55213
mmu-miR-1958	MIMAT0009431	Endogenous1	42.54	-0.311372	-0.343081	-0.031709	0.546527	0.408072	0.949073	0.716051	0.693265	0.998042	5.39266	4.99458	4.76022	3.87873	3.39917	4.0917	4.79286	5.49697	4.30012	4.45549	4.48478
mmu-miR-1959	MIMAT0009432	Endogenous1	64.38	-0.783524	-0.832365	-0.0488408	0.151596	0.12693	0.910207	0.404732	0.446068	0.998042	6.02591	5.76633	7.76042	7.25389	5.36877	5.34518	6.50335	6.45516	5.69042	5.87061	6.0468
mmu-miR-1960	MIMAT0009433	Endogenous1	55.43	-1.34558	-1.22353	0.122048	0.015495	0.00352553	0.816306	0.163663	0.178391	0.998042	4.10014	4.28096	4.76022	4.57954	2.1375	3.09085	2.65535	4.45483	3.14241	3.0635	3.41414
mmu-miR-1961	MIMAT0009434	Endogenous1	63.63	-0.439271	-0.776897	-0.337626	0.44928	0.170432	0.517556	0.652851	0.479856	0.998042	4.47832	4.44427	6.43029	5.78581	4.33771	3.851	5.33342	5.85947	4.02768	4.81813	4.67751
mmu-miR-1962	MIMAT0009435	Endogenous1	45.65	-0.997457	-0.168947	0.82851	0.0838	0.698932	0.155487	0.316205	0.843285	0.998042	2.9486	3.8846	4.47119	4.04876	2.81352	1.38957	3.33342	3.8268	3.44228	3.38543	4.18031
mmu-miR-1963	MIMAT0009436	Endogenous1	50.42	-0.569755	-0.0999505	0.469804	0.307398	0.838843	0.375444	0.557652	0.907811	0.998042	2.77821	3.33771	4.62293	4.20085	3.39917	2.56071	2.33342	4.36737	3.14241	3.76341	3.9991
mmu-miR-1964	MIMAT0009437	Endogenous1	46.24	-0.923954	-0.808901	0.115052	0.06107	0.0550723	0.807514	0.305196	0.311709	0.998042	3.77821	4.16027	4.88606	4.20085	3.62176	2.39232	3.14078	4.17473	3.0268	3.76341	3.55213
mmu-miR-1965	MIMAT0009438	Endogenous1	47.38	-0.0629022	-0.533105	-0.470202	0.888573	0.396113	0.429984	0.933669	0.681035	0.998042	3.23726	3.09592	4.47119	3.87873	3.27352	3.09085	3.79286	4.27426	1.76553	3.23266	4.41481
mmu-miR-1966	MIMAT0009439	Endogenous1	68.34	-0.353945	-0.322118	0.0318263	0.536638	0.618663	0.956774	0.712265	0.806376	0.998042	2.58496	3.33771	5.00135	3.46336	2.98368	2.39232	4.42089	3.17473	2.25096	3.23266	4.34056
mmu-miR-1967	MIMAT0009440	Endogenous1	60.83	-0.664692	-0.993457	-0.328765	0.155455	0.0684768	0.448574	0.409244	0.346052	0.998042	3.86493	3.33771	5.00135	3.46336	3.13586	2.85	3.33342	3.6893	2.44361	2.64847	3.67807
mmu-miR-1968	MIMAT0009441	Endogenous1	46.97	0.391331	-0.607164	-0.998495	0.405826	0.213433	0.0543682	0.632776	0.529839	0.998042	1.36177	2.44361	2.30159	2.87971	1.81558	2.7137	2.65535	3.36737	1.44361	2.38405	1.09085
mmu-miR-1969	MIMAT0009442	Endogenous1	60.29	-0.682574	-0.159083	0.523491	0.232833	0.789982	0.205255	0.482723	0.895797	0.998042	2.10098	2.80735	4.30086	4.57954	2.1375	3.09085	2.65535	3.17473	3.24945	3.52231	3.09255
mmu-miR-196a	MIMAT0000518	Endogenous1	35.83	0.0535001	0.188646	0.135146	0.908	0.63172	0.777759	0.939707	0.815286	0.998042	6.45039	6.12887	5.88606	5.33842	6.83668	6.42459	5.58135	5.17513	6.5821	6.12928	5.70736
mmu-miR-196b	MIMAT0001081	Endogenous1	31.37	0.240467	0.170334	-0.0701332	0.582417	0.649665	0.877232	0.742451	0.820782	0.998042	7.51262	7.63699	7.00146	6.85611	8.14517	7.69495	6.58135	7.54759	7.74625	7.59462	6.92552
mmu-miR-1970	MIMAT0009444	Endogenous1	59.85	-0.502825	-0.139201	0.363625	0.415616	0.821273	0.446031	0.637606	0.90614	0.998042	2.10098	2.80735	4.62293	4.46401	2.1375	2.56071	3.91839	3.36737	3.14241	3.52231	3.41414
mmu-miR-1971	MIMAT0009446	Endogenous1	44.58	-0.0226461	0.20267	0.225316	0.964564	0.65134	0.664283	0.978309	0.821066	0.998042	3.47897	2.63691	4.10852	3.87873	3.62176	2.56071	4.65535	3.17473	3.69042	3.23266	4.26228
mmu-miR-1981	MIMAT0009458	Endogenous1	32.86	-0.362782	-0.435438	-0.0726562	0.38385	0.273284	0.852721	0.620117	0.583693	0.998042	6.15299	6.02923	7.13391	6.60674	6.11811	5.65793	6.60021	6.0955	5.80012	5.92125	6.41447
mmu-miR-1982	MIMAT0009460	Endogenous1	56.5	-0.0770288	-0.253908	-0.176879	0.893014	0.682615	0.654005	0.933669	0.836236	0.998042	3.23726	3.44493	5.30086	5.68622	3.90207	3.97636	4.79286	4.68986	4.08661	4.31107	4.09255
mmu-miR-1983	MIMAT0009455	Endogenous1	37.09	0.979594	0.891578	-0.0880162	0.037154	0.0475542	0.820355	0.241714	0.297074	0.998042	4.94767	3.72465	5.10852	4.57954	5.2407	5.9148	5.94813	5.17513	5.46499	5.67807	5.30195
mmu-miR-199a-3p	MIMAT0000230	Endogenous1	29.16	-0.148032	0.0473955	0.195428	0.715315	0.900245	0.64353	0.824579	0.948028	0.998042	9.9491	9.82801	9.36168	9.16425	9.2778	10.1174	9.23726	9.07847	10.1481	9.5124	9.20894
mmu-miR-199a-5p	MIMAT0000229	Endogenous1	33.8	-0.568766	-0.10142	0.467346	0.18896	0.799254	0.249246	0.436537	0.895797	0.998042	7.81686	7.70839	6.94486	6.71177	6.84775	7.21772	6.54288	6.29848	7.40829	7.36702	6.80684
mmu-miR-19a	MIMAT0000651	Endogenous1	51.13	1.26292	0.860481	-0.402439	0.00570964	0.0488562	0.38416	0.119691	0.29734	0.998042	6.51932	6.75596	6.82451	6.94498	8.08108	8.62238	7.96999	7.42299	8.34336	7.57107	6.95059
mmu-miR-19b	MIMAT0000513	Endogenous1	48.52	1.09029	0.977553	-0.112738	0.0230971	0.0327854	0.808208	0.202452	0.257729	0.998042	5.55919	5.56773	6.05593	6.43346	6.18923	7.60548	7.3557	6.82706	7.385	7.01748	6.24241
mmu-miR-200a	MIMAT0000519	Endogenous1	32.37	-0.644457	-0.851475	-0.207019	0.107197	0.0203219	0.581994	0.344889	0.231755	0.998042	8.24551	8.34775	7.79286	8.02862	7.96907	7.45187	7.1535	7.26247	7.2817	7.19249	7.28244
mmu-miR-200b	MIMAT0000233	Endogenous1	32.61	-0.497927	-0.580619	-0.0826919	0.244798	0.122001	0.84404	0.496615	0.446068	0.998042	11.2379	11.1591	10.7251	10.4638	11.1077	10.4066	9.74064	10.3392	10.5562	10.4009	9.99044
mmu-miR-200c	MIMAT0000657	Endogenous1	25.73	0.435152	0.55434	0.119189	0.285073	0.156116	0.748982	0.535742	0.470009	0.998042	9.92893	9.84884	9.26099	8.93955	10.326	9.70177	9.71058	9.98054	9.86034	9.97464	10.3118
mmu-miR-201	MIMAT0000234	Endogenous1	50.06	-1.17003	-1.01063	0.159398	0.0239652	0.0178069	0.755136	0.202452	0.217107	0.998042	5.53294	4.84649	5.20789	4.96625	3.27352	3.39094	4.03386	5.17513	3.83491	3.87086	4.67751
mmu-miR-202-3p	MIMAT0000235	Endogenous1	49.38	-0.963841	-1.13286	-0.16902	0.0633606	0.00904118	0.746211	0.305196	0.19682	0.998042	4.23726	4.16027	4.88606	4.57954	2.40054	3.19849	3.79286	4.61589	3.14241	3.0635	3.79286
mmu-miR-202-5p	MIMAT0004546	Endogenous1	59.39	-0.510499	-0.567136	-0.0566369	0.348551	0.322753	0.895847	0.587142	0.615475	0.998042	4.58556	5.12887	6.85562	6.33825	5.0237	4.52042	5.46271	5.85947	4.72792	5.23304	5.51885
mmu-miR-203	MIMAT0000236	Endogenous1	30.79	0.894998	0.634378	-0.26062	0.0284769	0.0762974	0.477904	0.21781	0.361276	0.998042	5.26978	5.49506	5.88606	5.78581	6.85873	6.41346	6.39951	6.34501	6.14303	6.47265	6.11499
mmu-miR-204	MIMAT0000237	Endogenous1	45.7	-1.07639	-0.673586	0.402801	0.0403626	0.0947713	0.438022	0.259605	0.403033	0.998042	4.63575	4.76607	5.30086	4.33842	3.62176	2.56071	3.79286	4.76022	3.61235	4.38543	4.26228
mmu-miR-205	MIMAT0000238	Endogenous1	67.03	2.15689	1.17608	-0.980809	0.000360921	0.0217014	0.027143	0.0255352	0.231755	0.998042	7.71459	7.58534	6.10832	6.68622	8.48317	9.65912	9.24627	9.33345	8.25304	8.12933	8.2167
mmu-miR-206	MIMAT0000239	Endogenous1	33.87	-0.0433684	-0.291059	-0.247691	0.923956	0.41241	0.598031	0.94739	0.694714	0.998042	3.0993	3.8846	3.62293	3.20006	3.27352	2.39232	3.79286	4.17473	3.34908	2.86987	3.26303
mmu-miR-207	MIMAT0000240	Endogenous1	49.19	-0.793017	-0.42245	0.370567	0.127063	0.343893	0.466149	0.37263	0.631959	0.998042	3.36317	2.44361	3.88557	2.87971	1.81558	1.7137	2.33342	3.5373	2.25096	3.23266	2.67807
mmu-miR-208a	MIMAT0000520	Endogenous1	60.36	-0.758479	-0.457905	0.300574	0.147003	0.410325	0.473669	0.400387	0.693265	0.998042	3.0993	2.80735	4.30086	4.87873	2.81352	2.56071	3.50335	3.17473	2.76341	3.76341	3.41414
mmu-miR-208b	MIMAT0004939	Endogenous1	69.91	-0.13661	0.20206	0.338671	0.821032	0.776929	0.43237	0.897952	0.890166	0.998042	1.36177	2.63691	4.76022	3.20006	2.81352	3.09085	3.14078	2.36737	3.0268	2.64847	3.90014
mmu-miR-20a驫miR-20b	MIMAT0000529	Endogenous1	52.46	1.17767	0.468977	-0.708689	0.0109884	0.212445	0.133866	0.152705	0.529708	0.998042	9.26978	9.23129	9.20787	8.8732	10.9779	10.6188	10.0338	9.66229	10.114	9.6798	9.04971
mmu-miR-21	MIMAT0000530	Endogenous1	50.28	1.188	1.16745	-0.0205504	0.0116047	0.0132696	0.96497	0.152705	0.200961	0.998042	9.58528	9.67862	9.24348	9.06372	11.0515	11.0332	10.434	9.80437	10.9288	10.9588	9.79303
mmu-miR-210	MIMAT0000658	Endogenous1	28.47	-0.647019	-0.369687	0.277332	0.106288	0.310236	0.477291	0.344889	0.605653	0.998042	7.6359	7.62564	7.2317	6.98743	7.03342	6.90689	6.35579	6.59649	7.12195	7.31116	6.56834
mmu-miR-211	MIMAT0000668	Endogenous1	42.46	0.400493	0.867256	0.466763	0.423092	0.0712619	0.312654	0.637606	0.353809	0.998042	2.10098	2.80735	3.88557	2.87971	3.62176	2.56071	2.91839	4.17473	3.83491	3.96993	3.55213
mmu-miR-212	MIMAT0000659	Endogenous1	69.73	-0.50763	-0.214639	0.292991	0.370734	0.729713	0.464994	0.608219	0.856882	0.998042	2.9486	3.44493	5.69321	4.57954	3.13586	3.63923	3.79286	4.06781	3.52982	4.23343	4.09255
mmu-miR-2132	MIMAT0011208	Endogenous1	27.68	0.362297	0.210137	-0.15216	0.378258	0.562066	0.698489	0.616986	0.778981	0.998042	8.36286	8.18383	8.93032	9.04879	9.59563	8.77271	8.62797	8.97868	8.57179	9.04338	8.90959
mmu-miR-2133	MIMAT0011209	Endogenous1	51.2	0.502549	0.0821357	-0.420413	0.399978	0.904479	0.31872	0.627743	0.948028	0.998042	5.92766	5.56773	7.82451	8.29669	7.90171	7.38552	7.20369	7.13586	6.70929	6.6178	7.63176
mmu-miR-2134	MIMAT0011210	Endogenous1	40.44	0.822588	0.434356	-0.388232	0.14155	0.472622	0.32681	0.394667	0.732759	0.998042	8.89685	8.88013	10.9102	10.8845	11.0646	10.3018	10.6788	10.8168	9.91416	10.3863	10.6813
mmu-miR-2135	MIMAT0011211	Endogenous1	40.04	0.998637	0.648778	-0.349858	0.092437	0.312363	0.350054	0.32767	0.607551	0.998042	7.04472	6.65935	9.0954	8.96633	9.06695	8.53325	8.99158	9.16857	8.43116	8.54303	8.79649
mmu-miR-2136	MIMAT0011212	Endogenous1	51.93	0.242342	0.676398	0.434056	0.70523	0.332506	0.403979	0.81963	0.623173	0.998042	2.10098	2.44361	4.47119	4.68594	3.51475	2.56071	4.14078	4.45483	3.44228	4.31107	4.55213
mmu-miR-2137	MIMAT0011213	Endogenous1	35.08	0.550037	0.143114	-0.406923	0.26109	0.775016	0.283455	0.507293	0.889775	0.998042	4.36317	4.76607	5.94486	6.27109	5.83668	5.49985	6.14078	6.06803	5.27538	5.45549	5.70736
mmu-miR-2138	MIMAT0011214	Endogenous1	40.51	1.02638	0.677749	-0.348627	0.0778016	0.28695	0.37894	0.313359	0.593385	0.998042	5.96763	5.30925	7.67603	7.68622	7.95385	7.25531	7.79279	7.74268	6.87713	7.4208	7.71466
mmu-miR-2139	MIMAT0011215	Endogenous1	54.22	-0.749984	-1.01191	-0.261923	0.147835	0.03012	0.596069	0.400387	0.257729	0.998042	5.92766	5.59126	7.00146	6.33825	4.51475	5.0635	5.82528	6.45516	5.08619	4.96993	5.55213
mmu-miR-214	MIMAT0000661	Endogenous1	28.91	-0.512271	-0.518501	-0.00622974	0.255688	0.130037	0.989064	0.506012	0.446068	0.998042	5.23726	4.80684	4.62293	4.87873	3.27352	4.67638	4.65535	4.89142	4.52982	4.23343	4.34056
mmu-miR-2140	MIMAT0011216	Endogenous1	42.99	0.559373	0.331763	-0.22761	0.242377	0.477233	0.620541	0.496435	0.734404	0.998042	8.5194	8.892	9.79683	9.89008	9.46352	9.26461	9.98262	10.6251	9.24339	9.32064	10.255
mmu-miR-2141	MIMAT0011217	Endogenous1	42.1	0.83081	0.526579	-0.304231	0.10994	0.317539	0.468541	0.3457	0.612917	0.998042	10.3991	10.4002	12.1035	11.8374	11.7387	11.5355	12.1659	12.6233	11.4548	11.501	12.1791
mmu-miR-2145	MIMAT0011221	Endogenous1	48.92	0.0385456	-0.0365119	-0.0750575	0.945342	0.948822	0.884468	0.965818	0.972886	0.998042	3.86493	3.22188	5.30086	5.12681	3.62176	3.78346	5.08831	5.17513	3.69042	4.38543	4.95047
mmu-miR-2146	MIMAT0011222	Endogenous1	36.36	0.408108	0.264902	-0.143206	0.388206	0.599898	0.727661	0.622262	0.798885	0.998042	8.03529	7.61993	9.06915	9.37871	8.61519	8.66963	9.05788	9.39281	8.3996	8.58289	9.38952
mmu-miR-216a	MIMAT0000662	Endogenous1	76.75	-1.32039	-0.712606	0.607781	0.0289714	0.232848	0.188682	0.218637	0.540132	0.998042	3.68482	3.22188	5.47086	5.12681	2.98368	2.19849	3.50335	3.5373	3.24945	3.64847	4.09255
mmu-miR-216b	MIMAT0003729	Endogenous1	63.42	-0.120256	0.0876145	0.20787	0.844574	0.900833	0.587339	0.910531	0.948028	0.998042	3.0993	1.95977	5.30086	4.33842	3.39917	3.19849	3.79286	3.8268	3.90207	3.38543	3.9991
mmu-miR-217	MIMAT0000679	Endogenous1	65.72	-0.662589	-0.729339	-0.0667507	0.246152	0.214428	0.88384	0.496645	0.529984	0.998042	2.10098	2.44361	4.30086	3.87873	2.81352	1.97453	1.91839	3.36737	2.02857	2.64847	2.67807
mmu-miR-218	MIMAT0000663	Endogenous1	34.13	-0.522914	-0.251549	0.271365	0.199272	0.538136	0.512124	0.447571	0.778981	0.998042	3.47897	3.33771	4.30086	3.87873	2.98368	3.09085	3.14078	3.6893	3.24945	4.15056	3.09255
mmu-miR-2182	MIMAT0011286	Endogenous1	52.49	-0.299819	-0.497798	-0.197979	0.566733	0.388244	0.661764	0.730686	0.678229	0.998042	2.77821	1.95977	4.10852	3.87873	2.62059	2.56071	2.65535	3.6893	2.25096	3.38543	2.41414
mmu-miR-2183	MIMAT0011287	Endogenous1	60.87	0.666767	0.644683	-0.0220847	0.168744	0.298921	0.968241	0.418899	0.594443	0.998042	5.90713	5.74551	7.00146	7.20075	6.82553	6.54086	7.62797	7.52756	6.11499	6.79116	8.41903
mmu-miR-219	MIMAT0000664	Endogenous1	46.44	-0.30622	-0.73992	-0.433699	0.522255	0.172338	0.382972	0.705481	0.479856	0.998042	3.0993	3.44493	4.30086	4.68594	2.81352	3.39094	4.03386	4.06781	2.25096	3.76341	3.41414
mmu-miR-22	MIMAT0000531	Endogenous1	32.63	-0.500174	-0.230889	0.269285	0.26059	0.518676	0.568839	0.507293	0.770456	0.998042	10.1519	9.79808	9.86703	9.56535	10.2747	9.53582	8.87252	8.69857	9.64829	10.0534	9.14244
mmu-miR-220	MIMAT0004863	Endogenous1	62.76	-1.44672	-0.728944	0.717779	0.00671862	0.129013	0.128672	0.131129	0.446068	0.998042	3.58496	3.22188	4.76022	4.04876	2.98368	1.97453	1.91839	2.95233	2.61353	3.64847	3.26303
mmu-miR-221	MIMAT0000669	Endogenous1	51.67	-0.657989	-0.787536	-0.129547	0.192156	0.140874	0.771219	0.440325	0.460608	0.998042	5.39266	3.95884	5.94486	5.12681	3.81455	4.19849	5.08831	4.68986	3.69042	4.64847	4.61589
mmu-miR-222	MIMAT0000670	Endogenous1	37.94	-0.746013	-0.63578	0.110232	0.0811821	0.105138	0.781966	0.314069	0.416117	0.998042	4.53294	4.44427	5.30086	4.46401	4.27352	3.97636	3.33342	4.17473	3.76447	3.96993	4.41481
mmu-miR-223	MIMAT0000665	Endogenous1	20.86	-0.298568	-0.090121	0.208447	0.44289	0.791087	0.615336	0.650267	0.895797	0.998042	8.73792	8.48244	8.64972	8.47877	8.34957	8.5611	8.60947	7.63445	8.81753	8.67426	7.99949
mmu-miR-224	MIMAT0000671	Endogenous1	49.67	-0.919683	-0.945341	-0.0256587	0.0943644	0.0273735	0.962566	0.32767	0.248781	0.998042	5.20438	5.22188	5.54905	4.46401	2.98368	3.78346	4.58135	5.4121	4.52982	4.0635	3.90014
mmu-miR-23a	MIMAT0000532	Endogenous1	18.57	-0.514505	-0.190909	0.323596	0.178485	0.533965	0.386634	0.429771	0.776927	0.998042	9.69827	9.88251	9.78075	9.5793	8.75091	9.33514	9.33898	9.45777	9.61616	9.48951	9.52722
mmu-miR-23b	MIMAT0000125	Endogenous1	19.58	-0.178306	-0.1759	0.00240623	0.637868	0.621166	0.994635	0.771372	0.806376	0.998042	9.94784	10.0087	9.23762	9.37871	9.28596	9.57355	9.50579	9.49438	9.4453	9.22564	9.73103
mmu-miR-24	MIMAT0000219	Endogenous1	30.49	0.186258	0.149935	-0.036323	0.692169	0.732652	0.929774	0.812797	0.858553	0.998042	6.72042	7.21442	5.47086	6.43346	5.81429	6.96104	6.84122	6.96763	6.52998	6.50621	6.79299
mmu-miR-25	MIMAT0000652	Endogenous1	24.19	0.702146	0.474666	-0.227481	0.0721089	0.16111	0.52472	0.305196	0.475561	0.998042	8.44679	8.12882	7.95919	7.84461	9.03345	8.72209	8.60947	8.82299	8.6737	8.6024	8.43246
mmu-miR-26a	MIMAT0000533	Endogenous1	38.02	-0.880589	-0.942316	-0.0617264	0.0358959	0.0147666	0.875083	0.241714	0.200961	0.998042	5.17033	5.44427	5.00135	5.46369	4.20633	4.19849	4.14078	5.01167	4.65191	4.15056	4.18031
mmu-miR-26b	MIMAT0000534	Endogenous1	34.37	-0.755274	-0.691896	0.0633781	0.0627976	0.077688	0.869982	0.305196	0.361276	0.998042	7.41456	7.36484	6.82451	6.83302	6.67228	6.46793	6.26416	6.01145	6.90195	6.21296	6.13709
mmu-miR-27a	MIMAT0000537	Endogenous1	19.05	0.188494	0.0654228	-0.123071	0.610544	0.846663	0.746331	0.758098	0.908568	0.998042	9.54444	9.61138	9.50064	9.14565	9.5907	10.0187	9.45748	9.48921	9.94533	9.24315	9.35938
mmu-miR-27b	MIMAT0000126	Endogenous1	54.14	1.511	0.937973	-0.573029	0.00208824	0.0180283	0.170782	0.0622076	0.217107	0.998042	5.88655	6.25172	6.72724	6.40242	8.48671	7.82165	7.71706	7.28651	7.17722	7.47265	7.11499
mmu-miR-28	MIMAT0000653	Endogenous1	25.05	-0.151701	-0.220557	-0.0688554	0.704437	0.562903	0.852366	0.81963	0.778981	0.998042	6.43613	6.54381	5.69321	5.57924	5.64703	6.13258	6.14078	5.7252	6.14303	5.70708	5.67751
mmu-miR-2861	MIMAT0013803	Endogenous1	62.55	-0.228651	-0.627404	-0.398753	0.68645	0.381408	0.462861	0.809439	0.670426	0.998042	1.77821	1.95977	4.10852	3.68594	2.62059	1.97453	3.33342	2.6893	2.44361	3.23266	1.09085
mmu-miR-290-3p	MIMAT0004572	Endogenous1	49.56	-0.296173	-0.19631	0.0998628	0.53887	0.698994	0.824846	0.712265	0.843285	0.998042	2.9486	3.72465	4.76022	3.20006	2.98368	3.47897	2.91839	4.06781	3.14241	3.0635	4.18031
mmu-miR-290-5p	MIMAT0000366	Endogenous1	49.28	-0.475852	-0.458748	0.0171041	0.394144	0.349384	0.973632	0.624889	0.633638	0.998042	3.36317	2.44361	4.30086	4.04876	2.1375	2.39232	3.65535	4.06781	2.76341	3.0635	3.41414
mmu-miR-291a-3p	MIMAT0000368	Endogenous1	50.68	0.00722347	-0.168853	-0.176077	0.99109	0.80401	0.722831	0.996227	0.897573	0.998042	3.47897	3.44493	3.88557	0.879706	3.13586	1.97453	2.65535	3.95233	2.61353	3.23266	2.41414
mmu-miR-291a-5p	MIMAT0000367	Endogenous1	74.44	-0.886372	0.255746	1.14212	0.345073	0.723662	0.202522	0.586521	0.855524	0.998042	0.773996	3.09592	4.47119	2.87971	0	0.389567	3.33342	3.95233	3.0268	3.0635	3.09255
mmu-miR-291b-3p	MIMAT0003190	Endogenous1	68.27	-0.810367	-0.585529	0.224838	0.126313	0.30706	0.632905	0.37236	0.605562	0.998042	2.77821	3.09592	4.88606	3.68594	2.81352	2.19849	2.65535	3.5373	2.90111	2.38405	3.79286
mmu-miR-291b-5p	MIMAT0003189	Endogenous1	33.85	-0.582492	-0.245451	0.337041	0.179957	0.520471	0.40277	0.429771	0.770456	0.998042	3.23726	2.95977	4.10852	3.68594	2.81352	2.39232	3.50335	2.95233	3.14241	3.52231	3.09255
mmu-miR-292-3p	MIMAT0000370	Endogenous1	61.31	-0.445342	-0.484834	-0.0394918	0.423302	0.424439	0.933675	0.637606	0.704495	0.998042	2.77821	2.22342	4.62293	3.87873	2.1375	2.7137	3.33342	3.5373	2.25096	2.86987	3.55213
mmu-miR-292-5p	MIMAT0000369	Endogenous1	57.4	-0.990956	-1.30728	-0.316321	0.0477969	0.00610651	0.494322	0.278976	0.19682	0.998042	3.58496	3.44493	4.62293	3.87873	2.98368	2.97636	1.91839	3.6893	2.44361	2.38405	2.89918
mmu-miR-293	MIMAT0000371	Endogenous1	46	-0.11674	-0.262223	-0.145483	0.817986	0.637805	0.705058	0.897248	0.815286	0.998042	3.23726	2.22342	4.62293	4.04876	3.39917	3.29866	3.14078	3.8268	2.90111	3.64847	3.26303
mmu-miR-294	MIMAT0000372	Endogenous1	41.1	-0.00069946	-0.297469	-0.29677	0.998729	0.548345	0.515991	0.998734	0.778981	0.998042	3.58496	2.95977	4.47119	3.20006	3.39917	3.09085	3.65535	4.06781	2.61353	3.0635	4.09255
mmu-miR-295	MIMAT0000373	Endogenous1	55.6	-0.429372	-0.128873	0.300499	0.423403	0.834373	0.543944	0.637606	0.907811	0.998042	2.58496	1.63691	4.10852	3.20006	2.81352	1.7137	2.91839	2.36737	1.76553	3.23266	3.26303
mmu-miR-296-3p	MIMAT0004576	Endogenous1	43.2	-0.324563	-0.445791	-0.121228	0.491509	0.39435	0.756355	0.680182	0.681035	0.998042	1.77821	2.95977	3.30159	3.87873	2.62059	2.7137	2.91839	2.36737	2.44361	3.0635	2.09424
mmu-miR-296-5p	MIMAT0000374	Endogenous1	47.48	0.220756	0.175707	-0.0450491	0.678459	0.746871	0.925729	0.801686	0.862912	0.998042	2.9486	1.63691	3.88557	2.46467	2.1375	2.7137	3.14078	3.8268	2.25096	3.38543	3.09255
mmu-miR-297a驫miR-466f驫miR-669b	MIMAT0000375	Endogenous1	37.38	-0.114326	0.0373345	0.151661	0.804311	0.939774	0.736866	0.892157	0.970295	0.998042	3.77821	3.72465	5.00135	5.04876	4.33771	3.56071	4.58135	4.61589	3.69042	4.58676	4.99955
mmu-miR-297b-3p	MIMAT0004827	Endogenous1	55.58	-1.17937	-1.51446	-0.335096	0.0105814	0.0144159	0.532215	0.152705	0.200961	0.998042	3.58496	3.44493	4.30086	4.04876	2.40054	2.56071	3.33342	2.36737	1.02857	3.0635	2.89918
mmu-miR-297b-5p	MIMAT0003480	Endogenous1	49.72	-0.898842	-1.08303	-0.184188	0.068995	0.0161578	0.694866	0.305196	0.207848	0.998042	4.53294	3.95884	4.76022	5.12681	3.39917	2.85	3.91839	4.61589	3.24945	3.38543	3.90014
mmu-miR-297c	MIMAT0004865	Endogenous1	43.07	-0.303366	-0.18934	0.114026	0.527728	0.698972	0.793525	0.709721	0.843285	0.998042	4.94767	4.59096	6.34536	5.78581	4.90159	4.52042	5.75969	5.27463	4.65191	5.61794	5.41447
mmu-miR-298	MIMAT0000376	Endogenous1	52.95	-0.757196	-0.826562	-0.0693664	0.146271	0.104088	0.87596	0.400387	0.414885	0.998042	5.20438	4.28096	6.00135	6.00809	4.20633	3.91456	5.33342	5.01167	4.19771	4.70708	4.7366
mmu-miR-299	MIMAT0004577	Endogenous1	56.78	-0.77054	-0.531853	0.238687	0.167433	0.323872	0.604701	0.417733	0.615475	0.998042	3.23726	4.02945	5.30086	5.12681	3.27352	2.85	4.42089	4.06781	3.76447	3.64847	4.26228
mmu-miR-29a	MIMAT0000535	Endogenous1	34.72	-0.340531	-0.147573	0.192958	0.434751	0.743211	0.659492	0.642366	0.862912	0.998042	9.57071	9.46191	8.50064	8.48619	8.99667	9.06005	8.47804	8.12257	9.25788	9.177	8.13699
mmu-miR-29b	MIMAT0000127	Endogenous1	31.94	-0.526947	-0.153115	0.373832	0.232315	0.666628	0.441896	0.482723	0.823824	0.998042	7.49217	7.60274	7.51041	7.68622	6.32211	8.00585	7.16621	6.68958	7.75989	7.69258	6.80684
mmu-miR-29c	MIMAT0000536	Endogenous1	26.18	-0.696088	-0.19233	0.503758	0.0823131	0.559693	0.213777	0.314069	0.778981	0.998042	7.77795	7.9901	7.97338	7.66021	7.31415	7.62	6.77637	6.90677	7.79565	7.89615	7.28244
mmu-miR-300	MIMAT0000378	Endogenous1	44.88	-0.862807	-0.739049	0.123758	0.0960795	0.132049	0.832208	0.329582	0.44921	0.998042	4.68482	3.8846	4.62293	4.20085	2.62059	2.7137	4.24031	4.36737	3.76447	2.64847	4.41481
mmu-miR-301a	MIMAT0000379	Endogenous1	24.47	0.270791	0.228481	-0.0423099	0.514114	0.527185	0.91369	0.697814	0.773007	0.998042	5.63575	5.06307	6.05593	5.96625	5.39917	5.78346	6.42089	6.20065	5.83491	5.84449	6.0468
mmu-miR-301b	MIMAT0004186	Endogenous1	70.84	-0.105726	-0.855991	-0.750265	0.875465	0.24559	0.226125	0.928078	0.547259	0.998042	2.9486	2.22342	5.00135	4.68594	3.51475	2.19849	4.65535	4.06781	2.02857	2.86987	3.67807
mmu-miR-302a	MIMAT0000380	Endogenous1	74.01	-0.495502	-0.420514	0.0749887	0.415325	0.565694	0.883182	0.637606	0.780933	0.998042	2.36177	2.22342	4.88606	4.20085	2.81352	2.19849	3.50335	3.17473	2.25096	4.0635	2.67807
mmu-miR-302b	MIMAT0003374	Endogenous1	45.3	-0.86569	-0.979701	-0.11401	0.131924	0.0284385	0.853415	0.379132	0.251503	0.998042	3.0993	3.22188	3.88557	3.46336	0.815575	2.7137	3.14078	3.5373	1.76553	2.86987	2.67807
mmu-miR-302c	MIMAT0003376	Endogenous1	55.86	-0.513649	-0.852316	-0.338667	0.31289	0.0791489	0.507774	0.561313	0.361276	0.998042	1.77821	2.22342	3.30159	2.46467	1.81558	1.38957	3.14078	1.36737	1.02857	1.64616	2.09424
mmu-miR-302d	MIMAT0003377	Endogenous1	56.82	-0.302145	-0.546688	-0.244543	0.586722	0.314951	0.684913	0.742919	0.610487	0.998042	3.58496	3.33771	5.00135	4.04876	3.13586	2.56071	4.24031	4.82731	2.61353	3.38543	4.34056
mmu-miR-3072	MIMAT0014853	Endogenous1	49.52	-0.455157	0.232621	0.687778	0.444617	0.638113	0.228025	0.650267	0.815286	0.998042	2.58496	1.63691	3.62293	1.87971	2.81352	0.389567	2.33342	2.36737	2.44361	2.64847	2.89918
mmu-miR-3099	MIMAT0014816	Endogenous1	45.78	0.138089	-0.911549	-1.04964	0.767575	0.116793	0.0500616	0.868895	0.446068	0.998042	2.10098	3.09592	3.88557	3.46336	3.51475	2.56071	3.33342	3.6893	1.76553	1.64616	3.26303
mmu-miR-30a	MIMAT0000128	Endogenous1	31.94	-0.850127	-0.725184	0.124943	0.0331384	0.0448572	0.739121	0.238343	0.288513	0.998042	7.62344	7.89433	7.9157	7.94492	7.3378	6.69488	6.96278	6.98242	6.90195	7.48107	6.97522
mmu-miR-30b	MIMAT0000130	Endogenous1	23.21	-0.0389034	0.0227754	0.0616788	0.921675	0.947914	0.878451	0.946766	0.972886	0.998042	7.17023	7.42484	7.47094	7.91229	6.93322	7.84235	7.80909	7.23802	7.24982	7.91498	7.38724
mmu-miR-30c	MIMAT0000514	Endogenous1	51.95	-1.48216	-1.19495	0.287207	0.00096728	0.00274777	0.421258	0.0497709	0.155524	0.998042	8.55271	8.72707	8.83235	8.41024	7.14517	7.26772	6.91839	7.26247	7.50859	7.3394	7.45894
mmu-miR-30d	MIMAT0000515	Endogenous1	33.6	-0.777915	-0.458149	0.319766	0.0634364	0.225555	0.420946	0.305196	0.536405	0.998042	7.72629	7.54982	6.85562	7.37069	6.20653	6.66732	6.46271	7.0542	6.68089	6.72151	7.34997
mmu-miR-30e	MIMAT0000248	Endogenous1	30.53	-0.708022	-0.679246	0.0287763	0.0733334	0.0577159	0.936928	0.305196	0.314108	0.998042	5.63575	5.97682	5.69321	6.20085	4.98413	5.11894	5.03386	5.53761	5.02724	5.38509	5.17991
mmu-miR-31	MIMAT0000538	Endogenous1	49.62	1.77324	1.55059	-0.222654	0.000291324	0.0005718	0.543888	0.0235557	0.0535875	0.998042	5.68482	5.12887	5.30086	5.12681	6.69697	7.33949	7.04756	7.2503	6.9344	6.88338	6.765
mmu-miR-32	MIMAT0000654	Endogenous1	26.24	0.185485	0.161012	-0.0244725	0.660568	0.702634	0.947753	0.787119	0.843285	0.998042	5.02591	5.09635	5.76049	4.20085	4.90159	5.29793	5.50335	5.12267	5.34944	4.81813	5.37816
mmu-miR-320	MIMAT0000666	Endogenous1	41.59	-0.252944	-0.0595513	0.193392	0.598262	0.906707	0.631295	0.754309	0.948606	0.998042	4.16993	4.39163	5.82451	5.78581	4.39917	4.78346	5.28762	4.68986	4.52982	5.42089	4.99955
mmu-miR-322	MIMAT0000548	Endogenous1	24.08	-0.221958	0.188263	0.410222	0.599862	0.594616	0.324168	0.754309	0.797172	0.998042	5.17033	4.95884	5.47086	4.46401	3.98459	5.14608	5.03386	5.01167	5.32517	5.15056	5.13709
mmu-miR-323-3p	MIMAT0000551	Endogenous1	65.7	-0.755433	-0.474135	0.281298	0.1758	0.437761	0.528934	0.429152	0.711991	0.998042	2.9486	3.44493	5.30086	4.78555	3.27352	3.19849	2.91839	4.06781	3.0268	3.64847	4.26228
mmu-miR-323-5p	MIMAT0004638	Endogenous1	73.59	-0.641021	-1.22667	-0.585644	0.329958	0.0511665	0.422671	0.572872	0.304845	0.998042	2.58496	2.80735	4.30086	3.68594	1.40054	1.7137	3.33342	4.36737	1.44361	3.23266	1.67807
mmu-miR-324-3p	MIMAT0000556	Endogenous1	55.77	-0.407666	-0.28581	0.121857	0.469365	0.576402	0.818145	0.667489	0.788027	0.998042	2.9486	2.22342	4.30086	2.87971	1.40054	2.7137	3.65535	2.95233	2.25096	3.0635	3.09255
mmu-miR-324-5p	MIMAT0000555	Endogenous1	42.48	0.135919	0.175719	0.0398001	0.785272	0.684059	0.930862	0.881873	0.836236	0.998042	3.68482	3.5435	5.10852	3.87873	3.27352	3.91456	5.03386	4.5373	4.19771	4.15056	4.34056
mmu-miR-325	MIMAT0004640	Endogenous1	36.25	-0.231346	-0.184169	0.0471773	0.603177	0.659444	0.918511	0.755306	0.823556	0.998042	3.36317	2.95977	4.10852	3.20006	2.98368	2.39232	3.50335	3.8268	2.90111	3.87086	2.89918
mmu-miR-326	MIMAT0000559	Endogenous1	53.09	-1.70709	-0.999751	0.707334	0.00132163	0.0104472	0.141548	0.0542239	0.200961	0.998042	5.17033	5.25172	5.47086	5.04876	3.98459	2.7137	3.14078	4.27426	4.02768	4.58676	4.09255
mmu-miR-327	MIMAT0004867	Endogenous1	46.19	-0.489721	-0.159328	0.330393	0.338613	0.741273	0.45477	0.577274	0.862912	0.998042	2.9486	2.80735	4.47119	4.20085	2.98368	2.39232	3.14078	3.95233	3.14241	3.64847	3.55213
mmu-miR-328	MIMAT0000565	Endogenous1	34.7	-0.583844	-0.605903	-0.0220586	0.158717	0.129055	0.951569	0.409897	0.446068	0.998042	4.16993	3.8846	4.88606	4.87873	4.06178	3.851	4.03386	3.5373	3.69042	4.0635	3.79286
mmu-miR-329	MIMAT0000567	Endogenous1	44.62	-1.05141	-0.362221	0.68919	0.0328713	0.36931	0.147043	0.238343	0.657325	0.998042	4.30159	4.9222	4.76022	5.52262	2.98368	3.63923	4.14078	4.5373	4.44228	4.15056	4.95047
mmu-miR-33	MIMAT0000667	Endogenous1	33.5	-0.678484	-0.00455465	0.67393	0.124826	0.99053	0.121646	0.371638	0.99053	0.998042	5.39266	4.28096	5.00135	5.20085	3.62176	4.19849	4.72574	4.61589	4.96625	5.31107	4.61589
mmu-miR-330	MIMAT0004642	Endogenous1	50.56	-1.30843	-1.19637	0.112065	0.0142365	0.00716019	0.830886	0.16169	0.19682	0.998042	5.02591	4.99458	5.38853	4.78555	2.62059	3.39094	4.33342	4.61589	4.14323	4.15056	3.26303
mmu-miR-331-3p	MIMAT0000571	Endogenous1	30.85	-0.433184	-0.238511	0.194673	0.313383	0.49614	0.675048	0.561313	0.750446	0.998042	4.86542	5.06307	4.76022	4.96625	3.98459	3.91456	4.65535	5.36772	4.61235	4.23343	5.17991
mmu-miR-331-5p	MIMAT0004643	Endogenous1	32.29	-0.620747	-0.676856	-0.0561091	0.146631	0.0631777	0.897346	0.400387	0.331098	0.998042	5.53294	5.8268	5.62293	5.92315	4.45812	4.81762	5.28762	5.85947	5.02724	4.70708	5.41447
mmu-miR-335-3p	MIMAT0004704	Endogenous1	43.5	-0.190987	-0.174134	0.0168531	0.711227	0.668306	0.976812	0.821539	0.824098	0.998042	5.23726	4.54411	4.62293	5.12681	4.13586	3.47897	5.65535	5.49697	4.44228	4.23343	5.45022
mmu-miR-335-5p	MIMAT0000766	Endogenous1	68.7	-0.643839	-0.608677	0.0351618	0.262001	0.292633	0.935572	0.507293	0.593385	0.998042	3.23726	4.22188	5.88606	4.78555	2.98368	3.78346	4.33342	4.45483	3.90207	3.87086	3.9991
mmu-miR-337-3p	MIMAT0000578	Endogenous1	61.43	-0.688321	-0.483896	0.204425	0.196864	0.373463	0.649563	0.446885	0.662633	0.998042	3.36317	2.80735	5.00135	4.04876	2.81352	2.56071	3.14078	3.95233	2.76341	3.52231	3.67807
mmu-miR-337-5p	MIMAT0004644	Endogenous1	41.13	-0.755251	-0.0898071	0.665443	0.133299	0.82129	0.172479	0.379132	0.90614	0.998042	3.94767	2.80735	4.10852	3.46336	2.1375	2.56071	2.65535	3.95233	3.69042	3.52231	3.26303
mmu-miR-338-3p	MIMAT0000582	Endogenous1	52.36	-1.25992	-0.872063	0.387854	0.0245556	0.040458	0.479995	0.204389	0.277341	0.998042	4.10014	4.54411	5.10852	4.68594	2.81352	2.39232	3.50335	4.68986	3.24945	3.87086	4.09255
mmu-miR-338-5p	MIMAT0004647	Endogenous1	45.94	-0.255491	-0.0134928	0.241998	0.65226	0.978921	0.676441	0.780506	0.98941	0.998042	4.42156	4.39163	5.82451	5.73688	4.76871	3.39094	5.65535	5.53761	4.39643	5.10769	5.73633
mmu-miR-339-3p	MIMAT0004649	Endogenous1	70.84	-0.510174	-0.465429	0.0447453	0.393076	0.415194	0.92838	0.624889	0.695265	0.998042	2.77821	2.44361	3.62293	4.87873	3.13586	2.56071	4.03386	1.95233	2.76341	2.86987	3.26303
mmu-miR-339-5p	MIMAT0000584	Endogenous1	39.78	0.878196	0.625198	-0.252998	0.101274	0.288583	0.534945	0.338065	0.593385	0.998042	0	2.44361	1.29866	1.87971	2.1375	1.97453	2.33342	2.6893	1.76553	2.64847	1.67807
mmu-miR-340-3p	MIMAT0000586	Endogenous1	38.18	-0.236376	-0.465507	-0.22913	0.610764	0.241626	0.638787	0.758098	0.544861	0.998042	3.86493	4.09677	4.76022	3.87873	2.98368	3.56071	4.42089	4.68986	4.14323	3.23266	3.67807
mmu-miR-340-5p	MIMAT0004651	Endogenous1	34.45	0.858131	0.537654	-0.320477	0.0486956	0.150395	0.405995	0.281242	0.460608	0.998042	4.36317	4.39163	5.20789	5.04876	6.08108	5.80064	5.28762	5.27463	5.22381	5.38509	5.26266
mmu-miR-341	MIMAT0000588	Endogenous1	58.63	0.0301388	-0.699754	-0.729893	0.952746	0.223109	0.0978648	0.969882	0.535717	0.998042	2.36177	3.09592	4.76022	3.46336	2.98368	3.19849	3.79286	3.8268	2.25096	3.23266	2.67807
mmu-miR-342-3p	MIMAT0000590	Endogenous1	69.1	-1.61546	-1.36715	0.248313	0.00826015	0.00757398	0.648238	0.141674	0.19682	0.998042	7.41456	7.2294	6.25512	6.27109	3.81455	5.0635	5.65535	6.17493	5.83491	5.34873	5.09255
mmu-miR-342-5p	MIMAT0004653	Endogenous1	43.93	-0.418326	-1.44745	-1.02912	0.312476	0.00782657	0.0462762	0.561313	0.19682	0.998042	3.68482	3.80735	4.47119	4.33842	3.13586	3.39094	4.03386	4.06781	3.14241	3.0635	1.67807
mmu-miR-343	MIMAT0004868	Endogenous1	38.27	-0.724047	-0.611579	0.112467	0.0894678	0.23086	0.828553	0.32254	0.539945	0.998042	2.9486	3.09592	3.30159	3.68594	3.13586	2.39232	2.65535	1.95233	1.44361	3.23266	3.26303
mmu-miR-344	MIMAT0000593	Endogenous1	29.64	-0.451741	-0.346296	0.105445	0.296031	0.337324	0.801644	0.545777	0.628044	0.998042	4.23726	4.59096	4.62293	5.20085	4.27352	3.39094	4.72574	4.45483	4.08661	4.52293	4.34056
mmu-miR-345-3p	MIMAT0004656	Endogenous1	71.87	-1.48387	-1.17975	0.304129	0.00774442	0.0326444	0.490455	0.136979	0.257729	0.998042	4.58556	3.63691	5.54905	5.04876	3.62176	2.39232	3.50335	3.36737	3.24945	4.0635	3.26303
mmu-miR-345-5p	MIMAT0000595	Endogenous1	38.47	-0.575972	-0.574821	0.00115187	0.210601	0.167794	0.997753	0.462017	0.479856	0.998042	5.09972	5.12887	4.10852	5.52262	3.81455	4.0917	4.58135	5.06824	4.30012	4.38543	4.48478
mmu-miR-346	MIMAT0000597	Endogenous1	40.57	-0.839599	-0.633437	0.206162	0.0567411	0.119928	0.610089	0.305196	0.446068	0.998042	5.09972	4.02945	4.30086	4.68594	3.27352	3.39094	3.91839	4.17473	3.90207	3.52231	4.26228
mmu-miR-3470a驫miR-3470b	MIMAT0015640	Endogenous1	53.23	-1.14723	-1.12289	0.0243375	0.0349465	0.00645118	0.963733	0.241216	0.19682	0.998042	4.94767	4.68145	4.88606	4.33842	3.39917	3.19849	2.65535	5.01167	3.34908	3.52231	3.90014
mmu-miR-3471	MIMAT0015642	Endogenous1	51.37	-0.525228	0.136718	0.661947	0.334155	0.779721	0.212221	0.573498	0.89156	0.998042	9.02583	7.8268	7.20789	7.44874	6.29002	6.99853	7.88795	8.23185	8.29425	7.45557	8.29228
mmu-miR-3472	MIMAT0015643	Endogenous1	38.23	-0.36198	-0.272306	0.0896736	0.454074	0.521351	0.856329	0.65396	0.770456	0.998042	5.0635	4.44427	3.88557	4.96625	3.27352	3.91456	4.65535	5.06824	3.90207	4.15056	4.90014
mmu-miR-3473	MIMAT0015645	Endogenous1	54.09	0.908015	0.498492	-0.409523	0.0877738	0.392638	0.421059	0.320444	0.681035	0.998042	3.23726	3.33771	5.10852	3.46336	4.39917	4.03474	4.97728	5.36772	3.44228	4.23343	5.17991
mmu-miR-3474	MIMAT0015646	Endogenous1	85.97	-1.14487	-0.66969	0.475184	0.072263	0.288781	0.327472	0.305196	0.593385	0.998042	3.23726	2.80735	5.47086	4.46401	1.81558	2.7137	3.33342	3.5373	2.90111	3.52231	3.55213
mmu-miR-3475	MIMAT0015219	Endogenous1	37.22	-0.807112	-0.395929	0.411183	0.0876086	0.327575	0.407293	0.320444	0.618025	0.998042	3.47897	2.80735	3.62293	3.20006	2.62059	1.38957	2.91839	2.95233	2.44361	2.64847	3.55213
mmu-miR-34a	MIMAT0000542	Endogenous1	16.96	-0.19275	-0.218816	-0.0260663	0.609197	0.504438	0.942366	0.758098	0.75934	0.998042	3.86493	3.5435	4.10852	4.20085	3.51475	3.97636	3.50335	3.95233	3.69042	3.76341	3.67807
mmu-miR-34b-3p	MIMAT0004581	Endogenous1	80.32	-1.31161	-0.357113	0.954498	0.0367325	0.551535	0.0935104	0.241714	0.778981	0.998042	3.23726	2.80735	5.20789	3.87873	1.40054	2.19849	2.91839	3.36737	2.61353	3.76341	3.90014
mmu-miR-34b-5p	MIMAT0000382	Endogenous1	48.85	-0.378889	-0.192915	0.185974	0.54112	0.704724	0.750296	0.712265	0.843285	0.998042	3.0993	1.63691	2.88557	3.87873	0.815575	2.7137	2.91839	3.5373	2.76341	2.38405	2.89918
mmu-miR-34c	MIMAT0000381	Endogenous1	101.53	4.96657	4.16967	-0.7969	0.00321745	0.0350712	0.271714	0.0758781	0.261557	0.998042	6.74376	8.62564	1.29866	0.879706	8.51471	8.15269	10.4691	10.2776	8.8813	7.1822	9.60633
mmu-miR-350	MIMAT0000605	Endogenous1	48.06	-1.35366	-0.911678	0.44198	0.00451501	0.0326868	0.324384	0.0982882	0.257729	0.998042	4.77768	4.59096	4.88606	4.20085	2.98368	3.7126	2.65535	3.6893	4.14323	3.87086	3.09255
mmu-miR-351	MIMAT0000609	Endogenous1	40.03	-0.302516	-0.563502	-0.260986	0.512984	0.240836	0.510153	0.697814	0.544861	0.998042	2.58496	3.5435	4.10852	4.33842	3.81455	2.85	3.33342	3.36737	2.76341	3.0635	3.41414
mmu-miR-361	MIMAT0000704	Endogenous1	26.62	-0.00816829	-0.172977	-0.164809	0.984162	0.653772	0.672019	0.991167	0.8223	0.998042	5.39266	4.84649	5.94486	5.87897	6.04308	5.39129	5.14078	5.45516	5.17033	5.67807	5.17991
mmu-miR-362-3p	MIMAT0004684	Endogenous1	28.7	0.268735	-0.152914	-0.421649	0.513579	0.706811	0.280768	0.697814	0.843998	0.998042	2.77821	3.44493	4.10852	3.20006	3.27352	3.851	3.65535	3.8268	3.14241	3.64847	2.89918
mmu-miR-362-5p	MIMAT0000706	Endogenous1	46.89	-0.911013	-0.449008	0.462006	0.124309	0.351446	0.419385	0.371638	0.633638	0.998042	3.94767	2.63691	4.10852	4.33842	3.51475	2.85	1.33342	3.6893	2.90111	3.23266	3.79286
mmu-miR-363	MIMAT0000708	Endogenous1	75.57	-1.25511	-0.974074	0.281038	0.0672487	0.149007	0.685404	0.305196	0.460608	0.998042	2.36177	2.22342	4.10852	3.87873	2.1375	1.7137	0.333424	3.36737	1.44361	3.38543	1.67807
mmu-miR-365	MIMAT0000711	Endogenous1	49.59	-1.38709	-1.10182	0.285264	0.00305968	0.00504141	0.471855	0.0758781	0.19682	0.998042	5.26978	5.36492	4.88606	5.40259	3.62176	3.7126	3.50335	4.5373	4.14323	4.0635	4.18031
mmu-miR-367	MIMAT0003181	Endogenous1	37.8	-0.153463	-0.323236	-0.169774	0.734182	0.424297	0.740183	0.841189	0.704495	0.998042	5.88655	5.46989	5.62293	5.20085	4.85848	4.60051	5.85699	6.25039	4.65191	5.06307	5.95047
mmu-miR-369-3p	MIMAT0003186	Endogenous1	49.62	-0.780604	-0.906777	-0.126173	0.108779	0.0385804	0.776056	0.344889	0.276412	0.998042	5.33235	4.95884	6.00135	4.68594	3.72137	4.03474	4.97728	5.12267	4.14323	4.45549	4.41481
mmu-miR-369-5p	MIMAT0003185	Endogenous1	52.54	-1.28682	-0.984743	0.302082	0.0220966	0.0262447	0.586672	0.201721	0.248781	0.998042	4.77768	4.33771	4.62293	3.87873	2.40054	2.19849	3.50335	4.36737	3.0268	3.23266	3.9991
mmu-miR-370	MIMAT0001095	Endogenous1	44.17	-0.856907	-0.381199	0.475708	0.0718166	0.398273	0.361638	0.305196	0.681035	0.998042	3.36317	3.5435	4.30086	3.68594	2.62059	1.97453	3.33342	3.5373	2.61353	3.23266	4.18031
mmu-miR-374	MIMAT0003727	Endogenous1	20.94	-0.286147	-0.250509	0.0356381	0.451282	0.45863	0.928472	0.652851	0.720419	0.998042	4.82222	4.99458	5.00135	5.12681	5.17193	4.56133	4.79286	4.27426	4.52982	5.19259	4.48478
mmu-miR-375	MIMAT0000739	Endogenous1	74.43	-2.55574	-1.30129	1.25445	1.68198e-05	0.00241774	0.00717006	0.00238001	0.152574	0.998042	8.38526	8.89905	9.17135	8.90123	6.09972	5.81737	6.26416	6.95268	7.44253	7.58684	7.58444
mmu-miR-376a	MIMAT0000740	Endogenous1	47.95	-0.416098	-0.0580982	0.357999	0.410151	0.914103	0.335024	0.634754	0.95458	0.998042	7.15299	6.54381	8.35628	8.74305	7.36886	6.95338	7.44187	7.36763	7.37321	7.74275	7.80684
mmu-miR-376b	MIMAT0001092	Endogenous1	95.23	2.40214	1.53854	-0.863595	0.000710328	0.0561376	0.242907	0.0402715	0.314108	0.998042	4.47832	4.63691	6.34536	5.63372	7.09972	6.63909	8.65978	8.30428	5.3733	6.58676	8.4763
mmu-miR-376c	MIMAT0003183	Endogenous1	44.92	-0.704785	-0.61392	0.0908657	0.109033	0.153864	0.798544	0.344889	0.465707	0.998042	3.47897	3.63691	4.30086	4.87873	3.51475	3.09085	3.33342	3.5373	3.44228	3.38543	3.55213
mmu-miR-377	MIMAT0000741	Endogenous1	38.26	0.038713	0.0559406	0.0172276	0.934987	0.902384	0.970502	0.956966	0.948028	0.998042	5.77795	6.0798	7.20789	6.90123	6.00405	5.9148	7.19131	7.01156	6.02746	7.09666	6.51885
mmu-miR-378	MIMAT0003151	Endogenous1	29.83	-0.494148	-0.162689	0.331459	0.220173	0.666197	0.37843	0.468235	0.823824	0.998042	8.56255	8.63695	9.57711	9.03873	8.67536	8.15937	8.43667	8.56735	9.01044	8.93053	8.43246
mmu-miR-379	MIMAT0000743	Endogenous1	32.18	-0.24137	-0.12876	0.11261	0.586658	0.75865	0.782863	0.742919	0.874533	0.998042	3.94767	3.44493	4.76022	4.68594	4.51475	3.39094	3.79286	4.17473	3.76447	4.0635	4.41481
mmu-miR-380-3p	MIMAT0000745	Endogenous1	56.52	-1.0012	-0.669755	0.331441	0.0433309	0.167641	0.452173	0.269508	0.479856	0.998042	4.82222	4.68145	6.20789	5.46369	4.20633	3.7126	4.97728	4.27426	4.08661	4.64847	5.13709
mmu-miR-380-5p	MIMAT0000744	Endogenous1	45.14	-1.36971	-0.292351	1.07736	0.0475154	0.43992	0.135002	0.278976	0.713452	0.998042	4.77768	3.63691	4.62293	4.20085	0.815575	2.97636	3.79286	4.17473	3.90207	4.15056	3.9991
mmu-miR-381	MIMAT0000746	Endogenous1	51.12	-1.17849	-1.1357	0.0427812	0.0156756	0.0110148	0.924983	0.163663	0.200961	0.998042	3.86493	3.44493	4.10852	4.33842	2.1375	2.56071	2.65535	3.6893	2.76341	2.38405	3.26303
mmu-miR-382	MIMAT0000747	Endogenous1	68.46	-1.75147	-1.09255	0.658914	0.00147058	0.0234579	0.148495	0.0542239	0.245873	0.998042	3.77821	4.09677	5.10852	4.68594	2.40054	2.39232	2.33342	3.5373	3.69042	2.86987	3.41414
mmu-miR-383	MIMAT0000748	Endogenous1	37.85	-0.220984	-0.25124	-0.0302567	0.631602	0.57055	0.942517	0.771372	0.785721	0.998042	2.77821	3.5435	4.47119	3.68594	3.27352	2.7137	3.65535	3.95233	3.24945	3.76341	3.09255
mmu-miR-384-3p	MIMAT0001076	Endogenous1	65.51	-1.12395	-0.538012	0.585938	0.0520827	0.325136	0.303677	0.296188	0.615475	0.998042	3.0993	2.80735	4.62293	3.68594	2.1375	1.38957	2.65535	3.5373	2.76341	2.38405	3.90014
mmu-miR-384-5p	MIMAT0004745	Endogenous1	47.08	-0.13378	0.129539	0.263319	0.828436	0.829495	0.623769	0.898929	0.907593	0.998042	1.36177	3.22188	3.88557	3.68594	2.62059	1.7137	3.33342	3.95233	2.76341	3.0635	3.67807
mmu-miR-409-3p	MIMAT0001090	Endogenous1	91.67	0.552064	-0.27233	-0.824393	0.452151	0.744823	0.0582502	0.652851	0.862912	0.998042	0.773996	1.22033	4.76022	2.87971	3.13586	2.19849	3.33342	3.17473	2.25096	2.0635	2.09424
mmu-miR-409-5p	MIMAT0004746	Endogenous1	51.64	-0.766513	-0.309539	0.456974	0.186778	0.519923	0.395542	0.434274	0.770456	0.998042	3.77821	3.72465	5.10852	5.27128	2.98368	2.7137	4.50335	4.61589	4.19771	3.87086	4.41481
mmu-miR-410	MIMAT0001091	Endogenous1	32.59	-0.793458	-0.433315	0.360143	0.0718498	0.229497	0.396752	0.305196	0.539945	0.998042	5.50589	5.41819	6.05593	6.04876	5.09972	4.14568	5.28762	5.32193	4.99729	5.45549	5.51885
mmu-miR-411	MIMAT0004747	Endogenous1	50.8	-0.397541	-1.06622	-0.668678	0.450564	0.0416502	0.230224	0.652851	0.277341	0.998042	3.68482	3.44493	4.62293	4.78555	3.98459	2.39232	4.50335	4.06781	3.14241	3.64847	2.41414
mmu-miR-412	MIMAT0001094	Endogenous1	58.68	-1.5771	-1.0689	0.508201	0.0237133	0.0214965	0.464513	0.202452	0.231755	0.998042	3.77821	4.09677	3.62293	2.87971	0	2.19849	3.50335	2.36737	2.02857	2.86987	2.67807
mmu-miR-421	MIMAT0004869	Endogenous1	55.55	-0.586865	-0.761342	-0.174478	0.24991	0.125129	0.718213	0.499819	0.446068	0.998042	4.82222	4.99458	6.43029	5.57924	4.06178	4.63923	4.91839	5.85947	4.30012	4.52293	5.26266
mmu-miR-423-3p	MIMAT0003454	Endogenous1	27.61	-0.273968	-0.161726	0.112242	0.510523	0.644375	0.779629	0.697814	0.819587	0.998042	4.94767	4.99458	5.82451	5.20085	4.51475	4.60051	5.58135	5.17513	5.05702	5.23304	4.95047
mmu-miR-423-5p	MIMAT0004825	Endogenous1	28.31	0.0539217	-0.242728	-0.29665	0.893132	0.483732	0.484464	0.933669	0.741338	0.998042	4.77768	5.28096	4.76022	4.96625	4.45812	4.78346	5.69098	5.06824	4.30012	4.76394	5.04658
mmu-miR-425	MIMAT0004750	Endogenous1	21.11	-0.406592	-0.124873	0.28172	0.292972	0.700311	0.455548	0.541903	0.843285	0.998042	6.37782	6.95884	6.47086	6.68622	5.98413	6.03496	6.14078	6.7075	6.68089	6.45549	6.35931
mmu-miR-429	MIMAT0001537	Endogenous1	44.2	0.279539	-0.257868	-0.537407	0.539659	0.531628	0.289499	0.712265	0.77552	0.998042	11.4649	11.6724	10.8632	10.9123	12.4327	11.7757	10.803	11.0196	11.2675	11.3886	10.255
mmu-miR-431	MIMAT0001418	Endogenous1	49.91	-1.00633	-0.693996	0.312334	0.0870208	0.0776156	0.614564	0.320444	0.361276	0.998042	4.42156	4.39163	4.76022	4.04876	2.1375	2.7137	3.79286	4.9528	3.34908	4.23343	3.55213
mmu-miR-432	MIMAT0012771	Endogenous1	46.25	-0.924909	-0.597137	0.327772	0.0883202	0.129723	0.538898	0.320444	0.446068	0.998042	5.53294	4.80684	5.47086	4.57954	3.13586	3.63923	4.50335	5.4121	4.65191	4.23343	4.61589
mmu-miR-433	MIMAT0001420	Endogenous1	46.67	-1.31716	-0.828409	0.488749	0.015068	0.0247963	0.345508	0.163663	0.246223	0.998042	5.33235	4.9222	5.54905	5.12681	2.81352	3.63923	4.14078	5.06824	4.34908	4.52293	4.34056
mmu-miR-434-3p	MIMAT0001422	Endogenous1	37.57	-1.0524	-0.594926	0.457469	0.0336603	0.0841891	0.345138	0.238343	0.369388	0.998042	4.90737	4.9222	4.47119	4.57954	2.62059	3.47897	4.03386	4.5373	4.14323	3.96993	4.26228
mmu-miR-434-5p	MIMAT0001421	Endogenous1	56.41	-1.53644	-1.21127	0.325178	0.00162863	0.00409732	0.416793	0.0542239	0.178391	0.998042	4.77768	4.22188	4.88606	4.33842	2.62059	2.85	2.91839	3.6893	3.24945	3.23266	3.55213
mmu-miR-448	MIMAT0001533	Endogenous1	27.56	-0.479098	-0.229179	0.249919	0.213095	0.554031	0.527025	0.464181	0.778981	0.998042	2.9486	2.95977	3.62293	3.46336	2.62059	2.85	2.65535	2.95233	2.44361	3.52231	3.09255
mmu-miR-449a	MIMAT0001542	Endogenous1	58.54	-1.19742	0.482276	1.6797	0.0448017	0.340605	0.00849138	0.275628	0.629918	0.998042	1.36177	2.44361	2.88557	3.20006	1.40054	0	1.33342	2.36737	2.44361	3.52231	2.89918
mmu-miR-449b	MIMAT0005447	Endogenous1	61.79	-0.339031	-0.672623	-0.333592	0.566686	0.250921	0.545352	0.730686	0.556946	0.998042	2.58496	2.80735	4.62293	4.20085	2.40054	2.39232	3.79286	4.27426	2.44361	2.64847	3.55213
mmu-miR-449c	MIMAT0003460	Endogenous1	56.54	0.151266	0.091173	-0.0600934	0.80426	0.892371	0.894794	0.892157	0.944078	0.998042	2.9486	2.44361	4.10852	0.879706	2.1375	2.39232	2.91839	3.5373	2.90111	3.0635	2.09424
mmu-miR-450a-3p	MIMAT0004789	Endogenous1	58.23	-0.313336	-0.290593	0.0227434	0.576587	0.601281	0.963504	0.738344	0.798885	0.998042	2.58496	1.95977	4.30086	3.20006	2.40054	1.7137	3.14078	3.5373	2.25096	2.64847	3.26303
mmu-miR-450a-5p	MIMAT0001546	Endogenous1	43.34	-0.821324	0.0252116	0.846536	0.147846	0.951579	0.14114	0.400387	0.973949	0.998042	3.68482	3.09592	4.47119	4.33842	2.98368	1.7137	3.33342	4.27426	3.61235	4.0635	4.09255
mmu-miR-450b-3p	MIMAT0003512	Endogenous1	63.48	-0.938692	-0.913174	0.0255187	0.0689193	0.112549	0.956105	0.305196	0.436319	0.998042	4.02591	3.63691	4.88606	5.52262	3.98459	2.85	3.65535	3.8268	2.76341	4.15056	3.90014
mmu-miR-450b-5p	MIMAT0003511	Endogenous1	63.46	-0.463082	-0.767149	-0.304067	0.368558	0.221272	0.477056	0.607713	0.535717	0.998042	3.23726	2.80735	5.10852	4.46401	3.27352	3.29866	3.50335	3.6893	2.76341	3.96993	2.67807
mmu-miR-451	MIMAT0001632	Endogenous1	47.19	0.572438	-0.23152	-0.803958	0.261372	0.558882	0.121739	0.507293	0.778981	0.998042	5.09972	5.30925	6.25512	6.08831	6.73308	6.77492	6.58135	4.9528	5.65191	5.23304	5.48478
mmu-miR-452	MIMAT0001637	Endogenous1	71.18	-0.665068	-1.8366	-1.17153	0.173417	0.0152674	0.0405154	0.428621	0.200961	0.998042	3.47897	3.22188	4.62293	5.12681	3.39917	3.19849	3.50335	3.6893	1.02857	3.38543	2.41414
mmu-miR-453	MIMAT0004870	Endogenous1	36.1	-0.821405	-0.291966	0.529439	0.0594805	0.443519	0.189672	0.305196	0.713625	0.998042	2.9486	3.22188	3.88557	3.87873	2.62059	2.19849	3.14078	2.6893	3.44228	2.86987	3.26303
mmu-miR-455	MIMAT0003742	Endogenous1	45.15	-0.419119	-0.701347	-0.282228	0.435129	0.0978889	0.627016	0.642366	0.403033	0.998042	4.23726	4.39163	5.10852	4.96625	2.81352	4.03474	4.85699	5.32193	4.19771	3.38543	4.34056
mmu-miR-463	MIMAT0004758	Endogenous1	51.15	-1.2607	-0.699267	0.561432	0.0124008	0.0960509	0.202279	0.152705	0.403033	0.998042	4.73227	4.22188	5.38853	5.33842	3.39917	3.19849	3.50335	4.5373	4.02768	4.15056	4.48478
mmu-miR-464	MIMAT0002105	Endogenous1	37.31	-0.561641	-0.610035	-0.048394	0.231097	0.100225	0.922923	0.48266	0.403033	0.998042	4.02591	4.16027	4.30086	3.87873	2.81352	2.85	3.91839	4.5373	3.96625	3.38543	3.09255
mmu-miR-465a-3p	MIMAT0004217	Endogenous1	61.18	-0.745779	-0.158043	0.587736	0.27811	0.845526	0.381701	0.530001	0.908568	0.998042	3.23726	0.641546	3.30159	3.68594	0.815575	1.97453	1.91839	3.17473	3.34908	1.0635	3.26303
mmu-miR-465a-5p	MIMAT0002106	Endogenous1	52.53	-0.691368	-0.523966	0.167402	0.2053	0.296692	0.755421	0.455685	0.593385	0.998042	3.77821	3.09592	4.88606	4.04876	2.1375	2.97636	4.24031	3.6893	2.76341	3.52231	3.9991
mmu-miR-465b-5p	MIMAT0004871	Endogenous1	41.34	-0.295661	0.169067	0.464728	0.553587	0.729511	0.347654	0.722368	0.856882	0.998042	3.36317	3.8846	4.76022	4.96625	3.98459	2.97636	4.14078	4.68986	3.76447	4.52293	4.95047
mmu-miR-465c-5p	MIMAT0004873	Endogenous1	39.2	-0.0115243	-0.323784	-0.31226	0.980134	0.45628	0.505116	0.98887	0.720419	0.998042	3.94767	3.5435	4.88606	4.46401	3.62176	3.63923	4.58135	4.9528	3.34908	3.96993	4.34056
mmu-miR-466a-3p驫miR-466b-3-3p	MIMAT0002107	Endogenous1	37.94	-0.525851	-0.333624	0.192227	0.263144	0.420488	0.669963	0.507293	0.702054	0.998042	4.30159	4.44427	5.30086	5.40259	3.90207	3.63923	4.97728	4.82731	4.2502	4.38543	4.95047
mmu-miR-466a-5p驫miR-466e-5p	MIMAT0004759	Endogenous1	37.68	-0.688787	-0.533682	0.155106	0.117675	0.20645	0.72349	0.356234	0.517037	0.998042	6.02591	5.61412	6.47086	5.46369	5.0237	4.56133	5.58135	5.65306	4.72792	5.73579	5.61618
mmu-miR-466c-5p	MIMAT0004877	Endogenous1	46.95	-0.236005	0.0827833	0.318788	0.71059	0.838147	0.653096	0.821539	0.907811	0.998042	3.68482	4.28096	3.88557	3.20006	1.40054	3.63923	4.24031	4.82731	3.52982	3.52231	4.48478
mmu-miR-466d-3p	MIMAT0004931	Endogenous1	42.81	-0.682429	-0.313403	0.369026	0.220214	0.431232	0.504168	0.468235	0.710158	0.998042	5.53294	4.39163	5.30086	4.46401	2.98368	3.7126	5.14078	5.12267	4.44228	4.70708	4.67751
mmu-miR-466d-5p	MIMAT0004930	Endogenous1	65.1	-1.43274	-0.655458	0.777279	0.0124106	0.181342	0.142393	0.152705	0.48565	0.998042	3.68482	3.95884	5.30086	4.33842	1.81558	2.7137	3.33342	3.6893	3.0268	3.96993	3.9991
mmu-miR-466f-5p	MIMAT0004881	Endogenous1	88.13	-0.361999	-1.06347	-0.701471	0.522011	0.168081	0.202866	0.705481	0.479856	0.998042	2.10098	2.80735	5.00135	3.20006	2.98368	2.39232	3.33342	2.95233	1.44361	1.64616	3.55213
mmu-miR-466g	MIMAT0004883	Endogenous1	68.73	0.976427	0.661294	-0.315133	0.0729967	0.321377	0.619585	0.305196	0.615475	0.998042	7.03529	7.26632	8.53939	8.44112	8.50426	7.82998	9.50579	9.3478	7.34332	8.14537	9.95678
mmu-miR-466h	MIMAT0004884	Endogenous1	77.6	0.313378	0.380173	0.0667946	0.541009	0.60096	0.919416	0.712265	0.798885	0.998042	3.47897	3.80735	5.10852	5.12681	4.45812	3.851	5.24031	5.22574	3.61235	4.15056	6.51885
mmu-miR-466i	MIMAT0005834	Endogenous1	67	-0.464439	-0.752856	-0.288417	0.444171	0.170314	0.62056	0.650267	0.479856	0.998042	3.0993	2.95977	3.62293	4.96625	2.98368	1.7137	3.91839	4.17473	2.44361	2.86987	3.41414
mmu-miR-466j	MIMAT0005848	Endogenous1	38.56	-0.438842	-0.787982	-0.34914	0.319869	0.0511385	0.432555	0.565768	0.304845	0.998042	3.86493	4.02945	4.10852	4.78555	2.98368	3.56071	4.03386	4.45483	3.0268	3.64847	3.55213
mmu-miR-466k	MIMAT0005845	Endogenous1	40.75	-0.962143	-0.597567	0.364576	0.0622096	0.0993013	0.479655	0.305196	0.403033	0.998042	5.23726	4.95884	5.54905	4.87873	3.13586	3.78346	4.58135	5.27463	4.44228	4.38543	4.8475
mmu-miR-466l	MIMAT0005830	Endogenous1	43.54	-0.0998179	0.278161	0.377979	0.876375	0.658681	0.468594	0.928078	0.823556	0.998042	4.02591	3.8846	1.29866	3.46336	1.81558	2.85	3.65535	3.95233	3.69042	3.38543	3.26303
mmu-miR-467a	MIMAT0003409	Endogenous1	41.32	-0.961269	-0.245603	0.715666	0.114401	0.526807	0.265863	0.355223	0.773007	0.998042	4.36317	3.8846	5.00135	4.57954	3.39917	1.7137	4.33342	4.5373	3.76447	4.38543	4.48478
mmu-miR-467b	MIMAT0005448	Endogenous1	41.45	0.234045	0.227032	-0.00701245	0.633965	0.648785	0.98853	0.771372	0.820782	0.998042	3.36317	3.5435	5.00135	4.20085	4.27352	3.29866	4.85699	4.61589	3.52982	4.38543	4.8475
mmu-miR-467c	MIMAT0004885	Endogenous1	51.14	0.453703	0.0400455	-0.413658	0.38047	0.941152	0.454381	0.618811	0.970295	0.998042	3.77821	4.09677	5.00135	5.40259	4.56925	4.14568	5.72574	5.65306	3.90207	4.31107	5.61618
mmu-miR-467d	MIMAT0004886	Endogenous1	65.14	-0.565948	-0.400212	0.165736	0.347993	0.551387	0.7408	0.587142	0.778981	0.998042	3.0993	1.95977	4.76022	4.20085	2.62059	2.85	3.91839	2.36737	2.25096	3.38543	3.67807
mmu-miR-467e	MIMAT0005293	Endogenous1	47.81	-1.17697	-0.737255	0.439713	0.0159037	0.0738564	0.335841	0.163663	0.361276	0.998042	4.90737	4.99458	5.82451	5.40259	3.51475	3.97636	3.91839	5.01167	4.83491	4.0635	4.7366
mmu-miR-467f	MIMAT0005846	Endogenous1	100.27	1.43384	1.10498	-0.328859	0.00764425	0.145995	0.670767	0.136979	0.460608	0.998042	6.00675	5.92244	6.38836	6.08831	7.11801	6.48913	8.40484	8.12923	5.63227	6.7498	9.23726
mmu-miR-467g	MIMAT0005854	Endogenous1	49.51	-1.03289	-0.436838	0.596055	0.0584864	0.305709	0.242756	0.305196	0.605005	0.998042	4.68482	4.16027	3.62293	3.20006	1.81558	2.56071	3.33342	3.8268	3.52982	3.23266	3.67807
mmu-miR-467h驫miR-669d驫miR-669l	MIMAT0005855	Endogenous1	142.11	-0.389384	-0.896293	-0.50691	0.63869	0.349902	0.48622	0.771372	0.633638	0.998042	1.36177	1.22033	4.76022	0.879706	0.815575	0.978196	1.33342	3.5373	0	1.0635	2.41414
mmu-miR-468	MIMAT0002109	Endogenous1	67.45	1.79598	1.64806	-0.147915	0.0020479	0.0205945	0.764347	0.0622076	0.231755	0.998042	2.36177	2.80735	3.62293	4.46401	4.81404	4.88313	5.42089	5.32193	4.08661	4.70708	6.09255
mmu-miR-469	MIMAT0002110	Endogenous1	79.7	-0.894741	-1.7378	-0.843063	0.162945	0.00824985	0.184881	0.409897	0.19682	0.998042	3.58496	1.95977	4.10852	2.87971	1.81558	0.978196	3.79286	2.36737	1.02857	1.0635	2.09424
mmu-miR-470	MIMAT0002111	Endogenous1	51.99	-0.675663	-0.632341	0.0433219	0.182213	0.2276	0.92609	0.431517	0.539002	0.998042	4.16993	3.80735	5.47086	5.20085	3.51475	3.39094	4.50335	4.5373	3.44228	3.96993	4.67751
mmu-miR-471	MIMAT0002112	Endogenous1	51.16	-0.47911	-0.8647	-0.38559	0.30557	0.0852513	0.315109	0.556118	0.371171	0.998042	3.47897	3.44493	5.00135	4.68594	3.81455	3.47897	3.33342	4.06781	3.24945	3.52231	3.09255
mmu-miR-483	MIMAT0004782	Endogenous1	42.79	-0.974049	-0.913065	0.0609835	0.0284596	0.0321324	0.883765	0.21781	0.257729	0.998042	4.68482	4.22188	5.00135	5.04876	3.27352	3.47897	4.24031	4.06781	4.30012	3.38543	3.79286
mmu-miR-484	MIMAT0003127	Endogenous1	34.63	-0.900776	-0.571684	0.329092	0.0589336	0.100272	0.486567	0.305196	0.403033	0.998042	5.09972	4.63691	5.10852	4.87873	2.98368	3.97636	4.33342	4.82731	4.52982	4.45549	4.09255
mmu-miR-485	MIMAT0003128	Endogenous1	59.47	-0.456105	-0.316364	0.139741	0.474058	0.587451	0.808776	0.667895	0.79333	0.998042	2.58496	3.22188	5.00135	4.33842	1.81558	3.19849	4.24031	4.06781	3.0268	3.96993	3.41414
mmu-miR-486	MIMAT0003130	Endogenous1	28.15	0.194954	-0.381554	-0.576508	0.627207	0.308537	0.157134	0.768396	0.605653	0.998042	4.36317	3.63691	4.62293	4.20085	4.27352	3.91456	4.72574	4.68986	3.52982	4.15056	3.79286
mmu-miR-487b	MIMAT0003184	Endogenous1	62.58	-1.26295	-0.718259	0.544694	0.0249629	0.145818	0.276813	0.204479	0.460608	0.998042	3.36317	2.63691	3.62293	4.46401	1.81558	1.38957	3.14078	2.6893	2.76341	2.38405	3.26303
mmu-miR-488	MIMAT0003450	Endogenous1	45.09	-0.469786	-0.508691	-0.0389055	0.356121	0.272511	0.931844	0.591098	0.583693	0.998042	3.36317	3.44493	4.76022	4.68594	3.62176	2.56071	4.24031	3.95233	3.34908	3.76341	3.55213
mmu-miR-489	MIMAT0003112	Endogenous1	41.48	0.107167	-0.143052	-0.250219	0.829047	0.789111	0.539785	0.898929	0.895797	0.998042	5.70874	5.28096	7.25522	6.98743	6.79155	5.94579	6.67327	6.25039	5.81762	6.67793	5.99955
mmu-miR-490	MIMAT0003780	Endogenous1	44.61	-1.21684	-0.483633	0.733208	0.0264347	0.17553	0.179883	0.207806	0.479856	0.998042	4.10014	3.5435	3.88557	4.33842	1.81558	2.19849	2.91839	4.06781	3.24945	3.52231	3.67807
mmu-miR-491	MIMAT0003486	Endogenous1	58.97	-0.442772	-0.136109	0.306663	0.527902	0.83583	0.624775	0.709721	0.907811	0.998042	3.94767	3.72465	1.29866	3.87873	1.40054	2.39232	2.91839	4.36737	2.44361	3.52231	3.26303
mmu-miR-493	MIMAT0004888	Endogenous1	51.61	-0.411239	-0.131749	0.27949	0.398187	0.793515	0.643184	0.627743	0.895797	0.998042	3.58496	3.5435	3.88557	4.33842	2.62059	2.7137	4.42089	3.95233	3.34908	2.86987	4.90014
mmu-miR-494	MIMAT0003182	Endogenous1	41.17	0.508388	0.218147	-0.290241	0.303767	0.69286	0.538497	0.554619	0.843285	0.998042	5.23726	5.28096	6.69335	6.80954	7.09043	5.93026	6.39951	6.63445	5.34944	6.87061	6.45022
mmu-miR-495	MIMAT0003456	Endogenous1	41.37	-0.596003	-0.667178	-0.0711757	0.175053	0.133826	0.870455	0.429152	0.44921	0.998042	4.02591	4.28096	4.47119	5.20085	4.27352	3.29866	4.33342	3.6893	3.34908	4.45549	3.67807
mmu-miR-496	MIMAT0003738	Endogenous1	29.4	-0.334583	-0.284232	0.0503508	0.421072	0.471324	0.899953	0.637606	0.732759	0.998042	5.63575	6.16048	6.82451	6.23649	6.06221	5.27389	6.11478	6.06803	5.48704	6.23324	6.06996
mmu-miR-497	MIMAT0003453	Endogenous1	39.61	-0.197789	-0.100794	0.0969953	0.688211	0.826751	0.840586	0.809829	0.907593	0.998042	2.9486	3.44493	4.47119	4.20085	2.62059	4.14568	3.33342	4.17473	3.34908	3.38543	4.26228
mmu-miR-499	MIMAT0003482	Endogenous1	60.15	-0.491923	0.0152806	0.507204	0.351602	0.977825	0.293615	0.589994	0.98941	0.998042	2.9486	3.44493	5.10852	3.46336	2.62059	3.39094	2.91839	4.06781	3.0268	4.15056	4.09255
mmu-miR-500	MIMAT0003507	Endogenous1	58.18	-0.660059	-0.771137	-0.111078	0.258537	0.146397	0.842134	0.507293	0.460608	0.998042	3.94767	2.95977	5.00135	4.20085	2.40054	2.56071	4.14078	4.36737	3.44228	3.64847	2.67807
mmu-miR-501-3p	MIMAT0003509	Endogenous1	63.71	-0.821802	-0.56599	0.255812	0.181124	0.43287	0.704622	0.430741	0.710158	0.998042	3.23726	2.44361	4.47119	4.57954	2.40054	1.7137	3.50335	3.8268	3.44228	1.64616	4.26228
mmu-miR-501-5p	MIMAT0003508	Endogenous1	48.95	-0.391077	-0.737782	-0.346705	0.392148	0.128024	0.440575	0.624889	0.446068	0.998042	3.47897	3.44493	4.76022	3.46336	2.81352	3.19849	3.50335	4.06781	3.34908	2.38405	3.41414
mmu-miR-503	MIMAT0003188	Endogenous1	61.61	-0.398986	-0.567175	-0.168189	0.507218	0.284909	0.785845	0.697814	0.593385	0.998042	2.9486	2.63691	4.47119	3.20006	1.81558	1.97453	3.91839	3.95233	2.76341	2.0635	3.41414
mmu-miR-504	MIMAT0004889	Endogenous1	94.94	-1.44217	-1.31497	0.127209	0.0425641	0.0946053	0.813557	0.269508	0.403033	0.998042	1.77821	3.33771	4.88606	4.57954	2.1375	1.38957	1.91839	3.36737	1.44361	2.64847	2.89918
mmu-miR-505	MIMAT0003513	Endogenous1	48.24	-1.10618	-0.801334	0.304847	0.0686176	0.0706245	0.643243	0.305196	0.353747	0.998042	4.68482	4.28096	5.00135	4.57954	1.81558	3.56071	3.79286	4.9528	4.02768	3.0635	4.41481
mmu-miR-509-3p	MIMAT0004891	Endogenous1	34.8	-0.119828	-0.06196	0.0578682	0.793084	0.888494	0.88097	0.885376	0.941737	0.998042	3.47897	2.95977	4.10852	4.68594	3.98459	3.56071	3.14078	4.06781	3.69042	3.64847	3.90014
mmu-miR-509-5p	MIMAT0004890	Endogenous1	42.05	-0.889727	-0.532253	0.357474	0.087241	0.172984	0.486592	0.320444	0.479856	0.998042	4.94767	4.09677	4.62293	5.12681	2.98368	3.09085	4.33342	4.82731	4.14323	3.87086	4.48478
mmu-miR-511	MIMAT0004940	Endogenous1	47.12	-0.3203	-0.447665	-0.127365	0.509756	0.380543	0.784233	0.697814	0.670426	0.998042	3.36317	3.22188	4.88606	4.20085	2.98368	3.19849	4.03386	4.17473	2.76341	3.64847	3.9991
mmu-miR-532-3p	MIMAT0004781	Endogenous1	55.27	-0.790406	-0.394207	0.396199	0.157932	0.451492	0.495446	0.409897	0.719654	0.998042	3.0993	2.80735	3.62293	4.46401	1.40054	2.56071	3.33342	3.5373	2.44361	2.86987	3.9991
mmu-miR-532-5p	MIMAT0002889	Endogenous1	24.68	-0.274752	-0.187044	0.0877073	0.48444	0.595766	0.807973	0.673693	0.797172	0.998042	5.02591	5.02945	5.88606	5.04876	4.94345	4.63923	5.03386	5.27463	5.02724	5.10769	5.04658
mmu-miR-539	MIMAT0003169	Endogenous1	40.91	0.0220967	-0.299188	-0.321285	0.96323	0.541058	0.494273	0.978309	0.778981	0.998042	5.90713	5.59126	6.97338	7.04876	6.04308	5.71315	6.97728	6.87541	5.48704	6.06329	6.69251
mmu-miR-540-3p	MIMAT0003167	Endogenous1	46.99	0.36162	0.347431	-0.0141891	0.535659	0.585173	0.971797	0.712265	0.79333	0.998042	2.9486	2.22342	4.30086	5.04876	4.06178	3.29866	4.24031	4.36737	3.69042	4.15056	4.09255
mmu-miR-540-5p	MIMAT0004786	Endogenous1	76.24	-0.653621	-1.0103	-0.356683	0.279289	0.13672	0.44109	0.530463	0.452535	0.998042	3.77821	3.44493	5.88606	5.63372	4.13586	3.19849	4.03386	4.76022	3.52982	4.23343	3.26303
mmu-miR-541	MIMAT0003170	Endogenous1	50.03	-1.1166	-1.06291	0.0536892	0.0585996	0.0119714	0.927436	0.305196	0.200961	0.998042	5.23726	4.88509	4.30086	4.96625	2.1375	3.56071	4.33342	4.89142	3.61235	3.64847	4.09255
mmu-miR-542-3p	MIMAT0003172	Endogenous1	50.69	-0.32603	0.0430557	0.369086	0.556453	0.939581	0.472102	0.722368	0.970295	0.998042	2.58496	1.95977	4.10852	3.68594	2.62059	1.7137	3.33342	3.36737	2.61353	3.87086	2.89918
mmu-miR-542-5p	MIMAT0003171	Endogenous1	52.14	-0.237054	-0.170498	0.0665565	0.696991	0.740573	0.913627	0.815076	0.862912	0.998042	2.10098	2.95977	4.10852	3.46336	1.40054	2.56071	3.65535	4.06781	3.0268	2.38405	3.55213
mmu-miR-543	MIMAT0003168	Endogenous1	37	-0.369392	-0.493193	-0.123801	0.385656	0.245053	0.727586	0.620117	0.547259	0.998042	0	0	1.29866	0.879706	0	0	0.333424	0.367371	0	0.0565835	0.0976108
mmu-miR-544	MIMAT0004941	Endogenous1	40.98	-0.0796011	-0.138419	-0.0588183	0.858197	0.787248	0.899664	0.919961	0.895797	0.998042	3.77821	3.63691	5.10852	4.57954	3.81455	3.851	4.50335	4.61589	3.34908	4.0635	4.99955
mmu-miR-546	MIMAT0003166	Endogenous1	37.68	-0.560845	-0.202404	0.358441	0.242955	0.639755	0.506812	0.496435	0.815544	0.998042	2.77821	3.09592	3.62293	2.87971	3.39917	1.38957	2.65535	2.6893	2.02857	3.23266	3.41414
mmu-miR-547	MIMAT0003173	Endogenous1	47.91	-0.389068	-0.952627	-0.563559	0.389189	0.0670655	0.192836	0.622262	0.341974	0.998042	4.23726	4.44427	5.38853	5.73688	4.67243	4.14568	4.42089	5.01167	3.34908	4.23343	4.41481
mmu-miR-551b	MIMAT0003890	Endogenous1	48.17	-0.426546	-0.262576	0.16397	0.369352	0.5604	0.682526	0.607713	0.778981	0.998042	3.36317	2.80735	4.47119	2.87971	2.62059	2.85	2.65535	3.6893	3.0268	3.0635	3.26303
mmu-miR-568	MIMAT0004892	Endogenous1	27.91	-0.052254	0.153923	0.206177	0.901713	0.664436	0.641896	0.936458	0.823824	0.998042	3.36317	3.5435	3.88557	4.04876	3.62176	2.85	3.79286	4.36737	3.44228	3.96993	4.18031
mmu-miR-574-3p	MIMAT0004894	Endogenous1	46.79	-0.878942	-0.951307	-0.0723652	0.0463015	0.0257545	0.850529	0.278976	0.248781	0.998042	4.10014	4.28096	5.20789	4.57954	3.13586	4.03474	3.65535	3.8268	3.83491	3.38543	3.55213
mmu-miR-574-5p	MIMAT0004893	Endogenous1	76.3	1.69696	1.19905	-0.497915	0.0116846	0.176491	0.460787	0.152705	0.479856	0.998042	3.58496	3.95884	6.20789	5.68622	6.33789	5.80064	6.99164	7.09561	4.44228	6.06329	7.67002
mmu-miR-582-3p	MIMAT0005292	Endogenous1	43.37	-0.502093	-0.112957	0.389136	0.255029	0.811639	0.328428	0.506012	0.902529	0.998042	4.02591	3.33771	5.10852	4.20085	3.62176	3.56071	3.65535	3.8268	4.02768	3.52231	4.61589
mmu-miR-582-5p	MIMAT0005291	Endogenous1	63.77	-0.843536	-0.798188	0.0453484	0.0780628	0.177191	0.922677	0.313359	0.479856	0.998042	2.9486	3.5435	4.62293	2.87971	2.62059	2.39232	2.65535	2.95233	2.90111	3.52231	1.67807
mmu-miR-590-3p	MIMAT0004896	Endogenous1	46.83	-0.234134	-0.629818	-0.395684	0.647351	0.138572	0.475474	0.77792	0.455999	0.998042	2.58496	2.22342	3.30159	2.87971	1.40054	1.97453	3.14078	3.5373	2.02857	1.64616	2.67807
mmu-miR-590-5p	MIMAT0004895	Endogenous1	85.91	-0.769093	-2.21824	-1.44915	0.220214	0.0103943	0.045805	0.468235	0.200961	0.998042	2.36177	3.22188	4.88606	4.20085	2.1375	1.97453	3.79286	3.6893	2.61353	0.0565835	1.67807
mmu-miR-592	MIMAT0003730	Endogenous1	60.25	-0.421509	0.00842803	0.429937	0.483889	0.987893	0.415534	0.673693	0.99053	0.998042	3.0993	3.33771	5.38853	4.46401	2.62059	3.29866	3.79286	4.89142	3.76447	4.38543	4.09255
mmu-miR-599	MIMAT0012772	Endogenous1	43.81	-0.678295	-0.605036	0.0732593	0.156455	0.148369	0.86486	0.409897	0.460608	0.998042	3.36317	3.09592	4.30086	4.20085	2.40054	2.97636	2.91839	3.95233	3.24945	3.0635	3.09255
mmu-miR-615-3p	MIMAT0003783	Endogenous1	48.58	-0.814745	-0.860114	-0.045369	0.0645203	0.0832628	0.914888	0.305196	0.369388	0.998042	4.02591	3.33771	4.76022	4.04876	3.62176	2.97636	3.14078	3.17473	2.90111	3.96993	2.67807
mmu-miR-615-5p	MIMAT0004837	Endogenous1	68.29	-0.0816808	-0.370709	-0.289028	0.90116	0.633304	0.506827	0.936458	0.815286	0.998042	0	1.63691	3.62293	2.87971	2.1375	1.97453	1.33342	2.36737	2.25096	1.0635	1.67807
mmu-miR-652	MIMAT0003711	Endogenous1	22.82	-0.0649994	-0.162367	-0.0973672	0.867228	0.615598	0.809517	0.922652	0.806376	0.998042	5.45022	5.44427	5.62293	5.27128	5.2407	4.91456	5.33342	6.04002	4.99729	5.27277	5.58436
mmu-miR-653	MIMAT0004943	Endogenous1	46.77	-0.587733	-0.409129	0.178604	0.228277	0.397691	0.664173	0.478536	0.681035	0.998042	4.16993	3.5435	5.00135	5.33842	3.81455	3.47897	3.79286	4.61589	3.76447	4.45549	4.09255
mmu-miR-654-3p	MIMAT0004898	Endogenous1	39.5	-0.850689	-0.774237	0.0764521	0.0599316	0.0605271	0.864675	0.305196	0.323192	0.998042	5.39266	4.99458	5.82451	5.52262	3.90207	4.29793	4.85699	5.27463	4.69042	4.15056	5.13709
mmu-miR-654-5p	MIMAT0004897	Endogenous1	71	-0.97654	-0.68565	0.29089	0.102057	0.22432	0.640248	0.338065	0.535717	0.998042	2.36177	2.44361	2.30159	3.87873	1.40054	0.978196	1.33342	3.36737	1.44361	1.64616	3.09255
mmu-miR-664	MIMAT0012774	Endogenous1	43.24	0.738561	0.648204	-0.090357	0.155008	0.28253	0.844232	0.409244	0.593385	0.998042	4.23726	3.8846	5.76049	5.68622	5.81429	5.03518	5.94813	5.7252	4.69042	5.64818	6.28244
mmu-miR-665	MIMAT0003733	Endogenous1	46.45	-1.00192	-0.401456	0.60046	0.084619	0.274742	0.331642	0.317181	0.5846	0.998042	4.63575	4.28096	4.76022	4.96625	2.40054	3.09085	3.91839	5.22574	4.52982	3.76341	4.48478
mmu-miR-666-3p	MIMAT0004823	Endogenous1	40.73	-0.789554	-0.553163	0.236391	0.100604	0.161191	0.622402	0.338065	0.475561	0.998042	3.77821	3.80735	4.62293	3.87873	2.81352	2.39232	3.65535	4.06781	3.44228	3.0635	3.90014
mmu-miR-666-5p	MIMAT0003737	Endogenous1	57.96	-0.829328	-0.68178	0.147548	0.105498	0.175921	0.727305	0.344889	0.479856	0.998042	2.77821	2.80735	3.88557	4.46401	2.62059	1.97453	3.33342	2.6893	2.44361	2.86987	3.09255
mmu-miR-667	MIMAT0003734	Endogenous1	33.96	-0.786655	-0.176551	0.610104	0.0711167	0.637269	0.138875	0.305196	0.815286	0.998042	3.77821	3.09592	3.88557	4.20085	3.13586	2.39232	2.91839	3.36737	3.24945	3.64847	3.79286
mmu-miR-668	MIMAT0003732	Endogenous1	59.07	-0.866238	-0.214116	0.652122	0.133225	0.713764	0.257647	0.379132	0.850507	0.998042	2.36177	2.22342	3.88557	3.87873	2.62059	0.978196	2.33342	2.95233	2.76341	2.0635	3.79286
mmu-miR-669a	MIMAT0003477	Endogenous1	49.29	-0.37136	-0.22015	0.15121	0.483665	0.665025	0.806825	0.673693	0.823824	0.998042	4.36317	4.22188	4.30086	5.33842	4.39917	2.7137	4.50335	5.12267	3.52982	4.0635	5.41447
mmu-miR-669e	MIMAT0005853	Endogenous1	50.21	-0.78778	-1.07986	-0.292078	0.102935	0.0243967	0.552274	0.338726	0.246223	0.998042	3.47897	3.80735	4.62293	4.04876	2.40054	3.09085	3.14078	4.17473	2.25096	3.38543	3.09255
mmu-miR-669f	MIMAT0005839	Endogenous1	37.67	-0.857375	-0.584431	0.272944	0.0430779	0.129334	0.458517	0.269508	0.446068	0.998042	6.00675	6.28077	6.94486	6.85611	5.85873	5.32193	5.82528	5.65306	5.72792	5.97016	6.11499
mmu-miR-669g	MIMAT0005832	Endogenous1	53.97	-0.671936	-0.662591	0.00934513	0.20381	0.187053	0.986292	0.454159	0.48565	0.998042	3.0993	3.22188	4.47119	3.20006	2.1375	1.97453	3.50335	3.6893	2.02857	3.38543	3.09255
mmu-miR-669h-5p	MIMAT0005841	Endogenous1	48.21	-0.335297	-0.0870617	0.248235	0.510249	0.856892	0.597142	0.697814	0.916826	0.998042	3.68482	4.33771	5.62293	4.57954	3.81455	3.56071	4.33342	5.17513	3.96625	4.64847	4.79286
mmu-miR-669i	MIMAT0005840	Endogenous1	63.38	-0.733658	-0.824697	-0.0910393	0.179897	0.150552	0.835903	0.429771	0.460608	0.998042	3.36317	3.5435	5.30086	5.04876	3.62176	2.7137	4.03386	3.95233	3.0268	3.64847	3.79286
mmu-miR-669j	MIMAT0005838	Endogenous1	63.07	0.533201	0.524291	-0.00890973	0.405122	0.477493	0.988291	0.632776	0.734404	0.998042	2.9486	2.95977	5.54905	4.46401	3.27352	4.43563	5.33342	5.01167	3.44228	4.45549	5.61618
mmu-miR-669m	MIMAT0009419	Endogenous1	63.51	-0.261315	-0.982047	-0.720732	0.640539	0.0966774	0.126443	0.771372	0.403033	0.998042	2.9486	2.63691	4.76022	4.46401	2.98368	2.7137	4.24031	3.8268	2.61353	2.64847	2.89918
mmu-miR-669o	MIMAT0009421	Endogenous1	44.81	0.105233	0.321684	0.216451	0.839718	0.525571	0.67021	0.907024	0.773007	0.998042	3.47897	3.8846	5.30086	4.57954	4.20633	3.39094	5.24031	4.82731	4.02768	4.64847	5.22188
mmu-miR-670	MIMAT0003736	Endogenous1	58.06	-0.94685	-0.926966	0.0198836	0.117998	0.0424614	0.973017	0.356234	0.279455	0.998042	3.58496	3.33771	4.62293	4.46401	2.1375	1.97453	3.65535	4.45483	2.90111	3.23266	3.09255
mmu-miR-671-3p	MIMAT0004821	Endogenous1	47.86	-0.864172	-0.927945	-0.0637735	0.10729	0.0313574	0.901058	0.344889	0.257729	0.998042	5.13545	4.9222	5.47086	4.20085	2.81352	3.851	4.65535	4.9528	4.14323	3.87086	3.9991
mmu-miR-671-5p	MIMAT0003731	Endogenous1	40.25	-0.276291	-0.315493	-0.0392017	0.562242	0.473834	0.932153	0.728213	0.732759	0.998042	3.77821	2.80735	3.88557	4.33842	2.98368	2.85	3.50335	4.36737	3.0268	3.87086	3.26303
mmu-miR-672	MIMAT0003735	Endogenous1	44.13	-0.104465	-0.411512	-0.307048	0.833554	0.33871	0.530415	0.902088	0.628557	0.998042	4.77768	4.44427	3.62293	3.46336	3.72137	2.97636	4.91839	4.27426	3.34908	3.64847	3.9991
mmu-miR-673-3p	MIMAT0004824	Endogenous1	55.63	-0.59955	-0.293058	0.306492	0.23848	0.602942	0.446166	0.492626	0.799216	0.998042	2.9486	2.95977	4.88606	4.46401	2.98368	3.19849	3.14078	3.5373	2.90111	3.76341	3.90014
mmu-miR-673-5p	MIMAT0003739	Endogenous1	67.16	-0.371192	-1.00141	-0.630221	0.568544	0.122074	0.272495	0.731355	0.446068	0.998042	1.77821	2.80735	4.10852	4.33842	2.81352	1.38957	3.65535	3.6893	2.02857	2.0635	2.67807
mmu-miR-674	MIMAT0003740	Endogenous1	25.46	-0.4988	-0.379119	0.119681	0.247445	0.256381	0.782176	0.496645	0.562449	0.998042	4.16993	3.80735	4.30086	4.33842	3.81455	2.7137	4.14078	3.95233	3.90207	3.87086	3.55213
mmu-miR-675-3p	MIMAT0003726	Endogenous1	29.73	-0.0888781	0.343551	0.432429	0.829032	0.396163	0.302495	0.898929	0.681035	0.998042	3.36317	2.63691	3.62293	3.68594	3.13586	2.85	3.14078	3.8268	3.14241	3.87086	3.9991
mmu-miR-675-5p	MIMAT0003725	Endogenous1	45.77	-1.101	-0.999673	0.101327	0.0348445	0.0133203	0.844853	0.241216	0.200961	0.998042	5.47832	4.95884	5.47086	5.27128	3.13586	3.78346	4.58135	5.27463	4.52982	3.87086	4.48478
mmu-miR-676	MIMAT0003782	Endogenous1	71.26	-1.00303	-1.08727	-0.0842448	0.0744076	0.0668409	0.874603	0.307407	0.341974	0.998042	3.47897	4.02945	5.47086	4.33842	2.98368	2.39232	3.65535	4.27426	3.44228	2.38405	3.90014
mmu-miR-677	MIMAT0003451	Endogenous1	67.46	-0.522109	-0.134975	0.387134	0.407638	0.841581	0.472458	0.633854	0.908568	0.998042	2.10098	2.80735	4.88606	4.20085	2.1375	2.56071	3.14078	4.06781	2.61353	3.38543	4.09255
mmu-miR-678	MIMAT0003452	Endogenous1	46.65	-0.759994	-1.34951	-0.589513	0.0800255	0.009466	0.220249	0.314069	0.198435	0.998042	5.20438	4.68145	5.54905	4.87873	3.81455	3.97636	4.79286	4.68986	3.90207	4.38543	2.89918
mmu-miR-679	MIMAT0003455	Endogenous1	50.15	-0.416214	-0.638336	-0.222122	0.480305	0.133263	0.737476	0.672903	0.44921	0.998042	3.36317	4.02945	4.10852	4.04876	1.81558	2.97636	4.72574	4.36737	2.61353	3.87086	3.26303
mmu-miR-680	MIMAT0003457	Endogenous1	74.83	-0.0891996	-0.525542	-0.436343	0.887414	0.432391	0.465265	0.933669	0.710158	0.998042	1.77821	2.22342	4.47119	2.87971	1.40054	2.85	2.91839	3.8268	2.02857	1.64616	3.26303
mmu-miR-681	MIMAT0003458	Endogenous1	67.49	0.00590847	-0.192335	-0.198243	0.992707	0.798883	0.73576	0.996227	0.895797	0.998042	2.10098	1.22033	3.30159	4.33842	2.40054	1.7137	3.33342	3.5373	1.44361	3.52231	2.67807
mmu-miR-682	MIMAT0003459	Endogenous1	65.18	0.0933391	0.0656111	-0.027728	0.894893	0.926292	0.96092	0.933669	0.963752	0.998042	0.773996	1.95977	4.10852	3.20006	1.40054	1.97453	3.50335	3.5373	2.25096	3.0635	2.41414
mmu-miR-683	MIMAT0003461	Endogenous1	47.92	-0.964661	-0.877746	0.0869151	0.0761156	0.0524221	0.867948	0.310971	0.305886	0.998042	4.77768	4.88509	5.20789	3.87873	2.40054	3.7126	4.24031	4.5373	4.14323	3.38543	3.90014
mmu-miR-684	MIMAT0003462	Endogenous1	54.53	-0.681272	-0.69392	-0.0126486	0.207921	0.186071	0.980707	0.4597	0.48565	0.998042	2.58496	1.95977	3.62293	3.46336	1.81558	1.38957	2.33342	3.36737	2.90111	1.64616	2.09424
mmu-miR-686	MIMAT0003464	Endogenous1	42.5	-0.741986	0.159	0.900986	0.161661	0.607825	0.121438	0.409897	0.801932	0.998042	3.68482	3.95884	3.62293	3.68594	2.1375	2.97636	2.33342	4.5373	4.02768	3.87086	3.79286
mmu-miR-687	MIMAT0003466	Endogenous1	51.18	-0.16513	-0.111316	0.0538139	0.745043	0.807786	0.914244	0.845079	0.900013	0.998042	3.0993	2.95977	4.47119	3.20006	3.13586	2.56071	2.91839	4.45483	2.76341	3.52231	3.67807
mmu-miR-688	MIMAT0003467	Endogenous1	49.05	-0.898381	-0.540979	0.357402	0.15233	0.220584	0.595932	0.404783	0.535717	0.998042	3.47897	3.5435	4.47119	4.20085	1.40054	2.39232	4.03386	4.27426	2.76341	3.38543	3.9991
mmu-miR-689	MIMAT0003468	Endogenous1	48.71	-0.246218	-0.205208	0.0410097	0.622987	0.703357	0.92327	0.764882	0.843285	0.998042	3.58496	3.72465	5.54905	4.87873	4.72137	3.78346	4.42089	3.8268	3.61235	4.52293	4.55213
mmu-miR-690	MIMAT0003469	Endogenous1	38.67	0.118123	0.803917	0.685793	0.788477	0.0416394	0.159921	0.883719	0.277341	0.998042	4.58556	5.09635	5.00135	5.27128	4.06178	5.17233	5.50335	5.68958	5.50843	6.25304	5.61618
mmu-miR-691	MIMAT0003470	Endogenous1	44.16	-0.765048	-0.581238	0.183809	0.0956757	0.198896	0.625566	0.329582	0.507096	0.998042	6.88643	6.09635	7.47094	7.64703	6.58241	6.14608	6.42089	5.89118	6.23688	6.73566	6.35931
mmu-miR-692	MIMAT0003471	Endogenous1	64.2	-0.539553	-0.714043	-0.174491	0.327553	0.220395	0.672415	0.570561	0.535717	0.998042	3.86493	3.33771	5.69321	5.12681	3.51475	3.47897	4.50335	4.36737	3.61235	3.76341	3.9991
mmu-miR-693-3p	MIMAT0004189	Endogenous1	92.98	-1.57875	-1.40151	0.177233	0.0108817	0.0343907	0.728546	0.152705	0.261557	0.998042	3.23726	3.80735	5.54905	4.57954	2.40054	2.85	3.65535	1.95233	2.02857	3.23266	3.41414
mmu-miR-693-5p	MIMAT0003472	Endogenous1	38.7	-0.974956	-0.587024	0.387932	0.023395	0.147792	0.373337	0.202452	0.460608	0.998042	4.42156	4.09677	4.62293	4.04876	2.98368	2.97636	3.50335	3.8268	3.14241	3.64847	4.34056
mmu-miR-694	MIMAT0003474	Endogenous1	80.75	-0.757748	-0.651983	0.105765	0.214868	0.295155	0.852406	0.464181	0.593385	0.998042	2.77821	2.44361	4.76022	2.87971	1.40054	1.97453	2.91839	3.5373	3.14241	2.86987	1.67807
mmu-miR-695	MIMAT0003481	Endogenous1	46.74	-0.465769	-0.331876	0.133892	0.354413	0.49676	0.755206	0.589994	0.750446	0.998042	3.23726	3.09592	4.76022	4.46401	2.98368	2.85	4.03386	3.8268	3.24945	3.87086	3.55213
mmu-miR-696	MIMAT0003483	Endogenous1	58.43	-0.151865	-0.157333	-0.00546817	0.785049	0.793439	0.9886	0.881873	0.895797	0.998042	2.9486	2.80735	5.30086	4.46401	3.62176	3.19849	4.14078	3.95233	3.61235	3.76341	3.79286
mmu-miR-697	MIMAT0003487	Endogenous1	53.87	-0.502024	-0.302298	0.199726	0.316564	0.58869	0.708127	0.561678	0.79333	0.998042	3.58496	3.22188	4.30086	2.46467	2.62059	2.19849	3.79286	2.95233	2.44361	2.64847	4.18031
mmu-miR-698	MIMAT0003488	Endogenous1	85.96	-0.28563	-0.132253	0.153377	0.650561	0.845365	0.756533	0.780122	0.908568	0.998042	2.10098	1.22033	4.30086	1.87971	2.1375	1.7137	3.14078	1.36737	1.76553	2.86987	2.09424
mmu-miR-700	MIMAT0003490	Endogenous1	52.46	-0.108998	0.126719	0.235716	0.804961	0.8134	0.663694	0.892157	0.902714	0.998042	0.773996	0	1.29866	0.879706	0.815575	0	1.33342	0.367371	0.443607	0.0565835	2.09424
mmu-miR-701	MIMAT0003491	Endogenous1	56.23	-1.35869	-0.985933	0.372756	0.0187267	0.0265711	0.48049	0.181808	0.248781	0.998042	4.16993	3.22188	4.30086	4.46401	2.1375	1.7137	2.91839	3.95233	3.0268	2.86987	3.26303
mmu-miR-702	MIMAT0003492	Endogenous1	71.91	-0.237018	-0.540163	-0.303146	0.719806	0.466195	0.568934	0.82807	0.726904	0.998042	2.10098	2.63691	4.76022	4.87873	2.62059	2.85	3.50335	4.45483	2.61353	2.64847	3.90014
mmu-miR-703	MIMAT0003493	Endogenous1	35.93	-0.241399	-0.294083	-0.0526841	0.604662	0.457095	0.913063	0.755493	0.720419	0.998042	4.10014	3.72465	4.62293	4.68594	3.27352	3.47897	4.65535	4.76022	3.61235	3.87086	4.48478
mmu-miR-704	MIMAT0003494	Endogenous1	47.03	0.136593	-0.0960542	-0.232647	0.792647	0.847569	0.613086	0.885376	0.908568	0.998042	3.77821	4.02945	5.76049	4.68594	4.67243	3.7126	5.24031	5.17513	4.08661	4.52293	4.79286
mmu-miR-706	MIMAT0003496	Endogenous1	83.17	1.87836	1.30036	-0.577997	0.00299712	0.106785	0.403302	0.0758781	0.416828	0.998042	3.86493	4.22188	5.38853	5.83314	6.5008	5.78346	7.38862	7.14904	4.61235	5.97016	7.79993
mmu-miR-707	MIMAT0003497	Endogenous1	36.1	0.112206	0.493845	0.38164	0.807143	0.289987	0.334628	0.892271	0.593385	0.998042	2.10098	2.44361	3.88557	2.87971	2.40054	2.85	3.33342	3.17473	3.34908	3.52231	3.09255
mmu-miR-708	MIMAT0004828	Endogenous1	41.78	0.429705	-0.537821	-0.967526	0.332119	0.222315	0.0237264	0.573108	0.535717	0.998042	3.77821	4.33771	5.38853	4.33842	5.2407	4.39094	4.91839	5.01167	4.02768	3.64847	4.09255
mmu-miR-709	MIMAT0003499	Endogenous1	24.04	0.470712	0.46325	-0.00746175	0.246996	0.223689	0.983925	0.496645	0.535717	0.998042	5.47832	5.33735	4.62293	5.68622	5.96394	5.54102	5.46271	6.04002	5.59216	5.9939	5.64731
mmu-miR-710	MIMAT0003500	Endogenous1	31.38	-0.617646	-0.654871	-0.0372254	0.140428	0.0803189	0.928058	0.393476	0.363684	0.998042	4.86542	4.54411	4.76022	4.20085	3.39917	3.7126	4.42089	4.36737	4.19771	4.0635	3.55213
mmu-miR-711	MIMAT0003501	Endogenous1	50.44	-0.110368	-0.303046	-0.192679	0.822377	0.540295	0.631183	0.897952	0.778981	0.998042	3.36317	3.09592	5.10852	3.87873	3.72137	3.09085	4.24031	3.95233	3.34908	3.64847	3.67807
mmu-miR-712	MIMAT0003502	Endogenous1	35.94	0.315181	-0.199184	-0.514366	0.47233	0.620604	0.2349	0.667895	0.806376	0.998042	4.53294	4.44427	5.38853	5.46369	4.81404	4.8505	5.88801	5.53761	4.57168	4.52293	5.17991
mmu-miR-713	MIMAT0003504	Endogenous1	40.02	0.134917	-0.0345821	-0.169499	0.780698	0.937941	0.692014	0.88023	0.970295	0.998042	3.0993	3.09592	3.88557	4.68594	3.51475	3.09085	4.33342	4.36737	3.52982	3.76341	3.67807
mmu-miR-714	MIMAT0003505	Endogenous1	36.86	0.515522	-0.349025	-0.864547	0.199163	0.32905	0.0544444	0.447571	0.618746	0.998042	5.6605	5.28096	5.76049	5.46369	5.96394	5.54102	6.08831	6.63445	4.72792	5.23304	5.61618
mmu-miR-715	MIMAT0003506	Endogenous1	50.57	-0.558716	0.46647	1.02519	0.260237	0.385006	0.0209794	0.507293	0.674654	0.998042	2.10098	1.95977	3.62293	3.68594	2.1375	1.97453	2.33342	2.6893	2.90111	3.23266	3.79286
mmu-miR-717	MIMAT0003510	Endogenous1	48.88	-0.249927	-0.391016	-0.141089	0.637703	0.413649	0.782497	0.771372	0.694734	0.998042	3.94767	3.44493	5.20789	4.57954	3.27352	3.29866	4.65535	4.9528	4.39643	3.76341	3.55213
mmu-miR-718	MIMAT0003514	Endogenous1	39.85	-0.375888	-0.347695	0.0281934	0.42972	0.449637	0.956957	0.641733	0.718912	0.998042	3.36317	3.09592	3.88557	4.20085	2.62059	2.56071	3.79286	4.06781	2.44361	3.52231	3.90014
mmu-miR-719	MIMAT0003465	Endogenous1	52.31	-1.16384	-0.0245009	1.13933	0.0908002	0.959068	0.0961045	0.325272	0.978076	0.998042	3.94767	3.33771	4.47119	2.46467	2.98368	0.389567	3.50335	2.6893	3.52982	3.64847	3.41414
mmu-miR-720	MIMAT0003484	Endogenous1	30.63	-0.552099	-0.503762	0.0483376	0.179255	0.183566	0.900468	0.429771	0.48565	0.998042	17.1694	17.3222	17.9775	17.9129	16.9678	16.5512	17.3264	17.3282	16.7663	17.1607	17.3482
mmu-miR-741	MIMAT0004236	Endogenous1	35.84	-0.585645	-0.476651	0.108993	0.175907	0.234473	0.788293	0.429152	0.541681	0.998042	7.73789	8.02497	8.89342	8.3051	7.69077	6.99853	7.98442	7.94509	7.36728	7.87701	8.0468
mmu-miR-742	MIMAT0004237	Endogenous1	35.8	-0.54743	-0.505251	0.0421786	0.220874	0.186925	0.920652	0.468235	0.48565	0.998042	5.4219	5.1914	6.25512	5.78581	4.81404	4.43563	5.75969	5.45516	4.99729	5.38509	5.09255
mmu-miR-743a	MIMAT0004238	Endogenous1	17.76	-0.212399	-0.218458	-0.00605877	0.574376	0.507555	0.986966	0.737181	0.762006	0.998042	4.94767	4.33771	4.76022	4.57954	4.39917	4.03474	4.72574	4.61589	4.2502	4.64847	4.41481
mmu-miR-743b-3p	MIMAT0004840	Endogenous1	44.68	-0.783592	-0.534189	0.249402	0.130608	0.195733	0.614225	0.379097	0.504602	0.998042	3.86493	4.02945	4.76022	5.04876	2.62059	3.29866	4.03386	4.61589	3.61235	4.0635	3.9991
mmu-miR-743b-5p	MIMAT0004839	Endogenous1	24.55	-0.570666	-0.358001	0.212665	0.159834	0.296689	0.612933	0.409897	0.593385	0.998042	5.0635	5.1914	5.30086	5.27128	4.76871	3.91456	4.79286	5.06824	4.39643	4.96993	5.17991
mmu-miR-744	MIMAT0004187	Endogenous1	52.08	-0.877198	-0.619344	0.257854	0.0732064	0.185548	0.511238	0.305196	0.48565	0.998042	3.23726	2.80735	4.10852	4.46401	2.40054	2.39232	3.14078	3.17473	3.14241	2.86987	3.09255
mmu-miR-758	MIMAT0003889	Endogenous1	76.7	-0.135435	-0.134115	0.00132025	0.856331	0.862116	0.998042	0.919703	0.920675	0.998042	1.36177	2.44361	5.00135	4.20085	2.62059	1.97453	3.50335	4.36737	3.0268	3.0635	3.26303
mmu-miR-759	MIMAT0003897	Endogenous1	55.4	-1.20772	-1.2535	-0.0457777	0.0476669	0.00891911	0.942751	0.278976	0.19682	0.998042	4.23726	4.33771	4.76022	4.96625	1.81558	2.97636	3.91839	4.76022	3.90207	3.38543	2.67807
mmu-miR-760	MIMAT0003898	Endogenous1	57.89	-1.53239	-1.15703	0.37536	0.0150849	0.0124859	0.541389	0.163663	0.200961	0.998042	5.23726	4.80684	5.30086	4.33842	2.1375	2.56071	4.58135	4.27426	3.96625	3.23266	4.09255
mmu-miR-761	MIMAT0003893	Endogenous1	56.45	-0.498386	-0.366139	0.132247	0.368298	0.491393	0.809749	0.607713	0.747656	0.998042	3.23726	3.09592	4.88606	4.04876	2.40054	2.7137	3.79286	4.36737	3.0268	3.0635	4.26228
mmu-miR-762	MIMAT0003892	Endogenous1	42.26	-0.422617	0.161549	0.584166	0.37633	0.728794	0.222323	0.615615	0.856882	0.998042	2.9486	3.22188	4.47119	3.87873	2.81352	2.56071	3.91839	3.5373	3.14241	4.23343	3.9991
mmu-miR-763	MIMAT0003896	Endogenous1	60.65	-0.151227	-0.36469	-0.213463	0.811587	0.549527	0.696349	0.893693	0.778981	0.998042	2.10098	2.80735	4.62293	4.20085	2.62059	2.19849	4.24031	4.06781	3.14241	2.64847	3.41414
mmu-miR-764-3p	MIMAT0003895	Endogenous1	61.46	-0.48319	-0.649072	-0.165883	0.423568	0.368346	0.786964	0.637606	0.657325	0.998042	3.86493	4.72465	5.00135	2.46467	2.62059	3.47897	3.33342	4.68986	3.69042	2.0635	4.34056
mmu-miR-764-5p	MIMAT0003894	Endogenous1	33.26	-0.484837	-0.418306	0.0665308	0.286802	0.239574	0.888822	0.535742	0.544861	0.998042	5.0635	4.99458	5.54905	5.27128	4.20633	3.97636	5.14078	5.61559	4.39643	4.87036	5.13709
mmu-miR-767	MIMAT0012773	Endogenous1	50.75	-0.878767	-1.16397	-0.2852	0.0613732	0.0276912	0.530681	0.305196	0.248781	0.998042	5.02591	3.63691	4.76022	4.68594	3.13586	3.39094	4.24031	3.8268	3.44228	2.64847	3.9991
mmu-miR-770-3p	MIMAT0003891	Endogenous1	43.91	-0.87292	-1.05701	-0.184085	0.0818776	0.0056441	0.716268	0.314069	0.19682	0.998042	5.13545	5.22188	4.88606	5.12681	3.39917	3.47897	4.72574	5.27463	4.14323	3.87086	4.09255
mmu-miR-770-5p	MIMAT0004822	Endogenous1	39.92	-0.754103	-0.581402	0.172701	0.118325	0.126868	0.710339	0.356234	0.446068	0.998042	4.23726	3.95884	4.47119	3.46336	2.40054	3.29866	3.14078	4.27426	3.44228	3.64847	3.26303
mmu-miR-7a	MIMAT0000677	Endogenous1	28.24	-0.317813	-0.444578	-0.126766	0.430827	0.230312	0.749838	0.641733	0.539945	0.998042	4.58556	4.84649	5.47086	4.96625	4.62176	4.14568	4.65535	5.17513	4.19771	4.52293	4.8475
mmu-miR-7b	MIMAT0000678	Endogenous1	48.31	-1.20011	-0.550866	0.64924	0.0203608	0.174621	0.184812	0.188922	0.479856	0.998042	4.23726	3.80735	5.00135	4.33842	3.51475	2.19849	2.91839	3.95233	3.44228	4.15056	3.79286
mmu-miR-802	MIMAT0004188	Endogenous1	98.09	-1.17034	-1.16373	0.00660681	0.0826361	0.136676	0.988753	0.314069	0.452535	0.998042	2.9486	3.22188	5.69321	5.52262	3.27352	2.56071	3.91839	2.95233	3.61235	2.38405	3.55213
mmu-miR-804	MIMAT0004210	Endogenous1	26.53	0.569417	0.0921785	-0.477238	0.162146	0.79535	0.207869	0.409897	0.895797	0.998042	5.88655	5.28096	6.30104	6.04876	6.45812	6.04941	6.56224	6.7252	5.88533	6.12928	5.8999
mmu-miR-871	MIMAT0004841	Endogenous1	51.08	-0.511318	-0.369572	0.141746	0.347287	0.460561	0.815081	0.587142	0.720419	0.998042	4.53294	3.72465	5.10852	4.68594	3.98459	2.7137	4.03386	5.27463	3.52982	3.76341	5.13709
mmu-miR-872	MIMAT0004934	Endogenous1	23.51	0.0662766	-0.0598266	-0.126103	0.864108	0.879766	0.74742	0.922652	0.935992	0.998042	3.58496	3.5435	4.47119	4.04876	3.81455	3.78346	4.14078	4.17473	4.14323	4.15056	3.26303
mmu-miR-873	MIMAT0004936	Endogenous1	48.06	-1.05051	-0.997391	0.0531231	0.0370422	0.0150625	0.913771	0.241714	0.200961	0.998042	5.13545	4.84649	5.38853	4.68594	3.39917	3.29866	4.03386	5.12267	3.76447	3.87086	4.41481
mmu-miR-874	MIMAT0004853	Endogenous1	41.75	0.0665706	-0.222923	-0.289493	0.895729	0.673562	0.484626	0.933669	0.828775	0.998042	3.36317	2.63691	4.62293	4.57954	3.98459	3.19849	3.91839	4.36737	3.34908	3.96993	3.41414
mmu-miR-875-3p	MIMAT0004938	Endogenous1	33.11	-0.563636	-0.61253	-0.0488936	0.201486	0.100402	0.911483	0.450755	0.403033	0.998042	5.23726	4.49506	4.88606	5.12681	4.20633	3.56071	4.65535	5.06824	4.14323	4.15056	4.67751
mmu-miR-875-5p	MIMAT0004937	Endogenous1	40.15	-0.750772	-1.05366	-0.302884	0.0926515	0.0126067	0.501655	0.32767	0.200961	0.998042	5.0635	4.95884	5.10852	4.46401	3.39917	3.851	4.72574	4.61589	4.2502	3.87086	3.41414
mmu-miR-876-3p	MIMAT0004855	Endogenous1	49.57	-0.606948	-0.351785	0.255163	0.241711	0.428969	0.619945	0.496435	0.709931	0.998042	3.47897	3.22188	4.62293	3.46336	2.1375	2.7137	3.33342	4.17473	2.90111	3.87086	3.26303
mmu-miR-876-5p	MIMAT0004854	Endogenous1	56.65	-0.265449	-0.207952	0.0574968	0.622308	0.723721	0.909639	0.764882	0.855524	0.998042	4.23726	3.80735	6.05593	4.96625	4.13586	3.7126	5.03386	5.12267	3.69042	4.76394	5.22188
mmu-miR-877	MIMAT0004861	Endogenous1	54.08	-1.11708	-0.937638	0.179447	0.05233	0.0415984	0.763696	0.296188	0.277341	0.998042	4.47832	4.16027	4.62293	3.68594	2.1375	2.39232	3.33342	4.61589	3.34908	2.64847	3.90014
mmu-miR-878-3p	MIMAT0004933	Endogenous1	66.59	-1.10979	-0.602077	0.507715	0.0712153	0.262458	0.337216	0.305196	0.571351	0.998042	4.23726	3.63691	5.82451	5.12681	3.90207	2.19849	3.91839	4.36737	3.83491	4.38543	4.09255
mmu-miR-878-5p	MIMAT0004932	Endogenous1	45.57	-0.186146	0.00677353	0.192919	0.737367	0.988854	0.715486	0.843131	0.99053	0.998042	3.36317	3.44493	4.88606	4.78555	3.39917	2.85	4.72574	4.76022	3.76447	4.0635	4.55213
mmu-miR-879	MIMAT0004842	Endogenous1	46.93	-1.11231	-0.771635	0.340674	0.0633626	0.0478029	0.569192	0.305196	0.297074	0.998042	5.0635	4.9222	4.30086	5.27128	2.40054	3.09085	4.85699	4.76022	4.02768	4.0635	4.26228
mmu-miR-880	MIMAT0004844	Endogenous1	71.7	-0.505352	-0.152742	0.35261	0.416084	0.820498	0.483278	0.637606	0.90614	0.998042	2.77821	2.22342	5.10852	4.04876	2.40054	2.39232	3.65535	3.6893	3.61235	2.64847	3.90014
mmu-miR-881	MIMAT0004846	Endogenous1	50.56	-0.547191	-0.020398	0.526793	0.398333	0.964175	0.419122	0.627743	0.981516	0.998042	1.77821	2.22342	3.62293	2.46467	0	2.39232	2.33342	3.17473	2.44361	2.38405	2.67807
mmu-miR-882	MIMAT0004847	Endogenous1	32.46	-0.452649	-0.45061	0.00203941	0.315546	0.181594	0.996435	0.561678	0.48565	0.998042	5.09972	4.76607	4.88606	4.46401	3.81455	3.63923	4.72574	5.22574	4.48671	4.31107	4.26228
mmu-miR-883a-3p	MIMAT0004849	Endogenous1	45.93	-0.225679	-1.15606	-0.930376	0.616542	0.054673	0.132166	0.761927	0.311709	0.998042	3.86493	3.63691	2.88557	3.46336	2.40054	2.97636	3.50335	4.06781	3.44228	1.0635	2.41414
mmu-miR-883a-5p	MIMAT0004848	Endogenous1	58.93	-0.639894	-0.825865	-0.185972	0.186124	0.134128	0.684268	0.434274	0.44921	0.998042	3.36317	3.09592	4.88606	3.87873	3.27352	2.56071	3.14078	3.6893	2.76341	2.38405	3.79286
mmu-miR-883b-3p	MIMAT0004851	Endogenous1	45.32	-0.398599	-0.258922	0.139677	0.426163	0.580473	0.746385	0.639809	0.791681	0.998042	5.36282	5.56773	7.08236	6.55121	5.36877	5.0635	6.44195	6.0955	5.70929	5.84449	6.09255
mmu-miR-883b-5p	MIMAT0004850	Endogenous1	43.78	0.160427	-0.160785	-0.321212	0.740357	0.760258	0.452863	0.843143	0.874606	0.998042	3.58496	3.22188	5.20789	4.46401	3.81455	4.14568	4.79286	4.36737	3.61235	3.64847	4.61589
mmu-miR-9	MIMAT0000142	Endogenous1	54.5	-0.664443	-1.21793	-0.553483	0.197387	0.0482877	0.352359	0.446885	0.297074	0.998042	3.36317	3.80735	4.76022	4.57954	2.98368	2.56071	4.03386	4.27426	1.76553	3.87086	3.09255
mmu-miR-92a	MIMAT0000539	Endogenous1	45.46	-0.33467	0.0131207	0.347791	0.486074	0.978057	0.378661	0.674309	0.98941	0.998042	3.23726	2.95977	3.88557	4.87873	2.81352	3.47897	3.50335	3.8268	3.61235	3.96993	3.67807
mmu-miR-92b	MIMAT0004899	Endogenous1	59.75	-0.835973	-0.521427	0.314546	0.160714	0.352378	0.612162	0.409897	0.633638	0.998042	2.58496	2.80735	4.30086	3.68594	1.81558	1.38957	3.14078	3.6893	2.02857	3.76341	2.67807
mmu-miR-93	MIMAT0000540	Endogenous1	27.53	0.883214	0.473465	-0.409749	0.0252889	0.147565	0.252055	0.204479	0.460608	0.998042	6.75515	6.62571	6.58631	6.30506	7.37652	7.51009	7.56217	7.35632	7.02746	7.08566	7.01145
mmu-miR-96	MIMAT0000541	Endogenous1	45.83	0.833364	1.07459	0.241224	0.100793	0.0144871	0.637477	0.338065	0.200961	0.998042	6.15299	5.80684	5.20789	5.52262	5.17193	7.04221	6.85699	6.95268	7.12897	6.79116	6.32139
mmu-miR-98	MIMAT0000545	Endogenous1	38.08	0.347543	-0.0323471	-0.37989	0.433113	0.92467	0.419584	0.642366	0.963752	0.998042	7.24555	7.00326	6.72724	6.68622	7.98419	7.76188	6.87258	6.43379	7.24982	6.539	6.86084
mmu-miR-99a	MIMAT0000131	Endogenous1	31.1	-0.438319	-0.237411	0.200909	0.310021	0.515599	0.643543	0.560613	0.769997	0.998042	7.01636	6.69223	6.30104	6.20085	5.54226	5.78346	6.24031	6.89118	6.4082	5.92125	6.61618
mmu-miR-99b	MIMAT0000132	Endogenous1	24.92	-0.0443569	-0.202261	-0.157904	0.913162	0.573049	0.701961	0.943157	0.787247	0.998042	6.37782	6.1916	5.54905	6.00809	5.33771	5.86691	6.39951	6.34501	5.76447	5.52262	6.20105
