# Supplementary material for: Dysregulation of miR-1-3p: An Early Event in Colitis-Associated Dysplasia
Source: Int J Mol Sci. 2022 Oct 27;23(21):13024. doi: 10.3390/ijms232113024 (PMC9657954; doi:10.3390/ijms232113024)
Supplement: Supplementary file 1 [file ijms-23-13024-s001.zip › Supplementary Data S2 - Fragoso et al - Supplementary Data S2 - Microarray_mRNA_expression_Inflamed_versus_Polypoid tissue.xlsx]

## Sheet: mRNA_mouse_data
Polypoid vs. inflamed tissues in untreated animals (polyp/inflamed tissue)						n =4 (2 inflamed, 2 polyps)			FDR 1%
ProbeName	Coef.treat.0	Coef.tissue.0	Coef.treat.1	Coef.tissue.1	FDR.treat.0	FDR.tissue.0	FDR.treat.1	FDR.tissue.1	Fold change	GeneSymbol	Accession
A_51_P484526	0.582671	5.35544	0.523721	5.29649	0.00246101	1.79e-10	0.0058548	5.45e-10	40.9399	Wif1	NM_011915
A_52_P476535	1.26217	5.2544	0.460856	4.45309	1.44e-06	1.04e-11	0.000946483	4.72e-11	38.1709	Defcr23	NM_001012307
A_51_P124285	0.308838	4.93827	0.0132209	4.64265	0.246411	2.74e-09	0.968625	2.64e-09	30.6596	Nkd1	NM_027280
A_51_P496905	-0.0520776	4.88356	0.24352	5.17915	0.925105	5.69e-09	0.452992	5.33e-09	29.5187	Cfi	NM_007686
A_52_P578763	0.931423	4.86419	0.0522153	3.98498	4.99e-05	3.56e-11	0.752639	1.04e-10	29.1251	Defa1	NM_010031
A_51_P404193	0.439026	4.83001	0.000681332	4.39166	0.0112152	1.79e-10	0.997537	1.92e-10	28.4431	Sp5	NM_022435
A_51_P431539	0.845146	4.61394	-0.696658	3.07214	0.000192476	8.61e-11	0.000237813	1.23e-09	24.487	1700027L20Rik	XM_487606
A_51_P416858	-0.173427	4.48178	-0.655394	3.99981	0.327079	2.76e-08	0.00264068	2.35e-08	22.3435	Myl1	NM_021285
A_51_P122321	-0.430978	4.40065	-0.519766	4.31186	0.00259906	1.04e-11	0.000209982	1.61e-11	21.1216	Il33	NM_133775
A_52_P514200	0.581815	4.34231	0.16048	3.92098	4.71e-05	2.58e-12	0.0603665	7.75e-12	20.2846	Defcr6	NM_007852
A_51_P426096	0.0958461	4.32231	-0.651462	3.575	0.748029	2.35e-09	0.00366074	4.15e-08	20.0053	Mmp7	NM_010810
A_51_P510156	0.147859	4.27009	-1.0484	3.07383	0.298843	1.23e-10	4.61e-06	4.91e-10	19.2941	Lcn2	NM_008491
A_51_P358765	0.159124	4.25964	-1.57738	2.52314	0.311814	1.94e-10	5.14e-07	4.18e-09	19.1549	Spp1	NM_009263
A_52_P249336	0.941185	4.1639	0.569806	3.79252	1.79e-05	8.61e-11	0.000408205	2.32e-10	17.925	Defcr20	NM_183268
A_51_P136781	-0.147681	4.16082	-0.0166391	4.29186	0.51732	6.79e-10	0.947759	1.35e-09	17.8868	Pnliprp1	NM_018874
A_51_P339793	0.520059	4.1535	-0.0932035	3.54023	0.00452917	4.89e-10	0.598672	8.41e-10	17.7962	Il1rl1	NM_010743
A_52_P385801	-0.193272	4.13715	0.196707	4.52713	0.314781	1.46e-10	0.203711	9.31e-11	17.5957	Spock2	AK122233
A_51_P402943	-0.615169	4.10308	-0.266959	4.45129	0.0593711	1.17e-08	0.358749	9.45e-09	17.1851	S100a9	NM_009114
A_52_P106620	0.337032	4.05014	0.18167	3.89478	0.0440281	1.22e-10	0.207024	1.58e-10	16.5658	Tnfrsf11b	NM_008764
A_51_P241068	-0.0914388	3.99358	0.624902	4.70992	0.7425	4.75e-10	0.00180836	1.92e-10	15.929	Dkk2	NM_020265
A_51_P306287	0.210547	3.92752	0.0163488	3.73333	0.470234	6.96e-09	0.961356	3.13e-08	15.2161	NA	XM_131731
A_52_P113518	0.658971	3.90572	-0.603975	2.64277	0.0681791	3.83e-08	0.0499697	2.2e-06	14.9878	Aldh1a3	BC026667
A_51_P218091	-0.111926	3.86868	-0.272961	3.70765	0.464983	4.94e-11	0.0198404	4.72e-11	14.608	Lgr5	NM_010195
A_51_P206405	-0.0820496	3.80738	-0.395013	3.49442	0.759171	4.71e-10	0.021479	1.11e-09	14.0003	Ptprz1	XM_888896
A_51_P123745	0.422175	3.76265	-0.287906	3.05257	0.00184565	1.8e-10	0.00763079	5.9e-10	13.5728	BC011467	BC025823
A_52_P297765	0.258924	3.70785	-0.0130171	3.43591	0.468777	1.87e-08	0.97241	6.21e-08	13.067	2310031A18Rik	XM_134539
A_52_P514061	0.0366235	3.66232	-0.35732	3.26838	0.902768	5.95e-10	0.0353558	1.94e-09	12.661	NA	AK137625
A_52_P706060	-0.133472	3.55635	0.986386	4.6762	0.178169	8.75e-12	1.69e-07	2.65e-12	11.7643	2700083E18Rik	NM_001029890
A_51_P257550	1.07934	3.48441	-0.238767	2.16631	5.46e-06	2.51e-10	0.0522577	4.61e-09	11.1921	Marcksl1	NM_010807
A_51_P467086	0.732342	3.44444	0.0235186	2.73561	0.00210494	9.28e-09	0.932416	2.46e-07	10.8863	Defcr3	NM_007850
A_52_P629748	0.171219	3.3882	0.273636	3.49062	0.49059	1.83e-09	0.136093	2.21e-09	10.4701	5730593N15Rik	NM_175263
A_51_P120830	-0.215733	3.37577	-0.635103	2.9564	0.207883	9.05e-10	0.00088438	6.32e-09	10.3802	Mmp10	NM_019471
A_52_P221756	0.457025	3.36063	-0.0203078	2.8833	0.036853	2.19e-09	0.935694	1.24e-08	10.2719	Spock2	NM_052994
A_51_P177210	0.0440091	3.35701	-0.243147	3.06986	0.922453	2.24e-08	0.34709	8.72e-08	10.2462	Myl3	NM_010859
A_51_P438853	1.71611	3.31578	1.40754	3.0072	1.23e-06	5.38e-10	9.81e-07	1.52e-09	9.95745	Serpinb11	NM_025867
A_51_P477682	-0.310469	3.28263	0.224846	3.81795	0.0710436	4.83e-10	0.124501	2.2e-10	9.7313	Prss12	NM_008939
A_51_P359315	-0.0640476	3.27417	-0.14874	3.18948	0.844294	3.88e-09	0.477381	7.49e-09	9.67438	Apobec2	NM_009694
A_51_P432607	-0.145722	3.27347	-2.81754	0.601652	0.453602	1.32e-09	3.84e-08	0.00239699	9.66972	EG433180	NM_001013797
A_51_P287198	0.0963841	3.24249	-0.0438458	3.10226	0.771048	1.96e-08	0.882464	9.52e-08	9.46425	Krt23	NM_033373
A_52_P22611	0.0353649	3.2109	0.220371	3.39591	0.866214	5.15e-10	0.110213	8.22e-10	9.25931	NA	NM_001033288
A_52_P467449	0.253548	3.16349	-0.364473	2.54547	0.25727	7.58e-06	0.0727412	1.3e-05	8.95996	Alox12	NM_007440
A_52_P232580	0.0660636	3.11491	0.212066	3.26092	0.744477	2.51e-10	0.099386	2.66e-10	8.66328	Dyrk3	NM_145508
A_52_P206002	0.783141	3.09034	0.413804	2.721	0.000561857	1.32e-09	0.0130562	5.95e-09	8.51695	Defcr22	NM_207658
A_51_P255875	-0.0440757	3.06767	-0.299129	2.81262	0.820638	1.77e-10	0.0133682	3.57e-10	8.38417	Padi4	NM_011061
A_52_P563375	0.0109076	3.06588	-1.22551	1.82947	0.96397	3.13e-10	9.4e-07	2.98e-08	8.37379	Lgals2	NM_025622
A_52_P54176	0.0645119	2.98734	0.967378	3.8902	0.764298	5.17e-10	7.9e-06	1.05e-10	7.93009	Axin2	NM_015732
A_51_P466229	0.440313	2.96856	0.501585	3.02983	0.0253775	3.72e-08	0.0165137	4.37e-08	7.82755	Pdgfrl	NM_026840
A_51_P179258	0.292627	2.95903	0.929056	3.59546	0.0204414	1.22e-10	1.51e-06	3.88e-11	7.776	Kif26b	NM_177757
A_52_P415155	0.162231	2.945	0.793466	3.57623	0.27618	2.49e-10	1.51e-05	9.22e-11	7.70074	Wnt6	NM_009526
A_51_P358344	-0.0528666	2.94424	-0.141721	2.85539	0.879011	1.25e-08	0.520588	2.67e-08	7.69671	Col17a1	NM_007732
A_51_P212782	-0.197642	2.93737	0.252898	3.38791	0.673053	4.98e-07	0.452533	2.94e-07	7.66013	Il1b	NM_008361
A_51_P399305	0.475026	2.93259	1.30638	3.76394	0.00566266	6.38e-10	8.32e-07	1.53e-10	7.63479	Tnfrsf19	NM_013869
A_51_P155643	0.302087	2.92674	-1.47671	1.14795	0.0148108	1.48e-09	6.55e-07	1.62e-06	7.60392	S100a11	NM_016740
A_51_P462192	-0.210748	2.89451	-1.5757	1.52955	0.257864	2.85e-08	7.05e-06	4.55e-06	7.4359	Olr1	NM_138648
A_52_P144368	0.887675	2.85518	1.35094	3.31845	4.31e-06	8.61e-11	4.67e-08	3.33e-11	7.23595	Odz4	AK147579
A_51_P286488	0.291003	2.82897	0.352643	2.89061	0.0185514	1.37e-10	0.00216387	1.29e-10	7.10568	Ier3	NM_133662
A_52_P424784	-0.0280093	2.81565	-1.22671	1.61695	0.871474	1.22e-10	1.44e-07	9.01e-09	7.04038	Clstn2	NM_022319
A_52_P260145	0.316517	2.81486	-1.31916	1.17918	0.137841	7.07e-09	6.38e-06	2.31e-05	7.03649	NA	XM_619524
A_51_P303160	0.139172	2.78042	-0.695024	1.94622	0.646379	3.72e-07	0.011769	8.53e-06	6.8705	Arg1	NM_007482
A_52_P87843	1.05998	2.76595	-0.13532	1.57064	0.000240097	2.71e-08	0.553633	9.64e-06	6.80194	Aldh1a3	NM_053080
A_51_P447545	0.107427	2.75873	0.374804	3.0261	0.831668	1.53e-06	0.18099	5.79e-07	6.76799	Igfbp1	NM_008341
A_51_P473383	0.469724	2.7463	0.790402	3.06698	0.000644215	2.49e-10	9.67e-06	2.79e-10	6.70993	Odz4	NM_011858
A_51_P128876	0.574097	2.72943	-0.0637594	2.09157	0.00486452	1.16e-07	0.783615	1.63e-06	6.63193	Ifitm3	NM_025378
A_51_P363187	0.959056	2.7044	2.91683	4.66217	3.46e-05	1.04e-09	4.5e-09	3.75e-11	6.51787	Cxcl1	NM_008176
A_52_P563908	0.208423	2.70365	1.04289	3.53812	0.241829	1.74e-09	7.86e-06	3.42e-10	6.51448	Prox1	AK038396
A_52_P39546	-0.0933831	2.69772	0.33758	3.12869	0.418456	8.61e-11	0.000992914	3.33e-11	6.48778	Tead2	NM_011565
A_51_P146560	-0.0529277	2.68363	-0.861389	1.87517	0.687877	8.61e-11	6.63e-07	8.73e-10	6.42472	Msln	NM_018857
A_51_P165342	1.12358	2.68234	-0.884136	0.674616	8.12e-07	9.81e-11	7.73e-07	8.66e-06	6.41894	Anxa2	NM_007585
A_51_P338600	1.58621	2.68095	-1.17705	-0.0823046	3.42e-06	2.17e-08	2.35e-05	0.644335	6.41278	Tmem14c	NM_025387
A_52_P229278	0.0843583	2.6346	0.81282	3.36306	0.55956	1.94e-10	3.69e-06	4.72e-11	6.21003	3732412D22Rik	NM_001001980
A_51_P319917	-0.0914301	2.6285	-0.393054	2.32688	0.506861	1.07e-09	0.00236767	1.57e-09	6.18383	Adam8	NM_007403
A_51_P520310	0.129358	2.62615	-0.8146	1.68219	0.573749	5.81e-09	0.000136634	4.44e-07	6.17375	Alox12	NM_007440
A_51_P496795	-0.0154461	2.61028	-1.33953	1.2862	0.959999	7.03e-09	2.99e-06	5.54e-06	6.10624	A330049M08Rik	NM_145555
A_51_P392303	0.343698	2.59639	0.246567	2.49926	0.0657553	5.14e-09	0.120862	1.11e-08	6.04773	Lrrn3	NM_010733
A_52_P1172945	0.131412	2.58758	0.988607	3.44478	0.58088	8.23e-09	3.82e-05	1.24e-09	6.0109	Ankrd34b	BC096609
A_51_P196444	0.126663	2.58726	1.00038	3.46098	0.429869	6.79e-10	2.6e-06	1.18e-10	6.00956	Foxc2	NM_013519
A_52_P233342	0.931463	2.56825	-1.9098	-0.273021	0.0289656	4.68e-05	0.000425165	0.491357	5.93088	Trim15	NM_001024134
A_51_P309307	-0.0979095	2.51401	1.01987	3.63179	0.519367	1.39e-09	1.09e-06	8.95e-11	5.71207	Gm566	BC027668
A_51_P145693	0.150629	2.48726	1.11531	3.45194	0.482732	7.14e-09	9.35e-06	7.99e-10	5.6071	Cubn	XM_130038
A_51_P248819	0.344225	2.48552	0.0207662	2.16207	0.0196349	9.68e-10	0.895674	4.27e-09	5.60038	Bambi	NM_026505
A_51_P114826	0.709747	2.45725	-0.13568	1.61183	0.000100673	6.77e-10	0.249568	3.09e-08	5.4917	Cdh13	NM_019707
A_51_P423484	-0.31818	2.45241	0.575904	3.34649	0.01041	2.51e-10	4.94e-05	4.45e-11	5.4733	Rbp1	NM_011254
A_51_P171616	0.32804	2.44294	2.46589	4.58079	0.0162118	6.17e-10	4.4e-09	1.34e-11	5.4375	Wnt10a	NM_009518
A_51_P337101	0.84393	2.4399	0.359979	1.95595	6.57e-05	1.59e-09	0.00842628	1.61e-08	5.42603	Rnf43	NM_172448
A_52_P231232	-0.00908411	2.43378	0.0539327	2.4968	0.967462	9.48e-10	0.701464	1.08e-09	5.40307	Nanos1	NM_178421
A_51_P301566	0.4335	2.42688	0.756721	2.7501	0.00100593	1.99e-10	3.74e-06	1.15e-10	5.37728	Plat	NM_008872
A_51_P131408	0.31385	2.41698	-0.274862	1.82827	0.0292409	1.07e-09	0.0258828	1.64e-08	5.34054	Tnfrsf12a	NM_013749
A_52_P657324	0.121892	2.41529	-0.141754	2.15164	0.328503	9.05e-10	0.116886	1.19e-09	5.33425	Rnf32	NM_021470
A_52_P644972	1.43721	2.41166	-2.0293	-1.05485	1.79e-05	3.07e-08	3.11e-07	7.75e-05	5.32088	2410129H14Rik	NM_175245
A_51_P243755	0.472733	2.40447	0.577571	2.5093	0.0302115	3.04e-08	0.00394833	3.88e-08	5.29439	Slc10a2	NM_011388
A_52_P410685	0.230409	2.38848	-0.803478	1.3546	0.130437	1.73e-09	2.32e-05	3.6e-07	5.23607	Krt7	NM_033073
A_51_P189358	0.104271	2.38769	0.498849	2.78227	0.421788	2.51e-10	0.000126508	1.29e-10	5.23319	BC007180	XM_131217
A_51_P347333	-0.270842	2.35999	1.07096	3.7018	0.00909954	2.55e-10	4.4e-07	3.88e-11	5.13367	Dusp4	AK012530
A_51_P279437	0.443643	2.35212	-0.558951	1.34952	0.000675517	1.99e-10	3.28e-05	2.32e-08	5.10572	Mfsd2	NM_029662
A_51_P254855	0.922315	2.34326	0.285478	1.70642	3.55e-05	1.03e-08	0.0405357	8.08e-08	5.07447	Ptgs2	NM_011198
A_52_P425839	0.0250286	2.33596	0.0600811	2.37102	0.957821	5.58e-07	0.850887	1.03e-06	5.04888	Retnlg	NM_181596
A_51_P289796	0.0973099	2.33488	0.0684775	2.30604	0.529868	8.1e-10	0.587436	1.23e-09	5.04508	Arl4c	NM_177305
A_52_P194971	0.537913	2.3278	0.0246054	1.81449	0.0105152	2.27e-08	0.91346	3.57e-07	5.02039	Hoxb7	NM_010460
A_51_P141926	1.05093	2.31871	-0.278761	0.989022	1.02e-05	1.79e-09	0.0279697	4.61e-06	4.98886	Fxyd4	NM_033648
A_52_P309022	0.493965	2.31114	1.81832	3.6355	0.0897947	5.02e-07	6.35e-06	2e-08	4.96275	Dach1	NM_007826
A_52_P251623	0.116825	2.31026	0.0748197	2.26825	0.502994	6.97e-09	0.649682	2.46e-08	4.95972	BC057022	NM_001004180
A_52_P278354	1.03443	2.27834	0.423157	1.66707	3.79e-06	6.89e-10	0.000824495	1.27e-08	4.85121	Bmp7	NM_007557
A_51_P314669	-0.121255	2.2759	0.462179	2.85934	0.624279	1.1e-06	0.0252442	1.88e-07	4.843	Pnliprp2	NM_011128
A_51_P270904	0.197704	2.27059	0.87776	2.95065	0.26018	1.05e-07	0.000263557	2.17e-08	4.82521	9930023K05Rik	NM_172641
A_51_P303739	0.0567617	2.26156	-0.291972	1.91283	0.812646	1.32e-07	0.106326	6.66e-07	4.7951	Afap1l1	NM_178928
A_52_P423222	0.0555395	2.25254	0.266562	2.46356	0.913806	2.12e-06	0.373452	2.11e-06	4.76521	Nfe2l3	NM_010903
A_51_P184484	0.188973	2.24221	-0.93764	1.1156	0.30818	2.39e-08	7.47e-05	2.48e-05	4.73123	Mmp13	NM_008607
A_51_P435588	0.106619	2.23666	-0.994134	1.13591	0.608971	8.03e-09	1.13e-05	5.05e-06	4.71305	Sprr2d	NM_011470
A_51_P339540	0.412653	2.23311	0.466812	2.28727	0.0020075	2.78e-09	0.000616816	1.46e-09	4.70146	Cdkn1c	NM_009876
A_52_P48569	0.200824	2.23051	0.157418	2.1871	0.414636	3.79e-07	0.489672	3.45e-07	4.69299	Slc38a4	NM_027052
A_51_P352773	0.428112	2.22304	1.42578	3.2207	0.0226154	1.64e-08	1.23e-06	1.24e-09	4.66876	Defcr-rs7	NM_007848
A_52_P377941	0.135136	2.21854	0.0478475	2.13125	0.360684	4.22e-09	0.757427	1.74e-08	4.65421	Pkhd1	NM_153179
A_51_P424275	0.0467923	2.20493	0.105474	2.26361	0.925778	1.82e-06	0.748433	3.12e-06	4.61052	Mt4	NM_008631
A_51_P124665	0.656939	2.19864	-1.11084	0.430858	0.00187096	1.85e-07	7.25e-05	0.0211433	4.59047	Sprr2h	NM_011474
A_52_P203560	0.14772	2.19622	2.40263	4.45113	0.25013	7.23e-10	4.4e-09	1.24e-11	4.58276	Fzd10	NM_175284
A_51_P411061	0.73906	2.18999	0.5441	1.99503	2.9e-06	9.81e-11	6.35e-06	1.77e-10	4.56302	Lama5	XM_203796
A_51_P510891	-0.599353	2.18925	0.183138	2.97174	6.15e-06	5.76e-11	0.00888141	8.47e-12	4.56068	Afp	NM_007423
A_51_P174943	0.725271	2.16118	-0.366847	1.06906	6.42e-05	5.82e-09	0.00464819	1.02e-06	4.47281	Lamc2	NM_008485
A_52_P494168	0.0879898	2.16034	0.942798	3.01515	0.704408	9.85e-08	9.15e-05	4.88e-09	4.47019	9630019K15Rik	NM_178774
A_51_P282630	0.693783	2.13409	0.504595	1.9449	5.51e-06	1.22e-10	1.44e-05	2.55e-10	4.3896	Pacsin3	NM_030880
A_51_P474459	-0.29028	2.13261	0.0442958	2.46719	0.0212184	9.57e-10	0.723901	4.37e-10	4.38511	Socs3	NM_007707
A_51_P273433	0.217811	2.12729	0.343633	2.25311	0.359895	9.29e-08	0.0638109	1.06e-07	4.36895	Prkg2	NM_008926
A_52_P265542	0.54288	2.10964	-1.42768	0.139082	3.96e-05	2.51e-10	3.83e-08	0.112971	4.31585	Ppia	NM_008907
A_51_P235945	0.934509	2.10765	0.0895362	1.26268	2.01e-06	1.03e-09	0.341098	3.11e-08	4.30989	Hp	NM_017370
A_52_P183368	0.642453	2.10182	0.617184	2.07655	0.000530535	1.21e-08	0.000487648	4.23e-08	4.29251	Tbx3	NM_011535
A_52_P368690	0.878963	2.10094	0.538103	1.76008	0.0040968	3.57e-06	0.0430574	1.25e-05	4.2899	NA	TC1537769
A_52_P205255	0.103324	2.08473	0.232109	2.21352	0.770343	4.65e-07	0.310781	5.75e-07	4.24197	Adam11	BC054536
A_52_P108346	0.232293	2.07913	-0.522016	1.32482	0.168341	1.49e-08	0.000818746	1.91e-06	4.22553	Myc	NM_010849
A_52_P75777	-0.0249303	2.07646	-0.344805	1.75658	0.957438	1.42e-06	0.171779	1.32e-05	4.2177	NA	XM_283647
A_52_P523459	0.692352	2.07466	0.44111	1.82342	2.42e-05	4.89e-10	0.000202767	1.78e-09	4.21246	Cd44	NM_009851
A_51_P205209	0.462566	2.06508	1.07955	2.68206	0.142075	1.03e-05	0.00169258	1.03e-06	4.18456	Cd244	NM_018729
A_51_P519536	0.88967	2.06205	0.131898	1.30428	3.54e-05	3.24e-08	0.345874	1.36e-06	4.1758	Lamp2	NM_001017959
A_51_P156857	0.237503	2.06174	-0.052221	1.77202	0.0333938	1.7e-09	0.582803	3.31e-09	4.17491	2010002N04Rik	NM_134133
A_51_P346938	-0.374976	2.06073	-1.0122	1.4235	0.0403043	3.22e-07	0.000152368	8.08e-06	4.17197	Lrg1	NM_029796
A_51_P409349	-0.224205	2.04041	-0.409975	1.85464	0.399725	2.88e-07	0.0455772	1.36e-06	4.11363	Trim29	NM_023655
A_51_P492366	0.760064	2.03419	-0.0936854	1.18044	5.52e-06	2.49e-10	0.273092	2.72e-08	4.09593	Bmp7	NM_007557
A_51_P102096	0.14473	2.03162	-0.324591	1.56229	0.120355	1.82e-10	0.000585773	1.6e-09	4.08862	Myc	NM_010849
A_52_P103628	-0.243105	2.02495	-0.634136	1.63392	0.0922436	2.79e-08	0.000320286	1.09e-07	4.06979	NA	NAP103812-1
A_51_P201982	0.204111	2.02009	1.34445	3.16043	0.0434622	3.13e-10	3.33e-08	2.71e-11	4.05609	Angpt2	NM_007426
A_51_P341177	0.716827	2.01089	-0.0418696	1.2522	5.46e-06	1.9e-10	0.641388	9.74e-09	4.03031	Ddah2	NM_016765
A_51_P367720	-1.1717	2.00765	-1.18435	1.99501	8.98e-06	1.25e-08	1.77e-06	2.18e-08	4.02127	Clu	NM_013492
A_51_P171510	0.174185	2.00751	-2.45876	-0.625434	0.48257	1.36e-07	7.99e-08	0.00388812	4.02088	Olfr487	NM_001011811
A_52_P917226	-0.0817848	2.0075	1.06506	3.15435	0.726561	2.66e-08	8.97e-06	1.08e-09	4.02085	NA	BE371292
A_52_P373251	0.616179	1.99362	0.46579	1.84323	0.000520182	6.34e-09	0.00123118	1.97e-08	3.98234	Atp11a	BC036322
A_51_P472829	-0.501765	1.98449	1.00664	3.4929	0.000175394	4.71e-10	2.24e-07	1.5e-11	3.95723	2810003C17Rik	NM_145144
A_51_P423709	-0.207256	1.98038	0.806879	2.99451	0.472056	5.6e-07	0.00115343	3.14e-08	3.94597	AW125753	NM_029007
A_51_P493234	0.14277	1.97884	-0.214641	1.62143	0.235809	1.02e-09	0.0311781	7.54e-09	3.94176	Cp	NM_007752
A_51_P383032	0.290138	1.96831	0.274076	1.95225	0.457989	3.52e-05	0.43355	3.35e-05	3.9131	Clec4d	NM_010819
A_52_P1164839	-0.0190127	1.96762	1.24384	3.23047	0.917518	1.29e-09	1.45e-07	5.61e-11	3.91122	Onecut2	AK081290
A_52_P377791	-0.0513256	1.96018	-0.191212	1.82029	0.879932	2.89e-07	0.352117	1.13e-06	3.89109	Fxyd3	NM_008557
A_52_P410765	-0.252245	1.95216	-0.163383	2.04102	0.0103911	2.51e-10	0.0430361	2.64e-10	3.86953	Sema7a	NM_011352
A_52_P481319	0.952529	1.93301	-0.900148	0.0803349	1.55e-06	7.57e-10	1e-06	0.417091	3.81852	NA	XM_905637
A_52_P573255	-0.430061	1.92577	-0.235157	2.12067	0.000148755	1.79e-10	0.00350942	1.05e-10	3.79939	Cdc42ep1	NM_027219
A_51_P436068	0.0887907	1.92263	1.74091	3.57475	0.899999	0.00200653	0.00193196	1.11e-05	3.79114	Admr	NM_007412
A_51_P426270	-0.284013	1.9174	0.261292	2.46271	0.00423692	2.49e-10	0.00255912	5.9e-11	3.77742	Mgp	NM_008597
A_52_P421234	0.394817	1.91006	-0.15053	1.36471	0.0440172	4.54e-07	0.444267	5.57e-06	3.75824	Rdh10	NM_133832
A_52_P523368	-0.099151	1.90678	-0.179504	1.82643	0.614684	1.84e-08	0.194953	4.61e-08	3.74972	2310020A21Rik	NM_175249
A_51_P501145	0.559317	1.90669	1.06583	2.4132	0.000538577	4.26e-09	9.9e-07	9.81e-10	3.74949	Lef1	AK083328
A_51_P266861	0.412302	1.89396	0.0865178	1.56817	0.00169024	1.35e-09	0.408686	1.03e-08	3.71653	Mod1	NM_008615
A_52_P630867	-0.183113	1.87796	0.947254	3.00833	0.0391094	6.38e-10	4.85e-07	6.95e-11	3.67556	Abcc4	NM_001033336
A_52_P54463	1.38262	1.87208	-1.73733	-1.24787	1.19e-06	7.54e-09	4.67e-08	4.27e-07	3.6606	Klf5	BC006646
A_51_P226269	0.472441	1.87094	-1.01587	0.382623	3.43e-05	1.22e-10	3.83e-08	7.25e-05	3.6577	1190002H23Rik	NM_025427
A_51_P483438	0.0554279	1.86257	1.08771	2.89485	0.797283	1.63e-08	2.5e-06	7.17e-10	3.63654	Sema3e	NM_011348
A_52_P222230	0.074625	1.84996	-1.00037	0.774966	0.675586	7.37e-08	9.66e-06	6.98e-05	3.60491	NA	NM_001012326
A_51_P145541	1.12868	1.84942	-0.707419	0.0133243	2.42e-05	2.84e-07	0.000319378	0.932803	3.60356	Rbms1	NM_020296
A_51_P239750	0.227006	1.84637	0.377282	1.99664	0.0385726	3.62e-09	0.000413948	1.23e-09	3.59594	Inhba	NM_008380
A_51_P279154	0.0411678	1.84035	0.480864	2.28004	0.79138	4.28e-09	0.000422403	2.37e-09	3.58096	Bex1	NM_009052
A_52_P788556	0.130824	1.83511	-0.229033	1.47525	0.484315	2.73e-08	0.0974762	3.32e-07	3.56799	Zdhhc15	AK132304
A_51_P433228	0.650725	1.82357	-1.10079	0.0720582	0.00493251	5.18e-07	9.48e-05	0.772468	3.53956	Ccnd2	NM_009829
A_51_P291062	0.427231	1.82187	-0.868433	0.526205	0.000424747	6.17e-10	4.92e-07	3.63e-05	3.53539	Col16a1	NM_028266
A_52_P409833	0.260903	1.81512	0.837114	2.39133	0.160257	7.97e-08	7.56e-05	1.36e-08	3.51889	Plat	NM_008872
A_52_P700056	0.602557	1.80965	0.081671	1.28876	0.0173334	1.03e-06	0.746092	4.24e-05	3.50557	NA	BC089618
A_52_P545650	0.265546	1.80087	-0.422531	1.11279	0.304489	8.3e-06	0.0973341	0.000479371	3.48429	NA	AK132500
A_51_P432288	0.136362	1.7995	-0.14724	1.5159	0.415076	1.68e-08	0.259764	1.29e-07	3.481	Rnf183	NM_153504
A_52_P671812	0.645951	1.79776	-0.360148	0.791657	0.000361132	1.34e-08	0.0033137	3.45e-05	3.47679	NA	XM_912946
A_52_P598895	0.155314	1.7869	0.701067	2.33265	0.429334	6.47e-08	0.00021932	1.17e-08	3.45072	Npnt	NM_001029836
A_51_P466535	-0.0242298	1.78627	0.362903	2.1734	0.927867	7.24e-07	0.0212783	6.72e-08	3.44921	Ttc9	AK172918
A_52_P507736	0.391004	1.77397	0.351675	1.73464	0.0647927	6.35e-07	0.079657	3.18e-06	3.41994	Itgb8	XM_484197
A_51_P512992	-0.574843	1.7737	0.202938	2.55148	0.0723733	1.09e-05	0.492743	1.02e-06	3.4193	Entpd3	NM_178676
A_51_P215530	0.553214	1.76748	0.592041	1.80631	1.97e-05	2.49e-10	2.64e-06	2.81e-10	3.40458	Rnf180	AK032259
A_52_P220879	-0.621335	1.75043	-1.24111	1.13066	0.00138985	2.55e-07	6.26e-06	6.92e-06	3.3646	Tgm2	NM_009373
A_51_P511000	0.989072	1.74815	-0.329785	0.429296	0.0113931	0.000149322	0.371249	0.215084	3.35928	C130090K23Rik	NM_145560
A_51_P112223	0.378994	1.74614	-0.165654	1.20149	0.00889647	1.28e-07	0.152966	7.73e-07	3.3546	Gsta4	NM_010357
A_52_P653184	0.593524	1.746	3.25075	4.40322	3.43e-05	1.38e-09	9.68e-10	1.34e-11	3.35426	NA	ENSMUST00000085613
A_51_P186601	0.345865	1.74466	-0.0199462	1.37885	0.00363363	1.6e-09	0.865459	1.86e-08	3.35117	Mod1	M29546
A_51_P340255	0.432183	1.74365	0.95022	2.26169	6.95e-05	1.79e-10	4.99e-08	3.88e-11	3.34882	Nbea	Y18276
A_51_P218335	-0.265567	1.74129	1.65402	3.66088	0.0389302	6.22e-09	3.83e-08	3.88e-11	3.34335	Tbx1	NM_011532
A_51_P432820	-0.537768	1.7342	-0.812359	1.45961	0.000474012	5.82e-09	5.22e-06	4.11e-08	3.32695	NA	NM_001029848
A_51_P182371	0.342386	1.73068	1.61141	2.99971	0.00287332	7.07e-09	4.43e-08	1.03e-10	3.31885	Defcr-rs12	NM_007846
A_51_P429197	0.324224	1.72818	-0.601356	0.802602	0.00069117	1.99e-10	1.55e-06	1.43e-07	3.3131	Csnk1e	NM_013767
A_51_P181772	0.631559	1.71513	0.37666	1.46023	1.8e-05	7.17e-10	0.000247972	3.61e-09	3.28327	Ptpre	NM_011212
A_51_P288903	0.163114	1.71362	-2.04048	-0.489977	0.350354	4.32e-08	4.11e-08	0.0027768	3.27982	Aldoa-ps1	AK016920
A_51_P261087	0.00389999	1.70943	0.015079	1.72061	0.977766	4.75e-10	0.876405	5.73e-10	3.27031	Avpi1	NM_027106
A_52_P577484	0.286936	1.70442	-0.575055	0.842427	0.00506541	7.23e-10	8.66e-06	4.2e-07	3.25897	Sox9	NM_011448
A_51_P428372	0.0497088	1.70372	-0.455834	1.19818	0.78471	9.43e-09	0.00066787	3.34e-07	3.2574	Ppbp	NM_023785
A_52_P202358	-0.0612303	1.69891	-0.100111	1.66003	0.924082	0.000625365	0.82124	0.000371096	3.24656	Runx1	D13802
A_52_P514391	0.613714	1.6973	-0.689749	0.393838	0.0015146	7.65e-08	0.000194838	0.0151999	3.24294	Ccnd2	NM_009829
A_52_P59318	1.12279	1.69203	0.734696	1.30394	3.29e-07	6.38e-10	9.93e-07	7.12e-09	3.23112	Rdh10	NM_133832
A_52_P418791	-0.0678843	1.68981	-0.479741	1.27795	0.577252	1.19e-09	5.84e-05	1.88e-08	3.22614	Rbp1	NM_011254
A_52_P232813	-0.0118678	1.68829	0.228511	1.92867	0.958253	1.94e-08	0.0610223	1.07e-08	3.22274	Gm1960	NM_203320
A_52_P309381	1.12434	1.68565	0.381586	0.942899	0.000770391	5.98e-06	0.112902	0.00148497	3.21685	Cfh	NM_009888
A_51_P184928	0.0452026	1.67643	0.129448	1.76068	0.86589	1.56e-07	0.438542	2.04e-07	3.19637	Ifitm7	NM_028968
A_51_P260169	0.321062	1.67059	-0.649258	0.700275	0.00787411	1.94e-08	4.52e-05	1.53e-05	3.18346	Gstm5	NM_010360
A_51_P216108	-0.21248	1.66493	1.20097	3.07838	0.146908	2.28e-08	7.05e-07	2.81e-10	3.17099	Rps6kl1	NM_146244
A_51_P285725	0.028522	1.66468	-0.0776998	1.55846	0.840039	1.09e-09	0.380336	2.79e-09	3.17043	T	NM_009309
A_51_P254656	0.191772	1.66312	0.392389	1.86374	0.421321	1.46e-06	0.0222457	4.63e-07	3.16701	Hdc	NM_008230
A_52_P94941	-0.193959	1.66087	-0.124238	1.73059	0.174183	1.06e-07	0.371666	5.39e-08	3.16206	Gsdm1	NM_021347
A_51_P374707	0.374868	1.64605	0.446998	1.71818	0.00313988	1.25e-08	0.000406856	4.47e-08	3.12975	Tspan12	NM_173007
A_52_P15388	0.289439	1.64484	-0.734087	0.621315	0.0124055	3.25e-09	4.29e-06	2.44e-05	3.12713	Ltf	NM_008522
A_52_P508750	0.432661	1.64066	-2.26684	-1.05884	0.0872774	2.87e-06	4.23e-07	0.000256434	3.11809	Grn	NM_008175
A_51_P281878	0.693899	1.63872	-1.53664	-0.591818	6.9e-05	3.44e-08	1.54e-07	9.39e-05	3.1139	5730488B01Rik	AK017710
A_51_P372826	0.496414	1.63785	-0.103565	1.03787	0.00557465	9.16e-08	0.5062	9.52e-06	3.11202	Smox	NM_145533
A_52_P386558	0.274752	1.63645	1.12425	2.48596	0.0595615	2.81e-08	1.24e-06	1.51e-09	3.10901	Tanc2	AK019982
A_51_P223656	0.88756	1.63601	-0.659117	0.08933	0.00172767	9.52e-06	0.00807071	0.729774	3.10804	Lamb3	NM_008484
A_52_P106429	0.76696	1.63405	-0.223959	0.643133	1.96e-06	4.71e-10	0.00428565	1.64e-06	3.10383	Dnaja1	NM_008298
A_52_P238159	0.165434	1.62501	-0.292999	1.16658	0.122795	2.35e-09	0.00319667	6.21e-08	3.08444	ENSMUSG00000055697	AK050463
A_51_P152532	0.389612	1.62497	0.88954	2.1249	0.0136485	4.45e-08	1.16e-05	8.12e-09	3.08435	Rkhd3	XM_620516
A_51_P329928	-0.535001	1.62475	-0.395904	1.76385	9.68e-05	1.6e-09	0.000269522	1.28e-09	3.08389	Phlda3	NM_013750
A_51_P277745	0.11174	1.61887	0.283056	1.79018	0.458272	1.48e-08	0.0152211	1.05e-08	3.07133	Abcc2	NM_013806
A_52_P244702	-0.275528	1.61739	0.257934	2.15085	0.0113589	2.19e-09	0.00661744	3.57e-10	3.06819	Tcf7	NM_009331
A_51_P103237	-0.526725	1.61686	0.447429	2.59101	6.08e-05	9.74e-10	5.63e-05	4.72e-11	3.06706	Hunk	NM_015755
A_51_P498293	-0.342377	1.61231	0.955564	2.91025	0.194831	1.63e-05	0.00107409	1.14e-07	3.0574	AW125753	NM_029007
A_51_P429366	-0.392066	1.60843	-0.3246	1.6759	0.00327537	3.85e-08	0.00767008	1.96e-08	3.04921	Hes6	NM_019479
A_51_P107686	0.242223	1.60784	-0.554633	0.810984	0.466435	4.73e-05	0.048896	0.00588776	3.04795	Foxc1	NM_008592
A_52_P350786	-0.711183	1.59921	-0.632325	1.67807	1.79e-05	6e-09	5.22e-06	2.51e-09	3.02978	Phlda2	NM_009434
A_51_P290576	0.269481	1.59896	-0.577877	0.751601	0.0143496	2.78e-09	2.05e-05	3.1e-06	3.02925	Plk2	NM_152804
A_51_P120093	0.513378	1.59871	0.360259	1.4456	4.09e-05	2.56e-09	0.000337954	3.38e-09	3.02873	Snx10	NM_028035
A_51_P401907	0.078345	1.59818	0.222076	1.74191	0.808263	3.22e-06	0.332724	6.93e-06	3.02761	EG433016	AK089257
A_51_P474960	0.181571	1.59456	-0.470935	0.94205	0.162445	1.56e-08	0.000272622	3.72e-06	3.02001	Pitrm1	NM_145131
A_51_P156438	0.174953	1.59042	0.172634	1.5881	0.0581283	9.57e-10	0.0298493	1.38e-09	3.01138	Slc25a33	NM_027460
A_51_P150715	-0.0206485	1.58899	-0.488525	1.12111	0.952029	5.4e-06	0.0234711	7.61e-05	3.00839	2810404F17Rik	AK012982
A_51_P237593	1.08185	1.58898	0.366225	0.873352	2.53e-06	3.09e-08	0.00285877	2.81e-06	3.00836	Aplp2	NM_009691
A_52_P493925	-0.0544483	1.58843	0.031921	1.6748	0.788026	3.81e-08	0.837872	4.44e-08	3.00721	Nkd1	XM_909079
A_51_P104478	-0.060732	1.58811	0.616013	2.26486	0.931504	0.000438016	0.107192	5.7e-05	3.00656	Smpx	NM_025357
A_52_P229536	0.272453	1.58801	0.0724361	1.38799	0.0153282	3.62e-09	0.469917	1.78e-08	3.00634	Cd44	NM_009851
A_51_P350453	0.302176	1.58728	2.14208	3.42719	0.0912186	1.98e-07	5.24e-08	5.87e-10	3.00483	Pdk4	NM_013743
A_51_P489720	-0.0205349	1.58462	-0.143218	1.46194	0.921543	1.9e-08	0.217086	6.63e-08	2.99929	Slc16a11	NM_153081
A_51_P283590	0.8928	1.57687	0.357749	1.04182	0.000801077	5.18e-06	0.0372559	0.00024137	2.98322	Anxa1	NM_010730
A_51_P181891	-0.0431032	1.56821	0.993191	2.6045	0.866735	1.95e-07	1.45e-05	4.66e-09	2.96536	2600011E07Rik	NM_028113
A_52_P102248	0.314598	1.56635	0.983604	2.23536	0.0227199	2.28e-08	2.01e-06	2e-09	2.96154	Rkhd3	XM_620516
A_51_P373082	-0.0420881	1.56541	-0.125053	1.48244	0.707996	6.77e-10	0.0885838	1.42e-09	2.95961	Bok	NM_016778
A_51_P216679	0.00481765	1.56142	-0.953797	0.602808	0.976578	2.82e-09	3.7e-07	1.77e-05	2.95145	Anxa10	NM_011922
A_51_P484158	-0.381592	1.56132	-0.400324	1.54259	0.00580234	3.74e-07	0.00327404	3.15e-07	2.95123	Steap1	NM_027399
A_52_P91604	0.213267	1.56057	-0.532647	0.814655	0.117786	3.1e-07	0.00163158	6.34e-05	2.9497	Gsr	NM_010344
A_52_P21574	-0.187897	1.55503	-0.313183	1.42974	0.0753302	3.21e-09	0.00192994	1.01e-08	2.93839	Pdlim7	AK010339
A_51_P359625	0.226042	1.55344	-0.61758	0.709823	0.0140015	2.33e-09	1.05e-05	3.77e-06	2.93517	Gsr	NM_010344
A_52_P384264	0.203006	1.54628	0.825805	2.16908	0.0365313	1.59e-09	5.79e-07	2.04e-10	2.92063	Zfp185	NM_009549
A_52_P681310	0.620069	1.54456	-0.800944	0.123542	0.00130541	1.49e-07	5.54e-05	0.45643	2.91714	Plaur	NM_011113
A_52_P534250	0.0992985	1.5429	1.09481	2.53841	0.686401	4.63e-07	1.34e-05	1.25e-08	2.9138	Rbms3	NM_178660
A_52_P496772	0.0648839	1.54281	0.771132	2.24906	0.541735	7.07e-09	2.51e-06	2.97e-10	2.91361	Vangl2	BC075636
A_51_P218975	1.10852	1.54212	-0.156254	0.277337	1.52e-06	8.33e-09	0.120285	0.0141353	2.91221	Kcns3	NM_173417
A_52_P479269	0.635797	1.54101	-0.113721	0.79149	0.000197123	2.16e-08	0.334436	1.33e-05	2.90998	Sdc1	NM_011519
A_52_P297724	0.118697	1.54023	0.502526	1.92406	0.394148	1.44e-08	0.000222824	3.6e-09	2.90841	Dusp14	NM_019819
A_51_P208603	0.0389901	1.52986	-0.199612	1.29126	0.719472	5.99e-10	0.00749721	3.1e-09	2.88758	Dio2	NM_010050
A_51_P387239	0.901694	1.52431	-0.658821	-0.0362019	0.00435701	1.87e-05	0.0112345	0.914579	2.8765	Iigp1	NM_021792
A_52_P53906	0.377623	1.52353	-0.948474	0.197432	0.00499173	1.5e-08	1.42e-06	0.0881946	2.87493	Ccnd2	NM_009829
A_51_P245796	0.178872	1.52201	0.115384	1.45852	0.394206	4.85e-06	0.603127	1.11e-05	2.87191	Ddit4	NM_029083
A_51_P439085	0.300446	1.522	-0.338293	0.883266	0.0162547	3.44e-07	0.00680707	1.12e-05	2.8719	2310016C08Rik	NM_023516
A_52_P562661	0.175843	1.52179	0.409063	1.75501	0.379949	3.29e-07	0.0113447	1.96e-07	2.87147	Mal	NM_010762
A_51_P345274	0.00140641	1.51653	-0.16671	1.34842	0.992292	1.08e-09	0.031029	4.18e-09	2.86103	Onecut2	NM_194268
A_52_P153700	0.086464	1.50753	-0.191639	1.22942	0.37798	1.08e-09	0.0145924	8.71e-09	2.84322	Phldb2	NM_153412
A_52_P273177	0.635062	1.50686	0.109305	0.981103	2.4e-05	1.11e-08	0.228139	2.18e-07	2.84191	Kif5b	NM_008448
A_51_P320614	0.39617	1.50635	-0.636288	0.473887	0.00287601	6.6e-08	4.76e-05	0.000493347	2.8409	Txnrd1	NM_015762
A_52_P317730	0.373032	1.49856	-0.683699	0.441833	0.00024405	5.56e-10	5.94e-07	2.65e-05	2.82561	NA	TC1416257
A_52_P230778	0.418748	1.49765	0.424929	1.50383	0.000556825	2.98e-09	0.000146735	4.38e-09	2.82383	Gtf2h5	NM_181392
A_51_P365152	0.0247168	1.49597	0.343912	1.81516	0.948492	4.71e-06	0.0971351	1.92e-06	2.82053	Hs3st1	NM_010474
A_51_P159612	-0.469136	1.49098	0.141278	2.1014	0.0005609	7.71e-09	0.143059	7.7e-10	2.81081	Hebp2	NM_019487
A_51_P490023	0.324037	1.48962	0.373797	1.53938	0.032527	8.34e-08	0.00629745	1.17e-07	2.80815	Tubb2a	NM_009450
A_51_P473953	-0.0238331	1.48903	0.722647	2.23551	0.85608	1.31e-09	9.81e-07	1.04e-10	2.80701	4631416L12Rik	AK144976
A_51_P148814	0.415376	1.4839	-0.311477	0.757043	0.00303592	1.04e-07	0.0124977	1.82e-05	2.79703	Ly6e	NM_008529
A_52_P496775	0.0888035	1.48196	0.444842	1.83799	0.419338	2.66e-09	8.48e-05	7.39e-10	2.79327	Vangl2	BC075636
A_52_P485939	-0.106832	1.48186	1.0427	2.63139	0.505686	4.13e-08	1.47e-06	6.35e-10	2.79308	Slc39a8	NM_026228
A_52_P128283	0.794341	1.48012	-0.0292208	0.656562	1.6e-05	1.19e-08	0.812491	2.41e-05	2.78973	NA	NM_001033135
A_51_P337771	-0.0727366	1.47626	0.906556	2.45555	0.77437	1.28e-06	3.67e-05	1.68e-08	2.78226	Pcdhb17	NM_053142
A_51_P212754	1.02618	1.47527	-0.517435	-0.0683435	3.07e-05	2.16e-07	0.00146725	0.70004	2.78036	Tgfbi	NM_009369
A_52_P61549	0.547879	1.47488	-0.338946	0.588059	0.000243161	1.21e-08	0.00238135	6.12e-05	2.77961	NA	ENSMUST00000078613
A_51_P394354	0.2096	1.47434	-0.119116	1.14562	0.160458	7.33e-08	0.363422	1.24e-06	2.77857	5730469M10Rik	NM_027464
A_52_P48155	0.302437	1.47393	-0.530771	0.640723	0.0132504	3.38e-07	0.000395715	8.02e-05	2.77778	Eif5a	NM_181582
A_51_P424272	-0.0864104	1.47243	-0.116084	1.44276	0.726462	5.52e-07	0.504989	1.4e-06	2.77489	Mt4	NM_008631
A_52_P312467	0.092484	1.46786	0.861385	2.23676	0.527292	1.96e-08	2.9e-06	1.02e-09	2.76611	Hoxb3	TC1432492
A_51_P287698	0.823331	1.46273	-0.168304	0.471097	3.15e-05	2.79e-08	0.0882241	0.000828926	2.7563	Ext1	AK035950
A_52_P375312	0.521218	1.46064	-0.247738	0.691686	0.0988424	8.23e-05	0.326739	0.0129453	2.75231	Amica1	NM_001005421
A_52_P683895	0.602546	1.45825	-0.44971	0.405993	0.00302307	5.36e-07	0.00709696	0.0203968	2.74775	EG277333	NM_199472
A_51_P144222	-0.203318	1.45631	-0.475028	1.1846	0.187765	9.96e-08	0.00126695	1.16e-06	2.74405	Otop2	NM_172801
A_52_P542970	0.660059	1.45359	0.0685138	0.862041	0.00014823	3.44e-08	0.589316	6.36e-06	2.73888	NA	NAP018852-001
A_51_P456466	-0.0714043	1.44858	-0.330275	1.18971	0.761262	3.34e-07	0.0275358	3.92e-06	2.72939	Mlxipl	NM_021455
A_51_P395921	0.373258	1.44721	-0.314478	0.759473	0.000505963	1.35e-09	0.000545182	5.54e-07	2.7268	Uchl4	NM_033607
A_51_P429276	0.781545	1.44524	0.459096	1.12279	6.62e-06	4.75e-09	9.39e-05	6.52e-08	2.72308	Tmod3	NM_016963
A_51_P303061	-0.00361883	1.44452	0.022095	1.47023	0.993604	2.48e-05	0.947176	4.9e-05	2.72172	Adcy8	NM_009623
A_52_P379337	0.663575	1.44161	0.150266	0.928306	2.41e-06	4.89e-10	0.0224386	2.43e-08	2.71625	Rtn4	NM_194054
A_52_P262883	-0.156786	1.43982	-0.00901572	1.58759	0.0717741	8.24e-09	0.934931	2.45e-09	2.71287	Ppp1r14b	NM_008889
A_51_P425080	0.301999	1.43275	-1.83547	-0.704727	0.0753209	7.09e-07	1.25e-07	0.000174816	2.6996	Hdgf	NM_008231
A_51_P302458	0.349984	1.4282	-0.1157	0.962518	0.022438	1.16e-07	0.393458	7.36e-06	2.69111	Plscr3	NM_023564
A_51_P515768	-0.0594663	1.42779	-0.249542	1.23771	0.739296	4.41e-08	0.030793	2.87e-07	2.69034	Pdlim7	AK010339
A_51_P331059	-0.0224908	1.4232	0.608656	2.05435	0.903411	2.79e-08	3.23e-05	5.17e-09	2.6818	Tex15	NM_031374
A_52_P376574	-0.0299404	1.4227	0.113866	1.5665	0.817023	6.47e-09	0.199139	9.04e-09	2.68086	Pcsk6	XM_355911
A_52_P202276	0.206515	1.42057	0.56803	1.78208	0.0743619	1.4e-08	4.37e-05	3.37e-09	2.67691	BC057079	AK122556
A_52_P555089	0.184453	1.42057	-1.50581	-0.269698	0.0680402	4.68e-09	1.95e-08	0.0065916	2.67691	NA	NAP112590-1
A_51_P284577	0.434875	1.41956	-0.549408	0.435281	0.00154584	1.96e-08	8.05e-05	0.00083437	2.67505	Hyal2	NM_010489
A_51_P411007	0.164319	1.41938	-0.49579	0.759267	0.048931	1.03e-09	9.61e-06	3.18e-07	2.6747	Cdk2ap1	NM_013812
A_52_P479958	0.592009	1.41935	-0.464423	0.362918	0.0131162	4.6e-06	0.020773	0.0892497	2.67465	LOC380687	NM_001001978
A_51_P323299	0.123568	1.41669	-0.915404	0.377719	0.43231	3.81e-07	1.88e-05	0.00710617	2.66973	Trim28	NM_011588
A_51_P408506	-0.345805	1.41389	-0.299809	1.45989	0.0347969	4.98e-07	0.0351128	2.52e-06	2.66455	Icam1	BC008626
A_52_P149521	0.0556511	1.4126	0.792859	2.1498	0.894365	4.6e-05	0.00176524	1.33e-06	2.66216	Syt16	NM_172804
A_52_P200925	0.551858	1.41172	-0.436815	0.423045	0.00137443	1.29e-07	0.00227017	0.00480707	2.66054	NA	NAP061138-1
A_51_P450623	-0.602909	1.41155	-0.568063	1.44639	3.41e-05	7.65e-09	3.19e-05	2e-08	2.66023	Phlda2	NM_009434
A_52_P21	0.0510408	1.40646	-0.33506	1.02036	0.821797	2.2e-07	0.0167499	7.39e-06	2.65085	Ttc9	NM_001033149
A_51_P265137	0.728418	1.40623	0.253863	0.931671	2.05e-05	1.21e-08	0.0110222	7.34e-07	2.65043	Tcf4	NM_013685
A_51_P322482	0.0453696	1.40514	0.0383599	1.39814	0.808032	4.73e-08	0.779975	9.2e-08	2.64844	Pkhd1	AK052698
A_52_P1189908	-0.198248	1.40403	-0.46534	1.13693	0.105647	2.29e-08	0.000314153	2.6e-07	2.64639	Sox9	BI793804
A_52_P362111	-0.157452	1.40301	0.218116	1.77858	0.0557665	1.03e-09	0.00412043	2.64e-10	2.64454	D6Wsu176e	NM_138587
A_52_P12840	-0.135576	1.40136	0.932521	2.46946	0.472003	2.9e-07	1.44e-05	4.27e-09	2.64151	BC037703	NM_172295
A_52_P103391	1.03166	1.40044	0.0416781	0.410451	9.61e-06	9.08e-08	0.77765	0.00415537	2.63981	B4galt1	NM_022305
A_52_P95161	0.988454	1.39989	-0.431228	-0.0197942	0.000912468	1.19e-05	0.0474274	0.947496	2.63881	Clca6	NM_207208
A_52_P424847	0.465264	1.39768	0.279336	1.21175	0.0135113	2.86e-06	0.0496011	2e-05	2.63477	Tcf4	NM_013685
A_51_P489779	0.294837	1.39733	0.372297	1.47479	0.00387623	7.07e-09	0.000590947	1.44e-08	2.63413	Cdk6	AK030810
A_51_P482503	-0.782265	1.39711	-0.862322	1.31705	5.3e-05	7.73e-08	8.87e-06	6.77e-07	2.63373	Tpd52l1	NM_009413
A_51_P281930	0.695364	1.39707	0.112773	0.814483	0.000252702	1.37e-07	0.40547	3.04e-05	2.63367	Hsdl2	NM_024255
A_52_P18116	-0.0409832	1.39703	0.0501598	1.48817	0.931213	5.03e-05	0.878618	6.79e-05	2.63358	Ccl24	NM_019577
A_51_P149455	1.01888	1.39666	-0.0691888	0.308586	2.41e-07	9.05e-10	0.330589	0.000507738	2.63291	Acadl	NM_007381
A_52_P220176	0.637163	1.39648	1.14537	1.90468	0.000495609	1.43e-07	1.41e-06	1.88e-08	2.63259	Dkk3	NM_015814
A_52_P293232	0.417337	1.39647	0.321729	1.30087	0.000373645	3.32e-09	0.000776941	9.35e-09	2.63257	Mesdc1	NM_030705
A_51_P369683	0.957368	1.39274	0.666788	1.10216	2.37e-06	7.03e-09	3.36e-06	1.41e-07	2.62577	Dhx9	NM_007842
A_52_P541802	0.020054	1.39053	0.25684	1.62732	0.94918	3.42e-06	0.188821	4.08e-06	2.62176	Ifitm1	NM_026820
A_52_P221024	0.548267	1.39021	-0.299295	0.542645	0.000598264	2.22e-07	0.0184294	0.000325126	2.62116	NA	XM_619301
A_52_P664899	0.275416	1.38938	0.686905	1.80087	0.0470424	7.37e-08	4.05e-05	1.44e-08	2.61966	Elavl2	NM_207685
A_52_P498743	0.352835	1.38938	-0.428039	0.608501	0.000991953	1.37e-08	0.000175038	7.11e-06	2.61965	NA	XM_894692
A_51_P356467	0.351846	1.38215	0.0504423	1.08074	0.0983045	2.81e-06	0.820753	5.16e-05	2.60656	Cldn4	NM_009903
A_52_P299446	0.770603	1.38171	0.0435098	0.654615	0.00627293	1.86e-05	0.880327	0.0106079	2.60577	NA	XM_895740
A_52_P21459	0.733251	1.38158	-0.37202	0.276308	8.24e-06	5.18e-09	0.000366017	0.00512883	2.60553	Tmem176b	NM_023056
A_52_P658122	0.582043	1.37731	0.256365	1.05163	1.09e-05	1.13e-09	0.0013614	1.65e-08	2.59784	Ets2	NM_011809
A_52_P458177	0.178456	1.37652	0.489468	1.68753	0.41921	1.38e-05	0.0238052	5.09e-06	2.59641	Ubie	AB099518
A_51_P350294	0.0238342	1.37509	0.256663	1.60792	0.972486	0.000990594	0.527428	0.000679869	2.59384	Slc9a3	XM_127434
A_51_P439626	0.865152	1.37457	-1.03078	-0.521366	8.39e-07	1.28e-09	4.6e-08	8.82e-06	2.59291	Map2k2	NM_023138
A_52_P460957	0.417521	1.37315	0.456681	1.41231	0.00216369	2.74e-08	0.000359702	3.88e-08	2.59036	Crem	NM_013498
A_51_P203620	-0.173776	1.37226	0.658076	2.20411	0.309547	5.62e-07	0.00054165	4.91e-08	2.58875	Slc18a1	NM_153054
A_51_P164203	-0.568778	1.37107	0.220459	2.1603	5.56e-05	5.34e-09	0.00602637	5.24e-10	2.58662	Nme4	NM_019731
A_52_P796840	0.992919	1.37028	0.765397	1.14276	0.00364146	0.000222854	0.0126122	0.000801541	2.58521	BC026782	NM_001025575
A_52_P651987	0.122009	1.36718	0.0942948	1.33946	0.231074	8.7e-08	0.377175	1.41e-07	2.57966	Ypel1	NM_023249
A_51_P247799	0.737896	1.36677	-0.719658	-0.0907823	3.34e-05	5.09e-08	5.28e-06	0.367359	2.57893	Casp8	NM_009812
A_52_P536494	0.598665	1.36513	1.57737	2.34384	0.000425194	8.77e-08	8.23e-08	1.61e-09	2.576	Mycn	NM_008709
A_52_P676271	0.154579	1.36325	-0.575764	0.632904	0.496371	1.64e-06	0.0021113	0.0018972	2.57264	Tuba4a	NM_009447
A_51_P486190	0.254995	1.36284	-0.502953	0.604897	0.011929	5.07e-09	3.06e-05	9.65e-06	2.57192	Pabpc2	NM_011033
A_51_P155458	-0.27981	1.36246	0.569003	2.21127	0.314746	1.76e-05	0.0130777	5.82e-07	2.57123	Dok7	BC089590
A_52_P214630	-0.128884	1.3615	0.487048	1.97743	0.387226	7.1e-08	0.000480842	5.14e-09	2.56951	Sox9	NM_011448
A_51_P119055	0.726485	1.36127	0.451875	1.08666	1.58e-05	1.11e-08	0.000150631	1.3e-07	2.56912	Ssb	NM_009278
A_52_P430194	0.434151	1.3611	0.369357	1.29631	0.00258828	5.09e-08	0.00260886	1.45e-07	2.56881	Smox	AK087437
A_51_P186053	0.0093998	1.35991	-0.996579	0.353927	0.948958	3.76e-09	1.29e-07	0.000599043	2.56668	Rrp15	NM_026041
A_51_P312121	1.97331	1.35873	-1.72898	-2.34356	1.04e-07	9.14e-08	4.44e-08	1.61e-09	2.56459	Xdh	NM_011723
A_52_P491569	0.133345	1.35598	-0.781992	0.440639	0.442748	2.15e-06	3.24e-05	0.00309918	2.5597	1700017B05Rik	AK006055
A_52_P594768	0.257155	1.3554	-0.519621	0.578623	0.437436	5.23e-05	0.0393004	0.0354287	2.55868	Aprt	NM_009698
A_52_P107542	0.323688	1.35534	-0.538731	0.492918	0.0232981	1.02e-07	0.000304249	0.00102372	2.55857	Ccdc64	BC024804
A_52_P644984	0.60734	1.3552	-0.358202	0.389654	0.000919159	4.72e-07	0.00544116	0.00528308	2.55832	NA	ENSMUST00000080662
A_51_P234044	0.0242926	1.35504	-0.772634	0.558115	0.8511	7.84e-09	2.44e-06	3.39e-05	2.55804	1190005I06Rik	NM_197988
A_52_P151320	-0.295022	1.35309	0.0559537	1.70406	0.0460837	3.11e-07	0.735036	1.92e-07	2.55458	Tnfaip8l1	NM_025566
A_51_P178131	0.081314	1.35027	0.201949	1.4709	0.810589	1.03e-05	0.347368	1.1e-05	2.5496	Muc16	AK003577
A_51_P512519	0.789575	1.34986	0.330888	0.891176	0.00342259	1.24e-05	0.115127	0.000823867	2.54888	EG214403	NM_001029977
A_51_P297579	0.645596	1.34977	-0.54559	0.158582	1.78e-05	5.31e-09	1.56e-05	0.0786548	2.54871	Gch1	NM_008102
A_51_P137336	1.436	1.34788	-0.519709	-0.607832	9.73e-07	6.53e-08	0.000190397	0.000142714	2.54537	Cdh1	NM_009864
A_52_P555723	0.418502	1.34527	0.256378	1.18315	0.00190155	2.81e-08	0.0149324	1.58e-07	2.54078	Ywhag	NM_018871
A_52_P607060	-0.12558	1.34507	0.649254	2.1199	0.745654	4.85e-05	0.0114067	2.17e-06	2.54042	Nebl	AK042301
A_52_P481320	0.346041	1.34506	-0.941235	0.0577864	0.000453099	1.23e-09	7.02e-08	0.471788	2.54041	NA	XM_905637
A_52_P535084	0.314369	1.34383	0.0334282	1.06289	0.0037547	6.68e-09	0.742476	8.04e-08	2.53825	NA	NAP030857-1
A_51_P417077	0.288377	1.34369	0.321152	1.37646	0.0214307	3.55e-08	0.00459957	5.25e-08	2.53799	Vill	NM_011700
A_52_P470663	0.740072	1.34233	0.808855	1.41111	0.00032245	6.21e-07	0.000114146	1.74e-06	2.5356	NA	TC1429930
A_52_P335218	0.19829	1.34214	0.454229	1.59808	0.0354495	2.36e-08	0.000154242	4.03e-09	2.53527	NA	XM_885734
A_51_P125629	-0.5699	1.34192	0.569763	2.48158	1.79e-05	2.04e-09	4.11e-06	3.88e-11	2.53489	Rgs12	NM_173402
A_52_P147426	0.496607	1.34049	-0.180554	0.663325	0.00801648	4.9e-06	0.259993	0.00142542	2.53237	NA	XM_917294
A_51_P262766	-0.0463396	1.33976	-0.226153	1.15995	0.730928	7.87e-09	0.0121434	4.5e-08	2.53109	Ccnd1	NM_007631
A_52_P57013	-0.323222	1.33898	-0.563299	1.0989	0.0076361	2.08e-08	4.44e-05	2.09e-07	2.52972	Nxn	NM_008750
A_51_P108051	0.354612	1.33886	-0.787246	0.197003	0.0011186	4.22e-09	6.76e-07	0.02603	2.52952	Psmc4	NM_011874
A_52_P380114	0.213309	1.337	1.35925	2.48294	0.0198232	2.89e-09	1.86e-08	4.72e-11	2.52625	Ccdc46	NM_029586
A_52_P560146	-0.188896	1.33599	1.82627	3.35116	0.0193085	1.08e-09	1.86e-09	3.95e-12	2.52449	Gm22	XM_111398
A_51_P223665	0.159142	1.33573	-0.272713	0.90388	0.459194	1.42e-06	0.0902606	8.87e-05	2.52404	Erh	NM_007951
A_51_P514300	-0.0823408	1.33454	-0.843061	0.573824	0.543347	2.14e-08	1.8e-06	6.1e-05	2.52196	Tuba4a	NM_009447
A_51_P475891	0.423415	1.33443	-0.723797	0.187216	0.000681324	1.06e-08	2.87e-06	0.0542831	2.52175	Trspap1	NM_027925
A_51_P108701	0.487683	1.33177	-0.325623	0.518469	7.15e-05	2.78e-09	0.000431876	1.63e-05	2.51712	Psmc2	NM_011188
A_51_P240801	-0.836116	1.32966	0.0778565	2.24363	5.22e-05	1.63e-07	0.575166	3.48e-09	2.51343	2610307O08Rik	BC046640
A_52_P349939	0.495273	1.32676	-0.70327	0.128215	0.000604698	3.3e-08	1.13e-05	0.26044	2.50838	Eno1	NM_023119
A_51_P340829	0.540435	1.32663	-0.158423	0.627771	0.000128363	2.56e-08	0.0470364	7.7e-06	2.50816	AA986860	NM_177604
A_52_P650215	-0.0415468	1.32269	-0.278364	1.08587	0.770177	1.09e-08	0.00395322	9.91e-08	2.50131	Nol14	NM_029278
A_52_P10458	0.0238181	1.32046	-0.0838445	1.2128	0.91041	1.11e-07	0.516877	4.54e-07	2.49746	Skp1a	NM_011543
A_52_P537050	0.206142	1.31932	-0.336734	0.776444	0.168033	1.79e-07	0.0100124	3.7e-05	2.49548	Uchl3	NM_016723
A_51_P447835	0.602227	1.3166	-0.208249	0.506121	0.000170738	4.32e-08	0.0482225	0.000308438	2.49078	Pla2g7	NM_013737
A_51_P436652	0.187549	1.31534	0.167526	1.29531	0.0676156	5.65e-08	0.0849458	4.48e-08	2.4886	Ccl7	NM_013654
A_51_P440004	0.705023	1.31478	-0.456802	0.152954	1.01e-05	7.07e-09	6.88e-05	0.093112	2.48764	Gspt1	NM_146066
A_51_P456657	-0.12371	1.31448	0.707186	2.14538	0.183884	3.76e-09	1.14e-06	1.46e-10	2.48713	Tgif2	NM_173396
A_52_P55489	0.159586	1.31321	-1.44056	-0.286934	0.176785	2.58e-08	4.44e-08	0.0102494	2.48494	NA	NAP114978-1
A_52_P92404	0.53379	1.31258	-0.816178	-0.0373833	0.0028961	7.4e-07	0.000106426	0.846659	2.48386	NA	XM_889945
A_52_P446364	0.277766	1.31253	-0.487091	0.547675	0.0584834	1.89e-07	0.000883477	0.000639731	2.48377	Lgi2	AK122570
A_52_P12877	0.449698	1.31181	-0.640967	0.221146	0.00157463	5.05e-08	3.18e-05	0.0570232	2.48253	Hspa8	NM_031165
A_51_P314168	-0.188214	1.30863	-0.417694	1.07915	0.376115	2.03e-06	0.0141916	2.37e-05	2.47706	Qtrt1	NM_021888
A_52_P601446	0.0774343	1.30824	0.0618424	1.29265	0.614905	5.33e-08	0.609318	1.11e-07	2.4764	Trim27	AK049314
A_51_P148311	0.460396	1.30639	0.986542	1.83254	0.0243277	2.95e-06	4.49e-05	3.25e-07	2.47322	Chic2	NM_028850
A_51_P379798	0.0809072	1.30632	-0.366028	0.859383	0.318294	9.55e-10	4.86e-05	4.54e-08	2.4731	Fdps	NM_134469
A_51_P190740	0.469075	1.30469	-0.283286	0.552333	0.0010016	4.35e-08	0.00962086	0.000142193	2.47031	Adssl1	NM_007421
A_51_P240594	0.324912	1.3046	-0.377341	0.602344	0.00196903	5.05e-09	0.00020399	6.82e-06	2.47015	Zfp7	NM_145916
A_52_P351116	0.565802	1.30426	-0.19717	0.541291	0.01703	9.61e-06	0.337235	0.0143997	2.46958	NA	TC1481003
A_51_P216303	-0.0756527	1.30249	-0.140757	1.23739	0.602226	2.14e-07	0.223944	2.41e-07	2.46654	Mmp14	NM_008608
A_52_P208521	-0.660314	1.29947	1.6372	3.59699	1.98e-05	1.56e-08	3.07e-08	3.88e-11	2.46139	Ndg1	NM_183322
A_52_P547000	0.544313	1.29885	-0.543661	0.210874	0.00521866	1.27e-06	0.00183461	0.215431	2.46032	NA	XM_892996
A_52_P120424	0.334764	1.2988	-0.905081	0.0589535	0.00184166	6.13e-09	2.76e-07	0.541076	2.46024	Vcp	NM_009503
A_52_P199058	0.315299	1.29849	-0.0738782	0.909312	0.00413682	1.09e-07	0.494631	2.25e-06	2.45971	Khdrbs1	NM_011317
A_51_P134533	0.63249	1.29794	-1.14811	-0.482664	0.000628328	3.23e-07	1.65e-06	0.00237864	2.45877	S100a16	NM_026416
A_52_P483900	0.314344	1.29761	-0.691973	0.291294	0.0429977	5.66e-06	0.000660169	0.0426366	2.45821	NA	ENSMUST00000080540
A_51_P169476	0.202472	1.29535	-0.719232	0.373645	0.110268	6e-08	1.34e-05	0.00336123	2.45436	Mcpt1	NM_008570
A_51_P316951	-0.0210957	1.29483	1.21089	2.52682	0.903103	2.63e-08	1.29e-07	2.23e-10	2.45349	Wipf3	XM_620310
A_51_P158161	0.201936	1.29407	-0.134492	0.957638	0.0600185	9.21e-08	0.189449	7.53e-07	2.45218	Mrto4	NM_023536
A_51_P281835	0.219767	1.29295	-0.711315	0.361872	0.181309	4.58e-07	9.99e-05	0.0178069	2.45029	2610204M08Rik	NM_198411
A_51_P176154	0.222826	1.2918	0.349529	1.41851	0.418882	2.91e-05	0.139221	6.19e-05	2.44834	Sirpb1	AK054545
A_52_P35801	0.157227	1.29148	-0.4611	0.673156	0.359596	8.09e-07	0.0051284	0.000588419	2.4478	Marcksl1	NM_010807
A_51_P200622	0.833235	1.28856	-0.587816	-0.132487	0.000295802	1.51e-06	0.00116507	0.467094	2.44285	Bloc1s2	BC065806
A_51_P132978	0.191924	1.2884	-0.695087	0.401388	0.0281992	2.93e-09	9.18e-07	0.000113333	2.44257	Idh1	NM_010497
A_51_P174653	0.318407	1.28802	0.131477	1.10109	0.0111932	4.31e-08	0.206905	3.17e-07	2.44193	Tera	NM_019643
A_51_P145132	0.542083	1.28742	-0.573923	0.171418	0.0561357	5.9e-05	0.0201471	0.551127	2.44092	Mcpt4	NM_010779
A_51_P162624	0.189091	1.28734	-1.1773	-0.0790519	0.0497445	7.03e-09	4.67e-08	0.398561	2.44078	Sac3d1	NM_133678
A_51_P297993	-0.0530548	1.2858	-0.421841	0.917016	0.707067	1.86e-08	0.000275184	6.24e-07	2.43818	NA	A_51_P297993
A_51_P310135	0.20379	1.28576	0.760065	1.84204	0.0193873	2.63e-09	4.42e-07	2.64e-10	2.43811	Tcf12	NM_011544
A_51_P222936	-0.00911469	1.28399	0.121581	1.41468	0.938208	9.57e-10	0.0553098	6.42e-10	2.43511	Fmnl2	AK080318
A_52_P406828	0.450062	1.28374	-0.908331	-0.0746517	0.00759005	4.64e-07	1.38e-05	0.65532	2.4347	BC068171	XM_289923
A_51_P199716	0.291201	1.28097	-0.118192	0.871579	0.00996464	1.86e-08	0.205197	9.44e-07	2.43003	Tle1	U61362
A_52_P235319	0.897382	1.28012	0.825254	1.20799	2.05e-06	1.01e-08	7.51e-07	2.72e-08	2.42859	Ptpre	NM_011212
A_51_P497451	0.258931	1.27944	0.994723	2.01524	0.051956	2.5e-07	5.67e-06	5.11e-08	2.42745	Rbms3	NM_178660
A_51_P224164	-0.321113	1.27922	0.499137	2.09947	0.273957	5.3e-05	0.0364772	1.69e-06	2.42708	Slc26a4	NM_011867
A_51_P405766	-0.409056	1.27902	-0.248192	1.43989	9.43e-05	1.27e-09	0.00113412	7.69e-10	2.42675	Dtymk	NM_023136
A_51_P224843	0.5262	1.27873	-0.329336	0.423194	0.00623255	1.33e-05	0.045109	0.0124351	2.42625	Tmsb4x	NM_021278
A_52_P614198	0.110327	1.27341	-1.61239	-0.449303	0.508501	4.46e-07	3.94e-07	0.00496969	2.41733	Trav14-2	XM_489762
A_52_P633128	0.294324	1.27303	0.174616	1.15332	0.0173258	2.41e-07	0.124169	4.05e-07	2.41669	Aasdhppt	NM_026276
A_51_P145402	0.185171	1.27281	-0.538775	0.548866	0.0845888	1.81e-08	3.67e-05	4.93e-05	2.41632	Tuba3a	NM_009446
A_51_P343517	0.0520709	1.27208	-0.440441	0.779563	0.874539	9.4e-06	0.0238824	0.00112078	2.41509	Ly6d	NM_010742
A_51_P139678	-0.132485	1.27202	-1.2991	0.105406	0.499846	4.14e-06	5.66e-06	0.538002	2.41499	Sprr1a	NM_009264
A_52_P244193	0.0828218	1.2717	0.262131	1.45101	0.658631	9.16e-07	0.0209885	5.42e-07	2.41446	Cd24a	NM_009846
A_51_P181705	0.395896	1.27169	0.00785038	0.883646	0.0186862	2.83e-06	0.970988	4.5e-05	2.41444	5430405N12Rik	AK017277
A_51_P314397	0.4036	1.27127	0.037607	0.905276	0.00469612	1.06e-07	0.783467	4.03e-06	2.41374	Crip2	NM_024223
A_52_P614417	0.427428	1.27046	-0.535276	0.307752	0.00946884	4.48e-07	0.000740948	0.0364142	2.41238	NA	XM_486264
A_52_P654437	0.0774768	1.26444	-1.31985	-0.132892	0.451134	3.18e-08	7.53e-08	0.116282	2.40233	NA	NAP061234-1
A_51_P266143	-0.0328826	1.26205	-0.497557	0.797374	0.81646	1.16e-08	4.03e-05	1.05e-06	2.39836	Adpgk	NM_028121
A_51_P460676	0.638957	1.25977	0.336163	0.95698	0.000220136	5e-07	0.0102986	3.72e-06	2.39458	Hspa4	NM_008300
A_51_P411345	0.0357319	1.25938	-0.304642	0.919008	0.802239	1.35e-08	0.00186174	3.52e-07	2.39393	Mogat2	NM_177448
A_51_P149714	0.922698	1.2589	-0.0822806	0.253926	0.000979611	1.77e-05	0.736296	0.263403	2.39314	Ms4a6d	NM_026835
A_51_P312497	0.631414	1.25826	-1.07823	-0.451379	7.96e-05	4e-08	3.44e-07	0.000491494	2.39207	Atp7a	NM_009726
A_52_P315631	0.236733	1.25504	-0.315419	0.702889	0.0455119	1.01e-07	0.00832852	4.27e-05	2.38674	Uchl4	NM_033607
A_51_P419711	0.568804	1.25472	-0.504995	0.180924	5.71e-05	1.25e-08	3.75e-05	0.0530894	2.38621	Tmsb10	NM_025284
A_51_P196844	0.824089	1.25468	-0.261378	0.169211	1.2e-06	3.01e-09	0.00146778	0.0326335	2.38614	Osbpl3	NM_027881
A_52_P17112	-0.264216	1.25453	-0.11173	1.40702	0.0316225	6e-08	0.298168	4.1e-08	2.3859	Znrf1	NM_133206
A_52_P562641	0.110501	1.25419	0.48154	1.62523	0.290335	3.06e-08	3.49e-05	2.82e-09	2.38533	Ier5l	NM_030244
A_51_P387608	1.49171	1.25294	0.208638	-0.030133	3.61e-07	8.52e-08	0.0204332	0.786443	2.38326	Hif1a	NM_010431
A_51_P496480	0.654911	1.24638	-0.902137	-0.310666	2.64e-05	6.55e-08	1.46e-06	0.00252552	2.37246	Rpl7	NM_011291
A_51_P120729	0.369554	1.2455	-0.789817	0.0861281	0.00246471	1.25e-07	7.3e-06	0.407136	2.37101	Polr2f	NM_027231
A_52_P184609	0.0246991	1.24549	0.75916	1.97995	0.952647	8.1e-05	0.00166433	1.71e-06	2.37099	Gabrp	NM_146017
A_51_P140237	0.0386142	1.24522	-0.523131	0.683478	0.740949	4.27e-09	9.37e-06	1.25e-06	2.37055	Fhl2	NM_010212
A_51_P108226	0.745925	1.24405	0.529796	1.02792	0.00547771	2.84e-05	0.0160698	0.000310392	2.36863	1100001G20Rik	NM_183249
A_52_P402663	-0.0457441	1.23935	0.841304	2.12639	0.814937	1.02e-06	3.23e-05	1.04e-08	2.36091	4930519N13Rik	AK019685
A_51_P126702	0.184373	1.23898	0.26918	1.32379	0.401943	7.13e-06	0.156773	1.84e-05	2.36031	Ddit4l	NM_030143
A_51_P416689	0.192357	1.23868	-0.636965	0.409361	0.161399	1.5e-07	5.97e-05	0.00287198	2.35983	Ext1	NM_010162
A_51_P108901	0.219744	1.23821	-0.819194	0.199271	0.0782171	8.77e-07	4.99e-05	0.112037	2.35905	Ccdc86	NM_023731
A_52_P384394	0.166996	1.2374	0.96264	2.03304	0.0672319	6.31e-09	1.33e-07	2.15e-10	2.35773	Bmf	NM_138313
A_51_P411926	-0.442451	1.23642	-0.703421	0.975449	0.0156526	1.63e-06	0.000242702	2.77e-05	2.35613	Bmp8b	NM_007559
A_52_P260914	0.209254	1.23555	0.668038	1.69434	0.129758	3.63e-07	0.000152541	1.13e-07	2.35471	Epb4.1l2	BC055044
A_51_P358152	0.242464	1.23512	-0.0566988	0.935956	0.0887135	2.41e-07	0.688154	5.58e-06	2.35401	Sepn1	NM_029100
A_52_P328044	0.224666	1.23284	0.0424025	1.05057	0.0249861	1.25e-08	0.663632	8.33e-08	2.35028	Tle1	NM_011599
A_51_P377489	0.26556	1.2327	0.165602	1.13274	0.00153536	1.16e-09	0.0113447	3.43e-09	2.35006	Ptplb	AF169286
A_51_P174854	0.446799	1.23211	0.221679	1.00699	0.000301002	5.34e-08	0.0180812	1.94e-07	2.34911	Maged1	NM_019791
A_52_P171715	0.511353	1.23054	-0.498847	0.220341	6.07e-05	6.68e-09	1.91e-05	0.0121234	2.34655	Ywhae	NM_009536
A_51_P174681	-0.00714713	1.22858	-0.0155753	1.22015	0.958978	1.68e-08	0.857467	1.16e-08	2.34336	Bzw2	NM_025840
A_52_P129756	1.0513	1.22689	-0.76826	-0.592661	3.59e-06	1.03e-07	8.62e-06	0.000109394	2.34063	Alas1	NM_020559
A_52_P1021832	-0.732195	1.22573	-0.0130012	1.94493	0.000453971	1.26e-06	0.947979	4.64e-08	2.33874	NA	AI627138
A_51_P109541	0.305838	1.22513	0.320373	1.23966	0.00581105	1.92e-08	0.00148802	3.01e-08	2.33776	E130308A19Rik	NM_001015681
A_51_P460844	0.0653318	1.22476	-0.453423	0.706003	0.694741	1.14e-07	0.000578726	2.78e-05	2.33716	Blvrb	NM_144923
A_52_P121812	0.767398	1.2247	0.41745	0.874752	0.000458883	8.17e-06	0.0207105	0.000167986	2.33707	Atp2c1	NM_175025
A_52_P430427	0.499069	1.22439	-0.429119	0.296205	0.0233896	1.42e-05	0.0381228	0.17486	2.33657	NA	NAP030221-1
A_52_P1016836	0.607653	1.22206	0.300892	0.915298	0.0212575	4.32e-05	0.175769	0.000969461	2.3328	Ttc6	XM_126988
A_51_P273921	-0.00636302	1.22158	-0.714833	0.513112	0.987031	2.06e-05	0.0017535	0.0221682	2.33202	Capg	NM_007599
A_52_P150212	0.368084	1.21917	-0.0936636	0.757427	0.00219168	2.63e-08	0.32524	3.09e-06	2.32813	Pkm2	NM_011099
A_52_P326502	-0.0209378	1.21738	0.271367	1.50969	0.959367	4.59e-05	0.227908	1.67e-05	2.32524	Sox21	NM_177753
A_51_P170758	-0.235466	1.21667	-1.0452	0.406932	0.0570957	8.7e-08	6.31e-07	0.00162724	2.32409	Grwd1	NM_153419
A_52_P310930	0.690062	1.21614	-0.637866	-0.111791	2.98e-05	3.75e-08	1.37e-05	0.294086	2.32324	Tomm20	NM_024214
A_52_P642005	-0.0675375	1.21573	1.09327	2.37654	0.739128	1.06e-06	9.47e-06	1.92e-08	2.32259	Camta1	XM_355539
A_51_P479733	0.112086	1.21499	-0.697948	0.40496	0.257334	9.49e-09	1.68e-06	0.000212829	2.3214	Smarca4	NM_011417
A_51_P488991	0.0126976	1.2139	-0.898579	0.302622	0.939421	2.4e-08	6.17e-07	0.00428769	2.31964	Oaf	NM_178644
A_52_P529360	0.0844477	1.2133	-0.360089	0.768761	0.415861	8.38e-09	0.000282865	7.56e-07	2.31867	Rab11fip5	NM_001003955
A_52_P432937	0.24055	1.20941	-1.37242	-0.403561	0.0176282	1.45e-08	2.59e-08	0.000320972	2.31243	NA	NAP000003-006
A_51_P185121	0.56161	1.20782	-0.375347	0.270863	6.5e-05	6.86e-08	0.000756143	0.00517907	2.30988	Sfrs6	AK004831
A_51_P295625	1.10923	1.20618	-0.569085	-0.472128	1.28e-06	1.33e-07	6.94e-05	0.000193251	2.30726	Arf4	NM_007479
A_51_P322994	0.399304	1.20564	-0.314447	0.491894	0.000515333	1.1e-08	0.000910346	4.55e-05	2.3064	Mrpl22	NM_175001
A_51_P403636	1.01384	1.20518	0.0212966	0.21264	1.73e-05	5.25e-07	0.898952	0.132037	2.30566	Smad7	NM_008543
A_52_P172704	-0.241253	1.20447	0.0129339	1.45866	0.277807	8.46e-06	0.958282	3.56e-06	2.30453	E030011O05Rik	AK086536
A_51_P212491	0.42263	1.20332	0.616246	1.39693	0.00113153	1.83e-07	5.12e-05	4.12e-08	2.30269	Pfkfb3	NM_133232
A_51_P334619	0.264256	1.20151	-0.0356073	0.901648	0.0575296	2.53e-07	0.805922	6.43e-06	2.2998	Zfp1	X16493
A_51_P214275	0.00817343	1.19981	-0.342492	0.84914	0.9678	6.86e-07	0.00880293	9.29e-06	2.29709	NA	AK132500
A_52_P313813	-0.169536	1.19845	-0.174531	1.19345	0.163661	7.4e-08	0.0857551	1.42e-07	2.29492	Nola2	NM_026631
A_52_P167630	-0.159795	1.19826	-0.484251	0.873808	0.251404	1.8e-07	0.000453347	5.78e-06	2.29463	Sh3kbp1	NM_021389
A_52_P472397	1.05406	1.19805	0.716364	0.860351	4.15e-07	7.99e-09	1.08e-06	2.37e-07	2.29429	Ctnnb1	AK020013
A_51_P379997	0.761317	1.19652	-0.174664	0.260539	3.16e-06	7.65e-09	0.0258565	0.00410967	2.29186	Galnt3	NM_015736
A_51_P242101	0.0377975	1.1964	0.255567	1.41417	0.831273	1.05e-07	0.0187269	4.62e-08	2.29167	5730528L13Rik	NM_028137
A_52_P147816	0.0932167	1.19482	-0.166085	0.935518	0.503062	7.86e-08	0.103535	1.26e-06	2.28916	Morc4	NM_029413
A_52_P484194	0.134691	1.19482	-0.145282	0.914845	0.561903	9.97e-06	0.36081	7.34e-05	2.28916	Il1rl1	NM_001025602
A_51_P469252	0.192359	1.19368	0.247494	1.24882	0.22951	1.17e-05	0.125763	3.59e-06	2.28736	Zfp647	NM_172817
A_52_P497503	0.258031	1.19324	-0.943681	-0.00847387	0.149547	8.93e-06	7.83e-05	0.968104	2.28666	NA	XM_621546
A_51_P473576	-0.274488	1.18996	-0.326718	1.13773	0.12877	2.34e-06	0.0335565	7.62e-06	2.28146	Apex1	NM_009687
A_51_P267783	-0.193466	1.18973	-0.32499	1.05821	0.0533343	1.79e-08	0.00103294	8.62e-08	2.2811	Il11	NM_008350
A_52_P1183904	1.03448	1.18951	0.34875	0.503782	0.000125129	7.05e-06	0.0448757	0.0104119	2.28075	Zfp273	NM_198322
A_51_P209280	0.687435	1.1888	0.342872	0.844233	1.52e-06	1.39e-09	6.35e-05	4.08e-08	2.27962	Rab31	NM_133685
A_51_P364146	0.793772	1.18784	-0.359647	0.0344167	5.32e-06	2.02e-08	0.000547434	0.753326	2.27811	Ldha	NM_010699
A_52_P644226	0.17192	1.18761	-1.20887	-0.193172	0.202391	3.58e-07	1.4e-06	0.146787	2.27776	Phtf1	NM_013629
A_51_P134413	0.529153	1.18449	-0.262894	0.39244	0.000250302	2.2e-07	0.0156321	0.00106522	2.27283	Arpp19	NM_021548
A_52_P477720	0.120913	1.18413	-0.908982	0.154236	0.328648	5.89e-08	1.03e-06	0.148363	2.27227	Cfl1	NM_007687
A_51_P182106	-0.23703	1.18287	-0.0453906	1.37451	0.486192	0.000165455	0.888421	0.000111161	2.27028	Unc5cl	NM_152823
A_51_P269792	0.106197	1.18158	-0.649244	0.426137	0.339817	2.34e-08	5.94e-06	0.00028317	2.26825	Rad51l1	NM_009014
A_51_P271074	0.463442	1.18097	0.150238	0.867765	0.101644	0.00011425	0.574987	0.0025966	2.26729	Sft2d1	NM_134114
A_52_P600824	0.447207	1.18047	-0.35714	0.376128	0.0267348	9.92e-06	0.0586807	0.0618957	2.26651	NA	NAP092588-001
A_52_P139093	0.644984	1.1799	-0.674613	-0.139694	5.39e-06	4.14e-09	8.02e-07	0.0679277	2.26561	Ube2a	NM_019668
A_51_P503896	-0.0591816	1.17841	0.392011	1.62961	0.710591	1.04e-07	0.00115328	1.18e-08	2.26328	Pycr1	NM_144795
A_51_P212741	-0.322972	1.17739	0.902831	2.4032	0.00533323	3.64e-08	6.88e-07	2.2e-10	2.26168	Scn2b	NM_001014761
A_51_P490070	0.450217	1.17622	-1.42365	-0.697645	0.0017833	1.47e-07	9.2e-08	2.83e-05	2.25984	Xlr3b	NM_011727
A_52_P298112	-0.108515	1.17581	-0.0558638	1.22846	0.687787	1.03e-05	0.798526	1.6e-05	2.2592	NA	AK077332
A_52_P489324	-0.039757	1.17519	-0.259977	0.954974	0.834171	5.73e-07	0.0318168	1.8e-05	2.25823	NA	XM_143511
A_51_P257743	0.189332	1.17517	-0.40471	0.581128	0.0753209	1.78e-07	0.00088501	4.16e-05	2.25819	2810451A06Rik	NM_176835
A_51_P134993	1.08286	1.17474	-0.168492	-0.076612	0.000365905	3.91e-05	0.453813	0.7751	2.25752	Clca6	NM_001033199
A_51_P418375	0.441983	1.17395	0.425716	1.15768	0.00493466	4.67e-07	0.00220645	1.1e-06	2.25629	Jam2	NM_023844
A_52_P542763	0.648279	1.17293	0.390477	0.915124	4.48e-05	4.73e-08	0.000582508	7.81e-07	2.25469	Bzw1	NM_025824
A_52_P649685	0.228311	1.17102	0.190997	1.1337	0.0912499	2.43e-07	0.0954775	6.49e-07	2.2517	Sfrs7	NM_146083
A_51_P271704	-0.329818	1.1696	0.39395	1.89337	0.00389225	3.04e-08	0.000364049	9.81e-10	2.2495	Cnn3	NM_028044
A_51_P401673	1.00466	1.16864	-0.269119	-0.105137	0.00583461	0.00146951	0.389027	0.751059	2.248	Fgd6	NM_053072
A_52_P488437	0.979367	1.16634	-0.433536	-0.246563	2.56e-05	4.87e-07	0.00127453	0.0700769	2.24442	Plek2	NM_013738
A_52_P306065	0.419156	1.16526	0.336309	1.08241	0.000125401	4.51e-09	0.000188387	1.34e-08	2.24273	Nuak1	AK020957
A_52_P32121	-0.252999	1.16472	-0.267611	1.15011	0.0272741	2e-06	0.0117596	2.82e-06	2.2419	Ckap4	NM_175451
A_51_P246345	-0.0430733	1.16431	-0.457667	0.749718	0.909504	4.51e-05	0.0319722	0.00294768	2.24126	Myl7	NM_022879
A_51_P162326	-0.122529	1.16393	0.289887	1.57635	0.301865	5.09e-08	0.00462397	6.83e-09	2.24067	LOC381508	BC056356
A_52_P321150	0.13335	1.16244	-0.214521	0.814568	0.430145	1.58e-06	0.069022	2.35e-05	2.23836	2310016C08Rik	NM_023516
A_52_P334188	0.140958	1.16145	-0.514529	0.505963	0.176653	2.54e-08	3.58e-05	6.48e-05	2.23682	Sfn	NM_018754
A_51_P272106	0.712082	1.16115	0.31704	0.766107	8.24e-06	1.66e-08	0.000963895	1.09e-06	2.23635	Cirbp	NM_007705
A_51_P180891	0.00313313	1.16071	0.823965	1.98155	0.990896	1.91e-06	4.94e-05	3.8e-08	2.23568	2810439F02Rik	NM_028341
A_51_P432199	0.1926	1.16049	0.262456	1.23035	0.13806	1.72e-07	0.0190686	2.07e-07	2.23534	Sap30	NM_021788
A_52_P52128	0.362261	1.16023	-0.258775	0.539188	0.0504661	3.88e-06	0.0995787	0.00374239	2.23492	NA	NM_001039522
A_51_P292127	0.365552	1.16019	0.617209	1.41185	0.00673856	7.11e-07	0.000141071	1.15e-07	2.23487	Pgm2l1	NM_027629
A_51_P311525	1.02721	1.15955	-0.50627	-0.373931	3.54e-06	1.32e-07	0.000189202	0.00302335	2.23387	Cltc	NM_001003908
A_51_P243914	0.818432	1.15919	0.90423	1.24498	3.42e-06	1.93e-08	3.54e-07	1.84e-08	2.23331	Skap2	NM_018773
A_52_P1196772	0.706353	1.1587	0.118716	0.571059	2.83e-05	6.56e-08	0.228553	5.91e-05	2.23256	Anxa2	AK087259
A_52_P597323	0.49205	1.158	-0.453533	0.212416	5.6e-05	7.11e-09	2.73e-05	0.0112223	2.23148	Ssh1	AK173144
A_52_P456279	0.653389	1.15664	0.340159	0.843413	0.000125317	1.79e-07	0.0041738	5.77e-06	2.22938	Cct8	NM_009840
A_51_P229105	0.657401	1.15555	0.489112	0.987261	0.0001152	1.71e-07	0.000307157	1.37e-06	2.22769	Cetn3	NM_007684
A_52_P349356	-0.249967	1.15416	0.239027	1.64316	0.00476386	4.78e-09	0.00223133	4.34e-10	2.22555	Ccdc92	NM_144819
A_51_P448109	0.75607	1.15325	0.092295	0.489476	0.000661204	1.71e-05	0.651023	0.00956667	2.22414	Capn2	NM_009794
A_52_P10254	0.242459	1.15282	-0.642148	0.268213	0.020765	2.85e-08	6.54e-06	0.00766902	2.22348	Psmc4	NM_011874
A_51_P268053	0.131014	1.15252	0.209493	1.231	0.200525	2.17e-08	0.0162104	2.19e-08	2.22302	Map4k4	NM_008696
A_51_P288138	0.0451142	1.15209	0.268656	1.37563	0.907726	6.23e-05	0.2243	3.23e-05	2.22235	Fpr-rs2	NM_008039
A_51_P470432	0.00883869	1.15128	0.485329	1.62777	0.973352	1.75e-06	0.00225024	1.8e-07	2.22111	Pdlim4	NM_019417
A_51_P507899	0.458969	1.15101	0.383867	1.07591	0.0103543	2.18e-06	0.0116903	8.65e-06	2.22069	Ttc8	NM_029553
A_52_P627793	0.579505	1.14985	-0.0142178	0.556132	1.2e-05	5.18e-09	0.87403	4.68e-06	2.21892	2410016F19Rik	NM_026113
A_51_P477833	0.572052	1.14957	-0.184577	0.392946	3.78e-05	1.7e-08	0.0260843	0.000310695	2.21848	NA	NM_001033352
A_52_P35960	0.623167	1.14905	-0.483616	0.0422635	2.44e-05	2.06e-08	4.38e-05	0.684036	2.21767	Ctsd	NM_009983
A_51_P144090	-0.437415	1.14794	0.500229	2.08558	0.000397175	2.46e-08	3.96e-05	3.4e-10	2.21597	Slc16a3	NM_030696
A_51_P177371	-0.0920826	1.14775	-0.0883587	1.15147	0.707335	4.39e-06	0.59161	1.87e-05	2.21567	Prnd	NM_023043
A_51_P421140	-0.436119	1.14634	0.433197	2.01566	0.000290469	7.6e-08	0.000204445	6.95e-10	2.21352	Tubb6	NM_026473
A_52_P139569	0.884746	1.14623	0.373569	0.635049	8.35e-06	1.12e-07	0.0014256	3.83e-05	2.21334	Mfap3l	AK017269
A_52_P508103	0.174539	1.1462	-1.01572	-0.0440649	0.331079	3.92e-06	6.76e-06	0.790872	2.2133	NA	XM_484004
A_52_P600750	0.00020035	1.14596	-0.3585	0.787256	0.998847	3.28e-08	0.000673688	1.65e-06	2.21293	NA	NAP056541-1
A_51_P435321	0.341946	1.14415	0.462454	1.26466	0.0290522	1.59e-05	0.00156894	4.57e-06	2.21016	Ap1s2	NM_026887
A_52_P391983	0.0254583	1.14335	0.0990941	1.21698	0.851567	1.59e-08	0.226141	1.6e-08	2.20893	Nt5c2	NM_029810
A_51_P228916	0.325707	1.14044	-0.525936	0.288797	0.00243332	9.33e-08	5.73e-05	0.00308612	2.20448	Pabpn1	NM_019402
A_52_P558859	0.460596	1.14014	0.0692297	0.748776	0.000128118	1.19e-08	0.397029	7.75e-07	2.20403	Rras2	NM_025846
A_51_P361099	0.22446	1.13849	-0.18996	0.724069	0.112424	4.08e-06	0.196304	0.000195264	2.2015	Adss	NM_007422
A_51_P187461	0.0353152	1.13763	-0.149713	0.952597	0.800397	2.58e-08	0.0786612	2.2e-07	2.20019	Rel	NM_009044
A_51_P477414	-0.299424	1.13734	0.207614	1.64438	0.00297557	2.65e-08	0.0186386	4.86e-09	2.19975	Echdc2	NM_026728
A_52_P68244	0.71396	1.13722	0.925815	1.34908	9.55e-05	1.07e-06	8.8e-06	2.13e-07	2.19957	NA	ENSMUST00000088681
A_51_P141610	0.412387	1.1368	-0.476172	0.248238	0.000110116	4.16e-09	9.32e-06	0.00238794	2.19892	Cables2	BC052789
A_52_P466741	0.181351	1.13445	-0.819202	0.133897	0.546891	0.00052643	0.00395176	0.607271	2.19535	Hax1	NM_011826
A_52_P431159	1.2212	1.13364	-0.183895	-0.271449	0.000119111	4.84e-05	0.313365	0.158534	2.19412	Il1rn	NM_031167
A_51_P119387	0.967433	1.13364	-0.610468	-0.444259	6.04e-06	1.78e-07	4.81e-05	0.000975917	2.19412	Tm4sf5	NM_029360
A_51_P444437	0.0191641	1.13207	0.132334	1.24523	0.865235	3.4e-09	0.0453691	2.33e-09	2.19172	Ltb4dh	NM_025968
A_51_P286373	0.519419	1.12978	-0.149875	0.460484	2.46e-05	5.69e-09	0.03382	2.29e-05	2.18825	Ttll12	NM_183017
A_51_P325904	-0.331833	1.12775	1.6068	3.06638	0.00971468	1.49e-07	3.83e-08	9.54e-11	2.18517	NA	NM_008381
A_52_P276222	0.324837	1.12704	-0.679488	0.122713	0.0110141	6.65e-07	3.94e-05	0.270796	2.1841	Polr2f	NM_027231
A_52_P482941	-0.116941	1.12622	0.706889	1.95006	0.408928	1.09e-06	6.1e-05	1.04e-08	2.18287	Dnajc2	NM_009584
A_52_P247603	0.0866112	1.1255	0.0285331	1.06743	0.302047	4.08e-09	0.719375	9.97e-09	2.18178	Pctk2	AK039890
A_52_P222888	0.695243	1.1236	-0.628711	-0.200351	3.88e-05	9.09e-07	8.84e-05	0.0392867	2.1789	Mylc2b	NM_023402
A_52_P532370	0.0892285	1.12283	-1.12816	-0.0945562	0.491901	7.71e-08	1.84e-07	0.387033	2.17773	NA	XM_884166
A_51_P120137	0.356602	1.12253	-0.285065	0.480858	0.00116069	1.89e-08	0.00180492	5.49e-05	2.17728	AW061290	NM_201361
A_52_P599238	1.13438	1.12247	-0.32787	-0.339777	3.6e-07	1.89e-08	0.000662619	0.00088369	2.1772	Rspry1	NM_026274
A_52_P43727	0.302949	1.12174	-0.00519824	0.813591	0.00176791	1.76e-08	0.961963	8.05e-07	2.17609	5031439G07Rik	AK030332
A_52_P474775	0.00999931	1.12097	-0.918347	0.192621	0.968906	1.53e-06	1.3e-05	0.198449	2.17493	Tspan32	NM_020286
A_52_P595429	0.551451	1.11994	-0.933401	-0.364911	0.000658201	3.72e-07	2.98e-06	0.00635513	2.17338	NA	NAP101150-1
A_51_P158210	-0.50282	1.11942	-0.338265	1.28397	3.7e-05	7.15e-09	0.000209715	3.61e-09	2.17259	Mcm2	NM_008564
A_51_P331246	-0.167872	1.11744	-0.392385	0.892929	0.442072	6.3e-05	0.033954	0.000919033	2.16962	Polr2l	AK011021
A_51_P155345	1.27694	1.11709	-0.321542	-0.481399	5.49e-07	9.64e-08	0.00288824	0.000260092	2.16909	Chmp2a	NM_026885
A_52_P124734	0.100688	1.11673	-0.260697	0.755345	0.723914	0.00012722	0.174945	0.000965959	2.16855	NA	XM_130253
A_52_P663149	0.201939	1.1167	0.039871	0.954632	0.0915867	1.36e-07	0.713416	1.89e-06	2.1685	Utp18	NM_001013375
A_52_P1687	0.379334	1.11418	-0.81863	-0.0837798	0.01734	1.25e-06	2.57e-05	0.599884	2.16473	EG277333	NM_199472
A_52_P459211	-0.0467975	1.11307	0.0433234	1.20319	0.817079	1.29e-06	0.794232	2.86e-06	2.16305	A930038B10Rik	AK044736
A_51_P242043	0.320301	1.11235	-0.432302	0.35975	0.0059335	6.5e-08	0.000237877	0.00161195	2.16198	Dhcr24	NM_053272
A_51_P128987	-0.249603	1.11168	-0.946884	0.414403	0.0668284	1.91e-06	1.08e-05	0.00310602	2.16098	Akr1b8	NM_008012
A_51_P259214	0.369393	1.11145	0.837592	1.57965	0.00082666	8.42e-08	1.15e-06	8.86e-09	2.16062	Slc39a6	NM_139143
A_51_P439876	0.0426493	1.11068	0.60126	1.66929	0.814557	5.6e-07	0.000227058	8.4e-08	2.15947	9430080K19Rik	AK020498
A_52_P49727	0.20319	1.1105	0.00426466	0.911573	0.0807257	1.09e-07	0.976131	1.19e-06	2.1592	Psmd1	NM_027357
A_51_P485946	0.369393	1.10989	-0.567184	0.173314	0.00193004	5.06e-08	2.24e-05	0.0772959	2.15829	Fdft1	NM_010191
A_52_P308542	-0.0822962	1.10803	-0.300022	0.890303	0.589758	4.83e-07	0.0169628	1.19e-05	2.15551	Ywhaq	NM_011739
A_52_P249699	0.291044	1.10786	-0.162348	0.654466	0.00133493	4.9e-09	0.0187693	7.55e-07	2.15525	Ptges3	NM_019766
A_52_P411296	-0.204585	1.1069	-0.48489	0.826595	0.164341	6.51e-07	0.000531667	2.96e-05	2.15382	Sh3kbp1	NM_021389
A_51_P209996	0.131759	1.10568	-0.485784	0.488138	0.194513	2.88e-08	4.34e-05	6.68e-05	2.152	Tuba-rs1	M19413
A_51_P456114	0.165611	1.10388	0.322867	1.26113	0.113031	4.42e-08	0.00140679	2.6e-08	2.14932	9930013L23Rik	AK018112
A_51_P110329	0.165594	1.10305	-0.671578	0.265876	0.0871255	2.45e-08	2.72e-06	0.00543725	2.14808	Vsig1	NM_030181
A_52_P57308	0.952821	1.10278	0.0532429	0.203203	2.4e-05	1.16e-06	0.737945	0.155969	2.14768	Cand1	XM_125901
A_52_P598278	0.227758	1.10161	-0.904295	-0.030443	0.00724823	5.71e-09	8.6e-08	0.722371	2.14594	Tubb2c	NM_146116
A_52_P514094	0.369169	1.10149	-0.297752	0.434572	0.00118222	2.93e-08	0.00172894	0.000172011	2.14577	Atp6v1f	NM_025381
A_52_P223814	0.984714	1.10088	-0.213041	-0.0968787	8.02e-05	6.04e-06	0.201216	0.618452	2.14485	NA	NAP026710-1
A_52_P589169	0.170199	1.1006	0.782732	1.71313	0.119375	3.49e-07	8.47e-06	7.74e-09	2.14443	2010111I01Rik	XM_892590
A_52_P279368	0.33207	1.10009	2.51674	3.28476	0.0669694	5.1e-06	2.59e-08	9.34e-10	2.14368	Sox17	NM_011441
A_52_P222350	0.970337	1.09999	-0.785724	-0.656073	2.34e-05	1.17e-06	3e-05	0.000206787	2.14353	NA	XM_127565
A_51_P177242	0.42739	1.09998	-0.245731	0.42686	0.000627827	4.88e-08	0.00875446	0.000319756	2.14352	NA	AK122422
A_51_P340027	0.635172	1.09825	-0.487152	-0.0240709	9.58e-05	1.15e-07	9.67e-05	0.850499	2.14095	Pappa	NM_021362
A_52_P558188	1.34102	1.09816	-1.06486	-1.30772	9.02e-08	1.56e-08	6.37e-08	5.89e-09	2.14081	Gabarap	NM_019749
A_51_P345046	0.282765	1.09585	0.0578207	0.870902	0.00329116	1.25e-08	0.474064	1.53e-07	2.13739	Metap2	NM_019648
A_51_P439803	1.27021	1.09521	-0.725255	-0.900254	0.00136681	0.000687072	0.0121279	0.00713829	2.13644	NA	NM_013798
A_52_P81677	0.3691	1.09422	-0.52011	0.205014	0.000561211	1.4e-08	1.11e-05	0.0157328	2.13498	NA	XM_893533
A_52_P210893	0.186624	1.0941	-1.26054	-0.353056	0.150171	2.72e-07	2.04e-07	0.00531155	2.1348	Litaf	NM_019980
A_51_P169087	-0.435517	1.0941	0.349534	1.87915	0.000835295	8.48e-08	0.00127449	1.56e-09	2.1348	NA	NM_001033264
A_52_P586865	0.10904	1.09368	-0.109516	0.875123	0.698494	2.51e-05	0.599933	0.000357779	2.13418	Afap1l1	NM_178928
A_52_P227065	0.392156	1.09223	-0.508553	0.191517	0.00106252	4.64e-08	4.29e-05	0.0462355	2.13203	Bud31	AV132191
A_52_P522157	-0.301951	1.0915	0.424126	1.81758	0.00261987	1.64e-08	6.42e-05	4.24e-10	2.13095	2810026P18Rik	BC032970
A_51_P251357	-0.442041	1.09004	0.137121	1.66921	0.000397233	4.13e-08	0.112833	2.02e-09	2.12881	Ctps	NM_016748
A_52_P172145	0.241022	1.08982	-0.30567	0.543126	0.00809855	1.16e-08	0.000558252	8.53e-06	2.12847	Cog8	NM_139229
A_51_P393862	0.381771	1.08888	-0.576642	0.130466	0.000710873	2.4e-08	8.26e-06	0.139034	2.12709	Spryd4	NM_025716
A_51_P443344	-0.458959	1.08886	0.113851	1.66167	0.00968957	1.19e-05	0.510005	3.2e-07	2.12706	Acyp2	NM_029344
A_51_P435911	-0.158949	1.08801	-0.399008	0.847956	0.445537	6.59e-06	0.014133	0.000122323	2.12581	Hsd3b7	NM_133943
A_52_P261846	0.374428	1.08764	-0.295163	0.418054	0.0421016	6.28e-06	0.0589353	0.0167889	2.12527	Col18a1	NM_009929
A_51_P432641	0.0499215	1.08711	-0.139719	0.897472	0.880865	3.64e-05	0.506376	0.000395308	2.12448	Cxcl10	NM_021274
A_52_P547202	-0.671174	1.08711	-0.777792	0.980492	6.84e-06	1.43e-08	4.91e-07	5.81e-08	2.12448	NA	NM_152822
A_51_P259975	0.489801	1.087	1.72756	2.32475	0.0133228	9.1e-06	4.09e-07	2.61e-08	2.12431	Aspa	NM_023113
A_51_P192800	1.16854	1.08696	0.262317	0.180739	1.59e-06	2.5e-07	0.0170142	0.120292	2.12426	Grn	NM_008175
A_51_P408059	-0.118023	1.08657	-0.350786	0.853811	0.351735	1.34e-07	0.00176471	2.19e-06	2.12369	Nutf2	NM_026532
A_52_P277592	0.183397	1.08548	-0.958105	-0.0560185	0.521122	0.00010978	0.000161689	0.822078	2.12209	Rps2	NM_008503
A_51_P126484	-0.16007	1.08452	0.166658	1.41125	0.113251	3.89e-08	0.0517843	7.34e-09	2.12067	Myo1b	NM_010863
A_51_P215922	0.000661162	1.08414	0.271442	1.35492	0.996193	2.82e-08	0.00280146	7.47e-09	2.12011	Casp6	NM_009811
A_51_P460153	0.941431	1.08386	0.496894	0.63932	2.4e-05	1.21e-06	0.00141543	0.000340562	2.1197	Xrn2	AK031247
A_52_P339791	0.062731	1.08373	-0.876726	0.144275	0.701902	2.7e-07	2.78e-06	0.223698	2.11951	Hdgf	NM_008231
A_52_P202044	0.0430424	1.08061	0.8564	1.89397	0.92376	0.000283893	0.00197093	5.92e-06	2.11493	9330162012Rik	AK034200
A_52_P224760	0.341133	1.08041	0.35408	1.09335	0.0146802	5.02e-07	0.00459823	9.48e-07	2.11463	Ptgs2	NM_011198
A_51_P322640	0.228994	1.0801	-0.130087	0.72102	0.117892	9.09e-07	0.310571	6.49e-05	2.11418	Ccl24	NM_019577
A_51_P298178	0.30463	1.07988	-0.676149	0.0990997	0.0978997	0.000117475	0.00330357	0.606708	2.11386	Dctn3	NM_016890
A_51_P110651	0.304921	1.07975	-0.635915	0.138916	0.00602428	5.56e-08	7.88e-06	0.151027	2.11367	Zfp13	NM_011747
A_52_P244723	0.504904	1.07862	0.64999	1.22371	1.6e-05	3.87e-09	5.24e-07	2.1e-09	2.11202	Tbcel	NM_173038
A_52_P423424	0.503126	1.07744	-0.180857	0.39346	3.82e-05	1.71e-08	0.0209885	0.000196075	2.11029	Ero1l	NM_015774
A_51_P451338	-0.101483	1.07733	-0.433762	0.745051	0.489592	1.58e-06	0.00198933	2.61e-05	2.11013	Jag2	NM_010588
A_52_P372032	0.167528	1.07695	0.193465	1.10289	0.45238	2.07e-05	0.320709	7.63e-05	2.10957	Ddx21	NM_019553
A_52_P682007	0.0206637	1.07677	0.933929	1.99004	0.90359	1.09e-07	7.16e-07	1.12e-09	2.10931	Ube2e2	AK044807
A_51_P235291	0.0735647	1.07663	-0.843798	0.159265	0.610676	1.6e-07	2.23e-06	0.146387	2.1091	Ddx18	NM_025860
A_52_P407755	0.655599	1.07428	1.2949	1.71357	0.00707942	0.000429851	0.000189202	1.43e-05	2.10567	Prei4	AK009137
A_52_P148678	0.394809	1.07389	0.167924	0.847004	0.000121744	5.19e-09	0.0137655	6.29e-08	2.1051	NA	AK169695
A_51_P399545	0.455189	1.07386	-0.371483	0.247193	0.000237853	2.27e-07	0.00112256	0.0105503	2.10506	Arid2	NM_175251
A_51_P355122	-0.236626	1.07275	0.0133496	1.32273	0.227647	9.07e-06	0.951862	3.24e-06	2.10344	Tnni2	NM_009405
A_51_P172085	-0.108731	1.06961	-0.100609	1.07773	0.465466	4.29e-06	0.497366	6.76e-06	2.09887	Arhgdig	NM_008113
A_52_P129456	0.298387	1.06886	-0.0699924	0.700478	0.00579384	4.73e-08	0.448818	3.63e-06	2.09777	Steap2	AK086787
A_51_P353173	-0.0234311	1.06819	-1.28666	-0.195036	0.84058	2.23e-08	4.59e-08	0.022905	2.0968	2810405J04Rik	NM_133747
A_51_P253904	-0.452355	1.06809	-0.266504	1.25394	0.0023089	1.69e-06	0.00738719	2.09e-07	2.09665	Nme1	NM_008704
A_52_P648424	0.382117	1.06797	-0.119206	0.56665	0.000964782	4e-08	0.160343	1.93e-05	2.09649	Nedd4	NM_010890
A_52_P444162	0.963266	1.06643	0.0405552	0.143722	3.37e-07	7e-09	0.594845	0.0519624	2.09425	Rab11a	NM_017382
A_52_P271910	0.143533	1.06635	-0.31395	0.608863	0.318725	5.06e-07	0.00894367	0.000134722	2.09412	Pip5k1c	AK122319
A_52_P550843	0.519139	1.06529	0.691106	1.23726	0.000363712	1.73e-07	1.09e-05	9.27e-08	2.09259	5830417C01Rik	NM_024282
A_51_P116601	0.0622564	1.06524	0.206557	1.20954	0.66929	7.64e-07	0.0616527	2.17e-07	2.09252	A330021E22Rik	NM_172447
A_51_P314107	-0.435588	1.06503	0.244779	1.7454	0.0977904	0.000139968	0.290722	2.63e-05	2.09222	Gsdm1	NM_021347
A_52_P139478	0.367605	1.06476	-0.126277	0.570879	0.00131068	4.26e-08	0.137439	1.89e-05	2.09182	1190005P17Rik	NM_025431
A_52_P443705	0.120578	1.06426	-0.454621	0.489058	0.393631	3.39e-07	0.000531667	0.000527897	2.09109	Isg20l1	NM_026531
A_52_P151362	0.62247	1.06421	0.369648	0.811388	1.13e-05	1.61e-08	0.000153051	2.93e-07	2.09102	Mboat2	NM_026037
A_51_P300726	0.0538437	1.06313	-0.708434	0.30085	0.833618	1.09e-05	0.000573042	0.100963	2.08946	Oprs1	NM_011014
A_51_P500813	0.49648	1.06293	-0.637706	-0.0712514	0.000493369	1.03e-06	0.000115286	0.54755	2.08918	Lgals9	NM_010708
A_51_P162773	-0.489454	1.062	-0.260721	1.29073	0.00226564	9.52e-07	0.0346572	3.61e-07	2.08783	Sccpdh	NM_178653
A_51_P464791	0.762477	1.06052	1.18452	1.48257	2.82e-05	2.55e-07	2.44e-07	2.72e-08	2.08569	Prei4	NM_028802
A_51_P237766	0.416293	1.06049	-1.16829	-0.524101	0.0166071	1.5e-05	1.09e-05	0.00265835	2.08563	Nsfl1c	NM_198326
A_52_P112017	0.283745	1.06025	-0.565323	0.211183	0.0535097	2.46e-06	0.000190353	0.0872519	2.0853	Tspo	NM_009775
A_51_P266717	0.349663	1.05959	-0.801515	-0.0915925	0.0101293	4.19e-07	7.34e-06	0.479388	2.08433	NA	AK009957
A_51_P147942	0.17386	1.05941	-0.0933839	0.792165	0.520201	0.000195653	0.720383	0.00152876	2.08408	Igf1	NM_010512
A_51_P391542	0.802906	1.0569	-0.0889505	0.16504	0.000307057	7.61e-06	0.629182	0.359061	2.08045	Psma3	NM_011184
A_51_P193254	0.0964974	1.05667	0.365685	1.32586	0.247312	7.54e-09	7.64e-05	1.86e-09	2.08012	Snrpd1	NM_009226
A_51_P428913	0.328186	1.05449	-0.517751	0.208548	0.053281	2.37e-05	0.00469412	0.209184	2.07698	Pkm2	D38379
A_51_P225832	0.302392	1.05283	0.188707	0.939148	0.00777828	8.88e-08	0.0253945	8.28e-07	2.0746	2700097O09Rik	NM_028314
A_51_P252988	0.4165	1.05147	0.409646	1.04461	0.121281	0.000940908	0.171222	0.00263376	2.07264	Isx	AK018615
A_51_P228295	0.0555852	1.05132	0.013626	1.00936	0.728546	2.47e-07	0.920837	7.12e-07	2.07243	Mpzl1	NM_001001880
A_51_P314019	0.061276	1.05114	-0.579845	0.41002	0.484733	5.53e-09	1.38e-06	3.25e-05	2.07217	Banf1	NM_011793
A_51_P440743	-0.320064	1.0511	-0.556581	0.814583	0.0409735	3.61e-06	0.00134785	0.000119679	2.07211	Celsr1	NM_009886
A_52_P76196	0.172594	1.05083	-0.892341	-0.0141098	0.0499941	1.72e-08	1.71e-07	0.889289	2.07171	NA	XM_902301
A_51_P325914	0.665583	1.04996	0.13299	0.517363	8.71e-06	1.03e-07	0.100052	2.98e-05	2.07047	Jun	NM_010591
A_51_P384469	0.352093	1.04906	0.47019	1.16716	0.019147	2.58e-06	0.000686332	8.75e-07	2.06918	Syncrip	NM_019666
A_52_P685666	0.032699	1.04874	-0.332274	0.683763	0.812416	4.13e-08	0.000750665	3.3e-06	2.06872	Cct3	NM_009836
A_51_P101317	0.2128	1.04848	-0.311819	0.523858	0.0338975	4.88e-08	0.00134883	3.97e-05	2.06835	Prmt3	NM_133740
A_52_P189970	0.252413	1.04842	0.923481	1.71949	0.0302111	1.66e-07	9.5e-07	4.45e-09	2.06826	Stc1	BC021425
A_51_P110689	-0.230599	1.04759	0.489771	1.76796	0.0356037	1.06e-07	8.97e-05	2.21e-09	2.06708	Rrm2	NM_009104
A_51_P195153	-0.656868	1.04733	-0.162883	1.54132	0.00275726	5.26e-05	0.401993	2.04e-06	2.06671	Gtse1	NM_013882
A_51_P437478	0.297401	1.04709	0.0793111	0.828997	0.0130524	3.27e-07	0.501078	9.06e-06	2.06635	Zfp566	NM_152814
A_51_P365744	0.931388	1.04638	-0.584308	-0.469316	1.03e-05	4.68e-07	9.08e-05	0.00084391	2.06534	Duoxa2	NM_025777
A_52_P1172972	0.42365	1.04612	0.0568911	0.679365	0.00505939	9.04e-07	0.684149	8.1e-05	2.06498	Hspd1	NM_010477
A_51_P156222	0.168379	1.04483	-1.29234	-0.415885	0.757583	0.00389608	0.00112672	0.275765	2.06313	A930017N06Rik	NM_175522
A_52_P176391	0.0722042	1.04449	0.448249	1.42053	0.641633	1.73e-06	0.00140576	1.14e-07	2.06264	Hspa2	NM_008301
A_52_P462883	0.187197	1.04442	-1.19548	-0.338262	0.236332	1.77e-06	1.06e-06	0.0189961	2.06253	NA	NAP052987-1
A_52_P358753	0.997219	1.04404	-0.166851	-0.120028	1.73e-06	1.12e-07	0.0770357	0.238174	2.062	2410129H14Rik	NM_175245
A_51_P133037	-0.425128	1.0429	-0.332609	1.13541	0.0339532	1.79e-05	0.0504224	1.97e-05	2.06036	Ppp1r14b	NM_008889
A_52_P30632	-0.0449088	1.04235	-0.971195	0.116065	0.760229	5.84e-07	1.83e-06	0.260398	2.05958	1700007K13Rik	BC048581
A_51_P168123	0.172557	1.03941	-0.476868	0.389985	0.0424746	1.42e-08	1.5e-05	0.000120572	2.05539	Lars	BC006060
A_51_P482633	0.346436	1.03865	-0.6415	0.0507101	0.0025253	3.17e-07	2.19e-05	0.624436	2.0543	Rps6ka4	NM_019924
A_52_P157880	-0.0806942	1.03855	-0.311342	0.807898	0.493741	6.59e-08	0.00161418	1.11e-06	2.05416	NA	XM_357943
A_51_P447714	0.13464	1.03765	0.213992	1.117	0.343169	5.2e-07	0.0388739	1.18e-06	2.05288	Rbmxrt	NM_009033
A_52_P308875	-0.388963	1.03745	0.050509	1.47692	0.00146598	9.92e-08	0.627022	8.72e-09	2.0526	Apobec3	AK049998
A_51_P345340	0.862529	1.03698	-0.678872	-0.504421	1.64e-05	4.53e-07	2.51e-05	0.000437338	2.05193	2310043J07Rik	AK009780
A_52_P604526	0.576091	1.03586	-0.317705	0.142062	0.000225272	4.42e-07	0.00800162	0.238721	2.05033	Mrpl19	NM_026490
A_51_P175354	0.175287	1.03558	0.399439	1.25973	0.0655429	3.63e-08	0.000150729	1.23e-08	2.04994	8430406M14Rik	AK033366
A_52_P1013551	0.451893	1.03413	-0.197237	0.385005	0.000353367	6.86e-08	0.025692	0.000597165	2.04789	Nsdhl	NM_010941
A_51_P492765	0.338925	1.03406	0.235587	0.930724	0.00590667	1.86e-07	0.0192439	9.37e-07	2.04778	Wdr75	NM_028599
A_51_P390775	0.345536	1.03192	0.77017	1.45655	0.00398232	2.45e-07	9.48e-06	5.71e-08	2.04474	Ube2e1	NM_009455
A_51_P222657	0.306009	1.0315	-0.509134	0.216357	0.0525698	2.72e-06	0.00107862	0.139067	2.04415	Tspo	NM_009775
A_52_P150903	0.592055	1.03096	-0.49092	-0.0520162	0.00106208	2.46e-06	0.00128685	0.75742	2.04338	Tubb6	AK041002
A_52_P410334	0.313873	1.03092	-0.491525	0.225523	0.0105923	2.29e-07	0.000159047	0.0402205	2.04333	NA	TC1514546
A_52_P1100511	-0.144181	1.03036	-0.330929	0.843615	0.53626	7.47e-05	0.0818346	0.000318423	2.04254	NA	AK082307
A_51_P506674	0.038306	1.03005	-0.306692	0.685056	0.798502	2.89e-07	0.00170162	6.27e-06	2.0421	Rpp38	NM_001013376
A_52_P245577	0.470493	1.02779	-1.18584	-0.628544	0.00125281	4.31e-07	3.08e-07	6.48e-05	2.0389	NA	TC1503683
A_52_P164017	0.129252	1.02702	-0.729947	0.167816	0.39198	4.01e-06	8.2e-05	0.188874	2.0378	Scamp4	NM_019575
A_51_P236846	0.492543	1.02652	-0.6973	-0.163327	0.000745001	3.43e-07	1.45e-05	0.154115	2.0371	F3	NM_010171
A_51_P518051	0.0164966	1.02467	-0.0724073	0.935763	0.914192	6.12e-08	0.424094	2.5e-07	2.03449	Dusp4	NM_176933
A_51_P381015	0.152532	1.02436	0.369992	1.24182	0.407423	4.36e-06	0.0117188	1.79e-06	2.03406	Evx1	NM_007966
A_51_P336691	0.225631	1.02422	-0.317251	0.481334	0.0168367	1.56e-07	0.00163661	5.56e-05	2.03385	Sfrs9	NM_025573
A_51_P444874	0.482785	1.02421	0.68	1.22143	0.000358249	1.29e-07	6.76e-06	5.32e-08	2.03385	Nlk	NM_008702
A_51_P504992	-0.0252435	1.02384	-0.234697	0.814386	0.853385	5.73e-07	0.0245857	5.09e-06	2.03332	Ywhaq	NM_011739
A_51_P269687	-0.0603553	1.02382	-0.292077	0.792094	0.670473	1.53e-07	0.00453982	2.91e-06	2.03329	Pole2	NM_011133
A_51_P396284	0.244618	1.02364	-0.382673	0.396352	0.0672393	1.48e-05	0.00224137	0.00244669	2.03304	Chd3	BC030435
A_52_P177293	0.488442	1.02357	0.0483104	0.583438	0.0029289	1.79e-06	0.751608	0.000445553	2.03294	Snx24	NM_029394
A_52_P126417	-0.120964	1.02284	-0.0233589	1.12044	0.203436	7.82e-08	0.829227	1.36e-07	2.03191	Zdhhc15	NM_175358
A_52_P337297	-0.193624	1.02274	-0.215546	1.00082	0.027455	1.94e-08	0.00631683	4.12e-08	2.03178	Amd2	NM_007444
A_52_P516059	0.146329	1.02273	0.425831	1.30224	0.113525	3e-08	6.93e-05	6.83e-09	2.03176	Tia1	NM_011585
A_51_P147987	-0.568086	1.02264	-0.885759	0.704962	0.057453	0.000556896	0.00194751	0.0137722	2.03163	Itlna	NM_010584
A_52_P469249	0.250862	1.02149	-0.549576	0.221048	0.0216855	1.13e-07	3.18e-05	0.0284381	2.03001	NA	ENSMUST00000073513
A_51_P332822	0.127921	1.02113	-0.380013	0.5132	0.16417	3.62e-07	0.00108431	9.82e-05	2.02951	Abce1	NM_015751
A_52_P585104	0.154317	1.02093	-0.511748	0.354863	0.130753	6.96e-08	3.46e-05	0.00101544	2.02922	Fkbp4	NM_010219
A_51_P142465	-0.740813	1.01955	-0.583019	1.17735	1.59e-05	1.4e-07	2.41e-05	7.67e-08	2.02729	Ranbp1	NM_011239
A_51_P225224	0.172062	1.01953	0.194683	1.04215	0.420547	6.02e-05	0.30125	4.57e-05	2.02726	Htra1	NM_019564
A_52_P20966	-0.136767	1.0191	0.227589	1.38346	0.33493	6.13e-06	0.0512173	2.6e-07	2.02665	Hnrpab	NM_010448
A_51_P347862	-0.398085	1.01807	-0.82921	0.58695	0.0200631	5.15e-06	4.18e-05	0.00104397	2.02521	Actn1	NM_134156
A_52_P292853	0.108483	1.01802	0.253507	1.16305	0.435865	3.79e-07	0.0189043	2.44e-07	2.02514	AB112350	NM_178728
A_51_P191021	0.330608	1.01801	0.279771	0.967175	0.00414219	1.09e-07	0.00437751	3.27e-07	2.02513	Hrb	NM_010472
A_52_P401824	0.71776	1.01727	0.244679	0.544187	2.73e-05	2.74e-07	0.0214083	0.000170786	2.02408	Tsg101	NM_021884
A_52_P344036	-0.00401383	1.017	0.0394786	1.0605	0.980637	9.68e-08	0.70705	1.27e-07	2.02371	Adamts7	BC076575
A_52_P1173999	-0.0112222	1.01626	-0.643472	0.384006	0.95587	5.17e-07	3.71e-05	0.00312306	2.02266	Vcp	XM_920373
A_51_P219074	0.498014	1.01605	-0.0808898	0.437149	0.000144711	2.46e-07	0.396433	0.000171082	2.02238	Id2	NM_010496
A_52_P173945	0.0424679	1.01546	0.117692	1.09068	0.811141	9.99e-07	0.351427	2.33e-06	2.02154	BC048546	NM_001001179
A_51_P447595	-0.371287	1.01431	0.576422	1.96202	0.00623954	5.08e-07	8.53e-05	3.44e-09	2.01993	Scube1	AK078630
A_51_P164270	0.098179	1.01311	-0.346353	0.568583	0.416117	1.29e-07	0.00114885	3.97e-05	2.01826	Snrpa1	NM_021336
A_52_P496956	-0.041831	1.01262	-0.428335	0.626117	0.800023	2.74e-07	0.000469221	3.74e-05	2.01757	Acsbg1	NM_053178
A_52_P192106	0.507711	1.01256	-0.727329	-0.222478	7.53e-05	1.42e-07	3.2e-06	0.0103456	2.01749	NA	XM_889285
A_51_P275101	0.18314	1.01095	-0.136684	0.691122	0.0579752	5.77e-07	0.170951	1.62e-05	2.01523	Chst11	NM_021439
A_51_P436817	-0.0842541	1.01082	-0.192537	0.902539	0.630588	6.26e-06	0.158616	1.34e-05	2.01506	Dos	NM_015761
A_52_P400584	-0.250555	1.01078	0.249461	1.51079	0.02461	1.49e-07	0.0107633	8.93e-09	2.01499	5730528L13Rik	NM_028137
A_51_P504546	0.526714	1.0105	-0.663562	-0.179772	8.18e-05	5.71e-08	3.32e-06	0.0481433	2.01462	Aldh1l1	NM_027406
A_51_P280245	0.538713	1.01015	-0.51557	-0.0441281	2.87e-05	8.07e-08	2.38e-05	0.596703	2.01413	Zfp207	NM_011751
A_52_P50107	-0.103658	1.00985	-0.158718	0.954789	0.38026	1.24e-07	0.082004	3.96e-07	2.0137	Set	NM_023871
A_52_P654946	-0.0150046	1.00984	-0.914814	0.110027	0.927586	1.04e-07	5.13e-07	0.268437	2.01368	NA	AK019820
A_51_P410681	0.0631176	1.00968	2.8803	3.82687	0.873266	0.000389546	5.53e-07	4.12e-08	2.01347	Irx5	NM_018826
A_51_P256003	0.730703	1.00955	1.0302	1.30905	7.38e-06	2.16e-07	7.1e-07	4.58e-08	2.01329	Zfand5	NM_009551
A_51_P373609	0.145866	1.00818	-0.133588	0.728724	0.123281	4.09e-08	0.0941764	1.31e-06	2.01137	Yars2	NM_198246
A_52_P180972	0.116015	1.00757	-0.469507	0.422046	0.484382	1.54e-06	0.00102064	0.00366064	2.01052	NA	NAP029125-1
A_51_P396003	0.372735	1.00735	-0.830072	-0.195452	0.0101519	1.86e-06	3.09e-05	0.159596	2.01022	Dgat2	NM_026384
A_52_P1082736	-0.379351	1.00699	0.329082	1.71542	0.0105647	1.39e-06	0.00966182	2.77e-08	2.00972	Zfp553	AK011173
A_52_P225377	0.076672	1.00694	-0.0471469	0.883122	0.614492	4.35e-07	0.705168	2.85e-06	2.00965	Pvr	AK014446
A_51_P343377	0.837748	1.00605	-0.634403	-0.466102	0.000234786	9.93e-06	0.000548542	0.00774916	2.0084	Daf2	NM_007827
A_51_P148037	0.218065	1.00537	-0.0561459	0.731159	0.0458799	2.97e-07	0.629964	1.62e-05	2.00746	Sh3pxd2b	NM_177364
A_52_P670745	0.279022	1.00438	-0.282889	0.442464	0.0074816	6.6e-08	0.00246677	0.000150709	2.00607	Glo1	NM_025374
A_52_P287338	0.574506	1.00437	0.204655	0.634523	0.00028067	4.96e-07	0.0564751	5.7e-05	2.00607	Eif4e3	NM_025829
A_51_P401797	-0.0330372	1.00427	0.168143	1.20545	0.884732	2.83e-06	0.206409	1.23e-06	2.00593	Mmp9	NM_013599
A_52_P424585	0.794437	1.00391	0.694394	0.903866	0.000116352	6.01e-06	0.000175038	3.36e-05	2.00543	Ctnnb1	NM_007614
A_52_P110002	0.168148	1.0034	-0.183997	0.651259	0.0590524	2.75e-08	0.0180198	2.21e-06	2.00473	2010309E21Rik	NM_025591
A_51_P409694	-0.480086	1.00257	-0.888521	0.594139	0.000269113	1.07e-07	6.13e-07	2.03e-05	2.00357	Psrc1	NM_019976
A_51_P277431	0.0958883	1.00252	-0.48995	0.416687	0.653555	1.36e-05	0.00158781	0.0073133	2.0035	Ccdc3	NM_028804
A_52_P732529	0.496985	1.00084	0.730785	1.23464	0.0281669	6.75e-05	0.00100876	2.64e-05	2.00116	Taf9	NM_027139
A_51_P121635	0.129958	1.00025	0.0695411	0.939829	0.267853	9.64e-07	0.552412	1.28e-06	2.00034	Maged2	NM_030700
A_51_P466829	-0.337978	-1.00036	0.147607	-0.514772	0.00114719	1.39e-07	0.0758346	2.31e-05	0.499876	A230106M15Rik	NM_175474
A_52_P341400	-0.823663	-1.00079	0.119557	-0.0575724	0.000160085	5.84e-06	0.432315	0.749295	0.499726	4930429A22Rik	NM_153530
A_52_P52357	-0.132883	-1.00137	-0.104878	-0.973363	0.551123	5.15e-05	0.563649	0.000111553	0.499526	Tor3a	BC052851
A_51_P112627	-0.839699	-1.00232	0.40493	0.242305	1.76e-05	5.18e-07	0.00114513	0.0399601	0.499195	St6galnac2	NM_009180
A_51_P311459	-0.787765	-1.0039	0.402116	0.185984	0.000434707	3.53e-05	0.0205623	0.263707	0.498651	NA	XM_147444
A_52_P393488	-0.350114	-1.00409	-0.0655069	-0.71948	0.0121093	3.67e-06	0.650188	4.57e-05	0.498585	Ms4a4c	NM_029499
A_51_P505761	0.106468	-1.00428	-0.197185	-1.30794	0.224545	1.81e-08	0.00913584	3.27e-09	0.498518	1300010F03Rik	AK129164
A_51_P504073	-0.41729	-1.00606	0.324689	-0.264076	9.45e-05	1.06e-08	0.000178335	0.00145486	0.497906	Nuak2	NM_028778
A_51_P507778	0.195902	-1.00646	0.52551	-0.676857	0.165148	1.1e-06	0.000328326	7.31e-05	0.497765	4632417N05Rik	NM_028725
A_51_P432538	0.342598	-1.00744	0.313486	-1.03655	0.0077975	3.71e-07	0.00510725	6.01e-07	0.497429	H2-T10	NM_010395
A_51_P175699	-1.00686	-1.00895	0.103593	0.1015	8.49e-07	1.41e-07	0.223142	0.218079	0.496907	1700020C11Rik	NM_026443
A_51_P109369	0.280064	-1.00974	-0.501858	-1.79166	0.032302	6.11e-07	0.000287616	8.71e-09	0.496635	Fbxo32	NM_026346
A_52_P60074	0.198309	-1.01052	-0.630441	-1.83928	0.116434	2.19e-06	0.00012364	1.41e-08	0.496366	Mylk2	AK079396
A_52_P143477	0.179212	-1.01119	-0.639932	-1.83034	0.520971	0.000177881	0.00253855	1.37e-06	0.496136	NA	NM_009443
A_51_P426014	-0.0322878	-1.01159	-0.511184	-1.49049	0.814937	7.82e-07	0.000289695	6.78e-08	0.495999	Golph3l	NM_146133
A_52_P672437	-0.62749	-1.01161	0.734511	0.350394	0.00035852	2.12e-06	1.71e-05	0.00536728	0.495993	E330037M01Rik	AK033305
A_51_P458451	0.637131	-1.0118	-0.52	-2.16893	5.28e-05	1.66e-07	6.6e-05	5.37e-10	0.495928	Adipoq	NM_009605
A_51_P381170	-1.49309	-1.01216	0.127947	0.608879	1.55e-06	3.02e-06	0.37862	0.000684517	0.495804	NA	AK031095
A_52_P387724	-0.505983	-1.01224	-1.04147	-1.54772	0.000288803	1.64e-07	3.08e-07	8.1e-09	0.495777	NA	NM_009332
A_52_P328350	-1.05066	-1.01292	0.069298	0.107041	6.28e-06	9.73e-07	0.59933	0.426639	0.495544	Ryr3	XM_619795
A_51_P143951	-0.987249	-1.01297	0.057055	0.0313385	0.000833098	0.000154392	0.829857	0.913795	0.495527	Astn1	NM_007495
A_51_P185897	0.000990023	-1.01305	0.149374	-0.864667	0.997769	0.000174041	0.562113	0.00221642	0.495497	NA	AK039250
A_51_P370008	-0.043031	-1.01349	-0.212685	-1.18314	0.861013	5.67e-06	0.140106	3.24e-06	0.495347	Ceacam18	NM_028236
A_51_P439966	0.690023	-1.01464	-1.92122	-3.62589	4.8e-05	3.42e-07	1.64e-08	9.44e-11	0.494951	Ggh	NM_010281
A_51_P319022	-0.433066	-1.0148	-0.461657	-1.04339	0.0084881	4.55e-06	0.00436192	1.59e-05	0.494897	Cxcr3	NM_009910
A_52_P224125	-0.0635005	-1.01533	0.214876	-0.73695	0.66669	2.35e-07	0.0319096	7.93e-06	0.494716	NA	NM_001033193
A_51_P354681	-0.108916	-1.01742	-0.541741	-1.45025	0.806646	0.000916078	0.0459855	0.000128818	0.493998	Mgat4c	NM_026243
A_51_P458258	-2.11982	-1.01993	-2.26168	-1.16179	5.44e-08	7.27e-07	8.73e-09	4.92e-07	0.493141	Ccl19	NM_011888
A_52_P188827	0.695973	-1.0212	0.0450893	-1.67209	3.21e-06	1.4e-08	0.566956	4.12e-10	0.492705	Rasgef1b	NM_181318
A_51_P433194	0.716897	-1.02149	-0.610227	-2.34862	0.0205055	0.000630555	0.0208322	1.35e-06	0.492607	Bcas1	NM_029815
A_52_P781398	0.825403	-1.02181	-1.05529	-2.9025	0.00171852	4.43e-05	4.83e-05	4.15e-08	0.492499	Trp53	NM_011640
A_52_P105537	-0.710429	-1.02243	-1.86132	-2.17332	0.00878225	0.000179801	2.09e-06	6.48e-07	0.492288	Nov	NM_010930
A_51_P280947	-0.114391	-1.02244	-0.459371	-1.36742	0.521623	2.21e-06	0.00177414	3.71e-07	0.492282	Klrd1	NM_010654
A_52_P381484	-0.12882	-1.02318	0.0130975	-0.881259	0.207082	5.65e-08	0.90529	3.9e-07	0.492032	Spon2	NM_133903
A_51_P221072	-0.979893	-1.02342	-0.17044	-0.213965	1.11e-06	5.59e-08	0.0437223	0.0220404	0.491949	C1qtnf7	NM_175425
A_52_P557265	0.0694854	-1.02353	0.529333	-0.563681	0.82686	5.54e-05	0.00840939	0.00943583	0.491912	Cyp39a1	NM_018887
A_52_P149213	-0.0992107	-1.02523	-0.349319	-1.27534	0.361536	5.92e-08	0.000589031	1.66e-08	0.491331	NA	NAP102554-1
A_51_P290619	-0.621372	-1.02627	-0.118862	-0.523761	6.45e-05	5.15e-07	0.247332	9.57e-05	0.490978	AI324046	AK131185
A_52_P118591	-0.15667	-1.02665	-0.3391	-1.20908	0.158152	1.4e-06	0.00689135	6.53e-07	0.490849	Tnfsf13	NM_023517
A_52_P408826	-0.720931	-1.02669	-0.369643	-0.675404	0.000430544	4.75e-06	0.0126085	0.000353154	0.490835	9530083O12Rik	AK079287
A_51_P401659	0.123865	-1.02806	-0.21382	-1.36575	0.356464	3.36e-07	0.0425722	5.66e-08	0.490369	Sspn	NM_010656
A_52_P294834	0.553179	-1.02968	-1.11778	-2.70064	0.000428933	1.73e-06	1.61e-06	7.02e-10	0.489819	2310038E17Rik	AK040349
A_52_P601055	0.200615	-1.03002	0.694817	-0.535819	0.0509303	7.37e-08	3.37e-06	4.2e-05	0.489703	Mtss1	AK129139
A_52_P68419	0.749087	-1.03035	0.479792	-1.29965	1.73e-05	1.54e-07	0.000134556	4.07e-08	0.48959	Arhgap26	NM_175164
A_52_P375764	-0.144677	-1.03111	-0.981322	-1.86776	0.223923	4.58e-07	5.92e-07	3.12e-09	0.489333	Tgoln2	NM_009444
A_51_P388478	-0.457899	-1.03124	-0.336882	-0.91022	0.00504531	1.98e-06	0.0123014	1.29e-05	0.48929	Efnb1	NM_010110
A_51_P494825	0.0714841	-1.03124	-0.217207	-1.31993	0.545631	7.93e-07	0.0437865	1.99e-07	0.48929	NA	XM_356068
A_51_P282297	-1.00691	-1.03197	0.0975083	0.072444	0.000869488	0.000163159	0.705732	0.798626	0.489041	C80008	NM_001033191
A_51_P239737	0.33117	-1.0323	-0.650265	-2.01374	0.231234	0.000210929	0.00693174	1.65e-06	0.488929	Pigr	NM_011082
A_51_P447785	1.3597	-1.03299	-1.63492	-4.02761	1.77e-06	2.94e-06	4.52e-07	2.97e-10	0.488695	Cyp2c55	NM_028089
A_52_P187987	-0.278735	-1.0332	-0.597351	-1.35181	0.00272606	1.42e-08	2.35e-06	2.36e-09	0.488626	2310001H17Rik	AK009064
A_51_P211810	-0.537464	-1.03381	-0.12614	-0.622486	0.000936361	3.27e-06	0.343889	0.000160011	0.488419	Polr2a	NM_009089
A_52_P647326	0.268878	-1.03493	-0.152307	-1.45612	0.0130037	8.34e-08	0.0586669	1.93e-08	0.488039	Acvr1c	NM_001033369
A_51_P466828	-0.390413	-1.03527	0.179799	-0.465054	0.00766243	8.79e-07	0.128692	0.00143286	0.487926	A230106M15Rik	AK039192
A_51_P118320	-0.511725	-1.0357	-0.160852	-0.684827	1.55e-05	5.82e-09	0.0154086	3.35e-07	0.487779	D10Jhu81e	NM_138601
A_51_P472217	-1.28521	-1.04023	0.410524	0.655497	4.6e-08	7.54e-09	2.72e-05	6.99e-07	0.486249	2010317E24Rik	BC070477
A_51_P422893	-0.912854	-1.04481	0.648048	0.516089	6.18e-07	1.23e-08	1.19e-06	9.87e-06	0.484708	Tmem14a	NM_029398
A_52_P489202	-0.345879	-1.04539	-0.748744	-1.44825	0.183779	0.000180381	0.00484874	6.38e-05	0.484515	4732465J04Rik	NM_001001499
A_52_P607255	0.164082	-1.04638	-0.40296	-1.61343	0.454165	1.37e-05	0.0172933	7e-07	0.48418	Slc2a13	NM_001033633
A_52_P392509	-0.11892	-1.04648	0.827514	-0.100046	0.319739	1.25e-07	1.62e-06	0.350504	0.484148	Zh2c2	AK018404
A_51_P374752	-0.256601	-1.0471	-0.136022	-0.926522	0.0345341	5.52e-07	0.144383	1.19e-06	0.48394	Rbp4	NM_011255
A_51_P492047	-0.0558636	-1.04726	-0.79508	-1.78647	0.845613	2.96e-05	0.000708688	1.75e-06	0.483887	ORF9	NM_020622
A_51_P199135	-0.231301	-1.05007	0.444702	-0.374063	0.483305	0.000333705	0.0684868	0.160881	0.482946	Cd83	NM_009856
A_51_P362373	-0.203941	-1.05245	-0.141425	-0.989934	0.45093	7.61e-05	0.527114	0.000284733	0.482149	Gprasp2	XM_896332
A_51_P412526	-0.897123	-1.05341	0.152455	-0.00382666	1.44e-06	3.05e-08	0.058979	0.973482	0.48183	4921513D23Rik	AK035704
A_52_P128032	-0.471274	-1.05418	0.443618	-0.139291	0.0104402	5.88e-06	0.00582737	0.419827	0.48157	3830406C13Rik	NM_178141
A_51_P503757	0.200966	-1.05621	-2.14611	-3.40329	0.242291	3.25e-06	3.83e-08	3.45e-10	0.480893	Igl-V1	AK008094
A_51_P208217	-0.910665	-1.05838	0.192992	0.0452807	5.07e-05	2.26e-06	0.154402	0.795522	0.480172	Cubn	AK035306
A_51_P329949	-0.34943	-1.06504	-0.504712	-1.22032	0.00176219	7.83e-08	9.13e-05	9.45e-08	0.477959	D430015B01Rik	NM_153574
A_52_P202322	-0.785662	-1.06516	0.207109	-0.0723918	0.000149439	2.11e-06	0.124442	0.662555	0.477919	EG432451	AK036470
A_51_P183703	-0.211446	-1.06577	-0.342443	-1.19677	0.0110889	7.15e-09	0.000130481	4.28e-09	0.477716	NA	A_51_P183703
A_51_P241465	0.52528	-1.06593	-0.0473388	-1.63855	0.00195663	4.21e-06	0.644664	1.87e-07	0.477665	Gsn	NM_146120
A_51_P256093	-0.38295	-1.0664	-0.245778	-0.929225	0.00426989	2.61e-07	0.0223134	1.79e-06	0.47751	Map2k6	NM_011943
A_52_P145912	-1.04867	-1.06716	-0.906436	-0.924918	9.09e-07	5.4e-08	4.68e-07	3.52e-07	0.477259	Mylk	NM_139300
A_51_P417747	-0.842188	-1.06718	0.270439	0.045443	3.62e-06	5.14e-08	0.00416367	0.672378	0.47725	Kap	NM_010594
A_51_P387528	-0.154766	-1.06778	0.0195939	-0.893421	0.485798	1.12e-05	0.929411	0.000114819	0.477052	Ak7	AK029555
A_52_P36190	0.62354	-1.06842	-0.266508	-1.95847	8.04e-05	1.43e-07	0.00977562	1.56e-09	0.47684	Fbxo2	NM_176848
A_52_P661503	0.255125	-1.06893	-0.573134	-1.89719	0.0209622	8.7e-08	1.77e-05	3.25e-09	0.476671	Depdc6	AK080874
A_51_P396325	0.215532	-1.06983	0.0386546	-1.24671	0.0784057	4.61e-07	0.78158	5.43e-07	0.476375	Syn2	NM_013681
A_51_P439970	0.929872	-1.0718	-0.761395	-2.76306	2.9e-05	1.51e-06	7.61e-05	3.12e-09	0.475727	Ggh	BC009809
A_51_P294535	-0.161736	-1.07208	0.64481	-0.265538	0.0929106	2.93e-08	3.58e-06	0.00528279	0.475632	Unc5b	NM_029770
A_51_P247114	0.367987	-1.07239	-0.601323	-2.0417	0.0741049	1.86e-05	0.00214983	1.52e-07	0.475531	H2-Bl	NM_008199
A_52_P1140173	-0.617938	-1.07381	0.398185	-0.0576862	0.000225661	4e-07	0.00167931	0.676736	0.475063	Sorbs2	AK039659
A_51_P310850	-0.125191	-1.07409	-0.563621	-1.51252	0.358173	6.57e-07	6.35e-05	3.25e-08	0.474972	Plekha6	BC025841
A_51_P232434	-0.310836	-1.07542	-0.435931	-1.20051	0.00228221	1.94e-08	5.49e-05	1.33e-08	0.474534	Abhd1	AK162873
A_51_P224362	-0.602645	-1.07566	0.45998	-0.0130314	0.000202293	1.01e-06	0.000912842	0.925221	0.474455	Akap6	XM_885325
A_52_P662711	-0.248112	-1.07927	0.0268832	-0.804277	0.141668	2.98e-06	0.882607	8.14e-05	0.473268	Anxa13	NM_027211
A_51_P236267	-0.0111118	-1.08142	0.0490152	-1.0213	0.95045	1.23e-07	0.665419	3.96e-07	0.472562	St8sia4	NM_009183
A_51_P353895	-0.0660292	-1.0822	-1.7628	-2.77897	0.766342	2.46e-06	1.19e-07	1.54e-09	0.472309	Sult1c2	NM_026935
A_52_P354373	-0.908291	-1.08326	0.426162	0.251191	1.02e-06	1.71e-08	6.1e-05	0.00518287	0.47196	1190002F15Rik	AK138072
A_51_P246677	-0.357265	-1.0839	-0.05242	-0.779051	0.00480007	1.47e-07	0.649903	5.36e-06	0.471753	Rec8L1	NM_020002
A_52_P70796	-1.45482	-1.08528	-0.434743	-0.0651973	1.18e-06	1.04e-06	0.00210744	0.676534	0.471301	Blr1	NM_007551
A_51_P210591	-1.72292	-1.08528	-0.763908	-0.126264	4.6e-08	4.34e-08	1.52e-06	0.183336	0.471301	Fcer2a	NM_013517
A_52_P190373	-0.644948	-1.08564	0.334533	-0.106161	0.000157453	5e-07	0.00856393	0.425981	0.471183	8430437N05Rik	AK018473
A_51_P446927	-0.528049	-1.08637	-0.0481253	-0.606451	0.000257851	1.14e-07	0.670548	3.68e-05	0.470943	Vamp2	NM_009497
A_51_P496462	-0.254923	-1.08699	0.00542188	-0.82664	0.0110909	2.76e-08	0.961963	5.53e-07	0.470744	Casd1	NM_145398
A_52_P562911	-0.510726	-1.08762	-0.87707	-1.45396	0.00129107	8.7e-07	1.79e-05	3.37e-07	0.470537	Igh-6	M19902
A_51_P152990	-0.874918	-1.08858	0.233649	0.0199902	1.61e-05	3.26e-07	0.0361849	0.893938	0.470225	Grem2	NM_011825
A_51_P485421	-1.1731	-1.08875	-0.260575	-0.176226	8.64e-07	1.09e-07	0.0102816	0.0945009	0.470169	Igh-6	AK088666
A_51_P369998	-0.787714	-1.08948	-0.10234	-0.404107	3.38e-06	2.29e-08	0.209963	0.000219894	0.46993	Sntg2	NM_172951
A_52_P640413	-0.829675	-1.08963	-0.188075	-0.448027	7.66e-06	9.23e-08	0.0482439	0.000361744	0.469883	Tmem149	NM_145580
A_52_P619738	-0.388489	-1.09017	0.184768	-0.516908	0.000349524	1.27e-08	0.0162915	1.48e-05	0.469707	Gramd3	AK004147
A_52_P625527	-0.127323	-1.09039	-0.83156	-1.79463	0.570766	7.38e-06	9.86e-05	2.09e-07	0.469635	Aqp4	NM_009700
A_52_P98778	-0.986702	-1.09121	0.269817	0.165311	0.0216176	0.00398121	0.489399	0.713019	0.469368	Ang4	NM_177544
A_51_P143190	-0.784448	-1.09608	-0.469345	-0.780978	4.44e-06	2.83e-08	5.21e-05	1.01e-06	0.467786	Lyl1	NM_008535
A_51_P330369	-0.384863	-1.09743	0.73034	0.0177744	0.000235016	7.11e-09	4.52e-07	0.847223	0.467349	Ssx2ip	NM_138744
A_51_P240723	-0.193917	-1.10096	0.400692	-0.506349	0.16607	5.55e-06	0.00264654	0.000883597	0.466207	1700022A21Rik	XM_131911
A_51_P104162	-0.724273	-1.10153	0.212531	-0.164731	9.75e-05	4.81e-07	0.0694907	0.200608	0.466021	Gfod1	BB538651
A_51_P115005	1.33818	-1.10345	0.165538	-2.2761	7.22e-07	2.22e-07	0.121886	9.36e-10	0.465401	Edn1	NM_010104
A_51_P497882	-1.12524	-1.10387	-0.0729262	-0.0515554	3.5e-06	4.19e-07	0.571224	0.72207	0.465267	Creb3l4	NM_030080
A_51_P311199	-0.853151	-1.10606	-0.0548523	-0.307764	0.00544163	0.000220018	0.85883	0.255529	0.46456	Snap91	NM_013669
A_51_P505571	-1.36673	-1.10688	-0.508695	-0.248849	4.6e-08	6.43e-09	6.68e-06	0.00279983	0.464297	Chrdl2	NM_133709
A_51_P459108	-0.479615	-1.10826	-0.801296	-1.42994	0.0136805	1e-05	0.000382037	5.61e-06	0.463853	Insl6	NM_013754
A_51_P269173	-0.829379	-1.11269	-0.844651	-1.12796	4.56e-06	4.13e-08	8.25e-07	6.76e-08	0.46243	Alg9	NM_133981
A_51_P345775	-0.877591	-1.11373	0.130077	-0.106059	1.18e-06	1.27e-08	0.0879436	0.205988	0.462099	Slc2a12	NM_178934
A_51_P124133	0.404932	-1.11393	-0.91668	-2.43554	0.0629862	2.16e-05	0.000147177	5.19e-08	0.462034	Cyp2d9	NM_010006
A_51_P389421	-0.000955918	-1.11416	0.0366288	-1.07657	0.995566	1.06e-07	0.759232	2.75e-07	0.461961	Fahd1	NM_023480
A_51_P485312	0.0296669	-1.11632	-0.561297	-1.70729	0.889735	6.05e-07	0.000261743	3.09e-08	0.461268	Ccl5	NM_013653
A_51_P389988	0.674416	-1.11906	-0.427904	-2.22138	0.000991953	4.29e-06	0.00211662	4.18e-08	0.460393	Slc40a1	NM_016917
A_52_P600555	-0.338043	-1.11984	-0.585221	-1.36702	0.00291466	3.31e-07	0.000102764	1.15e-07	0.460144	Igk-V28	BC002112
A_51_P189361	-0.591395	-1.12273	0.0588235	-0.472514	3.23e-05	2.23e-08	0.51655	7.59e-05	0.459223	Osgin1	NM_027950
A_51_P295410	-0.706187	-1.12309	-0.119353	-0.536255	1.79e-05	4.9e-08	0.194666	5.88e-05	0.45911	Nap1l5	NM_021432
A_51_P366000	-0.828823	-1.12398	0.000756607	-0.294402	1e-05	3.43e-07	0.995794	0.0071998	0.458826	1110014K08Rik	NM_176902
A_51_P474078	-0.517084	-1.1249	0.186119	-0.421694	0.000243161	6.86e-08	0.0498129	0.000565457	0.458535	Sepw1	NM_009156
A_51_P517388	-0.0727127	-1.12504	-0.895648	-1.94797	0.917076	0.00610241	0.0422989	0.000602071	0.45849	1100001H23Rik	NM_025806
A_52_P517683	-1.12707	-1.12604	-0.21226	-0.211228	5.41e-06	1.57e-06	0.0478086	0.0434737	0.458173	Tagln	NM_011526
A_51_P487555	-0.0420244	-1.12659	-0.551598	-1.63616	0.885688	7.45e-06	0.00197305	1.56e-06	0.457998	Cd7	NM_009854
A_52_P83905	1.18204	-1.13015	-0.794133	-3.10633	1.31e-06	1.52e-07	5.02e-06	9.31e-11	0.456868	Slc26a2	NM_007885
A_52_P12243	0.310282	-1.13059	-0.542731	-1.98361	0.00132898	6.97e-09	5.08e-06	1.48e-10	0.456727	Il17rd	BC066804
A_52_P39756	0.681138	-1.13153	0.175976	-1.63669	0.000312002	8.69e-07	0.175769	7.12e-08	0.456433	Garnl4	NM_001015046
A_52_P349912	-0.831377	-1.13273	0.272294	-0.0290592	2.07e-05	6.45e-07	0.0213586	0.826212	0.456052	NA	NM_001033263
A_51_P386358	0.353578	-1.13402	-0.113893	-1.60149	0.00199164	2.94e-08	0.140395	6.64e-09	0.455644	Wwp2	NM_025830
A_52_P246277	-0.813291	-1.13675	-1.18582	-1.50928	0.000349524	4.36e-06	4.94e-06	7.94e-07	0.454783	H2-D1	AK169750
A_51_P438821	-0.465909	-1.13717	-0.868972	-1.54024	0.000290469	3.1e-08	6.22e-07	4.18e-09	0.45465	Pycard	NM_023258
A_51_P337740	-0.19581	-1.13965	-0.090876	-1.03472	0.689449	0.00186142	0.841363	0.0116973	0.453868	Tssk6	NM_032004
A_52_P63680	-0.166949	-1.13982	-1.5314	-2.50427	0.594301	7.51e-05	9.93e-06	1.89e-07	0.453818	Asah3	NM_175731
A_51_P453111	0.672427	-1.14023	-0.27945	-2.09211	2.13e-05	6.08e-08	0.00160213	4.24e-10	0.453686	Hexb	NM_010422
A_51_P209782	-0.272419	-1.14052	-0.64196	-1.51007	0.276973	0.000194471	0.0150039	4.5e-05	0.453595	Cyp2c44	NM_001001446
A_51_P136355	-0.512728	-1.14355	-0.040346	-0.671167	0.00028067	6.58e-08	0.723053	1.32e-05	0.452645	Gng11	NM_025331
A_52_P176659	-0.136721	-1.14487	-2.11566	-3.12381	0.686401	0.000129128	4.1e-06	1.78e-07	0.452231	NA	XM_893587
A_52_P313318	-0.152408	-1.14545	-1.50509	-2.49814	0.831273	0.0057613	0.00123572	9.65e-05	0.452048	1810007E14Rik	NM_025308
A_51_P298802	-1.26491	-1.14681	-0.304328	-0.186227	3.22e-06	3.93e-07	0.00992685	0.138135	0.451623	Bfsp2	S55549
A_52_P549827	0.14961	-1.14881	-0.539944	-1.83836	0.099784	1.09e-08	9.48e-06	3.79e-10	0.450998	Mgst1	NM_019946
A_52_P198435	-0.97717	-1.14999	-0.731756	-0.904579	1.35e-06	2.79e-08	2.2e-06	4.15e-07	0.450627	Rasgrp3	NM_207246
A_52_P28844	-0.629366	-1.15087	0.0190943	-0.502415	0.000232717	2.72e-07	0.89711	0.000631919	0.450352	Nrap	NM_008733
A_51_P238425	-0.787118	-1.15099	0.259691	-0.104181	0.00128474	1.37e-05	0.153309	0.637887	0.450316	Cbr2	NM_007621
A_51_P107020	-0.266843	-1.15132	-0.318335	-1.20281	0.143709	3.31e-06	0.0391524	4.96e-06	0.450212	Kif5a	NM_001039000
A_51_P167527	-0.0881399	-1.15269	-1.14266	-2.20721	0.47008	3.96e-08	1.23e-07	3.45e-10	0.449784	Lum	NM_008524
A_51_P274163	-0.0472324	-1.1528	-0.892023	-1.99759	0.737291	1.1e-07	6.87e-07	1.1e-09	0.449753	Clybl	NM_029556
A_51_P487175	0.571106	-1.15313	-1.90213	-3.62637	0.0143138	3.63e-05	5.97e-07	3.12e-09	0.449647	Acsm3	NM_212441
A_52_P416756	-1.1953	-1.15338	1.44454	1.48647	1.88e-06	5.54e-07	2.35e-07	5.49e-08	0.449572	D17H6S56E-5	NM_033075
A_52_P286421	-0.190894	-1.15403	-0.326212	-1.28935	0.133225	1.5e-07	0.00474962	1.14e-07	0.449368	Snap25	NM_011428
A_51_P433843	0.322002	-1.15611	-0.0989198	-1.57703	0.00109801	1.32e-08	0.21383	3.61e-09	0.448721	NA	NM_001033167
A_51_P321579	-0.573546	-1.15688	0.456249	-0.127083	0.00281044	2.34e-06	0.00444641	0.459668	0.448482	Chd5	AK147563
A_52_P488092	-0.168587	-1.1577	0.854507	-0.134604	0.0724273	7.69e-08	1.47e-06	0.119559	0.448227	BC026657	AB125594
A_51_P155503	0.0182815	-1.15792	-1.46552	-2.64173	0.944844	1.75e-06	5.13e-07	2.91e-09	0.448157	Klk1b8	NM_008457
A_51_P249118	0.677072	-1.15987	-0.864458	-2.7014	0.00251721	1.54e-05	0.000678801	1.89e-07	0.447552	Abcb4	NM_008830
A_52_P884135	-0.602398	-1.16025	0.322414	-0.235434	8.08e-06	6.82e-09	0.000416108	0.00499322	0.447436	NA	AK085881
A_52_P88878	-0.198177	-1.16105	-0.394734	-1.35761	0.25727	1.59e-06	0.00838893	8.64e-07	0.447186	Nope	NM_020043
A_51_P394383	-0.642926	-1.16168	0.950962	0.432207	4.59e-06	3.83e-09	6.14e-08	3.31e-05	0.446991	Malat1	BC004722
A_51_P103594	-0.476487	-1.16493	0.276794	-0.411646	8.64e-05	8.27e-09	0.00141755	0.000116695	0.445987	9430073N08Rik	AK020485
A_51_P182131	-0.62802	-1.16626	-0.410206	-0.948442	0.0015292	2.2e-06	0.00860796	2.91e-05	0.445576	NA	NM_001033304
A_51_P149313	-0.129393	-1.16771	0.232855	-0.805462	0.124955	2.95e-08	0.00676056	4.16e-07	0.445127	Cep63	BC048718
A_52_P277104	-1.67637	-1.17006	-0.644644	-0.138338	5.14e-08	2.81e-08	7.05e-06	0.152884	0.444403	NA	NM_001033350
A_51_P188993	-0.779483	-1.17007	0.304497	-0.0860873	2.5e-05	6.28e-07	0.00473475	0.350882	0.4444	Dhrs7c	AK003267
A_51_P270635	0.511831	-1.1702	0.0595897	-1.62245	0.00447671	1.33e-05	0.681256	2.43e-06	0.444359	2810423A18Rik	AK013141
A_52_P441294	-0.758279	-1.17056	-0.407461	-0.81974	0.00527517	5.14e-05	0.059049	0.00184413	0.44425	NA	AK163864
A_52_P199614	-1.11694	-1.1714	-0.582491	-0.636943	2.86e-05	2.89e-06	0.0010751	0.000971455	0.443992	NA	AK155186
A_51_P414115	-0.226434	-1.17447	-0.523654	-1.47169	0.0939025	4.78e-07	0.000777018	3.09e-07	0.443046	Naprt1	NM_172607
A_51_P259029	-0.957736	-1.17626	-0.097092	-0.31562	0.00160518	7.67e-05	0.719126	0.207253	0.442496	Dusp26	NM_025869
A_51_P479618	-0.324462	-1.17907	-0.200887	-1.05549	0.00266432	2.97e-07	0.0409632	2.63e-07	0.441637	Rdh5	NM_134006
A_51_P503756	-0.331095	-1.17968	-2.84612	-3.6947	0.384233	0.000658312	9.91e-07	2.57e-07	0.44145	Igl-V1	AK008094
A_51_P369381	-0.496157	-1.17975	-0.259996	-0.943591	0.000124259	6.45e-08	0.00664573	2.73e-07	0.441428	1110021L09Rik	AK003902
A_52_P275678	-0.969476	-1.18139	0.265958	0.05404	8.25e-06	1.84e-07	0.0203538	0.698499	0.440925	Gpr135	NM_181752
A_52_P118970	-0.216844	-1.18372	-0.146885	-1.11376	0.0455119	3.44e-08	0.110317	1.1e-07	0.440215	9130206I24Rik	AK078937
A_51_P226483	0.732093	-1.18509	-0.490829	-2.40801	0.000125976	3.79e-07	0.000731877	1.76e-09	0.439796	Spnb4	NM_032610
A_51_P124485	-0.124555	-1.19002	-0.14251	-1.20798	0.340302	8.57e-08	0.168125	1.41e-07	0.438296	Casd1	AK087204
A_51_P210403	-0.971446	-1.19187	0.223062	0.0026353	0.000278393	1.01e-05	0.225701	0.992065	0.437734	4930403L05Rik	NM_026128
A_51_P110830	-1.06734	-1.19252	-0.0792456	-0.204425	0.000200081	2.21e-05	0.695792	0.283019	0.437538	Adamts8	NM_013906
A_51_P184936	-0.181976	-1.19294	0.0610168	-0.94995	0.547225	4.75e-05	0.820126	0.000666287	0.43741	Zbp1	NM_021394
A_51_P155604	0.0077187	-1.19476	-0.957173	-2.15965	0.952867	1.17e-08	3.4e-07	4.17e-10	0.436859	Eif4ebp3	NM_201256
A_51_P464669	0.32265	-1.19624	-0.215148	-1.73403	0.00272789	2.84e-08	0.021246	5.14e-09	0.436412	Nr1h4	NM_009108
A_51_P478303	0.603394	-1.19637	-0.839158	-2.63892	0.0011628	9e-07	2.75e-05	2.02e-09	0.436373	Cyp2d9	NM_010006
A_51_P438820	-0.528979	-1.19742	-1.09365	-1.76209	0.000171698	3.22e-08	1.77e-07	2.21e-09	0.436055	Pycard	NM_023258
A_51_P394244	-0.0333601	-1.20384	-0.776132	-1.94661	0.881235	5.16e-07	3.2e-05	1.63e-08	0.434118	Rapgefl1	XM_484075
A_52_P371922	-0.0215219	-1.20508	-0.617459	-1.80102	0.918062	4.61e-07	0.000280709	7.08e-08	0.433745	Dgkh	XM_484397
A_51_P176086	-0.586358	-1.20541	-0.619698	-1.23875	0.0322762	6.78e-05	0.0124338	0.00038224	0.433646	Ffar2	NM_146187
A_52_P348256	-0.893763	-1.20562	0.288429	-0.0234315	3.16e-06	2.63e-08	0.003553	0.84386	0.433582	Mup1	BC037152
A_51_P506045	0.369297	-1.20712	0.55353	-1.02289	0.000247801	2.48e-09	2.72e-06	1.61e-08	0.433132	Pgcp	NM_018755
A_51_P278653	-0.610947	-1.20861	-0.0265846	-0.624248	0.000307489	1.96e-07	0.855545	0.000120174	0.432685	Rprm	NM_023396
A_52_P671132	-0.00471926	-1.20938	2.22141	1.01675	0.9875	2.79e-06	5.3e-08	2.75e-05	0.432455	Dner	NM_152915
A_51_P504028	-0.789802	-1.21062	-0.817208	-1.23803	0.00174646	1.34e-05	0.000431876	2.5e-05	0.432081	St6galnac1	NM_011371
A_51_P343218	-1.02209	-1.2112	0.220229	0.0311208	0.000554216	3e-05	0.309978	0.912969	0.431909	Camk2a	NM_009792
A_52_P104658	-0.946218	-1.21262	0.301001	0.0345963	7.08e-06	1.03e-07	0.00783635	0.803417	0.431483	Krt6a	NM_008476
A_51_P467110	-0.261282	-1.21674	-0.854764	-1.81022	0.196743	7.58e-06	0.000364049	1.3e-06	0.430255	Dpp4	NM_010074
A_52_P278497	-0.0663007	-1.21837	-1.00904	-2.16111	0.528043	8.54e-09	1.07e-07	3.66e-10	0.429768	Eif4ebp3	NM_201256
A_52_P637988	-0.176242	-1.21983	-0.0227644	-1.06635	0.778123	0.0043038	0.962839	0.00967536	0.429334	Slc1a1	NM_009199
A_51_P256842	-1.20971	-1.22203	-0.0919742	-0.104292	2.13e-07	8.54e-09	0.260947	0.237962	0.42868	Yif1b	NM_029887
A_52_P122393	-0.637373	-1.22416	0.584307	-0.00248466	0.00415188	5.95e-06	0.00256671	0.992168	0.428045	Ccdc131	XM_147426
A_52_P868419	0.557509	-1.2248	-0.389476	-2.17179	0.00324475	5.16e-06	0.0192579	4.07e-08	0.427856	NA	AK033632
A_52_P357611	-0.128944	-1.22504	0.247185	-0.84891	0.631391	1.95e-05	0.147306	0.000308997	0.427786	Neu3	NM_016720
A_51_P179878	-1.28613	-1.22563	0.169294	0.229792	0.00560669	0.00445311	0.63949	0.488124	0.427612	2900019G14Rik	BC078451
A_51_P435363	-0.898282	-1.22649	0.240059	-0.08815	0.00230894	4.99e-05	0.302824	0.757783	0.427356	Lipe	NM_010719
A_51_P477692	1.00196	-1.2265	-0.215063	-2.44352	0.000145821	4.93e-06	0.216033	2.59e-08	0.427353	Fa2h	NM_178086
A_51_P348617	-0.682285	-1.22711	-0.116967	-0.661788	1.39e-05	4.61e-08	0.189528	4.98e-06	0.427173	2310045N01Rik	AK009829
A_52_P512201	-0.158612	-1.22896	0.565929	-0.504417	0.0679324	4.44e-09	4.58e-06	1.67e-05	0.426625	5830484A20Rik	NM_175397
A_52_P393781	-0.995673	-1.22979	0.171747	-0.0623681	6.42e-05	1.78e-06	0.272711	0.745448	0.42638	Bcat2	NM_009737
A_52_P105374	-0.964108	-1.23097	0.291958	0.0250928	0.0696423	0.0139898	0.503367	0.962447	0.42603	5830417I10Rik	AK049055
A_51_P392577	-0.457136	-1.23239	-0.416234	-1.19148	0.000547585	1.14e-07	0.000386941	2.12e-07	0.425613	Ccbl2	NM_173763
A_51_P315682	-0.0187788	-1.23366	1.00714	-0.207744	0.943409	9.9e-07	8.93e-06	0.183596	0.425238	Igf2bp2	NM_183029
A_52_P88296	-0.69816	-1.23473	0.481303	-0.0552644	0.000271241	7.35e-07	0.00060957	0.692896	0.424923	NA	NAP057940-1
A_51_P272283	0.402401	-1.23609	-0.0166334	-1.65512	0.000367614	6.6e-09	0.86641	9.54e-10	0.424523	Cmbl	NM_181588
A_51_P462533	-0.26892	-1.23722	-0.152529	-1.12082	0.090197	5.81e-07	0.270026	2.93e-06	0.424191	Syt7	AK028004
A_51_P231557	0.0384931	-1.23759	1.36989	0.0938128	0.933713	0.000110134	6.66e-05	0.768688	0.424081	7530428D23Rik	BB269773
A_51_P308048	-0.0656333	-1.23822	0.206117	-0.966468	0.653617	2.61e-07	0.0653413	1.5e-06	0.423896	Cmtm8	NM_027294
A_51_P166131	-1.00273	-1.23904	0.200992	-0.0353193	0.000116352	3.51e-06	0.23479	0.874604	0.423654	4930555F03Rik	AK016128
A_51_P516006	0.647499	-1.24079	-0.0360156	-1.9243	0.001225	4.62e-06	0.858115	1.07e-07	0.423141	Ntrk2	AK018789
A_52_P119060	-0.768344	-1.24719	-0.564968	-1.04382	0.000302399	1.03e-06	0.000883378	1.04e-05	0.421267	Acpp	NM_207668
A_52_P627761	-8.36e-05	-1.24873	-1.23037	-2.47902	0.999714	3.03e-07	6.96e-07	4.85e-09	0.420817	Ethe1	NM_023154
A_51_P469098	-0.482728	-1.25193	0.770642	0.00143594	0.000901643	7.09e-08	6.82e-06	0.992576	0.419885	Mtmr4	NM_133215
A_51_P383524	0.0653107	-1.25209	0.205435	-1.11197	0.693079	9.35e-08	0.0601637	5.03e-07	0.419839	Art3	NM_181728
A_51_P309920	0.425588	-1.25274	0.047723	-1.63061	0.00220827	7.24e-08	0.701901	1.36e-08	0.41965	Itga8	NM_001001309
A_51_P358037	0.928251	-1.25331	-0.0443366	-2.22589	0.00927084	0.000426225	0.893677	4.18e-06	0.419486	Abi3bp	XM_619396
A_52_P161630	0.769372	-1.25571	-0.460444	-2.48553	1.33e-05	2.74e-08	0.000169965	2.15e-10	0.418787	St6gal1	NM_145933
A_51_P433157	-0.840404	-1.25656	0.309956	-0.106198	0.000530535	2.51e-06	0.0419324	0.590186	0.418541	NA	NM_177224
A_51_P278868	-1.00113	-1.25778	-0.253764	-0.510413	4.99e-07	4.52e-09	0.0025444	1.88e-05	0.418187	H2-DMb1	NM_010387
A_51_P497006	-1.21897	-1.25864	0.325847	0.286176	7.08e-06	1.65e-06	0.0262968	0.0423693	0.417937	Srd5a2	NM_053188
A_52_P559076	-0.86934	-1.26154	-0.203398	-0.595598	1.79e-05	1.05e-07	0.068552	0.000135745	0.417099	NA	NM_001033281
A_52_P473953	-0.00336188	-1.26239	0.233601	-1.02543	0.983315	1.17e-08	0.00929014	1.18e-07	0.416852	Ctdspl	NM_133710
A_51_P475378	-0.144002	-1.26265	-0.00365613	-1.12231	0.306723	1.08e-07	0.982196	5.83e-07	0.416777	Echdc3	NM_024208
A_52_P336958	-0.224434	-1.26327	0.513628	-0.52521	0.229307	1.47e-06	0.00250099	0.00369362	0.416598	NA	AK154331
A_52_P637172	0.30519	-1.26554	-0.770058	-2.34079	0.0281563	1.49e-07	1.57e-05	1.52e-09	0.415943	4833409A17Rik	XM_193941
A_51_P310649	-0.262748	-1.26564	-0.328882	-1.33177	0.0171594	1.04e-07	0.00644799	4.09e-07	0.415915	Arsa	NM_009713
A_52_P393314	-0.341846	-1.26623	0.514578	-0.40981	0.0166845	1.63e-07	0.000401774	0.00352502	0.415743	NA	NM_011027
A_52_P453013	-0.0935628	-1.26691	-1.252	-2.42535	0.758526	9.57e-06	1.62e-05	7.14e-08	0.415548	Fabp2	NM_007980
A_52_P666754	-0.597481	-1.27437	0.33081	-0.346076	0.00693518	1.27e-05	0.059971	0.0644816	0.413406	Ppp1r9a	NM_181595
A_52_P259126	0.209061	-1.27725	-0.280829	-1.76714	0.347541	7.33e-06	0.152945	2.27e-06	0.412581	NA	TC1520898
A_51_P264695	-0.236098	-1.27735	0.941558	-0.0996952	0.0487751	2.29e-07	4.18e-06	0.385256	0.412552	Crym	NM_016669
A_51_P119776	-1.40177	-1.27816	-0.0109808	0.112628	3.26e-07	3.04e-08	0.933754	0.303903	0.41232	Synpo2	XM_901510
A_52_P516409	0.0256121	-1.27909	-0.26828	-1.57298	0.938867	5.4e-06	0.137695	1.96e-06	0.412056	Col4a6	BC004800
A_52_P23225	-0.382791	-1.27993	0.0963257	-0.800818	0.205638	8.14e-05	0.747858	0.00571871	0.411814	Gpc3	NM_016697
A_52_P99848	-1.27737	-1.28255	0.600561	0.59538	5.14e-08	1.53e-09	1.48e-06	1.85e-06	0.411069	Pik3cd	NM_008840
A_51_P355702	1.29608	-1.28255	0.0849178	-2.49372	0.00480007	0.00144715	0.853455	1.6e-05	0.411068	Trpv3	AK004128
A_51_P305508	-0.227089	-1.28388	0.492355	-0.564432	0.0205103	7.07e-09	3.17e-05	1.53e-05	0.410691	Rerg	NM_181988
A_51_P473259	-0.262315	-1.28431	-0.841615	-1.86361	0.00797097	5.86e-09	4.28e-07	4.56e-10	0.410566	Dpyd	NM_170778
A_51_P175667	-0.446722	-1.28432	-1.38609	-2.22369	0.0881686	3.04e-05	2.41e-05	5.84e-07	0.410565	Lpo	NM_080420
A_51_P359603	-0.525269	-1.2877	-0.591156	-1.35359	4.06e-05	1.53e-08	1.03e-05	6.69e-09	0.409604	Itgb7	NM_013566
A_51_P296013	-0.958811	-1.29245	0.187008	-0.146628	0.000112786	4.88e-06	0.278807	0.391971	0.408258	Sirpa	NM_007547
A_52_P255782	0.270289	-1.29451	-0.654094	-2.21889	0.311855	0.000115078	0.017804	3.64e-06	0.407676	Slco2b1	NM_175316
A_51_P513541	0.666497	-1.30049	0.753846	-1.21315	1.61e-05	2.91e-08	3.46e-06	3.54e-08	0.405987	Rfk	NM_019437
A_51_P468362	-0.282699	-1.30057	0.836528	-0.181347	0.0243619	4.9e-08	3.42e-06	0.113523	0.405965	0610010D24Rik	BC043115
A_51_P417998	-0.139467	-1.30124	-0.641352	-1.80313	0.429755	3.64e-07	0.000190534	4.35e-08	0.405777	Sytl4	NM_013757
A_52_P251690	0.490925	-1.30203	-0.0719901	-1.86495	0.126271	0.000137827	0.830597	1.55e-05	0.405554	Gvin1	NM_029000
A_51_P117581	0.160774	-1.30432	-0.201913	-1.66701	0.162369	6.6e-08	0.0249992	6.55e-09	0.404912	Cables1	NM_022021
A_51_P384230	0.525107	-1.30624	-0.646247	-2.47759	0.0232981	8.37e-06	0.00263747	6.77e-08	0.404375	Sgk2	NM_013731
A_51_P413147	-0.182251	-1.30841	-2.54356	-3.66972	0.639551	0.000168779	3.65e-06	1.91e-07	0.403765	Klk1b3	NM_008693
A_52_P391624	-0.318172	-1.31158	0.901396	-0.0920101	0.0064029	1.72e-08	7.77e-07	0.388766	0.40288	2300002D11Rik	BC049168
A_51_P183581	-0.651848	-1.31189	-1.50403	-2.16407	0.000127058	1.01e-07	2.02e-07	6.68e-09	0.402794	Pou2af1	NM_011136
A_52_P447424	-1.32606	-1.31208	-0.0701243	-0.0561369	8.49e-07	6.28e-08	0.563754	0.677565	0.40274	Phxr5	NM_008836
A_52_P456243	-1.48652	-1.31654	-0.397844	-0.227861	0.00162162	0.000992685	0.273988	0.592783	0.401496	2900079G21Rik	AK013806
A_52_P284889	-0.38123	-1.31728	-0.0263265	-0.96238	0.000285876	1.84e-09	0.760065	4.23e-08	0.40129	Prkcz	NM_008860
A_51_P317882	0.587265	-1.31733	-0.472717	-2.37731	0.0407818	5.23e-05	0.0526901	7.19e-07	0.401276	Sectm1b	NM_026907
A_51_P124315	-0.72974	-1.31848	-0.614421	-1.20316	1.72e-05	1.64e-08	1.53e-05	6.13e-08	0.400957	BC034076	NM_177649
A_52_P87997	-0.229159	-1.3211	-1.51529	-2.60723	0.453107	0.000116921	5.66e-05	4.28e-07	0.40023	AI987692	NM_177912
A_51_P110168	-0.461377	-1.32306	0.643879	-0.217806	0.0162023	9.14e-06	0.00315552	0.241474	0.399686	Ing5	NM_025454
A_51_P451458	-0.154012	-1.32549	-0.168661	-1.34014	0.189441	2.18e-08	0.0827531	3.54e-08	0.399014	Mamdc2	NM_174857
A_52_P230688	0.0540321	-1.32736	-1.16403	-2.54543	0.843543	1.63e-06	8.04e-06	1.17e-08	0.398496	2210417D09Rik	NM_025620
A_52_P682960	-0.880679	-1.3282	0.231927	-0.215591	0.0071376	0.000145227	0.23661	0.362951	0.398266	Ccdc131	XM_147426
A_52_P200465	-0.777003	-1.32843	0.581919	0.0304905	4.38e-05	7.6e-08	0.000108432	0.837086	0.398201	Agpat1	NM_018862
A_52_P219194	-0.725481	-1.32937	0.393721	-0.210172	0.000365905	4.54e-07	0.00796488	0.170705	0.397941	Kcnq3	NM_152923
A_51_P418809	-1.0872	-1.33245	0.650188	0.404935	4.72e-06	9.42e-08	5.64e-05	0.00338385	0.397093	NA	AK012942
A_52_P84928	-1.04525	-1.33274	0.204383	-0.0831043	0.00123746	4.14e-05	0.422458	0.787319	0.397013	Pak3	NM_008778
A_52_P61864	0.202856	-1.33352	0.192792	-1.34359	0.169782	1.47e-07	0.117743	2.72e-07	0.396798	Wnt2	NM_023653
A_52_P665197	-0.0135872	-1.33659	-1.45471	-2.77771	0.944374	9.92e-08	2.87e-07	1.15e-09	0.395957	NA	NAP111137-1
A_51_P266403	-1.37923	-1.33696	0.0707681	0.113037	5.7e-05	1.56e-05	0.74943	0.605515	0.395855	2310005C01Rik	AK009163
A_51_P378789	-1.84551	-1.33981	-1.30083	-0.795135	2.17e-06	3e-06	6.22e-06	0.000516222	0.395072	Cxcl13	NM_018866
A_52_P602847	-2.91054	-1.34027	-1.42404	0.146225	9.02e-08	1.93e-06	2.04e-06	0.451611	0.394946	Glycam1	NM_008134
A_51_P299339	-1.10849	-1.34076	0.223392	-0.00888503	0.000186679	7.19e-06	0.265385	0.974518	0.394812	Klf15	NM_023184
A_51_P234113	-0.370508	-1.3451	-0.718893	-1.69348	0.000778194	3.85e-09	1.25e-06	9.34e-10	0.393627	Nod1	NM_172729
A_51_P118246	-0.0213827	-1.34675	-0.39064	-1.716	0.887778	7.65e-09	0.000305896	1.64e-09	0.393178	4930430E16Rik	NM_028672
A_51_P293665	-0.53786	-1.34766	0.555132	-0.254672	5.79e-05	4.53e-09	1.15e-05	0.00663866	0.392928	Cxx1b	AK003646
A_52_P589568	0.131916	-1.34954	0.38691	-1.09455	0.432173	9.41e-07	0.0107513	4.17e-06	0.392417	Foxo6	NM_194060
A_52_P559478	-0.84482	-1.35023	0.427302	-0.0781065	5.22e-05	1.56e-07	0.00229411	0.607214	0.39223	Ccdc131	XM_147426
A_52_P612137	-0.398024	-1.35595	0.0290637	-0.928865	0.0606206	3.3e-06	0.901379	0.000180362	0.390677	Runx1t1	NM_009822
A_51_P117618	0.0957188	-1.3586	-1.10795	-2.56227	0.527083	1.19e-07	2.46e-06	2.86e-09	0.38996	Ethe1	NM_023154
A_51_P249180	-0.525489	-1.35861	-0.958132	-1.79125	0.00506404	1.03e-06	5.57e-05	4.49e-07	0.389958	Klk1b24	NM_010643
A_51_P172935	-0.915759	-1.36026	0.394163	-0.0503369	0.0196872	0.000432635	0.237155	0.910217	0.389512	Lyzl1	NM_026092
A_52_P192462	-1.39486	-1.36089	-0.00964949	0.0243262	2.9e-07	1.61e-08	0.941292	0.847439	0.389342	Rims1	BC055294
A_51_P296528	0.11256	-1.36485	0.179907	-1.2975	0.256158	3.83e-09	0.0275717	9.01e-09	0.388275	Lass4	NM_026058
A_51_P403477	0.888452	-1.36561	-0.771143	-3.0252	0.00128331	1.15e-05	0.00231386	7.81e-08	0.388072	Dio1	NM_007860
A_51_P191519	-0.765107	-1.36621	-1.01054	-1.61165	2.83e-05	5.65e-08	5.24e-07	1.07e-08	0.387909	Stard10	NM_019990
A_51_P375138	0.933676	-1.37058	-0.38169	-2.68594	0.000551141	4.88e-06	0.0465307	2.95e-08	0.386737	Cd36	L23108
A_51_P184886	0.948012	-1.37096	-0.129624	-2.4486	8.98e-06	4.86e-08	0.252856	6.95e-10	0.386634	Abcg2	NM_011920
A_51_P470542	-0.198109	-1.37115	-0.680802	-1.85384	0.281132	5.36e-07	0.000258344	7.99e-08	0.386584	Apob	XM_137955
A_52_P316046	-0.988601	-1.37216	0.075916	-0.30764	0.00103854	1.65e-05	0.776888	0.204947	0.386313	Zfp533	NM_178723
A_52_P152847	-0.939357	-1.37291	0.261454	-0.1721	0.00902054	0.000165018	0.397029	0.628023	0.386112	NA	NM_008381
A_51_P305453	0.275061	-1.37589	-0.525744	-2.17669	0.0863991	2.64e-07	0.000953308	9.74e-09	0.385316	NA	A_51_P305453
A_51_P106488	-0.856643	-1.37949	-0.0642496	-0.587093	2.57e-05	6.86e-08	0.627059	0.000207166	0.384355	Speg	AK208635
A_52_P577748	-0.877686	-1.37984	-0.06608	-0.568233	2.24e-06	5.07e-09	0.466572	1.85e-05	0.384262	Lpxn	NM_134152
A_52_P17466	-0.59396	-1.3822	0.35292	-0.435319	7.56e-05	1.11e-08	0.00107074	0.00038359	0.383634	NA	AA545095
A_52_P575217	-1.08738	-1.38508	-0.943244	-1.24095	1.44e-06	1.98e-08	1.65e-06	1.66e-07	0.382868	Mylk	NM_139300
A_51_P406734	-0.485926	-1.386	0.323574	-0.576503	0.00510034	1.16e-06	0.0346358	0.000953844	0.382623	St8sia5	NM_153124
A_52_P476560	-0.0801933	-1.38643	-0.338154	-1.64439	0.425581	1.53e-08	0.00102811	2.6e-09	0.382509	Tpcn1	NM_145853
A_51_P157255	-0.0455432	-1.387	-0.274869	-1.61633	0.742568	7.07e-09	0.0041709	3.12e-09	0.382359	Sdc2	NM_008304
A_51_P251022	-1.49079	-1.39042	-0.772761	-0.672385	4.49e-05	1.33e-05	0.00288601	0.0097317	0.381455	Plscr2	NM_008880
A_51_P511646	0.590126	-1.39124	1.04646	-0.934903	0.00010728	2.42e-08	1e-06	2.17e-06	0.381238	Ndfip2	NM_029561
A_51_P481159	-1.05536	-1.39154	-2.30041	-2.6366	2.24e-06	2.06e-08	4.4e-09	2.23e-10	0.381157	Cbr3	NM_173047
A_51_P258721	-0.18062	-1.39323	-0.839151	-2.05176	0.51113	6.55e-06	0.000537692	4.89e-07	0.380711	Tpsg1	NM_012034
A_51_P324583	-0.870198	-1.3947	-0.867461	-1.39197	3.01e-05	1.4e-07	4.01e-06	1.04e-07	0.380323	Scamp4	BC060071
A_51_P146080	-0.683176	-1.39673	-0.474722	-1.18828	5.62e-05	8.63e-08	0.000495673	2.25e-07	0.379788	Pak6	AK028788
A_52_P333529	0.258607	-1.39717	-0.562191	-2.21797	0.0110749	4.15e-09	1.27e-05	1.92e-10	0.379673	Slco2a1	BC024728
A_51_P304109	0.241294	-1.39873	-1.11703	-2.75705	0.040899	4.13e-08	1.08e-06	7.72e-10	0.379263	Cyp2c39	NM_010003
A_51_P156547	-0.978341	-1.39897	-0.808474	-1.2291	8.28e-07	4.02e-09	1.13e-06	3.33e-08	0.379201	Tcf3	NM_009332
A_52_P84415	-0.582903	-1.40079	0.306408	-0.511477	0.00912347	4.83e-06	0.0612467	0.00727308	0.378722	L3mbtl2	NM_145993
A_51_P479321	-0.206692	-1.40463	0.0424606	-1.15548	0.114218	2.18e-07	0.775019	7.99e-07	0.377716	Acss1	NM_080575
A_52_P323315	0.016525	-1.40607	-0.557769	-1.98036	0.93171	2.4e-08	8.11e-05	2.28e-09	0.377338	Tmem151	NM_001001885
A_51_P277336	0.0688506	-1.40689	0.457033	-1.01871	0.590502	1.28e-07	0.000300761	5.3e-07	0.377124	Sdpr	NM_138741
A_51_P245414	-0.228299	-1.40724	-2.2197	-3.39865	0.415302	1.01e-05	4.64e-07	1.03e-08	0.377031	Klk1	NM_010639
A_51_P103706	0.377956	-1.40734	-1.08885	-2.87414	0.0060308	1.77e-07	2.33e-06	5.37e-10	0.377007	Cyp2c29	NM_007815
A_51_P264227	-0.611671	-1.4174	-0.666739	-1.47247	0.000110671	1.7e-08	1.47e-05	2.09e-08	0.374385	Gpr160	XM_130823
A_51_P251205	-1.14668	-1.41815	-0.0622019	-0.33367	6.87e-07	2.06e-08	0.536012	0.00137172	0.374191	Psd	NM_028627
A_52_P522255	-0.441421	-1.41845	-0.00106507	-0.978089	0.150161	4.5e-05	0.997615	0.00182901	0.374115	Pitx1	NM_011097
A_51_P180492	-0.306754	-1.42021	-0.139576	-1.25303	0.0110902	3.1e-08	0.204727	3.09e-07	0.373657	Dbp	NM_016974
A_51_P470475	-1.35565	-1.42873	-0.892113	-0.965197	5.24e-05	1.49e-05	0.00101361	0.000447894	0.371457	4933426G20Rik	AK016931
A_52_P561746	-0.185274	-1.4288	0.856688	-0.386833	0.109465	1.27e-08	1.61e-06	0.00140002	0.371441	Arhgap6	NM_009707
A_51_P205779	-0.662024	-1.42996	0.678709	-0.0892285	0.0053557	3.1e-06	0.00157658	0.704663	0.371141	Cd5l	NM_009690
A_52_P365615	0.151054	-1.43509	-1.55494	-3.14109	0.708441	5.09e-05	3.78e-05	1.28e-07	0.369823	Ces5	NM_172759
A_51_P317887	0.20104	-1.43683	-0.568745	-2.20662	0.646624	9.9e-05	0.0407611	1.47e-05	0.369378	Sectm1b	NM_026907
A_51_P520426	-0.4444	-1.44542	-0.457708	-1.45873	0.00118403	1.5e-08	0.000292346	2.35e-08	0.367185	Gfra3	NM_010280
A_52_P74106	-0.438883	-1.44635	-2.61603	-3.6235	0.0245743	3.6e-06	1.06e-07	1.91e-09	0.366949	NA	NM_212451
A_51_P408631	-0.0900739	-1.44779	-0.260357	-1.61807	0.569413	2.68e-07	0.0300858	1.76e-07	0.366583	Slc20a1	NM_015747
A_52_P55661	-0.491148	-1.44845	-0.0159515	-0.973255	0.00615196	1.14e-06	0.940204	2.35e-05	0.366414	Slc5a6	NM_177870
A_52_P283835	0.0504572	-1.44961	-1.75434	-3.2544	0.824293	1.69e-07	1.06e-07	3.79e-10	0.366121	Ccnk	NM_009832
A_51_P212611	-0.755486	-1.45181	0.540894	-0.155428	0.00021571	1.63e-07	0.000764071	0.307241	0.365563	Nat3	NM_008674
A_51_P163953	-0.8968	-1.45436	-0.249179	-0.806738	4.91e-05	1.31e-07	0.0598476	4.44e-05	0.364917	Nsg2	NM_008741
A_51_P362429	-0.757018	-1.45859	-0.131176	-0.832744	3.22e-05	1.96e-08	0.222051	4.78e-06	0.363849	Myh11	NM_013607
A_51_P183261	-0.33302	-1.46062	-3.6338	-4.7614	0.265749	7.5e-05	1.35e-07	2.18e-08	0.363336	Aqp8	NM_007474
A_52_P552788	0.0281463	-1.46321	-0.606663	-2.09802	0.901756	9.68e-08	0.000208149	7.98e-09	0.362685	NA	AK008541
A_52_P528456	-0.941549	-1.46373	0.53862	0.0164372	2.81e-06	1.05e-08	8.17e-05	0.896961	0.362554	3110001A13Rik	NM_025626
A_51_P490817	-0.81433	-1.47089	-0.352069	-1.00863	2.43e-05	2.42e-08	0.00332321	1.19e-06	0.360759	Me2	NM_145494
A_52_P346367	-0.750037	-1.47495	0.425113	-0.299801	0.00107051	1.55e-06	0.00787119	0.0652903	0.359746	Ddx42	NM_028074
A_51_P257496	-0.128824	-1.47559	-0.583661	-1.93043	0.696103	7.73e-06	0.0102571	1.65e-06	0.359585	Ace2	NM_027286
A_51_P497875	-0.773704	-1.47572	0.395891	-0.306126	8.57e-05	6.41e-08	0.00332738	0.0247245	0.359554	Hormad1	NM_026489
A_52_P372901	-1.47446	-1.48049	-0.770063	-0.776093	7.92e-05	1.4e-05	0.00459523	0.00627641	0.358366	Plscr2	NM_008880
A_51_P149852	0.14732	-1.48492	-0.12561	-1.75785	0.179948	5.36e-09	0.172388	2.06e-09	0.357269	Pip5k1c	NM_008844
A_52_P450038	0.432135	-1.48829	-2.24777	-4.1682	0.0130006	2.09e-07	3.33e-08	1.03e-10	0.356434	Aldob	NM_144903
A_51_P176998	-0.847885	-1.49139	0.583289	-0.0602159	1.93e-05	2.3e-08	8.76e-05	0.657051	0.35567	NA	XM_204027
A_52_P140049	0.171602	-1.49279	-0.505768	-2.17016	0.48739	1.6e-06	0.00859199	1.29e-07	0.355325	AI987662	NM_178899
A_51_P349213	-1.85167	-1.49456	-0.658581	-0.301468	3.07e-08	3.29e-09	4.85e-06	0.00336964	0.354889	Fcrl1	NM_178165
A_51_P310886	-1.0897	-1.49702	0.972629	0.565313	1.65e-05	1.47e-07	9.27e-06	0.00109223	0.354285	Trio	AK047015
A_52_P337126	-1.03159	-1.49848	-0.108274	-0.575166	8.32e-06	4.25e-08	0.390333	0.000307676	0.353926	Bves	NM_024285
A_51_P217498	0.0231388	-1.49983	0.280501	-1.24247	0.9048	5.19e-08	0.0256275	8.72e-07	0.353594	Slc2a4	NM_009204
A_51_P336830	1.52034	-1.50119	0.400534	-2.621	1.28e-06	1.46e-07	0.00219519	3.61e-09	0.353261	Fabp4	NM_024406
A_52_P358360	-2.18674	-1.50305	-1.37891	-0.695216	3.63e-07	8.31e-07	2.79e-06	0.000325286	0.352806	Igh-6	AK088666
A_51_P291210	-0.696217	-1.50367	0.452704	-0.354753	0.000213272	1.17e-07	0.000718767	0.0059211	0.352654	2600003E23Rik	NM_027373
A_51_P343833	-1.18258	-1.50524	-0.201569	-0.524229	2.13e-07	1.32e-09	0.0130218	1.96e-05	0.352272	Traf1	NM_009421
A_51_P324690	0.344994	-1.51027	0.0910696	-1.7642	0.087353	5.07e-06	0.525827	1.45e-06	0.351045	Clec2d	NM_053109
A_51_P364250	-0.0382272	-1.5115	-0.681729	-2.155	0.911249	1.95e-06	0.00112063	4.58e-07	0.350747	Itih5	NM_172471
A_51_P467798	0.0983606	-1.51462	0.149974	-1.46301	0.758552	3.22e-06	0.492743	9.56e-06	0.349988	Niban	NM_022018
A_51_P457187	-2.109	-1.5164	-1.61493	-1.02232	1.3e-06	1.49e-06	3.63e-06	0.000149455	0.349558	Tnfrsf13c	NM_028075
A_52_P170188	0.192261	-1.51766	0.0686597	-1.64126	0.0516677	2.26e-09	0.445443	1.83e-09	0.349251	Hcst	NM_011827
A_51_P259773	0.359852	-1.51834	-0.4195	-2.29769	0.00705095	1.64e-08	0.000874071	8.98e-10	0.349087	Slc37a2	NM_020258
A_51_P471177	-0.717231	-1.51871	0.275619	-0.52586	3.68e-05	1.76e-08	0.0143666	0.000307622	0.348998	Stra6	NM_009291
A_51_P139920	-0.141807	-1.51887	0.114943	-1.26212	0.722697	2.64e-05	0.705744	0.000276582	0.348959	Mgll	NM_011844
A_52_P357133	-0.178146	-1.5201	-0.583999	-1.92595	0.0281638	1.29e-09	7.54e-06	6.44e-10	0.348662	Selm	NM_053267
A_51_P283473	-1.51682	-1.52066	-0.398954	-0.402793	9.88e-08	3.67e-09	0.000319807	0.000509411	0.348528	1110018M03Rik	NM_026271
A_51_P386648	-0.0392499	-1.52123	-1.34471	-2.82668	0.832731	2.08e-08	1.55e-07	2.64e-10	0.34839	2010001H14Rik	NM_027227
A_51_P407726	-0.791551	-1.5279	-0.789554	-1.5259	3.01e-05	2.81e-08	1.84e-05	1e-07	0.346783	Zan	NM_011741
A_52_P612928	-0.604269	-1.52828	0.557112	-0.366904	4.76e-05	1.43e-08	5.26e-05	0.000821609	0.346689	Gabbr2	XM_143750
A_51_P443976	0.336043	-1.52961	0.265172	-1.60048	0.0644098	3.11e-07	0.0858927	4.29e-07	0.34637	Ptprr	NM_011217
A_51_P407351	0.0639143	-1.53135	0.476494	-1.11877	0.698646	1.04e-07	0.00109373	9.62e-07	0.345954	Ly75	NM_013825
A_51_P454949	-0.592471	-1.53827	-0.237281	-1.18308	0.0175463	2.79e-06	0.209473	9.86e-05	0.344298	Gstm3	NM_010359
A_51_P401974	-0.528809	-1.54182	-0.31681	-1.32982	0.000296738	1.51e-08	0.00628927	1.64e-07	0.343451	Enpp2	NM_015744
A_51_P352782	0.722984	-1.54199	0.362231	-1.90274	1.6e-05	3.93e-09	0.000784395	1.09e-09	0.343411	Prkce	AK017901
A_51_P232281	-2.04667	-1.54255	0.208162	0.712283	1.27e-06	1.08e-06	0.259131	0.00138982	0.343279	Pla2g2d	NM_011109
A_51_P280723	-0.719613	-1.54513	-0.00329598	-0.82881	5.84e-05	1.6e-08	0.983517	6.48e-06	0.342666	Cmklr1	NM_008153
A_52_P409076	-0.642372	-1.55503	-0.159061	-1.07172	0.000321074	3.77e-08	0.198181	1.85e-06	0.340321	Sema5a	NM_009154
A_52_P173442	-1.0947	-1.5638	0.0628923	-0.406211	0.000120767	1.37e-06	0.788595	0.0516469	0.338258	NA	XM_620248
A_51_P352864	-0.0170659	-1.56562	-0.226729	-1.77528	0.931304	1.25e-08	0.0357451	7.1e-09	0.337833	Olfr570	NM_147110
A_51_P493117	-0.707008	-1.56671	-0.427221	-1.28693	6.34e-05	8.63e-08	0.000650626	1.33e-07	0.337576	Slc16a9	NM_025807
A_52_P632878	0.0926713	-1.5672	-0.703826	-2.36369	0.625379	3.68e-07	0.00026636	1.05e-08	0.337464	NA	XM_354650
A_51_P277683	-1.81692	-1.56982	-0.356657	-0.109556	7.55e-09	5.56e-10	0.000141022	0.161625	0.33685	Ms4a1	M62541
A_51_P273609	-0.196478	-1.57087	-0.813512	-2.1879	0.0201741	1.27e-09	8.37e-07	3.37e-10	0.336606	Itpka	NM_146125
A_51_P476618	-1.04425	-1.57161	-1.00496	-1.53232	2.5e-05	2.5e-07	1.03e-05	4.51e-07	0.336432	Slc12a8	NM_134251
A_51_P235015	-0.382197	-1.57208	-2.73919	-3.92906	0.112071	2.59e-06	7.74e-08	2e-09	0.336324	2010309G21Rik	AK008551
A_51_P213691	-0.534166	-1.57296	-0.320311	-1.35911	0.00633594	2.77e-07	0.0419711	2.05e-06	0.336118	Scnn1a	NM_011324
A_51_P463791	-0.660931	-1.57335	0.27265	-0.639768	0.00111086	3.02e-07	0.0918028	0.00141886	0.336028	2900083I11Rik	BC051947
A_51_P110759	-1.26865	-1.57475	-1.09652	-1.40263	3.86e-05	9.62e-07	3.09e-05	5.69e-06	0.335702	Slc1a1	NM_009199
A_52_P251183	-1.19596	-1.57867	0.0972792	-0.28543	0.000121481	6.28e-06	0.693896	0.168594	0.334789	Tmem177	NM_175106
A_51_P489192	0.577802	-1.58176	-0.510492	-2.67005	0.000136377	2.37e-08	0.000219162	3.39e-10	0.334075	Postn	NM_015784
A_52_P771513	0.438941	-1.5874	-0.188041	-2.21438	0.00503437	3.6e-08	0.130058	3.75e-09	0.332771	Fus	AK082036
A_52_P342202	-0.685902	-1.58808	0.570143	-0.332039	9.24e-05	1.42e-08	0.000104589	0.00848105	0.332613	Mier1	NM_027696
A_51_P118545	-0.156697	-1.58839	0.489982	-0.94171	0.688487	1.84e-05	0.058578	0.00250064	0.332543	S100g	NM_009789
A_52_P100140	-0.701281	-1.58942	0.463607	-0.424531	0.001133	2.26e-07	0.00321947	0.0149744	0.332305	Mitf	NM_008601
A_52_P367520	-0.562827	-1.59628	0.615363	-0.418086	0.000322372	1.09e-08	4.51e-05	0.00151373	0.33073	Nexn	NM_199465
A_51_P378298	-2.54315	-1.59723	-0.940994	0.004922	1.31e-07	2.13e-07	4.75e-05	0.982135	0.33051	Faim3	NM_026976
A_52_P638459	-0.185632	-1.59732	-0.602073	-2.01376	0.513392	4.99e-06	0.0138736	3.27e-06	0.33049	Ccl5	BC033508
A_51_P136294	-0.502558	-1.59751	-0.351161	-1.44611	0.000165707	2.04e-09	0.000709276	7.18e-09	0.330447	Ms4a4b	NM_021718
A_51_P372550	-1.50328	-1.60187	-1.3245	-1.42308	4.02e-07	3.44e-08	5.47e-07	1.14e-07	0.32945	Cgref1	BC023116
A_51_P295085	0.496974	-1.6046	-0.720273	-2.82185	0.000158756	3.69e-09	6.58e-06	1.92e-10	0.328826	Ogn	NM_008760
A_51_P172502	-0.0672172	-1.60892	-0.217715	-1.75942	0.58746	1.85e-09	0.0155127	1.42e-09	0.327843	Cxcl12	NM_013655
A_52_P137086	-0.809215	-1.61439	0.581959	-0.223215	8.36e-05	6.81e-08	0.000578003	0.124707	0.326603	C330007P06Rik	AK021190
A_51_P416647	-0.231116	-1.61553	-2.53221	-3.91663	0.354881	3.26e-06	1.19e-07	2.21e-09	0.326344	Egfbp2	NM_010115
A_51_P458778	0.666563	-1.62396	-0.800657	-3.09118	0.000163707	1.72e-08	1.04e-05	1.91e-10	0.324444	Hpgd	NM_008278
A_51_P156955	-0.955727	-1.62765	-3.16928	-3.8412	0.000348767	1.34e-06	2.01e-08	1.19e-09	0.323615	Cfd	NM_013459
A_52_P92213	-0.752198	-1.6304	0.487371	-0.39083	1.73e-05	3.83e-09	0.000122468	0.00113333	0.322999	9030025P20Rik	AK089867
A_52_P454394	0.42225	-1.63249	-0.56458	-2.61932	0.002293	7.96e-09	8.12e-05	2.97e-10	0.322532	Arid3b	NM_019689
A_51_P486943	-0.330243	-1.63435	0.349656	-0.954448	0.00268854	1.31e-09	0.000582984	2.06e-07	0.322116	Ctdspl	NM_133710
A_51_P116245	0.551611	-1.63732	0.0698889	-2.11904	0.00211963	6.43e-08	0.657588	1.27e-08	0.321453	Styk1	NM_172891
A_52_P280658	0.202931	-1.63756	-1.2452	-3.08569	0.421028	1.12e-06	1.76e-05	9.32e-09	0.321399	NA	NAP102794-1
A_51_P436157	-0.936627	-1.6385	0.539795	-0.162073	0.00022791	3.81e-07	0.00358799	0.404015	0.321191	Sh3pxd2a	NM_008018
A_51_P335969	-1.646	-1.64158	-0.108905	-0.104491	3.63e-07	1.87e-08	0.381424	0.444006	0.320505	Des	NM_010043
A_52_P536407	-0.297082	-1.64287	-1.4965	-2.84228	0.453135	4.48e-05	0.000130452	8.73e-07	0.320219	Muc3	XM_355711
A_51_P226567	-0.585149	-1.64334	-1.26137	-2.31956	0.000553228	2.06e-08	4.28e-07	1.97e-09	0.320115	Hsd3b2	NM_153193
A_52_P297642	-0.917756	-1.64352	0.223863	-0.501897	1.72e-05	2.63e-08	0.0690165	0.00113574	0.320075	Pdia5	NM_028295
A_51_P157677	-0.534099	-1.64353	-0.372413	-1.48184	0.0515345	5.65e-06	0.110003	3.09e-05	0.320072	Pdlim3	NM_016798
A_51_P307650	-1.61583	-1.64393	-0.047804	-0.0759015	2.08e-07	7.54e-09	0.700502	0.546658	0.319984	Nmu	NM_019515
A_51_P358423	0.116353	-1.64962	-0.0692684	-1.83524	0.193297	4.96e-10	0.373709	2.97e-10	0.318723	Usp53	BC022221
A_51_P111192	-0.0818106	-1.65236	-1.07505	-2.6456	0.749848	2.5e-07	1.49e-05	8.28e-09	0.31812	Cyp2d10	NM_010005
A_51_P337269	-0.208486	-1.66199	-2.65124	-4.10474	0.184435	3.77e-08	7.59e-09	5.91e-11	0.316003	Aldob	NM_144903
A_52_P293222	-0.0858663	-1.66477	0.482066	-1.09684	0.779032	8.7e-07	0.0140926	6.93e-05	0.315394	Ppargc1b	AK042378
A_51_P136521	-0.278336	-1.66525	-0.654295	-2.04121	0.00841188	1.26e-09	4.63e-06	3.79e-10	0.31529	Lypd2	AK002226
A_51_P134468	-1.74276	-1.67501	1.77165	1.83939	1.31e-07	1.88e-08	4.44e-08	5.95e-09	0.313164	D17H6S56E-5	NM_033075
A_51_P443443	-1.4583	-1.67546	0.115013	-0.10215	2.88e-05	1.34e-06	0.613048	0.681033	0.313066	5830417I10Rik	AY040842
A_52_P3029	-0.0634364	-1.67634	-0.32999	-1.9429	0.671377	9.99e-08	0.00138854	2.67e-08	0.312875	Agpat4	NM_026644
A_51_P391432	-0.0352092	-1.68829	0.349399	-1.30368	0.930772	2.68e-06	0.110954	5.49e-05	0.310294	1810023F06Rik	NM_145449
A_51_P106591	-0.698001	-1.69036	-0.0474746	-1.03983	0.000203989	9.54e-08	0.766941	3.57e-06	0.30985	Tnrc4	NM_172434
A_52_P90363	0.372026	-1.69046	-1.1008	-3.16328	0.0571599	1.21e-06	5.11e-05	6.23e-09	0.309829	Ifi27	NM_029803
A_51_P346165	-0.0167831	-1.69072	-0.342015	-2.01596	0.929598	1.14e-07	0.00135141	2.59e-08	0.309771	Agpat4	NM_026644
A_51_P520966	-0.481591	-1.69248	0.831821	-0.379066	0.00302645	4.9e-08	4.49e-05	0.0134051	0.309395	Icosl	NM_015790
A_51_P292403	-0.699835	-1.70918	-0.244794	-1.25414	8.24e-06	6.96e-10	0.00495589	1.27e-08	0.305834	Sdc2	NM_008304
A_51_P104608	-0.381388	-1.72696	-0.670895	-2.01647	0.618524	0.00253889	0.213175	0.00185097	0.302087	Rnase6	NM_030098
A_51_P206203	-1.10356	-1.72925	-0.162978	-0.788667	1.6e-05	2.8e-07	0.260947	0.000146384	0.301609	Mrgprf	NM_145379
A_52_P481097	-0.743468	-1.73066	0.56714	-0.420048	0.000113627	6.84e-08	0.000519931	0.00312709	0.301315	Lztfl1	AK086528
A_51_P514449	-0.0607866	-1.73134	-1.1133	-2.78385	0.757501	1.09e-07	5.71e-06	1.91e-09	0.301171	Nr5a2	NM_030676
A_51_P120295	0.0096531	-1.73429	-0.345262	-2.08921	0.975679	1.36e-06	0.0732952	2.38e-07	0.300556	Cyp2d26	NM_029562
A_52_P645862	0.32505	-1.7353	-0.619658	-2.68001	0.0294283	1.98e-08	0.000153641	9.36e-10	0.300346	Agtr1a	NM_177322
A_51_P222773	-0.455078	-1.7395	1.4845	0.200078	0.00131715	4.64e-09	5.23e-08	0.0801405	0.299473	Foxa2	NM_010446
A_52_P441070	0.012724	-1.74886	-1.31782	-3.0794	0.965875	1.39e-07	2.6e-06	2.09e-09	0.297537	Apob	XM_137955
A_51_P365008	-0.77228	-1.75062	0.264483	-0.713857	1.67e-05	2.48e-09	0.0101532	9.69e-06	0.297174	Tns1	XM_911255
A_51_P420547	-0.206247	-1.75313	-1.00643	-2.55332	0.617761	1.89e-05	0.00185403	1.63e-06	0.296657	NA	NM_172621
A_52_P265584	-0.796289	-1.75998	0.0380507	-0.925636	4.09e-05	8.38e-09	0.784697	3.89e-06	0.295253	1810011O10Rik	AK003102
A_51_P358233	0.439361	-1.76021	-1.09645	-3.29602	0.00857906	3.16e-08	2.93e-06	3.42e-10	0.295206	Ifi27	AK010014
A_51_P308298	-0.81421	-1.76203	-0.219016	-1.16684	7.75e-05	3.83e-08	0.0499183	7.59e-07	0.294832	Myl9	BC055439
A_52_P549190	0.269347	-1.76558	-2.36693	-4.40186	0.617675	0.000160464	2.14e-05	1.41e-07	0.294109	Cldn8	NM_018778
A_51_P368313	-1.71118	-1.76751	0.082493	0.0261689	2.8e-06	1.29e-07	0.604864	0.897028	0.293716	Vip	NM_011702
A_52_P231729	0.274477	-1.77302	-0.557963	-2.60546	0.0300848	3.11e-07	0.000409274	3.84e-08	0.292595	H2-Q1	U96752
A_51_P253984	-1.4949	-1.78033	-0.130997	-0.416425	1.02e-06	1.71e-08	0.319292	0.0049012	0.291117	Pcp4	NM_008791
A_51_P313581	-0.513982	-1.7827	-1.13593	-2.40464	0.000364796	2.35e-09	2.29e-07	3.51e-10	0.290639	Fabp2	NM_007980
A_51_P407028	1.02655	-1.78679	-1.52185	-4.33519	1.64e-05	2.06e-08	1.92e-07	4.15e-11	0.289816	Car4	NM_007607
A_51_P284177	0.890761	-1.78884	-1.83465	-4.51425	3.83e-05	1.72e-08	4.67e-08	3.33e-11	0.289404	Akr1c14	NM_134072
A_51_P495780	-0.129527	-1.79237	-0.219036	-1.88188	0.476292	2.72e-08	0.10456	3.18e-08	0.288698	S3-12	NM_020568
A_52_P98531	-0.118215	-1.79536	-1.32394	-3.00108	0.453096	9.35e-09	2.71e-07	2.64e-10	0.2881	Nlrp6	BC031139
A_51_P208525	-2.63655	-1.79809	-0.963135	-0.124683	4.35e-09	1.74e-09	6.19e-07	0.244204	0.287554	Cr2	NM_007758
A_51_P428134	-0.392802	-1.8096	-0.790187	-2.20699	0.000285794	6.38e-10	2.87e-07	1.05e-10	0.285269	Lrig3	NM_177152
A_52_P148184	-1.00347	-1.81694	-0.245341	-1.05882	1.8e-06	1.27e-09	0.0117727	1.97e-07	0.283822	1600014C10Rik	NM_028166
A_51_P517215	-1.08798	-1.83482	0.577022	-0.16981	9.05e-06	1.42e-08	0.000291972	0.227071	0.280327	Grb14	NM_016719
A_51_P193993	0.737168	-1.83828	0.035197	-2.54025	0.0223156	7.61e-06	0.921968	9.99e-07	0.279656	Clic5	NM_172621
A_51_P259774	0.376024	-1.84312	-0.542895	-2.76204	0.00313792	1.69e-09	6.37e-05	1.34e-10	0.278718	Slc37a2	NM_020258
A_52_P579531	-0.464504	-1.84497	-0.258212	-1.63868	0.0275554	2.09e-07	0.146804	1.18e-06	0.27836	Pdlim3	NM_016798
A_51_P150705	0.0226372	-1.84818	-2.76006	-4.63087	0.963661	5.37e-05	3.34e-06	8.99e-08	0.277743	Igj	NM_152839
A_51_P178772	0.194384	-1.85218	-0.944885	-2.99145	0.298738	4.73e-08	2.14e-05	1.51e-09	0.276973	AU018778	NM_144930
A_52_P175679	-0.0172046	-1.85925	-0.743075	-2.58512	0.945031	5.35e-08	0.000225476	1.38e-08	0.27562	Oog4	NM_173773
A_52_P65524	-0.93432	-1.86199	0.420267	-0.507405	3.23e-05	1.54e-08	0.00332315	0.00157055	0.275096	NA	XM_136178
A_51_P356055	-1.83581	-1.87295	0.104751	0.0676123	8.59e-08	2.35e-09	0.334922	0.589572	0.273014	Grp	NM_175012
A_51_P373142	-0.518073	-1.87482	-0.789742	-2.14649	0.0250254	3.81e-07	0.000649211	2.42e-07	0.272662	AI854703	NM_177737
A_52_P418477	-1.41278	-1.87609	-0.368182	-0.831497	1.2e-07	6.13e-10	0.000472339	8.38e-07	0.272421	Tpm2	NM_009416
A_51_P404815	-0.468195	-1.88071	-0.29166	-1.70417	0.00132286	3.1e-09	0.0101001	1.11e-08	0.27155	Apol6	AK010208
A_51_P114941	0.719885	-1.89057	-0.70835	-3.31881	1.4e-05	6.91e-10	3.43e-06	2.71e-11	0.2697	Cyp3a13	NM_007819
A_52_P318361	-0.504202	-1.90977	-1.91512	-3.32069	0.244201	0.000151835	4.88e-05	1.11e-06	0.266135	Ces2	NM_145603
A_51_P395695	-1.44805	-1.91413	0.259196	-0.206875	0.000562849	3.55e-05	0.448168	0.541133	0.265333	Slc13a1	NM_019481
A_52_P536383	0.591006	-1.91544	-0.856783	-3.36323	0.00920084	2.1e-07	0.000240279	3.19e-09	0.265091	Gpbp1	NM_028487
A_51_P496253	-0.338918	-1.91661	-1.00433	-2.58202	0.103928	1.44e-07	4.88e-05	2.09e-08	0.264876	Slc6a4	NM_010484
A_52_P286360	-0.400791	-1.91831	-0.801888	-2.31941	0.0242803	1.83e-07	0.00023125	2.96e-08	0.264564	Otc	NM_008769
A_51_P150489	-0.875872	-1.93508	-1.86092	-2.92013	0.00172803	1e-06	1.11e-06	7.24e-08	0.261507	Mlze	NM_031378
A_51_P210510	-0.469458	-1.94651	0.37524	-1.10181	0.00348305	7.54e-09	0.00531043	1.81e-06	0.259443	Sparcl1	NM_010097
A_51_P191669	-0.416315	-1.94898	-3.00023	-4.53289	0.0226197	1.26e-07	1.95e-08	4.75e-10	0.258999	Chgb	NM_007694
A_51_P290191	-0.391364	-1.95086	-0.459473	-2.01897	0.0312616	3.83e-08	0.00534177	5.18e-08	0.258662	Mst1	NM_008243
A_51_P443902	-0.128702	-1.95205	-1.99012	-3.81346	0.829723	4.96e-05	5.88e-05	3.34e-07	0.258449	Klk1b16	NM_008454
A_52_P483336	-3.56947	-1.96527	-1.87515	-0.270947	1.61e-09	2.35e-09	2.01e-08	0.0251848	0.256092	Ms4a1	NM_007641
A_51_P328539	-0.0299706	-1.97076	-0.842567	-2.78336	0.829309	1.09e-09	5.85e-07	7.7e-11	0.255118	Eno3	NM_007933
A_52_P316474	0.183216	-2.00152	0.617574	-1.56717	0.150924	1.65e-09	4.35e-05	2.05e-08	0.249736	St3gal4	NM_009178
A_51_P227345	-0.908993	-2.01416	-0.578696	-1.68386	1.82e-05	2.17e-08	0.00012368	2.77e-08	0.247558	Dpep1	NM_007876
A_52_P372062	-0.215468	-2.01418	-0.919772	-2.71848	0.257662	3.06e-08	3.45e-05	4.26e-09	0.247555	Cyp2d13	NM_133695
A_52_P571419	-1.59288	-2.02702	-0.496318	-0.930465	4.6e-08	1.99e-10	2.66e-05	1.66e-07	0.245361	Igh-6	AJ294737
A_51_P107315	0.81843	-2.02763	-2.00971	-4.85577	0.00469765	7.91e-07	1.55e-06	9.54e-10	0.245258	Slc5a8	NM_145423
A_51_P495560	-0.120294	-2.03111	-1.17545	-3.08627	0.417554	2.35e-09	4.62e-07	1.63e-10	0.244667	Tgm3	NM_009374
A_52_P20391	-0.879483	-2.03841	0.0983009	-1.06063	9.91e-07	1.37e-10	0.189986	2.56e-08	0.243432	LOC545261	CB182661
A_51_P406165	-0.417189	-2.04635	-0.0507654	-1.67992	0.00158999	8.38e-10	0.656999	5.86e-09	0.242096	4432416J03Rik	NM_030069
A_52_P948080	-1.12683	-2.04757	-0.0214675	-0.942216	1.18e-07	9.77e-11	0.798049	3.66e-08	0.241891	2310068J10Rik	AK075917
A_52_P627269	-0.0794635	-2.06974	-2.22429	-4.21457	0.869187	3.44e-06	3.24e-06	4.48e-08	0.238202	BC015286	NM_198171
A_52_P501816	0.867203	-2.07795	-0.823123	-3.76827	0.024039	4.32e-05	0.02457	2.94e-07	0.236851	Slc6a14	NM_020049
A_52_P1053662	0.554561	-2.08665	-1.64857	-4.28978	0.00223578	9.78e-09	1.71e-07	6.52e-11	0.235427	NA	A_52_P1053662
A_52_P498798	-0.894478	-2.09098	-1.85235	-3.04886	0.000872695	3.08e-07	6.82e-07	1.14e-08	0.234721	9930109F21Rik	NM_183194
A_51_P462428	-0.00563409	-2.10591	0.256472	-1.8438	0.98964	2.8e-06	0.334374	6.87e-06	0.232305	Galntl2	NM_030166
A_51_P481721	1.00407	-2.10821	-1.77112	-4.88341	1.61e-05	3.85e-09	4.67e-08	3.88e-11	0.231934	Sult1d1	NM_016771
A_51_P480578	-0.494305	-2.11234	-0.317565	-1.9356	0.00365234	1.64e-07	0.0118784	7.12e-08	0.231271	Pcx	NM_008797
A_51_P232868	0.284319	-2.11763	0.687735	-1.71422	0.101737	1.43e-08	0.000230395	1.53e-07	0.230425	C230078M08Rik	NM_176995
A_52_P315976	-1.54368	-2.11949	-0.242815	-0.818628	2.02e-07	1.04e-09	0.00616121	1.12e-06	0.230128	Tpm2	NM_009416
A_52_P680827	0.54273	-2.12704	-2.08384	-4.75361	0.000176918	4.89e-10	4.4e-09	3.95e-12	0.228927	Abat	NM_172961
A_51_P423518	-1.47611	-2.13706	0.328405	-0.332544	6.43e-05	4.58e-07	0.147214	0.178631	0.227342	Amph	NM_175007
A_51_P151862	-1.28141	-2.13746	-0.462285	-1.31833	7.75e-07	8.38e-10	0.000321952	6.87e-08	0.22728	Lims2	NM_144862
A_51_P378545	-1.33127	-2.14025	0.356878	-0.4521	8.5e-05	2.6e-07	0.0911366	0.0502528	0.226841	Rbpms2	NM_028030
A_51_P378051	-0.0389215	-2.15414	0.588206	-1.52701	0.838298	1.48e-09	0.000103702	4.37e-08	0.224667	Aoc3	NM_009675
A_52_P486260	-0.944292	-2.17853	-0.665917	-1.90016	1.54e-05	7.2e-09	4.88e-05	2.36e-08	0.2209	Prelp	NM_054077
A_51_P226866	-0.437557	-2.2103	-1.39329	-3.16604	0.0231242	2.08e-08	1.79e-06	1.78e-09	0.216089	Slc13a2	NM_022411
A_52_P674808	-1.26002	-2.25506	-0.659572	-1.65461	0.000652694	1.09e-06	0.01542	3.46e-05	0.209487	Chrdl1	BC066832
A_52_P670812	-0.823854	-2.27287	-0.317999	-1.76702	1.19e-05	9.05e-10	0.00146764	3.32e-09	0.206918	0610007N19Rik	AK002304
A_51_P180091	0.358574	-2.27567	-0.474316	-3.10856	0.00151873	1.48e-10	5.44e-05	2.71e-11	0.206517	Cyp2s1	NM_028775
A_51_P358316	-0.398278	-2.28254	-1.14004	-3.0243	0.0133287	3.35e-09	1.83e-06	5.45e-10	0.205536	Chga	NM_007693
A_52_P64356	-0.879571	-2.29061	0.405538	-1.0055	3.64e-06	1.27e-09	0.000190111	1.44e-07	0.20439	Sparcl1	NM_010097
A_52_P175376	0.0552103	-2.29165	-0.629383	-2.97624	0.75688	9.05e-10	5.41e-05	1.92e-10	0.204242	Tcfcp2l1	AK086294
A_51_P185593	-2.21771	-2.32001	0.207185	0.104879	1.04e-08	1.99e-10	0.0261015	0.307097	0.200265	Dmn	NM_201639
A_51_P419319	-0.192211	-2.33023	-1.75313	-3.89116	0.685315	3.77e-06	5.83e-05	9.12e-08	0.198852	Aqp4	NM_009700
A_51_P334942	-0.617498	-2.37003	-0.768584	-2.52112	0.0135184	2.49e-07	0.000495075	2.33e-07	0.193442	Aldh1a1	NM_013467
A_51_P302566	-0.0130175	-2.44025	-1.36433	-3.79156	0.951937	2.35e-09	9.02e-07	2.87e-10	0.184252	Maob	NM_172778
A_52_P31381	0.361581	-2.46398	-3.85894	-6.6845	0.22289	2.69e-07	3.83e-08	4.36e-10	0.181246	Slc26a3	NM_021353
A_51_P335460	-0.242423	-2.46643	-2.18268	-4.40669	0.304483	2.95e-08	2.04e-07	4.38e-10	0.180938	Scin	NM_009132
A_51_P362818	-0.520713	-2.50762	-1.55172	-3.53863	0.00199587	1.17e-09	1.53e-07	1.47e-10	0.175845	Nlrp6	BC031139
A_51_P450527	-1.95911	-2.51645	-0.208437	-0.765779	1.5e-07	1.27e-09	0.0395574	1.03e-05	0.174772	Tagln	NM_011526
A_52_P210078	-1.90675	-2.51835	1.19455	0.582947	2.46e-06	2.29e-08	1.91e-05	0.00667176	0.174542	Acta2	NM_007392
A_51_P394115	-0.467065	-2.52747	-0.849019	-2.90942	0.00476367	1.29e-09	1.74e-05	6.54e-10	0.173443	Aadac	NM_023383
A_51_P428305	-0.41386	-2.64621	-2.06573	-4.29808	0.0178422	2.1e-09	4.99e-08	9.31e-11	0.15974	Insl5	NM_011831
A_51_P429567	-1.05012	-2.6613	0.17472	-1.43646	2.83e-06	1.94e-10	0.0944374	3.64e-08	0.158077	Lmod1	NM_053106
A_52_P185162	-0.450249	-2.69062	-2.4805	-4.72087	0.019649	5.41e-09	3.85e-08	2.66e-10	0.154897	Slc26a3	BC037066
A_51_P321341	0.295916	-2.72236	-1.73234	-4.75062	0.0917403	6.96e-09	2.14e-07	9.54e-11	0.151526	Sult1a1	NM_133670
A_51_P502599	-0.00527735	-2.79734	-2.04208	-4.83414	0.974317	1.77e-10	1.86e-08	1.34e-11	0.143853	Cyp2c40	NM_010004
A_51_P451052	-1.62226	-2.80004	0.159185	-1.01859	2.1e-07	1.77e-10	0.13592	8.66e-07	0.143583	Pgm5	NM_175013
A_51_P123039	-0.169012	-2.87023	-1.34501	-4.04623	0.348269	1.96e-08	1.34e-05	2.21e-09	0.136765	Klk4	NM_019928
A_51_P453909	-1.09159	-2.87712	-2.01616	-3.80168	0.0017866	5.7e-07	1.5e-05	4.67e-08	0.136114	Cyp2f2	NM_007817
A_51_P350817	-2.21924	-2.88545	-0.302817	-0.96902	9.88e-08	7.23e-10	0.00747233	2.26e-06	0.13533	Cnn1	NM_009922
A_52_P136348	-0.45538	-2.88901	-1.7709	-4.20453	0.0469731	1.13e-08	1.2e-06	8.4e-10	0.134996	BC055004	NM_001013773
A_51_P114722	-0.213477	-2.9753	-4.72994	-7.49176	0.61344	8.67e-07	4.87e-08	1.63e-09	0.127159	Hao3	NM_019545
A_51_P404875	-3.20269	-3.46486	0.737364	0.475196	2.41e-07	1.5e-08	0.00247012	0.0261479	0.0905675	Dmn	NM_201639
A_51_P406253	-0.446426	-3.56346	-2.88525	-6.00229	0.0550778	2.33e-09	4.52e-08	7.73e-11	0.0845847	Gcg	NM_008100
