# Supplementary material for: Dysregulation of miR-1-3p: An Early Event in Colitis-Associated Dysplasia
Source: Int J Mol Sci. 2022 Oct 27;23(21):13024. doi: 10.3390/ijms232113024 (PMC9657954; doi:10.3390/ijms232113024)
Supplement: Supplementary file 1 [file ijms-23-13024-s001.zip › Supplementary Data S3 - Fragoso et al - List_of_predicted_genes_DE_miRs.xlsx]

## Sheet: miR-31-5p
Ortholog of target gene	Representative transcript	Gene name	3P-seq tags + 5	Conserved sites total	Conserved 8mer sites	Conserved 7mer-m8 sites	Conserved 7mer-A1 sites	Poorly conserved sites total	Poorly conserved 8mer sites	Poorly conserved 7mer-m8 sites	Poorly conserved 7mer-A1 sites	6mer sites	Representative miRNA	Cumulative weighted context++ score	Total context++ score	Aggregate PCT	Previous TargetScan publication(s)
KDM2B	ENST00000536437.1	lysine (K)-specific demethylase 2B	647	1	1	0	0	0	0	0	0	0	mmu-miR-31-5p	-0.46	-0.46	ORF
DNAH10OS	ENST00000514254.2	dynein, axonemal, heavy chain 10 opposite strand	89	1	1	0	0	0	0	0	0	0	mmu-miR-31-5p	-0.4	-0.4	ORF
JMJD8	ENST00000412368.2	jumonji domain containing 8	164	1	1	0	0	0	0	0	0	0	mmu-miR-31-5p	-0.34	-0.39	ORF	2007
PLEKHA1	ENST00000538022.1	pleckstrin homology domain containing, family A (phosphoinositide binding specific) member 1	1172	1	1	0	0	0	0	0	0	0	mmu-miR-31-5p	-0.29	-0.29	ORF
TENM4	ENST00000278550.7	teneurin transmembrane protein 4	34	1	1	0	0	0	0	0	0	0	mmu-miR-31-5p	-0.24	-0.24	ORF	2009, 2011
CCDC42B	ENST00000335621.6	coiled-coil domain containing 42B	5	1	0	1	0	0	0	0	0	1	mmu-miR-31-5p	-0.28	-0.28	ORF
GPR137	ENST00000539851.1	G protein-coupled receptor 137	202	1	0	1	0	0	0	0	0	1	mmu-miR-31-5p	-0.24	-0.24	ORF
AP000350.4	ENST00000406213.1	Uncharacterized protein	5	1	0	1	0	0	0	0	0	1	mmu-miR-31-5p	-0.22	-0.22	ORF
PARPBP	ENST00000378128.3	PARP1 binding protein	456	1	0	0	1	0	0	0	0	1	mmu-miR-31-5p	-0.21	-0.21	ORF	2007
ARID2	ENST00000457135.1	AT rich interactive domain 2 (ARID, RFX-like)	891	1	0	0	1	0	0	0	0	0	mmu-miR-31-5p	-0.2	-0.2	ORF
PAPOLA	ENST00000557471.1	poly(A) polymerase alpha	1229	1	0	0	1	0	0	0	0	0	mmu-miR-31-5p	0	-0.17	ORF
CNTD1	ENST00000588408.1	cyclin N-terminal domain containing 1	7	1	0	1	0	0	0	0	0	0	mmu-miR-31-5p	0	-0.21	ORF
SPNS2	ENST00000329078.3	spinster homolog 2 (Drosophila)	7	1	0	1	0	0	0	0	0	0	mmu-miR-31-5p	0	-0.18	ORF
SLC46A1	ENST00000440501.1	solute carrier family 46 (folate transporter), member 1	580	1	1	0	0	1	0	1	0	2	mmu-miR-31-5p	-0.38	-0.43	< 0.1
CYB561D1	ENST00000496961.1	cytochrome b561 family, member D1	105	1	0	0	1	1	0	1	0	3	mmu-miR-31-5p	-0.48	-0.48	< 0.1
EVC	ENST00000382674.2	Ellis van Creveld syndrome	165	1	0	1	0	1	0	0	1	0	mmu-miR-31-5p	-0.45	-0.45	< 0.1
SNX22	ENST00000325881.4	sorting nexin 22	5	2	0	1	1	0	0	0	0	1	mmu-miR-31-5p	-0.29	-0.29	< 0.1	2007
FMNL3	ENST00000335154.5	formin-like 3	132	1	0	1	0	1	0	0	1	5	mmu-miR-31-5p	-0.06	-0.24	< 0.1
PHKG2	ENST00000563588.1	phosphorylase kinase, gamma 2 (testis)	283	1	0	1	0	2	0	1	1	0	mmu-miR-31-5p	-0.01	-0.2	< 0.1
STK40	ENST00000359297.2	serine/threonine kinase 40	214	2	2	0	0	1	1	0	0	0	mmu-miR-31-5p	-0.39	-0.44	0.82	2007, 2009, 2011
BAP1	ENST00000460680.1	BRCA1 associated protein-1 (ubiquitin carboxy-terminal hydrolase)	445	2	1	1	0	0	0	0	0	0	mmu-miR-31-5p	-0.51	-0.53	0.71	2011
SATB2	ENST00000417098.1	SATB homeobox 2	820	2	1	1	0	0	0	0	0	0	mmu-miR-31-5p	-0.34	-0.38	0.71	2007, 2009, 2011
AK4	ENST00000545314.1	adenylate kinase 4	116	2	1	1	0	0	0	0	0	1	mmu-miR-31-5p	-0.52	-0.52	0.7	2011
NUFIP2	ENST00000225388.4	nuclear fragile X mental retardation protein interacting protein 2	440	2	1	0	1	0	0	0	0	1	mmu-miR-31-5p	-0.31	-0.46	0.67	2007, 2009, 2011
HIF1AN	ENST00000299163.6	hypoxia inducible factor 1, alpha subunit inhibitor	1545	1	1	0	0	2	0	1	1	1	mmu-miR-31-5p	-0.61	-0.71	0.65	2007, 2009, 2011
AHCYL1	ENST00000369799.5	adenosylhomocysteinase-like 1	1279	1	1	0	0	3	0	0	3	0	mmu-miR-31-5p	-0.88	-0.88	0.63	2009, 2011
SYDE2	ENST00000341460.5	synapse defective 1, Rho GTPase, homolog 2 (C. elegans)	72	1	1	0	0	1	0	0	1	0	mmu-miR-31-5p	-0.38	-0.41	0.63	2009, 2011
RSBN1	ENST00000261441.5	round spermatid basic protein 1	54	2	1	1	0	1	0	0	1	0	mmu-miR-31-5p	-0.63	-0.63	0.62	2007, 2009, 2011
MBOAT2	ENST00000305997.3	membrane bound O-acyltransferase domain containing 2	1145	2	0	2	0	1	0	1	0	1	mmu-miR-31-5p	-0.38	-0.57	0.61	2007, 2009, 2011
POU2F1	ENST00000367866.2	POU class 2 homeobox 1	83	2	2	0	0	1	0	0	1	2	mmu-miR-31-5p	-0.17	-0.17	0.59	2011
RASA1	ENST00000456692.2	RAS p21 protein activator (GTPase activating protein) 1	1700	1	1	0	0	0	0	0	0	0	mmu-miR-31-5p	-0.44	-0.44	0.59	2007, 2009, 2011
SLC6A6	ENST00000454876.2	solute carrier family 6 (neurotransmitter transporter), member 6	280	1	1	0	0	0	0	0	0	2	mmu-miR-31-5p	-0.22	-0.22	0.59	2007, 2009, 2011
EIF5	ENST00000216554.3	eukaryotic translation initiation factor 5	970	1	1	0	0	0	0	0	0	0	mmu-miR-31-5p	-0.21	-0.48	0.59	2007, 2009, 2011
TNS1	ENST00000171887.4	tensin 1	591	1	1	0	0	1	0	0	1	0	mmu-miR-31-5p	-0.2	-0.2	0.59	2009, 2011
PPP1R9A	ENST00000289495.5	protein phosphatase 1, regulatory subunit 9A	46	1	1	0	0	0	0	0	0	1	mmu-miR-31-5p	-0.16	-0.34	0.59	2007, 2009, 2011
ZC3H12C	ENST00000278590.3	zinc finger CCCH-type containing 12C	150	1	1	0	0	0	0	0	0	1	mmu-miR-31-5p	-0.15	-0.17	0.59	2009, 2011
AGO3	ENST00000373191.4	argonaute RISC catalytic component 3	198	1	1	0	0	0	0	0	0	2	mmu-miR-31-5p	-0.14	-0.53	0.59
NAA50	ENST00000240922.3	N(alpha)-acetyltransferase 50, NatE catalytic subunit	260	1	1	0	0	0	0	0	0	0	mmu-miR-31-5p	-0.02	-0.32	0.59	2009, 2011
AHSA2	ENST00000394457.3	AHA1, activator of heat shock 90kDa protein ATPase homolog 2 (yeast)	820	1	1	0	0	0	0	0	0	0	mmu-miR-31-5p	0	-0.5	0.59
IL34	ENST00000429149.2	interleukin 34	5	1	1	0	0	0	0	0	0	0	mmu-miR-31-5p	-0.65	-0.65	0.58	2007, 2009, 2011
KANK1	ENST00000382303.1	KN motif and ankyrin repeat domains 1	6	1	1	0	0	0	0	0	0	1	mmu-miR-31-5p	-0.54	-0.54	0.58	2007, 2009, 2011
GXYLT1	ENST00000398675.3	glucoside xylosyltransferase 1	126	1	1	0	0	0	0	0	0	0	mmu-miR-31-5p	-0.48	-0.48	0.58	2009, 2011
HIAT1	ENST00000370152.3	hippocampus abundant transcript 1	1473	1	1	0	0	0	0	0	0	0	mmu-miR-31-5p	-0.47	-0.47	0.58	2007, 2009, 2011
NUMB	ENST00000554546.1	numb homolog (Drosophila)	2707	1	1	0	0	0	0	0	0	0	mmu-miR-31-5p	-0.44	-0.45	0.58	2007, 2009, 2011
SLC43A2	ENST00000301335.5	solute carrier family 43 (amino acid system L transporter), member 2	68	1	1	0	0	0	0	0	0	2	mmu-miR-31-5p	-0.36	-0.4	0.58	2007, 2009, 2011
RBM48	ENST00000481551.1	RNA binding motif protein 48	220	1	1	0	0	2	0	0	2	0	mmu-miR-31-5p	-0.16	-0.68	0.58
SF3B3	ENST00000302516.5	splicing factor 3b, subunit 3, 130kDa	2541	1	1	0	0	2	0	0	2	0	mmu-miR-31-5p	-0.1	-0.28	0.58	2011
VGLL3	ENST00000398399.2	vestigial like 3 (Drosophila)	187	1	1	0	0	0	0	0	0	3	mmu-miR-31-5p	-0.09	-0.51	0.58	2009, 2011
WDR5	ENST00000425041.1	WD repeat domain 5	889	1	1	0	0	1	0	0	1	0	mmu-miR-31-5p	-0.71	-0.77	0.57	2009, 2011
DUSP7	ENST00000495880.1	dual specificity phosphatase 7	68	1	1	0	0	1	0	0	1	1	mmu-miR-31-5p	-0.41	-0.58	0.57	2011
BACH2	ENST00000257749.4	BTB and CNC homology 1, basic leucine zipper transcription factor 2	74	1	1	0	0	2	1	1	0	1	mmu-miR-31-5p	-0.33	-0.35	0.57	2007, 2009, 2011
CHD7	ENST00000423902.2	chromodomain helicase DNA binding protein 7	925	1	1	0	0	0	0	0	0	0	mmu-miR-31-5p	-0.15	-0.15	0.57
MAP3K1	ENST00000399503.3	mitogen-activated protein kinase kinase kinase 1, E3 ubiquitin protein ligase	137	1	1	0	0	0	0	0	0	0	mmu-miR-31-5p	-0.12	-0.12	0.57	2009, 2011
DACH1	ENST00000305425.4	dachshund homolog 1 (Drosophila)	18	1	1	0	0	0	0	0	0	0	mmu-miR-31-5p	-0.08	-0.29	0.57
FUBP1	ENST00000370767.1	far upstream element (FUSE) binding protein 1	2021	1	1	0	0	0	0	0	0	0	mmu-miR-31-5p	-0.07	-0.18	0.57
RREB1	ENST00000379938.2	ras responsive element binding protein 1	340	1	1	0	0	0	0	0	0	1	mmu-miR-31-5p	-0.37	-0.37	0.56	2011
TAF4	ENST00000252996.4	TAF4 RNA polymerase II, TATA box binding protein (TBP)-associated factor, 135kDa	61	1	1	0	0	0	0	0	0	0	mmu-miR-31-5p	-0.3	-0.3	0.56	2009, 2011
CCNT1	ENST00000261900.3	cyclin T1	86	1	1	0	0	1	0	0	1	0	mmu-miR-31-5p	-0.22	-0.26	0.56
ZNF574	ENST00000600245.1	zinc finger protein 574	1871	1	1	0	0	0	0	0	0	0	mmu-miR-31-5p	0	-0.26	0.56
E2F2	ENST00000361729.2	E2F transcription factor 2	96	1	1	0	0	0	0	0	0	1	mmu-miR-31-5p	-0.45	-0.45	0.55	2009, 2011
RHOBTB1	ENST00000337910.5	Rho-related BTB domain containing 1	229	1	1	0	0	0	0	0	0	0	mmu-miR-31-5p	-0.21	-0.3	0.55	2007, 2009, 2011
ARID1A	ENST00000324856.7	AT rich interactive domain 1A (SWI-like)	31	1	1	0	0	0	0	0	0	0	mmu-miR-31-5p	-0.16	-0.25	0.55	2007, 2009, 2011
NDRG3	ENST00000373803.2	NDRG family member 3	960	1	1	0	0	0	0	0	0	0	mmu-miR-31-5p	-0.49	-0.5	0.54	2007, 2009, 2011
MAP4K5	ENST00000013125.4	mitogen-activated protein kinase kinase kinase kinase 5	634	1	1	0	0	0	0	0	0	0	mmu-miR-31-5p	-0.42	-0.42	0.54	2007, 2009, 2011
CHD6	ENST00000373233.3	chromodomain helicase DNA binding protein 6	85	1	1	0	0	0	0	0	0	0	mmu-miR-31-5p	-0.06	-0.06	0.54	2009, 2011
TMED10	ENST00000303575.4	transmembrane emp24-like trafficking protein 10 (yeast)	1753	1	1	0	0	0	0	0	0	0	mmu-miR-31-5p	-0.48	-0.48	0.53	2007, 2009, 2011
RGAG1	ENST00000465301.2	retrotransposon gag domain containing 1	5	1	1	0	0	1	0	0	1	1	mmu-miR-31-5p	-0.42	-0.42	0.53	2007, 2009, 2011
TESK2	ENST00000372084.1	testis-specific kinase 2	11	1	1	0	0	0	0	0	0	0	mmu-miR-31-5p	-0.31	-0.31	0.53	2007, 2009, 2011
SERTAD2	ENST00000313349.3	SERTA domain containing 2	119	1	1	0	0	0	0	0	0	1	mmu-miR-31-5p	-0.38	-0.45	0.52	2007, 2009, 2011
LATS2	ENST00000382592.4	large tumor suppressor kinase 2	464	1	1	0	0	0	0	0	0	0	mmu-miR-31-5p	-0.38	-0.38	0.52	2007, 2009, 2011
GCNT4	ENST00000322348.4	glucosaminyl (N-acetyl) transferase 4, core 2	19	2	1	0	1	1	0	1	0	1	mmu-miR-31-5p	-0.32	-0.56	0.52
NR5A2	ENST00000367362.3	nuclear receptor subfamily 5, group A, member 2	121	1	1	0	0	0	0	0	0	1	mmu-miR-31-5p	-0.29	-0.39	0.52	2007, 2009, 2011
JAZF1	ENST00000283928.5	JAZF zinc finger 1	869	1	1	0	0	1	0	1	0	0	mmu-miR-31-5p	-0.23	-0.68	0.52	2007, 2009, 2011
PC	ENST00000529047.1	pyruvate carboxylase	798	1	1	0	0	0	0	0	0	1	mmu-miR-31-5p	-0.08	-0.69	0.52	2007, 2009, 2011
TMEM145	ENST00000301204.3	transmembrane protein 145	5	1	1	0	0	0	0	0	0	0	mmu-miR-31-5p	-0.69	-0.69	0.51	2007, 2009, 2011
ATP8A1	ENST00000381668.5	ATPase, aminophospholipid transporter (APLT), class I, type 8A, member 1	48	1	1	0	0	1	0	1	0	0	mmu-miR-31-5p	-0.3	-0.3	0.51	2009, 2011
SLC45A4	ENST00000519067.1	solute carrier family 45, member 4	418	1	1	0	0	0	0	0	0	1	mmu-miR-31-5p	-0.03	-0.06	0.51
SUPT16H	ENST00000216297.2	suppressor of Ty 16 homolog (S. cerevisiae)	528	1	1	0	0	1	0	1	0	0	mmu-miR-31-5p	-0.41	-0.42	0.5	2009, 2011
ADCY6	ENST00000357869.3	adenylate cyclase 6	6	1	1	0	0	0	0	0	0	3	mmu-miR-31-5p	-0.25	-0.25	0.5	2009, 2011
SCG3	ENST00000220478.3	secretogranin III	15	1	1	0	0	1	1	0	0	0	mmu-miR-31-5p	-0.24	-0.85	0.5	2009, 2011
RAB19	ENST00000275874.5	RAB19, member RAS oncogene family	7	1	1	0	0	0	0	0	0	1	mmu-miR-31-5p	-0.13	-0.65	0.5
OSBP2	ENST00000382310.3	oxysterol binding protein 2	485	1	1	0	0	1	1	0	0	0	mmu-miR-31-5p	-0.42	-0.43	0.49	2007, 2009, 2011
AKAP1	ENST00000337714.3	A kinase (PRKA) anchor protein 1	843	1	1	0	0	0	0	0	0	0	mmu-miR-31-5p	-0.47	-0.48	0.48	2011
ATXN3	ENST00000545170.1	ataxin 3	115	1	1	0	0	0	0	0	0	0	mmu-miR-31-5p	-0.37	-0.37	0.48	2009, 2011
KLF13	ENST00000307145.3	Kruppel-like factor 13	5	1	1	0	0	1	0	1	0	1	mmu-miR-31-5p	-0.31	-0.31	0.48	2007, 2009, 2011
GLUL	ENST00000331872.6	glutamate-ammonia ligase	1073	1	1	0	0	1	0	0	1	0	mmu-miR-31-5p	-0.01	-0.6	0.48	2011
SGMS1	ENST00000361781.2	sphingomyelin synthase 1	100	2	0	1	1	0	0	0	0	0	mmu-miR-31-5p	-0.41	-0.41	0.47	2007, 2009
PPP2R2A	ENST00000380737.3	protein phosphatase 2, regulatory subunit B, alpha	236	1	0	1	0	1	0	0	1	1	mmu-miR-31-5p	-0.4	-0.4	0.47	2007, 2009, 2011
PEX5	ENST00000266563.5	peroxisomal biogenesis factor 5	2114	1	1	0	0	0	0	0	0	1	mmu-miR-31-5p	-0.41	-0.41	0.46	2007, 2009, 2011
CLOCK	ENST00000309964.4	clock circadian regulator	86	1	0	1	0	1	0	0	1	0	mmu-miR-31-5p	-0.31	-0.31	0.46
FZD3	ENST00000240093.3	frizzled family receptor 3	192	1	1	0	0	1	1	0	0	0	mmu-miR-31-5p	-0.36	-0.4	0.45	2007, 2009, 2011
CLASP2	ENST00000539981.1	cytoplasmic linker associated protein 2	554	1	1	0	0	0	0	0	0	0	mmu-miR-31-5p	-0.22	-0.22	0.45	2007, 2009, 2011
SH3BGRL2	ENST00000369838.4	SH3 domain binding glutamic acid-rich protein like 2	32	1	1	0	0	1	0	0	1	0	mmu-miR-31-5p	-0.18	-0.53	0.45	2009, 2011
SNTB2	ENST00000336278.4	syntrophin, beta 2 (dystrophin-associated protein A1, 59kDa, basic component 2)	254	1	1	0	0	0	0	0	0	1	mmu-miR-31-5p	-0.12	-0.32	0.45	2011
TMPRSS11F	ENST00000356291.2	transmembrane protease, serine 11F	5	1	1	0	0	1	0	0	1	0	mmu-miR-31-5p	-0.77	-0.77	0.44	2009, 2011
CHMP7	ENST00000313219.7	charged multivesicular body protein 7	124	1	1	0	0	0	0	0	0	0	mmu-miR-31-5p	-0.35	-0.44	0.44	2007, 2009, 2011
PAFAH1B2	ENST00000527958.1	platelet-activating factor acetylhydrolase 1b, catalytic subunit 2 (30kDa)	180	1	1	0	0	1	0	0	1	0	mmu-miR-31-5p	-0.05	-0.5	0.44	2011
CDK1	ENST00000395284.3	cyclin-dependent kinase 1	3029	1	1	0	0	0	0	0	0	0	mmu-miR-31-5p	0	-0.54	0.44
KIAA0355	ENST00000299505.6	KIAA0355	538	1	1	0	0	0	0	0	0	0	mmu-miR-31-5p	-0.07	-0.11	0.43	2009, 2011
ZDHHC18	ENST00000374142.4	zinc finger, DHHC-type containing 18	268	1	1	0	0	0	0	0	0	1	mmu-miR-31-5p	-0.03	-0.58	0.43	2007, 2009, 2011
ISL1	ENST00000230658.7	ISL LIM homeobox 1	67	2	0	0	2	0	0	0	0	0	mmu-miR-31-5p	-0.42	-0.42	0.42	2007, 2009, 2011
LPP	ENST00000312675.4	LIM domain containing preferred translocation partner in lipoma	1894	1	0	0	1	4	1	1	2	1	mmu-miR-31-5p	-0.33	-0.33	0.42	2011
DDI2	ENST00000480945.1	DNA-damage inducible 1 homolog 2 (S. cerevisiae)	357	1	0	0	1	1	0	0	1	1	mmu-miR-31-5p	-0.01	-0.29	0.42
B3GNT2	ENST00000301998.4	UDP-GlcNAc:betaGal beta-1,3-N-acetylglucosaminyltransferase 2	1860	1	1	0	0	0	0	0	0	0	mmu-miR-31-5p	-0.52	-0.52	0.41	2009, 2011
PAX5	ENST00000358127.4	paired box 5	5	1	1	0	0	1	1	0	0	1	mmu-miR-31-5p	-0.24	-0.24	0.41	2009, 2011
RHBDL3	ENST00000269051.4	rhomboid, veinlet-like 3 (Drosophila)	100	1	0	1	0	3	0	2	1	1	mmu-miR-31-5p	-0.06	-0.56	0.41	2007, 2009, 2011
SH3BP1	ENST00000357436.4	SH3-domain binding protein 1	2333	1	1	0	0	0	0	0	0	1	mmu-miR-31-5p	-0.66	-0.66	0.4	2007, 2009, 2011
SHISA6	ENST00000441885.3	shisa family member 6	5	1	0	1	0	3	1	1	1	1	mmu-miR-31-5p	-0.51	-0.51	0.4
IQSEC2	ENST00000375365.2	IQ motif and Sec7 domain 2	5	1	0	1	0	1	0	0	1	4	mmu-miR-31-5p	-0.01	-0.23	0.4	2007, 2009, 2011
ANKRD52	ENST00000267116.7	ankyrin repeat domain 52	2913	1	1	0	0	2	0	1	1	1	mmu-miR-31-5p	-0.31	-0.31	0.39	2009, 2011
MMP16	ENST00000286614.6	matrix metallopeptidase 16 (membrane-inserted)	12	1	1	0	0	1	0	0	1	2	mmu-miR-31-5p	-0.27	-0.3	0.38	2007
CLSTN2	ENST00000458420.3	calsyntenin 2	119	1	1	0	0	2	0	0	2	3	mmu-miR-31-5p	-0.17	-0.2	0.38
SEMA6D	ENST00000355997.3	sema domain, transmembrane domain (TM), and cytoplasmic domain, (semaphorin) 6D	179	1	0	0	1	2	0	0	2	2	mmu-miR-31-5p	-0.53	-0.56	0.38	2007, 2011
COL5A1	ENST00000371817.3	collagen, type V, alpha 1	3111	1	1	0	0	1	1	0	0	0	mmu-miR-31-5p	-0.23	-0.32	0.36	2009, 2011
FAM122A	ENST00000394264.3	family with sequence similarity 122A	1277	2	1	0	1	0	0	0	0	3	mmu-miR-31-5p	-0.08	-0.57	0.36	2007, 2009, 2011
YLPM1	ENST00000552421.1	YLP motif containing 1	1542	1	1	0	0	0	0	0	0	0	mmu-miR-31-5p	0	-0.08	0.36	2009, 2011
SLC1A2	ENST00000278379.3	solute carrier family 1 (glial high affinity glutamate transporter), member 2	5	2	2	0	0	1	0	1	0	2	mmu-miR-31-5p	-0.33	-0.33	0.35	2007, 2009, 2011
DUSP1	ENST00000239223.3	dual specificity phosphatase 1	37211	1	1	0	0	1	0	0	1	1	mmu-miR-31-5p	-0.3	-0.57	0.35
PIK3C2A	ENST00000265970.7	phosphatidylinositol-4-phosphate 3-kinase, catalytic subunit type 2 alpha	280	1	0	1	0	1	1	0	0	0	mmu-miR-31-5p	-0.41	-0.56	0.35	2009, 2011
RAB9B	ENST00000243298.2	RAB9B, member RAS oncogene family	21	1	1	0	0	1	0	1	0	0	mmu-miR-31-5p	-0.52	-0.52	0.34	2011
KCTD21	ENST00000340067.3	potassium channel tetramerization domain containing 21	90	1	1	0	0	0	0	0	0	0	mmu-miR-31-5p	-0.44	-0.44	0.34	2007, 2009, 2011
STX12	ENST00000373943.4	syntaxin 12	1082	1	1	0	0	0	0	0	0	0	mmu-miR-31-5p	-0.37	-0.37	0.34	2007, 2009, 2011
SPRED1	ENST00000299084.4	sprouty-related, EVH1 domain containing 1	547	1	0	1	0	1	0	1	0	0	mmu-miR-31-5p	-0.36	-0.36	0.34	2007, 2011
KHDRBS3	ENST00000355849.5	KH domain containing, RNA binding, signal transduction associated 3	11	1	1	0	0	0	0	0	0	0	mmu-miR-31-5p	-0.55	-0.6	0.33	2007, 2009, 2011
XKR6	ENST00000304437.2	XK, Kell blood group complex subunit-related family, member 6	5	1	1	0	0	0	0	0	0	0	mmu-miR-31-5p	-0.27	-0.27	0.33	2007, 2009, 2011
ZBTB20	ENST00000462705.1	zinc finger and BTB domain containing 20	5	1	0	0	1	4	0	4	0	2	mmu-miR-31-5p	0	-0.38	0.33
SH2D1A	ENST00000371139.4	SH2 domain containing 1A	5	1	1	0	0	1	0	1	0	0	mmu-miR-31-5p	-0.89	-0.89	0.32	2011
WNK1	ENST00000315939.6	WNK lysine deficient protein kinase 1	950	1	1	0	0	0	0	0	0	0	mmu-miR-31-5p	-0.31	-0.31	0.32	2009, 2011
DPY19L3	ENST00000586987.1	dpy-19-like 3 (C. elegans)	146	1	1	0	0	0	0	0	0	0	mmu-miR-31-5p	-0.2	-0.26	0.32	2009, 2011
FNDC5	ENST00000496770.1	fibronectin type III domain containing 5	5	1	1	0	0	0	0	0	0	1	mmu-miR-31-5p	-0.12	-0.52	0.32	2007, 2009, 2011
BAHD1	ENST00000416165.1	bromo adjacent homology domain containing 1	76	1	0	1	0	3	0	1	2	0	mmu-miR-31-5p	-0.39	-0.39	0.32	2007, 2009, 2011
STRIP2	ENST00000249344.2	striatin interacting protein 2	87	1	0	1	0	1	0	1	0	1	mmu-miR-31-5p	-0.36	-0.44	0.32	2011
PPP6C	ENST00000373547.4	protein phosphatase 6, catalytic subunit	346	1	0	1	0	0	0	0	0	1	mmu-miR-31-5p	-0.33	-0.38	0.32	2007, 2009, 2011
TACC1	ENST00000330691.6	transforming, acidic coiled-coil containing protein 1	186	1	0	1	0	0	0	0	0	0	mmu-miR-31-5p	-0.32	-0.32	0.32	2007, 2009, 2011
DPYSL5	ENST00000288699.6	dihydropyrimidinase-like 5	315	1	0	1	0	1	0	0	1	1	mmu-miR-31-5p	-0.32	-0.39	0.32	2011
COPS2	ENST00000388901.5	COP9 signalosome subunit 2	11120	1	0	1	0	0	0	0	0	0	mmu-miR-31-5p	-0.3	-0.3	0.32	2009, 2011
ZNF280C	ENST00000370978.4	zinc finger protein 280C	138	1	0	1	0	0	0	0	0	1	mmu-miR-31-5p	-0.29	-0.29	0.32	2009, 2011
ZSWIM6	ENST00000252744.5	zinc finger, SWIM-type containing 6	933	1	0	1	0	0	0	0	0	0	mmu-miR-31-5p	-0.28	-0.29	0.32	2011
UBE2K	ENST00000261427.5	ubiquitin-conjugating enzyme E2K	762	1	0	1	0	0	0	0	0	0	mmu-miR-31-5p	-0.27	-0.27	0.32	2007, 2009, 2011
CAMK2D	ENST00000296402.5	calcium/calmodulin-dependent protein kinase II delta	938	1	0	1	0	0	0	0	0	0	mmu-miR-31-5p	-0.24	-0.24	0.32	2007, 2009, 2011
SYT6	ENST00000607941.1	synaptotagmin VI	5	1	0	1	0	0	0	0	0	0	mmu-miR-31-5p	-0.22	-0.22	0.32	2009, 2011
SELT	ENST00000471696.1	Selenoprotein T	538	1	0	1	0	0	0	0	0	0	mmu-miR-31-5p	-0.22	-0.22	0.32	2009, 2011
EBF3	ENST00000368648.3	early B-cell factor 3	101	1	0	1	0	0	0	0	0	0	mmu-miR-31-5p	-0.21	-0.21	0.32	2007, 2009, 2011
VAPB	ENST00000395802.3	VAMP (vesicle-associated membrane protein)-associated protein B and C	391	1	0	1	0	0	0	0	0	1	mmu-miR-31-5p	-0.21	-0.22	0.32	2007, 2009, 2011
YWHAE	ENST00000264335.8	tyrosine 3-monooxygenase/tryptophan 5-monooxygenase activation protein, epsilon polypeptide	144	1	0	1	0	0	0	0	0	0	mmu-miR-31-5p	-0.2	-0.22	0.32	2007, 2009, 2011
IDE	ENST00000265986.6	insulin-degrading enzyme	446	1	0	1	0	0	0	0	0	0	mmu-miR-31-5p	-0.19	-0.26	0.32	2011
TM9SF3	ENST00000371142.4	transmembrane 9 superfamily member 3	1030	1	0	1	0	0	0	0	0	0	mmu-miR-31-5p	-0.18	-0.23	0.32	2007, 2009, 2011
KIAA1024	ENST00000305428.3	KIAA1024	5	1	0	1	0	0	0	0	0	2	mmu-miR-31-5p	-0.18	-0.18	0.32	2007, 2009, 2011
CTNND2	ENST00000304623.8	catenin (cadherin-associated protein), delta 2	25	1	0	1	0	0	0	0	0	0	mmu-miR-31-5p	-0.17	-0.17	0.32	2007, 2009, 2011
CACNB2	ENST00000396576.2	calcium channel, voltage-dependent, beta 2 subunit	52	1	0	1	0	1	0	1	0	0	mmu-miR-31-5p	-0.17	-0.3	0.32	2007, 2009, 2011
TACC2	ENST00000513429.1	transforming, acidic coiled-coil containing protein 2	225	1	0	1	0	0	0	0	0	0	mmu-miR-31-5p	-0.16	-0.21	0.32	2007, 2009, 2011
CSMD1	ENST00000400186.3	CUB and Sushi multiple domains 1	5	1	0	1	0	1	0	1	0	0	mmu-miR-31-5p	-0.16	-0.32	0.32	2009, 2011
CLCN3	ENST00000513761.1	chloride channel, voltage-sensitive 3	1142	1	0	1	0	0	0	0	0	0	mmu-miR-31-5p	-0.14	-0.14	0.32	2007
SEPHS1	ENST00000545675.1	selenophosphate synthetase 1	281	1	0	1	0	0	0	0	0	1	mmu-miR-31-5p	-0.14	-0.18	0.32	2007, 2009, 2011
EML5	ENST00000554922.1	echinoderm microtubule associated protein like 5	60	1	0	1	0	0	0	0	0	1	mmu-miR-31-5p	-0.14	-0.21	0.32
KCNN3	ENST00000271915.4	potassium intermediate/small conductance calcium-activated channel, subfamily N, member 3	5	1	0	1	0	0	0	0	0	0	mmu-miR-31-5p	-0.14	-0.14	0.32	2011
UBN1	ENST00000262376.6	ubinuclein 1	586	1	0	1	0	0	0	0	0	0	mmu-miR-31-5p	-0.11	-0.11	0.32	2007, 2009, 2011
APBB2	ENST00000295974.8	amyloid beta (A4) precursor protein-binding, family B, member 2	704	1	0	1	0	0	0	0	0	0	mmu-miR-31-5p	-0.11	-0.11	0.32	2007, 2009
PLXNA2	ENST00000367033.3	plexin A2	8	1	0	1	0	1	0	1	0	0	mmu-miR-31-5p	-0.08	-0.08	0.32	2007, 2009, 2011
EHD1	ENST00000320631.3	EH-domain containing 1	335	1	0	1	0	2	0	1	1	2	mmu-miR-31-5p	-0.07	-0.38	0.32	2009, 2011
STAU2	ENST00000522695.1	staufen double-stranded RNA binding protein 2	306	1	0	1	0	0	0	0	0	1	mmu-miR-31-5p	-0.07	-0.08	0.32	2009
PLXNA4	ENST00000321063.4	plexin A4	9	1	0	1	0	0	0	0	0	1	mmu-miR-31-5p	-0.07	-0.12	0.32	2009, 2011
SRCAP	ENST00000262518.4	Snf2-related CREBBP activator protein	643	1	0	1	0	1	0	0	1	4	mmu-miR-31-5p	-0.07	-0.17	0.32
SFXN1	ENST00000321442.5	sideroflexin 1	1018	1	0	1	0	0	0	0	0	1	mmu-miR-31-5p	-0.05	-0.16	0.32
HERPUD2	ENST00000396081.1	HERPUD family member 2	30	1	0	1	0	0	0	0	0	0	mmu-miR-31-5p	-0.04	-0.18	0.32	2007, 2011
RAB6B	ENST00000285208.4	RAB6B, member RAS oncogene family	669	1	0	1	0	2	0	1	1	1	mmu-miR-31-5p	-0.03	-0.47	0.32	2007, 2009, 2011
VAV3	ENST00000370056.4	vav 3 guanine nucleotide exchange factor	1128	1	0	1	0	0	0	0	0	0	mmu-miR-31-5p	0	-0.17	0.32	2007, 2009, 2011
UCN2	ENST00000273610.3	urocortin 2	44	1	1	0	0	0	0	0	0	0	mmu-miR-31-5p	-0.64	-0.64	0.31	2007, 2009, 2011
NEDD4L	ENST00000256832.7	neural precursor cell expressed, developmentally down-regulated 4-like, E3 ubiquitin protein ligase	617	1	1	0	0	1	0	1	0	2	mmu-miR-31-5p	-0.04	-0.17	0.31	2011
SLBP	ENST00000429429.2	stem-loop binding protein	1181	1	0	1	0	0	0	0	0	0	mmu-miR-31-5p	-0.5	-0.5	0.31	2011
GLTSCR1	ENST00000396720.3	glioma tumor suppressor candidate region gene 1	36	1	0	1	0	1	0	1	0	0	mmu-miR-31-5p	-0.46	-0.46	0.31	2007, 2009, 2011
CGN	ENST00000271636.7	cingulin	17	1	0	1	0	1	0	1	0	1	mmu-miR-31-5p	-0.41	-0.41	0.31	2009, 2011
VPS39	ENST00000318006.5	vacuolar protein sorting 39 homolog (S. cerevisiae)	165	1	0	1	0	1	0	0	1	0	mmu-miR-31-5p	-0.32	-0.35	0.31	2009, 2011
PPP3CA	ENST00000512215.1	protein phosphatase 3, catalytic subunit, alpha isozyme	259	1	0	1	0	0	0	0	0	1	mmu-miR-31-5p	-0.27	-0.27	0.31	2007, 2009, 2011
CDIP1	ENST00000564828.1	cell death-inducing p53 target 1	1857	1	0	1	0	0	0	0	0	2	mmu-miR-31-5p	-0.26	-0.34	0.31	2007, 2009, 2011
ATL2	ENST00000406122.1	atlastin GTPase 2	1135	1	0	1	0	0	0	0	0	0	mmu-miR-31-5p	-0.26	-0.26	0.31	2011
CSRNP3	ENST00000314499.7	cysteine-serine-rich nuclear protein 3	24	1	0	1	0	4	0	3	1	1	mmu-miR-31-5p	-0.25	-0.25	0.31	2011
FAM134B	ENST00000399793.2	family with sequence similarity 134, member B	102	1	0	1	0	0	0	0	0	0	mmu-miR-31-5p	-0.23	-0.33	0.31	2011
EGLN3	ENST00000250457.3	egl-9 family hypoxia-inducible factor 3	71	1	0	1	0	0	0	0	0	0	mmu-miR-31-5p	-0.23	-0.23	0.31
GRB10	ENST00000398812.2	growth factor receptor-bound protein 10	1382	1	0	1	0	0	0	0	0	1	mmu-miR-31-5p	-0.23	-0.23	0.31	2009, 2011
ZFP36L1	ENST00000555997.1	ZFP36 ring finger protein-like 1	231	1	0	1	0	0	0	0	0	0	mmu-miR-31-5p	-0.23	-0.27	0.31	2007, 2009, 2011
GATAD2B	ENST00000368655.4	GATA zinc finger domain containing 2B	48	1	0	1	0	1	0	1	0	3	mmu-miR-31-5p	-0.2	-0.39	0.31	2011
KIAA1211	ENST00000504228.1	KIAA1211	631	1	0	1	0	0	0	0	0	1	mmu-miR-31-5p	-0.15	-0.15	0.31	2009, 2011
RSF1	ENST00000308488.6	remodeling and spacing factor 1	216	1	0	1	0	0	0	0	0	2	mmu-miR-31-5p	-0.14	-0.15	0.31
SMARCD1	ENST00000394963.4	SWI/SNF related, matrix associated, actin dependent regulator of chromatin, subfamily d, member 1	952	1	0	1	0	0	0	0	0	0	mmu-miR-31-5p	-0.13	-0.14	0.31	2011
ZSCAN25	ENST00000394152.2	zinc finger and SCAN domain containing 25	230	1	0	1	0	0	0	0	0	0	mmu-miR-31-5p	-0.11	-0.21	0.31	2009, 2011
MAFG	ENST00000357736.4	v-maf avian musculoaponeurotic fibrosarcoma oncogene homolog G	5	1	0	1	0	0	0	0	0	1	mmu-miR-31-5p	-0.09	-0.09	0.31	2007, 2011
CALCR	ENST00000359558.2	calcitonin receptor	5	1	0	1	0	0	0	0	0	0	mmu-miR-31-5p	-0.09	-0.09	0.31	2007, 2009, 2011
MLEC	ENST00000228506.3	malectin	12084	1	0	1	0	0	0	0	0	0	mmu-miR-31-5p	-0.08	-0.08	0.31	2007, 2011
MLXIP	ENST00000319080.7	MLX interacting protein	69	1	0	1	0	0	0	0	0	0	mmu-miR-31-5p	-0.05	-0.19	0.31	2007, 2009, 2011
TEX261	ENST00000272438.4	testis expressed 261	359	1	0	1	0	0	0	0	0	0	mmu-miR-31-5p	-0.05	-0.06	0.31	2007, 2009, 2011
EPC1	ENST00000319778.6	enhancer of polycomb homolog 1 (Drosophila)	102	1	0	1	0	0	0	0	0	0	mmu-miR-31-5p	-0.03	-0.22	0.31
LSAMP	ENST00000490035.2	limbic system-associated membrane protein	19	1	0	1	0	1	1	0	0	1	mmu-miR-31-5p	-0.03	-0.1	0.31	2011
ALDH6A1	ENST00000553458.1	aldehyde dehydrogenase 6 family, member A1	196	1	0	1	0	0	0	0	0	0	mmu-miR-31-5p	-0.02	-0.26	0.31
DICER1	ENST00000541352.1	dicer 1, ribonuclease type III	25	1	0	1	0	0	0	0	0	0	mmu-miR-31-5p	-0.01	-0.11	0.31	2011
VTI1A	ENST00000393077.2	vesicle transport through interaction with t-SNAREs 1A	376	1	1	0	0	0	0	0	0	3	mmu-miR-31-5p	-0.12	-0.46	0.3
PCDHA12	ENST00000398631.2	protocadherin alpha 12	86	1	1	0	0	0	0	0	0	0	mmu-miR-31-5p	-0.01	-0.11	0.3	2009, 2011
PCDHA7	ENST00000525929.1	protocadherin alpha 7	86	1	1	0	0	0	0	0	0	0	mmu-miR-31-5p	-0.01	-0.1	0.3	2009, 2011
PCDHA5	ENST00000529859.1	protocadherin alpha 5	86	1	1	0	0	0	0	0	0	0	mmu-miR-31-5p	-0.01	-0.1	0.3	2009, 2011
PCDHA3	ENST00000522353.2	protocadherin alpha 3	86	1	1	0	0	0	0	0	0	0	mmu-miR-31-5p	-0.01	-0.1	0.3	2009, 2011
PCDHA6	ENST00000529310.1	protocadherin alpha 6	86	1	1	0	0	0	0	0	0	0	mmu-miR-31-5p	-0.01	-0.1	0.3	2009, 2011
PCDHA8	ENST00000531613.1	protocadherin alpha 8	86	1	1	0	0	0	0	0	0	0	mmu-miR-31-5p	-0.01	-0.1	0.3	2009, 2011
PCDHA10	ENST00000307360.5	protocadherin alpha 10	86	1	1	0	0	0	0	0	0	0	mmu-miR-31-5p	-0.01	-0.1	0.3	2009, 2011
PCDHA11	ENST00000398640.2	protocadherin alpha 11	86	1	1	0	0	0	0	0	0	0	mmu-miR-31-5p	-0.01	-0.1	0.3	2009, 2011
PCDHA1	ENST00000504120.2	protocadherin alpha 1	86	1	1	0	0	0	0	0	0	0	mmu-miR-31-5p	-0.01	-0.1	0.3	2009, 2011
PCDHA2	ENST00000526136.1	protocadherin alpha 2	86	1	1	0	0	0	0	0	0	0	mmu-miR-31-5p	-0.01	-0.1	0.3	2009, 2011
PCDHA4	ENST00000530339.1	protocadherin alpha 4	86	1	1	0	0	0	0	0	0	0	mmu-miR-31-5p	-0.01	-0.1	0.3	2009, 2011
PCDHA9	ENST00000532602.1	protocadherin alpha 9	86	1	1	0	0	0	0	0	0	0	mmu-miR-31-5p	-0.01	-0.1	0.3	2011
PCDHA13	ENST00000289272.2	protocadherin alpha 13	86	1	1	0	0	0	0	0	0	0	mmu-miR-31-5p	-0.01	-0.1	0.3	2009, 2011
PCDHAC1	ENST00000253807.2	protocadherin alpha subfamily C, 1	86	1	1	0	0	0	0	0	0	0	mmu-miR-31-5p	-0.01	-0.1	0.3	2009, 2011
PCDHAC2	ENST00000289269.5	protocadherin alpha subfamily C, 2	86	1	1	0	0	0	0	0	0	0	mmu-miR-31-5p	-0.01	-0.1	0.3	2009, 2011
OXSR1	ENST00000311806.3	oxidative stress responsive 1	1790	1	0	1	0	2	1	1	0	1	mmu-miR-31-5p	-0.71	-0.71	0.3	2007, 2009, 2011
POU2F3	ENST00000260264.4	POU class 2 homeobox 3	5	1	0	1	0	1	0	1	0	0	mmu-miR-31-5p	-0.36	-0.36	0.3	2009, 2011
NUP153	ENST00000262077.2	nucleoporin 153kDa	231	1	0	1	0	0	0	0	0	0	mmu-miR-31-5p	-0.29	-0.3	0.3	2007
INSC	ENST00000528567.1	inscuteable homolog (Drosophila)	27	1	0	1	0	0	0	0	0	0	mmu-miR-31-5p	-0.25	-0.35	0.3	2007, 2009, 2011
ZDHHC20	ENST00000320220.9	zinc finger, DHHC-type containing 20	1486	1	0	1	0	1	0	0	1	0	mmu-miR-31-5p	-0.22	-0.22	0.3
CEP85	ENST00000252992.4	centrosomal protein 85kDa	471	1	0	1	0	0	0	0	0	0	mmu-miR-31-5p	-0.2	-0.2	0.3	2007, 2011
C11orf87	ENST00000327419.6	chromosome 11 open reading frame 87	5	1	0	1	0	1*	0	0	0	1	mmu-miR-31-5p	-0.2	-0.2	0.3	2011
SYDE1	ENST00000342784.2	synapse defective 1, Rho GTPase, homolog 1 (C. elegans)	249	1	0	1	0	0	0	0	0	0	mmu-miR-31-5p	-0.14	-0.14	0.3	2011
SLC24A3	ENST00000328041.6	solute carrier family 24 (sodium/potassium/calcium exchanger), member 3	63	1	0	1	0	0	0	0	0	0	mmu-miR-31-5p	-0.11	-0.11	0.3	2007, 2009
CBX5	ENST00000209875.4	chromobox homolog 5	360	1	0	1	0	1	0	1	0	0	mmu-miR-31-5p	-0.1	-0.31	0.3	2011
HBEGF	ENST00000230990.6	heparin-binding EGF-like growth factor	28	1	0	1	0	0	0	0	0	0	mmu-miR-31-5p	-0.08	-0.2	0.3	2007, 2011
VWA3A	ENST00000389398.5	von Willebrand factor A domain containing 3A	5	1	0	1	0	0	0	0	0	0	mmu-miR-31-5p	-0.08	-0.08	0.3	2011
NCOA2	ENST00000452400.2	nuclear receptor coactivator 2	271	1	0	1	0	0	0	0	0	0	mmu-miR-31-5p	-0.06	-0.06	0.3
CCDC113	ENST00000443128.2	coiled-coil domain containing 113	29	1	0	1	0	0	0	0	0	0	mmu-miR-31-5p	-0.03	-0.2	0.3
LMAN2	ENST00000515209.1	lectin, mannose-binding 2	2441	1	0	1	0	0	0	0	0	0	mmu-miR-31-5p	-0.02	-0.24	0.3	2009, 2011
KIAA0141	ENST00000194118.4	KIAA0141	1078	1	0	1	0	1	0	1	0	1	mmu-miR-31-5p	-0.01	-0.08	0.3	2011
RGS4	ENST00000531057.1	regulator of G-protein signaling 4	489	1	0	1	0	0	0	0	0	0	mmu-miR-31-5p	0	-0.21	0.3	2007, 2009, 2011
PTCHD1	ENST00000379361.4	patched domain containing 1	59	1	1	0	0	1	0	1	0	0	mmu-miR-31-5p	-0.02	-0.15	0.29
GJD2	ENST00000290374.4	gap junction protein, delta 2, 36kDa	5	1	0	1	0	0	0	0	0	0	mmu-miR-31-5p	-0.39	-0.39	0.29
DCAF12L1	ENST00000371126.1	DDB1 and CUL4 associated factor 12-like 1	5	1	0	1	0	0	0	0	0	0	mmu-miR-31-5p	-0.26	-0.27	0.29	2011
AMMECR1	ENST00000262844.5	Alport syndrome, mental retardation, midface hypoplasia and elliptocytosis chromosomal region gene 1	5	1	0	1	0	1	0	0	1	0	mmu-miR-31-5p	-0.2	-0.2	0.29
VAT1L	ENST00000302536.2	vesicle amine transport 1-like	123	1	0	1	0	0	0	0	0	0	mmu-miR-31-5p	-0.19	-0.19	0.29
AXIN1	ENST00000262320.3	axin 1	27	1	0	1	0	0	0	0	0	0	mmu-miR-31-5p	-0.18	-0.18	0.29	2007
PDE11A	ENST00000286063.6	phosphodiesterase 11A	7	1	0	1	0	0	0	0	0	0	mmu-miR-31-5p	-0.16	-0.16	0.29	2007
RALGPS1	ENST00000259351.5	Ral GEF with PH domain and SH3 binding motif 1	34	1	0	1	0	2	0	1	1	1	mmu-miR-31-5p	-0.16	-0.18	0.29	2009, 2011
SNN	ENST00000329565.5	stannin	663	1	0	1	0	0	0	0	0	0	mmu-miR-31-5p	-0.14	-0.15	0.29	2009, 2011
KIAA0226	ENST00000273582.5	KIAA0226	89	1	0	1	0	1	0	1	0	0	mmu-miR-31-5p	-0.13	-0.3	0.29
SRSF10	ENST00000343255.5	serine/arginine-rich splicing factor 10	1920	1	0	1	0	0	0	0	0	0	mmu-miR-31-5p	-0.09	-0.09	0.29
CPSF2	ENST00000298875.4	cleavage and polyadenylation specific factor 2, 100kDa	945	1	0	1	0	0	0	0	0	0	mmu-miR-31-5p	-0.06	-0.23	0.29
TAOK1	ENST00000261716.3	TAO kinase 1	164	1	0	1	0	1	0	1	0	1	mmu-miR-31-5p	-0.02	-0.09	0.29	2011
PRPF40A	ENST00000410080.1	PRP40 pre-mRNA processing factor 40 homolog A (S. cerevisiae)	459	1	0	1	0	0	0	0	0	0	mmu-miR-31-5p	-0.01	-0.12	0.29	2011
AHSG	ENST00000411641.2	alpha-2-HS-glycoprotein	144558	1	1	0	0	0	0	0	0	0	mmu-miR-31-5p	-0.51	-0.51	0.28	2009, 2011
XYLT1	ENST00000261381.6	xylosyltransferase I	159	1	1	0	0	6	1	2	3	0	mmu-miR-31-5p	-0.33	-0.35	0.28	2011
MBNL3	ENST00000370839.3	muscleblind-like splicing regulator 3	593	1	1	0	0	1	0	1	0	5	mmu-miR-31-5p	-0.28	-0.38	0.28
IKZF1	ENST00000331340.3	IKAROS family zinc finger 1 (Ikaros)	11	1	1	0	0	1	0	1	0	0	mmu-miR-31-5p	-0.16	-0.34	0.28	2009, 2011
RNF183	ENST00000441031.3	ring finger protein 183	24	1	1	0	0	0	0	0	0	0	mmu-miR-31-5p	-0.45	-0.65	0.27	2009, 2011
ELAVL1	ENST00000407627.2	ELAV like RNA binding protein 1	2812	1	1	0	0	1*	0	0	0	1	mmu-miR-31-5p	-0.32	-0.5	0.27	2007, 2009, 2011
SIM1	ENST00000369208.3	single-minded homolog 1 (Drosophila)	104	1	1	0	0	0	0	0	0	2	mmu-miR-31-5p	-0.54	-0.55	0.26
CD28	ENST00000324106.8	CD28 molecule	5	1	1	0	0	1	0	0	1	0	mmu-miR-31-5p	-0.53	-0.53	0.26	2007, 2009, 2011
SMIM13	ENST00000416247.2	small integral membrane protein 13	199	1	1	0	0	1	0	1	0	0	mmu-miR-31-5p	-0.35	-0.57	0.25	2011
UCK2	ENST00000372212.4	uridine-cytidine kinase 2	437	1	0	0	1	1	0	1	0	0	mmu-miR-31-5p	-0.31	-0.47	0.25
SLC2A4	ENST00000317370.8	solute carrier family 2 (facilitated glucose transporter), member 4	233	1	1	0	0	0	0	0	0	0	mmu-miR-31-5p	-0.24	-0.24	0.24	2007, 2009, 2011
NEK9	ENST00000238616.5	NIMA-related kinase 9	733	1	1	0	0	1	0	0	1	2	mmu-miR-31-5p	-0.04	-0.37	0.24
YPEL2	ENST00000312655.4	yippee-like 2 (Drosophila)	62	1	0	0	1	3	0	1	2	0	mmu-miR-31-5p	-0.48	-0.48	0.24	2007
RNF144B	ENST00000259939.3	ring finger protein 144B	17	1	0	0	1	0	0	0	0	2	mmu-miR-31-5p	-0.47	-0.47	0.24	2007, 2011
BOD1L2	ENST00000585477.1	biorientation of chromosomes in cell division 1-like 2	5	1	0	0	1	0	0	0	0	0	mmu-miR-31-5p	-0.43	-0.43	0.24
AL590483.1	ENST00000598000.1	Uncharacterized protein; cDNA FLJ42623 fis, clone BRACE3015894	5	1	0	0	1	1	1	0	0	0	mmu-miR-31-5p	-0.43	-0.43	0.24
PDZD4	ENST00000164640.4	PDZ domain containing 4	7	1	0	0	1	1	1	0	0	0	mmu-miR-31-5p	-0.41	-0.41	0.24	2007, 2009, 2011
SAMD12	ENST00000409003.4	sterile alpha motif domain containing 12	57	1	0	0	1	1	0	0	1	1	mmu-miR-31-5p	-0.4	-0.4	0.24
FLOT1	ENST00000376389.3	flotillin 1	809	1	0	0	1	0	0	0	0	1	mmu-miR-31-5p	-0.4	-0.4	0.24	2011
ENY2	ENST00000520147.1	enhancer of yellow 2 homolog (Drosophila)	1814	1	0	0	1	0	0	0	0	0	mmu-miR-31-5p	-0.39	-0.39	0.24	2007, 2011
BICD1	ENST00000548411.1	bicaudal D homolog 1 (Drosophila)	205	1	0	0	1	1	1	0	0	0	mmu-miR-31-5p	-0.34	-0.41	0.24
ARHGEF26	ENST00000356448.4	Rho guanine nucleotide exchange factor (GEF) 26	164	1	0	0	1	0	0	0	0	1	mmu-miR-31-5p	-0.33	-0.33	0.24
ZBTB34	ENST00000319119.4	zinc finger and BTB domain containing 34	726	1	0	0	1	1	0	0	1	0	mmu-miR-31-5p	-0.31	-0.31	0.24	2009, 2011
CCNJ	ENST00000265992.5	cyclin J	5	1	0	0	1	0	0	0	0	1	mmu-miR-31-5p	-0.29	-0.29	0.24	2007, 2009, 2011
GRIK3	ENST00000373091.3	glutamate receptor, ionotropic, kainate 3	7	1	0	0	1	3	1	0	2	2	mmu-miR-31-5p	-0.28	-0.28	0.24	2009, 2011
TMEM168	ENST00000312814.6	transmembrane protein 168	195	1	0	0	1	0	0	0	0	0	mmu-miR-31-5p	-0.26	-0.3	0.24	2007, 2009, 2011
FXR1	ENST00000357559.4	fragile X mental retardation, autosomal homolog 1	434	1	0	0	1	0	0	0	0	0	mmu-miR-31-5p	-0.24	-0.24	0.24	2007, 2009, 2011
VPS26B	ENST00000281187.5	vacuolar protein sorting 26 homolog B (S. pombe)	1236	1	0	0	1	1	0	1	0	1	mmu-miR-31-5p	-0.23	-0.25	0.24	2007, 2009, 2011
PLXDC2	ENST00000377252.4	plexin domain containing 2	506	1	0	0	1	2	0	1	1	1	mmu-miR-31-5p	-0.23	-0.4	0.24
RBMS1	ENST00000348849.3	RNA binding motif, single stranded interacting protein 1	90	1	0	0	1	0	0	0	0	0	mmu-miR-31-5p	-0.22	-0.22	0.24	2011
ARRDC3	ENST00000265138.3	arrestin domain containing 3	1313	1	0	0	1	0	0	0	0	1	mmu-miR-31-5p	-0.21	-0.21	0.24	2007, 2009, 2011
VAMP4	ENST00000236192.7	vesicle-associated membrane protein 4	282	1	0	0	1	0	0	0	0	0	mmu-miR-31-5p	-0.21	-0.29	0.24	2007, 2009, 2011
PPM1F	ENST00000263212.5	protein phosphatase, Mg2+/Mn2+ dependent, 1F	786	1	0	0	1	1	0	0	1	0	mmu-miR-31-5p	-0.2	-0.3	0.24
PRKCE	ENST00000306156.3	protein kinase C, epsilon	164	1	0	0	1	0	0	0	0	1	mmu-miR-31-5p	-0.2	-0.2	0.24	2009, 2011
PVRL3	ENST00000319792.3	poliovirus receptor-related 3	361	1	0	0	1	1	1	0	0	0	mmu-miR-31-5p	-0.2	-0.24	0.24
KIF2A	ENST00000381103.2	kinesin heavy chain member 2A	905	1	0	0	1	0	0	0	0	1	mmu-miR-31-5p	-0.2	-0.23	0.24
PCDH8	ENST00000377942.3	protocadherin 8	11	1	0	0	1	1	0	1	0	0	mmu-miR-31-5p	-0.19	-0.32	0.24	2007, 2011
KLF3	ENST00000261438.5	Kruppel-like factor 3 (basic)	515	1	0	0	1	1	0	1	0	0	mmu-miR-31-5p	-0.18	-0.22	0.24	2007, 2009, 2011
RDX	ENST00000343115.4	radixin	44	1	0	0	1	0	0	0	0	1	mmu-miR-31-5p	-0.17	-0.17	0.24	2007, 2009, 2011
RIMS3	ENST00000372684.3	regulating synaptic membrane exocytosis 3	24	1	0	0	1	3	1	2	0	1	mmu-miR-31-5p	-0.17	-0.57	0.24	2007, 2009
CYB5B	ENST00000512062.1	cytochrome b5 type B (outer mitochondrial membrane)	2472	1	0	0	1	1	0	0	1	1	mmu-miR-31-5p	-0.16	-0.35	0.24
HOMER1	ENST00000508576.1	homer homolog 1 (Drosophila)	394	1	0	0	1	0	0	0	0	0	mmu-miR-31-5p	-0.16	-0.16	0.24	2011
SS18L1	ENST00000331758.3	synovial sarcoma translocation gene on chromosome 18-like 1	274	1	0	0	1	0	0	0	0	0	mmu-miR-31-5p	-0.15	-0.19	0.24	2007, 2009, 2011
ZFHX4	ENST00000521891.2	zinc finger homeobox 4	194	1	0	0	1	0	0	0	0	0	mmu-miR-31-5p	-0.14	-0.14	0.24	2007, 2009, 2011
ABLIM1	ENST00000392952.3	actin binding LIM protein 1	1321	1	0	0	1	0	0	0	0	0	mmu-miR-31-5p	-0.13	-0.13	0.24	2007, 2009, 2011
GPRIN3	ENST00000609438.1	GPRIN family member 3	213	1	0	0	1	0	0	0	0	0	mmu-miR-31-5p	-0.12	-0.13	0.24
UBN2	ENST00000473989.3	ubinuclein 2	238	1	0	0	1	1	0	1	0	2	mmu-miR-31-5p	-0.12	-0.14	0.24	2009, 2011
HELZ	ENST00000358691.5	helicase with zinc finger	571	1	0	0	1	2	0	1	1	2	mmu-miR-31-5p	-0.12	-0.17	0.24	2011
BEND4	ENST00000504360.1	BEN domain containing 4	187	1	0	0	1	1	1	0	0	0	mmu-miR-31-5p	-0.12	-0.12	0.24	2009, 2011
ELAVL2	ENST00000380110.4	ELAV like neuron-specific RNA binding protein 2	78	1	0	0	1	0	0	0	0	0	mmu-miR-31-5p	-0.11	-0.12	0.24	2007, 2009, 2011
CTIF	ENST00000256413.3	CBP80/20-dependent translation initiation factor	154	1	0	0	1	0	0	0	0	0	mmu-miR-31-5p	-0.11	-0.14	0.24	2009, 2011
STAM2	ENST00000263904.4	signal transducing adaptor molecule (SH3 domain and ITAM motif) 2	296	1	0	0	1	0	0	0	0	0	mmu-miR-31-5p	-0.11	-0.11	0.24	2007, 2011
FIGN	ENST00000333129.3	fidgetin	10	1	0	0	1	1	0	0	1	0	mmu-miR-31-5p	-0.11	-0.11	0.24
PREPL	ENST00000541738.1	prolyl endopeptidase-like	612	1	0	0	1	0	0	0	0	0	mmu-miR-31-5p	-0.1	-0.12	0.24	2007, 2011
SLC39A9	ENST00000031146.4	solute carrier family 39, member 9	824	1	0	0	1	0	0	0	0	1	mmu-miR-31-5p	-0.09	-0.12	0.24	2011
HEY2	ENST00000368365.1	hairy/enhancer-of-split related with YRPW motif 2	70	1	0	0	1	0	0	0	0	0	mmu-miR-31-5p	-0.08	-0.31	0.24
EIF4E3	ENST00000425534.3	eukaryotic translation initiation factor 4E family member 3	475	1	0	0	1	2	0	1	1	2	mmu-miR-31-5p	-0.07	-0.23	0.24
IPO11	ENST00000409534.1	importin 11	202	1	0	0	1	2	0	1	1	0	mmu-miR-31-5p	-0.07	-0.76	0.24
DMD	ENST00000378677.2	dystrophin	211	1	0	0	1	1	1	0	0	0	mmu-miR-31-5p	-0.06	-0.33	0.24	2011
ZNF704	ENST00000327835.3	zinc finger protein 704	124	1	0	0	1	0	0	0	0	0	mmu-miR-31-5p	-0.03	-0.09	0.24	2011
PIGV	ENST00000078527.4	phosphatidylinositol glycan anchor biosynthesis, class V	122	1	0	0	1	0	0	0	0	0	mmu-miR-31-5p	-0.03	-0.15	0.24
CASD1	ENST00000297273.4	CAS1 domain containing 1	270	1	0	0	1	0	0	0	0	0	mmu-miR-31-5p	-0.02	-0.19	0.24
UBE2N	ENST00000550657.1	ubiquitin-conjugating enzyme E2N	321	1	0	0	1	0	0	0	0	0	mmu-miR-31-5p	-0.02	-0.17	0.24	2007
MRPL48	ENST00000535529.1	mitochondrial ribosomal protein L48	354	1	0	0	1	0	0	0	0	0	mmu-miR-31-5p	-0.02	-0.29	0.24
GTDC1	ENST00000392869.2	glycosyltransferase-like domain containing 1	241	1	0	0	1	0	0	0	0	2	mmu-miR-31-5p	-0.01	-0.19	0.24
EGLN1	ENST00000366641.3	egl-9 family hypoxia-inducible factor 1	505	1	0	0	1	0	0	0	0	0	mmu-miR-31-5p	-0.01	-0.12	0.24
RBM23	ENST00000555209.1	RNA binding motif protein 23	1540	1	0	0	1	0	0	0	0	1	mmu-miR-31-5p	0	-0.35	0.24
SLC17A8	ENST00000323346.5	solute carrier family 17 (vesicular glutamate transporter), member 8	5	1	1	0	0	0	0	0	0	0	mmu-miR-31-5p	-0.17	-0.17	0.23	2009, 2011
USP49	ENST00000394253.3	ubiquitin specific peptidase 49	44	1	1	0	0	2	0	1	1	1	mmu-miR-31-5p	-0.11	-0.13	0.23
MAP1B	ENST00000296755.7	microtubule-associated protein 1B	259	1	1	0	0	0	0	0	0	0	mmu-miR-31-5p	-0.19	-0.2	0.22
MOSPD2	ENST00000380492.3	motile sperm domain containing 2	76	1	1	0	0	0	0	0	0	0	mmu-miR-31-5p	-0.1	-0.41	0.22
GSPT1	ENST00000434724.2	G1 to S phase transition 1	1119	1	1	0	0	0	0	0	0	0	mmu-miR-31-5p	-0.02	-0.17	0.22	2011
LGALSL	ENST00000409537.2	lectin, galactoside-binding-like	334	1	1	0	0	0	0	0	0	0	mmu-miR-31-5p	-0.04	-0.5	0.21	2009, 2011
KREMEN1	ENST00000400335.4	kringle containing transmembrane protein 1	606	1	1	0	0	0	0	0	0	0	mmu-miR-31-5p	-0.09	-0.09	0.2
HNRNPA0	ENST00000314940.4	heterogeneous nuclear ribonucleoprotein A0	22668	1	1	0	0	0	0	0	0	1	mmu-miR-31-5p	-0.06	-0.38	0.2
HSPH1	ENST00000320027.5	heat shock 105kDa/110kDa protein 1	4109	1	1	0	0	0	0	0	0	0	mmu-miR-31-5p	0	-0.42	0.2

## Sheet: miR-205-5p
Ortholog of target gene	Representative transcript	Gene name	3P-seq tags + 5	Conserved sites total	Conserved 8mer sites	Conserved 7mer-m8 sites	Conserved 7mer-A1 sites	Poorly conserved sites total	Poorly conserved 8mer sites	Poorly conserved 7mer-m8 sites	Poorly conserved 7mer-A1 sites	6mer sites	Representative miRNA	Cumulative weighted context++ score	Total context++ score	Aggregate PCT	Previous TargetScan publication(s)
CHN1	ENST00000409900.3	chimerin 1	344	2	2	0	0	0	0	0	0	0	mmu-miR-205-5p	-0.92	-0.92	0.97	2005, 2007, 2009, 2011
ABHD10	ENST00000494817.1	abhydrolase domain containing 10	929	2	2	0	0	0	0	0	0	0	mmu-miR-205-5p	-0.48	-0.49	ORF
AAK1	ENST00000409085.4	AP2 associated kinase 1	27	2	2	0	0	1	0	1	0	2	mmu-miR-205-5p	-0.29	-0.3	0.79	2007, 2009, 2011
MGRN1	ENST00000415496.1	mahogunin ring finger 1, E3 ubiquitin protein ligase	2337	2	2	0	0	0	0	0	0	0	mmu-miR-205-5p	-0.24	-0.24	0.91	2005, 2007, 2009, 2011
LCOR	ENST00000371103.3	ligand dependent nuclear receptor corepressor	94	2	2	0	0	2	1	0	1	2	mmu-miR-205-5p	-0.1	-0.1	0.49	2007, 2009, 2011
PET117	ENST00000432901.3	PET117 homolog (S. cerevisiae)	120	1	1	0	0	1	1	0	0	1	mmu-miR-205-5p	-0.86	-0.86	< 0.1
ALG11	ENST00000523764.1	ALG11, alpha-1,2-mannosyltransferase	121	1	1	0	0	0	0	0	0	0	mmu-miR-205-5p	-0.78	-0.78	ORF
RBMX	ENST00000562646.1	RNA binding motif protein, X-linked	77	1	1	0	0	0	0	0	0	2	mmu-miR-205-5p	-0.67	-0.68	< 0.1
CDH11	ENST00000394156.3	cadherin 11, type 2, OB-cadherin (osteoblast)	448	3	1	2	0	1	0	0	1	1	mmu-miR-205-5p	-0.6	-0.66	0.25	2005, 2007
SLC35B3	ENST00000379660.4	solute carrier family 35 (adenosine 3'-phospho 5'-phosphosulfate transporter), member B3	83	1	1	0	0	1	0	1	0	2	mmu-miR-205-5p	-0.58	-0.66	0.87	2005, 2007, 2009, 2011
RNF146	ENST00000356799.2	ring finger protein 146	1504	1	1	0	0	1	0	0	1	0	mmu-miR-205-5p	-0.58	-0.58	ORF
COL16A1	ENST00000373672.3	collagen, type XVI, alpha 1	954	1	1	0	0	0	0	0	0	0	mmu-miR-205-5p	-0.56	-0.56	0.6	2009, 2011
CLDN11	ENST00000064724.3	claudin 11	1116	1	1	0	0	0	0	0	0	0	mmu-miR-205-5p	-0.54	-0.55	0.86	2005, 2007, 2009, 2011
HS3ST1	ENST00000002596.5	heparan sulfate (glucosamine) 3-O-sulfotransferase 1	9	1	1	0	0	1	0	0	1	2	mmu-miR-205-5p	-0.54	-0.55	0.89	2005, 2007, 2009, 2011
FAM136A	ENST00000450256.1	family with sequence similarity 136, member A	490	1	1	0	0	0	0	0	0	0	mmu-miR-205-5p	-0.53	-0.53	ORF
LRP1	ENST00000243077.3	low density lipoprotein receptor-related protein 1	270	1	1	0	0	1	1	0	0	0	mmu-miR-205-5p	-0.51	-0.54	0.72	2005, 2007, 2009, 2011
SEPT4	ENST00000426861.1	septin 4	40	2	1	1	0	1	0	0	1	0	mmu-miR-205-5p	-0.49	-0.49	ORF
SLC35A1	ENST00000369557.5	solute carrier family 35 (CMP-sialic acid transporter), member A1	671	1	1	0	0	0	0	0	0	0	mmu-miR-205-5p	-0.49	-0.49	0.38	2009, 2011
GXYLT1	ENST00000398675.3	glucoside xylosyltransferase 1	126	2	1	0	1	0	0	0	0	0	mmu-miR-205-5p	-0.47	-0.47	0.45	2009, 2011
RCBTB1	ENST00000258646.3	regulator of chromosome condensation (RCC1) and BTB (POZ) domain containing protein 1	9	1	1	0	0	0	0	0	0	1	mmu-miR-205-5p	-0.47	-0.51	0.18	2009, 2011
SSBP3	ENST00000417664.2	single stranded DNA binding protein 3	1474	1	1	0	0	0	0	0	0	0	mmu-miR-205-5p	-0.46	-0.46	0.8	2009, 2011
CLTC	ENST00000269122.3	clathrin, heavy chain (Hc)	10702	1	1	0	0	0	0	0	0	0	mmu-miR-205-5p	-0.46	-0.46	0.95	2005, 2007, 2009, 2011
TP53BP2	ENST00000391878.2	tumor protein p53 binding protein, 2	1531	1	1	0	0	0	0	0	0	0	mmu-miR-205-5p	-0.45	-0.45	> 0.99	2005, 2007, 2009, 2011
BICC1	ENST00000373886.3	bicaudal C homolog 1 (Drosophila)	165	1	1	0	0	0	0	0	0	3	mmu-miR-205-5p	-0.43	-0.43	0.58
MARCKS	ENST00000368635.4	myristoylated alanine-rich protein kinase C substrate	188	1	1	0	0	0	0	0	0	0	mmu-miR-205-5p	-0.43	-0.45	0.94	2011
ACSL1	ENST00000454703.2	acyl-CoA synthetase long-chain family member 1	121	1	1	0	0	0	0	0	0	0	mmu-miR-205-5p	-0.43	-0.49	0.54	2005, 2007, 2009, 2011
LENG9	ENST00000333834.4	leukocyte receptor cluster (LRC) member 9	5	1	1	0	0	0	0	0	0	0	mmu-miR-205-5p	-0.43	-0.43	< 0.1	2011
BTBD3	ENST00000254977.3	BTB (POZ) domain containing 3	3798	1	1	0	0	0	0	0	0	0	mmu-miR-205-5p	-0.42	-0.47	0.73	2005, 2007, 2009, 2011
ARRB2	ENST00000575877.1	arrestin, beta 2	158	1	1	0	0	0	0	0	0	1	mmu-miR-205-5p	-0.42	-0.42	ORF
RAP2B	ENST00000323534.2	RAP2B, member of RAS oncogene family	594	1	1	0	0	1	1	0	0	3	mmu-miR-205-5p	-0.41	-0.6	0.72	2009, 2011
SRSF10	ENST00000343255.5	serine/arginine-rich splicing factor 10	1920	1	1	0	0	1	0	1	0	1	mmu-miR-205-5p	-0.41	-0.6	0.9	2007, 2009, 2011
CERKL	ENST00000410087.3	ceramide kinase-like	8	1	1	0	0	0	0	0	0	0	mmu-miR-205-5p	-0.41	-0.41	0.13	2009, 2011
PIEZO1	ENST00000327397.7	piezo-type mechanosensitive ion channel component 1	3837	1	1	0	0	0	0	0	0	0	mmu-miR-205-5p	-0.39	-0.39	< 0.1	2011
RND3	ENST00000375734.2	Rho family GTPase 3	574	1	1	0	0	0	0	0	0	2	mmu-miR-205-5p	-0.39	-0.48	< 0.1	2005, 2007, 2011
ZFP57	ENST00000488757.1	ZFP57 zinc finger protein	8	1	1	0	0	0	0	0	0	0	mmu-miR-205-5p	-0.39	-0.69	< 0.1	2011
CASC4	ENST00000360824.3	cancer susceptibility candidate 4	5	1	1	0	0	0	0	0	0	0	mmu-miR-205-5p	-0.39	-0.39	< 0.1	2009, 2011
CTPS2	ENST00000443824.1	CTP synthase 2	47	1	1	0	0	0	0	0	0	0	mmu-miR-205-5p	-0.38	-0.54	0.27	2009, 2011
HSD17B11	ENST00000358290.4	hydroxysteroid (17-beta) dehydrogenase 11	269	1	1	0	0	0	0	0	0	0	mmu-miR-205-5p	-0.38	-0.43	0.25	2007, 2009, 2011
C3orf80	ENST00000326474.3	chromosome 3 open reading frame 80	296	1	1	0	0	0	0	0	0	0	mmu-miR-205-5p	-0.36	-0.36	0.42	2011
LRRK2	ENST00000298910.7	leucine-rich repeat kinase 2	37	1	1	0	0	0	0	0	0	1	mmu-miR-205-5p	-0.36	-0.36	0.55	2007, 2009, 2011
HELLS	ENST00000394036.1	helicase, lymphoid-specific	329	1	1	0	0	1	0	1	0	0	mmu-miR-205-5p	-0.36	-0.46	ORF
CCNJ	ENST00000265992.5	cyclin J	5	1	1	0	0	0	0	0	0	1	mmu-miR-205-5p	-0.36	-0.36	0.82	2005, 2007, 2009, 2011
TGFA	ENST00000295400.6	transforming growth factor, alpha	36	1	1	0	0	1	0	1	0	2	mmu-miR-205-5p	-0.36	-0.36	0.77	2009, 2011
RTN3	ENST00000339997.4	reticulon 3	85	1	1	0	0	0	0	0	0	0	mmu-miR-205-5p	-0.34	-0.34	ORF
PTPRM	ENST00000332175.8	protein tyrosine phosphatase, receptor type, M	553	1	1	0	0	0	0	0	0	0	mmu-miR-205-5p	-0.34	-0.34	0.48	2005, 2007, 2009, 2011
LHFPL2	ENST00000515007.2	lipoma HMGIC fusion partner-like 2	16	1	1	0	0	1	0	1	0	2	mmu-miR-205-5p	-0.33	-0.33	0.13	2005, 2007, 2009, 2011
FAM126A	ENST00000409923.1	family with sequence similarity 126, member A	241	1	1	0	0	1	0	1	0	1	mmu-miR-205-5p	-0.33	-0.43	0.32	2009, 2011
NAA11	ENST00000286794.4	N(alpha)-acetyltransferase 11, NatA catalytic subunit	66	1	1	0	0	0	0	0	0	0	mmu-miR-205-5p	-0.32	-0.32	< 0.1	2011
EZR	ENST00000337147.7	ezrin	3757	1	1	0	0	0	0	0	0	1	mmu-miR-205-5p	-0.31	-0.4	0.18	2009, 2011
TMEM255A	ENST00000309720.5	transmembrane protein 255A	113	1	1	0	0	0	0	0	0	0	mmu-miR-205-5p	-0.31	-0.31	0.37	2009, 2011
SBF2	ENST00000256190.8	SET binding factor 2	65	1	1	0	0	0	0	0	0	0	mmu-miR-205-5p	-0.31	-0.34	0.74	2011
ADAMTS9	ENST00000295903.4	ADAM metallopeptidase with thrombospondin type 1 motif, 9	5	1	1	0	0	0	0	0	0	0	mmu-miR-205-5p	-0.3	-0.3	0.82	2005, 2007, 2009, 2011
NTNG1	ENST00000370067.1	netrin G1	5	1	1	0	0	1	0	1	0	0	mmu-miR-205-5p	-0.29	-0.29	< 0.1
SORBS1	ENST00000371227.4	sorbin and SH3 domain containing 1	22	1	1	0	0	1	0	1	0	0	mmu-miR-205-5p	-0.29	-0.29	0.71	2005, 2007, 2009, 2011
MSI2	ENST00000284073.2	musashi RNA-binding protein 2	283	1	1	0	0	0	0	0	0	2	mmu-miR-205-5p	-0.28	-0.34	0.67
MFNG	ENST00000416983.3	MFNG O-fucosylpeptide 3-beta-N-acetylglucosaminyltransferase	14	1	1	0	0	0	0	0	0	0	mmu-miR-205-5p	-0.28	-0.28	0.13	2009, 2011
EPB41	ENST00000373798.1	erythrocyte membrane protein band 4.1 (elliptocytosis 1, RH-linked)	53	1	1	0	0	0	0	0	0	2	mmu-miR-205-5p	-0.27	-0.27	0.69	2005, 2007, 2009, 2011
LAMC1	ENST00000258341.4	laminin, gamma 1 (formerly LAMB2)	1082	1	1	0	0	0	0	0	0	0	mmu-miR-205-5p	-0.27	-0.34	0.77	2005, 2007, 2009, 2011
CALU	ENST00000535011.2	calumenin	3079	1	1	0	0	2	0	2	0	0	mmu-miR-205-5p	-0.27	-0.43	0.48	2005, 2007, 2009, 2011
PHC2	ENST00000431992.1	polyhomeotic homolog 2 (Drosophila)	11	1	1	0	0	0	0	0	0	0	mmu-miR-205-5p	-0.27	-0.27	0.59	2005, 2007, 2009, 2011
TAOK1	ENST00000261716.3	TAO kinase 1	164	1	1	0	0	1	0	0	1	1	mmu-miR-205-5p	-0.26	-0.34	0.61	2011
GATA3	ENST00000379328.3	GATA binding protein 3	136	1	1	0	0	1	0	1	0	1	mmu-miR-205-5p	-0.26	-0.36	0.44	2009, 2011
MDM4	ENST00000391947.2	Mdm4 p53 binding protein homolog (mouse)	443	1	1	0	0	0	0	0	0	0	mmu-miR-205-5p	-0.26	-0.27	ORF
NAA25	ENST00000261745.4	N(alpha)-acetyltransferase 25, NatB auxiliary subunit	919	1	1	0	0	0	0	0	0	0	mmu-miR-205-5p	-0.26	-0.26	0.86	2007, 2009, 2011
FBXO24	ENST00000360609.2	F-box protein 24	19	1	1	0	0	1	0	0	1	0	mmu-miR-205-5p	-0.26	-0.26	< 0.1
ENC1	ENST00000302351.4	ectodermal-neural cortex 1 (with BTB domain)	57	1	1	0	0	0	0	0	0	1	mmu-miR-205-5p	-0.25	-0.26	0.54	2009, 2011
INPPL1	ENST00000298229.2	inositol polyphosphate phosphatase-like 1	1138	1	1	0	0	0	0	0	0	0	mmu-miR-205-5p	-0.25	-0.25	0.56	2005, 2007, 2009, 2011
C16orf52	ENST00000542527.2	chromosome 16 open reading frame 52	102	2	1	0	1	2	0	0	2	1	mmu-miR-205-5p	-0.25	-0.67	0.66	2011
ESRRG	ENST00000361525.3	estrogen-related receptor gamma	5	2	1	0	1	0	0	0	0	1	mmu-miR-205-5p	-0.24	-0.24	0.6	2005, 2007, 2009, 2011
CBX1	ENST00000393408.3	chromobox homolog 1	26	1	1	0	0	0	0	0	0	0	mmu-miR-205-5p	-0.23	-0.23	0.3	2009, 2011
DUSP7	ENST00000495880.1	dual specificity phosphatase 7	68	1	1	0	0	0	0	0	0	0	mmu-miR-205-5p	-0.23	-0.39	0.84	2011
TUBB6	ENST00000591208.1	tubulin, beta 6 class V	5820	1	1	0	0	0	0	0	0	0	mmu-miR-205-5p	-0.23	-0.23	ORF
PNN	ENST00000216832.4	pinin, desmosome associated protein	858	1	1	0	0	0	0	0	0	1	mmu-miR-205-5p	-0.23	-0.48	< 0.1	2007
MLLT4	ENST00000400822.3	myeloid/lymphoid or mixed-lineage leukemia (trithorax homolog, Drosophila); translocated to, 4	232	1	1	0	0	1	0	1	0	0	mmu-miR-205-5p	-0.23	-0.23	0.74	2011
SLC19A2	ENST00000236137.5	solute carrier family 19 (thiamine transporter), member 2	229	1	1	0	0	0	0	0	0	0	mmu-miR-205-5p	-0.23	-0.23	0.18	2009, 2011
VEGFA	ENST00000417285.2	vascular endothelial growth factor A	907	1	1	0	0	0	0	0	0	0	mmu-miR-205-5p	-0.22	-0.23	0.53	2007, 2009, 2011
MMD	ENST00000262065.3	monocyte to macrophage differentiation-associated	558	1	1	0	0	0	0	0	0	0	mmu-miR-205-5p	-0.22	-0.22	< 0.1	2005, 2007, 2009, 2011
INHBA	ENST00000242208.4	inhibin, beta A	1260	1	1	0	0	0	0	0	0	0	mmu-miR-205-5p	-0.22	-0.22	0.17	2005, 2007, 2009, 2011
DLG2	ENST00000398309.2	discs, large homolog 2 (Drosophila)	15	1	1	0	0	0	0	0	0	1	mmu-miR-205-5p	-0.22	-0.22	0.6	2005, 2007, 2009, 2011
FA2H	ENST00000219368.3	fatty acid 2-hydroxylase	5	1	1	0	0	1	0	1	0	0	mmu-miR-205-5p	-0.22	-0.22	0.29	2009, 2011
ERBB3	ENST00000267101.3	v-erb-b2 avian erythroblastic leukemia viral oncogene homolog 3	926	1	1	0	0	0	0	0	0	0	mmu-miR-205-5p	-0.21	-0.21	0.78	2005, 2007, 2009, 2011
RBMS1	ENST00000348849.3	RNA binding motif, single stranded interacting protein 1	90	1	1	0	0	0	0	0	0	2	mmu-miR-205-5p	-0.21	-0.21	0.59	2011
RNF157	ENST00000269391.6	ring finger protein 157	163	1	1	0	0	0	0	0	0	0	mmu-miR-205-5p	-0.21	-0.23	0.46	2011
NACC2	ENST00000371753.1	NACC family member 2, BEN and BTB (POZ) domain containing	172	1	1	0	0	0	0	0	0	1	mmu-miR-205-5p	-0.21	-0.3	0.97	2007, 2011
PDE3B	ENST00000282096.4	phosphodiesterase 3B, cGMP-inhibited	258	1	1	0	0	1	0	0	1	0	mmu-miR-205-5p	-0.2	-0.32	0.71	2005, 2007, 2011
PLCB1	ENST00000378641.3	phospholipase C, beta 1 (phosphoinositide-specific)	21	1	1	0	0	4	0	1	3	1	mmu-miR-205-5p	-0.2	-0.2	0.15	2005, 2007, 2011
FAM155A	ENST00000375915.2	family with sequence similarity 155, member A	118	1	1	0	0	0	0	0	0	0	mmu-miR-205-5p	-0.2	-0.2	0.32	2007, 2009, 2011
EVX1	ENST00000222761.3	even-skipped homeobox 1	7	1	1	0	0	0	0	0	0	0	mmu-miR-205-5p	-0.2	-0.2	ORF
RORA	ENST00000335670.6	RAR-related orphan receptor A	102	1	1	0	0	1	0	0	1	2	mmu-miR-205-5p	-0.19	-0.23	0.57	2011
CALCRL	ENST00000392370.3	calcitonin receptor-like	18	2	1	1	0	0	0	0	0	0	mmu-miR-205-5p	-0.19	-0.51	0.86	2005, 2007, 2009, 2011
MGA	ENST00000219905.7	MGA, MAX dimerization protein	250	1	1	0	0	0	0	0	0	2	mmu-miR-205-5p	-0.19	-0.2	0.36	2007, 2009, 2011
TRAK2	ENST00000332624.3	trafficking protein, kinesin binding 2	353	1	1	0	0	0	0	0	0	2	mmu-miR-205-5p	-0.18	-0.18	0.26	2007, 2009, 2011
FRK	ENST00000606080.1	fyn-related kinase	37	1	1	0	0	0	0	0	0	1	mmu-miR-205-5p	-0.18	-0.43	0.98	2005, 2007, 2009, 2011
PAX9	ENST00000361487.6	paired box 9	53	1	1	0	0	0	0	0	0	1	mmu-miR-205-5p	-0.18	-0.21	0.38	2009, 2011
CAMKK1	ENST00000381769.2	calcium/calmodulin-dependent protein kinase kinase 1, alpha	34	1	1	0	0	1	0	1	0	0	mmu-miR-205-5p	-0.18	-0.18	0.21	2009, 2011
HERC3	ENST00000402738.1	HECT and RLD domain containing E3 ubiquitin protein ligase 3	50	1	1	0	0	0	0	0	0	0	mmu-miR-205-5p	-0.17	-0.21	0.23	2005, 2007, 2009, 2011
RAB9B	ENST00000243298.2	RAB9B, member RAS oncogene family	21	1	1	0	0	0	0	0	0	0	mmu-miR-205-5p	-0.15	-0.15	0.32	2011
ERBB4	ENST00000342788.4	v-erb-b2 avian erythroblastic leukemia viral oncogene homolog 4	27	1	1	0	0	2	0	0	2	1	mmu-miR-205-5p	-0.15	-0.19	0.84	2007, 2009, 2011
ARHGAP19-SLIT1	ENST00000453547.2	ARHGAP19-SLIT1 readthrough (NMD candidate)	15	1	1	0	0	3	0	2	1	2	mmu-miR-205-5p	-0.15	-0.15	< 0.1
LPCAT1	ENST00000283415.3	lysophosphatidylcholine acyltransferase 1	298	1	1	0	0	1	0	0	1	1	mmu-miR-205-5p	-0.15	-0.23	0.6	2007, 2009, 2011
MAGI2	ENST00000419488.1	membrane associated guanylate kinase, WW and PDZ domain containing 2	43	1	1	0	0	0	0	0	0	2	mmu-miR-205-5p	-0.15	-0.15	0.55	2007, 2009, 2011
RUNX2	ENST00000371432.3	runt-related transcription factor 2	105	1	1	0	0	0	0	0	0	0	mmu-miR-205-5p	-0.15	-0.15	0.51	2007, 2009, 2011
CPEB2	ENST00000538197.1	cytoplasmic polyadenylation element binding protein 2	367	1	1	0	0	1	0	1	0	0	mmu-miR-205-5p	-0.14	-0.14	0.56	2005, 2007, 2009, 2011
MED1	ENST00000300651.6	mediator complex subunit 1	87	2	1	1	0	1	0	1	0	1	mmu-miR-205-5p	-0.14	-0.15	0.12	2005, 2007, 2009, 2011
LPAR1	ENST00000374431.3	lysophosphatidic acid receptor 1	2111	1	1	0	0	0	0	0	0	0	mmu-miR-205-5p	-0.13	-0.15	0.4
CDC27	ENST00000066544.3	cell division cycle 27	438	1	1	0	0	1	0	0	1	1	mmu-miR-205-5p	-0.13	-0.2	0.55	2005, 2007, 2009, 2011
CREBRF	ENST00000540014.1	CREB3 regulatory factor	24	1	1	0	0	1	0	0	1	0	mmu-miR-205-5p	-0.13	-0.13	0.34	2011
DOK4	ENST00000566936.1	docking protein 4	183	1	1	0	0	0	0	0	0	0	mmu-miR-205-5p	-0.13	-0.24	0.4	2005, 2007, 2009, 2011
HOXC12	ENST00000243103.3	homeobox C12	5	1	1	0	0	0	0	0	0	0	mmu-miR-205-5p	-0.13	-0.13	0.57
PRKCE	ENST00000306156.3	protein kinase C, epsilon	164	1	1	0	0	0	0	0	0	2	mmu-miR-205-5p	-0.13	-0.13	0.14	2005, 2007, 2009, 2011
RAB11FIP1	ENST00000287263.4	RAB11 family interacting protein 1 (class I)	106	1	1	0	0	3	1	1	1	2	mmu-miR-205-5p	-0.12	-0.33	0.77	2005, 2007, 2009, 2011
FBXO22	ENST00000308275.3	F-box protein 22	1310	1	1	0	0	1	1	0	0	0	mmu-miR-205-5p	-0.12	-0.69	0.14	2005, 2007, 2009, 2011
ZCCHC14	ENST00000268616.4	zinc finger, CCHC domain containing 14	64	1	1	0	0	0	0	0	0	1	mmu-miR-205-5p	-0.11	-0.12	0.82	2005, 2007, 2009, 2011
MICAL2	ENST00000379612.3	microtubule associated monooxygenase, calponin and LIM domain containing 2	1742	1	1	0	0	0	0	0	0	0	mmu-miR-205-5p	-0.11	-0.11	0.41
TIGD2	ENST00000317005.2	tigger transposable element derived 2	132	1	1	0	0	1	0	0	1	0	mmu-miR-205-5p	-0.11	-0.76	< 0.1
RTTN	ENST00000454359.1	rotatin	288	1	1	0	0	2	0	0	2	0	mmu-miR-205-5p	-0.1	-0.1	ORF
SERTAD2	ENST00000313349.3	SERTA domain containing 2	119	1	1	0	0	0	0	0	0	0	mmu-miR-205-5p	-0.1	-0.13	0.47	2009, 2011
TP53INP1	ENST00000448464.2	tumor protein p53 inducible nuclear protein 1	39	1	1	0	0	0	0	0	0	1	mmu-miR-205-5p	-0.09	-0.26	0.29	2007, 2009, 2011
AP1G1	ENST00000299980.4	adaptor-related protein complex 1, gamma 1 subunit	436	1	1	0	0	0	0	0	0	1	mmu-miR-205-5p	-0.09	-0.09	0.14	2005, 2007, 2009, 2011
SP4	ENST00000222584.3	Sp4 transcription factor	131	1	1	0	0	0	0	0	0	2	mmu-miR-205-5p	-0.09	-0.09	0.15	2007, 2011
SYT14	ENST00000399639.2	synaptotagmin XIV	16	1	1	0	0	0	0	0	0	0	mmu-miR-205-5p	-0.09	-0.09	ORF
CSF1	ENST00000329608.6	colony stimulating factor 1 (macrophage)	290	1	1	0	0	0	0	0	0	0	mmu-miR-205-5p	-0.09	-0.09	0.52	2009, 2011
KLHL31	ENST00000370905.3	kelch-like family member 31	16	1	1	0	0	2	0	1	1	0	mmu-miR-205-5p	-0.09	-0.14	< 0.1	2009, 2011
KLF7	ENST00000423015.1	Kruppel-like factor 7 (ubiquitous)	737	2	1	1	0	1	0	0	1	0	mmu-miR-205-5p	-0.09	-0.13	0.24
ST6GALNAC5	ENST00000477717.1	ST6 (alpha-N-acetyl-neuraminyl-2,3-beta-galactosyl-1,3)-N-acetylgalactosaminide alpha-2,6-sialyltransferase 5	7	1	1	0	0	0	0	0	0	0	mmu-miR-205-5p	-0.09	-0.09	< 0.1
RBPMS2	ENST00000560606.1	RNA binding protein with multiple splicing 2	34	1	1	0	0	0	0	0	0	0	mmu-miR-205-5p	-0.09	-0.41	0.27	2007, 2009, 2011
STXBP6	ENST00000396700.1	syntaxin binding protein 6 (amisyn)	40	1	1	0	0	0	0	0	0	1	mmu-miR-205-5p	-0.08	-0.26	< 0.1
SCMH1	ENST00000361705.3	sex comb on midleg homolog 1 (Drosophila)	234	1	1	0	0	0	0	0	0	0	mmu-miR-205-5p	-0.08	-0.08	0.46	2005, 2007, 2009, 2011
LRCH3	ENST00000438796.2	leucine-rich repeats and calponin homology (CH) domain containing 3	399	1	1	0	0	1	1	0	0	2	mmu-miR-205-5p	-0.08	-0.34	0.65
ZEB1	ENST00000361642.5	zinc finger E-box binding homeobox 1	59	1	1	0	0	0	0	0	0	0	mmu-miR-205-5p	-0.08	-0.08	0.59	2011
KLHL15	ENST00000328046.8	kelch-like family member 15	42	1	1	0	0	1	0	0	1	1	mmu-miR-205-5p	-0.08	-0.08	0.34	2011
PTPRJ	ENST00000418331.2	protein tyrosine phosphatase, receptor type, J	145	1	1	0	0	1	0	0	1	0	mmu-miR-205-5p	-0.07	-0.08	0.52	2009, 2011
ETNK1	ENST00000266517.4	ethanolamine kinase 1	1047	1	1	0	0	0	0	0	0	2	mmu-miR-205-5p	-0.07	-0.41	0.73	2007, 2009, 2011
KSR1	ENST00000398988.3	kinase suppressor of ras 1	256	1	1	0	0	3	0	1	2	0	mmu-miR-205-5p	-0.07	-0.07	0.6
SNX27	ENST00000368843.3	sorting nexin family member 27	46	1	1	0	0	0	0	0	0	0	mmu-miR-205-5p	-0.07	-0.07	0.55	2005, 2007, 2009, 2011
ZDHHC9	ENST00000357166.6	zinc finger, DHHC-type containing 9	1203	1	1	0	0	0	0	0	0	1	mmu-miR-205-5p	-0.06	-0.27	0.39	2011
POU2F1	ENST00000367866.2	POU class 2 homeobox 1	83	1	1	0	0	0	0	0	0	2	mmu-miR-205-5p	-0.06	-0.07	0.45	2011
RAB30	ENST00000533486.1	RAB30, member RAS oncogene family	274	1	1	0	0	0	0	0	0	2	mmu-miR-205-5p	-0.06	-0.1	< 0.1
HIF1AN	ENST00000299163.6	hypoxia inducible factor 1, alpha subunit inhibitor	1545	1	1	0	0	1	0	0	1	4	mmu-miR-205-5p	-0.06	-0.16	0.98	2009, 2011
DST	ENST00000312431.6	dystonin	439	1	1	0	0	2	0	0	2	2	mmu-miR-205-5p	-0.05	-0.05	ORF
UBR1	ENST00000382177.2	ubiquitin protein ligase E3 component n-recognin 1	11	1	1	0	0	1	0	0	1	1	mmu-miR-205-5p	-0.05	-0.05	ORF
LIN9	ENST00000328205.5	lin-9 homolog (C. elegans)	139	1	1	0	0	0	0	0	0	0	mmu-miR-205-5p	-0.04	-0.23	0.53	2005, 2007, 2009, 2011
WNK2	ENST00000395475.2	WNK lysine deficient protein kinase 2	134	1	1	0	0	1	0	0	1	3	mmu-miR-205-5p	-0.04	-0.04	ORF
KMT2A	ENST00000534358.1	lysine (K)-specific methyltransferase 2A	1092	1	1	0	0	1	0	0	1	0	mmu-miR-205-5p	-0.04	-0.04	0.39	2011
COMMD10	ENST00000274458.4	COMM domain containing 10	108	1	1	0	0	0	0	0	0	1	mmu-miR-205-5p	-0.03	-0.28	< 0.1
KIF1B	ENST00000377086.1	kinesin family member 1B	234	1	1	0	0	0	0	0	0	1	mmu-miR-205-5p	-0.03	-0.03	< 0.1
QKI	ENST00000392127.2	QKI, KH domain containing, RNA binding	323	1	1	0	0	2*	0	0	1	0	mmu-miR-205-5p	-0.03	-0.04	0.13	2011
FAM155B	ENST00000252338.4	family with sequence similarity 155, member B	21	1	1	0	0	0	0	0	0	0	mmu-miR-205-5p	-0.03	-0.03	0.41	2005, 2007, 2009, 2011
CDC42BPB	ENST00000361246.2	CDC42 binding protein kinase beta (DMPK-like)	615	1	1	0	0	0	0	0	0	2	mmu-miR-205-5p	-0.03	-0.03	< 0.1	2005, 2007, 2009, 2011
NHSL2	ENST00000540800.1	NHS-like 2	5	1	1	0	0	0	0	0	0	0	mmu-miR-205-5p	-0.03	-0.03	< 0.1
PURG	ENST00000475541.1	purine-rich element binding protein G	29	1	1	0	0	0	0	0	0	0	mmu-miR-205-5p	-0.03	-0.07	< 0.1
HIPK3	ENST00000303296.4	homeodomain interacting protein kinase 3	933	1	1	0	0	0	0	0	0	0	mmu-miR-205-5p	-0.03	-0.03	0.24
STK10	ENST00000176763.5	serine/threonine kinase 10	655	1	1	0	0	0	0	0	0	0	mmu-miR-205-5p	-0.03	-0.29	0.49	2009, 2011
RPS6KA3	ENST00000379565.3	ribosomal protein S6 kinase, 90kDa, polypeptide 3	769	1	1	0	0	1	0	0	1	0	mmu-miR-205-5p	-0.03	-0.17	0.61	2005, 2007, 2009, 2011
HOXD13	ENST00000392539.3	homeobox D13	25	1	1	0	0	0	0	0	0	1	mmu-miR-205-5p	-0.02	-0.21	0.23
AGPS	ENST00000264167.4	alkylglycerone phosphate synthase	1610	1	1	0	0	1	0	1	0	3	mmu-miR-205-5p	-0.02	-0.1	< 0.1	2011
NUFIP2	ENST00000225388.4	nuclear fragile X mental retardation protein interacting protein 2	440	1	1	0	0	3	2	1	0	1	mmu-miR-205-5p	-0.02	-0.16	< 0.1	2011
SUSD1	ENST00000374263.3	sushi domain containing 1	68	1	1	0	0	1	1	0	0	2	mmu-miR-205-5p	-0.01	-0.1	0.32	2009, 2011
ITGB3BP	ENST00000371092.3	integrin beta 3 binding protein (beta3-endonexin)	1136	1	1	0	0	1	0	0	1	0	mmu-miR-205-5p	-0.01	-0.28	0.72
KNTC1	ENST00000537348.1	kinetochore associated 1	437	1	1	0	0	0	0	0	0	0	mmu-miR-205-5p	-0.01	-0.39	0.12
CHST7	ENST00000276055.3	carbohydrate (N-acetylglucosamine 6-O) sulfotransferase 7	406	1	1	0	0	0	0	0	0	0	mmu-miR-205-5p	-0.01	-0.23	0.16
C12orf29	ENST00000356891.3	chromosome 12 open reading frame 29	1322	1	1	0	0	0	0	0	0	0	mmu-miR-205-5p	0	-0.29	ORF	2007
PAPD5	ENST00000357464.3	PAP associated domain containing 5	152	1	1	0	0	0	0	0	0	0	mmu-miR-205-5p	0	-0.09	0.84	2007, 2009, 2011
SIPA1L1	ENST00000555818.1	signal-induced proliferation-associated 1 like 1	291	1	1	0	0	0	0	0	0	0	mmu-miR-205-5p	0	-0.15	0.74
CADM1	ENST00000452722.3	cell adhesion molecule 1	676	1	1	0	0	1	0	0	1	0	mmu-miR-205-5p	0	-0.23	0.8	2009, 2011
ZBTB20	ENST00000462705.1	zinc finger and BTB domain containing 20	5	1	1	0	0	3	0	2	1	3	mmu-miR-205-5p	0	-0.38	0.9
MTFR1L	ENST00000474295.1	mitochondrial fission regulator 1-like	3051	2	0	0	2	1	1	0	0	0	mmu-miR-205-5p	-0.73	-0.76	< 0.1
SH3GL3	ENST00000535412.1	SH3-domain GRB2-like 3	74	1	0	1	0	1	1	0	0	0	mmu-miR-205-5p	-0.63	-0.63	ORF
SELT	ENST00000471696.1	Selenoprotein T	538	1	0	1	0	1	1	0	0	0	mmu-miR-205-5p	-0.45	-0.45	0.74	2005, 2007, 2009, 2011
NDUFA4	ENST00000339600.5	NADH dehydrogenase (ubiquinone) 1 alpha subcomplex, 4, 9kDa	143	1	0	1	0	0	0	0	0	0	mmu-miR-205-5p	-0.43	-0.44	0.63	2005, 2007, 2009, 2011
C11orf34	ENST00000338832.2	chromosome 11 open reading frame 34	5	1	0	1	0	1	0	0	1	0	mmu-miR-205-5p	-0.4	-0.4	0.11	2011
DDX5	ENST00000225792.5	DEAD (Asp-Glu-Ala-Asp) box helicase 5	5537	1	0	1	0	0	0	0	0	0	mmu-miR-205-5p	-0.34	-0.34	0.36	2005, 2007, 2011
SGMS1	ENST00000361781.2	sphingomyelin synthase 1	100	2	0	1	1	0	0	0	0	0	mmu-miR-205-5p	-0.32	-0.33	0.28	2007
UBE2N	ENST00000550657.1	ubiquitin-conjugating enzyme E2N	321	1	0	1	0	1	0	0	1	2	mmu-miR-205-5p	-0.32	-0.35	0.55	2005, 2007, 2009, 2011
CRMP1	ENST00000324989.7	collapsin response mediator protein 1	252	1	0	0	1	1	0	1	0	0	mmu-miR-205-5p	-0.32	-0.32	0.15
LSAMP	ENST00000490035.2	limbic system-associated membrane protein	19	1	0	1	0	4	0	2	2	1	mmu-miR-205-5p	-0.31	-0.52	0.24	2011
ABHD17B	ENST00000333421.6	abhydrolase domain containing 17B	104	1	0	1	0	0	0	0	0	1	mmu-miR-205-5p	-0.3	-0.3	0.2	2007, 2009, 2011
DDX11	ENST00000251758.5	DEAD/H (Asp-Glu-Ala-Asp/His) box helicase 11	175	1	0	1	0	2	0	0	2	1	mmu-miR-205-5p	-0.27	-0.27	ORF
EPB41L4B	ENST00000374557.4	erythrocyte membrane protein band 4.1 like 4B	135	1	0	1	0	0	0	0	0	0	mmu-miR-205-5p	-0.27	-0.27	0.21
ANGPT2	ENST00000325203.5	angiopoietin 2	5	1	0	1	0	0	0	0	0	1	mmu-miR-205-5p	-0.27	-0.27	< 0.1	2011
ZEB2	ENST00000558170.2	zinc finger E-box binding homeobox 2	33	2	0	0	2	1	0	0	1	1	mmu-miR-205-5p	-0.27	-0.31	0.2	2007
SIAH1	ENST00000380006.2	siah E3 ubiquitin protein ligase 1	34	1	0	1	0	0	0	0	0	0	mmu-miR-205-5p	-0.27	-0.27	0.14	2007, 2011
LIMS2	ENST00000409286.1	LIM and senescent cell antigen-like domains 2	170	1	0	1	0	0	0	0	0	0	mmu-miR-205-5p	-0.26	-0.26	0.21	2007, 2009, 2011
SEPT5	ENST00000438754.2	septin 5	342	1	0	0	1	1	0	0	1	0	mmu-miR-205-5p	-0.26	-0.26	< 0.1
MICU3	ENST00000318063.5	mitochondrial calcium uptake family, member 3	9	1	0	1	0	1	0	0	1	0	mmu-miR-205-5p	-0.26	-0.26	0.13	2009
RAB11FIP2	ENST00000355624.3	RAB11 family interacting protein 2 (class I)	449	1	0	1	0	1	0	1	0	1	mmu-miR-205-5p	-0.26	-0.27	0.17	2009, 2011
ELF1	ENST00000442101.1	E74-like factor 1 (ets domain transcription factor)	466	1	0	0	1	1	0	1	0	2	mmu-miR-205-5p	-0.26	-0.27	0.16	2007, 2009, 2011
RBM47	ENST00000319592.4	RNA binding motif protein 47	264	2	0	1	1	0	0	0	0	0	mmu-miR-205-5p	-0.25	-0.25	0.37	2005, 2007, 2009, 2011
DGCR8	ENST00000383024.2	DGCR8 microprocessor complex subunit	1018	1	0	1	0	0	0	0	0	0	mmu-miR-205-5p	-0.25	-0.25	0.15	2005, 2007, 2011
WWC1	ENST00000265293.4	WW and C2 domain containing 1	43	1	0	1	0	0	0	0	0	1	mmu-miR-205-5p	-0.25	-0.3	0.91	2009, 2011
PHB	ENST00000300408.3	prohibitin	759	1	0	0	1	1	0	0	1	0	mmu-miR-205-5p	-0.24	-0.24	0.27	2005, 2007
REEP5	ENST00000545426.1	receptor accessory protein 5	4440	2	0	0	2	0	0	0	0	1	mmu-miR-205-5p	-0.23	-0.23	< 0.1
CNIH1	ENST00000395573.4	cornichon family AMPA receptor auxiliary protein 1	2182	1	0	1	0	0	0	0	0	1	mmu-miR-205-5p	-0.23	-0.24	< 0.1	2007
IRF2BPL	ENST00000238647.3	interferon regulatory factor 2 binding protein-like	2145	1	0	0	1	0	0	0	0	1	mmu-miR-205-5p	-0.23	-0.23	0.15	2005, 2007
FNBP1L	ENST00000370253.2	formin binding protein 1-like	219	1	0	0	1	0	0	0	0	1	mmu-miR-205-5p	-0.23	-0.23	0.15	2007
TBCEL	ENST00000422003.2	tubulin folding cofactor E-like	89	1	0	1	0	2	1	0	1	0	mmu-miR-205-5p	-0.23	-0.4	0.22
EAF1	ENST00000396842.2	ELL associated factor 1	63	1	0	1	0	0	0	0	0	1	mmu-miR-205-5p	-0.23	-0.24	< 0.1	2009, 2011
PSME3	ENST00000541124.1	proteasome (prosome, macropain) activator subunit 3 (PA28 gamma; Ki)	3605	1	0	0	1	2	0	1	1	0	mmu-miR-205-5p	-0.22	-0.29	< 0.1
MIER3	ENST00000381226.3	mesoderm induction early response 1, family member 3	112	1	0	0	1	1	1	0	0	2	mmu-miR-205-5p	-0.22	-0.25	0.15	2007, 2009, 2011
ERRFI1	ENST00000377482.5	ERBB receptor feedback inhibitor 1	3807	1	0	1	0	0	0	0	0	0	mmu-miR-205-5p	-0.22	-0.24	0.2	2007, 2009, 2011
HIATL1	ENST00000428393.2	hippocampus abundant transcript-like 1	767	1	0	1	0	0	0	0	0	0	mmu-miR-205-5p	-0.22	-0.22	< 0.1	2007, 2009, 2011
ZNF518B	ENST00000326756.3	zinc finger protein 518B	95	1	0	0	1	2	0	1	1	1	mmu-miR-205-5p	-0.22	-0.23	0.18	2005, 2007, 2009, 2011
E2F1	ENST00000343380.5	E2F transcription factor 1	479	1	0	1	0	0	0	0	0	0	mmu-miR-205-5p	-0.21	-0.21	0.19	2005, 2007, 2009, 2011
CCDC43	ENST00000457422.2	coiled-coil domain containing 43	36	1	0	0	1	2	0	1	1	0	mmu-miR-205-5p	-0.21	-0.21	0.17	2007, 2011
IL1R1	ENST00000410023.1	interleukin 1 receptor, type I	1713	1	0	1	0	0	0	0	0	0	mmu-miR-205-5p	-0.21	-0.21	0.13	2009, 2011
VASN	ENST00000304735.3	vasorin	192	2	0	1	1	1	0	1	0	1	mmu-miR-205-5p	-0.21	-0.46	0.49	2007, 2009, 2011
CCDC176	ENST00000394009.3	coiled-coil domain containing 176	61	1	0	0	1	1	0	0	1	1	mmu-miR-205-5p	-0.21	-0.21	< 0.1	2007
CLK3	ENST00000348245.3	CDC-like kinase 3	127	1	0	0	1	2	0	0	2	0	mmu-miR-205-5p	-0.2	-0.2	0.13
IVNS1ABP	ENST00000367498.3	influenza virus NS1A binding protein	2215	1	0	1	0	0	0	0	0	1	mmu-miR-205-5p	-0.2	-0.21	0.31	2005, 2007, 2009, 2011
RNF207	ENST00000377948.2	ring finger protein 207	5	2	0	0	2	0	0	0	0	0	mmu-miR-205-5p	-0.2	-0.2	ORF
FAM168A	ENST00000064778.4	family with sequence similarity 168, member A	68	2	0	0	2	6	0	3	3	4	mmu-miR-205-5p	-0.2	-0.29	0.31
TNR	ENST00000367674.2	tenascin R	5	1	0	0	1	3	0	0	3	3	mmu-miR-205-5p	-0.19	-0.19	0.35	2009, 2011
ZNF800	ENST00000393313.1	zinc finger protein 800	239	1	0	1	0	1	0	0	1	0	mmu-miR-205-5p	-0.19	-0.19	0.12	2007
TM2D3	ENST00000347970.3	TM2 domain containing 3	458	1	0	1	0	0	0	0	0	0	mmu-miR-205-5p	-0.19	-0.19	< 0.1	2011
NUP62CL	ENST00000372461.3	nucleoporin 62kDa C-terminal like	73	1	0	0	1	2	0	1	1	1	mmu-miR-205-5p	-0.19	-0.24	< 0.1
NCOA1	ENST00000405141.1	nuclear receptor coactivator 1	200	1	0	1	0	2	0	1	1	0	mmu-miR-205-5p	-0.19	-0.2	0.29	2009, 2011
GLIS3	ENST00000324333.10	GLIS family zinc finger 3	47	1	0	1	0	0	0	0	0	1	mmu-miR-205-5p	-0.18	-0.18	0.45	2007, 2009, 2011
BAMBI	ENST00000375533.3	BMP and activin membrane-bound inhibitor	515	1	0	0	1	0	0	0	0	3	mmu-miR-205-5p	-0.18	-0.18	0.16	2005, 2007, 2011
AFF1	ENST00000395146.4	AF4/FMR2 family, member 1	28	1	0	0	1	0	0	0	0	2	mmu-miR-205-5p	-0.18	-0.3	0.15	2009, 2011
FGF14	ENST00000376131.4	fibroblast growth factor 14	5	1	0	1	0	0	0	0	0	0	mmu-miR-205-5p	-0.18	-0.18	< 0.1
TSC22D1	ENST00000458659.2	TSC22 domain family, member 1	4146	1	0	1	0	0	0	0	0	1	mmu-miR-205-5p	-0.18	-0.2	< 0.1	2005, 2007
UBE2G1	ENST00000396981.2	ubiquitin-conjugating enzyme E2G 1	5620	1	0	1	0	0	0	0	0	1	mmu-miR-205-5p	-0.18	-0.21	0.12	2005, 2007, 2009, 2011
TMEM236	ENST00000377495.1	transmembrane protein 236	5	1	0	1	0	0	0	0	0	0	mmu-miR-205-5p	-0.18	-0.18	0.33	2009, 2011
ZNF597	ENST00000301744.4	zinc finger protein 597	159	1	0	1	0	2	0	0	2	2	mmu-miR-205-5p	-0.18	-0.23	0.23
KLF12	ENST00000377669.2	Kruppel-like factor 12	251	2	0	2	0	1	0	1	0	5	mmu-miR-205-5p	-0.18	-0.2	0.6	2005, 2007, 2009, 2011
NFIB	ENST00000397575.3	nuclear factor I/B	1149	4	0	2	2	0	0	0	0	3	mmu-miR-205-5p	-0.18	-0.2	0.56	2007, 2009, 2011
TMEM236	ENST00000480516.1		5	1	0	1	0	0	0	0	0	0	mmu-miR-205-5p	-0.17	-0.17	0.34
ZNF536	ENST00000355537.3	zinc finger protein 536	5	1	0	1	0	0	0	0	0	0	mmu-miR-205-5p	-0.17	-0.17	0.17	2005, 2007, 2009, 2011
P2RY1	ENST00000305097.3	purinergic receptor P2Y, G-protein coupled, 1	58	1	0	1	0	0	0	0	0	2	mmu-miR-205-5p	-0.17	-0.2	0.4
FGFRL1	ENST00000264748.6	fibroblast growth factor receptor-like 1	1114	1	0	0	1	0	0	0	0	0	mmu-miR-205-5p	-0.17	-0.17	0.15	2011
SEPT11	ENST00000264893.6	septin 11	515	1	0	1	0	0	0	0	0	2	mmu-miR-205-5p	-0.17	-0.18	0.43	2005, 2007, 2009, 2011
ERP29	ENST00000455836.1	endoplasmic reticulum protein 29	1210	1	0	0	1	0	0	0	0	0	mmu-miR-205-5p	-0.17	-0.17	ORF
VTI1B	ENST00000554659.1	vesicle transport through interaction with t-SNAREs 1B	264	1	0	0	1	2	0	1	1	0	mmu-miR-205-5p	-0.17	-0.2	0.15	2007
B4GALT6	ENST00000306851.5	UDP-Gal:betaGlcNAc beta 1,4- galactosyltransferase, polypeptide 6	146	1	0	1	0	0	0	0	0	0	mmu-miR-205-5p	-0.17	-0.17	0.36	2005, 2007, 2009, 2011
TXNRD1	ENST00000378070.4	thioredoxin reductase 1	1255	1	0	0	1	0	0	0	0	0	mmu-miR-205-5p	-0.16	-0.16	0.16	2009, 2011
JPH4	ENST00000356300.4	junctophilin 4	5	1	0	1	0	0	0	0	0	1	mmu-miR-205-5p	-0.16	-0.16	0.18	2005, 2007, 2009, 2011
TLK1	ENST00000431350.2	tousled-like kinase 1	200	1	0	1	0	0	0	0	0	2	mmu-miR-205-5p	-0.16	-0.2	0.29	2009, 2011
TM9SF3	ENST00000371142.4	transmembrane 9 superfamily member 3	1030	1	0	1	0	1	0	1	0	1	mmu-miR-205-5p	-0.16	-0.2	0.36	2007, 2009, 2011
COX4I1	ENST00000564903.1	cytochrome c oxidase subunit IV isoform 1	44	1	0	1	0	1	0	1	0	0	mmu-miR-205-5p	-0.16	-0.27	< 0.1
PPP1R1C	ENST00000409137.3	protein phosphatase 1, regulatory (inhibitor) subunit 1C	5	1	0	1	0	0	0	0	0	0	mmu-miR-205-5p	-0.16	-0.16	0.27
CASD1	ENST00000297273.4	CAS1 domain containing 1	270	1	0	1	0	0	0	0	0	0	mmu-miR-205-5p	-0.15	-0.19	0.28	2011
TTI1	ENST00000373448.2	TELO2 interacting protein 1	182	1	0	0	1	0	0	0	0	1	mmu-miR-205-5p	-0.15	-0.16	0.15	2005, 2007, 2011
RBFOX3	ENST00000583458.1	RNA binding protein, fox-1 homolog (C. elegans) 3	5	1	0	1	0	1	0	0	1	2	mmu-miR-205-5p	-0.15	-0.15	0.17	2007, 2009, 2011
PARD6B	ENST00000371610.2	par-6 family cell polarity regulator beta	277	1	0	0	1	1	0	1	0	0	mmu-miR-205-5p	-0.15	-0.16	0.16	2007, 2009, 2011
CDH19	ENST00000540086.1	cadherin 19, type 2	5	1	0	1	0	1	0	0	1	0	mmu-miR-205-5p	-0.15	-0.16	< 0.1
NUTF2	ENST00000219169.4	nuclear transport factor 2	222	1	0	0	1	1	0	0	1	1	mmu-miR-205-5p	-0.15	-0.16	0.16	2005, 2007
SLC24A2	ENST00000341998.2	solute carrier family 24 (sodium/potassium/calcium exchanger), member 2	5	1	0	0	1	2	1	0	1	0	mmu-miR-205-5p	-0.15	-0.15	0.17	2011
AC010336.1	ENST00000539278.1	Uncharacterized protein	8	1	0	1	0	0	0	0	0	0	mmu-miR-205-5p	-0.15	-0.15	ORF
C17orf97	ENST00000360127.6	chromosome 17 open reading frame 97	78	1	0	0	1	0	0	0	0	0	mmu-miR-205-5p	-0.15	-0.15	0.15	2011
SALL4	ENST00000217086.4	sal-like 4 (Drosophila)	155	1	0	1	0	0	0	0	0	0	mmu-miR-205-5p	-0.15	-0.15	0.38
GINS1	ENST00000429262.2	GINS complex subunit 1 (Psf1 homolog)	56	1	0	1	0	0	0	0	0	0	mmu-miR-205-5p	-0.14	-0.14	ORF
FAM104A	ENST00000581110.1	family with sequence similarity 104, member A	2724	1	0	0	1	2	0	1	1	1	mmu-miR-205-5p	-0.14	-0.27	< 0.1	2007
PPP3R1	ENST00000234310.3	protein phosphatase 3, regulatory subunit B, alpha	117	1	0	0	1	0	0	0	0	0	mmu-miR-205-5p	-0.14	-0.14	0.15	2009, 2011
ARFGEF1	ENST00000262215.3	ADP-ribosylation factor guanine nucleotide-exchange factor 1 (brefeldin A-inhibited)	70	1	0	0	1	0	0	0	0	0	mmu-miR-205-5p	-0.14	-0.18	0.16	2005, 2007
USP7	ENST00000344836.4	ubiquitin specific peptidase 7 (herpes virus-associated)	656	1	0	1	0	0	0	0	0	0	mmu-miR-205-5p	-0.14	-0.15	0.2	2009, 2011
STK3	ENST00000419617.2	serine/threonine kinase 3	25	1	0	0	1	0	0	0	0	0	mmu-miR-205-5p	-0.14	-0.14	0.15	2005, 2007, 2009, 2011
FAM120A	ENST00000333936.5	family with sequence similarity 120A	57	1	0	0	1	0	0	0	0	1	mmu-miR-205-5p	-0.13	-0.16	0.15	2007, 2009, 2011
ANO10	ENST00000414522.2	anoctamin 10	330	1	0	0	1	1	0	0	1	0	mmu-miR-205-5p	-0.13	-0.13	< 0.1
TEAD1	ENST00000361905.4	TEA domain family member 1 (SV40 transcriptional enhancer factor)	740	1	0	1	0	0	0	0	0	1	mmu-miR-205-5p	-0.13	-0.13	0.21	2005, 2007, 2009, 2011
AMOT	ENST00000304758.1	angiomotin	515	1	0	1	0	0	0	0	0	1	mmu-miR-205-5p	-0.13	-0.18	0.25	2005, 2007, 2009, 2011
EVA1C	ENST00000401402.3	eva-1 homolog C (C. elegans)	177	1	0	0	1	0	0	0	0	0	mmu-miR-205-5p	-0.13	-0.13	0.15	2005, 2007, 2009, 2011
PGAP3	ENST00000579146.1	post-GPI attachment to proteins 3	6	1	0	0	1	0	0	0	0	0	mmu-miR-205-5p	-0.13	-0.13	ORF
HNRNPH3	ENST00000265866.7	heterogeneous nuclear ribonucleoprotein H3 (2H9)	4505	1	0	0	1	0	0	0	0	0	mmu-miR-205-5p	-0.13	-0.13	0.15	2005, 2007, 2009, 2011
TNRC6C	ENST00000335749.4	trinucleotide repeat containing 6C	248	1	0	1	0	0	0	0	0	0	mmu-miR-205-5p	-0.12	-0.13	0.43	2011
FAM179A	ENST00000379558.4	family with sequence similarity 179, member A	21	1	0	1	0	1	0	0	1	6	mmu-miR-205-5p	-0.12	-0.59	0.28
GRB10	ENST00000398812.2	growth factor receptor-bound protein 10	1382	1	0	0	1	1	1	0	0	1	mmu-miR-205-5p	-0.12	-0.15	0.15	2009, 2011
MID1IP1	ENST00000336949.6	MID1 interacting protein 1	356	1	0	1	0	0	0	0	0	0	mmu-miR-205-5p	-0.12	-0.12	0.22	2005, 2007, 2009, 2011
AEBP2	ENST00000266508.9	AE binding protein 2	1228	1	0	0	1	1	0	0	1	1	mmu-miR-205-5p	-0.12	-0.12	0.22	2005, 2007, 2009, 2011
DGCR2	ENST00000545799.1	DiGeorge syndrome critical region gene 2	1754	1	0	1	0	0	0	0	0	2	mmu-miR-205-5p	-0.12	-0.12	< 0.1
LBH	ENST00000406087.1	limb bud and heart development	1956	1	0	0	1	0	0	0	0	1	mmu-miR-205-5p	-0.12	-0.12	ORF
BMF	ENST00000220446.4	Bcl2 modifying factor	179	1	0	0	1	0	0	0	0	1	mmu-miR-205-5p	-0.12	-0.13	0.15
UBIAD1	ENST00000376810.5	UbiA prenyltransferase domain containing 1	303	1	0	1	0	1	0	0	1	1	mmu-miR-205-5p	-0.12	-0.25	0.23	2011
NSF	ENST00000225282.8	N-ethylmaleimide-sensitive factor	86	1	0	0	1	0	0	0	0	0	mmu-miR-205-5p	-0.11	-0.13	0.15	2009, 2011
YES1	ENST00000577961.1	v-yes-1 Yamaguchi sarcoma viral oncogene homolog 1	168	1	0	1	0	0	0	0	0	0	mmu-miR-205-5p	-0.11	-0.12	0.19	2005, 2007, 2009, 2011
BCL6	ENST00000406870.2	B-cell CLL/lymphoma 6	20	1	0	0	1	0	0	0	0	1	mmu-miR-205-5p	-0.11	-0.11	0.15	2005, 2007
PHF17	ENST00000226319.6	PHD finger protein 17	1393	1	0	1	0	0	0	0	0	0	mmu-miR-205-5p	-0.11	-0.11	< 0.1	2007, 2009, 2011
SMAD1	ENST00000302085.4	SMAD family member 1	240	1	0	0	1	0	0	0	0	0	mmu-miR-205-5p	-0.11	-0.11	0.15	2005, 2007, 2009, 2011
PJA2	ENST00000361189.2	praja ring finger 2, E3 ubiquitin protein ligase	220	1	0	1	0	0	0	0	0	2	mmu-miR-205-5p	-0.11	-0.24	< 0.1	2005, 2007, 2009, 2011
NAA10	ENST00000370015.4	N(alpha)-acetyltransferase 10, NatA catalytic subunit	960	1	0	0	1	0	0	0	0	0	mmu-miR-205-5p	-0.11	-0.11	ORF
FAM84B	ENST00000304916.3	family with sequence similarity 84, member B	45	2	0	1	1	0	0	0	0	0	mmu-miR-205-5p	-0.11	-0.22	0.64	2007, 2009, 2011
BMPER	ENST00000297161.2	BMP binding endothelial regulator	723	1	0	0	1	0	0	0	0	0	mmu-miR-205-5p	-0.11	-0.11	0.16	2005, 2007, 2009, 2011
BEAN1	ENST00000299694.8	brain expressed, associated with NEDD4, 1	16	1	0	1	0	0	0	0	0	0	mmu-miR-205-5p	-0.1	-0.15	0.15	2011
NUDT18	ENST00000521807.2	nudix (nucleoside diphosphate linked moiety X)-type motif 18	40	1	0	0	1	0	0	0	0	0	mmu-miR-205-5p	-0.1	-0.1	ORF
C20orf194	ENST00000453730.2	chromosome 20 open reading frame 194	1083	2	0	1	1	0	0	0	0	1	mmu-miR-205-5p	-0.1	-0.1	< 0.1
VPS13B	ENST00000395996.1	vacuolar protein sorting 13 homolog B (yeast)	262	2	0	1	1	2	1	0	1	4	mmu-miR-205-5p	-0.1	-0.1	ORF
SOX7	ENST00000554914.1	Transcription factor SOX-7; Uncharacterized protein; cDNA FLJ58508, highly similar to Transcription factor SOX-7	47	1	0	0	1	0	0	0	0	1	mmu-miR-205-5p	-0.1	-0.11	0.16
GTF3C2	ENST00000359541.2	general transcription factor IIIC, polypeptide 2, beta 110kDa	981	1	0	1	0	1	0	0	1	0	mmu-miR-205-5p	-0.1	-0.16	0.14	2005, 2007, 2009, 2011
WDTC1	ENST00000319394.3	WD and tetratricopeptide repeats 1	137	1	0	0	1	1	1	0	0	0	mmu-miR-205-5p	-0.1	-0.28	0.15	2005, 2007, 2009, 2011
LYSMD4	ENST00000409796.1	LysM, putative peptidoglycan-binding, domain containing 4	1344	1	0	0	1	0	0	0	0	1	mmu-miR-205-5p	-0.1	-0.1	0.16	2011
SMIM14	ENST00000295958.5	small integral membrane protein 14	601	1	0	0	1	0	0	0	0	1	mmu-miR-205-5p	-0.1	-0.1	0.16	2007
RAN	ENST00000543796.1	RAN, member RAS oncogene family	1418	1	0	0	1	0	0	0	0	0	mmu-miR-205-5p	-0.1	-0.1	0.16	2009
DSC3	ENST00000434452.1	desmocollin 3	390	1	0	1	0	0	0	0	0	0	mmu-miR-205-5p	-0.1	-0.1	ORF
KIF26B	ENST00000366518.4	kinesin family member 26B	25	1	0	1	0	1	0	1	0	0	mmu-miR-205-5p	-0.1	-0.1	0.48	2007, 2011
ZSWIM4	ENST00000254323.2	zinc finger, SWIM-type containing 4	13	1	0	0	1	0	0	0	0	0	mmu-miR-205-5p	-0.1	-0.1	0.15	2007, 2011
UBE2E3	ENST00000410062.4	ubiquitin-conjugating enzyme E2E 3	15	1	0	0	1	0	0	0	0	2	mmu-miR-205-5p	-0.1	-0.12	0.15	2005, 2007
KLF3	ENST00000261438.5	Kruppel-like factor 3 (basic)	515	1	0	0	1	0	0	0	0	0	mmu-miR-205-5p	-0.09	-0.12	0.15	2009, 2011
SIK2	ENST00000304987.3	salt-inducible kinase 2	378	1	0	0	1	1	0	0	1	1	mmu-miR-205-5p	-0.09	-0.11	0.18	2011
ITGA5	ENST00000293379.4	integrin, alpha 5 (fibronectin receptor, alpha polypeptide)	5599	1	0	0	1	0	0	0	0	2	mmu-miR-205-5p	-0.09	-0.09	0.15	2009, 2011
AC012215.1	ENST00000437887.1	Uncharacterized protein	31	1	0	0	1	1	0	1	0	0	mmu-miR-205-5p	-0.09	-0.1	0.15
DNM3	ENST00000367731.1	dynamin 3	59	1	0	0	1	2	1	0	1	1	mmu-miR-205-5p	-0.09	-0.18	0.15	2007, 2011
PPP1R3A	ENST00000284601.3	protein phosphatase 1, regulatory subunit 3A	5	1	0	0	1	0	0	0	0	0	mmu-miR-205-5p	-0.09	-0.09	0.15	2005, 2007
PROX1	ENST00000366958.4	prospero homeobox 1	131	1	0	1	0	0	0	0	0	0	mmu-miR-205-5p	-0.09	-0.09	0.19
FBXL3	ENST00000355619.5	F-box and leucine-rich repeat protein 3	842	1	0	0	1	0	0	0	0	1	mmu-miR-205-5p	-0.09	-0.1	0.15
UBFD1	ENST00000395878.3	ubiquitin family domain containing 1	6826	1	0	0	1	0	0	0	0	0	mmu-miR-205-5p	-0.09	-0.09	0.15	2007, 2009, 2011
STRBP	ENST00000447404.2	spermatid perinuclear RNA binding protein	575	1	0	0	1	0	0	0	0	1	mmu-miR-205-5p	-0.09	-0.09	0.15	2005, 2007, 2009, 2011
ACBD5	ENST00000396271.3	acyl-CoA binding domain containing 5	77	1	0	0	1	0	0	0	0	0	mmu-miR-205-5p	-0.09	-0.09	0.15
IL6ST	ENST00000381287.4	interleukin 6 signal transducer (gp130, oncostatin M receptor)	213	1	0	1	0	2	0	0	2	2	mmu-miR-205-5p	-0.09	-0.09	< 0.1
GBA	ENST00000368373.3	glucosidase, beta, acid	27	1	0	1	0	1	0	0	1	0	mmu-miR-205-5p	-0.09	-0.11	0.26
RAB14	ENST00000373840.4	RAB14, member RAS oncogene family	586	1	0	0	1	0	0	0	0	0	mmu-miR-205-5p	-0.09	-0.14	0.15	2005, 2007, 2011
AXIN2	ENST00000307078.5	axin 2	86	1	0	0	1	0	0	0	0	0	mmu-miR-205-5p	-0.09	-0.09	0.15	2011
SPOPL	ENST00000280098.4	speckle-type POZ protein-like	216	1	0	1	0	0	0	0	0	0	mmu-miR-205-5p	-0.08	-0.1	0.11	2009, 2011
HMGB1	ENST00000399489.1	high mobility group box 1	800	1	0	0	1	1	0	1	0	0	mmu-miR-205-5p	-0.08	-0.23	0.16	2005, 2007
ETF1	ENST00000499810.2	eukaryotic translation termination factor 1	31	1	0	1	0	1	0	0	1	0	mmu-miR-205-5p	-0.08	-0.09	0.19	2005, 2007
GALNT3	ENST00000392701.3	UDP-N-acetyl-alpha-D-galactosamine:polypeptide N-acetylgalactosaminyltransferase 3 (GalNAc-T3)	40	1	0	1	0	0	0	0	0	0	mmu-miR-205-5p	-0.08	-0.08	< 0.1
HOXD9	ENST00000249499.6	homeobox D9	78	1	0	1	0	1	0	0	1	0	mmu-miR-205-5p	-0.08	-0.16	0.18
SVIP	ENST00000354193.4	small VCP/p97-interacting protein	521	1	0	0	1	2	0	1	1	1	mmu-miR-205-5p	-0.08	-0.4	0.18
PAFAH1B1	ENST00000397195.5	platelet-activating factor acetylhydrolase 1b, regulatory subunit 1 (45kDa)	1570	1	0	1	0	1	0	1	0	0	mmu-miR-205-5p	-0.08	-0.13	< 0.1	2005, 2007
UNC5D	ENST00000287272.2	unc-5 homolog D (C. elegans)	37	1	0	0	1	2	0	2	0	1	mmu-miR-205-5p	-0.08	-0.08	0.15
KAZN	ENST00000422387.2	kazrin, periplakin interacting protein	34	1	0	0	1	0	0	0	0	0	mmu-miR-205-5p	-0.07	-0.21	0.16	2011
SRGAP1	ENST00000355086.3	SLIT-ROBO Rho GTPase activating protein 1	64	1	0	1	0	3	0	1	2	0	mmu-miR-205-5p	-0.07	-0.1	0.13	2011
PPP1R13B	ENST00000423488.2	protein phosphatase 1, regulatory subunit 13B	105	1	0	1	0	0	0	0	0	0	mmu-miR-205-5p	-0.07	-0.07	ORF
ELAVL4	ENST00000371824.1	ELAV like neuron-specific RNA binding protein 4	5	1	0	0	1	0	0	0	0	1	mmu-miR-205-5p	-0.07	-0.07	0.15
TOR1AIP2	ENST00000367612.3	torsin A interacting protein 2	569	1	0	0	1	0	0	0	0	0	mmu-miR-205-5p	-0.07	-0.11	0.15	2011
TCEA2	ENST00000395053.3	transcription elongation factor A (SII), 2	181	1	0	0	1	0	0	0	0	1	mmu-miR-205-5p	-0.07	-0.07	< 0.1
BEND4	ENST00000504360.1	BEN domain containing 4	187	1	0	1	0	1	0	1	0	3	mmu-miR-205-5p	-0.07	-0.07	< 0.1
LUC7L3	ENST00000505658.1	LUC7-like 3 (S. cerevisiae)	2970	1	0	0	1	1	1	0	0	1	mmu-miR-205-5p	-0.07	-0.25	< 0.1	2007, 2011
SNN	ENST00000329565.5	stannin	663	1	0	0	1	0	0	0	0	0	mmu-miR-205-5p	-0.07	-0.07	0.15	2009, 2011
CTNNA1	ENST00000518825.1	catenin (cadherin-associated protein), alpha 1, 102kDa	2009	1	0	1	0	0	0	0	0	1	mmu-miR-205-5p	-0.07	-0.07	ORF
NFAT5	ENST00000354436.2	nuclear factor of activated T-cells 5, tonicity-responsive	128	3	0	2	1	1	0	0	1	2	mmu-miR-205-5p	-0.07	-0.09	0.79	2005, 2007, 2009, 2011
DSC1	ENST00000257197.3	desmocollin 1	7	1	0	1	0	0	0	0	0	0	mmu-miR-205-5p	-0.07	-0.07	ORF
AGO1	ENST00000373204.4	argonaute RISC catalytic component 1	402	1	0	0	1	2	0	1	1	1	mmu-miR-205-5p	-0.07	-0.07	0.15
FAM73B	ENST00000277475.5	family with sequence similarity 73, member B	651	1	0	0	1	0	0	0	0	0	mmu-miR-205-5p	-0.06	-0.06	ORF
SAE1	ENST00000392776.3	SUMO1 activating enzyme subunit 1	87	1	0	1	0	0	0	0	0	0	mmu-miR-205-5p	-0.06	-0.06	ORF
WWC2	ENST00000403733.3	WW and C2 domain containing 2	717	1	0	1	0	0	0	0	0	2	mmu-miR-205-5p	-0.06	-0.07	0.39	2007, 2009, 2011
CCDC93	ENST00000376300.2	coiled-coil domain containing 93	395	1	0	1	0	1	0	0	1	2	mmu-miR-205-5p	-0.06	-0.21	0.16	2007, 2009, 2011
HNRNPK	ENST00000376281.4	heterogeneous nuclear ribonucleoprotein K	124	1	0	0	1	0	0	0	0	0	mmu-miR-205-5p	-0.06	-0.06	0.16	2005, 2007, 2009, 2011
DDX6	ENST00000264018.4	DEAD (Asp-Glu-Ala-Asp) box helicase 6	11	1	0	1	0	0	0	0	0	0	mmu-miR-205-5p	-0.06	-0.11	0.13	2005, 2007, 2009, 2011
EREG	ENST00000244869.2	epiregulin	5	1	0	0	1	1	0	0	1	1	mmu-miR-205-5p	-0.06	-0.06	0.16	2005, 2007, 2009, 2011
ZHX3	ENST00000309060.3	zinc fingers and homeoboxes 3	131	1	0	0	1	0	0	0	0	2	mmu-miR-205-5p	-0.05	-0.05	< 0.1	2007, 2009, 2011
TNRC6B	ENST00000335727.9	trinucleotide repeat containing 6B	69	1	0	0	1	1	0	1	0	3	mmu-miR-205-5p	-0.05	-0.07	0.15	2007, 2009, 2011
KAT7	ENST00000259021.4	K(lysine) acetyltransferase 7	48	1	0	0	1	2	1	1	0	0	mmu-miR-205-5p	-0.05	-0.14	0.16
NHS	ENST00000380060.3	Nance-Horan syndrome (congenital cataracts and dental anomalies)	72	1	0	1	0	1	1	0	0	0	mmu-miR-205-5p	-0.05	-0.05	< 0.1	2005, 2007
PFKFB3	ENST00000536985.1	6-phosphofructo-2-kinase/fructose-2,6-biphosphatase 3	29	1	0	0	1	0	0	0	0	0	mmu-miR-205-5p	-0.05	-0.05	ORF
PRKCA	ENST00000413366.3	protein kinase C, alpha	726	1	0	1	0	3	1	2	0	2	mmu-miR-205-5p	-0.05	-0.09	< 0.1
MSL2	ENST00000309993.2	male-specific lethal 2 homolog (Drosophila)	175	1	0	1	0	0	0	0	0	0	mmu-miR-205-5p	-0.05	-0.05	0.1	2007
DDX52	ENST00000349699.2	DEAD (Asp-Glu-Ala-Asp) box polypeptide 52	865	1	0	0	1	0	0	0	0	0	mmu-miR-205-5p	-0.05	-0.09	0.16	2011
IPO7	ENST00000379719.3	importin 7	1331	1	0	1	0	0	0	0	0	2	mmu-miR-205-5p	-0.05	-0.05	0.32	2005, 2007, 2009, 2011
CLCN6	ENST00000312413.6	chloride channel, voltage-sensitive 6	227	1	0	1	0	1	0	1	0	0	mmu-miR-205-5p	-0.05	-0.05	< 0.1
KPNA1	ENST00000344337.6	karyopherin alpha 1 (importin alpha 5)	1030	1	0	0	1	2	1	1	0	0	mmu-miR-205-5p	-0.05	-0.15	0.15	2009, 2011
TRPS1	ENST00000395715.3	trichorhinophalangeal syndrome I	94	1	0	1	0	1	0	0	1	0	mmu-miR-205-5p	-0.05	-0.06	0.18	2005, 2007, 2009, 2011
PHYHIPL	ENST00000373880.4	phytanoyl-CoA 2-hydroxylase interacting protein-like	26	1	0	1	0	0	0	0	0	0	mmu-miR-205-5p	-0.04	-0.12	< 0.1	2005, 2007
SMAD5	ENST00000545279.1	SMAD family member 5	225	1	0	0	1	0	0	0	0	0	mmu-miR-205-5p	-0.04	-0.06	0.15	2011
CDC20B	ENST00000334206.5	cell division cycle 20B	5	1	0	0	1	0	0	0	0	0	mmu-miR-205-5p	-0.04	-0.04	ORF
ACTB	ENST00000331789.5	actin, beta	176	1	0	1	0	0	0	0	0	1	mmu-miR-205-5p	-0.04	-0.16	< 0.1
MTRF1L	ENST00000367231.5	mitochondrial translational release factor 1-like	7	1	0	0	1	0	0	0	0	0	mmu-miR-205-5p	-0.04	-0.04	ORF
ATP7A	ENST00000343533.5	ATPase, Cu++ transporting, alpha polypeptide	141	1	0	1	0	0	0	0	0	1	mmu-miR-205-5p	-0.04	-0.04	0.14	2005, 2007, 2009, 2011
SLC4A4	ENST00000340595.3	solute carrier family 4 (sodium bicarbonate cotransporter), member 4	400	1	0	0	1	0	0	0	0	0	mmu-miR-205-5p	-0.04	-0.04	0.15	2011
XPO4	ENST00000400602.2	exportin 4	718	1	0	1	0	3	0	1	2	0	mmu-miR-205-5p	-0.04	-0.1	0.23	2009, 2011
SEMA4C	ENST00000305476.5	sema domain, immunoglobulin domain (Ig), transmembrane domain (TM) and short cytoplasmic domain, (semaphorin) 4C	31	1	0	1	0	0	0	0	0	0	mmu-miR-205-5p	-0.04	-0.04	0.16	2007, 2011
CMTM4	ENST00000394106.2	CKLF-like MARVEL transmembrane domain containing 4	22	1	0	0	1	2	0	1	1	1	mmu-miR-205-5p	-0.04	-0.12	0.15	2011
GTDC1	ENST00000392869.2	glycosyltransferase-like domain containing 1	241	1	0	1	0	1	0	0	1	1	mmu-miR-205-5p	-0.04	-0.17	0.31
XIRP2	ENST00000409195.1	xin actin-binding repeat containing 2	5	1	0	1	0	1	0	0	1	0	mmu-miR-205-5p	-0.03	-0.03	ORF
MAGI1	ENST00000330909.8	membrane associated guanylate kinase, WW and PDZ domain containing 1	258	1	0	1	0	0	0	0	0	0	mmu-miR-205-5p	-0.03	-0.08	0.2	2007, 2009
PSD3	ENST00000327040.8	pleckstrin and Sec7 domain containing 3	133	1	0	0	1	2	1	0	1	4	mmu-miR-205-5p	-0.03	-0.1	0.16	2009, 2011
ABCA9	ENST00000370732.2	ATP-binding cassette, sub-family A (ABC1), member 9	5	1	0	1	0	0	0	0	0	0	mmu-miR-205-5p	-0.03	-0.03	ORF
SLC30A7	ENST00000370112.4	solute carrier family 30 (zinc transporter), member 7	204	1	0	1	0	1	0	1	0	1	mmu-miR-205-5p	-0.03	-0.11	< 0.1	2011
TIAL1	ENST00000369093.2	TIA1 cytotoxic granule-associated RNA binding protein-like 1	1342	1	0	0	1	0	0	0	0	0	mmu-miR-205-5p	-0.03	-0.03	0.16	2009, 2011
LDB3	ENST00000542786.1	LIM domain binding 3	33	1	0	0	1	0	0	0	0	1	mmu-miR-205-5p	-0.03	-0.03	ORF
HMX3	ENST00000357878.5	H6 family homeobox 3	9	1	0	0	1	0	0	0	0	0	mmu-miR-205-5p	-0.03	-0.07	0.16
SEPT3	ENST00000396425.3	septin 3	241	1	0	1	0	1	0	0	1	0	mmu-miR-205-5p	-0.03	-0.03	< 0.1
RARA	ENST00000425707.3	retinoic acid receptor, alpha	560	1	0	0	1	0	0	0	0	2	mmu-miR-205-5p	-0.03	-0.1	0.15	2005, 2007, 2009, 2011
RNF4	ENST00000511859.1	ring finger protein 4	33	1	0	0	1	1	0	0	1	1	mmu-miR-205-5p	-0.03	-0.04	0.27	2005, 2007, 2009, 2011
MTMR4	ENST00000579925.1	myotubularin related protein 4	150	1	0	1	0	0	0	0	0	2	mmu-miR-205-5p	-0.03	-0.03	< 0.1	2005, 2007
MAP3K9	ENST00000554752.2	mitogen-activated protein kinase kinase kinase 9	44	1	0	0	1	1	0	1	0	1	mmu-miR-205-5p	-0.03	-0.03	0.15
PTPRG	ENST00000474889.1	protein tyrosine phosphatase, receptor type, G	696	1	0	1	0	0	0	0	0	1	mmu-miR-205-5p	-0.03	-0.03	0.27
AGPAT6	ENST00000396987.3	1-acylglycerol-3-phosphate O-acyltransferase 6	474	1	0	0	1	0	0	0	0	0	mmu-miR-205-5p	-0.03	-0.06	0.15	2011
NSUN5	ENST00000428206.1	NOP2/Sun domain family, member 5	28	1	0	0	1	0	0	0	0	0	mmu-miR-205-5p	-0.03	-0.15	0.16	2011
SPRY1	ENST00000394339.2	sprouty homolog 1, antagonist of FGF signaling (Drosophila)	150	1	0	0	1	0	0	0	0	2	mmu-miR-205-5p	-0.03	-0.05	0.16	2011
MAPK3	ENST00000403394.1	mitogen-activated protein kinase 3	271	1	0	0	1	0	0	0	0	0	mmu-miR-205-5p	-0.02	-0.02	ORF	2007
SPG11	ENST00000427534.2	spastic paraplegia 11 (autosomal recessive)	28	1	0	0	1	0	0	0	0	0	mmu-miR-205-5p	-0.02	-0.02	ORF
DOCK11	ENST00000276204.6	dedicator of cytokinesis 11	40	1	0	0	1	0	0	0	0	1	mmu-miR-205-5p	-0.02	-0.18	0.15
MAGI3	ENST00000307546.9	membrane associated guanylate kinase, WW and PDZ domain containing 3	70	1	0	1	0	0	0	0	0	0	mmu-miR-205-5p	-0.02	-0.02	0.28	2009, 2011
PDE7A	ENST00000401827.3	phosphodiesterase 7A	84	1	0	0	1	0	0	0	0	2	mmu-miR-205-5p	-0.02	-0.02	0.16
SCN2A	ENST00000375437.2	sodium channel, voltage-gated, type II, alpha subunit	7	1	0	1	0	0	0	0	0	1	mmu-miR-205-5p	-0.02	-0.02	0.13
ZNF609	ENST00000326648.3	zinc finger protein 609	103	1	0	1	0	0	0	0	0	1	mmu-miR-205-5p	-0.02	-0.02	< 0.1	2007, 2009, 2011
FAT3	ENST00000298047.6	FAT atypical cadherin 3	30	1	0	1	0	0	0	0	0	0	mmu-miR-205-5p	-0.02	-0.02	< 0.1	2009
SLK	ENST00000335753.4	STE20-like kinase	260	1	0	1	0	0	0	0	0	0	mmu-miR-205-5p	-0.02	-0.02	< 0.1
PAPLN	ENST00000381166.3	papilin, proteoglycan-like sulfated glycoprotein	78	1	0	1	0	0	0	0	0	0	mmu-miR-205-5p	-0.02	-0.02	< 0.1	2005, 2007, 2011
DDR1	ENST00000446312.1	discoidin domain receptor tyrosine kinase 1	195	1	0	0	1	1	0	0	1	0	mmu-miR-205-5p	-0.02	-0.02	ORF
TRAM2	ENST00000182527.3	translocation associated membrane protein 2	2774	1	0	0	1	1	0	0	1	2	mmu-miR-205-5p	-0.02	-0.02	0.2	2009, 2011
TBC1D13	ENST00000372648.5	TBC1 domain family, member 13	2204	1	0	1	0	0	0	0	0	2	mmu-miR-205-5p	-0.02	-0.02	< 0.1
NR6A1	ENST00000487099.2	nuclear receptor subfamily 6, group A, member 1	1082	1	0	0	1	1	0	0	1	1	mmu-miR-205-5p	-0.02	-0.02	0.16
XRN1	ENST00000264951.4	5'-3' exoribonuclease 1	612	1	0	0	1	1	0	0	1	1	mmu-miR-205-5p	-0.02	-0.02	0.15	2009, 2011
TNPO1	ENST00000337273.5	transportin 1	2041	2	0	1	1	0	0	0	0	1	mmu-miR-205-5p	-0.02	-0.03	0.2	2007, 2009, 2011
PRDM16	ENST00000511072.1	PR domain containing 16	64	1	0	0	1	1	0	0	1	1	mmu-miR-205-5p	-0.02	-0.03	0.18	2009, 2011
ARMC8	ENST00000469044.1	armadillo repeat containing 8	398	1	0	1	0	0	0	0	0	0	mmu-miR-205-5p	-0.02	-0.12	< 0.1
MPRIP	ENST00000341712.4	myosin phosphatase Rho interacting protein	521	1	0	0	1	0	0	0	0	1	mmu-miR-205-5p	-0.02	-0.02	< 0.1
RBM12	ENST00000374114.3	RNA binding motif protein 12	431	1	0	1	0	0	0	0	0	0	mmu-miR-205-5p	-0.01	-0.08	< 0.1
UBQLN2	ENST00000338222.5	ubiquilin 2	70	1	0	0	1	0	0	0	0	0	mmu-miR-205-5p	-0.01	-0.01	0.15
NR3C2	ENST00000344721.4	nuclear receptor subfamily 3, group C, member 2	425	1	0	0	1	0	0	0	0	1	mmu-miR-205-5p	-0.01	-0.01	0.15	2005, 2007, 2009, 2011
HDX	ENST00000297977.5	highly divergent homeobox	20	1	0	0	1	0	0	0	0	0	mmu-miR-205-5p	-0.01	-0.01	0.15
IPPK	ENST00000287996.3	inositol 1,3,4,5,6-pentakisphosphate 2-kinase	211	1	0	1	0	1	0	0	1	1	mmu-miR-205-5p	-0.01	-0.19	0.39	2009, 2011
TNS1	ENST00000171887.4	tensin 1	591	1	0	0	1	0	0	0	0	2	mmu-miR-205-5p	-0.01	-0.01	0.15	2011
ANK2	ENST00000357077.4	ankyrin 2, neuronal	133	1	0	0	1	0	0	0	0	0	mmu-miR-205-5p	-0.01	-0.01	ORF	2011
FAM208A	ENST00000493960.2	family with sequence similarity 208, member A	60	1	0	0	1	0	0	0	0	0	mmu-miR-205-5p	-0.01	-0.01	ORF
SEH1L	ENST00000262124.11	SEH1-like (S. cerevisiae)	632	1	0	1	0	0	0	0	0	0	mmu-miR-205-5p	-0.01	-0.02	ORF
GPATCH2L	ENST00000553588.1	G patch domain containing 2-like	96	1	0	0	1	0	0	0	0	0	mmu-miR-205-5p	-0.01	-0.01	0.16
MBNL3	ENST00000370839.3	muscleblind-like splicing regulator 3	593	1	0	0	1	0	0	0	0	1	mmu-miR-205-5p	-0.01	-0.01	0.16	2011
HNRNPR	ENST00000478691.1	heterogeneous nuclear ribonucleoprotein R	6629	1	0	1	0	1	0	0	1	0	mmu-miR-205-5p	-0.01	-0.17	0.11
SECISBP2L	ENST00000559471.1	SECIS binding protein 2-like	161	1	0	0	1	0	0	0	0	0	mmu-miR-205-5p	-0.01	-0.03	0.16	2011
LRP6	ENST00000261349.4	low density lipoprotein receptor-related protein 6	157	1	0	0	1	0	0	0	0	1	mmu-miR-205-5p	-0.01	-0.01	0.16	2009, 2011
ARID1A	ENST00000324856.7	AT rich interactive domain 1A (SWI-like)	31	1	0	0	1	0	0	0	0	0	mmu-miR-205-5p	-0.01	-0.01	0.15	2005, 2007
WAC	ENST00000375664.4	WW domain containing adaptor with coiled-coil	322	1	0	0	1	0	0	0	0	0	mmu-miR-205-5p	0	-0.03	0.15
DMXL1	ENST00000311085.8	Dmx-like 1	136	1	0	1	0	0	0	0	0	0	mmu-miR-205-5p	0	-0.06	0.45	2005, 2007
TMEM136	ENST00000529187.1	transmembrane protein 136	344	1	0	1	0	0	0	0	0	0	mmu-miR-205-5p	0	-0.14	0.17	2011
GGCX	ENST00000233838.4	gamma-glutamyl carboxylase	254	2	0	1	1	0	0	0	0	0	mmu-miR-205-5p	0	-0.2	0.75
KHNYN	ENST00000251343.5	KH and NYN domain containing	421	1	0	1	0	0	0	0	0	2	mmu-miR-205-5p	0	-0.02	< 0.1	2007
EIF4E	ENST00000450253.2	eukaryotic translation initiation factor 4E	876	1	0	0	1	1	0	1	0	0	mmu-miR-205-5p	0	-0.12	0.16	2005, 2007, 2011
KCNMB4	ENST00000258111.4	potassium large conductance calcium-activated channel, subfamily M, beta member 4	486	1	0	0	1	0	0	0	0	0	mmu-miR-205-5p	0	-0.04	0.15
TM9SF2	ENST00000376387.4	transmembrane 9 superfamily member 2	5046	2	0	0	2	1	0	0	1	0	mmu-miR-205-5p	0	-0.28	0.29
CCDC85C	ENST00000380243.4	coiled-coil domain containing 85C	86	1	0	0	1	0	0	0	0	0	mmu-miR-205-5p	0	-0.01	0.15	2011
TACO1	ENST00000258975.6	translational activator of mitochondrially encoded cytochrome c oxidase I	755	1	0	0	1	0	0	0	0	0	mmu-miR-205-5p	0	-0.05	0.16
CSNK1A1	ENST00000261798.5	casein kinase 1, alpha 1	769	1	0	1	0	0	0	0	0	0	mmu-miR-205-5p	0	-0.14	0.16
RUNX3	ENST00000399916.1	runt-related transcription factor 3	378	1	0	0	1	0	0	0	0	0	mmu-miR-205-5p	0	-0.06	0.15	2011
CEP128	ENST00000281129.3	centrosomal protein 128kDa	280	1	0	1	0	0	0	0	0	2	mmu-miR-205-5p	0	-0.03	< 0.1
S1PR1	ENST00000305352.6	sphingosine-1-phosphate receptor 1	251	1	0	0	1	1	0	1	0	0	mmu-miR-205-5p	0	-0.06	0.17
CSNK2A1	ENST00000349736.5	casein kinase 2, alpha 1 polypeptide	1927	1	0	1	0	0	0	0	0	0	mmu-miR-205-5p	0	-0.08	< 0.1
ALDH6A1	ENST00000553458.1	aldehyde dehydrogenase 6 family, member A1	196	1	0	1	0	0	0	0	0	0	mmu-miR-205-5p	0	-0.04	ORF
EXT1	ENST00000378204.2	exostosin glycosyltransferase 1	694	1	0	0	1	1	0	0	1	1	mmu-miR-205-5p	0	-0.06	0.15
FAM216B	ENST00000537894.1	family with sequence similarity 216, member B	5	1	0	1	0	1	0	1	0	0	mmu-miR-205-5p	0	-0.13	0.22
EPS8	ENST00000543523.1	epidermal growth factor receptor pathway substrate 8	2643	1	0	1	0	1	0	1	0	1	mmu-miR-205-5p	0	-0.1	0.18
DGCR14	ENST00000252137.6	DiGeorge syndrome critical region gene 14	269	1	0	0	1	0	0	0	0	1	mmu-miR-205-5p	0	-0.01	< 0.1	2007
AP1AR	ENST00000274000.5	adaptor-related protein complex 1 associated regulatory protein	89	1	0	0	1	1	0	1	0	2	mmu-miR-205-5p	0	-0.13	0.16	2005, 2007, 2011

## Sheet: miR-133a-3p
Ortholog of target gene	Representative transcript	Gene name	3P-seq tags + 5	Conserved sites total	Conserved 8mer sites	Conserved 7mer-m8 sites	Conserved 7mer-A1 sites	Poorly conserved sites total	Poorly conserved 8mer sites	Poorly conserved 7mer-m8 sites	Poorly conserved 7mer-A1 sites	6mer sites	Representative miRNA	Cumulative weighted context++ score	Total context++ score	Aggregate PCT	Previous TargetScan publication(s)
GABPB2	ENST00000368918.3	GA binding protein transcription factor, beta subunit 2	35	2	2	0	0	1	0	1	0	0	mmu-miR-133c	-0.68	-1.12	0.82	2009, 2011
ST8SIA3	ENST00000324000.3	ST8 alpha-N-acetyl-neuraminide alpha-2,8-sialyltransferase 3	5	2	2	0	0	0	0	0	0	1	mmu-miR-133c	-0.61	-0.61	0.59	2009, 2011
ENC1	ENST00000302351.4	ectodermal-neural cortex 1 (with BTB domain)	57	2	2	0	0	0	0	0	0	0	mmu-miR-133c	-0.51	-0.63	0.3	2009, 2011
CDYL2	ENST00000570137.2	chromodomain protein, Y-like 2	239	2	2	0	0	0	0	0	0	2	mmu-miR-133c	-0.47	-0.66	0.99
SEC61B	ENST00000498603.1	Sec61 beta subunit	32	1	1	0	0	0	0	0	0	0	mmu-miR-133c	-1.01	-1.01	0.9	2009, 2011
LHFP	ENST00000379589.3	lipoma HMGIC fusion partner	5	2	1	1	0	0	0	0	0	0	mmu-miR-133c	-0.95	-0.95	0.81	2009, 2011
PTBP1	ENST00000350092.4	polypyrimidine tract binding protein 1	7007	2	1	0	1	0	0	0	0	1	mmu-miR-133c	-0.95	-0.97	0.99	2009, 2011
TAGLN2	ENST00000368096.1	transgelin 2	2192	2	1	1	0	0	0	0	0	0	mmu-miR-133c	-0.91	-0.92	0.97	2009, 2011
CLTA	ENST00000433436.2	clathrin, light chain A	167	1	1	0	0	0	0	0	0	0	mmu-miR-133a-3p.2	-0.79	-0.79	0.87	2009, 2011
HRSP12	ENST00000254878.3	heat-responsive protein 12	209	1	1	0	0	0	0	0	0	0	mmu-miR-133a-3p.2	-0.76	-0.83	0.83	2009, 2011
TIMM17A	ENST00000367287.4	translocase of inner mitochondrial membrane 17 homolog A (yeast)	5594	1	1	0	0	0	0	0	0	0	mmu-miR-133a-3p.2	-0.75	-0.75	0.89	2009, 2011
SLC50A1	ENST00000368404.4	solute carrier family 50 (sugar efflux transporter), member 1	3317	1	1	0	0	0	0	0	0	0	mmu-miR-133a-3p.2	-0.74	-0.74	0.74	2009, 2011
SLC6A1	ENST00000287766.4	solute carrier family 6 (neurotransmitter transporter), member 1	5	1	1	0	0	1	0	1	0	1	mmu-miR-133a-3p.2	-0.74	-0.74	0.9	2009, 2011
TFAP2D	ENST00000008391.3	transcription factor AP-2 delta (activating enhancer binding protein 2 delta)	5	1	1	0	0	0	0	0	0	0	mmu-miR-133c	-0.74	-0.74	0.66	2009, 2011
CMPK1	ENST00000371873.5	cytidine monophosphate (UMP-CMP) kinase 1, cytosolic	4366	1	1	0	0	0	0	0	0	0	mmu-miR-133a-3p.2	-0.73	-0.73	0.9	2009, 2011
GPM6A	ENST00000280187.7	glycoprotein M6A	335	1	1	0	0	1	0	0	1	0	mmu-miR-133a-3p.2	-0.72	-0.72	0.84	2009, 2011
PPP2CA	ENST00000481195.1	protein phosphatase 2, catalytic subunit, alpha isozyme	11344	1	1	0	0	0	0	0	0	0	mmu-miR-133a-3p.2	-0.68	-0.68	0.9	2009, 2011
PRRT2	ENST00000300797.6	proline-rich transmembrane protein 2	33	2	1	1	0	0	0	0	0	0	mmu-miR-133c	-0.67	-0.67	0.92	2009, 2011
P2RX4	ENST00000337233.4	purinergic receptor P2X, ligand-gated ion channel, 4	680	1	1	0	0	0	0	0	0	0	mmu-miR-133a-3p.2	-0.67	-0.67	< 0.1	2009, 2011
EFNA4	ENST00000368409.3	ephrin-A4	125	1	1	0	0	0	0	0	0	0	mmu-miR-133a-3p.2	-0.66	-0.68	0.61	2009, 2011
DLX3	ENST00000434704.2	distal-less homeobox 3	5	1	1	0	0	1	0	1	0	0	mmu-miR-133a-3p.2	-0.66	-0.66	< 0.1	2009, 2011
SUMO1	ENST00000392246.2	small ubiquitin-like modifier 1	180	1	1	0	0	0	0	0	0	1	mmu-miR-133c	-0.65	-0.65	0.25	2011
SIMC1	ENST00000443967.1	SUMO-interacting motifs containing 1	75	1	1	0	0	0	0	0	0	0	mmu-miR-133a-3p.2	-0.63	-0.63	0.66	2009, 2011
SHISA5	ENST00000296444.2	shisa family member 5	3921	1	1	0	0	1	0	1	0	0	mmu-miR-133a-3p.2	-0.63	-0.63	0.54	2009, 2011
ELFN1	ENST00000424383.2	extracellular leucine-rich repeat and fibronectin type III domain containing 1	5	1	1	0	0	0	0	0	0	1	mmu-miR-133a-3p.2	-0.63	-0.63	0.9	2011
SLC52A2	ENST00000526752.1	solute carrier family 52 (riboflavin transporter), member 2	483	1	1	0	0	0	0	0	0	0	mmu-miR-133a-3p.2	-0.62	-0.62	< 0.1	2009
FAM117B	ENST00000392238.2	family with sequence similarity 117, member B	245	1	1	0	0	2	0	1	1	0	mmu-miR-133a-3p.2	-0.62	-0.63	0.9	2009, 2011
RBMX	ENST00000562646.1	RNA binding motif protein, X-linked	77	1	1	0	0	0	0	0	0	0	mmu-miR-133c	-0.62	-0.62	0.75	2009, 2011
PPP2CB	ENST00000221138.4	protein phosphatase 2, catalytic subunit, beta isozyme	11	1	1	0	0	0	0	0	0	0	mmu-miR-133b-3p	-0.61	-0.61	0.87	2009, 2011
SLC30A7	ENST00000370112.4	solute carrier family 30 (zinc transporter), member 7	204	1	1	0	0	0	0	0	0	1	mmu-miR-133c	-0.61	-0.62	0.9	2011
LANCL2	ENST00000254770.2	LanC lantibiotic synthetase component C-like 2 (bacterial)	237	1	1	0	0	0	0	0	0	1	mmu-miR-133a-3p.2	-0.61	-0.61	0.81	2009, 2011
ACTN4	ENST00000252699.2	actinin, alpha 4	5688	1	1	0	0	0	0	0	0	0	mmu-miR-133a-3p.2	-0.6	-0.6	0.9	2009, 2011
EDEM1	ENST00000256497.4	ER degradation enhancer, mannosidase alpha-like 1	948	1	1	0	0	2	0	1	1	1	mmu-miR-133a-3p.2	-0.6	-0.65	0.9	2009, 2011
GABARAPL1	ENST00000266458.5	GABA(A) receptor-associated protein like 1	117	1	1	0	0	0	0	0	0	0	mmu-miR-133c	-0.6	-0.6	0.62	2009, 2011
ARFIP2	ENST00000254584.2	ADP-ribosylation factor interacting protein 2	798	1	1	0	0	2	0	1	1	0	mmu-miR-133a-3p.2	-0.59	-0.63	0.43	2009, 2011
SGMS2	ENST00000394684.4	sphingomyelin synthase 2	111	1	1	0	0	0	0	0	0	0	mmu-miR-133a-3p.2	-0.58	-0.58	0.9	2009, 2011
FAM57A	ENST00000308278.8	family with sequence similarity 57, member A	978	1	1	0	0	0	0	0	0	0	mmu-miR-133a-3p.2	-0.58	-0.58	< 0.1	2009, 2011
NUP160	ENST00000378460.2	nucleoporin 160kDa	997	1	1	0	0	0	0	0	0	0	mmu-miR-133c	-0.57	-0.58	0.13	2009, 2011
ZNF131	ENST00000505606.2	zinc finger protein 131	1015	1	1	0	0	0	0	0	0	0	mmu-miR-133a-3p.2	-0.57	-0.57	0.83	2011
NAGS	ENST00000293404.3	N-acetylglutamate synthase	562	1	1	0	0	0	0	0	0	0	mmu-miR-133a-3p.2	-0.57	-0.57	0.74	2009, 2011
MAML1	ENST00000292599.3	mastermind-like 1 (Drosophila)	910	2	1	0	1	0	0	0	0	0	mmu-miR-133c	-0.57	-0.57	0.98	2009, 2011
VPS54	ENST00000409558.4	vacuolar protein sorting 54 homolog (S. cerevisiae)	312	1	1	0	0	0	0	0	0	1	mmu-miR-133a-3p.2	-0.57	-0.6	0.88	2009, 2011
DOLPP1	ENST00000540102.1	dolichyldiphosphatase 1	963	1	1	0	0	0	0	0	0	0	mmu-miR-133a-3p.2	-0.56	-0.56	0.9	2009, 2011
SEC61A1	ENST00000243253.3	Sec61 alpha 1 subunit (S. cerevisiae)	2966	1	1	0	0	0	0	0	0	0	mmu-miR-133a-3p.2	-0.56	-0.58	0.88	2009, 2011
EIF4A1	ENST00000582746.1	eukaryotic translation initiation factor 4A1	44	1	1	0	0	0	0	0	0	0	mmu-miR-133a-3p.2	-0.55	-0.68	0.59	2009, 2011
GLRA2	ENST00000218075.4	glycine receptor, alpha 2	5	1	1	0	0	0	0	0	0	0	mmu-miR-133a-3p.2	-0.55	-0.55	0.86	2009, 2011
ANKRD44	ENST00000282272.8	ankyrin repeat domain 44	187	1	1	0	0	1	0	0	1	0	mmu-miR-133c	-0.54	-0.55	0.86	2011
GBA2	ENST00000378088.1	glucosidase, beta (bile acid) 2	19	1	1	0	0	0	0	0	0	0	mmu-miR-133a-3p.2	-0.54	-0.54	ORF
LHX9	ENST00000367390.3	LIM homeobox 9	40	2	1	0	1	2	0	2	0	0	mmu-miR-133c	-0.53	-0.82	0.97
ANKRD28	ENST00000399451.2	ankyrin repeat domain 28	798	1	1	0	0	0	0	0	0	1	mmu-miR-133a-3p.2	-0.53	-0.53	0.9	2009, 2011
SYT2	ENST00000367267.1	synaptotagmin II	5	2	1	1	0	0	0	0	0	1	mmu-miR-133a-3p.2	-0.52	-0.52	0.95	2009, 2011
RAP2C	ENST00000342983.2	RAP2C, member of RAS oncogene family	604	1	1	0	0	0	0	0	0	0	mmu-miR-133a-3p.2	-0.52	-0.55	0.85	2009, 2011
AFTPH	ENST00000238856.4	aftiphilin	6	1	1	0	0	0	0	0	0	0	mmu-miR-133a-3p.2	-0.52	-0.52	0.87	2009, 2011
GCH1	ENST00000491895.2	GTP cyclohydrolase 1	502	1	1	0	0	0	0	0	0	0	mmu-miR-133c	-0.52	-0.55	0.65	2009, 2011
KNDC1	ENST00000304613.3	kinase non-catalytic C-lobe domain (KIND) containing 1	5	1	1	0	0	2	0	1	1	0	mmu-miR-133c	-0.51	-0.51	0.36	2009, 2011
BICC1	ENST00000373886.3	bicaudal C homolog 1 (Drosophila)	165	1	1	0	0	1	1	0	0	0	mmu-miR-133a-3p.2	-0.51	-0.51	0.87	2009, 2011
DCBLD1	ENST00000338728.5	discoidin, CUB and LCCL domain containing 1	876	1	1	0	0	0	0	0	0	0	mmu-miR-133a-3p.2	-0.51	-0.55	< 0.1
SV2A	ENST00000369146.3	synaptic vesicle glycoprotein 2A	10	1	1	0	0	0	0	0	0	1	mmu-miR-133a-3p.2	-0.51	-0.51	0.83	2009, 2011
TRAM2	ENST00000182527.3	translocation associated membrane protein 2	2774	1	1	0	0	0	0	0	0	1	mmu-miR-133a-3p.2	-0.5	-0.51	0.9	2009, 2011
HS2ST1	ENST00000370550.5	heparan sulfate 2-O-sulfotransferase 1	787	1	1	0	0	0	0	0	0	1	mmu-miR-133a-3p.2	-0.5	-0.53	0.9	2009, 2011
ZNF280C	ENST00000370978.4	zinc finger protein 280C	138	1	1	0	0	0	0	0	0	0	mmu-miR-133a-3p.2	-0.5	-0.5	0.9	2009, 2011
KCNA6	ENST00000433855.1	potassium voltage-gated channel, shaker-related subfamily, member 6	5	1	1	0	0	1	0	1	0	1	mmu-miR-133a-3p.2	-0.5	-0.5	< 0.1	2011
SH3GL2	ENST00000380607.4	SH3-domain GRB2-like 2	125	1	1	0	0	0	0	0	0	0	mmu-miR-133c	-0.5	-0.5	0.24	2011
WASF2	ENST00000536657.1	WAS protein family, member 2	311	2	1	0	1	0	0	0	0	0	mmu-miR-133a-3p.2	-0.49	-0.5	0.92	2009, 2011
FOXC1	ENST00000380874.2	forkhead box C1	1301	1	1	0	0	0	0	0	0	0	mmu-miR-133a-3p.2	-0.49	-0.49	0.86	2009, 2011
SOX4	ENST00000244745.1	SRY (sex determining region Y)-box 4	2736	1	1	0	0	0	0	0	0	1	mmu-miR-133a-3p.2	-0.48	-0.51	0.9	2009, 2011
EXD2	ENST00000409018.3	exonuclease 3'-5' domain containing 2	3135	1	1	0	0	0	0	0	0	0	mmu-miR-133a-3p.2	-0.47	-0.47	0.72	2009, 2011
FAM46A	ENST00000369754.3	family with sequence similarity 46, member A	899	1	1	0	0	0	0	0	0	1	mmu-miR-133a-3p.2	-0.47	-0.47	0.88	2009, 2011
SLC39A1	ENST00000356205.4	solute carrier family 39 (zinc transporter), member 1	1193	1	1	0	0	0	0	0	0	0	mmu-miR-133a-3p.2	-0.47	-0.47	< 0.1	2009, 2011
PTPRZ1	ENST00000393386.2	protein tyrosine phosphatase, receptor-type, Z polypeptide 1	7	1	1	0	0	0	0	0	0	0	mmu-miR-133a-3p.2	-0.47	-0.47	0.86	2009, 2011
FGF1	ENST00000360966.5	fibroblast growth factor 1 (acidic)	88	1	1	0	0	0	0	0	0	0	mmu-miR-133a-3p.2	-0.47	-0.64	0.69	2009, 2011
KIAA1045	ENST00000242315.3	KIAA1045	42	1	1	0	0	1	0	1	0	2	mmu-miR-133c	-0.47	-0.53	0.71	2009, 2011
RGL1	ENST00000304685.4	ral guanine nucleotide dissociation stimulator-like 1	188	1	1	0	0	2	0	1	1	0	mmu-miR-133a-3p.2	-0.47	-0.47	0.23	2009, 2011
RB1CC1	ENST00000025008.5	RB1-inducible coiled-coil 1	621	1	1	0	0	0	0	0	0	0	mmu-miR-133a-3p.2	-0.46	-0.49	0.87	2009, 2011
VAT1	ENST00000355653.3	vesicle amine transport 1	2844	1	1	0	0	1	0	1	0	0	mmu-miR-133c	-0.46	-0.46	0.79	2009, 2011
RAD51L3-RFFL	ENST00000593039.1	Uncharacterized protein	670	1	1	0	0	1	0	1	0	0	mmu-miR-133c	-0.46	-0.73	0.54
CAPN15	ENST00000219611.2	calpain 15	5	1	1	0	0	0	0	0	0	0	mmu-miR-133c	-0.46	-0.46	0.9	2009, 2011
FOXL2	ENST00000330315.3	forkhead box L2	20	1	1	0	0	0	0	0	0	0	mmu-miR-133c	-0.45	-0.45	0.71	2009, 2011
DPYSL4	ENST00000338492.4	dihydropyrimidinase-like 4	248	1	1	0	0	0	0	0	0	0	mmu-miR-133c	-0.45	-0.45	0.49	2009, 2011
NDRG1	ENST00000323851.7	N-myc downstream regulated 1	2195	1	1	0	0	0	0	0	0	1	mmu-miR-133a-3p.2	-0.45	-0.45	0.82	2011
RFFL	ENST00000315249.7	ring finger and FYVE-like domain containing E3 ubiquitin protein ligase	670	1	1	0	0	1	0	1	0	0	mmu-miR-133c	-0.44	-0.68	0.54	2009, 2011
CELF6	ENST00000287202.5	CUGBP, Elav-like family member 6	5	1	1	0	0	0	0	0	0	1	mmu-miR-133a-3p.2	-0.44	-0.44	0.9	2009, 2011
PTPRK	ENST00000368226.4	protein tyrosine phosphatase, receptor type, K	641	1	1	0	0	0	0	0	0	0	mmu-miR-133a-3p.2	-0.43	-0.46	0.82	2009, 2011
LHX5	ENST00000261731.3	LIM homeobox 5	5	1	1	0	0	0	0	0	0	0	mmu-miR-133a-3p.2	-0.43	-0.43	0.88	2009, 2011
ARHGEF9	ENST00000253401.6	Cdc42 guanine nucleotide exchange factor (GEF) 9	13	1	1	0	0	0	0	0	0	0	mmu-miR-133a-3p.2	-0.43	-0.43	0.73	2009, 2011
BCL2L2	ENST00000250405.5	BCL2-like 2	1380	1	1	0	0	0	0	0	0	0	mmu-miR-133a-3p.2	-0.42	-0.43	0.8	2009, 2011
ZC3H11A	ENST00000332127.4	zinc finger CCCH-type containing 11A	71	1	1	0	0	0	0	0	0	0	mmu-miR-133a-3p.2	-0.42	-0.42	0.88	2009, 2011
CDIP1	ENST00000564828.1	cell death-inducing p53 target 1	1857	1	1	0	0	0	0	0	0	0	mmu-miR-133c	-0.42	-0.42	0.38	2009, 2011
SLC6A6	ENST00000454876.2	solute carrier family 6 (neurotransmitter transporter), member 6	280	2	1	0	1	0	0	0	0	0	mmu-miR-133a-3p.2	-0.41	-0.43	0.97	2009, 2011
THRAP3	ENST00000354618.5	thyroid hormone receptor associated protein 3	13	1	1	0	0	0	0	0	0	0	mmu-miR-133a-3p.2	-0.41	-0.41	0.73	2009, 2011
YES1	ENST00000577961.1	v-yes-1 Yamaguchi sarcoma viral oncogene homolog 1	168	1	1	0	0	0	0	0	0	0	mmu-miR-133c	-0.4	-0.42	0.87	2009, 2011
FBXL2	ENST00000484457.1	F-box and leucine-rich repeat protein 2	12	1	1	0	0	0	0	0	0	0	mmu-miR-133c	-0.4	-0.4	0.85	2009, 2011
CPNE3	ENST00000198765.4	copine III	756	1	1	0	0	0	0	0	0	0	mmu-miR-133a-3p.2	-0.4	-0.4	0.67	2009, 2011
SGTB	ENST00000381007.4	small glutamine-rich tetratricopeptide repeat (TPR)-containing, beta	205	1	1	0	0	0	0	0	0	0	mmu-miR-133c	-0.4	-0.62	0.67	2009, 2011
TMEM170B	ENST00000379426.1	transmembrane protein 170B	489	1	1	0	0	0	0	0	0	1	mmu-miR-133c	-0.4	-0.45	0.71	2009, 2011
CCDC176	ENST00000394009.3	coiled-coil domain containing 176	61	1	1	0	0	0	0	0	0	0	mmu-miR-133a-3p.2	-0.4	-0.4	ORF
BTBD3	ENST00000254977.3	BTB (POZ) domain containing 3	3798	1	1	0	0	1	0	0	1	0	mmu-miR-133a-3p.2	-0.39	-0.4	0.89	2009, 2011
HPCAL4	ENST00000372844.3	hippocalcin like 4	5	1	1	0	0	0	0	0	0	0	mmu-miR-133c	-0.39	-0.39	0.46	2009, 2011
CECR6	ENST00000399875.1	cat eye syndrome chromosome region, candidate 6	5	1	1	0	0	0	0	0	0	0	mmu-miR-133a-3p.2	-0.39	-0.39	0.89	2009, 2011
PEX5L	ENST00000467460.1	peroxisomal biogenesis factor 5-like	5	1	1	0	0	0	0	0	0	1	mmu-miR-133a-3p.2	-0.39	-0.39	0.9	2009, 2011
RIMS1	ENST00000348717.5	regulating synaptic membrane exocytosis 1	45	1	1	0	0	0	0	0	0	0	mmu-miR-133a-3p.2	-0.38	-0.38	0.87	2009, 2011
PPFIA3	ENST00000334186.4	protein tyrosine phosphatase, receptor type, f polypeptide (PTPRF), interacting protein (liprin), alpha 3	167	1	1	0	0	0	0	0	0	0	mmu-miR-133a-3p.2	-0.38	-0.38	0.52	2009, 2011
ELAVL1	ENST00000407627.2	ELAV like RNA binding protein 1	2812	1	1	0	0	2	1	0	1	2	mmu-miR-133c	-0.37	-0.69	0.82	2009, 2011
KCTD20	ENST00000373731.2	potassium channel tetramerization domain containing 20	88	1	1	0	0	0	0	0	0	0	mmu-miR-133a-3p.2	-0.37	-0.5	0.9	2009, 2011
MMP15	ENST00000219271.3	matrix metallopeptidase 15 (membrane-inserted)	605	1	1	0	0	0	0	0	0	1	mmu-miR-133a-3p.2	-0.37	-0.37	0.89	2009, 2011
GXYLT1	ENST00000398675.3	glucoside xylosyltransferase 1	126	1	1	0	0	0	0	0	0	1	mmu-miR-133a-3p.2	-0.36	-0.36	0.9	2009, 2011
XPO4	ENST00000400602.2	exportin 4	718	1	1	0	0	0	0	0	0	0	mmu-miR-133a-3p.2	-0.36	-0.37	0.89	2009, 2011
MSN	ENST00000360270.5	moesin	5947	1	1	0	0	0	0	0	0	0	mmu-miR-133a-3p.2	-0.34	-0.34	0.67	2009, 2011
KIAA1432	ENST00000414202.2	KIAA1432	1366	1	1	0	0	0	0	0	0	0	mmu-miR-133a-3p.2	-0.34	-0.38	0.9	2011
RAVER1	ENST00000293677.6	ribonucleoprotein, PTB-binding 1	362	1	1	0	0	0	0	0	0	1	mmu-miR-133c	-0.34	-0.34	0.78	2009, 2011
CNTNAP1	ENST00000264638.4	contactin associated protein 1	821	2	1	1	0	0	0	0	0	0	mmu-miR-133c	-0.34	-0.34	0.79	2009, 2011
MYRF	ENST00000278836.5	myelin regulatory factor	131	1	1	0	0	0	0	0	0	0	mmu-miR-133a-3p.2	-0.33	-0.34	0.9	2009, 2011
FAM49A	ENST00000381323.3	family with sequence similarity 49, member A	38	1	1	0	0	0	0	0	0	1	mmu-miR-133a-3p.2	-0.32	-0.46	0.85	2011
COL8A1	ENST00000261037.3	collagen, type VIII, alpha 1	601	1	1	0	0	0	0	0	0	0	mmu-miR-133a-3p.2	-0.32	-0.37	0.32
UBXN7	ENST00000296328.4	UBX domain protein 7	95	2	1	0	1	0	0	0	0	0	mmu-miR-133a-3p.2	-0.32	-0.59	0.99	2009, 2011
OPCML	ENST00000331898.7	opioid binding protein/cell adhesion molecule-like	5	1	1	0	0	0	0	0	0	0	mmu-miR-133c	-0.31	-0.31	0.47	2011
AFAP1	ENST00000360265.4	actin filament associated protein 1	1966	1	1	0	0	0	0	0	0	0	mmu-miR-133a-3p.2	-0.31	-0.36	0.9	2009, 2011
ANKRD12	ENST00000262126.4	ankyrin repeat domain 12	11	1	1	0	0	0	0	0	0	1	mmu-miR-133a-3p.2	-0.31	-0.31	0.9	2009, 2011
NELFA	ENST00000382882.3	negative elongation factor complex member A	1025	1	1	0	0	0	0	0	0	0	mmu-miR-133a-3p.2	-0.31	-0.41	0.52	2009, 2011
EPHA7	ENST00000369303.4	EPH receptor A7	213	1	1	0	0	0	0	0	0	0	mmu-miR-133c	-0.31	-0.32	0.88	2009, 2011
GREB1	ENST00000381486.2	growth regulation by estrogen in breast cancer 1	40	1	1	0	0	0	0	0	0	2	mmu-miR-133c	-0.3	-0.35	0.63	2009, 2011
MAP4	ENST00000383737.4	microtubule-associated protein 4	3914	1	1	0	0	0	0	0	0	0	mmu-miR-133a-3p.2	-0.29	-0.29	0.58	2011
MTMR4	ENST00000579925.1	myotubularin related protein 4	150	1	1	0	0	0	0	0	0	0	mmu-miR-133a-3p.2	-0.29	-0.34	0.25	2009, 2011
RAPH1	ENST00000319170.5	Ras association (RalGDS/AF-6) and pleckstrin homology domains 1	126	1	1	0	0	0	0	0	0	0	mmu-miR-133a-3p.2	-0.29	-0.29	0.65	2009, 2011
FOXN1	ENST00000226247.2	forkhead box N1	5	1	1	0	0	0	0	0	0	0	mmu-miR-133a-3p.2	-0.28	-0.28	0.67
GARNL3	ENST00000314904.5	GTPase activating Rap/RanGAP domain-like 3	117	1	1	0	0	0	0	0	0	0	mmu-miR-133a-3p.2	-0.28	-0.28	0.2	2011
GRID2	ENST00000282020.4	glutamate receptor, ionotropic, delta 2	5	1	1	0	0	0	0	0	0	0	mmu-miR-133c	-0.27	-0.27	0.81
PRKCB	ENST00000303531.7	protein kinase C, beta	81	1	1	0	0	0	0	0	0	0	mmu-miR-133a-3p.2	-0.27	-0.27	ORF
SNRK	ENST00000429705.2	SNF related kinase	153	1	1	0	0	0	0	0	0	0	mmu-miR-133c	-0.26	-0.26	0.88	2009, 2011
UNC13A	ENST00000519716.2	unc-13 homolog A (C. elegans)	5	1	1	0	0	0	0	0	0	0	mmu-miR-133c	-0.26	-0.26	0.9	2009, 2011
GRM5	ENST00000418177.2	glutamate receptor, metabotropic 5	5	1	1	0	0	0	0	0	0	0	mmu-miR-133c	-0.26	-0.26	0.9	2009, 2011
UBFD1	ENST00000395878.3	ubiquitin family domain containing 1	6826	1	1	0	0	0	0	0	0	1	mmu-miR-133a-3p.2	-0.26	-0.26	0.6	2009, 2011
PRDM16	ENST00000511072.1	PR domain containing 16	64	1	1	0	0	0	0	0	0	0	mmu-miR-133a-3p.2	-0.26	-0.35	0.9	2009, 2011
MED12L	ENST00000474524.1	mediator complex subunit 12-like	30	1	1	0	0	0	0	0	0	0	mmu-miR-133c	-0.25	-0.25	0.9	2009, 2011
GPR173	ENST00000332582.4	G protein-coupled receptor 173	99	1	1	0	0	0	0	0	0	1	mmu-miR-133a-3p.2	-0.25	-0.25	0.3	2011
POU6F2	ENST00000518318.2	POU class 6 homeobox 2	5	1	1	0	0	0	0	0	0	2	mmu-miR-133a-3p.2	-0.24	-0.24	0.88
KLHL11	ENST00000319121.3	kelch-like family member 11	16	1	1	0	0	0	0	0	0	0	mmu-miR-133a-3p.2	-0.24	-0.36	0.85
TENM1	ENST00000371130.3	teneurin transmembrane protein 1	5	1	1	0	0	0	0	0	0	0	mmu-miR-133a-3p.2	-0.24	-0.24	0.76	2011
KLHDC10	ENST00000335420.5	kelch domain containing 10	347	1	1	0	0	0	0	0	0	0	mmu-miR-133a-3p.2	-0.24	-0.28	0.74	2009, 2011
TTYH3	ENST00000258796.7	tweety family member 3	188	1	1	0	0	0	0	0	0	0	mmu-miR-133a-3p.2	-0.22	-0.22	0.84	2009, 2011
RUNX1T1	ENST00000523629.1	runt-related transcription factor 1; translocated to, 1 (cyclin D-related)	9	1	1	0	0	0	0	0	0	0	mmu-miR-133a-3p.2	-0.2	-0.2	0.88	2011
CREB5	ENST00000357727.2	cAMP responsive element binding protein 5	54	1	1	0	0	0	0	0	0	0	mmu-miR-133a-3p.2	-0.2	-0.34	0.81	2009, 2011
SOGA3	ENST00000556132.1	SOGA family member 3	95	1	1	0	0	1	0	0	1	0	mmu-miR-133a-3p.2	-0.19	-0.19	< 0.1
SP3	ENST00000310015.6	Sp3 transcription factor	285	1	1	0	0	0	0	0	0	0	mmu-miR-133a-3p.2	-0.18	-0.47	0.9	2009, 2011
FOXP2	ENST00000408937.3	forkhead box P2	169	2	1	0	1	0	0	0	0	0	mmu-miR-133c	-0.18	-0.49	0.97	2011
PTBP3	ENST00000374257.1	polypyrimidine tract binding protein 3	214	2	1	0	1	0	0	0	0	0	mmu-miR-133a-3p.2	-0.18	-0.51	0.97	2009, 2011
ZBTB7B	ENST00000368426.3	zinc finger and BTB domain containing 7B	179	1	1	0	0	0	0	0	0	0	mmu-miR-133a-3p.2	-0.18	-0.48	0.87	2009
MLLT3	ENST00000380338.4	myeloid/lymphoid or mixed-lineage leukemia (trithorax homolog, Drosophila); translocated to, 3	385	1	1	0	0	0	0	0	0	1	mmu-miR-133c	-0.17	-0.24	0.89	2009, 2011
MRC2	ENST00000303375.5	mannose receptor, C type 2	74	1	1	0	0	0	0	0	0	1	mmu-miR-133c	-0.16	-0.16	0.56	2009, 2011
UBA2	ENST00000246548.4	ubiquitin-like modifier activating enzyme 2	122	1	1	0	0	0	0	0	0	0	mmu-miR-133c	-0.16	-0.73	0.9	2009, 2011
PEAK1	ENST00000312493.4	pseudopodium-enriched atypical kinase 1	209	1	1	0	0	1	0	0	1	0	mmu-miR-133a-3p.2	-0.14	-0.16	0.59	2009, 2011
LPGAT1	ENST00000366997.4	lysophosphatidylglycerol acyltransferase 1	135	1	1	0	0	1	0	1	0	1	mmu-miR-133a-3p.2	-0.14	-0.21	0.9	2009, 2011
EMP2	ENST00000359543.3	epithelial membrane protein 2	1725	1	1	0	0	0	0	0	0	0	mmu-miR-133a-3p.2	-0.14	-0.58	0.9	2011
SFXN5	ENST00000410065.1	sideroflexin 5	56	1	1	0	0	1	0	0	1	0	mmu-miR-133a-3p.2	-0.13	-0.36	0.77	2009, 2011
RFX3	ENST00000382004.3	regulatory factor X, 3 (influences HLA class II expression)	37	1	1	0	0	0	0	0	0	2	mmu-miR-133a-3p.2	-0.13	-0.18	< 0.1
TET3	ENST00000409262.3	tet methylcytosine dioxygenase 3	1437	1	1	0	0	0	0	0	0	0	mmu-miR-133c	-0.13	-0.13	0.57	2009, 2011
PTBP2	ENST00000609116.1	polypyrimidine tract binding protein 2	70	1	1	0	0	0	0	0	0	1	mmu-miR-133c	-0.11	-0.28	0.88	2009, 2011
SLC25A37	ENST00000519973.1	solute carrier family 25 (mitochondrial iron transporter), member 37	145	1	1	0	0	0	0	0	0	1	mmu-miR-133c	-0.1	-0.23	0.14
SF3B1	ENST00000335508.6	splicing factor 3b, subunit 1, 155kDa	3215	1	1	0	0	0	0	0	0	1	mmu-miR-133a-3p.2	-0.09	-0.4	0.19
FGF12	ENST00000445105.2	fibroblast growth factor 12	150	1	1	0	0	2	0	1	1	0	mmu-miR-133c	-0.09	-0.68	0.57	2011
ZHX3	ENST00000309060.3	zinc fingers and homeoboxes 3	131	1	1	0	0	1	0	1	0	0	mmu-miR-133a-3p.2	-0.08	-0.25	0.62	2009, 2011
ARRB1	ENST00000420843.2	arrestin, beta 1	598	1	1	0	0	1	0	0	1	0	mmu-miR-133c	-0.08	-0.47	0.89	2011
ZNF362	ENST00000539719.1	zinc finger protein 362	27	1	1	0	0	0	0	0	0	0	mmu-miR-133a-3p.2	-0.07	-0.08	0.19	2009, 2011
DDX19B	ENST00000288071.6	DEAD (Asp-Glu-Ala-Asp) box polypeptide 19B	690	1	1	0	0	0	0	0	0	0	mmu-miR-133a-3p.2	-0.07	-0.44	0.31
ACVR2B	ENST00000352511.4	activin A receptor, type IIB	21	1	1	0	0	0	0	0	0	1	mmu-miR-133c	-0.06	-0.14	0.12	2009, 2011
NUP153	ENST00000262077.2	nucleoporin 153kDa	231	1	1	0	0	0	0	0	0	0	mmu-miR-133a-3p.2	-0.05	-0.51	0.88	2009, 2011
HSPA4L	ENST00000296464.4	heat shock 70kDa protein 4-like	348	1	1	0	0	0	0	0	0	0	mmu-miR-133a-3p.2	-0.05	-0.22	0.59
WDFY2	ENST00000298125.5	WD repeat and FYVE domain containing 2	85	1	1	0	0	0	0	0	0	1	mmu-miR-133a-3p.2	-0.05	-0.38	0.89
NIPA1	ENST00000337435.4	non imprinted in Prader-Willi/Angelman syndrome 1	805	1	1	0	0	1	0	0	1	0	mmu-miR-133c	-0.05	-0.28	0.54	2009, 2011
WIPF2	ENST00000323571.4	WAS/WASL interacting protein family, member 2	214	1	1	0	0	0	0	0	0	0	mmu-miR-133a-3p.2	-0.04	-0.28	0.18	2009, 2011
ZC3H14	ENST00000251038.5	zinc finger CCCH-type containing 14	395	1	1	0	0	0	0	0	0	0	mmu-miR-133a-3p.2	-0.04	-0.6	0.76	2009, 2011
FBXL19	ENST00000338343.4	F-box and leucine-rich repeat protein 19	75	1	1	0	0	0	0	0	0	1	mmu-miR-133a-3p.2	-0.04	-0.13	0.71	2009, 2011
PLEKHA3	ENST00000234453.5	pleckstrin homology domain containing, family A (phosphoinositide binding specific) member 3	767	1	1	0	0	0	0	0	0	0	mmu-miR-133c	-0.03	-0.48	0.9
ACAT2	ENST00000541436.1	acetyl-CoA acetyltransferase 2	5947	1	1	0	0	0	0	0	0	0	mmu-miR-133a-3p.2	-0.02	-0.7	0.31	2009, 2011
BNIP3L	ENST00000380629.2	BCL2/adenovirus E1B 19kDa interacting protein 3-like	191	1	1	0	0	0	0	0	0	0	mmu-miR-133a-3p.2	-0.02	-0.42	0.24	2011
MYH9	ENST00000216181.5	myosin, heavy chain 9, non-muscle	1317	1	1	0	0	0	0	0	0	0	mmu-miR-133a-3p.2	-0.01	-0.26	0.9	2009, 2011
PIP4K2B	ENST00000269554.3	phosphatidylinositol-5-phosphate 4-kinase, type II, beta	148	1	1	0	0	0	0	0	0	0	mmu-miR-133a-3p.2	-0.01	-0.15	0.24	2011
IP6K1	ENST00000468463.1	inositol hexakisphosphate kinase 1	406	1	1	0	0	0	0	0	0	0	mmu-miR-133a-3p.2	-0.01	-0.36	0.83	2009, 2011
WIPI2	ENST00000288828.4	WD repeat domain, phosphoinositide interacting 2	1038	1	1	0	0	0	0	0	0	0	mmu-miR-133a-3p.2	0	-0.48	0.85	2011
CEP128	ENST00000281129.3	centrosomal protein 128kDa	280	1	1	0	0	0	0	0	0	0	mmu-miR-133a-3p.2	0	-0.18	< 0.1
SMARCD1	ENST00000394963.4	SWI/SNF related, matrix associated, actin dependent regulator of chromatin, subfamily d, member 1	952	1	1	0	0	0	0	0	0	0	mmu-miR-133a-3p.2	0	-0.5	0.9	2009, 2011
KIAA0430	ENST00000396368.3	KIAA0430	461	1	1	0	0	0	0	0	0	0	mmu-miR-133a-3p.2	0	-0.18	0.87	2011
PRAF2	ENST00000376390.4	PRA1 domain family, member 2	1921	1	0	1	0	1	1	0	0	1	mmu-miR-133a-3p.2	-0.82	-0.82	0.57
AF196779.12	ENST00000376358.3	Uncharacterized protein; WD repeat domain phosphoinositide-interacting protein 4	1921	1	0	1	0	1	1	0	0	1	mmu-miR-133a-3p.2	-0.75	-0.75	0.57
WDR45	ENST00000553851.1	WD repeat domain 45	1921	1	0	1	0	1	1	0	0	1	mmu-miR-133a-3p.2	-0.74	-0.75	0.52
VPS13B	ENST00000395996.1	vacuolar protein sorting 13 homolog B (yeast)	262	1	0	0	1	3	0	1	2	2	mmu-miR-133a-3p.2	-0.7	-0.7	< 0.1
GDNF	ENST00000326524.2	glial cell derived neurotrophic factor	7	2	0	2	0	0	0	0	0	1	mmu-miR-133a-3p.2	-0.67	-0.67	> 0.99	2011
LASP1	ENST00000318008.6	LIM and SH3 protein 1	552	1	0	1	0	1	0	1	0	0	mmu-miR-133a-3p.2	-0.63	-0.64	0.88	2009, 2011
PAX7	ENST00000420770.2	paired box 7	7	2	0	1	1	1	0	0	1	2	mmu-miR-133c	-0.62	-0.62	0.93	2011
SYT1	ENST00000457153.2	synaptotagmin I	13	1	0	1	0	1	0	1	0	0	mmu-miR-133c	-0.6	-0.6	0.89	2009, 2011
UBE2Q2	ENST00000267938.4	ubiquitin-conjugating enzyme E2Q family member 2	106	1	0	1	0	1	1	0	0	0	mmu-miR-133a-3p.2	-0.6	-0.65	< 0.1
TMEM167A	ENST00000502346.1	transmembrane protein 167A	1029	1	0	1	0	0	0	0	0	0	mmu-miR-133a-3p.2	-0.56	-0.56	0.93	2009, 2011
LDLRAP1	ENST00000374338.4	low density lipoprotein receptor adaptor protein 1	111	3	0	0	3	0	0	0	0	0	mmu-miR-133a-3p.2	-0.53	-0.53	> 0.99	2011
YPEL2	ENST00000312655.4	yippee-like 2 (Drosophila)	62	1	0	1	0	1	1	0	0	0	mmu-miR-133a-3p.2	-0.52	-0.52	0.88	2009, 2011
PAN3	ENST00000282391.5	PAN3 poly(A) specific ribonuclease subunit homolog (S. cerevisiae)	361	1	0	1	0	1	0	1	0	0	mmu-miR-133a-3p.2	-0.51	-0.51	0.81	2009, 2011
TMOD3	ENST00000308580.7	tropomodulin 3 (ubiquitous)	1533	2	0	1	1	0	0	0	0	0	mmu-miR-133c	-0.5	-0.69	0.95	2011
SF3B4	ENST00000271628.8	splicing factor 3b, subunit 4, 49kDa	8	1	0	1	0	0	0	0	0	0	mmu-miR-133c	-0.5	-0.5	0.67	2009, 2011
COL25A1	ENST00000399132.1	collagen, type XXV, alpha 1	270	2	0	0	2	0	0	0	0	2	mmu-miR-133c	-0.49	-0.58	0.97
SCN2B	ENST00000278947.5	sodium channel, voltage-gated, type II, beta subunit	5	1	0	1	0	1	0	1	0	1	mmu-miR-133a-3p.2	-0.49	-0.49	0.75	2009, 2011
CERS2	ENST00000368954.5	ceramide synthase 2	4620	1	0	0	1	1	0	1	0	0	mmu-miR-133a-3p.2	-0.48	-0.48	0.77	2009, 2011
AL117190.3	ENST00000599197.1	Esophagus cancer-related gene-2 interaction susceptibility protein; Uncharacterized protein	30	1	0	1	0	1	1	0	0	0	mmu-miR-133a-3p.2	-0.48	-0.6	0.62
CELF1	ENST00000395290.2	CUGBP, Elav-like family member 1	153	2	0	1	1	1	1	0	0	0	mmu-miR-133a-3p.2	-0.48	-0.58	0.92	2011
SEPHS2	ENST00000542752.1	selenophosphate synthetase 2	62	1	0	1	0	0	0	0	0	0	mmu-miR-133a-3p.2	-0.47	-0.48	0.44	2011
KIAA1429	ENST00000437199.1	KIAA1429	1629	1	0	1	0	0	0	0	0	2	mmu-miR-133c	-0.47	-0.5	0.77	2009, 2011
ATP6AP2	ENST00000378438.4	ATPase, H+ transporting, lysosomal accessory protein 2	6001	1	0	1	0	0	0	0	0	0	mmu-miR-133a-3p.2	-0.46	-0.47	0.66	2009, 2011
PTH1R	ENST00000418619.1	parathyroid hormone 1 receptor	5	1	0	1	0	0	0	0	0	0	mmu-miR-133a-3p.2	-0.46	-0.46	0.63	2009, 2011
HAPLN1	ENST00000274341.4	hyaluronan and proteoglycan link protein 1	5	1	0	1	0	1	0	0	1	0	mmu-miR-133c	-0.45	-0.45	0.91	2011
SOBP	ENST00000317357.5	sine oculis binding protein homolog (Drosophila)	22	2	0	1	1	0	0	0	0	0	mmu-miR-133a-3p.2	-0.45	-0.54	0.96	2009, 2011
RARB	ENST00000437042.2	retinoic acid receptor, beta	48	1	0	1	0	0	0	0	0	0	mmu-miR-133c	-0.45	-0.45	0.73	2009, 2011
PURB	ENST00000395699.2	purine-rich element binding protein B	497	2	0	1	1	1	1	0	0	1	mmu-miR-133a-3p.2	-0.45	-0.5	0.95	2009, 2011
LETMD1	ENST00000380123.2	LETM1 domain containing 1	1619	2	0	1	1	0	0	0	0	0	mmu-miR-133c	-0.45	-0.45	0.89	2009, 2011
SNX30	ENST00000374232.3	sorting nexin family member 30	33	1	0	1	0	1	0	0	1	1	mmu-miR-133c	-0.44	-0.53	0.92	2009, 2011
DUSP1	ENST00000239223.3	dual specificity phosphatase 1	37211	1	0	1	0	0	0	0	0	1	mmu-miR-133c	-0.44	-0.47	0.82
ZC3H7A	ENST00000396516.2	zinc finger CCCH-type containing 7A	1071	1	0	1	0	0	0	0	0	0	mmu-miR-133a-3p.2	-0.44	-0.44	0.65	2009, 2011
VAMP2	ENST00000404970.3	vesicle-associated membrane protein 2 (synaptobrevin 2)	1840	1	0	1	0	0	0	0	0	0	mmu-miR-133a-3p.2	-0.43	-0.44	0.66	2009, 2011
UBE2Q1	ENST00000292211.4	ubiquitin-conjugating enzyme E2Q family member 1	3046	1	0	1	0	0	0	0	0	1	mmu-miR-133a-3p.2	-0.43	-0.43	0.88	2009, 2011
SOX8	ENST00000293894.3	SRY (sex determining region Y)-box 8	5	2	0	2	0	0	0	0	0	0	mmu-miR-133c	-0.43	-0.43	0.68
TBPL1	ENST00000237264.4	TBP-like 1	69	1	0	1	0	0	0	0	0	0	mmu-miR-133a-3p.2	-0.43	-0.43	0.93	2009, 2011
VAPB	ENST00000395802.3	VAMP (vesicle-associated membrane protein)-associated protein B and C	391	1	0	1	0	1	0	0	1	1	mmu-miR-133c	-0.42	-0.44	0.96	2009, 2011
SGK1	ENST00000367858.5	serum/glucocorticoid regulated kinase 1	369	1	0	1	0	0	0	0	0	0	mmu-miR-133a-3p.2	-0.42	-0.43	0.81	2009, 2011
LDOC1	ENST00000370526.2	leucine zipper, down-regulated in cancer 1	14	1	0	1	0	0	0	0	0	0	mmu-miR-133a-3p.2	-0.42	-0.42	0.55	2011
MMGT1	ENST00000305963.2	membrane magnesium transporter 1	113	2	0	0	2	0	0	0	0	1	mmu-miR-133c	-0.42	-0.43	0.85
CASC3	ENST00000264645.7	cancer susceptibility candidate 3	493	1	0	1	0	0	0	0	0	1	mmu-miR-133a-3p.2	-0.41	-0.41	0.63	2009, 2011
BCORL1	ENST00000540052.1	BCL6 corepressor-like 1	209	1	0	1	0	1	0	0	1	1	mmu-miR-133c	-0.41	-0.43	0.84	2009, 2011
MECOM	ENST00000460814.1	MDS1 and EVI1 complex locus	138	1	0	1	0	1	0	1	0	0	mmu-miR-133a-3p.2	-0.41	-0.42	0.85	2009, 2011
C20orf194	ENST00000453730.2	chromosome 20 open reading frame 194	1083	1	0	1	0	0	0	0	0	0	mmu-miR-133a-3p.2	-0.41	-0.41	0.57	2009, 2011
PFN2	ENST00000239940.7	profilin 2	2184	1	0	1	0	0	0	0	0	0	mmu-miR-133a-3p.2	-0.41	-0.42	ORF	2009, 2011
ATP6V0D1	ENST00000290949.3	ATPase, H+ transporting, lysosomal 38kDa, V0 subunit d1	4359	1	0	1	0	0	0	0	0	0	mmu-miR-133a-3p.2	-0.4	-0.4	0.74	2009, 2011
RCE1	ENST00000309657.3	RCE1 homolog, prenyl protein protease (S. cerevisiae)	4698	1	0	1	0	0	0	0	0	0	mmu-miR-133a-3p.2	-0.4	-0.4	0.62	2009, 2011
CTBP2	ENST00000337195.5	C-terminal binding protein 2	16	1	0	1	0	0	0	0	0	1	mmu-miR-133c	-0.39	-0.39	0.95	2009, 2011
NNAT	ENST00000062104.2	neuronatin	5	1	0	1	0	0	0	0	0	0	mmu-miR-133a-3p.2	-0.39	-0.39	0.59	2009, 2011
RPL17-C18orf32	ENST00000584895.1	RPL17-C18orf32 readthrough	733	1	0	1	0	0	0	0	0	0	mmu-miR-133c	-0.38	-0.38	ORF
NRIP3	ENST00000309166.3	nuclear receptor interacting protein 3	58	1	0	1	0	0	0	0	0	0	mmu-miR-133c	-0.37	-0.37	0.78	2009, 2011
CRLF3	ENST00000324238.6	cytokine receptor-like factor 3	5	1	0	1	0	0	0	0	0	0	mmu-miR-133a-3p.2	-0.37	-0.37	0.69	2009
CRK	ENST00000398970.5	v-crk avian sarcoma virus CT10 oncogene homolog	1841	1	0	1	0	0	0	0	0	1	mmu-miR-133c	-0.37	-0.37	0.73	2009, 2011
SLC7A8	ENST00000469263.1	solute carrier family 7 (amino acid transporter light chain, L system), member 8	15	1	0	1	0	0	0	0	0	0	mmu-miR-133a-3p.2	-0.37	-0.37	0.84	2009, 2011
AKAP9	ENST00000356239.3	A kinase (PRKA) anchor protein 9	514	1	0	1	0	0	0	0	0	0	mmu-miR-133a-3p.2	-0.36	-0.36	0.69	2011
FGFR1	ENST00000397091.5	fibroblast growth factor receptor 1	650	2	0	1	1	0	0	0	0	0	mmu-miR-133c	-0.36	-0.38	0.96	2009, 2011
RAB30	ENST00000533486.1	RAB30, member RAS oncogene family	274	2	0	0	2	1	0	0	1	3	mmu-miR-133c	-0.35	-0.36	0.98	2009
CDK13	ENST00000181839.4	cyclin-dependent kinase 13	32	1	0	1	0	0	0	0	0	0	mmu-miR-133a-3p.2	-0.35	-0.35	0.97	2009, 2011
TSPAN18	ENST00000340160.3	tetraspanin 18	332	1	0	0	1	1	0	1	0	0	mmu-miR-133a-3p.2	-0.35	-0.4	0.79	2011
ARHGAP12	ENST00000311380.4	Rho GTPase activating protein 12	190	1	0	1	0	0	0	0	0	0	mmu-miR-133a-3p.2	-0.35	-0.35	0.81	2009, 2011
SLC35F5	ENST00000245680.2	solute carrier family 35, member F5	136	1	0	1	0	0	0	0	0	0	mmu-miR-133a-3p.2	-0.35	-0.35	0.58
PTPRD	ENST00000381196.4	protein tyrosine phosphatase, receptor type, D	101	2	0	1	1	0	0	0	0	0	mmu-miR-133c	-0.34	-0.39	0.95	2009, 2011
PLXNA3	ENST00000369682.3	plexin A3	2992	1	0	1	0	0	0	0	0	0	mmu-miR-133a-3p.2	-0.34	-0.35	0.75
SGPP1	ENST00000247225.6	sphingosine-1-phosphate phosphatase 1	1340	1	0	1	0	0	0	0	0	0	mmu-miR-133a-3p.2	-0.34	-0.34	0.66	2009, 2011
SYNPO2L	ENST00000372873.4	synaptopodin 2-like	5	1	0	1	0	0	0	0	0	1	mmu-miR-133a-3p.2	-0.34	-0.34	0.73	2009, 2011
ZNF740	ENST00000416904.3	zinc finger protein 740	2137	1	0	1	0	0	0	0	0	0	mmu-miR-133c	-0.34	-0.34	0.81	2009, 2011
STX5	ENST00000377897.4	syntaxin 5	402	1	0	1	0	0	0	0	0	0	mmu-miR-133a-3p.2	-0.34	-0.35	0.52	2009, 2011
NMT1	ENST00000592782.1	N-myristoyltransferase 1	1991	1	0	0	1	1	1	0	0	0	mmu-miR-133c	-0.33	-0.35	0.84	2009, 2011
PAPD5	ENST00000357464.3	PAP associated domain containing 5	152	2	0	0	2	0	0	0	0	1	mmu-miR-133c	-0.33	-0.37	0.93	2009, 2011
ARL3	ENST00000260746.5	ADP-ribosylation factor-like 3	1387	1	0	0	1	0	0	0	0	0	mmu-miR-133a-3p.2	-0.33	-0.33	0.86	2009, 2011
ELF2	ENST00000394235.2	E74-like factor 2 (ets domain transcription factor)	26	1	0	1	0	0	0	0	0	0	mmu-miR-133a-3p.2	-0.33	-0.33	0.92	2009, 2011
TEAD1	ENST00000361905.4	TEA domain family member 1 (SV40 transcriptional enhancer factor)	740	2	0	0	2	0	0	0	0	1	mmu-miR-133c	-0.33	-0.34	0.98	2009, 2011
TPD52	ENST00000379096.5	tumor protein D52	4585	1	0	0	1	0	0	0	0	0	mmu-miR-133c	-0.33	-0.33	0.83	2011
PIK3C2A	ENST00000265970.7	phosphatidylinositol-4-phosphate 3-kinase, catalytic subunit type 2 alpha	280	1	0	1	0	0	0	0	0	0	mmu-miR-133c	-0.33	-0.33	0.84	2011
SERTAD4	ENST00000367012.3	SERTA domain containing 4	296	1	0	1	0	0	0	0	0	0	mmu-miR-133a-3p.2	-0.32	-0.34	0.92
PPFIA2	ENST00000549396.1	protein tyrosine phosphatase, receptor type, f polypeptide (PTPRF), interacting protein (liprin), alpha 2	5	1	0	1	0	0	0	0	0	0	mmu-miR-133a-3p.2	-0.32	-0.32	0.72	2011
MEIS2	ENST00000397624.3	Meis homeobox 2	63	1	0	1	0	0	0	0	0	0	mmu-miR-133a-3p.2	-0.32	-0.32	0.77	2009, 2011
LRRC7	ENST00000310961.5	leucine rich repeat containing 7	18	1	0	1	0	0	0	0	0	0	mmu-miR-133a-3p.2	-0.32	-0.32	0.78	2009, 2011
PTPN22	ENST00000460620.1	protein tyrosine phosphatase, non-receptor type 22 (lymphoid)	5	1	0	1	0	0	0	0	0	0	mmu-miR-133a-3p.2	-0.32	-0.32	ORF
PPFIA1	ENST00000253925.7	protein tyrosine phosphatase, receptor type, f polypeptide (PTPRF), interacting protein (liprin), alpha 1	760	1	0	1	0	0	0	0	0	0	mmu-miR-133c	-0.32	-0.32	0.63	2009, 2011
DOT1L	ENST00000398665.3	DOT1-like histone H3K79 methyltransferase	439	1	0	1	0	0	0	0	0	0	mmu-miR-133a-3p.2	-0.31	-0.31	0.98	2009, 2011
QKI	ENST00000392127.2	QKI, KH domain containing, RNA binding	323	2	0	1	1	1	0	0	1	1	mmu-miR-133a-3p.2	-0.31	-0.37	0.96	2009, 2011
SOGA1	ENST00000279034.6	suppressor of glucose, autophagy associated 1	93	1	0	1	0	0	0	0	0	0	mmu-miR-133a-3p.2	-0.31	-0.31	0.58	2011
SESN1	ENST00000436639.2	sestrin 1	96	1	0	1	0	0	0	0	0	0	mmu-miR-133a-3p.2	-0.31	-0.31	0.63	2011
PITPNM2	ENST00000280562.5	phosphatidylinositol transfer protein, membrane-associated 2	66	1	0	1	0	0	0	0	0	0	mmu-miR-133a-3p.2	-0.31	-0.32	0.92	2009, 2011
TPM4	ENST00000300933.4	tropomyosin 4	332	1	0	0	1	0	0	0	0	1	mmu-miR-133c	-0.31	-0.31	0.61	2009, 2011
TFE3	ENST00000315869.7	transcription factor binding to IGHM enhancer 3	20	1	0	1	0	0	0	0	0	0	mmu-miR-133c	-0.3	-0.3	0.7	2009, 2011
KPNA6	ENST00000373625.3	karyopherin alpha 6 (importin alpha 7)	272	1	0	1	0	1	1	0	0	0	mmu-miR-133c	-0.3	-0.39	0.7	2009, 2011
PREX1	ENST00000396220.1	phosphatidylinositol-3,4,5-trisphosphate-dependent Rac exchange factor 1	14	1	0	1	0	0	0	0	0	0	mmu-miR-133a-3p.2	-0.3	-0.3	0.93	2009, 2011
PER1	ENST00000317276.4	period circadian clock 1	1210	1	0	1	0	0	0	0	0	0	mmu-miR-133c	-0.3	-0.3	0.71	2009, 2011
ARPC5	ENST00000359856.6	actin related protein 2/3 complex, subunit 5, 16kDa	677	1	0	0	1	0	0	0	0	0	mmu-miR-133a-3p.2	-0.3	-0.3	0.69	2009, 2011
SACM1L	ENST00000389061.5	SAC1 suppressor of actin mutations 1-like (yeast)	159	1	0	1	0	0	0	0	0	0	mmu-miR-133c	-0.3	-0.35	0.7	2009, 2011
LAMB3	ENST00000356082.4	laminin, beta 3	15	1	0	1	0	0	0	0	0	0	mmu-miR-133a-3p.2	-0.3	-0.3	0.45	2009, 2011
SLC25A39	ENST00000225308.8	solute carrier family 25, member 39	2741	1	0	0	1	0	0	0	0	0	mmu-miR-133c	-0.3	-0.3	0.81	2009, 2011
CRTAM	ENST00000227348.4	cytotoxic and regulatory T cell molecule	5	1	0	1	0	0	0	0	0	0	mmu-miR-133a-3p.2	-0.3	-0.3	0.63	2009, 2011
CPLX2	ENST00000359546.4	complexin 2	5	1	0	0	1	0	0	0	0	1	mmu-miR-133c	-0.29	-0.29	0.63	2011
TXLNA	ENST00000373610.3	taxilin alpha	564	1	0	1	0	0	0	0	0	0	mmu-miR-133c	-0.29	-0.3	0.82	2009, 2011
BCL2L1	ENST00000376062.2	BCL2-like 1	7726	1	0	1	0	0	0	0	0	0	mmu-miR-133a-3p.2	-0.29	-0.29	0.58	2009, 2011
TCF7	ENST00000518915.1	transcription factor 7 (T-cell specific, HMG-box)	883	1	0	1	0	0	0	0	0	0	mmu-miR-133c	-0.29	-0.29	0.55	2011
TOR2A	ENST00000458505.3	torsin family 2, member A	75	1	0	1	0	0	0	0	0	0	mmu-miR-133a-3p.2	-0.29	-0.31	ORF
PFKFB3	ENST00000536985.1	6-phosphofructo-2-kinase/fructose-2,6-biphosphatase 3	29	1	0	1	0	0	0	0	0	0	mmu-miR-133a-3p.2	-0.29	-0.29	0.5	2009, 2011
TFG	ENST00000240851.4	TRK-fused gene	2164	1	0	0	1	0	0	0	0	0	mmu-miR-133a-3p.2	-0.28	-0.28	0.85	2011
B3GNT9	ENST00000449549.3	UDP-GlcNAc:betaGal beta-1,3-N-acetylglucosaminyltransferase 9	56	1	0	0	1	0	0	0	0	0	mmu-miR-133a-3p.2	-0.28	-0.29	0.82	2011
SUPT16H	ENST00000216297.2	suppressor of Ty 16 homolog (S. cerevisiae)	528	1	0	1	0	0	0	0	0	0	mmu-miR-133a-3p.2	-0.28	-0.28	0.83	2009, 2011
BTBD10	ENST00000278174.5	BTB (POZ) domain containing 10	5	1	0	0	1	0	0	0	0	1	mmu-miR-133c	-0.28	-0.28	0.55
VTI1B	ENST00000554659.1	vesicle transport through interaction with t-SNAREs 1B	264	1	0	0	1	1	0	0	1	0	mmu-miR-133a-3p.2	-0.28	-0.32	< 0.1
USH1G	ENST00000319642.1	Usher syndrome 1G (autosomal recessive)	5	1	0	0	1	0	0	0	0	0	mmu-miR-133c	-0.28	-0.28	0.82	2011
FAM43B	ENST00000332947.4	family with sequence similarity 43, member B	17	1	0	1	0	0	0	0	0	0	mmu-miR-133c	-0.28	-0.28	0.43	2009, 2011
CEP85L	ENST00000368491.3	centrosomal protein 85kDa-like	14	1	0	1	0	0	0	0	0	0	mmu-miR-133a-3p.2	-0.28	-0.28	0.88	2011
SCOC	ENST00000608372.1	short coiled-coil protein	922	1	0	0	1	0	0	0	0	1	mmu-miR-133a-3p.2	-0.28	-0.28	0.86	2009, 2011
DIAPH2	ENST00000324765.8	diaphanous-related formin 2	91	1	0	1	0	0	0	0	0	0	mmu-miR-133a-3p.2	-0.28	-0.32	0.74	2009
EGFR	ENST00000275493.2	epidermal growth factor receptor	632	1	0	1	0	1	0	0	1	0	mmu-miR-133a-3p.2	-0.28	-0.28	0.58	2011
KCND3	ENST00000369697.1	potassium voltage-gated channel, Shal-related subfamily, member 3	23	1	0	1	0	1	0	0	1	2	mmu-miR-133c	-0.28	-0.28	0.98
FAM19A5	ENST00000358295.5	family with sequence similarity 19 (chemokine (C-C motif)-like), member A5	14	1	0	0	1	0	0	0	0	1	mmu-miR-133c	-0.28	-0.28	0.86	2009, 2011
USP6	ENST00000332776.4	ubiquitin specific peptidase 6 (Tre-2 oncogene)	5	2	0	1	1	0	0	0	0	0	mmu-miR-133c	-0.27	-0.27	0.64	2009, 2011
PPP2R2D	ENST00000422256.2	protein phosphatase 2, regulatory subunit B, delta	169	1	0	0	1	1	0	1	0	0	mmu-miR-133a-3p.2	-0.27	-0.51	0.89	2009, 2011
ANKRD52	ENST00000267116.7	ankyrin repeat domain 52	2913	2	0	1	1	1	0	1	0	0	mmu-miR-133a-3p.2	-0.27	-0.27	0.91	2009, 2011
PSEN1	ENST00000344094.3	presenilin 1	1340	1	0	1	0	0	0	0	0	1	mmu-miR-133c	-0.27	-0.27	< 0.1
SLC25A36	ENST00000446041.2	solute carrier family 25 (pyrimidine nucleotide carrier ), member 36	264	2	0	0	2	0	0	0	0	0	mmu-miR-133a-3p.2	-0.27	-0.34	0.94	2009, 2011
LZTS2	ENST00000370223.3	leucine zipper, putative tumor suppressor 2	10	1	0	0	1	0	0	0	0	1	mmu-miR-133a-3p.2	-0.27	-0.27	0.76	2009, 2011
TNFRSF10B	ENST00000276431.4	tumor necrosis factor receptor superfamily, member 10b	828	1	0	0	1	0	0	0	0	0	mmu-miR-133a-3p.2	-0.26	-0.36	0.86	2009, 2011
MAML3	ENST00000509479.2	mastermind-like 3 (Drosophila)	159	1	0	1	0	0	0	0	0	0	mmu-miR-133a-3p.2	-0.26	-0.26	0.96	2009, 2011
MAN1A2	ENST00000356554.3	mannosidase, alpha, class 1A, member 2	603	1	0	0	1	1	0	1	0	0	mmu-miR-133c	-0.26	-0.33	0.86	2009, 2011
KLF7	ENST00000423015.1	Kruppel-like factor 7 (ubiquitous)	737	1	0	0	1	0	0	0	0	2	mmu-miR-133a-3p.2	-0.26	-0.3	0.77
NCKAP5L	ENST00000335999.6	NCK-associated protein 5-like	141	1	0	1	0	0	0	0	0	0	mmu-miR-133a-3p.2	-0.26	-0.26	0.44	2009, 2011
MEIS1	ENST00000488550.1	Meis homeobox 1	533	1	0	1	0	0	0	0	0	1	mmu-miR-133c	-0.26	-0.26	0.77	2009, 2011
CSNK1G3	ENST00000360683.2	casein kinase 1, gamma 3	28	2	0	1	1	0	0	0	0	0	mmu-miR-133c	-0.26	-0.58	0.92	2009, 2011
SLMO2	ENST00000355937.4	slowmo homolog 2 (Drosophila)	374	1	0	1	0	0	0	0	0	0	mmu-miR-133c	-0.26	-0.27	0.92	2009, 2011
CKAP4	ENST00000378026.4	cytoskeleton-associated protein 4	1923	1	0	0	1	0	0	0	0	0	mmu-miR-133a-3p.2	-0.26	-0.26	0.86	2009, 2011
UBE2K	ENST00000261427.5	ubiquitin-conjugating enzyme E2K	762	1	0	1	0	0	0	0	0	0	mmu-miR-133a-3p.2	-0.26	-0.46	0.48
FBXW11	ENST00000296933.6	F-box and WD repeat domain containing 11	81	1	0	1	0	0	0	0	0	0	mmu-miR-133a-3p.2	-0.26	-0.27	0.49	2009, 2011
CACUL1	ENST00000369151.3	CDK2-associated, cullin domain 1	213	1	0	1	0	2	0	0	2	0	mmu-miR-133a-3p.2	-0.25	-0.37	0.98	2009, 2011
FOSL2	ENST00000379619.1	FOS-like antigen 2	2255	1	0	1	0	3	0	2	1	0	mmu-miR-133c	-0.25	-0.92	0.95
CDK8	ENST00000536792.1	cyclin-dependent kinase 8	280	1	0	1	0	0	0	0	0	3	mmu-miR-133a-3p.2	-0.25	-0.25	< 0.1
RBMS1	ENST00000348849.3	RNA binding motif, single stranded interacting protein 1	90	2	0	0	2	0	0	0	0	0	mmu-miR-133a-3p.2	-0.25	-0.25	0.93	2011
ERMP1	ENST00000381506.3	endoplasmic reticulum metallopeptidase 1	53	1	0	1	0	0	0	0	0	0	mmu-miR-133a-3p.2	-0.25	-0.25	ORF
GDI2	ENST00000380191.4	GDP dissociation inhibitor 2	664	1	0	1	0	0	0	0	0	0	mmu-miR-133c	-0.25	-0.3	> 0.99	2009, 2011
SLC8A2	ENST00000236877.6	solute carrier family 8 (sodium/calcium exchanger), member 2	5	1	0	1	0	0	0	0	0	0	mmu-miR-133a-3p.2	-0.25	-0.25	0.8	2009, 2011
ITPRIPL2	ENST00000381440.3	inositol 1,4,5-trisphosphate receptor interacting protein-like 2	893	1	0	0	1	1	0	0	1	1	mmu-miR-133c	-0.25	-0.26	0.81	2009, 2011
POU4F1	ENST00000377208.5	POU class 4 homeobox 1	61	1	0	1	0	0	0	0	0	0	mmu-miR-133a-3p.2	-0.25	-0.25	0.83	2009, 2011
RWDD2A	ENST00000369724.4	RWD domain containing 2A	286	1	0	0	1	0	0	0	0	0	mmu-miR-133a-3p.2	-0.25	-0.25	0.66
RBPJ	ENST00000504907.1	recombination signal binding protein for immunoglobulin kappa J region	70	1	0	1	0	0	0	0	0	0	mmu-miR-133c	-0.25	-0.3	0.82	2009, 2011
CTGF	ENST00000367976.3	connective tissue growth factor	10083	1	0	0	1	0	0	0	0	0	mmu-miR-133a-3p.2	-0.25	-0.27	0.8	2009, 2011
TGFBR1	ENST00000374994.4	transforming growth factor, beta receptor 1	249	1	0	1	0	0	0	0	0	1	mmu-miR-133c	-0.25	-0.29	0.86	2011
TBL1X	ENST00000407597.2	transducin (beta)-like 1X-linked	125	1	0	0	1	1	0	1	0	1	mmu-miR-133a-3p.2	-0.25	-0.28	0.84	2009, 2011
NELL2	ENST00000395487.2	NEL-like 2 (chicken)	32	1	0	0	1	0	0	0	0	0	mmu-miR-133a-3p.2	-0.25	-0.25	0.54
TMEM200B	ENST00000521452.1	transmembrane protein 200B	152	1	0	0	1	0	0	0	0	0	mmu-miR-133a-3p.2	-0.24	-0.24	0.66	2009, 2011
C1QL1	ENST00000253407.3	complement component 1, q subcomponent-like 1	14	1	0	0	1	0	0	0	0	0	mmu-miR-133a-3p.2	-0.24	-0.24	0.81	2009, 2011
ZNF436	ENST00000314011.4	zinc finger protein 436	73	1	0	1	0	0	0	0	0	0	mmu-miR-133a-3p.2	-0.24	-0.24	0.75	2009, 2011
PWWP2B	ENST00000305233.5	PWWP domain containing 2B	5	1	0	0	1	0	0	0	0	0	mmu-miR-133c	-0.24	-0.24	0.69	2009, 2011
FRS2	ENST00000550389.1	fibroblast growth factor receptor substrate 2	176	1	0	1	0	0	0	0	0	0	mmu-miR-133a-3p.2	-0.24	-0.32	0.54
DYNC1LI2	ENST00000258198.2	dynein, cytoplasmic 1, light intermediate chain 2	137	1	0	0	1	0	0	0	0	0	mmu-miR-133a-3p.2	-0.24	-0.24	0.86	2009, 2011
GRIA2	ENST00000296526.7	glutamate receptor, ionotropic, AMPA 2	5	1	0	0	1	1	0	0	1	1	mmu-miR-133a-3p.2	-0.23	-0.23	0.75
ASH1L	ENST00000368346.3	ash1 (absent, small, or homeotic)-like (Drosophila)	56	1	0	1	0	0	0	0	0	0	mmu-miR-133c	-0.23	-0.23	0.72	2009, 2011
UNK	ENST00000293218.3	unkempt homolog (Drosophila)	124	1	0	1	0	0	0	0	0	0	mmu-miR-133a-3p.2	-0.23	-0.23	0.57	2009, 2011
ABCC1	ENST00000399408.2	ATP-binding cassette, sub-family C (CFTR/MRP), member 1	441	1	0	0	1	1	0	0	1	0	mmu-miR-133a-3p.2	-0.23	-0.23	0.89	2009, 2011
MAP3K3	ENST00000361357.3	mitogen-activated protein kinase kinase kinase 3	144	1	0	1	0	1	0	0	1	0	mmu-miR-133c	-0.23	-0.28	0.67	2009, 2011
FSCN1	ENST00000382361.3	fascin homolog 1, actin-bundling protein (Strongylocentrotus purpuratus)	192	1	0	0	1	0	0	0	0	0	mmu-miR-133a-3p.2	-0.23	-0.23	0.86	2009, 2011
SEMA4G	ENST00000210633.3	sema domain, immunoglobulin domain (Ig), transmembrane domain (TM) and short cytoplasmic domain, (semaphorin) 4G	1015	1	0	1	0	0	0	0	0	0	mmu-miR-133a-3p.2	-0.23	-0.23	0.47	2009, 2011
SLC7A2	ENST00000494857.1	solute carrier family 7 (cationic amino acid transporter, y+ system), member 2	1233	1	0	1	0	0	0	0	0	0	mmu-miR-133a-3p.2	-0.22	-0.23	0.54	2009, 2011
TMEM110	ENST00000355083.5	transmembrane protein 110	306	1	0	0	1	0	0	0	0	0	mmu-miR-133c	-0.22	-0.22	0.86	2009, 2011
GRM7	ENST00000486284.1	glutamate receptor, metabotropic 7	5	1	0	0	1	0	0	0	0	1	mmu-miR-133c	-0.22	-0.22	0.79	2009, 2011
IDH1	ENST00000345146.2	isocitrate dehydrogenase 1 (NADP+), soluble	503	1	0	0	1	0	0	0	0	0	mmu-miR-133a-3p.2	-0.22	-0.22	0.83	2011
TJP2	ENST00000453658.2	tight junction protein 2	527	1	0	1	0	0	0	0	0	0	mmu-miR-133a-3p.2	-0.22	-0.22	ORF	2009, 2011
NR6A1	ENST00000487099.2	nuclear receptor subfamily 6, group A, member 1	1082	1	0	0	1	0	0	0	0	3	mmu-miR-133a-3p.2	-0.22	-0.22	0.76
AK2	ENST00000467905.1	adenylate kinase 2	3125	1	0	0	1	0	0	0	0	0	mmu-miR-133c	-0.22	-0.22	0.84	2011
ANK2	ENST00000357077.4	ankyrin 2, neuronal	133	1	0	0	1	1	0	1	0	0	mmu-miR-133c	-0.22	-0.22	0.81	2011
ZBTB14	ENST00000357006.4	zinc finger and BTB domain containing 14	459	2	0	0	2	0	0	0	0	0	mmu-miR-133c	-0.22	-0.4	0.97
NCAM2	ENST00000400546.1	neural cell adhesion molecule 2	64	1	0	0	1	0	0	0	0	1	mmu-miR-133c	-0.22	-0.22	0.86	2009, 2011
HLF	ENST00000226067.5	hepatic leukemia factor	15	1	0	0	1	0	0	0	0	0	mmu-miR-133a-3p.2	-0.21	-0.21	0.86	2009, 2011
SPTSSA	ENST00000298130.4	serine palmitoyltransferase, small subunit A	27	1	0	0	1	0	0	0	0	1	mmu-miR-133a-3p.2	-0.21	-0.34	0.85	2009, 2011
EYA1	ENST00000388742.4	eyes absent homolog 1 (Drosophila)	222	1	0	0	1	0	0	0	0	0	mmu-miR-133a-3p.2	-0.21	-0.21	0.79	2009, 2011
EIF3J	ENST00000261868.5	eukaryotic translation initiation factor 3, subunit J	1646	1	0	0	1	0	0	0	0	0	mmu-miR-133a-3p.2	-0.21	-0.21	0.64
IQGAP2	ENST00000274364.6	IQ motif containing GTPase activating protein 2	588	1	0	0	1	0	0	0	0	0	mmu-miR-133a-3p.2	-0.21	-0.21	0.86	2009
C17orf96	ENST00000325814.5	chromosome 17 open reading frame 96	19	1	0	0	1	1	0	0	1	0	mmu-miR-133a-3p.2	-0.21	-0.21	0.72	2011
COL1A1	ENST00000225964.5	collagen, type I, alpha 1	73360	1	0	0	1	0	0	0	0	1	mmu-miR-133a-3p.2	-0.21	-0.21	0.67	2011
SIX5	ENST00000560168.1	SIX homeobox 5	47	1	0	0	1	1	0	0	1	0	mmu-miR-133c	-0.21	-0.23	0.64	2009, 2011
FOXG1	ENST00000382535.3	forkhead box G1	40	1	0	0	1	0	0	0	0	0	mmu-miR-133a-3p.2	-0.21	-0.21	0.8	2009, 2011
PPP1R9B	ENST00000316878.6	protein phosphatase 1, regulatory subunit 9B	120	1	0	1	0	1	0	0	1	0	mmu-miR-133a-3p.2	-0.21	-0.21	0.74	2009, 2011
ESYT1	ENST00000394048.5	extended synaptotagmin-like protein 1	401	1	0	0	1	0	0	0	0	0	mmu-miR-133a-3p.2	-0.21	-0.21	0.78	2009, 2011
SLC27A4	ENST00000300456.4	solute carrier family 27 (fatty acid transporter), member 4	523	1	0	0	1	0	0	0	0	1	mmu-miR-133a-3p.2	-0.21	-0.24	0.86	2009, 2011
AP2M1	ENST00000382456.3	adaptor-related protein complex 2, mu 1 subunit	10753	1	0	0	1	0	0	0	0	0	mmu-miR-133a-3p.2	-0.2	-0.2	0.62	2009, 2011
EYA4	ENST00000367895.5	eyes absent homolog 4 (Drosophila)	242	1	0	0	1	0	0	0	0	1	mmu-miR-133c	-0.2	-0.23	0.86	2009, 2011
WTAP	ENST00000358372.4	Wilms tumor 1 associated protein	286	1	0	0	1	0	0	0	0	0	mmu-miR-133c	-0.2	-0.21	0.8	2011
SIRT1	ENST00000212015.6	sirtuin 1	220	1	0	0	1	0	0	0	0	0	mmu-miR-133c	-0.2	-0.2	0.77	2009, 2011
ARX	ENST00000379044.4	aristaless related homeobox	5	1	0	0	1	0	0	0	0	0	mmu-miR-133a-3p.2	-0.2	-0.2	0.62	2011
ZHX1	ENST00000395571.3	zinc fingers and homeoboxes 1	88	1	0	0	1	0	0	0	0	0	mmu-miR-133a-3p.2	-0.2	-0.2	0.72	2009, 2011
TGFB2	ENST00000366930.4	transforming growth factor, beta 2	157	1	0	0	1	0	0	0	0	1	mmu-miR-133a-3p.2	-0.2	-0.22	0.86	2011
XPO1	ENST00000401558.2	exportin 1 (CRM1 homolog, yeast)	404	1	0	0	1	0	0	0	0	0	mmu-miR-133a-3p.2	-0.2	-0.2	0.81	2009, 2011
MTX3	ENST00000509852.1	metaxin 3	304	1	0	0	1	1	0	0	1	0	mmu-miR-133a-3p.2	-0.2	-0.2	0.8	2009, 2011
CNNM2	ENST00000369878.4	cyclin M2	517	1	0	0	1	0	0	0	0	0	mmu-miR-133c	-0.2	-0.2	0.86	2009, 2011
SGSM1	ENST00000400358.4	small G protein signaling modulator 1	25	1	0	0	1	0	0	0	0	0	mmu-miR-133c	-0.2	-0.2	0.86	2009, 2011
HIVEP2	ENST00000367604.1	human immunodeficiency virus type I enhancer binding protein 2	137	1	0	0	1	0	0	0	0	0	mmu-miR-133c	-0.2	-0.2	0.81	2009, 2011
HS3ST5	ENST00000312719.5	heparan sulfate (glucosamine) 3-O-sulfotransferase 5	22	1	0	0	1	0	0	0	0	0	mmu-miR-133a-3p.2	-0.2	-0.2	0.75	2011
ZNF710	ENST00000268154.4	zinc finger protein 710	5	1	0	0	1	1	0	1	0	0	mmu-miR-133c	-0.2	-0.2	0.81	2009, 2011
SLC41A1	ENST00000367137.3	solute carrier family 41 (magnesium transporter), member 1	300	1	0	1	0	0	0	0	0	0	mmu-miR-133a-3p.2	-0.2	-0.2	0.57	2009, 2011
MID2	ENST00000262843.6	midline 2	194	1	0	1	0	0	0	0	0	0	mmu-miR-133a-3p.2	-0.2	-0.25	0.45	2011
ZBTB16	ENST00000335953.4	zinc finger and BTB domain containing 16	73	1	0	1	0	0	0	0	0	0	mmu-miR-133a-3p.2	-0.2	-0.21	0.9
FAM13A	ENST00000395002.2	family with sequence similarity 13, member A	441	1	0	0	1	0	0	0	0	0	mmu-miR-133a-3p.2	-0.19	-0.19	0.78	2009, 2011
MRGBP	ENST00000370487.3	MRG/MORF4L binding protein	886	1	0	0	1	1	0	1	0	0	mmu-miR-133a-3p.2	-0.19	-0.5	0.77	2009, 2011
DLG2	ENST00000398309.2	discs, large homolog 2 (Drosophila)	15	1	0	1	0	0	0	0	0	0	mmu-miR-133a-3p.2	-0.19	-0.19	0.47	2011
FAF2	ENST00000261942.6	Fas associated factor family member 2	1700	1	0	0	1	0	0	0	0	1	mmu-miR-133a-3p.2	-0.19	-0.19	0.86	2009, 2011
MRFAP1	ENST00000382581.4	Morf4 family associated protein 1	264	1	0	0	1	0	0	0	0	0	mmu-miR-133a-3p.2	-0.19	-0.22	0.79	2011
LTBP1	ENST00000404525.1	latent transforming growth factor beta binding protein 1	5324	1	0	0	1	0	0	0	0	0	mmu-miR-133a-3p.2	-0.19	-0.19	0.75	2009, 2011
ALDH5A1	ENST00000357578.3	aldehyde dehydrogenase 5 family, member A1	325	1	0	1	0	0	0	0	0	0	mmu-miR-133c	-0.19	-0.34	0.63	2009, 2011
MRVI1	ENST00000421747.1	murine retrovirus integration site 1 homolog	26	1	0	1	0	0	0	0	0	0	mmu-miR-133c	-0.19	-0.19	0.51	2009, 2011
DSTYK	ENST00000367160.4	dual serine/threonine and tyrosine protein kinase	256	1	0	0	1	0	0	0	0	1	mmu-miR-133a-3p.2	-0.19	-0.2	0.72	2009, 2011
PPP6R3	ENST00000393800.2	protein phosphatase 6, regulatory subunit 3	400	1	0	0	1	0	0	0	0	0	mmu-miR-133a-3p.2	-0.19	-0.19	0.78	2009, 2011
ADCY6	ENST00000357869.3	adenylate cyclase 6	6	1	0	1	0	0	0	0	0	0	mmu-miR-133a-3p.2	-0.19	-0.19	0.68	2009, 2011
SLC4A1	ENST00000262418.6	solute carrier family 4 (anion exchanger), member 1	5	1	0	1	0	0	0	0	0	0	mmu-miR-133a-3p.2	-0.19	-0.19	0.46
FLVCR1	ENST00000366971.4	feline leukemia virus subgroup C cellular receptor 1	322	1	0	1	0	1	0	0	1	0	mmu-miR-133a-3p.2	-0.19	-0.26	0.69	2011
NUS1	ENST00000368494.3	nuclear undecaprenyl pyrophosphate synthase 1 homolog (S. cerevisiae)	302	1	0	0	1	0	0	0	0	0	mmu-miR-133c	-0.18	-0.18	0.82	2009, 2011
OTUD7B	ENST00000369135.4	OTU domain containing 7B	299	1	0	0	1	0	0	0	0	0	mmu-miR-133a-3p.2	-0.18	-0.18	0.85	2011
DNAJC3	ENST00000602402.1	DnaJ (Hsp40) homolog, subfamily C, member 3	125	1	0	0	1	1	0	0	1	0	mmu-miR-133a-3p.2	-0.18	-0.2	0.65	2011
RHOA	ENST00000454011.2	ras homolog family member A	8507	1	0	0	1	0	0	0	0	0	mmu-miR-133a-3p.2	-0.18	-0.18	ORF
LIN7C	ENST00000278193.2	lin-7 homolog C (C. elegans)	1701	1	0	0	1	0	0	0	0	0	mmu-miR-133a-3p.2	-0.18	-0.2	0.86	2009, 2011
PDIK1L	ENST00000374271.4	PDLIM1 interacting kinase 1 like	5	1	0	0	1	0	0	0	0	0	mmu-miR-133a-3p.2	-0.18	-0.18	0.67	2009, 2011
SP1	ENST00000426431.2	Sp1 transcription factor	402	1	0	0	1	1	0	1	0	0	mmu-miR-133c	-0.18	-0.25	0.83	2009, 2011
PCDH17	ENST00000377918.3	protocadherin 17	477	1	0	0	1	1	0	0	1	1	mmu-miR-133a-3p.2	-0.18	-0.22	0.84
FOXP4	ENST00000373063.3	forkhead box P4	228	2	0	1	1	0	0	0	0	0	mmu-miR-133a-3p.2	-0.18	-0.38	0.99	2009, 2011
HMGXB3	ENST00000503427.1	HMG box domain containing 3	26	1	0	0	1	0	0	0	0	0	mmu-miR-133c	-0.18	-0.18	0.86	2011
KIRREL	ENST00000368172.1	kin of IRRE like (Drosophila)	493	1	0	0	1	0	0	0	0	1	mmu-miR-133c	-0.18	-0.18	0.83
ZNF217	ENST00000371471.2	zinc finger protein 217	668	1	0	0	1	0	0	0	0	0	mmu-miR-133a-3p.2	-0.18	-0.18	0.7	2009, 2011
ZNF385A	ENST00000551109.1	zinc finger protein 385A	94	1	0	1	0	0	0	0	0	0	mmu-miR-133c	-0.17	-0.17	0.61	2009, 2011
SMPD4	ENST00000351288.6	sphingomyelin phosphodiesterase 4, neutral membrane (neutral sphingomyelinase-3)	5	1	0	0	1	0	0	0	0	0	mmu-miR-133a-3p.2	-0.17	-0.17	0.79	2009, 2011
AQP1	ENST00000509504.1	Uncharacterized protein	5	1	0	1	0	1	0	0	1	0	mmu-miR-133a-3p.2	-0.17	-0.38	0.64
FAM73A	ENST00000370791.3	family with sequence similarity 73, member A	837	1	0	0	1	0	0	0	0	0	mmu-miR-133a-3p.2	-0.17	-0.17	0.78	2009, 2011
E2F7	ENST00000416496.2	E2F transcription factor 7	308	1	0	0	1	0	0	0	0	0	mmu-miR-133a-3p.2	-0.17	-0.17	0.83	2009, 2011
PPP2R5E	ENST00000337537.3	protein phosphatase 2, regulatory subunit B', epsilon isoform	23	1	0	0	1	0	0	0	0	0	mmu-miR-133a-3p.2	-0.17	-0.17	0.8	2009, 2011
ELMO1	ENST00000341056.3	engulfment and cell motility 1	118	1	0	0	1	0	0	0	0	1	mmu-miR-133a-3p.2	-0.17	-0.17	0.71	2009, 2011
ADCY5	ENST00000462833.1	adenylate cyclase 5	25	1	0	0	1	0	0	0	0	0	mmu-miR-133a-3p.2	-0.17	-0.17	0.86	2011
DDX3Y	ENST00000336079.3	DEAD (Asp-Glu-Ala-Asp) box helicase 3, Y-linked	5	1	0	0	1	0	0	0	0	0	mmu-miR-133a-3p.2	-0.17	-0.17	0.77
GAB2	ENST00000340149.2	GRB2-associated binding protein 2	627	1	0	0	1	1	0	0	1	1	mmu-miR-133a-3p.2	-0.17	-0.17	0.71	2009, 2011
JAZF1	ENST00000283928.5	JAZF zinc finger 1	869	1	0	1	0	1	0	0	1	0	mmu-miR-133c	-0.17	-0.47	0.72	2009, 2011
ZBTB38	ENST00000514251.1	zinc finger and BTB domain containing 38	1270	1	0	0	1	0	0	0	0	1	mmu-miR-133a-3p.2	-0.17	-0.17	0.86	2009, 2011
KCNJ12	ENST00000583088.1	potassium inwardly-rectifying channel, subfamily J, member 12	9	1	0	0	1	0	0	0	0	0	mmu-miR-133c	-0.17	-0.17	0.85	2009, 2011
CDK5R1	ENST00000313401.3	cyclin-dependent kinase 5, regulatory subunit 1 (p35)	335	1	0	0	1	0	0	0	0	0	mmu-miR-133a-3p.2	-0.17	-0.17	0.85	2009, 2011
KLHL5	ENST00000261425.3	kelch-like family member 5	366	1	0	0	1	1	0	1	0	0	mmu-miR-133a-3p.2	-0.17	-0.48	0.84	2011
CNNM4	ENST00000540067.1	cyclin M4	1249	1	0	1	0	0	0	0	0	0	mmu-miR-133a-3p.2	-0.16	-0.16	0.49	2009, 2011
MAEA	ENST00000303400.4	macrophage erythroblast attacher	5906	1	0	0	1	0	0	0	0	0	mmu-miR-133a-3p.2	-0.16	-0.16	0.85	2009, 2011
PCSK6	ENST00000348070.1	proprotein convertase subtilisin/kexin type 6	670	1	0	0	1	0	0	0	0	0	mmu-miR-133c	-0.16	-0.16	0.66
SPRY4	ENST00000344120.4	sprouty homolog 4 (Drosophila)	110	1	0	0	1	0	0	0	0	0	mmu-miR-133a-3p.2	-0.16	-0.16	0.68	2009, 2011
FBXO30	ENST00000237281.4	F-box protein 30	224	1	0	0	1	0	0	0	0	0	mmu-miR-133a-3p.2	-0.16	-0.16	0.85	2009, 2011
ZBTB4	ENST00000380599.4	zinc finger and BTB domain containing 4	1039	1	0	0	1	0	0	0	0	0	mmu-miR-133c	-0.16	-0.16	0.67	2009, 2011
TPM3	ENST00000368531.2	tropomyosin 3	669	1	0	0	1	0	0	0	0	0	mmu-miR-133c	-0.16	-0.17	0.61	2011
AIF1L	ENST00000372300.1	allograft inflammatory factor 1-like	487	1	0	0	1	0	0	0	0	0	mmu-miR-133a-3p.2	-0.16	-0.24	0.81	2009, 2011
GDF11	ENST00000257868.5	growth differentiation factor 11	847	1	0	0	1	0	0	0	0	3	mmu-miR-133c	-0.16	-0.17	0.8	2011
ZNRF3	ENST00000544604.2	zinc and ring finger 3	179	1	0	0	1	0	0	0	0	0	mmu-miR-133a-3p.2	-0.16	-0.2	0.86	2009, 2011
TOB2	ENST00000327492.3	transducer of ERBB2, 2	71	1	0	0	1	0	0	0	0	0	mmu-miR-133a-3p.2	-0.16	-0.17	0.58	2011
KIF21A	ENST00000361961.3	kinesin family member 21A	37	1	0	0	1	0	0	0	0	0	mmu-miR-133c	-0.15	-0.15	0.7	2009, 2011
CSRNP1	ENST00000273153.5	cysteine-serine-rich nuclear protein 1	544	1	0	0	1	0	0	0	0	0	mmu-miR-133c	-0.15	-0.15	0.81	2009, 2011
MLXIP	ENST00000319080.7	MLX interacting protein	69	1	0	0	1	0	0	0	0	0	mmu-miR-133a-3p.2	-0.15	-0.15	0.85	2009, 2011
KIAA1522	ENST00000401073.2	KIAA1522	13	1	0	0	1	0	0	0	0	0	mmu-miR-133a-3p.2	-0.15	-0.15	0.81	2009, 2011
GOLGA3	ENST00000204726.3	golgin A3	944	1	0	0	1	0	0	0	0	0	mmu-miR-133a-3p.2	-0.15	-0.16	0.76	2009, 2011
SLC30A3	ENST00000233535.4	solute carrier family 30 (zinc transporter), member 3	5	1	0	0	1	0	0	0	0	0	mmu-miR-133a-3p.2	-0.15	-0.15	0.57	2011
TRHDE	ENST00000261180.4	thyrotropin-releasing hormone degrading enzyme	34	1	0	1	0	0	0	0	0	0	mmu-miR-133a-3p.2	-0.15	-0.26	0.88	2009, 2011
DCUN1D4	ENST00000334635.5	DCN1, defective in cullin neddylation 1, domain containing 4	1118	1	0	0	1	0	0	0	0	2	mmu-miR-133a-3p.2	-0.15	-0.17	0.59	2009, 2011
MIER3	ENST00000381226.3	mesoderm induction early response 1, family member 3	112	1	0	0	1	0	0	0	0	0	mmu-miR-133a-3p.2	-0.15	-0.15	0.71	2011
VAMP3	ENST00000054666.6	vesicle-associated membrane protein 3	515	1	0	0	1	0	0	0	0	0	mmu-miR-133a-3p.2	-0.15	-0.22	0.8	2009, 2011
ADAMTS5	ENST00000284987.5	ADAM metallopeptidase with thrombospondin type 1 motif, 5	68	2	0	0	2	1	1	0	0	1	mmu-miR-133c	-0.15	-0.18	0.98	2009, 2011
UBE2Z	ENST00000360943.5	ubiquitin-conjugating enzyme E2Z	3688	1	0	0	1	0	0	0	0	0	mmu-miR-133a-3p.2	-0.14	-0.14	0.84	2009, 2011
XXbac-BPG32J3.20	ENST00000461287.1		1251	1	0	1	0	0	0	0	0	0	mmu-miR-133a-3p.2	-0.14	-0.14	ORF
PTPN3	ENST00000412145.1	protein tyrosine phosphatase, non-receptor type 3	374	1	0	1	0	0	0	0	0	0	mmu-miR-133a-3p.2	-0.14	-0.34	0.62	2011
TGOLN2	ENST00000377386.3	trans-golgi network protein 2	1914	1	0	0	1	0	0	0	0	0	mmu-miR-133a-3p.2	-0.14	-0.14	0.78	2009, 2011
PTMA	ENST00000409115.3	prothymosin, alpha	312	1	0	0	1	0	0	0	0	0	mmu-miR-133a-3p.2	-0.14	-0.14	0.57
RAB5C	ENST00000346213.4	RAB5C, member RAS oncogene family	96	1	0	0	1	0	0	0	0	0	mmu-miR-133c	-0.14	-0.21	0.86	2009, 2011
SH3PXD2B	ENST00000311601.5	SH3 and PX domains 2B	123	1	0	0	1	1	0	0	1	1	mmu-miR-133c	-0.14	-0.18	0.61	2009, 2011
SMARCA2	ENST00000349721.2	SWI/SNF related, matrix associated, actin dependent regulator of chromatin, subfamily a, member 2	158	1	0	0	1	0	0	0	0	0	mmu-miR-133a-3p.2	-0.14	-0.14	0.72
SLC33A1	ENST00000392845.3	solute carrier family 33 (acetyl-CoA transporter), member 1	145	1	0	0	1	0	0	0	0	0	mmu-miR-133a-3p.2	-0.14	-0.25	0.77	2011
SYAP1	ENST00000380155.3	synapse associated protein 1	2689	1	0	0	1	0	0	0	0	0	mmu-miR-133c	-0.14	-0.29	0.86	2009, 2011
TTPAL	ENST00000372906.2	tocopherol (alpha) transfer protein-like	265	1	0	0	1	1	0	0	1	1	mmu-miR-133a-3p.2	-0.13	-0.39	0.85	2009, 2011
ZNF395	ENST00000344423.5	zinc finger protein 395	1044	1	0	0	1	0	0	0	0	1	mmu-miR-133c	-0.13	-0.13	0.86	2009, 2011
PRDM1	ENST00000369089.3	PR domain containing 1, with ZNF domain	48	1	0	0	1	0	0	0	0	0	mmu-miR-133a-3p.2	-0.13	-0.16	0.77	2009, 2011
SORBS3	ENST00000240123.7	sorbin and SH3 domain containing 3	1126	1	0	0	1	0	0	0	0	0	mmu-miR-133a-3p.2	-0.13	-0.13	0.77	2009, 2011
NFIB	ENST00000397575.3	nuclear factor I/B	1149	1	0	0	1	0	0	0	0	1	mmu-miR-133a-3p.2	-0.13	-0.13	0.8	2009, 2011
POLH	ENST00000372226.1	polymerase (DNA directed), eta	450	1	0	1	0	0	0	0	0	0	mmu-miR-133a-3p.2	-0.13	-0.14	ORF
ARHGAP39	ENST00000377307.2	Rho GTPase activating protein 39	14	1	0	0	1	0	0	0	0	0	mmu-miR-133c	-0.13	-0.13	0.83	2009, 2011
WNT4	ENST00000290167.6	wingless-type MMTV integration site family, member 4	5	1	0	0	1	0	0	0	0	2	mmu-miR-133a-3p.2	-0.13	-0.13	0.81	2009, 2011
GABBR2	ENST00000259455.2	gamma-aminobutyric acid (GABA) B receptor, 2	214	1	0	0	1	0	0	0	0	0	mmu-miR-133a-3p.2	-0.13	-0.13	0.59	2009, 2011
MPPED1	ENST00000417669.2	metallophosphoesterase domain containing 1	51	1	0	1	0	0	0	0	0	0	mmu-miR-133a-3p.2	-0.13	-0.44	0.76
YIPF4	ENST00000238831.4	Yip1 domain family, member 4	3482	1	0	0	1	0	0	0	0	0	mmu-miR-133a-3p.2	-0.13	-0.29	0.86
PITPNM3	ENST00000421306.3	PITPNM family member 3	5	1	0	0	1	0	0	0	0	0	mmu-miR-133a-3p.2	-0.12	-0.12	0.86	2011
EPHB4	ENST00000360620.3	EPH receptor B4	350	1	0	0	1	0	0	0	0	0	mmu-miR-133a-3p.2	-0.12	-0.12	0.69	2009, 2011
VPS4B	ENST00000238497.5	vacuolar protein sorting 4 homolog B (S. cerevisiae)	180	1	0	0	1	0	0	0	0	0	mmu-miR-133a-3p.2	-0.12	-0.12	0.57
CD47	ENST00000361309.5	CD47 molecule	520	1	0	0	1	1	1	0	0	1	mmu-miR-133c	-0.12	-0.34	0.74	2009, 2011
CHD2	ENST00000394196.4	chromodomain helicase DNA binding protein 2	1237	1	0	0	1	0	0	0	0	0	mmu-miR-133c	-0.12	-0.12	0.86	2009, 2011
KMT2C	ENST00000262189.6	lysine (K)-specific methyltransferase 2C	417	1	0	0	1	0	0	0	0	0	mmu-miR-133a-3p.2	-0.12	-0.12	0.8	2009, 2011
PHTF2	ENST00000416283.2	putative homeodomain transcription factor 2	1730	1	0	0	1	0	0	0	0	0	mmu-miR-133a-3p.2	-0.12	-0.12	0.7	2009, 2011
NFIA	ENST00000403491.3	nuclear factor I/A	5	1	0	0	1	0	0	0	0	1	mmu-miR-133a-3p.2	-0.12	-0.12	0.81	2011
UNC80	ENST00000439458.1	unc-80 homolog (C. elegans)	5	1	0	0	1	0	0	0	0	0	mmu-miR-133a-3p.2	-0.12	-0.12	0.78	2011
TMEM33	ENST00000504986.1	transmembrane protein 33	1470	2	0	0	2	0	0	0	0	0	mmu-miR-133c	-0.12	-0.24	0.89	2011
WDTC1	ENST00000319394.3	WD and tetratricopeptide repeats 1	137	1	0	0	1	0	0	0	0	0	mmu-miR-133c	-0.12	-0.12	0.73	2011
CMTM6	ENST00000205636.3	CKLF-like MARVEL transmembrane domain containing 6	169	1	0	0	1	0	0	0	0	0	mmu-miR-133a-3p.2	-0.12	-0.2	0.75	2009, 2011
IMPG1	ENST00000369963.3	interphotoreceptor matrix proteoglycan 1	5	1	0	0	1	0	0	0	0	0	mmu-miR-133a-3p.2	-0.12	-0.12	ORF
AAK1	ENST00000409085.4	AP2 associated kinase 1	27	1	0	0	1	0	0	0	0	3	mmu-miR-133c	-0.12	-0.12	0.85	2009, 2011
ARHGAP24	ENST00000395184.1	Rho GTPase activating protein 24	9	1	0	0	1	0	0	0	0	0	mmu-miR-133c	-0.11	-0.2	0.86	2009, 2011
FBN1	ENST00000316623.5	fibrillin 1	798	1	0	0	1	0	0	0	0	0	mmu-miR-133a-3p.2	-0.11	-0.11	0.55	2009, 2011
PCDH1	ENST00000503492.1	protocadherin 1	30	1	0	1	0	1	0	1	0	0	mmu-miR-133c	-0.11	-0.12	< 0.1
SCN1A	ENST00000423058.2	sodium channel, voltage-gated, type I, alpha subunit	21	1	0	0	1	0	0	0	0	0	mmu-miR-133a-3p.2	-0.11	-0.11	0.86
BHLHE41	ENST00000242728.4	basic helix-loop-helix family, member e41	50	1	0	0	1	0	0	0	0	0	mmu-miR-133a-3p.2	-0.11	-0.12	0.7	2009, 2011
STARD13	ENST00000336934.5	StAR-related lipid transfer (START) domain containing 13	314	1	0	0	1	0	0	0	0	0	mmu-miR-133a-3p.2	-0.11	-0.15	0.66	2009, 2011
INSR	ENST00000341500.5	insulin receptor	577	1	0	0	1	0	0	0	0	2	mmu-miR-133c	-0.11	-0.11	0.85	2009, 2011
CMTM4	ENST00000394106.2	CKLF-like MARVEL transmembrane domain containing 4	22	1	0	1	0	0	0	0	0	0	mmu-miR-133a-3p.2	-0.11	-0.38	0.78	2011
TRAF3	ENST00000560371.1	TNF receptor-associated factor 3	833	1	0	0	1	0	0	0	0	1	mmu-miR-133c	-0.1	-0.14	0.86	2011
LZTS3	ENST00000329152.3	Homo sapiens leucine zipper, putative tumor suppressor family member 3 (LZTS3), transcript variant 2, mRNA.	78	1	0	0	1	0	0	0	0	0	mmu-miR-133a-3p.2	-0.1	-0.1	0.68	2009, 2011
ESRRG	ENST00000361525.3	estrogen-related receptor gamma	5	1	0	0	1	0	0	0	0	0	mmu-miR-133a-3p.2	-0.1	-0.1	0.75
ATP2A2	ENST00000395494.2	ATPase, Ca++ transporting, cardiac muscle, slow twitch 2	2042	1	0	0	1	1	0	0	1	0	mmu-miR-133a-3p.2	-0.1	-0.11	0.72	2011
RP1-170O19.20	ENST00000470747.4	Uncharacterized protein	151	1	0	0	1	0	0	0	0	0	mmu-miR-133a-3p.2	-0.1	-0.22	0.86
FBN2	ENST00000262464.4	fibrillin 2	167	1	0	0	1	0	0	0	0	0	mmu-miR-133c	-0.1	-0.11	0.69	2009, 2011
ZBTB10	ENST00000430430.1	zinc finger and BTB domain containing 10	113	1	0	0	1	0	0	0	0	1	mmu-miR-133a-3p.2	-0.1	-0.18	0.86	2009, 2011
DUSP7	ENST00000495880.1	dual specificity phosphatase 7	68	1	0	0	1	0	0	0	0	0	mmu-miR-133a-3p.2	-0.1	-0.16	0.86	2011
LIN28B	ENST00000345080.4	lin-28 homolog B (C. elegans)	118	1	0	0	1	0	0	0	0	0	mmu-miR-133a-3p.2	-0.1	-0.1	0.77	2009, 2011
FAM199X	ENST00000493442.1	family with sequence similarity 199, X-linked	856	1	0	0	1	0	0	0	0	0	mmu-miR-133a-3p.2	-0.09	-0.1	0.84	2009, 2011
GIGYF1	ENST00000275732.5	GRB10 interacting GYF protein 1	5	1	0	0	1	0	0	0	0	0	mmu-miR-133c	-0.09	-0.09	0.65	2011
TMEM87B	ENST00000283206.4	transmembrane protein 87B	219	1	0	0	1	0	0	0	0	0	mmu-miR-133a-3p.2	-0.09	-0.11	0.75	2011
HOXA9	ENST00000396345.1	homeobox A9	151	1	0	0	1	0	0	0	0	0	mmu-miR-133a-3p.2	-0.09	-0.2	0.8	2009, 2011
ARHGDIA	ENST00000269321.7	Rho GDP dissociation inhibitor (GDI) alpha	452	1	0	1	0	0	0	0	0	0	mmu-miR-133a-3p.2	-0.09	-0.33	0.86	2009, 2011
CAPN5	ENST00000531028.1	calpain 5	89	2	0	1	1	0	0	0	0	1	mmu-miR-133a-3p.2	-0.09	-0.55	0.88	2009, 2011
OTUD4	ENST00000454497.2	OTU domain containing 4	18	1	0	0	1	0	0	0	0	0	mmu-miR-133c	-0.09	-0.09	0.63
SRSF10	ENST00000343255.5	serine/arginine-rich splicing factor 10	1920	2	0	0	2	0	0	0	0	0	mmu-miR-133a-3p.2	-0.09	-0.09	0.79
LEPROTL1	ENST00000321250.8	leptin receptor overlapping transcript-like 1	1242	1	0	0	1	1	0	0	1	0	mmu-miR-133a-3p.2	-0.08	-0.23	0.86	2011
UCK2	ENST00000372212.4	uridine-cytidine kinase 2	437	1	0	1	0	1	0	1	0	0	mmu-miR-133a-3p.2	-0.08	-0.4	0.88	2011
SOCS2	ENST00000548537.1	suppressor of cytokine signaling 2	89	1	0	0	1	0	0	0	0	0	mmu-miR-133c	-0.08	-0.08	ORF
ATRX	ENST00000373344.5	alpha thalassemia/mental retardation syndrome X-linked	77	1	0	0	1	0	0	0	0	0	mmu-miR-133a-3p.2	-0.08	-0.12	0.81	2009, 2011
KIAA1239	ENST00000309447.5	KIAA1239	5	1	0	0	1	0	0	0	0	0	mmu-miR-133a-3p.2	-0.08	-0.08	0.85	2011
MKL2	ENST00000318282.5	MKL/myocardin-like 2	992	1	0	0	1	1	0	0	1	1	mmu-miR-133a-3p.2	-0.08	-0.08	0.78	2009, 2011
TNIK	ENST00000436636.2	TRAF2 and NCK interacting kinase	106	1	0	0	1	2	0	2	0	0	mmu-miR-133a-3p.2	-0.08	-0.21	0.75
USP32	ENST00000300896.4	ubiquitin specific peptidase 32	85	1	0	1	0	0	0	0	0	0	mmu-miR-133c	-0.07	-0.2	0.69	2009, 2011
FOXP1	ENST00000318789.4	forkhead box P1	264	1	0	0	1	1	0	0	1	1	mmu-miR-133c	-0.07	-0.18	0.72	2009, 2011
NFAT5	ENST00000354436.2	nuclear factor of activated T-cells 5, tonicity-responsive	128	1	0	1	0	0	0	0	0	1	mmu-miR-133a-3p.2	-0.07	-0.18	0.94	2009, 2011
DNAJB1	ENST00000254322.2	DnaJ (Hsp40) homolog, subfamily B, member 1	29	1	0	0	1	0	0	0	0	1	mmu-miR-133a-3p.2	-0.07	-0.36	0.81	2009, 2011
SPTLC2	ENST00000216484.2	serine palmitoyltransferase, long chain base subunit 2	95	2	0	0	2	0	0	0	0	1	mmu-miR-133a-3p.2	-0.07	-0.22	0.96	2011
SLC30A5	ENST00000396591.3	solute carrier family 30 (zinc transporter), member 5	677	1	0	0	1	0	0	0	0	0	mmu-miR-133a-3p.2	-0.06	-0.19	0.85
DMXL1	ENST00000311085.8	Dmx-like 1	136	1	0	0	1	0	0	0	0	0	mmu-miR-133a-3p.2	-0.06	-0.17	0.86	2011
DAPK2	ENST00000261891.3	death-associated protein kinase 2	21	1	0	1	0	0	0	0	0	0	mmu-miR-133c	-0.06	-0.29	0.73	2011
STXBP6	ENST00000396700.1	syntaxin binding protein 6 (amisyn)	40	1	0	0	1	0	0	0	0	0	mmu-miR-133a-3p.2	-0.06	-0.22	0.73
ADCYAP1	ENST00000579794.1	adenylate cyclase activating polypeptide 1 (pituitary)	35	1	0	1	0	0	0	0	0	0	mmu-miR-133c	-0.06	-0.48	0.79	2009, 2011
CAMK1D	ENST00000378847.3	calcium/calmodulin-dependent protein kinase ID	258	1	0	0	1	2	0	0	2	1	mmu-miR-133a-3p.2	-0.06	-0.12	0.83
LIN7A	ENST00000552864.1	lin-7 homolog A (C. elegans)	86	1	0	0	1	0	0	0	0	1	mmu-miR-133a-3p.2	-0.05	-0.16	0.82
ID4	ENST00000378700.3	inhibitor of DNA binding 4, dominant negative helix-loop-helix protein	3400	1	0	0	1	0	0	0	0	0	mmu-miR-133c	-0.05	-0.25	0.7	2009, 2011
HIC2	ENST00000407464.2	hypermethylated in cancer 2	28	2	0	1	1	0	0	0	0	1	mmu-miR-133a-3p.2	-0.04	-0.26	0.89	2009, 2011
ZNF664	ENST00000538932.2	zinc finger protein 664	736	1	0	0	1	0	0	0	0	0	mmu-miR-133a-3p.2	-0.04	-0.11	0.55	2009, 2011
FOXK2	ENST00000335255.5	forkhead box K2	450	1	0	0	1	0	0	0	0	1	mmu-miR-133c	-0.04	-0.22	0.86	2009, 2011
RTN4RL1	ENST00000331238.6	reticulon 4 receptor-like 1	82	1	0	1	0	0	0	0	0	0	mmu-miR-133c	-0.04	-0.3	0.85	2009, 2011
SDC2	ENST00000302190.4	syndecan 2	774	1	0	0	1	1	1	0	0	0	mmu-miR-133a-3p.2	-0.04	-0.53	0.78
BAZ2A	ENST00000379441.3	bromodomain adjacent to zinc finger domain, 2A	48	1	0	1	0	0	0	0	0	0	mmu-miR-133a-3p.2	-0.03	-0.36	0.9	2009, 2011
PTPRT	ENST00000373187.1	protein tyrosine phosphatase, receptor type, T	5	1	0	0	1	0	0	0	0	3	mmu-miR-133a-3p.2	-0.03	-0.03	0.77	2009, 2011
SRGAP3	ENST00000383836.3	SLIT-ROBO Rho GTPase activating protein 3	38	1	0	0	1	1	0	0	1	0	mmu-miR-133c	-0.03	-0.18	0.84	2009, 2011
SRPK1	ENST00000373825.2	SRSF protein kinase 1	114	1	0	1	0	0	0	0	0	0	mmu-miR-133a-3p.2	-0.03	-0.17	0.62	2011
CALM1	ENST00000356978.4	calmodulin 1 (phosphorylase kinase, delta)	4046	1	0	1	0	0	0	0	0	0	mmu-miR-133a-3p.2	-0.03	-0.27	0.74	2009, 2011
EEF1A1	ENST00000316292.9	eukaryotic translation elongation factor 1 alpha 1	129	1	0	0	1	0	0	0	0	0	mmu-miR-133a-3p.2	-0.03	-0.28	0.86	2009, 2011
MCL1	ENST00000369026.2	myeloid cell leukemia sequence 1 (BCL2-related)	374	1	0	1	0	0	0	0	0	0	mmu-miR-133a-3p.2	-0.03	-0.32	0.87	2009, 2011
UNKL	ENST00000389221.4	unkempt homolog (Drosophila)-like	308	1	0	0	1	1	1	0	0	0	mmu-miR-133a-3p.2	-0.03	-0.35	0.83	2009, 2011
HHIP	ENST00000296575.3	hedgehog interacting protein	65	1	0	0	1	0	0	0	0	1	mmu-miR-133a-3p.2	-0.03	-0.07	0.86
LPHN1	ENST00000340736.6	latrophilin 1	49	1	0	0	1	0	0	0	0	1	mmu-miR-133a-3p.2	-0.02	-0.03	0.64
ESYT2	ENST00000251527.5	extended synaptotagmin-like protein 2	529	1	0	0	1	0	0	0	0	0	mmu-miR-133c	-0.02	-0.12	0.73	2009, 2011
FST	ENST00000396947.3	follistatin	53	1	0	0	1	0	0	0	0	0	mmu-miR-133c	-0.02	-0.23	0.79
MECP2	ENST00000303391.6	methyl CpG binding protein 2 (Rett syndrome)	1474	1	0	0	1	0	0	0	0	1	mmu-miR-133a-3p.2	-0.02	-0.1	0.65	2009
MFSD6	ENST00000392328.1	major facilitator superfamily domain containing 6	47	1	0	0	1	0	0	0	0	0	mmu-miR-133a-3p.2	-0.02	-0.1	0.75
FOXN3	ENST00000345097.4	forkhead box N3	42	1	0	0	1	0	0	0	0	0	mmu-miR-133c	-0.01	-0.12	0.64	2009, 2011
ACTR1A	ENST00000487599.1	ARP1 actin-related protein 1 homolog A, centractin alpha (yeast)	190	1	0	0	1	1	0	0	1	0	mmu-miR-133c	-0.01	-0.19	0.86	2009, 2011
PDE7A	ENST00000401827.3	phosphodiesterase 7A	84	1	0	0	1	0	0	0	0	0	mmu-miR-133a-3p.2	-0.01	-0.12	0.86	2011
CHD3	ENST00000380358.4	chromodomain helicase DNA binding protein 3	700	1	0	1	0	0	0	0	0	0	mmu-miR-133c	-0.01	-0.13	0.43
KIAA0232	ENST00000425103.1	KIAA0232	119	1	0	0	1	0	0	0	0	0	mmu-miR-133a-3p.2	-0.01	-0.23	0.77	2009, 2011
CTSV	ENST00000259470.5	cathepsin V	601	1	0	0	1	0	0	0	0	0	mmu-miR-133c	-0.01	-0.29	0.8
CSTF2	ENST00000415585.2	cleavage stimulation factor, 3' pre-RNA, subunit 2, 64kDa	385	1	0	1	0	0	0	0	0	1	mmu-miR-133c	-0.01	-0.33	0.55
DBNL	ENST00000494774.1	drebrin-like	1802	1	0	0	1	0	0	0	0	1	mmu-miR-133b-3p	0	-0.12	0.84	2009, 2011
SPTY2D1	ENST00000336349.5	SPT2, Suppressor of Ty, domain containing 1 (S. cerevisiae)	241	1	0	0	1	0	0	0	0	0	mmu-miR-133a-3p.2	0	-0.17	0.85	2009, 2011
ZBTB20	ENST00000462705.1	zinc finger and BTB domain containing 20	5	1	0	0	1	5	0	3	2	2	mmu-miR-133a-3p.2	0	-0.37	0.9
DDX3X	ENST00000399959.2	DEAD (Asp-Glu-Ala-Asp) box helicase 3, X-linked	965	1	0	0	1	0	0	0	0	0	mmu-miR-133a-3p.2	0	-0.15	0.81	2009, 2011
DLGAP3	ENST00000373347.1	discs, large (Drosophila) homolog-associated protein 3	8	1	0	1	0	0	0	0	0	0	mmu-miR-133a-3p.2	0	-0.23	0.94	2009, 2011
CACNA1B	ENST00000277551.2	calcium channel, voltage-dependent, N type, alpha 1B subunit	5	1	0	0	1	1	1	0	0	0	mmu-miR-133a-3p.2	0	-0.14	0.77	2011
TRIM55	ENST00000276573.7	tripartite motif containing 55	5	1	0	0	1	1*	0	0	0	0	mmu-miR-133a-3p.2	0	-0.11	0.58	2009, 2011
FTL	ENST00000331825.6	ferritin, light polypeptide	9158	1	0	1	0	0	0	0	0	0	mmu-miR-133a-3p.2	0	-0.53	0.91	2009, 2011
CCNT1	ENST00000261900.3	cyclin T1	86	1	0	0	1	0	0	0	0	0	mmu-miR-133a-3p.2	0	-0.12	0.84

## Sheet: miR-30c-5p
Ortholog of target gene	Representative transcript	Gene name	3P-seq tags + 5	Conserved sites total	Conserved 8mer sites	Conserved 7mer-m8 sites	Conserved 7mer-A1 sites	Poorly conserved sites total	Poorly conserved 8mer sites	Poorly conserved 7mer-m8 sites	Poorly conserved 7mer-A1 sites	6mer sites	Representative miRNA	Cumulative weighted context++ score	Total context++ score	Aggregate PCT	Previous TargetScan publication(s)
CELSR3	ENST00000164024.4	cadherin, EGF LAG seven-pass G-type receptor 3	13	4	4	0	0	1	0	1	0	0	mmu-miR-384-5p	-0.29	-0.31	> 0.99	2005, 2007, 2009, 2011
MKRN3	ENST00000314520.3	makorin ring finger protein 3	18	3	3	0	0	0	0	0	0	0	mmu-miR-30b-5p	-0.87	-0.87	0.97	2005, 2007, 2009, 2011
LIN28B	ENST00000345080.4	lin-28 homolog B (C. elegans)	118	3	3	0	0	0	0	0	0	0	mmu-miR-30b-5p	-0.68	-0.68	> 0.99	2007, 2009, 2011
STOX2	ENST00000308497.4	storkhead box 2	379	4	3	0	1	1	0	0	1	1	mmu-miR-30e-5p	-0.43	-0.43	> 0.99	2007, 2009, 2011
BRWD3	ENST00000373275.4	bromodomain and WD repeat domain containing 3	506	3	3	0	0	0	0	0	0	0	mmu-miR-384-5p	-0.16	-0.18	> 0.99	2011
PIP4K2A	ENST00000376573.4	phosphatidylinositol-5-phosphate 4-kinase, type II, alpha	632	3	2	0	1	1	0	0	1	0	mmu-miR-30b-5p	-0.69	-0.7	0.98	2005, 2007, 2009, 2011
MTDH	ENST00000336273.3	metadherin	5192	3	2	0	1	1	1	0	0	0	mmu-miR-30e-5p	-0.66	-0.83	> 0.99	2007, 2009, 2011
ZDHHC20	ENST00000320220.9	zinc finger, DHHC-type containing 20	1486	2	2	0	0	2	0	1	1	2	mmu-miR-30b-5p	-0.64	-0.64	0.97	2011
TNRC6A	ENST00000395799.3	trinucleotide repeat containing 6A	267	4	2	2	0	0	0	0	0	0	mmu-miR-30b-5p	-0.58	-0.58	> 0.99	2003, 2005, 2007, 2009, 2011
SPAST	ENST00000315285.3	spastin	239	3	2	0	1	1	0	1	0	1	mmu-miR-30e-5p	-0.56	-0.65	> 0.99	2005, 2007, 2009, 2011
RARG	ENST00000425354.2	retinoic acid receptor, gamma	21	2	2	0	0	0	0	0	0	0	mmu-miR-384-5p	-0.53	-0.53	0.97	2003, 2005, 2007, 2009, 2011
ZNRF1	ENST00000335325.4	zinc and ring finger 1, E3 ubiquitin protein ligase	519	2	2	0	0	0	0	0	0	0	mmu-miR-30b-5p	-0.51	-0.53	> 0.99	2005, 2007, 2009, 2011
PDE7A	ENST00000401827.3	phosphodiesterase 7A	84	2	2	0	0	0	0	0	0	0	mmu-miR-30e-5p	-0.47	-0.67	> 0.99	2011
WDR82	ENST00000296490.3	WD repeat domain 82	319	2	2	0	0	1	0	0	1	0	mmu-miR-30a-5p	-0.45	-0.55	0.99	2007, 2009, 2011
PLAGL2	ENST00000246229.4	pleiomorphic adenoma gene-like 2	254	3	2	0	1	0	0	0	0	0	mmu-miR-30a-5p	-0.41	-0.41	> 0.99	2003, 2005, 2007, 2009, 2011
PEX5L	ENST00000467460.1	peroxisomal biogenesis factor 5-like	5	2	2	0	0	0	0	0	0	0	mmu-miR-30e-5p	-0.41	-0.41	> 0.99
GNAI2	ENST00000313601.6	guanine nucleotide binding protein (G protein), alpha inhibiting activity polypeptide 2	27	2	2	0	0	0	0	0	0	0	mmu-miR-30b-5p	-0.41	-0.43	0.95	2003, 2005, 2007, 2009, 2011
GALNT7	ENST00000265000.4	UDP-N-acetyl-alpha-D-galactosamine:polypeptide N-acetylgalactosaminyltransferase 7 (GalNAc-T7)	953	2	2	0	0	0	0	0	0	0	mmu-miR-384-5p	-0.41	-0.41	0.99	2005, 2007, 2009, 2011
RGS17	ENST00000367225.2	regulator of G-protein signaling 17	11	2	2	0	0	1	0	1	0	1	mmu-miR-30e-5p	-0.39	-0.65	> 0.99
PPARGC1B	ENST00000309241.5	peroxisome proliferator-activated receptor gamma, coactivator 1 beta	12	4	2	2	0	1	0	0	1	1	mmu-miR-30e-5p	-0.36	-0.38	> 0.99	2003, 2005, 2007, 2009, 2011
TCF7	ENST00000518915.1	transcription factor 7 (T-cell specific, HMG-box)	883	2	2	0	0	0	0	0	0	0	mmu-miR-30e-5p	-0.33	-0.33	0.94	2009, 2011
NFATC3	ENST00000329524.4	nuclear factor of activated T-cells, cytoplasmic, calcineurin-dependent 3	221	2	2	0	0	1	0	1	0	0	mmu-miR-30a-5p	-0.29	-0.3	0.96	2011
TAOK1	ENST00000261716.3	TAO kinase 1	164	3	2	1	0	0	0	0	0	1	mmu-miR-30b-5p	-0.29	-0.3	> 0.99	2005, 2007, 2009, 2011
TLL2	ENST00000357947.3	tolloid-like 2	5	2	2	0	0	0	0	0	0	1	mmu-miR-384-5p	-0.25	-0.25	> 0.99	2005, 2007, 2009, 2011
JOSD1	ENST00000216039.5	Josephin domain containing 1	24	2	2	0	0	0	0	0	0	0	mmu-miR-30b-5p	-0.25	-0.6	> 0.99	2007, 2009, 2011
CAPN7	ENST00000253693.2	calpain 7	76	2	2	0	0	0	0	0	0	1	mmu-miR-384-5p	-0.25	-0.42	0.41	2005, 2007, 2009, 2011
WDR7	ENST00000254442.3	WD repeat domain 7	365	3	2	1	0	1	0	0	1	1	mmu-miR-30b-5p	-0.24	-0.27	0.99	2005, 2007, 2009, 2011
NCAM1	ENST00000316851.7	neural cell adhesion molecule 1	19	2	2	0	0	0	0	0	0	0	mmu-miR-384-5p	-0.23	-0.31	0.95	2005, 2007, 2009, 2011
SAMD8	ENST00000372687.4	sterile alpha motif domain containing 8	100	3	2	1	0	1	1	0	0	0	mmu-miR-384-5p	-0.22	-0.5	0.98	2011
SLC36A1	ENST00000243389.3	solute carrier family 36 (proton/amino acid symporter), member 1	236	2	2	0	0	2	0	1	1	0	mmu-miR-30e-5p	-0.17	-0.17	0.92	2005, 2007, 2009, 2011
LIMCH1	ENST00000313860.7	LIM and calponin homology domains 1	1058	2	2	0	0	0	0	0	0	0	mmu-miR-30b-5p	-0.15	-0.21	0.49	2009, 2011
BRWD1	ENST00000342449.3	bromodomain and WD repeat domain containing 1	96	2	2	0	0	2	0	1	1	0	mmu-miR-384-5p	-0.14	-0.23	0.98	2007, 2009, 2011
RFX3	ENST00000382004.3	regulatory factor X, 3 (influences HLA class II expression)	37	2	2	0	0	0	0	0	0	1	mmu-miR-30b-5p	-0.14	-0.2	0.52
DGKH	ENST00000261491.5	diacylglycerol kinase, eta	46	2	2	0	0	0	0	0	0	1	mmu-miR-30b-5p	-0.13	-0.21	> 0.99
MLXIP	ENST00000319080.7	MLX interacting protein	69	3	2	1	0	2	0	0	2	1	mmu-miR-30e-5p	-0.1	-0.21	> 0.99	2007, 2009, 2011
TNRC6B	ENST00000335727.9	trinucleotide repeat containing 6B	69	2	2	0	0	0	0	0	0	1	mmu-miR-30b-5p	-0.07	-0.09	0.96	2007, 2009, 2011
POLR3E	ENST00000299853.5	polymerase (RNA) III (DNA directed) polypeptide E (80kD)	1450	2	2	0	0	0	0	0	0	0	mmu-miR-30e-5p	-0.06	-0.7	> 0.99
SH3PXD2A	ENST00000369774.4	SH3 and PX domains 2A	152	2	2	0	0	0	0	0	0	1	mmu-miR-30b-5p	-0.05	-0.06	> 0.99	2007, 2009, 2011
SEC24A	ENST00000398844.2	SEC24 family, member A (S. cerevisiae)	679	2	2	0	0	1	0	0	1	0	mmu-miR-30a-5p	-0.04	-0.07	0.43	2007, 2009, 2011
TBL1XR1	ENST00000430069.1	transducin (beta)-like 1 X-linked receptor 1	334	2	2	0	0	0	0	0	0	1	mmu-miR-30b-5p	-0.03	-0.14	0.46
KLHL20	ENST00000209884.4	kelch-like family member 20	324	2	2	0	0	0	0	0	0	0	mmu-miR-384-5p	-0.02	-0.72	> 0.99	2003, 2005, 2007, 2009, 2011
FOSL2	ENST00000379619.1	FOS-like antigen 2	2255	2	2	0	0	0	0	0	0	0	mmu-miR-30a-5p	0	-0.16	0.96
CYP24A1	ENST00000216862.3	cytochrome P450, family 24, subfamily A, polypeptide 1	51	1	1	0	0	4	3	1	0	0	mmu-miR-384-5p	-0.87	-0.87	0.92	2005, 2007, 2009, 2011
GPR63	ENST00000229955.3	G protein-coupled receptor 63	5	2	1	0	1	2	0	2	0	1	mmu-miR-30e-5p	-0.76	-0.76	0.96
GABRB1	ENST00000295454.3	gamma-aminobutyric acid (GABA) A receptor, beta 1	5	2	1	1	0	2	0	1	1	0	mmu-miR-30e-5p	-0.74	-0.77	0.98	2009, 2011
SRSF7	ENST00000313117.6	serine/arginine-rich splicing factor 7	16077	1	1	0	0	0	0	0	0	0	mmu-miR-30a-5p	-0.73	-0.73	0.95	2005, 2007, 2009, 2011
PAPD4	ENST00000453514.1	PAP associated domain containing 4	434	2	1	1	0	0	0	0	0	0	mmu-miR-30e-5p	-0.73	-0.73	0.97	2005, 2007, 2011
LHX8	ENST00000294638.5	LIM homeobox 8	18	2	1	0	1	1	0	0	1	0	mmu-miR-30b-5p	-0.72	-0.77	0.95	2005, 2007, 2009, 2011
ASB3	ENST00000406625.2	Ankyrin repeat and SOCS box protein 3	317	1	1	0	0	1	0	1	0	0	mmu-miR-30b-5p	-0.66	-0.67	0.47
GPR75-ASB3	ENST00000263634.3	GPR75-ASB3 readthrough	317	1	1	0	0	1	0	1	0	0	mmu-miR-30b-5p	-0.66	-0.66	0.47	2005, 2007, 2009, 2011
LGI1	ENST00000371413.3	leucine-rich, glioma inactivated 1	5	1	1	0	0	0	0	0	0	0	mmu-miR-384-5p	-0.65	-0.65	0.89	2005, 2007, 2009, 2011
ACTC1	ENST00000290378.4	actin, alpha, cardiac muscle 1	164	1	1	0	0	1	1	0	0	1	mmu-miR-30b-5p	-0.6	-0.89	0.95	2011
LIN28A	ENST00000326279.6	lin-28 homolog A (C. elegans)	5	2	1	1	0	1	0	0	1	0	mmu-miR-30b-5p	-0.6	-0.6	> 0.99	2003, 2005, 2007, 2009, 2011
RFX6	ENST00000332958.2	regulatory factor X, 6	14	2	1	1	0	0	0	0	0	0	mmu-miR-30e-5p	-0.6	-0.6	0.99	2005, 2007, 2009, 2011
TWF1	ENST00000552521.1	twinfilin actin-binding protein 1	72	2	1	1	0	1	1	0	0	0	mmu-miR-30e-5p	-0.59	-0.59	0.87	2011
MEX3B	ENST00000558133.1	mex-3 RNA binding family member B	1401	2	1	1	0	0	0	0	0	0	mmu-miR-30e-5p	-0.59	-0.59	0.96	2005, 2007, 2009, 2011
FBXO45	ENST00000311630.6	F-box protein 45	72	2	1	1	0	0	0	0	0	0	mmu-miR-30e-5p	-0.58	-0.64	0.95	2009, 2011
CYSLTR1	ENST00000373304.3	cysteinyl leukotriene receptor 1	5	1	1	0	0	1	0	0	1	0	mmu-miR-30a-5p	-0.55	-0.55	0.36
SOCS1	ENST00000332029.2	suppressor of cytokine signaling 1	190	1	1	0	0	0	0	0	0	0	mmu-miR-384-5p	-0.54	-0.54	0.95	2005, 2007, 2009, 2011
RP11-160N1.10	ENST00000377548.2		5	1	1	0	0	0	0	0	0	0	mmu-miR-30e-5p	-0.54	-0.54	0.3
SPTSSB	ENST00000359175.4	serine palmitoyltransferase, small subunit B	15	1	1	0	0	0	0	0	0	1	mmu-miR-384-5p	-0.54	-0.54	0.13	2007, 2011
DESI2	ENST00000302550.11	desumoylating isopeptidase 2	147	2	1	0	1	1	0	0	1	0	mmu-miR-30b-5p	-0.52	-0.52	0.99	2011
COQ3	ENST00000254759.3	coenzyme Q3 methyltransferase	108	1	1	0	0	0	0	0	0	0	mmu-miR-30b-5p	-0.52	-0.52	< 0.1	2009, 2011
SLC7A10	ENST00000253188.4	solute carrier family 7 (neutral amino acid transporter light chain, asc system), member 10	99	1	1	0	0	0	0	0	0	0	mmu-miR-30a-5p	-0.51	-0.53	0.95	2005, 2007, 2009, 2011
RRAD	ENST00000420652.1	Ras-related associated with diabetes	28	1	1	0	0	0	0	0	0	0	mmu-miR-30b-5p	-0.51	-0.51	0.92	2005, 2007, 2009, 2011
CAMK2N1	ENST00000375078.3	calcium/calmodulin-dependent protein kinase II inhibitor 1	6631	1	1	0	0	0	0	0	0	0	mmu-miR-30b-5p	-0.51	-0.51	0.95	2007, 2009, 2011
GSKIP	ENST00000555181.1	GSK3B interacting protein	1581	1	1	0	0	0	0	0	0	1	mmu-miR-384-5p	-0.51	-0.51	0.95	2007, 2009, 2011
SYNGR3	ENST00000562045.1	synaptogyrin 3	223	1	1	0	0	0	0	0	0	0	mmu-miR-30b-5p	-0.51	-0.52	0.92	2005, 2007, 2009, 2011
RHEBL1	ENST00000301068.6	Ras homolog enriched in brain like 1	21	1	1	0	0	0	0	0	0	0	mmu-miR-30b-5p	-0.5	-0.5	0.82	2005, 2007, 2009, 2011
KLHL28	ENST00000396128.4	kelch-like family member 28	9	4	1	1	2	1	0	0	1	1	mmu-miR-384-5p	-0.5	-1.19	> 0.99	2007, 2009, 2011
LMBR1L	ENST00000267102.8	limb development membrane protein 1-like	346	1	1	0	0	1	0	0	1	0	mmu-miR-30e-5p	-0.5	-0.5	0.98	2007, 2009, 2011
MIER3	ENST00000381226.3	mesoderm induction early response 1, family member 3	112	3	1	1	1	1	0	0	1	2	mmu-miR-384-5p	-0.48	-0.51	0.99	2007, 2009, 2011
UBE2I	ENST00000355803.4	ubiquitin-conjugating enzyme E2I	291	1	1	0	0	0	0	0	0	0	mmu-miR-30e-5p	-0.47	-0.47	0.95	2005, 2007, 2009, 2011
RUNX2	ENST00000371432.3	runt-related transcription factor 2	105	2	1	1	0	2	0	1	1	1	mmu-miR-30a-5p	-0.47	-0.47	0.94	2007, 2009, 2011
CTHRC1	ENST00000330295.5	collagen triple helix repeat containing 1	1504	1	1	0	0	0	0	0	0	0	mmu-miR-30a-5p	-0.47	-0.48	< 0.1	2009, 2011
DENND2C	ENST00000393276.3	DENN/MADD domain containing 2C	51	1	1	0	0	1	1	0	0	1	mmu-miR-30e-5p	-0.47	-0.47	0.89
FAM43A	ENST00000329759.4	family with sequence similarity 43, member A	287	2	1	1	0	0	0	0	0	0	mmu-miR-30d-5p	-0.47	-0.47	0.98	2003, 2005, 2007, 2009, 2011
BECN1	ENST00000438274.3	beclin 1, autophagy related	2879	1	1	0	0	0	0	0	0	0	mmu-miR-30e-5p	-0.47	-0.47	0.92	2005, 2007, 2009, 2011
CAPN5	ENST00000531028.1	calpain 5	89	1	1	0	0	1	0	1	0	0	mmu-miR-30b-5p	-0.47	-0.61	0.94	2005, 2007, 2009, 2011
TMEM121	ENST00000392519.2	transmembrane protein 121	7	1	1	0	0	0	0	0	0	0	mmu-miR-384-5p	-0.46	-0.46	0.92	2007, 2009, 2011
RAPGEF4	ENST00000409036.1	Rap guanine nucleotide exchange factor (GEF) 4	60	1	1	0	0	1	0	1	0	0	mmu-miR-384-5p	-0.46	-0.46	0.95	2005, 2007, 2009, 2011
FAP	ENST00000188790.4	fibroblast activation protein, alpha	618	1	1	0	0	0	0	0	0	0	mmu-miR-30d-5p	-0.46	-0.46	0.87	2005, 2007, 2009, 2011
TFDP1	ENST00000375370.5	transcription factor Dp-1	8913	1	1	0	0	0	0	0	0	1	mmu-miR-384-5p	-0.46	-0.46	0.75	2005, 2007, 2009, 2011
DLGAP1	ENST00000400145.2	discs, large (Drosophila) homolog-associated protein 1	8	1	1	0	0	0	0	0	0	0	mmu-miR-30b-5p	-0.46	-0.46	0.63	2011
ZFAND5	ENST00000237937.3	zinc finger, AN1-type domain 5	2522	1	1	0	0	0	0	0	0	0	mmu-miR-384-5p	-0.46	-0.47	0.95	2007, 2009, 2011
COL9A3	ENST00000343916.3	collagen, type IX, alpha 3	37	1	1	0	0	0	0	0	0	0	mmu-miR-30e-5p	-0.46	-0.46	0.59	2009, 2011
CCDC71L	ENST00000523505.1	coiled-coil domain containing 71-like	410	1	1	0	0	0	0	0	0	0	mmu-miR-30a-5p	-0.46	-0.46	0.91	2009, 2011
PDSS2	ENST00000369031.4	prenyl (decaprenyl) diphosphate synthase, subunit 2	42	1	1	0	0	0	0	0	0	0	mmu-miR-384-5p	-0.46	-0.46	0.54	2009, 2011
CDC37L1	ENST00000381854.3	cell division cycle 37-like 1	280	1	1	0	0	0	0	0	0	0	mmu-miR-30e-5p	-0.45	-0.45	0.95	2005, 2007, 2009, 2011
SOCS3	ENST00000330871.2	suppressor of cytokine signaling 3	5	1	1	0	0	0	0	0	0	0	mmu-miR-30b-5p	-0.44	-0.44	0.95	2005, 2007, 2009, 2011
FOXD1	ENST00000499003.3	forkhead box D1	423	1	1	0	0	2	1	0	1	0	mmu-miR-384-5p	-0.44	-0.52	0.95	2005, 2007, 2009, 2011
RASA1	ENST00000456692.2	RAS p21 protein activator (GTPase activating protein) 1	1700	1	1	0	0	1	0	1	0	0	mmu-miR-30b-5p	-0.44	-0.59	0.95	2005, 2007, 2009, 2011
CHD1	ENST00000284049.3	chromodomain helicase DNA binding protein 1	35	2	1	1	0	0	0	0	0	0	mmu-miR-384-5p	-0.44	-0.44	0.99	2009, 2011
JDP2	ENST00000435893.2	Jun dimerization protein 2	110	1	1	0	0	0	0	0	0	1	mmu-miR-30e-5p	-0.44	-0.44	0.95	2005, 2007, 2009, 2011
TMEM181	ENST00000367090.3	transmembrane protein 181	924	2	1	0	1	1	0	0	1	0	mmu-miR-30b-5p	-0.44	-0.44	> 0.99	2009, 2011
VIP	ENST00000367244.3	vasoactive intestinal peptide	5	1	1	0	0	0	0	0	0	0	mmu-miR-30b-5p	-0.44	-0.44	0.73	2005, 2007, 2009, 2011
FLJ20373	ENST00000414004.2		75	1	1	0	0	0	0	0	0	0	mmu-miR-30d-5p	-0.43	-0.43	0.95
NR4A2	ENST00000409108.2	nuclear receptor subfamily 4, group A, member 2	1631	1	1	0	0	0	0	0	0	0	mmu-miR-30e-5p	-0.43	-0.44	0.83	2005, 2007, 2009, 2011
FAM49A	ENST00000381323.3	family with sequence similarity 49, member A	38	1	1	0	0	0	0	0	0	0	mmu-miR-30b-5p	-0.43	-0.43	0.95	2005, 2007, 2009, 2011
OMG	ENST00000247271.4	oligodendrocyte myelin glycoprotein	5	1	1	0	0	0	0	0	0	0	mmu-miR-30b-5p	-0.43	-0.43	0.26	2005, 2007, 2009, 2011
C9orf72	ENST00000380003.3	chromosome 9 open reading frame 72	25	2	1	0	1	0	0	0	0	0	mmu-miR-384-5p	-0.43	-0.43	0.97	2005, 2007, 2009, 2011
PFN2	ENST00000239940.7	profilin 2	2184	1	1	0	0	0	0	0	0	0	mmu-miR-30e-5p	-0.43	-0.44	0.9	2007, 2009, 2011
EVX2	ENST00000308618.4	even-skipped homeobox 2	9	2	1	0	1	0	0	0	0	0	mmu-miR-30e-5p	-0.42	-0.42	0.98
ANO4	ENST00000392979.3	anoctamin 4	128	2	1	1	0	0	0	0	0	0	mmu-miR-384-5p	-0.42	-0.42	0.95	2005, 2007, 2009, 2011
USP45	ENST00000392738.2	ubiquitin specific peptidase 45	491	1	1	0	0	2	0	0	2	0	mmu-miR-384-5p	-0.42	-0.44	0.96	2007, 2009, 2011
ANKHD1	ENST00000360839.2	ankyrin repeat and KH domain containing 1	247	1	1	0	0	0	0	0	0	0	mmu-miR-30b-5p	-0.42	-0.42	0.95	2005, 2007, 2009, 2011
EDNRA	ENST00000339690.5	endothelin receptor type A	35	1	1	0	0	1	0	0	1	0	mmu-miR-30a-5p	-0.42	-0.42	0.95	2005, 2007, 2009, 2011
RAP1B	ENST00000250559.9	RAP1B, member of RAS oncogene family	3599	1	1	0	0	0	0	0	0	1	mmu-miR-384-5p	-0.42	-0.49	0.81	2005, 2007, 2009, 2011
SHOC2	ENST00000369452.4	soc-2 suppressor of clear homolog (C. elegans)	437	1	1	0	0	0	0	0	0	0	mmu-miR-384-5p	-0.41	-0.41	0.95	2011
SNAI1	ENST00000244050.2	snail family zinc finger 1	486	1	1	0	0	0	0	0	0	0	mmu-miR-30b-5p	-0.41	-0.41	0.95	2005, 2007, 2009, 2011
AP4E1	ENST00000261842.5	adaptor-related protein complex 4, epsilon 1 subunit	57	2	1	0	1	0	0	0	0	0	mmu-miR-30e-5p	-0.41	-0.41	0.95	2005, 2007, 2009, 2011
KIAA1715	ENST00000272748.4	KIAA1715	858	1	1	0	0	1	1	0	0	0	mmu-miR-384-5p	-0.41	-0.5	0.77	2009, 2011
CAPZA1	ENST00000263168.3	capping protein (actin filament) muscle Z-line, alpha 1	1159	1	1	0	0	0	0	0	0	0	mmu-miR-30e-5p	-0.41	-0.41	0.94	2005, 2007, 2009, 2011
RNF122	ENST00000256257.1	ring finger protein 122	16	1	1	0	0	0	0	0	0	0	mmu-miR-30e-5p	-0.41	-0.41	0.93	2005, 2007, 2009, 2011
ATG5	ENST00000360666.4	autophagy related 5	1078	1	1	0	0	0	0	0	0	0	mmu-miR-30b-5p	-0.41	-0.41	0.72	2007, 2009, 2011
JPH4	ENST00000356300.4	junctophilin 4	5	1	1	0	0	1	0	1	0	0	mmu-miR-30e-5p	-0.41	-0.41	0.92	2005, 2007, 2009, 2011
ZNF608	ENST00000504926.1	zinc finger protein 608	22	1	1	0	0	0	0	0	0	0	mmu-miR-30a-5p	-0.4	-0.4	0.9	2005, 2007, 2009, 2011
MDM4	ENST00000391947.2	Mdm4 p53 binding protein homolog (mouse)	443	1	1	0	0	1	0	1	0	0	mmu-miR-30b-5p	-0.4	-0.42	0.81	2011
GNPDA1	ENST00000311337.6	glucosamine-6-phosphate deaminase 1	1130	1	1	0	0	0	0	0	0	0	mmu-miR-30e-5p	-0.4	-0.41	0.86	2009, 2011
CARS	ENST00000278224.9	cysteinyl-tRNA synthetase	594	1	1	0	0	0	0	0	0	0	mmu-miR-384-5p	-0.4	-0.4	0.85	2011
NAALADL2	ENST00000454872.1	N-acetylated alpha-linked acidic dipeptidase-like 2	5	1	1	0	0	0	0	0	0	0	mmu-miR-30e-5p	-0.4	-0.4	0.95	2005, 2007, 2009, 2011
NRXN3	ENST00000281127.7	neurexin 3	14	1	1	0	0	0	0	0	0	0	mmu-miR-30e-5p	-0.4	-0.4	0.95	2005, 2007, 2009, 2011
MSANTD3-TMEFF1	ENST00000502978.1	MSANTD3-TMEFF1 readthrough	234	1	1	0	0	0	0	0	0	0	mmu-miR-30a-5p	-0.4	-0.4	0.9	2011
VAT1L	ENST00000302536.2	vesicle amine transport 1-like	123	1	1	0	0	0	0	0	0	0	mmu-miR-30e-5p	-0.39	-0.43	0.95	2005, 2007, 2009, 2011
INO80D	ENST00000403263.1	INO80 complex subunit D	5	2	1	0	1	1	0	0	1	0	mmu-miR-30b-5p	-0.39	-0.39	0.93	2009, 2011
TMCC1	ENST00000432054.2	transmembrane and coiled-coil domain family 1	97	1	1	0	0	2	0	0	2	0	mmu-miR-30b-5p	-0.39	-0.41	0.95	2005, 2007, 2009, 2011
DNAJC13	ENST00000260818.6	DnaJ (Hsp40) homolog, subfamily C, member 13	256	1	1	0	0	0	0	0	0	0	mmu-miR-384-5p	-0.39	-0.39	0.83	2005, 2007, 2009, 2011
STAC	ENST00000273183.3	SH3 and cysteine rich domain	172	1	1	0	0	0	0	0	0	0	mmu-miR-30b-5p	-0.39	-0.39	0.91	2005, 2007, 2009, 2011
EAF1	ENST00000396842.2	ELL associated factor 1	63	1	1	0	0	0	0	0	0	1	mmu-miR-30b-5p	-0.39	-0.41	0.94	2005, 2007, 2009, 2011
SLC30A4	ENST00000261867.4	solute carrier family 30 (zinc transporter), member 4	19	1	1	0	0	3	0	2	1	1	mmu-miR-30e-5p	-0.39	-0.44	0.95	2009, 2011
TMEFF1	ENST00000374879.4	transmembrane protein with EGF-like and two follistatin-like domains 1	234	1	1	0	0	0	0	0	0	0	mmu-miR-30a-5p	-0.39	-0.39	0.9	2005, 2007, 2009, 2011
LHX9	ENST00000367390.3	LIM homeobox 9	40	3	1	0	2	1	0	0	1	0	mmu-miR-384-5p	-0.39	-0.56	0.98
SCN9A	ENST00000409672.1	sodium channel, voltage-gated, type IX, alpha subunit	240	1	1	0	0	1	1	0	0	0	mmu-miR-30b-5p	-0.38	-0.47	0.94	2011
TMEM87A	ENST00000389834.4	transmembrane protein 87A	52	1	1	0	0	0	0	0	0	0	mmu-miR-30b-5p	-0.38	-0.43	0.76	2007, 2009, 2011
TASP1	ENST00000337743.4	taspase, threonine aspartase, 1	58	1	1	0	0	0	0	0	0	0	mmu-miR-30b-5p	-0.38	-0.38	0.48	2007, 2009, 2011
MICAL1	ENST00000358807.3	microtubule associated monooxygenase, calponin and LIM domain containing 1	249	1	1	0	0	0	0	0	0	0	mmu-miR-30a-5p	-0.38	-0.38	< 0.1	2005, 2007, 2009, 2011
CCNE2	ENST00000520509.1	cyclin E2	76	1	1	0	0	1	0	1	0	0	mmu-miR-384-5p	-0.38	-0.5	0.42	2005, 2007, 2009, 2011
STIM2	ENST00000467011.1	stromal interaction molecule 2	380	3	1	1	1	0	0	0	0	0	mmu-miR-384-5p	-0.38	-0.38	> 0.99	2003, 2005, 2007, 2009, 2011
C4orf19	ENST00000381980.4	chromosome 4 open reading frame 19	51	1	1	0	0	0	0	0	0	0	mmu-miR-30b-5p	-0.38	-0.38	0.47	2009, 2011
ELMOD2	ENST00000323570.3	ELMO/CED-12 domain containing 2	32	1	1	0	0	0	0	0	0	0	mmu-miR-30b-5p	-0.37	-0.37	0.95	2005, 2007, 2009, 2011
YPEL2	ENST00000312655.4	yippee-like 2 (Drosophila)	62	2	1	0	1	0	0	0	0	0	mmu-miR-30b-5p	-0.37	-0.37	0.99	2005, 2007, 2009, 2011
COL13A1	ENST00000398974.3	collagen, type XIII, alpha 1	628	1	1	0	0	0	0	0	0	0	mmu-miR-30a-5p	-0.37	-0.43	0.95	2005, 2007, 2009, 2011
SNAPIN	ENST00000368685.5	SNAP-associated protein	1843	1	1	0	0	0	0	0	0	0	mmu-miR-30a-5p	-0.37	-0.41	0.32	2009, 2011
AVL9	ENST00000318709.4	AVL9 homolog (S. cerevisiase)	246	2	1	1	0	0	0	0	0	0	mmu-miR-30b-5p	-0.37	-0.4	0.65	2005, 2007, 2009, 2011
RAB15	ENST00000436278.2	RAB15, member RAS oncogene family	23	1	1	0	0	0	0	0	0	0	mmu-miR-30e-5p	-0.37	-0.49	0.95	2005, 2007, 2009, 2011
LHX1	ENST00000254457.5	LIM homeobox 1	15	2	1	1	0	0	0	0	0	0	mmu-miR-30e-5p	-0.37	-0.37	0.97	2011
TMEM170B	ENST00000379426.1	transmembrane protein 170B	489	1	1	0	0	2	1	1	0	0	mmu-miR-30b-5p	-0.36	-0.75	0.94	2009, 2011
FAM199X	ENST00000493442.1	family with sequence similarity 199, X-linked	856	2	1	0	1	0	0	0	0	3	mmu-miR-30e-5p	-0.36	-0.38	0.91	2009, 2011
SOS1	ENST00000426016.1	son of sevenless homolog 1 (Drosophila)	189	1	1	0	0	0	0	0	0	1	mmu-miR-30a-5p	-0.36	-0.36	0.75	2011
CCDC43	ENST00000457422.2	coiled-coil domain containing 43	36	1	1	0	0	0	0	0	0	0	mmu-miR-30a-5p	-0.36	-0.36	0.93	2007, 2009, 2011
RAB38	ENST00000243662.6	RAB38, member RAS oncogene family	11	1	1	0	0	0	0	0	0	0	mmu-miR-30e-5p	-0.36	-0.36	0.91	2005, 2007, 2009, 2011
SPEN	ENST00000375759.3	spen homolog, transcriptional regulator (Drosophila)	7	2	1	0	1	0	0	0	0	0	mmu-miR-30b-5p	-0.35	-0.41	0.99	2005, 2007, 2009, 2011
KIAA2026	ENST00000399933.3	KIAA2026	712	1	1	0	0	0	0	0	0	0	mmu-miR-30b-5p	-0.35	-0.35	0.87	2007, 2009, 2011
FAM91A1	ENST00000334705.7	family with sequence similarity 91, member A1	731	1	1	0	0	0	0	0	0	0	mmu-miR-30e-5p	-0.35	-0.35	0.78	2007, 2009, 2011
DDAH1	ENST00000535924.2	dimethylarginine dimethylaminohydrolase 1	46	1	1	0	0	1	0	1	0	0	mmu-miR-384-5p	-0.35	-0.35	0.33	2005, 2007, 2009, 2011
CHST2	ENST00000309575.3	carbohydrate (N-acetylglucosamine-6-O) sulfotransferase 2	154	1	1	0	0	0	0	0	0	0	mmu-miR-30e-5p	-0.35	-0.45	0.94	2005, 2007, 2009, 2011
GATM	ENST00000396659.3	glycine amidinotransferase (L-arginine:glycine amidinotransferase)	586	1	1	0	0	0	0	0	0	0	mmu-miR-384-5p	-0.35	-0.35	0.31	2009, 2011
YTHDC1	ENST00000344157.4	YTH domain containing 1	307	1	1	0	0	0	0	0	0	0	mmu-miR-30b-5p	-0.35	-0.48	0.95	2007, 2009, 2011
SEPT7	ENST00000435235.1	septin 7	97	1	1	0	0	0	0	0	0	0	mmu-miR-30b-5p	-0.34	-0.34	0.95	2005, 2007, 2009, 2011
SEMA6B	ENST00000301293.3	sema domain, transmembrane domain (TM), and cytoplasmic domain, (semaphorin) 6B	35	1	1	0	0	0	0	0	0	0	mmu-miR-30e-5p	-0.34	-0.34	0.93	2009, 2011
ANKRD17	ENST00000358602.4	ankyrin repeat domain 17	1334	1	1	0	0	0	0	0	0	0	mmu-miR-30b-5p	-0.34	-0.36	0.95	2005, 2007, 2009, 2011
QKI	ENST00000392127.2	QKI, KH domain containing, RNA binding	323	1	1	0	0	1	0	0	1	1	mmu-miR-30e-5p	-0.34	-0.36	0.9	2005, 2007, 2009, 2011
USP48	ENST00000400301.1	ubiquitin specific peptidase 48	3036	1	1	0	0	0	0	0	0	0	mmu-miR-30b-5p	-0.34	-0.42	0.9	2005, 2007, 2009, 2011
EPC2	ENST00000258484.6	enhancer of polycomb homolog 2 (Drosophila)	152	1	1	0	0	0	0	0	0	0	mmu-miR-30b-5p	-0.34	-0.34	0.9	2005, 2007, 2009, 2011
MAML1	ENST00000292599.3	mastermind-like 1 (Drosophila)	910	1	1	0	0	0	0	0	0	0	mmu-miR-30b-5p	-0.34	-0.34	0.95	2005, 2007, 2009, 2011
CCNT2	ENST00000295238.6	cyclin T2	381	2	1	0	1	0	0	0	0	0	mmu-miR-30e-5p	-0.34	-0.34	0.99	2005, 2007, 2009, 2011
MBOAT1	ENST00000541730.1	membrane bound O-acyltransferase domain containing 1	98	1	1	0	0	0	0	0	0	0	mmu-miR-30a-5p	-0.34	-0.34	0.91	2007, 2009, 2011
SLC41A2	ENST00000258538.3	solute carrier family 41 (magnesium transporter), member 2	224	1	1	0	0	0	0	0	0	1	mmu-miR-384-5p	-0.34	-0.49	0.64	2005, 2007, 2009, 2011
PTP4A1	ENST00000370651.3	protein tyrosine phosphatase type IVA, member 1	5740	1	1	0	0	0	0	0	0	0	mmu-miR-384-5p	-0.34	-0.34	0.92	2005, 2007, 2009, 2011
NDEL1	ENST00000402554.3	nudE neurodevelopment protein 1-like 1	396	1	1	0	0	0	0	0	0	0	mmu-miR-30b-5p	-0.34	-0.34	0.73	2005, 2007, 2009, 2011
PGP	ENST00000333503.7	phosphoglycolate phosphatase	153	1	1	0	0	0	0	0	0	0	mmu-miR-30d-5p	-0.34	-0.34	0.94	2007, 2009, 2011
SKP2	ENST00000274255.6	S-phase kinase-associated protein 2, E3 ubiquitin protein ligase	340	1	1	0	0	0	0	0	0	0	mmu-miR-30b-5p	-0.34	-0.34	0.75
STX2	ENST00000392373.2	syntaxin 2	216	1	1	0	0	0	0	0	0	0	mmu-miR-30a-5p	-0.34	-0.43	0.73	2007, 2009, 2011
UBE2J1	ENST00000435041.2	ubiquitin-conjugating enzyme E2, J1	1318	1	1	0	0	0	0	0	0	0	mmu-miR-384-5p	-0.34	-0.52	0.95	2005, 2007, 2009, 2011
KIAA0408	ENST00000483725.3	KIAA0408	95	1	1	0	0	1	0	0	1	0	mmu-miR-30a-5p	-0.33	-0.34	0.78	2011
CALCR	ENST00000359558.2	calcitonin receptor	5	1	1	0	0	1	0	1	0	0	mmu-miR-30c-5p	-0.33	-0.33	0.78	2005, 2007, 2009, 2011
KDM3A	ENST00000409556.1	lysine (K)-specific demethylase 3A	2300	1	1	0	0	1	0	1	0	0	mmu-miR-384-5p	-0.33	-0.46	0.95	2005, 2007, 2009, 2011
UBE3C	ENST00000348165.5	ubiquitin protein ligase E3C	1332	1	1	0	0	0	0	0	0	0	mmu-miR-30b-5p	-0.33	-0.33	0.91	2005, 2007, 2009, 2011
ABL1	ENST00000318560.5	c-abl oncogene 1, non-receptor tyrosine kinase	1188	1	1	0	0	0	0	0	0	0	mmu-miR-384-5p	-0.33	-0.33	0.89	2005, 2007, 2009, 2011
GALNT1	ENST00000269195.5	UDP-N-acetyl-alpha-D-galactosamine:polypeptide N-acetylgalactosaminyltransferase 1 (GalNAc-T1)	2466	1	1	0	0	0	0	0	0	1	mmu-miR-30b-5p	-0.33	-0.38	0.95	2005, 2007, 2009, 2011
EXTL2	ENST00000370113.3	exostosin-like glycosyltransferase 2	204	1	1	0	0	0	0	0	0	0	mmu-miR-30b-5p	-0.33	-0.33	0.8	2005, 2007, 2009, 2011
ITGA8	ENST00000378076.3	integrin, alpha 8	7	1	1	0	0	1	0	0	1	1	mmu-miR-384-5p	-0.33	-0.41	0.99
SLC35C1	ENST00000314134.3	solute carrier family 35 (GDP-fucose transporter), member C1	856	1	1	0	0	0	0	0	0	0	mmu-miR-30b-5p	-0.33	-0.33	< 0.1	2011
ATP6V0D1	ENST00000290949.3	ATPase, H+ transporting, lysosomal 38kDa, V0 subunit d1	4359	1	1	0	0	0	0	0	0	0	mmu-miR-30a-5p	-0.33	-0.33	0.91	2009, 2011
TBC1D10B	ENST00000409939.3	TBC1 domain family, member 10B	174	1	1	0	0	0	0	0	0	0	mmu-miR-30b-5p	-0.33	-0.33	0.82	2005, 2007, 2009, 2011
DCUN1D3	ENST00000324344.4	DCN1, defective in cullin neddylation 1, domain containing 3	53	3	1	1	1	0	0	0	0	0	mmu-miR-30b-5p	-0.32	-0.59	> 0.99	2007, 2009, 2011
LARP4	ENST00000398473.2	La ribonucleoprotein domain family, member 4	35	1	1	0	0	2	0	1	1	1	mmu-miR-384-5p	-0.32	-0.38	0.38	2007, 2009, 2011
PICALM	ENST00000532317.1	phosphatidylinositol binding clathrin assembly protein	1173	1	1	0	0	0	0	0	0	0	mmu-miR-384-5p	-0.32	-0.33	0.32	2005, 2007, 2009, 2011
GLCCI1	ENST00000223145.5	glucocorticoid induced transcript 1	654	1	1	0	0	0	0	0	0	0	mmu-miR-30e-5p	-0.32	-0.32	0.88	2005, 2007, 2009, 2011
DCUN1D1	ENST00000292782.4	DCN1, defective in cullin neddylation 1, domain containing 1	267	1	1	0	0	2	1	1	0	2	mmu-miR-30b-5p	-0.32	-0.46	0.95
ESCO1	ENST00000269214.5	establishment of sister chromatid cohesion N-acetyltransferase 1	94	1	1	0	0	0	0	0	0	0	mmu-miR-384-5p	-0.32	-0.32	0.95	2005, 2007, 2009, 2011
KCTD16	ENST00000507359.3	potassium channel tetramerization domain containing 16	36	2	1	1	0	5	2	3	0	1	mmu-miR-30e-5p	-0.32	-0.47	0.99
RNF220	ENST00000372247.2	ring finger protein 220	474	1	1	0	0	0	0	0	0	0	mmu-miR-30b-5p	-0.32	-0.32	0.95	2007, 2009, 2011
LRFN2	ENST00000338305.6	leucine rich repeat and fibronectin type III domain containing 2	5	1	1	0	0	0	0	0	0	0	mmu-miR-30a-5p	-0.32	-0.32	0.82	2005, 2007, 2009, 2011
WDR44	ENST00000254029.3	WD repeat domain 44	392	1	1	0	0	0	0	0	0	0	mmu-miR-30b-5p	-0.32	-0.33	0.81	2005, 2007, 2009, 2011
VOPP1	ENST00000285279.5	vesicular, overexpressed in cancer, prosurvival protein 1	82	1	1	0	0	1	0	1	0	0	mmu-miR-30a-5p	-0.32	-0.32	0.92	2007, 2009, 2011
MINOS1	ENST00000322753.6	mitochondrial inner membrane organizing system 1	287	1	1	0	0	0	0	0	0	0	mmu-miR-30e-5p	-0.32	-0.39	0.37	2011
FAM110B	ENST00000361488.3	family with sequence similarity 110, member B	60	1	1	0	0	1	0	1	0	0	mmu-miR-30e-5p	-0.31	-0.39	0.95	2007, 2009, 2011
B4GALT6	ENST00000306851.5	UDP-Gal:betaGlcNAc beta 1,4- galactosyltransferase, polypeptide 6	146	1	1	0	0	0	0	0	0	0	mmu-miR-30a-5p	-0.31	-0.31	0.94	2005, 2007, 2009, 2011
SLC35F1	ENST00000360388.4	solute carrier family 35, member F1	56	1	1	0	0	0	0	0	0	0	mmu-miR-384-5p	-0.31	-0.31	0.95	2007, 2009, 2011
IP6K3	ENST00000451316.1	inositol hexakisphosphate kinase 3	8	1	1	0	0	0	0	0	0	0	mmu-miR-30e-5p	-0.31	-0.31	0.95	2005, 2007, 2009, 2011
FAM214A	ENST00000261844.7	family with sequence similarity 214, member A	62	1	1	0	0	0	0	0	0	0	mmu-miR-30a-5p	-0.31	-0.31	0.88	2007, 2009, 2011
JAKMIP2	ENST00000507386.1	janus kinase and microtubule interacting protein 2	26	1	1	0	0	0	0	0	0	0	mmu-miR-30e-5p	-0.31	-0.31	0.95	2007, 2009, 2011
MMD	ENST00000262065.3	monocyte to macrophage differentiation-associated	558	1	1	0	0	0	0	0	0	0	mmu-miR-30e-5p	-0.31	-0.31	0.63	2005, 2007, 2009, 2011
UBE2QL1	ENST00000399816.3	ubiquitin-conjugating enzyme E2Q family-like 1	10	1	1	0	0	1	0	0	1	0	mmu-miR-30a-5p	-0.31	-0.36	0.95	2011
MBTPS2	ENST00000379484.5	membrane-bound transcription factor peptidase, site 2	1711	1	1	0	0	0	0	0	0	1	mmu-miR-384-5p	-0.31	-0.31	0.81	2011
NAGPA	ENST00000312251.3	N-acetylglucosamine-1-phosphodiester alpha-N-acetylglucosaminidase	297	1	1	0	0	0	0	0	0	0	mmu-miR-30a-5p	-0.3	-0.3	0.74	2005, 2007, 2009, 2011
B3GNT5	ENST00000326505.3	UDP-GlcNAc:betaGal beta-1,3-N-acetylglucosaminyltransferase 5	57	1	1	0	0	0	0	0	0	0	mmu-miR-384-5p	-0.3	-0.3	0.72	2005, 2007, 2009, 2011
CLRN1	ENST00000327047.1	clarin 1	5	1	1	0	0	0	0	0	0	0	mmu-miR-30b-5p	-0.3	-0.3	0.2	2011
KLF9	ENST00000377126.2	Kruppel-like factor 9	20	2	1	1	0	0	0	0	0	0	mmu-miR-30d-5p	-0.3	-0.46	0.82	2005, 2007, 2009, 2011
SOX9	ENST00000245479.2	SRY (sex determining region Y)-box 9	2595	1	1	0	0	0	0	0	0	0	mmu-miR-30b-5p	-0.3	-0.35	0.43	2005, 2007, 2009, 2011
NFAT5	ENST00000354436.2	nuclear factor of activated T-cells 5, tonicity-responsive	128	3	1	1	1	1	1	0	0	0	mmu-miR-30b-5p	-0.3	-0.42	0.97	2005, 2007, 2009, 2011
CADM2	ENST00000383699.3	cell adhesion molecule 2	5	2	1	0	1	1	0	1	0	0	mmu-miR-384-5p	-0.3	-0.3	0.84	2007, 2011
NUDT5	ENST00000491614.1	nudix (nucleoside diphosphate linked moiety X)-type motif 5	808	1	1	0	0	0	0	0	0	0	mmu-miR-30a-5p	-0.3	-0.35	0.95
ELOVL5	ENST00000370918.4	ELOVL fatty acid elongase 5	2233	1	1	0	0	0	0	0	0	1	mmu-miR-30b-5p	-0.3	-0.3	0.72	2005, 2007, 2009, 2011
NEDD4	ENST00000338963.2	neural precursor cell expressed, developmentally down-regulated 4, E3 ubiquitin protein ligase	289	2	1	1	0	0	0	0	0	0	mmu-miR-30b-5p	-0.3	-0.31	0.99	2005, 2007, 2009, 2011
RTN4R	ENST00000043402.7	reticulon 4 receptor	55	1	1	0	0	0	0	0	0	0	mmu-miR-30a-5p	-0.29	-0.29	0.29	2009, 2011
GLDC	ENST00000321612.6	glycine dehydrogenase (decarboxylating)	5	1	1	0	0	0	0	0	0	0	mmu-miR-30a-5p	-0.29	-0.29	0.55	2011
FECH	ENST00000262093.5	ferrochelatase	716	1	1	0	0	0	0	0	0	0	mmu-miR-30b-5p	-0.29	-0.31	0.49	2009, 2011
AMOTL2	ENST00000249883.5	angiomotin like 2	78	1	1	0	0	0	0	0	0	0	mmu-miR-30b-5p	-0.29	-0.3	0.95	2005, 2007, 2009, 2011
NR5A2	ENST00000367362.3	nuclear receptor subfamily 5, group A, member 2	121	2	1	1	0	0	0	0	0	0	mmu-miR-384-5p	-0.29	-0.36	0.95	2005, 2007, 2009, 2011
LARGE	ENST00000354992.2	like-glycosyltransferase	411	1	1	0	0	0	0	0	0	0	mmu-miR-30b-5p	-0.29	-0.29	0.95	2005, 2007, 2009, 2011
FAM46A	ENST00000369754.3	family with sequence similarity 46, member A	899	1	1	0	0	1	0	1	0	1	mmu-miR-30b-5p	-0.29	-0.32	0.9	2007, 2009, 2011
GPR125	ENST00000334304.5	G protein-coupled receptor 125	1042	1	1	0	0	1	1	0	0	0	mmu-miR-30e-5p	-0.29	-0.32	0.95	2009, 2011
DLL4	ENST00000249749.5	delta-like 4 (Drosophila)	605	1	1	0	0	0	0	0	0	0	mmu-miR-30a-5p	-0.29	-0.29	0.95	2005, 2007, 2009, 2011
PDSS1	ENST00000376203.5	prenyl (decaprenyl) diphosphate synthase, subunit 1	41	1	1	0	0	0	0	0	0	0	mmu-miR-30b-5p	-0.29	-0.46	0.85	2011
DDIT4	ENST00000307365.3	DNA-damage-inducible transcript 4	2454	1	1	0	0	0	0	0	0	0	mmu-miR-384-5p	-0.29	-0.35	0.47	2005, 2007, 2009, 2011
YPEL5	ENST00000379520.3	yippee-like 5 (Drosophila)	307	1	1	0	0	0	0	0	0	0	mmu-miR-30a-5p	-0.29	-0.29	0.21	2005, 2007, 2011
HOXA1	ENST00000355633.5	homeobox A1	157	1	1	0	0	0	0	0	0	1	mmu-miR-30e-5p	-0.29	-0.29	0.81	2005, 2007, 2009
GPER1	ENST00000397092.1	G protein-coupled estrogen receptor 1	284	1	1	0	0	0	0	0	0	0	mmu-miR-30e-5p	-0.29	-0.29	< 0.1	2009, 2011
CUL2	ENST00000374746.1	cullin 2	27	1	1	0	0	0	0	0	0	0	mmu-miR-30a-5p	-0.29	-0.29	0.95	2005, 2007, 2009, 2011
BCOR	ENST00000397354.3	BCL6 corepressor	355	1	1	0	0	0	0	0	0	0	mmu-miR-30b-5p	-0.29	-0.29	0.9	2005, 2007, 2009, 2011
SLC38A7	ENST00000570101.1	solute carrier family 38, member 7	635	1	1	0	0	0	0	0	0	0	mmu-miR-30a-5p	-0.29	-0.29	0.95	2005, 2007, 2009, 2011
RUNX1	ENST00000344691.4	runt-related transcription factor 1	182	2	1	1	0	0	0	0	0	1	mmu-miR-384-5p	-0.29	-0.52	0.98	2011
CBFB	ENST00000290858.6	core-binding factor, beta subunit	3904	1	1	0	0	1	0	0	1	0	mmu-miR-384-5p	-0.29	-0.32	0.59	2005, 2007, 2009, 2011
PGM1	ENST00000371084.3	phosphoglucomutase 1	612	1	1	0	0	0	0	0	0	0	mmu-miR-30b-5p	-0.28	-0.28	0.75	2005, 2007, 2009, 2011
LIN7C	ENST00000278193.2	lin-7 homolog C (C. elegans)	1701	1	1	0	0	0	0	0	0	0	mmu-miR-30e-5p	-0.28	-0.32	0.76	2005, 2007, 2009, 2011
NHLH2	ENST00000320238.3	nescient helix loop helix 2	16	1	1	0	0	0	0	0	0	0	mmu-miR-30e-5p	-0.28	-0.28	0.87	2005, 2007, 2009, 2011
NSG1	ENST00000421177.2	Neuron-specific protein family member 1	25	1	1	0	0	0	0	0	0	0	mmu-miR-30b-5p	-0.28	-0.48	0.61	2007, 2009, 2011
AP2A1	ENST00000354293.5	adaptor-related protein complex 2, alpha 1 subunit	285	1	1	0	0	0	0	0	0	0	mmu-miR-30a-5p	-0.28	-0.28	0.84	2005, 2007, 2009, 2011
DGKZ	ENST00000343674.6	diacylglycerol kinase, zeta	65	1	1	0	0	0	0	0	0	0	mmu-miR-30b-5p	-0.28	-0.28	0.9	2005, 2007, 2009, 2011
EVA1C	ENST00000401402.3	eva-1 homolog C (C. elegans)	177	1	1	0	0	0	0	0	0	0	mmu-miR-30a-5p	-0.28	-0.29	< 0.1
LPPR4	ENST00000370185.3	Lipid phosphate phosphatase-related protein type 4	5	1	1	0	0	0	0	0	0	0	mmu-miR-30e-5p	-0.28	-0.28	0.87	2005, 2007, 2009, 2011
NUS1	ENST00000368494.3	nuclear undecaprenyl pyrophosphate synthase 1 homolog (S. cerevisiae)	302	1	1	0	0	0	0	0	0	0	mmu-miR-30b-5p	-0.28	-0.28	0.95	2007, 2009, 2011
ERLIN1	ENST00000421367.2	ER lipid raft associated 1	86	1	1	0	0	0	0	0	0	0	mmu-miR-384-5p	-0.28	-0.3	0.9	2007, 2009, 2011
DSC2	ENST00000251081.6	desmocollin 2	145	1	1	0	0	0	0	0	0	0	mmu-miR-30b-5p	-0.28	-0.29	0.66	2011
LRRK2	ENST00000298910.7	leucine-rich repeat kinase 2	37	1	1	0	0	0	0	0	0	0	mmu-miR-384-5p	-0.28	-0.28	0.17	2009, 2011
YOD1	ENST00000315927.4	YOD1 deubiquitinase	55	3	1	0	2	1	0	1	0	0	mmu-miR-30c-5p	-0.28	-0.78	0.96	2007, 2009, 2011
TBC1D15	ENST00000550746.1	TBC1 domain family, member 15	1164	1	1	0	0	0	0	0	0	0	mmu-miR-30a-5p	-0.28	-0.42	0.95	2005, 2007, 2009, 2011
LEPR	ENST00000371060.3	leptin receptor	169	1	1	0	0	1	1	0	0	0	mmu-miR-384-5p	-0.27	-0.27	0.34	2011
PPTC7	ENST00000354300.3	PTC7 protein phosphatase homolog (S. cerevisiae)	817	1	1	0	0	1	0	1	0	0	mmu-miR-30b-5p	-0.27	-0.27	0.95	2007, 2009, 2011
KHNYN	ENST00000251343.5	KH and NYN domain containing	421	1	1	0	0	1	1	0	0	1	mmu-miR-30b-5p	-0.27	-0.31	0.81	2007, 2009, 2011
SEMA3A	ENST00000265362.4	sema domain, immunoglobulin domain (Ig), short basic domain, secreted, (semaphorin) 3A	162	1	1	0	0	2	0	2	0	0	mmu-miR-30b-5p	-0.27	-0.3	0.95	2005, 2007, 2009, 2011
MTTP	ENST00000457717.1	microsomal triglyceride transfer protein	32	1	1	0	0	0	0	0	0	0	mmu-miR-30c-5p	-0.27	-0.27	0.95	2007, 2009, 2011
MAN1A2	ENST00000356554.3	mannosidase, alpha, class 1A, member 2	603	1	1	0	0	0	0	0	0	0	mmu-miR-30b-5p	-0.27	-0.27	0.95	2005, 2007, 2009, 2011
PIP4K2B	ENST00000269554.3	phosphatidylinositol-5-phosphate 4-kinase, type II, beta	148	1	1	0	0	0	0	0	0	0	mmu-miR-30b-5p	-0.27	-0.32	0.95	2011
CSNK1A1	ENST00000261798.5	casein kinase 1, alpha 1	769	1	1	0	0	0	0	0	0	0	mmu-miR-30b-5p	-0.27	-0.33	0.95	2007, 2009, 2011
FAM109A	ENST00000361483.3	family with sequence similarity 109, member A	780	1	1	0	0	0	0	0	0	1	mmu-miR-384-5p	-0.27	-0.27	0.93	2007, 2009, 2011
LRRC8D	ENST00000337338.5	leucine rich repeat containing 8 family, member D	96	1	1	0	0	0	0	0	0	0	mmu-miR-30a-5p	-0.26	-0.27	0.95	2007, 2009, 2011
GMEB2	ENST00000370069.1	glucocorticoid modulatory element binding protein 2	240	1	1	0	0	1	0	1	0	0	mmu-miR-384-5p	-0.26	-0.27	0.93	2005, 2007, 2009, 2011
ZBTB18	ENST00000358704.4	zinc finger and BTB domain containing 18	935	1	1	0	0	0	0	0	0	0	mmu-miR-30e-5p	-0.26	-0.27	0.82	2007, 2009, 2011
LPGAT1	ENST00000366997.4	lysophosphatidylglycerol acyltransferase 1	135	2	1	1	0	1	0	0	1	0	mmu-miR-30b-5p	-0.26	-0.32	0.95	2005, 2007, 2009, 2011
SOX4	ENST00000244745.1	SRY (sex determining region Y)-box 4	2736	1	1	0	0	0	0	0	0	0	mmu-miR-30a-5p	-0.26	-0.26	0.95	2005, 2007, 2009, 2011
EML1	ENST00000262233.6	echinoderm microtubule associated protein like 1	371	1	1	0	0	1	0	0	1	0	mmu-miR-30a-5p	-0.26	-0.37	0.98	2009, 2011
CEP41	ENST00000223208.5	centrosomal protein 41kDa	346	1	1	0	0	0	0	0	0	0	mmu-miR-384-5p	-0.26	-0.27	0.9	2005, 2007, 2009, 2011
RAB4B	ENST00000357052.2	RAB4B, member RAS oncogene family	52	1	1	0	0	0	0	0	0	0	mmu-miR-30e-5p	-0.26	-0.57	0.66	2005, 2007, 2009, 2011
MCF2L	ENST00000397030.1	MCF.2 cell line derived transforming sequence-like	79	1	1	0	0	1	0	0	1	0	mmu-miR-30b-5p	-0.26	-0.26	0.98	2009, 2011
PLEKHM3	ENST00000427836.2	pleckstrin homology domain containing, family M, member 3	11	1	1	0	0	0	0	0	0	2	mmu-miR-30b-5p	-0.26	-0.51	0.59	2011
BCL2L11	ENST00000393256.3	BCL2-like 11 (apoptosis facilitator)	105	1	1	0	0	0	0	0	0	0	mmu-miR-30a-5p	-0.26	-0.27	0.84	2005, 2007, 2009, 2011
MMP16	ENST00000286614.6	matrix metallopeptidase 16 (membrane-inserted)	12	1	1	0	0	3	1	1	1	1	mmu-miR-30e-5p	-0.26	-0.41	0.95
GNAO1	ENST00000262493.6	guanine nucleotide binding protein (G protein), alpha activating activity polypeptide O	8	1	1	0	0	0	0	0	0	0	mmu-miR-30b-5p	-0.26	-0.26	0.66	2005, 2007, 2011
NKX2-2	ENST00000377142.4	NK2 homeobox 2	10	1	1	0	0	0	0	0	0	0	mmu-miR-384-5p	-0.26	-0.26	0.89	2005, 2007, 2009, 2011
ZBTB41	ENST00000367405.4	zinc finger and BTB domain containing 41	33	1	1	0	0	1	0	0	1	0	mmu-miR-30e-5p	-0.26	-0.28	0.89	2007, 2009, 2011
MIER2	ENST00000264819.4	mesoderm induction early response 1, family member 2	137	1	1	0	0	0	0	0	0	0	mmu-miR-30b-5p	-0.26	-0.26	0.93	2007, 2009, 2011
FOXB1	ENST00000396057.4	forkhead box B1	31	1	1	0	0	0	0	0	0	0	mmu-miR-30e-5p	-0.26	-0.31	0.94
SLC38A4	ENST00000447411.1	solute carrier family 38, member 4	10	1	1	0	0	1	0	0	1	0	mmu-miR-30e-5p	-0.26	-0.26	0.81	2009, 2011
DEXI	ENST00000331808.4	Dexi homolog (mouse)	1646	1	1	0	0	0	0	0	0	0	mmu-miR-30b-5p	-0.26	-0.26	0.37	2005, 2007, 2009, 2011
CCNK	ENST00000389879.5	cyclin K	1777	1	1	0	0	0	0	0	0	0	mmu-miR-30b-5p	-0.26	-0.43	0.95	2005, 2007, 2009, 2011
SEC23A	ENST00000537403.1	Sec23 homolog A (S. cerevisiae)	413	1	1	0	0	0	0	0	0	1	mmu-miR-30b-5p	-0.25	-0.33	0.62	2005, 2007, 2009, 2011
ADAM19	ENST00000257527.4	ADAM metallopeptidase domain 19	981	1	1	0	0	0	0	0	0	0	mmu-miR-384-5p	-0.25	-0.25	0.95	2005, 2007, 2009, 2011
KCTD5	ENST00000301738.4	potassium channel tetramerization domain containing 5	2296	1	1	0	0	0	0	0	0	0	mmu-miR-30e-5p	-0.25	-0.26	0.93	2005, 2007, 2009, 2011
ST8SIA4	ENST00000231461.5	ST8 alpha-N-acetyl-neuraminide alpha-2,8-sialyltransferase 4	5	1	1	0	0	1	0	1	0	0	mmu-miR-30b-5p	-0.25	-0.25	0.95	2005, 2007, 2009, 2011
ACVR1	ENST00000263640.3	activin A receptor, type I	1523	1	1	0	0	0	0	0	0	0	mmu-miR-30b-5p	-0.25	-0.25	0.86	2005, 2007, 2009, 2011
PIGA	ENST00000542278.1	phosphatidylinositol glycan anchor biosynthesis, class A	104	1	1	0	0	0	0	0	0	0	mmu-miR-30e-5p	-0.25	-0.26	0.56	2011
MAP3K12	ENST00000267079.2	mitogen-activated protein kinase kinase kinase 12	61	1	1	0	0	0	0	0	0	1	mmu-miR-30b-5p	-0.25	-0.31	0.86	2005, 2007, 2009, 2011
CDCA7	ENST00000306721.3	cell division cycle associated 7	182	1	1	0	0	0	0	0	0	0	mmu-miR-384-5p	-0.25	-0.25	0.17	2009, 2011
GAN	ENST00000568107.2	gigaxonin	185	4	1	2	1	2	1	0	1	1	mmu-miR-30d-5p	-0.25	-0.43	> 0.99	2011
MZT1	ENST00000377818.3	mitotic spindle organizing protein 1	157	1	1	0	0	0	0	0	0	0	mmu-miR-30e-5p	-0.25	-0.25	< 0.1	2009, 2011
ADRA1D	ENST00000379453.4	adrenoceptor alpha 1D	17	1	1	0	0	0	0	0	0	0	mmu-miR-30a-5p	-0.25	-0.25	0.95	2007, 2009, 2011
STXBP5	ENST00000367481.3	syntaxin binding protein 5 (tomosyn)	555	1	1	0	0	1	0	0	1	2	mmu-miR-30e-5p	-0.25	-0.37	0.77	2011
XPR1	ENST00000367590.4	xenotropic and polytropic retrovirus receptor 1	544	1	1	0	0	2	0	0	2	0	mmu-miR-30d-5p	-0.25	-0.26	0.95	2005, 2007, 2009, 2011
STK39	ENST00000355999.4	serine threonine kinase 39	266	1	1	0	0	0	0	0	0	0	mmu-miR-30a-5p	-0.25	-0.33	0.87	2005, 2007, 2009, 2011
MARCH4	ENST00000273067.4	membrane-associated ring finger (C3HC4) 4, E3 ubiquitin protein ligase	68	1	1	0	0	1	0	1	0	0	mmu-miR-30e-5p	-0.25	-0.25	0.84	2007, 2009, 2011
CHST1	ENST00000308064.2	carbohydrate (keratan sulfate Gal-6) sulfotransferase 1	5	1	1	0	0	0	0	0	0	0	mmu-miR-30d-5p	-0.24	-0.24	0.95	2005, 2007, 2009, 2011
GALNT3	ENST00000392701.3	UDP-N-acetyl-alpha-D-galactosamine:polypeptide N-acetylgalactosaminyltransferase 3 (GalNAc-T3)	40	1	1	0	0	0	0	0	0	0	mmu-miR-30a-5p	-0.24	-0.24	0.95	2005, 2007, 2009, 2011
DCBLD1	ENST00000338728.5	discoidin, CUB and LCCL domain containing 1	876	1	1	0	0	1	0	0	1	0	mmu-miR-30e-5p	-0.24	-0.38	0.21
ACTR1A	ENST00000487599.1	ARP1 actin-related protein 1 homolog A, centractin alpha (yeast)	190	1	1	0	0	0	0	0	0	0	mmu-miR-30e-5p	-0.24	-0.32	0.95	2005, 2007, 2009, 2011
LCLAT1	ENST00000309052.4	lysocardiolipin acyltransferase 1	397	1	1	0	0	0	0	0	0	0	mmu-miR-30b-5p	-0.24	-0.25	0.92	2005, 2007, 2009, 2011
CYB561	ENST00000584031.1	cytochrome b561	10	1	1	0	0	0	0	0	0	0	mmu-miR-30e-5p	-0.24	-0.24	0.69	2009, 2011
ATP6V1C1	ENST00000395862.3	ATPase, H+ transporting, lysosomal 42kDa, V1 subunit C1	951	1	1	0	0	1	0	1	0	0	mmu-miR-30b-5p	-0.24	-0.28	0.95	2009, 2011
PPFIA2	ENST00000549396.1	protein tyrosine phosphatase, receptor type, f polypeptide (PTPRF), interacting protein (liprin), alpha 2	5	1	1	0	0	0	0	0	0	2	mmu-miR-30e-5p	-0.24	-0.24	0.76	2011
LRRC17	ENST00000249377.4	leucine rich repeat containing 17	144	1	1	0	0	0	0	0	0	0	mmu-miR-30a-5p	-0.24	-0.24	0.71	2005, 2007, 2009, 2011
RORA	ENST00000335670.6	RAR-related orphan receptor A	102	2	1	1	0	1	1	0	0	0	mmu-miR-30b-5p	-0.24	-0.29	0.77	2011
BNC1	ENST00000345382.2	basonuclin 1	6	1	1	0	0	0	0	0	0	0	mmu-miR-30a-5p	-0.24	-0.24	0.85	2005, 2007, 2009, 2011
ASCC3	ENST00000369162.2	activating signal cointegrator 1 complex subunit 3	159	1	1	0	0	0	0	0	0	0	mmu-miR-30b-5p	-0.24	-0.24	0.67	2011
ATF7IP2	ENST00000396559.1	activating transcription factor 7 interacting protein 2	50	1	1	0	0	0	0	0	0	0	mmu-miR-30b-5p	-0.24	-0.24	0.17	2009, 2011
SNX18	ENST00000343017.6	sorting nexin 18	174	1	1	0	0	1	0	0	1	1	mmu-miR-30b-5p	-0.24	-0.24	0.97	2009, 2011
GFPT2	ENST00000253778.8	glutamine-fructose-6-phosphate transaminase 2	70	1	1	0	0	0	0	0	0	0	mmu-miR-30b-5p	-0.24	-0.24	0.94	2005, 2007, 2009, 2011
BDP1	ENST00000380675.2	B double prime 1, subunit of RNA polymerase III transcription initiation factor IIIB	12	2	1	1	0	0	0	0	0	0	mmu-miR-30b-5p	-0.24	-0.28	0.97	2007, 2009, 2011
EDEM3	ENST00000318130.8	ER degradation enhancer, mannosidase alpha-like 3	535	2	1	1	0	0	0	0	0	0	mmu-miR-384-5p	-0.24	-0.24	0.91	2007, 2009, 2011
SH3RF1	ENST00000284637.9	SH3 domain containing ring finger 1	2747	1	1	0	0	0	0	0	0	0	mmu-miR-30e-5p	-0.24	-0.24	0.86	2007, 2009, 2011
SCN1A	ENST00000423058.2	sodium channel, voltage-gated, type I, alpha subunit	21	1	1	0	0	1	1	0	0	1	mmu-miR-30b-5p	-0.24	-0.27	0.95	2011
CCNJL	ENST00000393977.3	cyclin J-like	66	1	1	0	0	0	0	0	0	0	mmu-miR-30e-5p	-0.23	-0.36	0.95	2007, 2009, 2011
HOXA11	ENST00000006015.3	homeobox A11	133	1	1	0	0	0	0	0	0	0	mmu-miR-384-5p	-0.23	-0.23	0.92	2005, 2007, 2009, 2011
KCNJ12	ENST00000583088.1	potassium inwardly-rectifying channel, subfamily J, member 12	9	1	1	0	0	0	0	0	0	0	mmu-miR-30e-5p	-0.23	-0.23	0.89	2005, 2007, 2009, 2011
ZFC3H1	ENST00000378743.3	zinc finger, C3H1-type containing	129	1	1	0	0	0	0	0	0	0	mmu-miR-30a-5p	-0.23	-0.23	0.81	2007, 2009, 2011
EPB41	ENST00000373798.1	erythrocyte membrane protein band 4.1 (elliptocytosis 1, RH-linked)	53	1	1	0	0	0	0	0	0	0	mmu-miR-30e-5p	-0.23	-0.23	0.85	2005, 2007, 2009, 2011
CBLB	ENST00000264122.4	Cbl proto-oncogene B, E3 ubiquitin protein ligase	469	1	1	0	0	2	0	1	1	1	mmu-miR-384-5p	-0.23	-0.26	0.87	2005, 2007, 2009, 2011
ZBED4	ENST00000216268.5	zinc finger, BED-type containing 4	2276	1	1	0	0	1	0	0	1	0	mmu-miR-384-5p	-0.23	-0.23	0.81	2009, 2011
NECAP1	ENST00000339754.5	NECAP endocytosis associated 1	13	1	1	0	0	0	0	0	0	0	mmu-miR-30b-5p	-0.23	-0.23	0.6	2005, 2007, 2009, 2011
SLC9A8	ENST00000361573.2	solute carrier family 9, subfamily A (NHE8, cation proton antiporter 8), member 8	474	1	1	0	0	0	0	0	0	0	mmu-miR-30b-5p	-0.23	-0.23	0.93	2005, 2007, 2009, 2011
CDH20	ENST00000262717.4	cadherin 20, type 2	5	1	1	0	0	0	0	0	0	0	mmu-miR-30e-5p	-0.23	-0.23	0.88
GJC2	ENST00000366714.2	gap junction protein, gamma 2, 47kDa	10	1	1	0	0	0	0	0	0	0	mmu-miR-384-5p	-0.23	-0.52	0.44	2009, 2011
CPNE8	ENST00000331366.5	copine VIII	343	1	1	0	0	0	0	0	0	1	mmu-miR-30a-5p	-0.23	-0.28	0.84	2005, 2007, 2009, 2011
STK35	ENST00000381482.3	serine/threonine kinase 35	263	2	1	1	0	1	0	1	0	0	mmu-miR-30b-5p	-0.23	-0.24	0.99	2005, 2007, 2009, 2011
ARID4A	ENST00000431317.2	AT rich interactive domain 4A (RBP1-like)	33	1	1	0	0	0	0	0	0	0	mmu-miR-30b-5p	-0.23	-0.23	0.88	2005, 2007, 2009, 2011
P4HA2	ENST00000401867.1	prolyl 4-hydroxylase, alpha polypeptide II	1077	1	1	0	0	0	0	0	0	0	mmu-miR-30a-5p	-0.22	-0.3	0.95	2005, 2007, 2009, 2011
RAD23B	ENST00000358015.3	RAD23 homolog B (S. cerevisiae)	1012	1	1	0	0	0	0	0	0	0	mmu-miR-30e-5p	-0.22	-0.28	0.89	2005, 2007, 2009, 2011
KCNJ6	ENST00000609713.1	potassium inwardly-rectifying channel, subfamily J, member 6	5	1	1	0	0	3	2	1	0	0	mmu-miR-384-5p	-0.22	-0.22	0.95
SP4	ENST00000222584.3	Sp4 transcription factor	131	2	1	0	1	0	0	0	0	0	mmu-miR-30b-5p	-0.22	-0.22	0.95	2007, 2009, 2011
CADPS	ENST00000383710.4	Ca++-dependent secretion activator	5	1	1	0	0	1	0	1	0	0	mmu-miR-30b-5p	-0.22	-0.22	0.15	2005, 2007, 2011
FBXO42	ENST00000375592.3	F-box protein 42	854	1	1	0	0	0	0	0	0	0	mmu-miR-384-5p	-0.22	-0.31	0.94	2009, 2011
NR6A1	ENST00000487099.2	nuclear receptor subfamily 6, group A, member 1	1082	2	1	0	1	1	1	0	0	0	mmu-miR-30a-5p	-0.22	-0.23	0.98	2005, 2007
MAGI3	ENST00000307546.9	membrane associated guanylate kinase, WW and PDZ domain containing 3	70	1	1	0	0	0	0	0	0	0	mmu-miR-30b-5p	-0.22	-0.22	0.91	2009, 2011
SLC6A9	ENST00000372310.3	solute carrier family 6 (neurotransmitter transporter, glycine), member 9	74	1	1	0	0	0	0	0	0	0	mmu-miR-30a-5p	-0.22	-0.22	0.88	2007, 2009, 2011
HEPHL1	ENST00000315765.9	hephaestin-like 1	5	1	1	0	0	0	0	0	0	0	mmu-miR-384-5p	-0.22	-0.22	0.83	2009, 2011
PHTF2	ENST00000416283.2	putative homeodomain transcription factor 2	1730	1	1	0	0	0	0	0	0	1	mmu-miR-30b-5p	-0.22	-0.22	0.77	2005, 2007, 2009, 2011
FAM160B1	ENST00000369248.4	family with sequence similarity 160, member B1	91	1	1	0	0	1	0	0	1	1	mmu-miR-30b-5p	-0.22	-0.35	0.99	2005, 2007, 2009, 2011
PIK3R2	ENST00000222254.8	phosphoinositide-3-kinase, regulatory subunit 2 (beta)	1484	1	1	0	0	0	0	0	0	0	mmu-miR-384-5p	-0.22	-0.22	0.94	2005, 2007, 2009, 2011
WIPF1	ENST00000392547.2	WAS/WASL interacting protein family, member 1	304	1	1	0	0	2	0	0	2	0	mmu-miR-30c-5p	-0.22	-0.5	0.86	2011
ADRA2A	ENST00000280155.2	adrenoceptor alpha 2A	239	2	1	0	1	0	0	0	0	0	mmu-miR-384-5p	-0.22	-0.37	0.98	2009, 2011
RFX7	ENST00000423270.1	regulatory factor X, 7	1049	2	1	1	0	0	0	0	0	0	mmu-miR-384-5p	-0.22	-0.22	0.88	2007, 2009, 2011
SGCB	ENST00000381431.5	sarcoglycan, beta (43kDa dystrophin-associated glycoprotein)	1795	1	1	0	0	2	0	1	1	0	mmu-miR-30e-5p	-0.22	-0.49	0.71	2011
RAB23	ENST00000317483.3	RAB23, member RAS oncogene family	32	1	1	0	0	0	0	0	0	1	mmu-miR-30a-5p	-0.22	-0.35	0.9	2009, 2011
PTGFRN	ENST00000393203.2	prostaglandin F2 receptor inhibitor	591	3	1	2	0	0	0	0	0	0	mmu-miR-30a-5p	-0.22	-0.35	0.98	2005, 2007, 2009, 2011
PAPOLB	ENST00000404991.1	poly(A) polymerase beta (testis specific)	5	1	1	0	0	0	0	0	0	0	mmu-miR-30e-5p	-0.21	-0.21	0.28	2005, 2007, 2009, 2011
ROR1	ENST00000371079.1	receptor tyrosine kinase-like orphan receptor 1	80	2	1	1	0	1	1	0	0	0	mmu-miR-30e-5p	-0.21	-0.35	0.62
BAZ2B	ENST00000392782.1	bromodomain adjacent to zinc finger domain, 2B	25	1	1	0	0	1	0	0	1	0	mmu-miR-30a-5p	-0.21	-0.22	0.95	2011
TRO	ENST00000173898.7	trophinin	130	1	1	0	0	0	0	0	0	0	mmu-miR-30b-5p	-0.21	-0.21	ORF
MYBL2	ENST00000217026.4	v-myb avian myeloblastosis viral oncogene homolog-like 2	71	1	1	0	0	0	0	0	0	0	mmu-miR-30a-5p	-0.21	-0.21	0.91	2005, 2007, 2009, 2011
DRD1	ENST00000393752.2	dopamine receptor D1	7	1	1	0	0	0	0	0	0	0	mmu-miR-30b-5p	-0.21	-0.21	< 0.1
DNMT3A	ENST00000380746.4	DNA (cytosine-5-)-methyltransferase 3 alpha	221	1	1	0	0	1	1	0	0	0	mmu-miR-30b-5p	-0.21	-0.24	0.95	2005, 2007, 2009, 2011
SNX33	ENST00000308527.5	sorting nexin 33	148	1	1	0	0	1	0	1	0	1	mmu-miR-30e-5p	-0.21	-0.23	0.93	2007, 2009, 2011
REEP1	ENST00000165698.5	receptor accessory protein 1	49	2	1	1	0	0	0	0	0	0	mmu-miR-30b-5p	-0.21	-0.29	0.96	2009, 2011
SCN3A	ENST00000360093.3	sodium channel, voltage-gated, type III, alpha subunit	5	1	1	0	0	0	0	0	0	0	mmu-miR-30e-5p	-0.21	-0.21	0.9	2005, 2007, 2009, 2011
CAMK2D	ENST00000296402.5	calcium/calmodulin-dependent protein kinase II delta	938	1	1	0	0	0	0	0	0	2	mmu-miR-30e-5p	-0.21	-0.21	0.94	2005, 2007, 2009, 2011
PRICKLE1	ENST00000455697.1	prickle homolog 1 (Drosophila)	146	1	1	0	0	0	0	0	0	0	mmu-miR-30b-5p	-0.21	-0.21	0.94	2005, 2007, 2009, 2011
PARP16	ENST00000261888.6	poly (ADP-ribose) polymerase family, member 16	97	1	1	0	0	0	0	0	0	0	mmu-miR-30a-5p	-0.21	-0.21	0.86	2009, 2011
RAB22A	ENST00000244040.3	RAB22A, member RAS oncogene family	484	1	1	0	0	2	0	2	0	1	mmu-miR-384-5p	-0.21	-0.35	0.9	2005, 2007, 2009, 2011
LARP1B	ENST00000441387.1	La ribonucleoprotein domain family, member 1B	32	1	1	0	0	1	1	0	0	0	mmu-miR-30a-5p	-0.2	-0.21	0.89	2011
BNC2	ENST00000380672.4	basonuclin 2	770	2	1	1	0	1	0	0	1	0	mmu-miR-30b-5p	-0.2	-0.31	> 0.99	2005, 2007, 2009, 2011
CRKL	ENST00000354336.3	v-crk avian sarcoma virus CT10 oncogene homolog-like	2142	1	1	0	0	1	0	1	0	0	mmu-miR-384-5p	-0.2	-0.2	0.95	2005, 2007, 2009, 2011
KIAA1549	ENST00000440172.1	KIAA1549	508	1	1	0	0	0	0	0	0	0	mmu-miR-30b-5p	-0.2	-0.23	0.95	2009, 2011
ZBTB44	ENST00000525842.1	zinc finger and BTB domain containing 44	236	1	1	0	0	0	0	0	0	0	mmu-miR-384-5p	-0.2	-0.2	< 0.1	2009, 2011
CHL1	ENST00000256509.2	cell adhesion molecule L1-like	24	1	1	0	0	0	0	0	0	0	mmu-miR-384-5p	-0.2	-0.2	0.95	2009, 2011
CLOCK	ENST00000309964.4	clock circadian regulator	86	1	1	0	0	3	0	3	0	0	mmu-miR-30e-5p	-0.2	-0.28	0.91	2005, 2007, 2009, 2011
CCDC117	ENST00000249064.4	coiled-coil domain containing 117	211	1	1	0	0	0	0	0	0	0	mmu-miR-30e-5p	-0.2	-0.22	0.47	2007, 2009, 2011
ARL10	ENST00000310389.5	ADP-ribosylation factor-like 10	236	1	1	0	0	0	0	0	0	0	mmu-miR-384-5p	-0.2	-0.24	0.94	2007, 2009, 2011
KIAA1147	ENST00000536163.1	KIAA1147	73	1	1	0	0	1	0	0	1	1	mmu-miR-30a-5p	-0.2	-0.2	0.65	2007, 2009, 2011
BRD1	ENST00000457780.2	bromodomain containing 1	124	1	1	0	0	0	0	0	0	0	mmu-miR-30b-5p	-0.2	-0.2	0.31	2005, 2007, 2009, 2011
CCDC120	ENST00000376396.3	coiled-coil domain containing 120	170	1	1	0	0	0	0	0	0	0	mmu-miR-384-5p	-0.2	-0.2	0.88	2007, 2009, 2011
PPP1R12A	ENST00000261207.5	protein phosphatase 1, regulatory subunit 12A	276	1	1	0	0	0	0	0	0	0	mmu-miR-30b-5p	-0.19	-0.19	0.9	2005, 2007, 2009, 2011
SDAD1	ENST00000356260.5	SDA1 domain containing 1	91	1	1	0	0	0	0	0	0	0	mmu-miR-30a-5p	-0.19	-0.34	0.16	2009, 2011
MLK4	ENST00000366624.3	Mitogen-activated protein kinase kinase kinase MLK4	405	1	1	0	0	0	0	0	0	0	mmu-miR-30b-5p	-0.19	-0.29	0.93	2009, 2011
ATP2B1	ENST00000261173.2	ATPase, Ca++ transporting, plasma membrane 1	699	1	1	0	0	0	0	0	0	1	mmu-miR-384-5p	-0.19	-0.22	0.87	2005, 2007, 2009, 2011
ELL2	ENST00000237853.4	elongation factor, RNA polymerase II, 2	397	1	1	0	0	0	0	0	0	0	mmu-miR-30e-5p	-0.19	-0.21	0.83	2005, 2007, 2009, 2011
EPC1	ENST00000319778.6	enhancer of polycomb homolog 1 (Drosophila)	102	1	1	0	0	0	0	0	0	0	mmu-miR-30b-5p	-0.19	-0.19	0.89
ATF1	ENST00000262053.3	activating transcription factor 1	1599	1	1	0	0	0	0	0	0	0	mmu-miR-30a-5p	-0.19	-0.23	0.24	2007, 2009, 2011
GPR157	ENST00000377411.4	G protein-coupled receptor 157	48	1	1	0	0	0	0	0	0	0	mmu-miR-30e-5p	-0.19	-0.19	0.94
AL139099.1	ENST00000539688.1	Full-length cDNA clone CS0DK012YO09 of HeLa cells of Homo sapiens (human); Uncharacterized protein	9	1	1	0	0	0	0	0	0	0	mmu-miR-30e-5p	-0.19	-0.36	0.13
MAPK8	ENST00000374182.3	mitogen-activated protein kinase 8	227	1	1	0	0	1	0	0	1	1	mmu-miR-30b-5p	-0.19	-0.66	0.68
RHOB	ENST00000272233.4	ras homolog family member B	6532	1	1	0	0	0	0	0	0	0	mmu-miR-30b-5p	-0.19	-0.39	0.82	2005, 2007, 2009, 2011
NEUROD1	ENST00000295108.3	neuronal differentiation 1	5	1	1	0	0	0	0	0	0	0	mmu-miR-30b-5p	-0.19	-0.19	0.81	2005, 2007, 2009, 2011
VPS26B	ENST00000281187.5	vacuolar protein sorting 26 homolog B (S. pombe)	1236	1	1	0	0	0	0	0	0	0	mmu-miR-30b-5p	-0.19	-0.2	0.95	2009, 2011
SLC38A2	ENST00000256689.5	solute carrier family 38, member 2	696	1	1	0	0	0	0	0	0	1	mmu-miR-30e-5p	-0.18	-0.2	0.23	2005, 2007, 2009, 2011
RNF157	ENST00000269391.6	ring finger protein 157	163	1	1	0	0	1	0	0	1	0	mmu-miR-30b-5p	-0.18	-0.2	0.95	2011
LOX	ENST00000231004.4	lysyl oxidase	3441	1	1	0	0	0	0	0	0	0	mmu-miR-384-5p	-0.18	-0.4	0.92	2011
ITSN1	ENST00000379960.5	intersectin 1 (SH3 domain protein)	194	1	1	0	0	0	0	0	0	1	mmu-miR-30a-5p	-0.18	-0.19	0.9	2005, 2007, 2009, 2011
ADO	ENST00000373783.1	2-aminoethanethiol (cysteamine) dioxygenase	686	1	1	0	0	2	0	2	0	1	mmu-miR-30a-5p	-0.18	-0.24	0.65	2003, 2005, 2007, 2009, 2011
CPEB4	ENST00000265085.5	cytoplasmic polyadenylation element binding protein 4	472	1	1	0	0	1	0	0	1	0	mmu-miR-30b-5p	-0.18	-0.18	0.96	2005, 2007, 2009, 2011
SIAH2	ENST00000312960.3	siah E3 ubiquitin protein ligase 2	228	1	1	0	0	0	0	0	0	0	mmu-miR-30b-5p	-0.18	-0.35	0.75	2005, 2007, 2009, 2011
CANT1	ENST00000392446.5	calcium activated nucleotidase 1	538	1	1	0	0	0	0	0	0	0	mmu-miR-30b-5p	-0.18	-0.2	0.16	2011
VAT1	ENST00000355653.3	vesicle amine transport 1	2844	1	1	0	0	0	0	0	0	0	mmu-miR-30e-5p	-0.18	-0.18	0.66	2005, 2007, 2009, 2011
PER2	ENST00000254658.3	period circadian clock 2	106	2	1	1	0	1	0	1	0	0	mmu-miR-30b-5p	-0.18	-0.18	0.92	2005, 2007, 2009, 2011
ARHGEF3	ENST00000296315.3	Rho guanine nucleotide exchange factor (GEF) 3	359	2	1	0	1	0	0	0	0	0	mmu-miR-30e-5p	-0.18	-0.18	0.79	2005, 2007, 2009, 2011
FAM126B	ENST00000418596.3	family with sequence similarity 126, member B	132	1	1	0	0	1	0	0	1	0	mmu-miR-384-5p	-0.18	-0.73	0.7	2011
IRF4	ENST00000380956.4	interferon regulatory factor 4	10	1	1	0	0	0	0	0	0	0	mmu-miR-30b-5p	-0.18	-0.18	0.95	2005, 2007, 2009, 2011
EPHB2	ENST00000374632.3	EPH receptor B2	297	1	1	0	0	0	0	0	0	0	mmu-miR-30a-5p	-0.18	-0.18	0.85	2005, 2007, 2009, 2011
MBNL3	ENST00000370839.3	muscleblind-like splicing regulator 3	593	1	1	0	0	1	0	1	0	0	mmu-miR-30b-5p	-0.18	-0.22	0.95	2005, 2007, 2009, 2011
RBFOX1	ENST00000355637.4	RNA binding protein, fox-1 homolog (C. elegans) 1	5	1	1	0	0	0	0	0	0	0	mmu-miR-30b-5p	-0.18	-0.18	0.81	2005, 2007, 2009, 2011
ARID4B	ENST00000349213.3	AT rich interactive domain 4B (RBP1-like)	940	1	1	0	0	0	0	0	0	0	mmu-miR-30b-5p	-0.17	-0.17	0.84	2005, 2007, 2009, 2011
CMPK2	ENST00000256722.5	cytidine monophosphate (UMP-CMP) kinase 2, mitochondrial	13	1	1	0	0	0	0	0	0	1	mmu-miR-30b-5p	-0.17	-0.18	< 0.1	2009, 2011
NT5E	ENST00000369651.3	5'-nucleotidase, ecto (CD73)	285	2	1	1	0	0	0	0	0	0	mmu-miR-384-5p	-0.17	-0.29	0.8	2007, 2009, 2011
UBN2	ENST00000473989.3	ubinuclein 2	238	2	1	1	0	1	1	0	0	0	mmu-miR-384-5p	-0.17	-0.19	0.99	2009, 2011
TTLL7	ENST00000260505.8	tubulin tyrosine ligase-like family, member 7	93	1	1	0	0	1	0	0	1	1	mmu-miR-30b-5p	-0.17	-0.18	0.95	2007, 2009, 2011
SAMD4A	ENST00000392067.3	sterile alpha motif domain containing 4A	449	1	1	0	0	0	0	0	0	0	mmu-miR-30b-5p	-0.17	-0.2	0.93	2011
DLGAP4	ENST00000373913.3	discs, large (Drosophila) homolog-associated protein 4	1188	1	1	0	0	0	0	0	0	0	mmu-miR-384-5p	-0.17	-0.18	0.94	2005, 2007, 2009, 2011
SETD5	ENST00000402198.1	SET domain containing 5	48	2	1	1	0	0	0	0	0	0	mmu-miR-30e-5p	-0.17	-0.31	0.79	2007, 2009, 2011
EPB41L3	ENST00000341928.2	erythrocyte membrane protein band 4.1-like 3	179	1	1	0	0	0	0	0	0	0	mmu-miR-30e-5p	-0.17	-0.18	0.62	2009, 2011
CHD7	ENST00000423902.2	chromodomain helicase DNA binding protein 7	925	2	1	0	1	1	0	1	0	0	mmu-miR-384-5p	-0.17	-0.34	> 0.99	2011
GRIA2	ENST00000296526.7	glutamate receptor, ionotropic, AMPA 2	5	1	1	0	0	0	0	0	0	0	mmu-miR-30b-5p	-0.17	-0.17	0.74	2007, 2009, 2011
PLXNA2	ENST00000367033.3	plexin A2	8	1	1	0	0	0	0	0	0	2	mmu-miR-30e-5p	-0.17	-0.17	0.95	2007, 2009, 2011
TDG	ENST00000392872.3	thymine-DNA glycosylase	201	1	1	0	0	0	0	0	0	0	mmu-miR-30b-5p	-0.17	-0.17	0.94	2005, 2007, 2009, 2011
TNXB	ENST00000375244.3	tenascin XB	5	1	1	0	0	0	0	0	0	0	mmu-miR-30a-5p	-0.17	-0.17	0.73	2011
FBXO34	ENST00000313833.4	F-box protein 34	80	1	1	0	0	0	0	0	0	0	mmu-miR-30b-5p	-0.17	-0.17	0.95	2005, 2007, 2009, 2011
FAM13A	ENST00000395002.2	family with sequence similarity 13, member A	441	1	1	0	0	0	0	0	0	0	mmu-miR-30a-5p	-0.17	-0.17	0.95	2005, 2007, 2009, 2011
VKORC1L1	ENST00000360768.3	vitamin K epoxide reductase complex, subunit 1-like 1	2291	1	1	0	0	0	0	0	0	1	mmu-miR-30b-5p	-0.17	-0.34	0.95	2005, 2007, 2009, 2011
GLI2	ENST00000452319.1	GLI family zinc finger 2	73	2	1	1	0	1	1	0	0	0	mmu-miR-30e-5p	-0.16	-0.17	0.96	2003, 2007, 2009, 2011
PCDH17	ENST00000377918.3	protocadherin 17	477	2	1	1	0	0	0	0	0	0	mmu-miR-30e-5p	-0.16	-0.16	0.99	2005, 2007, 2009, 2011
TENM3	ENST00000511685.1	teneurin transmembrane protein 3	30	1	1	0	0	0	0	0	0	0	mmu-miR-30e-5p	-0.16	-0.16	0.9	2007, 2009, 2011
GZF1	ENST00000338121.5	GDNF-inducible zinc finger protein 1	252	1	1	0	0	1	0	1	0	0	mmu-miR-384-5p	-0.16	-0.17	0.77	2007, 2009, 2011
PCDH20	ENST00000409204.4	protocadherin 20	50	1	1	0	0	0	0	0	0	0	mmu-miR-30b-5p	-0.16	-0.16	0.66	2011
TNRC6C	ENST00000335749.4	trinucleotide repeat containing 6C	248	2	1	1	0	0	0	0	0	0	mmu-miR-30b-5p	-0.16	-0.17	0.99	2011
CHMP2B	ENST00000263780.4	charged multivesicular body protein 2B	810	1	1	0	0	0	0	0	0	0	mmu-miR-30a-5p	-0.16	-0.41	0.13	2007, 2009, 2011
PHF16	ENST00000397189.1	PHD finger protein 16	95	1	1	0	0	0	0	0	0	0	mmu-miR-30b-5p	-0.16	-0.16	0.77	2005, 2007, 2009, 2011
PIN4	ENST00000218432.5	protein (peptidylprolyl cis/trans isomerase) NIMA-interacting, 4 (parvulin)	29	1	1	0	0	0	0	0	0	0	mmu-miR-30e-5p	-0.16	-0.16	ORF
FLVCR1	ENST00000366971.4	feline leukemia virus subgroup C cellular receptor 1	322	1	1	0	0	1	1	0	0	0	mmu-miR-30b-5p	-0.16	-0.23	0.76	2011
RNF165	ENST00000269439.7	ring finger protein 165	18	3	1	1	1	0	0	0	0	0	mmu-miR-30e-5p	-0.16	-0.16	0.97	2007, 2009, 2011
PCDH10	ENST00000264360.5	protocadherin 10	9	2	1	1	0	0	0	0	0	0	mmu-miR-30b-5p	-0.16	-0.16	0.96	2005, 2007, 2009, 2011
SBF1	ENST00000380817.3	SET binding factor 1	2045	1	1	0	0	0	0	0	0	0	mmu-miR-30d-5p	-0.16	-0.16	0.95	2007, 2009, 2011
PHACTR2	ENST00000427704.2	phosphatase and actin regulator 2	274	1	1	0	0	1	0	1	0	0	mmu-miR-30a-5p	-0.16	-0.18	0.93	2005, 2007, 2009, 2011
RAPGEF2	ENST00000264431.4	Rap guanine nucleotide exchange factor (GEF) 2	484	1	1	0	0	0	0	0	0	0	mmu-miR-30a-5p	-0.16	-0.16	0.85	2009, 2011
ZBTB7A	ENST00000322357.4	zinc finger and BTB domain containing 7A	37	1	1	0	0	0	0	0	0	0	mmu-miR-30a-5p	-0.16	-0.16	0.95	2007, 2009, 2011
SMARCD2	ENST00000448276.2	SWI/SNF related, matrix associated, actin dependent regulator of chromatin, subfamily d, member 2	144	1	1	0	0	0	0	0	0	0	mmu-miR-30a-5p	-0.16	-0.16	0.78	2005, 2007, 2009, 2011
PPP3R1	ENST00000234310.3	protein phosphatase 3, regulatory subunit B, alpha	117	1	1	0	0	0	0	0	0	0	mmu-miR-30b-5p	-0.16	-0.4	0.84	2005, 2007, 2009, 2011
ATP2B2	ENST00000352432.4	ATPase, Ca++ transporting, plasma membrane 2	170	1	1	0	0	1	0	0	1	0	mmu-miR-30b-5p	-0.16	-0.16	0.95	2005, 2007, 2009, 2011
ARID5B	ENST00000279873.7	AT rich interactive domain 5B (MRF1-like)	397	1	1	0	0	0	0	0	0	0	mmu-miR-30e-5p	-0.16	-0.16	0.87	2007, 2009, 2011
ACAP2	ENST00000326793.6	ArfGAP with coiled-coil, ankyrin repeat and PH domains 2	253	2	1	1	0	0	0	0	0	0	mmu-miR-30a-5p	-0.15	-0.19	0.71	2005, 2007, 2009, 2011
SOX12	ENST00000342665.2	SRY (sex determining region Y)-box 12	6341	1	1	0	0	0	0	0	0	0	mmu-miR-30e-5p	-0.15	-0.15	0.95	2005, 2007, 2009, 2011
UNC5C	ENST00000453304.1	unc-5 homolog C (C. elegans)	60	1	1	0	0	0	0	0	0	0	mmu-miR-384-5p	-0.15	-0.15	0.95	2005, 2007, 2009, 2011
SCN2A	ENST00000375437.2	sodium channel, voltage-gated, type II, alpha subunit	7	2	1	1	0	0	0	0	0	1	mmu-miR-30e-5p	-0.15	-0.15	0.93	2007, 2009, 2011
MAFG	ENST00000357736.4	v-maf avian musculoaponeurotic fibrosarcoma oncogene homolog G	5	1	1	0	0	0	0	0	0	0	mmu-miR-30b-5p	-0.15	-0.15	0.94	2005, 2007, 2009, 2011
ELL	ENST00000262809.4	elongation factor RNA polymerase II	250	1	1	0	0	0	0	0	0	0	mmu-miR-30b-5p	-0.15	-0.2	0.94	2005, 2007, 2009, 2011
KCTD7	ENST00000275532.3	potassium channel tetramerization domain containing 7	693	1	1	0	0	0	0	0	0	0	mmu-miR-30e-5p	-0.15	-0.15	0.95	2005, 2007, 2009, 2011
TMOD2	ENST00000249700.4	tropomodulin 2 (neuronal)	117	1	1	0	0	1	1	0	0	0	mmu-miR-384-5p	-0.15	-0.17	0.95	2005, 2007, 2009, 2011
LCOR	ENST00000371103.3	ligand dependent nuclear receptor corepressor	94	1	1	0	0	0	0	0	0	0	mmu-miR-30e-5p	-0.15	-0.16	0.89	2011
LMLN	ENST00000330198.4	leishmanolysin-like (metallopeptidase M8 family)	18	1	1	0	0	0	0	0	0	0	mmu-miR-30b-5p	-0.15	-0.18	0.44	2007, 2009, 2011
UBE2V2	ENST00000523111.2	ubiquitin-conjugating enzyme E2 variant 2	1770	1	1	0	0	1	0	1	0	0	mmu-miR-30e-5p	-0.15	-0.69	0.95	2005, 2007, 2009, 2011
UBN1	ENST00000262376.6	ubinuclein 1	586	1	1	0	0	0	0	0	0	0	mmu-miR-30a-5p	-0.15	-0.15	0.94	2005, 2007, 2009, 2011
POLR3G	ENST00000504930.1	polymerase (RNA) III (DNA directed) polypeptide G (32kD)	67	2	1	1	0	1	1	0	0	0	mmu-miR-30c-5p	-0.14	-0.64	0.76	2005, 2007, 2009, 2011
ZNF644	ENST00000370440.1	zinc finger protein 644	40	1	1	0	0	1	0	0	1	2	mmu-miR-30b-5p	-0.14	-0.34	0.86	2005, 2007, 2009, 2011
BAHD1	ENST00000416165.1	bromo adjacent homology domain containing 1	76	1	1	0	0	0	0	0	0	0	mmu-miR-30b-5p	-0.14	-0.15	0.95	2005, 2007, 2009, 2011
FAM83F	ENST00000333407.6	family with sequence similarity 83, member F	5	1	1	0	0	1	1	0	0	0	mmu-miR-384-5p	-0.14	-0.14	0.95	2007, 2009, 2011
NTNG1	ENST00000370067.1	netrin G1	5	2	1	0	1	0	0	0	0	0	mmu-miR-30e-5p	-0.14	-0.14	0.82	2007, 2009, 2011
GRM3	ENST00000361669.2	glutamate receptor, metabotropic 3	10	1	1	0	0	0	0	0	0	0	mmu-miR-384-5p	-0.14	-0.14	0.22	2005, 2007, 2009, 2011
HOXA2	ENST00000222718.5	homeobox A2	14	1	1	0	0	0	0	0	0	0	mmu-miR-384-5p	-0.14	-0.31	0.2
ARHGEF6	ENST00000370620.1	Rac/Cdc42 guanine nucleotide exchange factor (GEF) 6	15	1	1	0	0	0	0	0	0	0	mmu-miR-30b-5p	-0.14	-0.19	0.95	2005, 2007, 2009, 2011
ITGB3	ENST00000559488.1	integrin, beta 3 (platelet glycoprotein IIIa, antigen CD61)	176	1	1	0	0	0	0	0	0	0	mmu-miR-30b-5p	-0.14	-0.14	0.95	2005, 2007, 2009, 2011
CARF	ENST00000402905.3	calcium responsive transcription factor	27	1	1	0	0	0	0	0	0	0	mmu-miR-30b-5p	-0.14	-0.2	0.12	2009, 2011
PAWR	ENST00000328827.4	PRKC, apoptosis, WT1, regulator	1872	1	1	0	0	0	0	0	0	1	mmu-miR-384-5p	-0.14	-0.37	0.95	2005, 2007, 2009, 2011
LRCH2	ENST00000317135.8	leucine-rich repeats and calponin homology (CH) domain containing 2	52	1	1	0	0	0	0	0	0	0	mmu-miR-30b-5p	-0.14	-0.14	0.8	2005, 2007, 2009, 2011
PPP2R1B	ENST00000527614.1	protein phosphatase 2, regulatory subunit A, beta	341	1	1	0	0	0	0	0	0	0	mmu-miR-30b-5p	-0.13	-0.15	0.4	2005, 2007, 2009
CALU	ENST00000535011.2	calumenin	3079	1	1	0	0	1	0	0	1	0	mmu-miR-30b-5p	-0.13	-0.36	0.78	2005, 2007, 2009, 2011
EFNA3	ENST00000505139.1	Ephrin-A3; Uncharacterized protein; cDNA FLJ57652, highly similar to Ephrin-A3	9	2	1	0	1	0	0	0	0	0	mmu-miR-30b-5p	-0.13	-0.33	0.9
GRAMD2	ENST00000309731.7	GRAM domain containing 2	5	1	1	0	0	0	0	0	0	0	mmu-miR-30b-5p	-0.13	-0.13	0.67	2007, 2009, 2011
PKNOX2	ENST00000298282.9	PBX/knotted 1 homeobox 2	46	1	1	0	0	0	0	0	0	0	mmu-miR-30b-5p	-0.13	-0.13	0.15	2009, 2011
DIO2	ENST00000438257.4	deiodinase, iodothyronine, type II	98	1	1	0	0	0	0	0	0	0	mmu-miR-384-5p	-0.13	-0.22	0.67	2005, 2007, 2009, 2011
SOGA3	ENST00000556132.1	SOGA family member 3	95	1	1	0	0	2	0	0	2	0	mmu-miR-30b-5p	-0.13	-0.14	0.53	2011
GMNC	ENST00000442080.1	geminin coiled-coil domain containing	19	1	1	0	0	0	0	0	0	0	mmu-miR-30a-5p	-0.13	-0.13	0.88	2011
PPAPDC2	ENST00000381883.2	phosphatidic acid phosphatase type 2 domain containing 2	263	1	1	0	0	0	0	0	0	0	mmu-miR-384-5p	-0.13	-0.16	< 0.1
YTHDF3	ENST00000539294.1	YTH domain family, member 3	444	1	1	0	0	1	0	1	0	0	mmu-miR-30e-5p	-0.13	-0.27	0.64	2005, 2007, 2009, 2011
JAG2	ENST00000331782.3	jagged 2	68	1	1	0	0	0	0	0	0	0	mmu-miR-30a-5p	-0.13	-0.15	0.95	2005, 2007, 2009, 2011
TAB3	ENST00000378933.1	TGF-beta activated kinase 1/MAP3K7 binding protein 3	201	1	1	0	0	0	0	0	0	0	mmu-miR-30e-5p	-0.13	-0.13	0.89	2007, 2009, 2011
ME1	ENST00000369705.3	malic enzyme 1, NADP(+)-dependent, cytosolic	586	1	1	0	0	0	0	0	0	0	mmu-miR-30e-5p	-0.13	-0.15	0.63	2007, 2009, 2011
BEAN1	ENST00000299694.8	brain expressed, associated with NEDD4, 1	16	1	1	0	0	0	0	0	0	0	mmu-miR-30a-5p	-0.13	-0.18	0.95	2011
TRPS1	ENST00000395715.3	trichorhinophalangeal syndrome I	94	1	1	0	0	1	0	0	1	0	mmu-miR-384-5p	-0.13	-0.13	0.9	2005, 2007, 2009, 2011
GJA1	ENST00000282561.3	gap junction protein, alpha 1, 43kDa	1732	1	1	0	0	0	0	0	0	0	mmu-miR-30e-5p	-0.12	-0.12	0.85	2005, 2007, 2009, 2011
B3GAT1	ENST00000392580.1	beta-1,3-glucuronyltransferase 1 (glucuronosyltransferase P)	77	1	1	0	0	0	0	0	0	0	mmu-miR-384-5p	-0.12	-0.12	0.8	2009, 2011
ZNF746	ENST00000340622.3	zinc finger protein 746	54	1	1	0	0	0	0	0	0	0	mmu-miR-30b-5p	-0.12	-0.28	0.93	2007, 2009, 2011
CBX7	ENST00000216133.5	chromobox homolog 7	5	1	1	0	0	0	0	0	0	0	mmu-miR-30a-5p	-0.12	-0.12	0.54	2009, 2011
RIMKLB	ENST00000357529.3	ribosomal modification protein rimK-like family member B	164	1	1	0	0	0	0	0	0	0	mmu-miR-384-5p	-0.12	-0.14	0.16
ATAD5	ENST00000321990.4	ATPase family, AAA domain containing 5	66	1	1	0	0	0	0	0	0	0	mmu-miR-30a-5p	-0.12	-0.19	< 0.1
DPY19L1	ENST00000310974.4	dpy-19-like 1 (C. elegans)	80	1	1	0	0	0	0	0	0	0	mmu-miR-30b-5p	-0.12	-0.29	0.86	2009, 2011
CELF1	ENST00000395290.2	CUGBP, Elav-like family member 1	153	2	1	0	1	0	0	0	0	0	mmu-miR-384-5p	-0.12	-0.14	0.86	2011
MYO5A	ENST00000399231.3	myosin VA (heavy chain 12, myoxin)	573	1	1	0	0	2	1	0	1	0	mmu-miR-30a-5p	-0.12	-0.15	0.96	2011
KMT2C	ENST00000262189.6	lysine (K)-specific methyltransferase 2C	417	1	1	0	0	0	0	0	0	0	mmu-miR-30b-5p	-0.12	-0.12	0.9	2007, 2009, 2011
FAM210B	ENST00000371384.3	family with sequence similarity 210, member B	55	1	1	0	0	0	0	0	0	0	mmu-miR-30a-5p	-0.12	-0.31	0.85	2005, 2007, 2009, 2011
KLF8	ENST00000468660.1	Kruppel-like factor 8	8	1	1	0	0	2	0	1	1	0	mmu-miR-384-5p	-0.12	-0.35	0.66	2011
SH2B3	ENST00000341259.2	SH2B adaptor protein 3	89	1	1	0	0	0	0	0	0	0	mmu-miR-30a-5p	-0.12	-0.12	0.95	2009, 2011
DDX19B	ENST00000288071.6	DEAD (Asp-Glu-Ala-Asp) box polypeptide 19B	690	1	1	0	0	0	0	0	0	0	mmu-miR-384-5p	-0.12	-0.27	0.95	2009, 2011
C9orf41	ENST00000376834.3	chromosome 9 open reading frame 41	248	1	1	0	0	0	0	0	0	0	mmu-miR-30a-5p	-0.12	-0.12	0.14
FZD3	ENST00000240093.3	frizzled family receptor 3	192	1	1	0	0	1	0	0	1	0	mmu-miR-30b-5p	-0.11	-0.36	0.99	2011
ABAT	ENST00000569156.1	4-aminobutyrate aminotransferase	66	1	1	0	0	0	0	0	0	0	mmu-miR-30b-5p	-0.11	-0.27	0.95	2009, 2011
EDA	ENST00000374553.2	ectodysplasin A	9	1	1	0	0	0	0	0	0	0	mmu-miR-30a-5p	-0.11	-0.11	0.86	2009, 2011
PIK3CD	ENST00000536656.1	phosphatidylinositol-4,5-bisphosphate 3-kinase, catalytic subunit delta	5	1	1	0	0	0	0	0	0	0	mmu-miR-30b-5p	-0.11	-0.11	0.25	2011
FNDC3A	ENST00000492622.2	fibronectin type III domain containing 3A	122	1	1	0	0	0	0	0	0	1	mmu-miR-30b-5p	-0.11	-0.26	0.72	2005, 2007, 2009, 2011
DGKQ	ENST00000273814.3	diacylglycerol kinase, theta 110kDa	184	1	1	0	0	0	0	0	0	0	mmu-miR-30b-5p	-0.11	-0.11	< 0.1	2009, 2011
LRP6	ENST00000261349.4	low density lipoprotein receptor-related protein 6	157	1	1	0	0	0	0	0	0	1	mmu-miR-30a-5p	-0.11	-0.12	0.94	2009, 2011
ABCD2	ENST00000308666.3	ATP-binding cassette, sub-family D (ALD), member 2	5	1	1	0	0	0	0	0	0	1	mmu-miR-384-5p	-0.11	-0.11	0.47
DPYSL2	ENST00000311151.5	dihydropyrimidinase-like 2	3087	1	1	0	0	1	0	1	0	0	mmu-miR-30b-5p	-0.11	-0.11	0.75	2005, 2007, 2009, 2011
FNIP2	ENST00000264433.6	folliculin interacting protein 2	266	1	1	0	0	1	0	0	1	1	mmu-miR-384-5p	-0.11	-0.12	0.79
DACT1	ENST00000395153.3	dishevelled-binding antagonist of beta-catenin 1	248	1	1	0	0	0	0	0	0	0	mmu-miR-30e-5p	-0.11	-0.28	0.14	2009, 2011
ZDHHC17	ENST00000426126.2	zinc finger, DHHC-type containing 17	117	1	1	0	0	0	0	0	0	0	mmu-miR-30a-5p	-0.11	-0.15	0.86	2005, 2007, 2009, 2011
GIGYF1	ENST00000275732.5	GRB10 interacting GYF protein 1	5	1	1	0	0	0	0	0	0	1	mmu-miR-30c-5p	-0.11	-0.11	0.77	2007, 2009, 2011
C10orf76	ENST00000370033.4	chromosome 10 open reading frame 76	273	1	1	0	0	0	0	0	0	0	mmu-miR-384-5p	-0.11	-0.15	0.92	2005, 2007, 2009, 2011
PITPNM2	ENST00000280562.5	phosphatidylinositol transfer protein, membrane-associated 2	66	1	1	0	0	0	0	0	0	0	mmu-miR-30e-5p	-0.11	-0.13	0.82	2007, 2009, 2011
HNRNPUL2	ENST00000301785.5	heterogeneous nuclear ribonucleoprotein U-like 2	2321	1	1	0	0	1	0	1	0	0	mmu-miR-30e-5p	-0.11	-0.37	0.9	2011
AFF4	ENST00000265343.5	AF4/FMR2 family, member 4	2755	1	1	0	0	0	0	0	0	0	mmu-miR-384-5p	-0.1	-0.11	0.95	2007, 2009, 2011
CCDC97	ENST00000269967.3	coiled-coil domain containing 97	85	1	1	0	0	0	0	0	0	0	mmu-miR-30a-5p	-0.1	-0.15	0.95	2007, 2009, 2011
BNIP3L	ENST00000380629.2	BCL2/adenovirus E1B 19kDa interacting protein 3-like	191	2	1	0	1	0	0	0	0	1	mmu-miR-384-5p	-0.1	-0.66	0.94	2005, 2007, 2009, 2011
EML4	ENST00000318522.5	echinoderm microtubule associated protein like 4	62	1	1	0	0	0	0	0	0	0	mmu-miR-30a-5p	-0.1	-0.29	0.82	2005, 2007, 2009, 2011
CTH	ENST00000411986.2	cystathionase (cystathionine gamma-lyase)	430	1	1	0	0	1	0	0	1	0	mmu-miR-384-5p	-0.1	-0.63	0.95	2009, 2011
TULP4	ENST00000367094.2	tubby like protein 4	93	1	1	0	0	2	0	1	1	1	mmu-miR-30b-5p	-0.1	-0.12	0.81	2005, 2007, 2009, 2011
LRRC40	ENST00000370952.3	leucine rich repeat containing 40	88	1	1	0	0	3	1	1	1	1	mmu-miR-30b-5p	-0.1	-0.38	0.14	2011
SLC12A6	ENST00000397707.2	solute carrier family 12 (potassium/chloride transporter), member 6	17	1	1	0	0	0	0	0	0	0	mmu-miR-384-5p	-0.1	-0.2	0.93	2011
NACC2	ENST00000371753.1	NACC family member 2, BEN and BTB (POZ) domain containing	172	1	1	0	0	0	0	0	0	0	mmu-miR-384-5p	-0.1	-0.15	0.94	2011
DSTYK	ENST00000367160.4	dual serine/threonine and tyrosine protein kinase	256	1	1	0	0	0	0	0	0	0	mmu-miR-30a-5p	-0.1	-0.11	0.94	2005, 2007, 2009, 2011
STAG2	ENST00000371160.1	stromal antigen 2	216	1	1	0	0	0	0	0	0	0	mmu-miR-30b-5p	-0.1	-0.1	0.61	2005, 2007, 2009, 2011
CEACAM1	ENST00000403444.3	carcinoembryonic antigen-related cell adhesion molecule 1 (biliary glycoprotein)	925	1	1	0	0	0	0	0	0	0	mmu-miR-30a-5p	-0.1	-0.1	0.22	2009, 2011
SLC7A6	ENST00000219343.6	solute carrier family 7 (amino acid transporter light chain, y+L system), member 6	1044	1	1	0	0	0	0	0	0	0	mmu-miR-30e-5p	-0.1	-0.16	0.9	2009, 2011
WIPF3	ENST00000409290.1	WAS/WASL interacting protein family, member 3	168	1	1	0	0	0	0	0	0	0	mmu-miR-30a-5p	-0.1	-0.12	0.87	2011
ARID1A	ENST00000324856.7	AT rich interactive domain 1A (SWI-like)	31	1	1	0	0	0	0	0	0	1	mmu-miR-30e-5p	-0.1	-0.1	< 0.1	2005, 2007, 2011
FBXO32	ENST00000517956.1	F-box protein 32	500	1	1	0	0	1	0	0	1	0	mmu-miR-30e-5p	-0.1	-0.16	0.86
PRLR	ENST00000342362.5	prolactin receptor	95	1	1	0	0	3	1	2	0	0	mmu-miR-30a-5p	-0.09	-0.13	0.32	2005, 2007
CSNK1G1	ENST00000303052.7	casein kinase 1, gamma 1	149	1	1	0	0	0	0	0	0	0	mmu-miR-30a-5p	-0.09	-0.09	0.81	2005, 2007, 2009, 2011
FAM131B	ENST00000443739.2	family with sequence similarity 131, member B	5	1	1	0	0	0	0	0	0	0	mmu-miR-30a-5p	-0.09	-0.09	0.94	2007, 2009, 2011
AFAP1L2	ENST00000304129.4	actin filament associated protein 1-like 2	13	1	1	0	0	1	1	0	0	0	mmu-miR-30a-5p	-0.09	-0.09	0.88	2007, 2009, 2011
FAM219B	ENST00000357635.5	family with sequence similarity 219, member B	270	1	1	0	0	0	0	0	0	0	mmu-miR-384-5p	-0.09	-0.23	0.19	2009, 2011
LPP	ENST00000312675.4	LIM domain containing preferred translocation partner in lipoma	1894	1	1	0	0	1	1	0	0	0	mmu-miR-30b-5p	-0.09	-0.09	0.86	2005, 2007, 2009, 2011
MAT2A	ENST00000306434.3	methionine adenosyltransferase II, alpha	8	1	1	0	0	0	0	0	0	0	mmu-miR-30c-5p	-0.09	-0.15	0.5	2005, 2007, 2009, 2011
RASGEF1B	ENST00000509081.1	RasGEF domain family, member 1B	20	1	1	0	0	0	0	0	0	0	mmu-miR-384-5p	-0.09	-0.09	0.76
CDK12	ENST00000447079.4	cyclin-dependent kinase 12	748	1	1	0	0	1	0	1	0	0	mmu-miR-30a-5p	-0.09	-0.1	0.75	2009, 2011
RAI14	ENST00000265109.3	retinoic acid induced 14	2228	1	1	0	0	0	0	0	0	1	mmu-miR-30a-5p	-0.09	-0.13	0.95	2005, 2007, 2009, 2011
IFNAR2	ENST00000404220.3	interferon (alpha, beta and omega) receptor 2	470	1	1	0	0	0	0	0	0	0	mmu-miR-30e-5p	-0.09	-0.2	0.75	2009, 2011
EDC3	ENST00000315127.4	enhancer of mRNA decapping 3	328	2	1	0	1	0	0	0	0	0	mmu-miR-30b-5p	-0.09	-0.27	0.98	2007, 2009, 2011
CEP170	ENST00000366542.1	centrosomal protein 170kDa	6	1	1	0	0	0	0	0	0	0	mmu-miR-30b-5p	-0.09	-0.09	0.11
MARCH6	ENST00000274140.5	membrane-associated ring finger (C3HC4) 6, E3 ubiquitin protein ligase	14086	1	1	0	0	0	0	0	0	1	mmu-miR-30e-5p	-0.08	-0.1	0.74	2007, 2009, 2011
XKR4	ENST00000327381.6	XK, Kell blood group complex subunit-related family, member 4	5	1	1	0	0	1	0	0	1	1	mmu-miR-30b-5p	-0.08	-0.08	0.86	2009, 2011
FAM124A	ENST00000322475.8	family with sequence similarity 124A	5	1	1	0	0	0	0	0	0	0	mmu-miR-30a-5p	-0.08	-0.08	0.88	2011
PALM2	ENST00000448454.2	paralemmin 2	35	1	1	0	0	1	1	0	0	1	mmu-miR-384-5p	-0.08	-0.09	0.95	2007, 2009, 2011
PRRT2	ENST00000300797.6	proline-rich transmembrane protein 2	33	1	1	0	0	0	0	0	0	0	mmu-miR-30b-5p	-0.08	-0.08	0.83	2007, 2009, 2011
WDR70	ENST00000265107.4	WD repeat domain 70	23	1	1	0	0	0	0	0	0	0	mmu-miR-30e-5p	-0.08	-0.1	0.24
HDAC9	ENST00000405010.3	histone deacetylase 9	13	1	1	0	0	1	0	0	1	1	mmu-miR-30b-5p	-0.08	-0.21	0.76	2009, 2011
APBA1	ENST00000265381.4	amyloid beta (A4) precursor protein-binding, family A, member 1	12	1	1	0	0	0	0	0	0	0	mmu-miR-30e-5p	-0.07	-0.07	0.95	2011
KIAA0355	ENST00000299505.6	KIAA0355	538	1	1	0	0	0	0	0	0	0	mmu-miR-30e-5p	-0.07	-0.12	0.95	2005, 2007, 2009, 2011
ATP2A2	ENST00000395494.2	ATPase, Ca++ transporting, cardiac muscle, slow twitch 2	2042	1	1	0	0	0	0	0	0	0	mmu-miR-30a-5p	-0.07	-0.08	0.78	2005, 2007, 2011
GDA	ENST00000358399.3	guanine deaminase	5	1	1	0	0	1	0	0	1	0	mmu-miR-30b-5p	-0.07	-0.07	0.11	2009, 2011
KSR1	ENST00000398988.3	kinase suppressor of ras 1	256	1	1	0	0	0	0	0	0	1	mmu-miR-30b-5p	-0.07	-0.08	< 0.1	2007, 2009, 2011
TMEM56	ENST00000370203.4	transmembrane protein 56	113	1	1	0	0	1	0	0	1	0	mmu-miR-30a-5p	-0.07	-0.11	0.14
CMTM4	ENST00000394106.2	CKLF-like MARVEL transmembrane domain containing 4	22	1	1	0	0	0	0	0	0	1	mmu-miR-30b-5p	-0.07	-0.23	0.95	2007, 2009, 2011
PXN	ENST00000458477.2	paxillin	484	1	1	0	0	0	0	0	0	0	mmu-miR-384-5p	-0.07	-0.07	0.85	2009, 2011
GPT2	ENST00000340124.4	glutamic pyruvate transaminase (alanine aminotransferase) 2	1750	1	1	0	0	0	0	0	0	0	mmu-miR-30a-5p	-0.07	-0.21	< 0.1	2005, 2007, 2009, 2011
RASA2	ENST00000286364.3	RAS p21 protein activator 2	170	1	1	0	0	0	0	0	0	1	mmu-miR-30e-5p	-0.07	-0.07	0.94
KATNBL1	ENST00000256544.3	katanin p80 subunit B-like 1	105	1	1	0	0	1	0	0	1	1	mmu-miR-30e-5p	-0.07	-0.7	0.98	2005, 2007, 2009, 2011
FUBP1	ENST00000370767.1	far upstream element (FUSE) binding protein 1	2021	1	1	0	0	1	0	0	1	0	mmu-miR-30b-5p	-0.07	-0.18	< 0.1
RIMBP2	ENST00000261655.4	RIMS binding protein 2	7	1	1	0	0	2	0	2	0	0	mmu-miR-30a-5p	-0.07	-0.07	0.2	2007, 2009, 2011
DCX	ENST00000356915.2	doublecortin	5	1	1	0	0	0	0	0	0	0	mmu-miR-30e-5p	-0.06	-0.06	0.28	2005, 2007, 2009, 2011
SEMA6D	ENST00000355997.3	sema domain, transmembrane domain (TM), and cytoplasmic domain, (semaphorin) 6D	179	1	1	0	0	0	0	0	0	1	mmu-miR-384-5p	-0.06	-0.07	0.78	2005, 2007, 2009, 2011
AP5M1	ENST00000261558.3	adaptor-related protein complex 5, mu 1 subunit	198	1	1	0	0	1	0	1	0	1	mmu-miR-30b-5p	-0.06	-0.3	0.91
ICK	ENST00000350082.5	intestinal cell (MAK-like) kinase	18	1	1	0	0	2	1	0	1	0	mmu-miR-384-5p	-0.06	-0.16	0.88	2005, 2007, 2009, 2011
VAV3	ENST00000370056.4	vav 3 guanine nucleotide exchange factor	1128	1	1	0	0	0	0	0	0	0	mmu-miR-30b-5p	-0.06	-0.06	0.82	2009, 2011
ZMYND8	ENST00000311275.7	zinc finger, MYND-type containing 8	235	1	1	0	0	0	0	0	0	2	mmu-miR-30a-5p	-0.06	-0.06	0.61	2007, 2009, 2011
RNMT	ENST00000383314.2	RNA (guanine-7-) methyltransferase	64	1	1	0	0	0	0	0	0	1	mmu-miR-30b-5p	-0.06	-0.09	< 0.1	2005, 2007, 2009, 2011
CEP350	ENST00000367607.3	centrosomal protein 350kDa	705	1	1	0	0	1	0	0	1	2	mmu-miR-384-5p	-0.06	-0.07	0.75	2007, 2009, 2011
KCNN3	ENST00000271915.4	potassium intermediate/small conductance calcium-activated channel, subfamily N, member 3	5	1	1	0	0	1	1	0	0	0	mmu-miR-30a-5p	-0.06	-0.06	0.92	2011
CEP170B	ENST00000414716.3	centrosomal protein 170B	326	2	1	1	0	0	0	0	0	0	mmu-miR-30a-5p	-0.06	-0.06	0.85	2007, 2009, 2011
SLC35A3	ENST00000465289.1	solute carrier family 35 (UDP-N-acetylglucosamine (UDP-GlcNAc) transporter), member A3	191	1	1	0	0	0	0	0	0	0	mmu-miR-30a-5p	-0.06	-0.11	0.25
SYPL1	ENST00000470347.1	synaptophysin-like 1	2423	1	1	0	0	1	0	1	0	0	mmu-miR-384-5p	-0.06	-0.55	0.48	2007, 2009, 2011
ANKS4B	ENST00000311620.5	ankyrin repeat and sterile alpha motif domain containing 4B	40	1	1	0	0	0	0	0	0	0	mmu-miR-384-5p	-0.06	-0.33	0.69
RCOR1	ENST00000262241.6	REST corepressor 1	403	1	1	0	0	0	0	0	0	0	mmu-miR-30a-5p	-0.06	-0.09	0.95	2007, 2009, 2011
PTPN4	ENST00000263708.2	protein tyrosine phosphatase, non-receptor type 4 (megakaryocyte)	215	1	1	0	0	0	0	0	0	3	mmu-miR-30b-5p	-0.06	-0.13	0.77
RASD1	ENST00000579152.1	RAS, dexamethasone-induced 1	6	1	1	0	0	0	0	0	0	0	mmu-miR-30b-5p	-0.06	-0.44	0.91	2005, 2007, 2009, 2011
NAA25	ENST00000261745.4	N(alpha)-acetyltransferase 25, NatB auxiliary subunit	919	1	1	0	0	0	0	0	0	1	mmu-miR-30a-5p	-0.05	-0.2	0.93	2007, 2009, 2011
ITGA6	ENST00000375221.2	integrin, alpha 6	1328	1	1	0	0	0	0	0	0	0	mmu-miR-30b-5p	-0.05	-0.05	0.82	2005, 2007, 2009, 2011
FBXL20	ENST00000394294.3	F-box and leucine-rich repeat protein 20	455	1	1	0	0	2	0	1	1	0	mmu-miR-30b-5p	-0.05	-0.2	0.94	2005, 2007, 2009, 2011
SDK2	ENST00000392650.3	sidekick cell adhesion molecule 2	8	1	1	0	0	2	0	0	2	0	mmu-miR-30b-5p	-0.05	-0.05	0.87	2011
CPSF6	ENST00000435070.2	cleavage and polyadenylation specific factor 6, 68kDa	5819	1	1	0	0	5	1	3	1	1	mmu-miR-384-5p	-0.05	-0.7	0.87	2005, 2007, 2009, 2011
CHKA	ENST00000265689.4	choline kinase alpha	352	1	1	0	0	0	0	0	0	0	mmu-miR-30e-5p	-0.05	-0.32	0.42	2005, 2007, 2009, 2011
TRIP12	ENST00000283943.5	thyroid hormone receptor interactor 12	145	1	1	0	0	1	1	0	0	1	mmu-miR-30b-5p	-0.05	-0.07	0.48
KLF12	ENST00000377669.2	Kruppel-like factor 12	251	1	1	0	0	0	0	0	0	1	mmu-miR-30b-5p	-0.05	-0.06	0.45	2009, 2011
PDE4D	ENST00000340635.6	phosphodiesterase 4D, cAMP-specific	747	1	1	0	0	1	1	0	0	0	mmu-miR-30a-5p	-0.05	-0.06	0.95	2005, 2007, 2009, 2011
PROSER1	ENST00000352251.3	proline and serine rich 1	145	1	1	0	0	0	0	0	0	0	mmu-miR-30b-5p	-0.05	-0.13	0.58	2005, 2007, 2009, 2011
AMER1	ENST00000330258.3	APC membrane recruitment protein 1	11	1	1	0	0	1	1	0	0	2	mmu-miR-30a-5p	-0.05	-0.06	0.9	2007, 2009, 2011
SCN8A	ENST00000354534.6	sodium channel, voltage gated, type VIII, alpha subunit	44	1	1	0	0	0	0	0	0	0	mmu-miR-30b-5p	-0.04	-0.04	0.88	2005, 2007, 2009, 2011
MSI2	ENST00000284073.2	musashi RNA-binding protein 2	283	1	1	0	0	0	0	0	0	1	mmu-miR-384-5p	-0.04	-0.3	0.82
ATXN1	ENST00000244769.4	ataxin 1	106	1	1	0	0	1	1	0	0	0	mmu-miR-30a-5p	-0.04	-0.06	0.23	2005, 2007, 2009, 2011
KIAA0226L	ENST00000378781.3	KIAA0226-like	21	1	1	0	0	0	0	0	0	0	mmu-miR-30e-5p	-0.04	-0.14	0.46	2005, 2007, 2009, 2011
RPS6KA5	ENST00000261991.3	ribosomal protein S6 kinase, 90kDa, polypeptide 5	64	1	1	0	0	1	0	1	0	0	mmu-miR-30e-5p	-0.04	-0.22	0.93
SLC7A11	ENST00000280612.5	solute carrier family 7 (anionic amino acid transporter light chain, xc- system), member 11	61	1	1	0	0	1	0	0	1	1	mmu-miR-384-5p	-0.04	-0.31	0.93	2007, 2009, 2011
TIMP3	ENST00000266085.6	TIMP metallopeptidase inhibitor 3	7421	1	1	0	0	1	0	1	0	0	mmu-miR-30b-5p	-0.04	-0.41	0.95	2005, 2007, 2009, 2011
CRY2	ENST00000443527.2	cryptochrome 2 (photolyase-like)	63	1	1	0	0	0	0	0	0	0	mmu-miR-30b-5p	-0.04	-0.04	0.43	2009, 2011
SALL4	ENST00000217086.4	sal-like 4 (Drosophila)	155	1	1	0	0	0	0	0	0	0	mmu-miR-30e-5p	-0.04	-0.04	0.95
NEURL1B	ENST00000369800.5	neuralized homolog 1B (Drosophila)	5	1	1	0	0	0	0	0	0	0	mmu-miR-30e-5p	-0.04	-0.04	0.93	2011
AGPAT4	ENST00000366911.5	1-acylglycerol-3-phosphate O-acyltransferase 4	142	1	1	0	0	0	0	0	0	0	mmu-miR-30b-5p	-0.04	-0.07	< 0.1	2009, 2011
SEC62	ENST00000337002.4	SEC62 homolog (S. cerevisiae)	746	1	1	0	0	0	0	0	0	1	mmu-miR-30a-5p	-0.04	-0.11	0.68	2009, 2011
AGO1	ENST00000373204.4	argonaute RISC catalytic component 1	402	1	1	0	0	1	0	0	1	1	mmu-miR-30a-5p	-0.04	-0.04	0.95	2005, 2007, 2009, 2011
USP37	ENST00000258399.3	ubiquitin specific peptidase 37	14	1	1	0	0	1	0	0	1	0	mmu-miR-30e-5p	-0.04	-0.09	0.77	2005, 2007, 2009, 2011
YAF2	ENST00000327791.4	YY1 associated factor 2	413	1	1	0	0	0	0	0	0	0	mmu-miR-30a-5p	-0.04	-0.44	0.95	2009, 2011
CCDC6	ENST00000263102.6	coiled-coil domain containing 6	193	1	1	0	0	0	0	0	0	1	mmu-miR-30e-5p	-0.03	-0.12	0.58	2009, 2011
NAV1	ENST00000295624.6	neuron navigator 1	702	1	1	0	0	1	0	0	1	1	mmu-miR-30a-5p	-0.03	-0.04	0.91	2005, 2007, 2009, 2011
ABCA3	ENST00000301732.5	ATP-binding cassette, sub-family A (ABC1), member 3	338	1	1	0	0	0	0	0	0	0	mmu-miR-30b-5p	-0.03	-0.03	< 0.1	2009, 2011
CBX8	ENST00000269385.4	chromobox homolog 8	474	1	1	0	0	0	0	0	0	0	mmu-miR-30a-5p	-0.03	-0.27	0.95
HIC2	ENST00000407464.2	hypermethylated in cancer 2	28	1	1	0	0	0	0	0	0	1	mmu-miR-384-5p	-0.03	-0.19	0.95	2005, 2007, 2009, 2011
TENM1	ENST00000371130.3	teneurin transmembrane protein 1	5	1	1	0	0	0	0	0	0	0	mmu-miR-30a-5p	-0.03	-0.03	0.95	2011
DAGLA	ENST00000257215.5	diacylglycerol lipase, alpha	1262	1	1	0	0	0	0	0	0	0	mmu-miR-30a-5p	-0.03	-0.03	0.91	2007, 2009, 2011
ASXL3	ENST00000269197.5	additional sex combs like 3 (Drosophila)	65	1	1	0	0	0	0	0	0	0	mmu-miR-30a-5p	-0.03	-0.03	0.9
NRK	ENST00000243300.9	Nik related kinase	5	1	1	0	0	0	0	0	0	0	mmu-miR-30a-5p	-0.03	-0.03	0.81	2005, 2007, 2009, 2011
KMT2A	ENST00000534358.1	lysine (K)-specific methyltransferase 2A	1092	1	1	0	0	0	0	0	0	1	mmu-miR-30a-5p	-0.03	-0.03	0.78	2005, 2007, 2009, 2011
CECR6	ENST00000399875.1	cat eye syndrome chromosome region, candidate 6	5	1	1	0	0	0	0	0	0	0	mmu-miR-30a-5p	-0.03	-0.03	0.73	2005, 2007, 2009, 2011
KIAA1522	ENST00000401073.2	KIAA1522	13	1	1	0	0	0	0	0	0	0	mmu-miR-30a-5p	-0.03	-0.03	0.72	2007, 2009, 2011
KIF21B	ENST00000332129.2	kinesin family member 21B	12	1	1	0	0	0	0	0	0	0	mmu-miR-30a-5p	-0.03	-0.03	0.68	2009, 2011
PLXNC1	ENST00000258526.4	plexin C1	47	1	1	0	0	0	0	0	0	0	mmu-miR-30a-5p	-0.03	-0.03	0.67	2011
TTBK1	ENST00000259750.4	tau tubulin kinase 1	7	1	1	0	0	0	0	0	0	0	mmu-miR-30a-5p	-0.03	-0.03	0.53	2005, 2007, 2009, 2011
SEPT8	ENST00000378706.1	septin 8	199	1	1	0	0	0	0	0	0	0	mmu-miR-30a-5p	-0.03	-0.03	0.38	2011
EDNRB	ENST00000377211.4	endothelin receptor type B	5	1	1	0	0	0	0	0	0	0	mmu-miR-30a-5p	-0.03	-0.03	0.26	2005, 2007, 2009, 2011
LYST	ENST00000389794.3	lysosomal trafficking regulator	9	1	1	0	0	0	0	0	0	0	mmu-miR-30a-5p	-0.03	-0.03	0.22	2005, 2007, 2009, 2011
TBC1D2B	ENST00000409931.3	TBC1 domain family, member 2B	5	1	1	0	0	0	0	0	0	0	mmu-miR-30a-5p	-0.03	-0.03	0.2	2009, 2011
RAB27B	ENST00000262094.5	RAB27B, member RAS oncogene family	5	1	1	0	0	0	0	0	0	0	mmu-miR-30a-5p	-0.03	-0.03	0.19	2011
ERMAP	ENST00000372514.3	erythroblast membrane-associated protein (Scianna blood group)	121	1	1	0	0	0	0	0	0	0	mmu-miR-30a-5p	-0.03	-0.03	< 0.1	2009, 2011
TSPYL4	ENST00000420283.1	TSPY-like 4	5	1	1	0	0	0	0	0	0	0	mmu-miR-30a-5p	-0.03	-0.03	< 0.1	2011
MKL2	ENST00000318282.5	MKL/myocardin-like 2	992	1	1	0	0	0	0	0	0	0	mmu-miR-30a-5p	-0.03	-0.03	0.9	2009, 2011
CAMKK2	ENST00000538733.1	calcium/calmodulin-dependent protein kinase kinase 2, beta	1157	1	1	0	0	0	0	0	0	0	mmu-miR-30a-5p	-0.03	-0.03	0.52	2005, 2007, 2009, 2011
STC1	ENST00000290271.2	stanniocalcin 1	2932	1	1	0	0	0	0	0	0	0	mmu-miR-30a-5p	-0.03	-0.03	0.16	2005, 2007, 2009, 2011
MFSD6	ENST00000392328.1	major facilitator superfamily domain containing 6	47	1	1	0	0	2	0	1	1	0	mmu-miR-30e-5p	-0.03	-0.17	0.95	2005, 2007, 2009, 2011
SSX2IP	ENST00000342203.3	synovial sarcoma, X breakpoint 2 interacting protein	197	1	1	0	0	1	0	1	0	0	mmu-miR-30b-5p	-0.03	-0.06	0.91	2005, 2007, 2009, 2011
PPP1R9A	ENST00000289495.5	protein phosphatase 1, regulatory subunit 9A	46	1	1	0	0	0	0	0	0	0	mmu-miR-30a-5p	-0.03	-0.03	0.95	2007, 2009, 2011
SCYL3	ENST00000367771.6	SCY1-like 3 (S. cerevisiae)	124	1	1	0	0	0	0	0	0	0	mmu-miR-30a-5p	-0.03	-0.03	0.95	2005, 2007, 2009, 2011
MNT	ENST00000174618.4	MNT, MAX dimerization protein	146	1	1	0	0	0	0	0	0	0	mmu-miR-30a-5p	-0.03	-0.03	0.6	2005, 2007, 2009, 2011
DCP1A	ENST00000607628.1	decapping mRNA 1A	87	1	1	0	0	0	0	0	0	0	mmu-miR-30a-5p	-0.03	-0.03	0.32	2011
DOCK7	ENST00000251157.5	dedicator of cytokinesis 7	66	1	1	0	0	1	0	1	0	0	mmu-miR-30e-5p	-0.03	-0.33	0.93	2005, 2007, 2009, 2011
MFHAS1	ENST00000276282.6	malignant fibrous histiocytoma amplified sequence 1	130	1	1	0	0	0	0	0	0	1	mmu-miR-384-5p	-0.03	-0.03	0.35	2009, 2011
C20orf112	ENST00000359676.5	chromosome 20 open reading frame 112	148	1	1	0	0	0	0	0	0	0	mmu-miR-30b-5p	-0.02	-0.06	0.95	2011
OXTR	ENST00000316793.3	oxytocin receptor	24	1	1	0	0	0	0	0	0	0	mmu-miR-30a-5p	-0.02	-0.04	< 0.1
SETD7	ENST00000274031.3	SET domain containing (lysine methyltransferase) 7	76	1	1	0	0	1	0	1	0	0	mmu-miR-30e-5p	-0.02	-0.17	0.95	2007, 2009, 2011
KLF10	ENST00000285407.6	Kruppel-like factor 10	320	1	1	0	0	0	0	0	0	0	mmu-miR-384-5p	-0.02	-0.3	0.95	2005, 2007, 2009, 2011
USP47	ENST00000339865.5	ubiquitin specific peptidase 47	665	1	1	0	0	0	0	0	0	0	mmu-miR-30e-5p	-0.02	-0.14	0.95	2007, 2009, 2011
RAB8A	ENST00000300935.3	RAB8A, member RAS oncogene family	226	1	1	0	0	0	0	0	0	0	mmu-miR-30b-5p	-0.02	-0.4	0.95	2005, 2007, 2009, 2011
EIF5A2	ENST00000474096.1	eukaryotic translation initiation factor 5A2	443	1	1	0	0	0	0	0	0	0	mmu-miR-30a-5p	-0.02	-0.35	0.68	2005, 2007, 2009, 2011
FST	ENST00000396947.3	follistatin	53	1	1	0	0	0	0	0	0	0	mmu-miR-30d-5p	-0.02	-0.24	0.88
ZNF148	ENST00000360647.4	zinc finger protein 148	230	1	1	0	0	0	0	0	0	0	mmu-miR-30a-5p	-0.02	-0.03	0.74	2007, 2009, 2011
IGSF3	ENST00000369486.3	immunoglobulin superfamily, member 3	141	1	1	0	0	0	0	0	0	0	mmu-miR-30e-5p	-0.02	-0.05	0.39
TRIO	ENST00000344204.4	trio Rho guanine nucleotide exchange factor	365	1	1	0	0	0	0	0	0	0	mmu-miR-30b-5p	-0.02	-0.06	0.83
NUFIP2	ENST00000225388.4	nuclear fragile X mental retardation protein interacting protein 2	440	1	1	0	0	0	0	0	0	0	mmu-miR-30b-5p	-0.02	-0.11	0.93	2007, 2009, 2011
WDR26	ENST00000414423.2	WD repeat domain 26	1229	1	1	0	0	0	0	0	0	2	mmu-miR-384-5p	-0.02	-0.06	< 0.1	2009, 2011
STRIP1	ENST00000369795.3	striatin interacting protein 1	114	1	1	0	0	0	0	0	0	0	mmu-miR-30b-5p	-0.02	-0.14	0.9	2005, 2007, 2009, 2011
LIFR	ENST00000263409.4	leukemia inhibitory factor receptor alpha	44	2	1	1	0	0	0	0	0	1	mmu-miR-384-5p	-0.02	-0.09	0.96	2007, 2009, 2011
SRGAP3	ENST00000383836.3	SLIT-ROBO Rho GTPase activating protein 3	38	1	1	0	0	2	0	0	2	1	mmu-miR-30e-5p	-0.02	-0.08	0.7	2005, 2007, 2009, 2011
HOXD11	ENST00000249504.5	homeobox D11	124	1	1	0	0	0	0	0	0	1	mmu-miR-384-5p	-0.02	-0.05	0.95
DGKI	ENST00000453654.2	diacylglycerol kinase, iota	16	1	1	0	0	1	0	0	1	0	mmu-miR-30e-5p	-0.02	-0.06	< 0.1
NF1	ENST00000358273.4	neurofibromin 1	161	1	1	0	0	0	0	0	0	0	mmu-miR-30a-5p	-0.02	-0.03	0.75	2011
PLXNA1	ENST00000393409.2	plexin A1	189	1	1	0	0	0	0	0	0	0	mmu-miR-30a-5p	-0.02	-0.03	0.91	2007, 2009, 2011
REV1	ENST00000393445.3	REV1, polymerase (DNA directed)	1210	1	1	0	0	0	0	0	0	0	mmu-miR-30b-5p	-0.02	-0.32	0.95	2007, 2009, 2011
CHRM3	ENST00000255380.4	cholinergic receptor, muscarinic 3	47	1	1	0	0	0	0	0	0	0	mmu-miR-30a-5p	-0.01	-0.03	0.95
EED	ENST00000327320.4	embryonic ectoderm development	142	1	1	0	0	1	0	1	0	0	mmu-miR-30b-5p	-0.01	-0.71	0.95	2003, 2005, 2007, 2009, 2011
GIGYF2	ENST00000373566.3	GRB10 interacting GYF protein 2	361	1	1	0	0	0	0	0	0	0	mmu-miR-384-5p	-0.01	-0.14	0.8	2005, 2007, 2009, 2011
EPB41L4B	ENST00000374557.4	erythrocyte membrane protein band 4.1 like 4B	135	1	1	0	0	0	0	0	0	0	mmu-miR-30e-5p	-0.01	-0.16	0.9	2011
TCF21	ENST00000367882.4	transcription factor 21	552	1	1	0	0	1	0	1	0	0	mmu-miR-30e-5p	-0.01	-0.11	0.95
TOR1B	ENST00000259339.2	torsin family 1, member B (torsin B)	222	1	1	0	0	0	0	0	0	0	mmu-miR-30d-5p	-0.01	-0.14	0.71	2009, 2011
C14orf28	ENST00000325192.3	chromosome 14 open reading frame 28	98	1	1	0	0	0	0	0	0	1	mmu-miR-30b-5p	-0.01	-0.17	0.46	2009, 2011
HCFC2	ENST00000229330.4	host cell factor C2	46	1	1	0	0	0	0	0	0	1	mmu-miR-30a-5p	-0.01	-0.12	0.95	2011
BRAP	ENST00000419234.4	BRCA1 associated protein	102	1	1	0	0	0	0	0	0	0	mmu-miR-30a-5p	-0.01	-0.03	0.51	2011
TRIM36	ENST00000282369.3	tripartite motif containing 36	85	1	1	0	0	0	0	0	0	0	mmu-miR-30b-5p	-0.01	-0.18	0.11	2009, 2011
MAP4K4	ENST00000413150.2	mitogen-activated protein kinase kinase kinase kinase 4	1551	1	1	0	0	0	0	0	0	0	mmu-miR-30d-5p	-0.01	-0.18	0.88	2005, 2007, 2009, 2011
RAB32	ENST00000367495.3	RAB32, member RAS oncogene family	1894	1	1	0	0	0	0	0	0	0	mmu-miR-30e-5p	-0.01	-0.45	0.95	2005, 2007, 2009, 2011
IDE	ENST00000265986.6	insulin-degrading enzyme	446	1	1	0	0	0	0	0	0	0	mmu-miR-30b-5p	-0.01	-0.09	0.95	2011
DIP2C	ENST00000280886.6	DIP2 disco-interacting protein 2 homolog C (Drosophila)	359	1	1	0	0	0	0	0	0	0	mmu-miR-30a-5p	-0.01	-0.03	< 0.1	2011
ZNF507	ENST00000311921.4	zinc finger protein 507	378	1	1	0	0	0	0	0	0	1	mmu-miR-30b-5p	-0.01	-0.05	0.92	2005, 2007, 2009, 2011
R3HDM1	ENST00000264160.4	R3H domain containing 1	195	1	1	0	0	0	0	0	0	0	mmu-miR-30c-5p	-0.01	-0.34	0.86	2007, 2009, 2011
PLEKHA6	ENST00000272203.3	pleckstrin homology domain containing, family A member 6	45	1	1	0	0	0	0	0	0	0	mmu-miR-30a-5p	-0.01	-0.03	0.13	2009, 2011
PITPNC1	ENST00000580974.1	phosphatidylinositol transfer protein, cytoplasmic 1	797	1	1	0	0	1	0	1	0	1	mmu-miR-30e-5p	-0.01	-0.15	0.34
MECP2	ENST00000303391.6	methyl CpG binding protein 2 (Rett syndrome)	1474	1	1	0	0	0	0	0	0	0	mmu-miR-30a-5p	-0.01	-0.03	0.38	2005, 2007, 2009, 2011
ERG	ENST00000398905.1	v-ets avian erythroblastosis virus E26 oncogene homolog	184	1	1	0	0	0	0	0	0	0	mmu-miR-30b-5p	-0.01	-0.21	0.95	2005, 2007, 2009, 2011
VPS53	ENST00000437048.2	vacuolar protein sorting 53 homolog (S. cerevisiae)	1332	1	1	0	0	0	0	0	0	0	mmu-miR-30a-5p	0	-0.03	0.23	2011
NADK	ENST00000341426.5	NAD kinase	173	1	1	0	0	0	0	0	0	0	mmu-miR-30a-5p	0	-0.15	0.95	2007, 2009, 2011
VSTM4	ENST00000332853.4	V-set and transmembrane domain containing 4	59	1	1	0	0	0	0	0	0	0	mmu-miR-384-5p	0	-0.05	0.95	2011
SNX6	ENST00000396526.3	sorting nexin 6	254	1	1	0	0	0	0	0	0	0	mmu-miR-384-5p	0	-0.21	< 0.1	2005, 2007, 2009, 2011
SLC35A5	ENST00000492406.1	solute carrier family 35, member A5	168	1	1	0	0	0	0	0	0	0	mmu-miR-30e-5p	0	-0.11	0.7	2009, 2011
PPID	ENST00000307720.3	peptidylprolyl isomerase D	1544	1	1	0	0	0	0	0	0	0	mmu-miR-30a-5p	0	-0.55	0.95	2005, 2007, 2009, 2011
ADAM9	ENST00000487273.2	ADAM metallopeptidase domain 9	6435	1	1	0	0	0	0	0	0	0	mmu-miR-384-5p	0	-0.3	0.92	2009, 2011
TNIK	ENST00000436636.2	TRAF2 and NCK interacting kinase	106	1	1	0	0	0	0	0	0	0	mmu-miR-30a-5p	0	-0.03	0.95
AQR	ENST00000156471.5	aquarius intron-binding spliceosomal factor	314	1	1	0	0	0	0	0	0	0	mmu-miR-30a-5p	0	-0.03	0.11
MEF2D	ENST00000464356.2	myocyte enhancer factor 2D	759	1	1	0	0	0	0	0	0	1	mmu-miR-30a-5p	0	-0.07	0.27	2009, 2011
PRCD	ENST00000592014.1	progressive rod-cone degeneration	5	1	1	0	0	0	0	0	0	0	mmu-miR-30a-5p	0	-0.22	0.83
TVP23B	ENST00000307767.8	trans-golgi network vesicle protein 23 homolog B (S. cerevisiae)	5	1	1	0	0	0	0	0	0	0	mmu-miR-30a-5p	0	-0.22	0.48	2009, 2011
VCAN	ENST00000265077.3	versican	542	1	1	0	0	1	0	0	1	0	mmu-miR-384-5p	0	-0.17	< 0.1
WISP1	ENST00000517423.1	WNT1 inducible signaling pathway protein 1	5	1	1	0	0	0	0	0	0	0	mmu-miR-30a-5p	0	-0.21	< 0.1
PNPLA2	ENST00000336615.4	patatin-like phospholipase domain containing 2	6586	1	1	0	0	0	0	0	0	0	mmu-miR-30a-5p	0	-0.5	0.82	2011
GPR26	ENST00000284674.1	G protein-coupled receptor 26	5	1	1	0	0	1	0	0	1	0	mmu-miR-30a-5p	0	-0.1	0.95	2011
C3orf18	ENST00000426034.1	chromosome 3 open reading frame 18	29	1	1	0	0	0	0	0	0	0	mmu-miR-30a-5p	0	-0.56	0.89	2011
GALNT2	ENST00000366672.4	UDP-N-acetyl-alpha-D-galactosamine:polypeptide N-acetylgalactosaminyltransferase 2 (GalNAc-T2)	2834	1	1	0	0	0	0	0	0	0	mmu-miR-30a-5p	0	-0.03	0.57	2005, 2007, 2009, 2011
GRIN2A	ENST00000562109.1	glutamate receptor, ionotropic, N-methyl D-aspartate 2A	5	1	1	0	0	1	1	0	0	0	mmu-miR-30a-5p	0	-0.06	0.92	2011
NRG3	ENST00000372142.2	neuregulin 3	27	1	1	0	0	0	0	0	0	0	mmu-miR-30a-5p	0	-0.2	0.82	2011
PCNXL2	ENST00000258229.9	pecanex-like 2 (Drosophila)	49	1	1	0	0	0	0	0	0	0	mmu-miR-30a-5p	0	-0.3	0.23
CELF3	ENST00000290585.4	CUGBP, Elav-like family member 3	5	1	1	0	0	0	0	0	0	0	mmu-miR-30a-5p	0	-0.22	0.95	2005, 2007, 2009, 2011
TRPM7	ENST00000560955.1	transient receptor potential cation channel, subfamily M, member 7	281	1	1	0	0	0	0	0	0	1	mmu-miR-30a-5p	0	-0.31	0.95	2005, 2007, 2009, 2011
SMAP1	ENST00000370452.3	small ArfGAP 1	64	1	1	0	0	0	0	0	0	0	mmu-miR-30a-5p	0	-0.26	0.9	2009, 2011
PGM2L1	ENST00000298198.4	phosphoglucomutase 2-like 1	183	1	0	1	0	3	0	2	1	1	mmu-miR-30e-5p	-0.6	-0.7	0.72	2009, 2011
DOLPP1	ENST00000540102.1	dolichyldiphosphatase 1	963	2	0	1	1	0	0	0	0	0	mmu-miR-30e-5p	-0.58	-0.58	0.94	2005, 2007, 2009, 2011
ZDHHC21	ENST00000380916.4	zinc finger, DHHC-type containing 21	196	1	0	1	0	3	1	1	1	0	mmu-miR-30e-5p	-0.56	-0.59	0.7	2005, 2007, 2009, 2011
C10orf11	ENST00000496424.2	chromosome 10 open reading frame 11	5	1	0	1	0	1	1	0	0	0	mmu-miR-384-5p	-0.55	-0.55	0.71
FOXG1	ENST00000382535.3	forkhead box G1	40	2	0	2	0	1	0	1	0	0	mmu-miR-30e-5p	-0.53	-0.7	0.91	2003, 2005, 2007, 2009, 2011
PTPN13	ENST00000436978.1	protein tyrosine phosphatase, non-receptor type 13 (APO-1/CD95 (Fas)-associated phosphatase)	97	2	0	2	0	0	0	0	0	0	mmu-miR-384-5p	-0.52	-0.52	0.83	2005, 2007, 2009, 2011
C7orf43	ENST00000394035.2	chromosome 7 open reading frame 43	5436	2	0	1	1	0	0	0	0	0	mmu-miR-384-5p	-0.48	-0.48	0.93	2007, 2009, 2011
RAP2C	ENST00000342983.2	RAP2C, member of RAS oncogene family	604	2	0	2	0	0	0	0	0	1	mmu-miR-384-5p	-0.47	-0.48	0.9	2005, 2007, 2009, 2011
CALB2	ENST00000349553.5	calbindin 2	5	2	0	1	1	0	0	0	0	0	mmu-miR-30e-5p	-0.45	-0.45	0.93	2009, 2011
IRX4	ENST00000231357.2	iroquois homeobox 4	5	2	0	0	2	0	0	0	0	1	mmu-miR-30e-5p	-0.44	-0.44	0.95	2005, 2007, 2009, 2011
REEP3	ENST00000373758.4	receptor accessory protein 3	1095	1	0	1	0	1	1	0	0	0	mmu-miR-30b-5p	-0.44	-0.55	0.71	2007, 2009, 2011
SMAD1	ENST00000302085.4	SMAD family member 1	240	1	0	0	1	2	0	0	2	0	mmu-miR-384-5p	-0.44	-0.45	0.91	2005, 2007, 2009, 2011
ELAVL2	ENST00000380110.4	ELAV like neuron-specific RNA binding protein 2	78	1	0	0	1	2	0	1	1	0	mmu-miR-30b-5p	-0.44	-0.48	0.95	2005, 2007
NRIP1	ENST00000400199.1	nuclear receptor interacting protein 1	342	2	0	1	1	1	0	1	0	0	mmu-miR-30a-5p	-0.43	-0.46	0.94	2005, 2007, 2009, 2011
RARB	ENST00000437042.2	retinoic acid receptor, beta	48	2	0	2	0	0	0	0	0	0	mmu-miR-30b-5p	-0.43	-0.43	0.9	2005, 2007, 2009, 2011
PPP3CA	ENST00000512215.1	protein phosphatase 3, catalytic subunit, alpha isozyme	259	2	0	0	2	0	0	0	0	0	mmu-miR-30b-5p	-0.43	-0.43	0.95	2005, 2007, 2009, 2011
MAP3K2	ENST00000409947.1	mitogen-activated protein kinase kinase kinase 2	187	1	0	0	1	3	1	1	1	1	mmu-miR-384-5p	-0.43	-0.44	0.95	2011
E2F7	ENST00000416496.2	E2F transcription factor 7	308	2	0	0	2	0	0	0	0	0	mmu-miR-384-5p	-0.43	-0.44	0.95	2005, 2007, 2009, 2011
PPP1R18	ENST00000399199.3	protein phosphatase 1, regulatory subunit 18	265	3	0	0	3	0	0	0	0	0	mmu-miR-30e-5p	-0.42	-0.42	0.99	2011
FKBP14	ENST00000222803.5	FK506 binding protein 14, 22 kDa	939	1	0	1	0	1	0	0	1	0	mmu-miR-30e-5p	-0.41	-0.51	0.91
FKBP3	ENST00000216330.3	FK506 binding protein 3, 25kDa	3211	1	0	1	0	0	0	0	0	0	mmu-miR-30c-5p	-0.41	-0.41	0.62	2005, 2007, 2009, 2011
AP3S1	ENST00000316788.7	adaptor-related protein complex 3, sigma 1 subunit	24	1	0	1	0	0	0	0	0	1	mmu-miR-30e-5p	-0.4	-0.4	0.68	2005, 2007, 2009, 2011
DOC2A	ENST00000350119.4	double C2-like domains, alpha	10	2	0	1	1	0	0	0	0	0	mmu-miR-30b-5p	-0.4	-0.4	0.92	2005, 2007, 2009, 2011
SLC35D3	ENST00000331858.4	solute carrier family 35, member D3	13	2	0	2	0	0	0	0	0	0	mmu-miR-30e-5p	-0.4	-0.4	0.83	2005, 2007, 2009, 2011
FRMD6	ENST00000395718.2	FERM domain containing 6	508	1	0	1	0	1	0	0	1	0	mmu-miR-30e-5p	-0.4	-0.41	0.91	2007, 2011
PRDM1	ENST00000369089.3	PR domain containing 1, with ZNF domain	48	3	0	1	2	0	0	0	0	0	mmu-miR-384-5p	-0.39	-0.52	0.99	2005, 2007, 2009, 2011
ARL6IP6	ENST00000326446.5	ADP-ribosylation-like factor 6 interacting protein 6	1454	1	0	1	0	1	0	0	1	0	mmu-miR-30b-5p	-0.39	-0.48	0.71	2005, 2007, 2009, 2011
PBRM1	ENST00000356770.4	polybromo 1	689	2	0	0	2	0	0	0	0	0	mmu-miR-30b-5p	-0.39	-0.39	0.95	2007, 2009, 2011
PABPC1L2A	ENST00000373519.1	poly(A) binding protein, cytoplasmic 1-like 2A	5	2	0	1	1	1	0	1	0	0	mmu-miR-30a-5p	-0.38	-0.38	0.89	2011
PPARGC1A	ENST00000264867.2	peroxisome proliferator-activated receptor gamma, coactivator 1 alpha	19	3	0	1	2	0	0	0	0	0	mmu-miR-30e-5p	-0.38	-0.39	0.99	2005, 2007, 2009, 2011
SLC35F3	ENST00000366618.3	solute carrier family 35, member F3	5	2	0	1	1	0	0	0	0	1	mmu-miR-384-5p	-0.37	-0.37	0.91
OTUD4	ENST00000454497.2	OTU domain containing 4	18	2	0	2	0	0	0	0	0	0	mmu-miR-384-5p	-0.37	-0.37	0.89	2007, 2009
NAP1L5	ENST00000323061.5	nucleosome assembly protein 1-like 5	28	1	0	1	0	1	1	0	0	0	mmu-miR-30b-5p	-0.37	-0.57	0.71	2009, 2011
PABPC1L2B	ENST00000373521.2	poly(A) binding protein, cytoplasmic 1-like 2B	5	2	0	1	1	1	0	1	0	0	mmu-miR-30a-5p	-0.37	-0.37	0.89	2011
COL25A1	ENST00000399132.1	collagen, type XXV, alpha 1	270	1	0	0	1	1	0	0	1	1	mmu-miR-384-5p	-0.37	-0.38	0.94
HOXB8	ENST00000239144.4	homeobox B8	9	1	0	0	1	0	0	0	0	1	mmu-miR-30c-5p	-0.36	-0.36	0.78	2005, 2007, 2009, 2011
VAMP3	ENST00000054666.6	vesicle-associated membrane protein 3	515	1	0	1	0	1	0	0	1	0	mmu-miR-30b-5p	-0.35	-0.52	0.68	2009, 2011
LRRC58	ENST00000295628.3	leucine rich repeat containing 58	940	1	0	1	0	1	0	0	1	0	mmu-miR-30e-5p	-0.35	-0.36	0.67	2009, 2011
RABGAP1L	ENST00000489615.1	RAB GTPase activating protein 1-like	364	1	0	1	0	2	0	2	0	0	mmu-miR-30a-5p	-0.34	-0.34	0.71
CCDC178	ENST00000581852.1	coiled-coil domain containing 178	7	1	0	1	0	0	0	0	0	0	mmu-miR-30b-5p	-0.34	-0.34	0.7	2009, 2011
IL1A	ENST00000263339.3	interleukin 1, alpha	5	1	0	1	0	1	0	1	0	0	mmu-miR-384-5p	-0.33	-0.33	0.64	2005, 2007, 2009, 2011
METTL1	ENST00000257848.7	methyltransferase like 1	285	1	0	1	0	0	0	0	0	0	mmu-miR-384-5p	-0.33	-0.33	0.55	2009, 2011
DLG5	ENST00000372391.2	discs, large homolog 5 (Drosophila)	10	2	0	1	1	0	0	0	0	0	mmu-miR-30e-5p	-0.33	-0.33	0.94	2005, 2007, 2009, 2011
SLC35F4	ENST00000556826.1	solute carrier family 35, member F4	5	1	0	0	1	0	0	0	0	0	mmu-miR-30e-5p	-0.33	-0.33	0.78	2007, 2009, 2011
GNA13	ENST00000439174.2	guanine nucleotide binding protein (G protein), alpha 13	190	2	0	0	2	1	0	0	1	0	mmu-miR-384-5p	-0.33	-0.34	0.95	2005, 2007, 2009, 2011
VIM	ENST00000224237.5	vimentin	31747	1	0	0	1	0	0	0	0	1	mmu-miR-384-5p	-0.33	-0.33	0.78	2005, 2007
SNX16	ENST00000353788.4	sorting nexin 16	156	1	0	0	1	0	0	0	0	0	mmu-miR-30b-5p	-0.32	-0.32	0.78	2005, 2007, 2009, 2011
TIA1	ENST00000433529.2	TIA1 cytotoxic granule-associated RNA binding protein	1370	1	0	1	0	1	1	0	0	1	mmu-miR-384-5p	-0.32	-0.33	0.68	2007, 2011
SIX4	ENST00000216513.4	SIX homeobox 4	94	1	0	1	0	1	0	0	1	1	mmu-miR-30b-5p	-0.32	-0.36	0.68	2007, 2009, 2011
MBNL1	ENST00000357472.3	muscleblind-like splicing regulator 1	135	1	0	0	1	0	0	0	0	2	mmu-miR-30e-5p	-0.32	-0.32	0.78	2009, 2011
SEC61A2	ENST00000379020.4	Sec61 alpha 2 subunit (S. cerevisiae)	105	1	0	0	1	0	0	0	0	0	mmu-miR-384-5p	-0.32	-0.32	0.78	2005, 2007, 2011
GCLC	ENST00000229416.6	glutamate-cysteine ligase, catalytic subunit	1001	1	0	1	0	0	0	0	0	0	mmu-miR-30a-5p	-0.32	-0.32	0.71	2009, 2011
ZCCHC2	ENST00000269499.5	zinc finger, CCHC domain containing 2	13	2	0	2	0	0	0	0	0	0	mmu-miR-30b-5p	-0.31	-0.31	0.91	2005, 2007, 2009, 2011
FRMPD1	ENST00000377765.3	FERM and PDZ domain containing 1	5	1	0	1	0	0	0	0	0	0	mmu-miR-384-5p	-0.31	-0.31	0.57	2005, 2007, 2009, 2011
UBE2D3	ENST00000453744.2	ubiquitin-conjugating enzyme E2D 3	2312	1	0	1	0	0	0	0	0	0	mmu-miR-384-5p	-0.31	-0.35	0.61	2009, 2011
HLF	ENST00000226067.5	hepatic leukemia factor	15	1	0	1	0	0	0	0	0	1	mmu-miR-30e-5p	-0.3	-0.3	0.71	2005, 2007, 2009, 2011
MSANTD4	ENST00000301919.4	Myb/SANT-like DNA-binding domain containing 4 with coiled-coils	304	1	0	0	1	0	0	0	0	0	mmu-miR-30b-5p	-0.3	-0.3	0.78
FANCF	ENST00000327470.3	Fanconi anemia, complementation group F	282	1	0	0	1	1	0	1	0	0	mmu-miR-384-5p	-0.3	-0.44	0.78	2011
UBE2F	ENST00000272930.4	ubiquitin-conjugating enzyme E2F (putative)	905	1	0	1	0	0	0	0	0	0	mmu-miR-30a-5p	-0.3	-0.33	0.71	2007, 2011
SGK3	ENST00000345714.4	serum/glucocorticoid regulated kinase family, member 3	56	1	0	0	1	1	0	1	0	0	mmu-miR-384-5p	-0.3	-0.38	0.78	2007, 2009, 2011
NAV3	ENST00000228327.6	neuron navigator 3	277	2	0	0	2	0	0	0	0	1	mmu-miR-384-5p	-0.3	-0.3	0.95	2005, 2007, 2009, 2011
CAMK2N2	ENST00000296238.3	calcium/calmodulin-dependent protein kinase II inhibitor 2	39	1	0	1	0	0	0	0	0	0	mmu-miR-30a-5p	-0.3	-0.3	0.66	2011
C8orf44-SGK3	ENST00000519289.1	C8orf44-SGK3 readthrough	56	1	0	0	1	1	0	1	0	0	mmu-miR-384-5p	-0.3	-0.39	0.78	2011
PDCL	ENST00000259467.4	phosducin-like	154	1	0	1	0	1	0	1	0	0	mmu-miR-384-5p	-0.3	-0.35	0.71	2005, 2007, 2009, 2011
PRRX1	ENST00000367760.3	paired related homeobox 1	57	1	0	0	1	0	0	0	0	1	mmu-miR-384-5p	-0.3	-0.3	< 0.1
NHS	ENST00000380060.3	Nance-Horan syndrome (congenital cataracts and dental anomalies)	72	2	0	1	1	0	0	0	0	0	mmu-miR-30b-5p	-0.3	-0.3	0.88	2005, 2007, 2009, 2011
FXR1	ENST00000357559.4	fragile X mental retardation, autosomal homolog 1	434	1	0	0	1	1	0	0	1	1	mmu-miR-30e-5p	-0.29	-0.46	0.78	2005, 2007, 2009, 2011
MFSD11	ENST00000336509.4	major facilitator superfamily domain containing 11	142	1	0	0	1	0	0	0	0	0	mmu-miR-30b-5p	-0.29	-0.31	0.78	2007, 2009, 2011
YWHAZ	ENST00000395957.2	tyrosine 3-monooxygenase/tryptophan 5-monooxygenase activation protein, zeta polypeptide	184	1	0	1	0	0	0	0	0	0	mmu-miR-384-5p	-0.29	-0.29	0.71	2007, 2009, 2011
MAL	ENST00000309988.4	mal, T-cell differentiation protein	5	1	0	1	0	0	0	0	0	0	mmu-miR-30b-5p	-0.29	-0.29	0.63	2011
ZBTB11	ENST00000312938.4	zinc finger and BTB domain containing 11	179	1	0	0	1	1	1	0	0	1	mmu-miR-30a-5p	-0.29	-0.29	0.78	2011
ARF4	ENST00000303436.6	ADP-ribosylation factor 4	390	1	0	1	0	0	0	0	0	0	mmu-miR-384-5p	-0.29	-0.34	0.55	2007
CHD9	ENST00000566029.1	chromodomain helicase DNA binding protein 9	447	1	0	0	1	0	0	0	0	2	mmu-miR-384-5p	-0.29	-0.36	0.78	2005, 2007, 2011
USP2	ENST00000455332.2	ubiquitin specific peptidase 2	19	1	0	1	0	0	0	0	0	1	mmu-miR-30b-5p	-0.29	-0.29	0.7	2011
PRRG1	ENST00000378628.4	proline rich Gla (G-carboxyglutamic acid) 1	1122	1	0	0	1	0	0	0	0	0	mmu-miR-30e-5p	-0.28	-0.29	0.78	2009, 2011
PPA1	ENST00000373232.3	pyrophosphatase (inorganic) 1	34	1	0	1	0	0	0	0	0	0	mmu-miR-30b-5p	-0.28	-0.33	0.43
VAPA	ENST00000400000.2	VAMP (vesicle-associated membrane protein)-associated protein A, 33kDa	2926	1	0	1	0	0	0	0	0	0	mmu-miR-30a-5p	-0.28	-0.28	0.71	2005, 2007, 2009, 2011
PNN	ENST00000216832.4	pinin, desmosome associated protein	858	1	0	1	0	1	0	0	1	0	mmu-miR-30b-5p	-0.28	-0.38	0.65	2005, 2007, 2009, 2011
ZBTB39	ENST00000300101.2	zinc finger and BTB domain containing 39	7	2	0	2	0	0	0	0	0	1	mmu-miR-384-5p	-0.28	-0.28	0.87	2007, 2009, 2011
PPP1R14C	ENST00000361131.4	protein phosphatase 1, regulatory (inhibitor) subunit 14C	173	1	0	1	0	0	0	0	0	0	mmu-miR-30b-5p	-0.28	-0.31	0.6	2005, 2007, 2009, 2011
CTPS1	ENST00000372621.4	CTP synthase 1	3982	1	0	0	1	0	0	0	0	0	mmu-miR-30a-5p	-0.28	-0.28	0.78
FOXN2	ENST00000340553.3	forkhead box N2	441	1	0	0	1	0	0	0	0	1	mmu-miR-30b-5p	-0.28	-0.28	0.78	2007
FAM13C	ENST00000373867.3	family with sequence similarity 13, member C	343	1	0	0	1	0	0	0	0	0	mmu-miR-384-5p	-0.28	-0.28	0.78	2005, 2007, 2009, 2011
SLC6A6	ENST00000454876.2	solute carrier family 6 (neurotransmitter transporter), member 6	280	2	0	1	1	0	0	0	0	0	mmu-miR-384-5p	-0.28	-0.28	0.94	2005, 2007, 2009, 2011
GABRA5	ENST00000335625.5	gamma-aminobutyric acid (GABA) A receptor, alpha 5	5	1	0	0	1	0	0	0	0	0	mmu-miR-30e-5p	-0.28	-0.28	0.78	2005, 2007, 2011
RWDD4	ENST00000326397.5	RWD domain containing 4	5	1	0	1	0	0	0	0	0	0	mmu-miR-30e-5p	-0.27	-0.27	0.45	2011
NFIB	ENST00000397575.3	nuclear factor I/B	1149	2	0	2	0	0	0	0	0	0	mmu-miR-30a-5p	-0.27	-0.29	0.91	2005, 2007, 2009, 2011
SRSF10	ENST00000343255.5	serine/arginine-rich splicing factor 10	1920	1	0	0	1	1	0	1	0	0	mmu-miR-384-5p	-0.27	-0.32	0.78
PGGT1B	ENST00000419445.1	protein geranylgeranyltransferase type I, beta subunit	25	1	0	0	1	0	0	0	0	0	mmu-miR-30e-5p	-0.27	-0.3	0.78	2005, 2007, 2009, 2011
GRB10	ENST00000398812.2	growth factor receptor-bound protein 10	1382	1	0	1	0	1	0	0	1	0	mmu-miR-30e-5p	-0.27	-0.28	0.74	2005, 2007, 2009, 2011
BTBD10	ENST00000278174.5	BTB (POZ) domain containing 10	5	1	0	1	0	0	0	0	0	1	mmu-miR-30b-5p	-0.27	-0.27	0.65	2007, 2009, 2011
PLEKHO2	ENST00000323544.4	pleckstrin homology domain containing, family O member 2	279	2	0	1	1	0	0	0	0	0	mmu-miR-30b-5p	-0.26	-0.26	0.94	2009, 2011
PSMD7	ENST00000219313.4	proteasome (prosome, macropain) 26S subunit, non-ATPase, 7	826	1	0	1	0	0	0	0	0	0	mmu-miR-30b-5p	-0.26	-0.32	0.64	2005, 2007, 2009, 2011
TBPL1	ENST00000237264.4	TBP-like 1	69	1	0	0	1	0	0	0	0	0	mmu-miR-384-5p	-0.26	-0.26	0.78	2005, 2007, 2009, 2011
ARL6IP5	ENST00000273258.3	ADP-ribosylation-like factor 6 interacting protein 5	150	1	0	1	0	1*	0	0	0	0	mmu-miR-30a-5p	-0.26	-0.28	0.7	2009
NEUROD6	ENST00000297142.3	neuronal differentiation 6	5	1	0	1	0	0	0	0	0	0	mmu-miR-384-5p	-0.26	-0.26	0.62	2005, 2007
KCNA4	ENST00000328224.6	potassium voltage-gated channel, shaker-related subfamily, member 4	5	1	0	1	0	0	0	0	0	0	mmu-miR-384-5p	-0.26	-0.26	0.67	2011
HTRA3	ENST00000307358.2	HtrA serine peptidase 3	5161	1	0	0	1	0	0	0	0	0	mmu-miR-30b-5p	-0.26	-0.26	0.78	2007, 2009, 2011
SLC5A11	ENST00000347898.3	solute carrier family 5 (sodium/inositol cotransporter), member 11	5	1	0	1	0	0	0	0	0	0	mmu-miR-30b-5p	-0.26	-0.26	0.43	2005, 2007, 2009, 2011
SCAF4	ENST00000286835.7	SR-related CTD-associated factor 4	506	1	0	0	1	0	0	0	0	0	mmu-miR-384-5p	-0.25	-0.26	0.78	2011
SPHKAP	ENST00000392056.3	SPHK1 interactor, AKAP domain containing	5	1	0	1	0	0	0	0	0	0	mmu-miR-30a-5p	-0.25	-0.25	0.7	2005, 2007, 2009, 2011
ADAMTS3	ENST00000286657.4	ADAM metallopeptidase with thrombospondin type 1 motif, 3	5	1	0	1	0	1	0	1	0	2	mmu-miR-30e-5p	-0.25	-0.25	0.69	2005, 2007, 2009, 2011
GPCPD1	ENST00000379019.4	glycerophosphocholine phosphodiesterase GDE1 homolog (S. cerevisiae)	155	1	0	1	0	0	0	0	0	0	mmu-miR-30b-5p	-0.25	-0.25	0.65	2009, 2011
NKAIN2	ENST00000368417.1	Na+/K+ transporting ATPase interacting 2	34	1	0	1	0	0	0	0	0	0	mmu-miR-384-5p	-0.25	-0.25	0.67	2005, 2007, 2009, 2011
NRBP1	ENST00000233557.3	nuclear receptor binding protein 1	455	1	0	1	0	0	0	0	0	0	mmu-miR-384-5p	-0.25	-0.25	0.58
ACTN1	ENST00000193403.6	actinin, alpha 1	10087	1	0	0	1	0	0	0	0	0	mmu-miR-30b-5p	-0.25	-0.25	0.78	2005, 2007, 2009, 2011
SBK1	ENST00000341901.4	SH3 domain binding kinase 1	9	2	0	1	1	0	0	0	0	0	mmu-miR-384-5p	-0.25	-0.25	0.94	2007, 2009, 2011
RIMS1	ENST00000348717.5	regulating synaptic membrane exocytosis 1	45	1	0	0	1	1	0	0	1	0	mmu-miR-30d-5p	-0.25	-0.25	0.78	2007, 2011
CCZ1B	ENST00000316731.8	CCZ1 vacuolar protein trafficking and biogenesis associated homolog B (S. cerevisiae)	5	1	0	1	0	0	0	0	0	0	mmu-miR-30e-5p	-0.25	-0.25	0.66
FGF20	ENST00000180166.5	fibroblast growth factor 20	5	1	0	1	0	0	0	0	0	0	mmu-miR-30a-5p	-0.25	-0.25	0.4
MAF	ENST00000393350.1	v-maf avian musculoaponeurotic fibrosarcoma oncogene homolog	608	1	0	1	0	1	1	0	0	0	mmu-miR-384-5p	-0.25	-0.25	0.68	2009, 2011
SIX1	ENST00000247182.6	SIX homeobox 1	1264	2	0	1	1	0	0	0	0	0	mmu-miR-30e-5p	-0.25	-0.37	0.89	2011
NRBF2	ENST00000277746.6	nuclear receptor binding factor 2	11	1	0	0	1	0	0	0	0	0	mmu-miR-30a-5p	-0.25	-0.25	0.78	2005, 2007, 2009, 2011
TMED2	ENST00000262225.3	transmembrane emp24 domain trafficking protein 2	3025	1	0	1	0	0	0	0	0	0	mmu-miR-30b-5p	-0.25	-0.25	0.67	2007
SURF4	ENST00000545297.1	surfeit 4	3667	1	0	0	1	1	0	1	0	0	mmu-miR-384-5p	-0.25	-0.26	0.78	2009, 2011
FIGN	ENST00000333129.3	fidgetin	10	2	0	2	0	0	0	0	0	0	mmu-miR-30b-5p	-0.24	-0.32	0.9	2009, 2011
TMEM229A	ENST00000455783.1	transmembrane protein 229A	5	1	0	1	0	1	0	1	0	0	mmu-miR-384-5p	-0.24	-0.24	0.51	2011
SKIL	ENST00000458537.3	SKI-like oncogene	210	1	0	0	1	0	0	0	0	0	mmu-miR-30a-5p	-0.24	-0.36	0.78
SOCS6	ENST00000397942.3	suppressor of cytokine signaling 6	140	2	0	0	2	0	0	0	0	0	mmu-miR-384-5p	-0.24	-0.31	0.95	2005, 2007, 2009, 2011
NIPAL1	ENST00000295461.5	NIPA-like domain containing 1	137	1	0	1	0	0	0	0	0	0	mmu-miR-30e-5p	-0.24	-0.24	0.68
PI4K2B	ENST00000264864.6	phosphatidylinositol 4-kinase type 2 beta	931	1	0	0	1	0	0	0	0	1	mmu-miR-30e-5p	-0.24	-0.25	0.78	2009, 2011
NFIA	ENST00000403491.3	nuclear factor I/A	5	1	0	1	0	1	0	1	0	2	mmu-miR-384-5p	-0.24	-0.24	0.7	2011
KCTD3	ENST00000259154.4	potassium channel tetramerization domain containing 3	372	1	0	1	0	1	0	0	1	1	mmu-miR-30b-5p	-0.24	-0.52	0.7	2005, 2007, 2009, 2011
SETD3	ENST00000331768.5	SET domain containing 3	58	1	0	1	0	0	0	0	0	0	mmu-miR-30e-5p	-0.24	-0.27	0.71	2007, 2009
SIRT1	ENST00000212015.6	sirtuin 1	220	1	0	1	0	0	0	0	0	0	mmu-miR-30e-5p	-0.24	-0.24	0.66	2005, 2007, 2009, 2011
AC012215.1	ENST00000437887.1	Uncharacterized protein	31	1	0	0	1	0	0	0	0	0	mmu-miR-30a-5p	-0.24	-0.24	0.78
RANBP9	ENST00000011619.3	RAN binding protein 9	885	1	0	0	1	0	0	0	0	0	mmu-miR-384-5p	-0.24	-0.24	0.78	2005, 2007, 2011
TUSC3	ENST00000503731.1	tumor suppressor candidate 3	3615	1	0	1	0	0	0	0	0	0	mmu-miR-30b-5p	-0.24	-0.24	0.67	2009, 2011
SSBP2	ENST00000320672.4	single-stranded DNA binding protein 2	1996	1	0	0	1	0	0	0	0	0	mmu-miR-384-5p	-0.24	-0.24	0.78	2005, 2007, 2009, 2011
SNX27	ENST00000368843.3	sorting nexin family member 27	46	1	0	0	1	0	0	0	0	0	mmu-miR-30a-5p	-0.24	-0.24	0.78	2005, 2007, 2009, 2011
DIP2B	ENST00000301180.5	DIP2 disco-interacting protein 2 homolog B (Drosophila)	1613	1	0	1	0	1	0	0	1	0	mmu-miR-30b-5p	-0.24	-0.24	0.65	2007, 2009, 2011
EYA2	ENST00000327619.5	eyes absent homolog 2 (Drosophila)	15	1	0	0	1	0	0	0	0	0	mmu-miR-384-5p	-0.23	-0.23	0.78	2005, 2007, 2009, 2011
JAK1	ENST00000342505.4	Janus kinase 1	139	1	0	1	0	1	0	1	0	0	mmu-miR-384-5p	-0.23	-0.23	0.69	2009, 2011
SMIM14	ENST00000295958.5	small integral membrane protein 14	601	1	0	1	0	0	0	0	0	0	mmu-miR-30a-5p	-0.23	-0.27	0.65	2007
HMGB3	ENST00000325307.7	high mobility group box 3	295	1	0	0	1	1	0	0	1	0	mmu-miR-30b-5p	-0.23	-0.26	0.78	2005, 2007, 2009, 2011
ASB4	ENST00000325885.5	ankyrin repeat and SOCS box containing 4	5	1	0	0	1	0	0	0	0	1	mmu-miR-30a-5p	-0.23	-0.23	0.78	2011
CCNF	ENST00000397066.4	cyclin F	1432	1	0	1	0	0	0	0	0	0	mmu-miR-384-5p	-0.23	-0.23	0.45	2009, 2011
PCGF3	ENST00000362003.5	polycomb group ring finger 3	503	2	0	0	2	0	0	0	0	0	mmu-miR-384-5p	-0.23	-0.56	0.95	2005, 2007, 2009, 2011
GTF2H1	ENST00000265963.4	general transcription factor IIH, polypeptide 1, 62kDa	121	1	0	1	0	0	0	0	0	0	mmu-miR-30e-5p	-0.23	-0.23	0.68	2005, 2007, 2009, 2011
PCGF5	ENST00000336126.5	polycomb group ring finger 5	176	1	0	1	0	1	0	1	0	1	mmu-miR-384-5p	-0.23	-0.41	0.71	2005, 2007, 2009, 2011
TTC39A	ENST00000530004.1	tetratricopeptide repeat domain 39A	174	1	0	0	1	0	0	0	0	0	mmu-miR-30b-5p	-0.23	-0.37	0.78	2007, 2009, 2011
C16orf87	ENST00000394806.2	chromosome 16 open reading frame 87	95	1	0	1	0	0	0	0	0	0	mmu-miR-30b-5p	-0.23	-0.26	0.71	2007
PSEN2	ENST00000340188.4	presenilin 2 (Alzheimer disease 4)	613	1	0	1	0	0	0	0	0	0	mmu-miR-30b-5p	-0.23	-0.23	0.63	2005, 2007
ADAM22	ENST00000398204.4	ADAM metallopeptidase domain 22	115	1	0	1	0	0	0	0	0	0	mmu-miR-30a-5p	-0.23	-0.23	0.68	2009, 2011
PAX3	ENST00000350526.4	paired box 3	7	1	0	0	1	1	1	0	0	0	mmu-miR-384-5p	-0.23	-0.23	0.78	2005, 2007, 2011
AP3M1	ENST00000355264.4	adaptor-related protein complex 3, mu 1 subunit	601	1	0	0	1	0	0	0	0	1	mmu-miR-30e-5p	-0.22	-0.23	0.78	2005, 2007, 2009, 2011
ELAVL4	ENST00000371824.1	ELAV like neuron-specific RNA binding protein 4	5	1	0	1	0	0	0	0	0	0	mmu-miR-384-5p	-0.22	-0.22	0.69
TEX2	ENST00000258991.3	testis expressed 2	127	1	0	0	1	0	0	0	0	0	mmu-miR-30b-5p	-0.22	-0.23	0.78
MAP3K5	ENST00000359015.4	mitogen-activated protein kinase kinase kinase 5	46	1	0	1	0	0	0	0	0	0	mmu-miR-30a-5p	-0.22	-0.22	0.69	2005, 2007, 2009, 2011
JARID2	ENST00000341776.2	jumonji, AT rich interactive domain 2	199	1	0	1	0	0	0	0	0	0	mmu-miR-30a-5p	-0.22	-0.24	0.7	2009, 2011
SLC6A15	ENST00000309283.7	solute carrier family 6 (neutral amino acid transporter), member 15	508	1	0	0	1	0	0	0	0	0	mmu-miR-30e-5p	-0.22	-0.22	0.78	2011
FRZB	ENST00000295113.4	frizzled-related protein	43	1	0	1	0	1	0	1	0	0	mmu-miR-30b-5p	-0.22	-0.41	0.7	2009, 2011
MAB21L1	ENST00000379919.4	mab-21-like 1 (C. elegans)	25	1	0	0	1	0	0	0	0	0	mmu-miR-30e-5p	-0.22	-0.22	0.78	2005, 2007, 2009, 2011
NOVA1	ENST00000465357.2	neuro-oncological ventral antigen 1	5	1	0	0	1	0	0	0	0	1	mmu-miR-30b-5p	-0.22	-0.22	0.78	2005, 2007, 2009, 2011
TET1	ENST00000373644.4	tet methylcytosine dioxygenase 1	5	1	0	1	0	1	0	1	0	0	mmu-miR-30d-5p	-0.21	-0.21	0.71	2009, 2011
UBE2G1	ENST00000396981.2	ubiquitin-conjugating enzyme E2G 1	5620	1	0	1	0	0	0	0	0	0	mmu-miR-30b-5p	-0.21	-0.26	0.61	2009, 2011
PLS1	ENST00000457734.2	plastin 1	467	1	0	0	1	0	0	0	0	0	mmu-miR-30a-5p	-0.21	-0.21	0.78	2005, 2007, 2009, 2011
PELI1	ENST00000358912.4	pellino E3 ubiquitin protein ligase 1	134	1	0	0	1	0	0	0	0	0	mmu-miR-384-5p	-0.21	-0.21	0.78	2005, 2007, 2009, 2011
KIAA1211L	ENST00000397899.2	KIAA1211-like	7	1	0	1	0	0	0	0	0	0	mmu-miR-30a-5p	-0.21	-0.21	0.43	2005, 2007, 2009, 2011
ZEB2	ENST00000558170.2	zinc finger E-box binding homeobox 2	33	1	0	0	1	1	0	0	1	0	mmu-miR-30b-5p	-0.21	-0.22	0.78	2007, 2009, 2011
TUBGCP3	ENST00000261965.3	tubulin, gamma complex associated protein 3	22	1	0	0	1	0	0	0	0	0	mmu-miR-384-5p	-0.21	-0.21	0.78	2005, 2007, 2009, 2011
CA10	ENST00000570565.1	carbonic anhydrase X	5	1	0	1	0	0	0	0	0	0	mmu-miR-30a-5p	-0.21	-0.21	0.43	2005, 2007, 2011
EPB41L5	ENST00000443902.2	erythrocyte membrane protein band 4.1 like 5	108	1	0	1	0	1	0	0	1	0	mmu-miR-30e-5p	-0.21	-0.22	0.71	2009, 2011
ELMO1	ENST00000341056.3	engulfment and cell motility 1	118	1	0	0	1	0	0	0	0	0	mmu-miR-30e-5p	-0.21	-0.21	0.78	2005, 2007, 2009, 2011
MARCKS	ENST00000368635.4	myristoylated alanine-rich protein kinase C substrate	188	1	0	0	1	0	0	0	0	1	mmu-miR-30b-5p	-0.21	-0.25	0.78	2011
KLHL23	ENST00000392647.2	kelch-like family member 23	791	1	0	0	1	0	0	0	0	0	mmu-miR-30e-5p	-0.21	-0.21	0.78
DDX46	ENST00000452510.2	DEAD (Asp-Glu-Ala-Asp) box polypeptide 46	472	1	0	0	1	1	0	0	1	0	mmu-miR-30b-5p	-0.21	-0.28	0.78	2005, 2007, 2009, 2011
COTL1	ENST00000262428.4	coactosin-like 1 (Dictyostelium)	6558	1	0	0	1	0	0	0	0	0	mmu-miR-30a-5p	-0.21	-0.21	0.78	2005, 2007, 2011
CTDSPL2	ENST00000260327.4	CTD (carboxy-terminal domain, RNA polymerase II, polypeptide A) small phosphatase like 2	457	1	0	1	0	1	0	0	1	0	mmu-miR-30b-5p	-0.21	-0.25	0.71	2007, 2009, 2011
NLGN1	ENST00000457714.1	neuroligin 1	36	1	0	1	0	2	0	2	0	1	mmu-miR-30e-5p	-0.21	-0.22	0.61	2005, 2007
KRAS	ENST00000256078.4	Kirsten rat sarcoma viral oncogene homolog	40	1	0	1	0	1	0	0	1	0	mmu-miR-30b-5p	-0.2	-0.41	0.79	2005, 2007, 2009, 2011
JUNB	ENST00000302754.4	jun B proto-oncogene	1055	1	0	0	1	0	0	0	0	0	mmu-miR-30a-5p	-0.2	-0.2	0.78	2005, 2007, 2011
NR2F2	ENST00000394166.3	nuclear receptor subfamily 2, group F, member 2	4428	2	0	1	1	0	0	0	0	0	mmu-miR-30e-5p	-0.2	-0.32	0.87	2005, 2007, 2009, 2011
ZNF711	ENST00000360700.4	zinc finger protein 711	5614	1	0	0	1	0	0	0	0	0	mmu-miR-30b-5p	-0.2	-0.2	0.78	2007, 2009, 2011
FGD6	ENST00000343958.4	FYVE, RhoGEF and PH domain containing 6	21	1	0	1	0	0	0	0	0	0	mmu-miR-30b-5p	-0.2	-0.24	0.71	2005, 2007, 2009, 2011
LONRF1	ENST00000398246.3	LON peptidase N-terminal domain and ring finger 1	36	1	0	0	1	1	1	0	0	0	mmu-miR-30b-5p	-0.2	-0.2	0.78	2007
POU3F2	ENST00000328345.5	POU class 3 homeobox 2	274	1	0	0	1	1	0	0	1	0	mmu-miR-30b-5p	-0.2	-0.3	0.78
SNX30	ENST00000374232.3	sorting nexin family member 30	33	1	0	1	0	0	0	0	0	0	mmu-miR-30b-5p	-0.2	-0.23	0.71	2009, 2011
COPS7B	ENST00000373608.3	COP9 signalosome subunit 7B	331	1	0	1	0	0	0	0	0	1	mmu-miR-30b-5p	-0.2	-0.2	0.71	2005, 2007, 2009, 2011
FOXA1	ENST00000250448.2	forkhead box A1	249	1	0	0	1	1	0	1	0	1	mmu-miR-384-5p	-0.2	-0.3	0.78	2005, 2007, 2011
MEIS2	ENST00000397624.3	Meis homeobox 2	63	1	0	1	0	0	0	0	0	1	mmu-miR-384-5p	-0.19	-0.2	0.69	2005, 2007, 2009, 2011
ZNF521	ENST00000361524.3	zinc finger protein 521	520	1	0	1	0	0	0	0	0	1	mmu-miR-30e-5p	-0.19	-0.2	0.7	2009, 2011
UBE2D2	ENST00000398733.3	ubiquitin-conjugating enzyme E2D 2	11458	1	0	1	0	1	0	0	1	0	mmu-miR-30b-5p	-0.19	-0.36	0.67	2005, 2007, 2009, 2011
KLF11	ENST00000305883.1	Kruppel-like factor 11	42	1	0	0	1	0	0	0	0	0	mmu-miR-30e-5p	-0.19	-0.22	0.78	2005, 2007, 2009, 2011
MICU3	ENST00000318063.5	mitochondrial calcium uptake family, member 3	9	1	0	0	1	0	0	0	0	0	mmu-miR-384-5p	-0.19	-0.19	0.78	2009, 2011
RFX2	ENST00000303657.5	regulatory factor X, 2 (influences HLA class II expression)	148	1	0	1	0	0	0	0	0	0	mmu-miR-30a-5p	-0.19	-0.19	0.7	2009, 2011
YWHAG	ENST00000307630.3	tyrosine 3-monooxygenase/tryptophan 5-monooxygenase activation protein, gamma polypeptide	5623	1	0	0	1	0	0	0	0	0	mmu-miR-30e-5p	-0.19	-0.19	0.78	2005, 2007
ATL2	ENST00000406122.1	atlastin GTPase 2	1135	1	0	0	1	0	0	0	0	0	mmu-miR-30e-5p	-0.19	-0.2	0.78	2011
SNX29	ENST00000566228.1	sorting nexin 29	266	1	0	0	1	0	0	0	0	0	mmu-miR-30b-5p	-0.19	-0.23	0.78	2009
TNPO1	ENST00000337273.5	transportin 1	2041	1	0	1	0	1	0	0	1	0	mmu-miR-30e-5p	-0.19	-0.21	0.93	2007, 2009, 2011
GNAQ	ENST00000286548.4	guanine nucleotide binding protein (G protein), q polypeptide	47	1	0	0	1	1	0	1	0	1	mmu-miR-30b-5p	-0.19	-0.19	0.79
CLCF1	ENST00000312438.7	cardiotrophin-like cytokine factor 1	98	1	0	0	1	0	0	0	0	0	mmu-miR-30a-5p	-0.19	-0.19	0.78	2005, 2007, 2009, 2011
ITPK1	ENST00000267615.6	inositol-tetrakisphosphate 1-kinase	60	2	0	0	2	0	0	0	0	0	mmu-miR-30a-5p	-0.19	-0.24	0.95	2005, 2007, 2009, 2011
GPR137C	ENST00000321662.6	G protein-coupled receptor 137C	110	1	0	0	1	0	0	0	0	0	mmu-miR-30e-5p	-0.19	-0.2	0.78
TMEM245	ENST00000374586.3	transmembrane protein 245	1320	1	0	0	1	1	0	0	1	0	mmu-miR-30e-5p	-0.19	-0.21	0.78	2005, 2007
PHLDB2	ENST00000431670.2	pleckstrin homology-like domain, family B, member 2	588	1	0	0	1	0	0	0	0	1	mmu-miR-30b-5p	-0.19	-0.19	0.78	2011
RANBP10	ENST00000317506.3	RAN binding protein 10	140	1	0	1	0	1	0	0	1	0	mmu-miR-30e-5p	-0.19	-0.2	0.7	2005, 2007, 2009, 2011
GRHL2	ENST00000251808.3	grainyhead-like 2 (Drosophila)	5	1	0	1	0	1	0	0	1	0	mmu-miR-30b-5p	-0.19	-0.19	0.93	2007, 2009, 2011
PIEZO2	ENST00000302079.6	piezo-type mechanosensitive ion channel component 2	158	1	0	0	1	0	0	0	0	0	mmu-miR-30e-5p	-0.19	-0.19	0.78	2011
MTA1	ENST00000331320.7	metastasis associated 1	8	1	0	1	0	0	0	0	0	0	mmu-miR-384-5p	-0.19	-0.19	0.65	2009
ARID3A	ENST00000263620.3	AT rich interactive domain 3A (BRIGHT-like)	320	2	0	1	1	0	0	0	0	0	mmu-miR-30e-5p	-0.19	-0.28	0.94	2007, 2009, 2011
TPM4	ENST00000300933.4	tropomyosin 4	332	1	0	0	1	0	0	0	0	0	mmu-miR-30e-5p	-0.19	-0.21	0.78	2011
N4BP2	ENST00000261435.6	NEDD4 binding protein 2	16	1	0	0	1	1	0	0	1	0	mmu-miR-30b-5p	-0.19	-0.19	0.78	2011
SON	ENST00000290239.6	SON DNA binding protein	161	1	0	1	0	0	0	0	0	0	mmu-miR-30b-5p	-0.19	-0.19	0.65	2005, 2007, 2011
SPCS3	ENST00000503362.1	signal peptidase complex subunit 3 homolog (S. cerevisiae)	1645	1	0	1	0	4	0	2	2	0	mmu-miR-384-5p	-0.19	-0.58	0.93	2011
NR3C1	ENST00000394464.2	nuclear receptor subfamily 3, group C, member 1 (glucocorticoid receptor)	682	1	0	0	1	0	0	0	0	0	mmu-miR-384-5p	-0.19	-0.2	0.78	2005, 2007, 2009, 2011
WASL	ENST00000223023.4	Wiskott-Aldrich syndrome-like	230	1	0	0	1	0	0	0	0	0	mmu-miR-30b-5p	-0.19	-0.19	0.78
P4HA1	ENST00000307116.2	prolyl 4-hydroxylase, alpha polypeptide I	38	1	0	0	1	0	0	0	0	0	mmu-miR-30a-5p	-0.18	-0.18	0.78	2005, 2007, 2009, 2011
HOXB4	ENST00000332503.5	homeobox B4	214	1	0	1	0	0	0	0	0	0	mmu-miR-30b-5p	-0.18	-0.18	0.71	2009, 2011
TRIM24	ENST00000343526.4	tripartite motif containing 24	182	1	0	1	0	1	1	0	0	0	mmu-miR-30b-5p	-0.18	-0.21	0.67
ORC2	ENST00000234296.2	origin recognition complex, subunit 2	381	1	0	0	1	0	0	0	0	0	mmu-miR-30a-5p	-0.18	-0.19	0.78	2005, 2007, 2009
GRM5	ENST00000418177.2	glutamate receptor, metabotropic 5	5	1	0	1	0	1	0	1	0	0	mmu-miR-30a-5p	-0.18	-0.18	0.71	2005, 2007, 2009, 2011
RP6-24A23.6	ENST00000563887.1	Uncharacterized protein	937	1	0	0	1	0	0	0	0	0	mmu-miR-30e-5p	-0.18	-0.26	0.78
HOXB3	ENST00000470495.1	homeobox B3	70	1	0	0	1	0	0	0	0	0	mmu-miR-30b-5p	-0.18	-0.18	0.78	2009, 2011
PPP3CB	ENST00000360663.5	protein phosphatase 3, catalytic subunit, beta isozyme	105	1	0	0	1	0	0	0	0	0	mmu-miR-30e-5p	-0.18	-0.18	0.78	2005, 2007, 2009, 2011
BCL6	ENST00000406870.2	B-cell CLL/lymphoma 6	20	1	0	0	1	0	0	0	0	0	mmu-miR-30b-5p	-0.18	-0.18	0.78	2005, 2007, 2009, 2011
OCLN	ENST00000355237.2	occludin	5	1	0	0	1	0	0	0	0	0	mmu-miR-30b-5p	-0.18	-0.18	0.78	2011
TRIM9	ENST00000298355.3	tripartite motif containing 9	45	1	0	0	1	0	0	0	0	0	mmu-miR-30b-5p	-0.18	-0.18	0.78	2005, 2007, 2009, 2011
RCC2	ENST00000375436.4	regulator of chromosome condensation 2	180	1	0	1	0	0	0	0	0	0	mmu-miR-30e-5p	-0.18	-0.18	0.7	2011
EFR3A	ENST00000254624.5	EFR3 homolog A (S. cerevisiae)	372	1	0	0	1	1	0	1	0	0	mmu-miR-30b-5p	-0.18	-0.18	0.78	2005, 2007, 2009, 2011
PLCG1	ENST00000244007.3	phospholipase C, gamma 1	69	1	0	0	1	0	0	0	0	0	mmu-miR-30a-5p	-0.18	-0.18	0.78	2005, 2007, 2009, 2011
CPEB3	ENST00000412050.4	cytoplasmic polyadenylation element binding protein 3	48	2	0	1	1	0	0	0	0	0	mmu-miR-384-5p	-0.18	-0.18	0.93	2005, 2007, 2009, 2011
GOLGA1	ENST00000373555.4	golgin A1	334	1	0	0	1	0	0	0	0	0	mmu-miR-30b-5p	-0.18	-0.18	0.78	2005, 2007, 2009, 2011
KLF13	ENST00000307145.3	Kruppel-like factor 13	5	1	0	0	1	0	0	0	0	0	mmu-miR-384-5p	-0.18	-0.18	0.78	2005, 2007, 2009, 2011
TRIM23	ENST00000231524.9	tripartite motif containing 23	247	1	0	0	1	0	0	0	0	0	mmu-miR-384-5p	-0.18	-0.18	0.78	2011
RNF44	ENST00000274811.4	ring finger protein 44	1623	1	0	1	0	0	0	0	0	0	mmu-miR-30b-5p	-0.18	-0.18	0.71	2005, 2007, 2009, 2011
COG3	ENST00000349995.5	component of oligomeric golgi complex 3	53	1	0	1	0	0	0	0	0	0	mmu-miR-30a-5p	-0.18	-0.18	0.62	2009, 2011
NEGR1	ENST00000357731.5	neuronal growth regulator 1	28	1	0	0	1	1	0	1	0	0	mmu-miR-30b-5p	-0.18	-0.19	0.78	2005, 2007, 2009, 2011
ABL2	ENST00000502732.1	c-abl oncogene 2, non-receptor tyrosine kinase	892	1	0	0	1	1	0	1	0	1	mmu-miR-30b-5p	-0.18	-0.18	0.84	2009, 2011
KCNJ3	ENST00000295101.2	potassium inwardly-rectifying channel, subfamily J, member 3	21	1	0	1	0	0	0	0	0	0	mmu-miR-30b-5p	-0.17	-0.17	0.67	2005, 2007, 2009, 2011
EPG5	ENST00000282041.5	ectopic P-granules autophagy protein 5 homolog (C. elegans)	269	1	0	0	1	0	0	0	0	0	mmu-miR-30d-5p	-0.17	-0.17	0.78	2007, 2009, 2011
KCTD8	ENST00000360029.3	potassium channel tetramerization domain containing 8	5	1	0	1	0	0	0	0	0	0	mmu-miR-30e-5p	-0.17	-0.17	0.4	2005, 2007
PTBP3	ENST00000374257.1	polypyrimidine tract binding protein 3	214	1	0	0	1	0	0	0	0	0	mmu-miR-30e-5p	-0.17	-0.19	0.78	2005, 2007, 2009, 2011
PAFAH1B2	ENST00000527958.1	platelet-activating factor acetylhydrolase 1b, catalytic subunit 2 (30kDa)	180	2	0	2	0	0	0	0	0	0	mmu-miR-384-5p	-0.17	-0.48	0.83	2011
FAM53B	ENST00000337318.3	family with sequence similarity 53, member B	27	1	0	0	1	0	0	0	0	1	mmu-miR-384-5p	-0.17	-0.17	0.78	2011
ACSBG1	ENST00000258873.4	acyl-CoA synthetase bubblegum family member 1	5	1	0	0	1	0	0	0	0	1	mmu-miR-30a-5p	-0.17	-0.17	0.78
POU4F2	ENST00000281321.3	POU class 4 homeobox 2	5	1	0	1	0	0	0	0	0	0	mmu-miR-30a-5p	-0.17	-0.17	0.68	2005, 2007, 2011
GCNT2	ENST00000316170.3	glucosaminyl (N-acetyl) transferase 2, I-branching enzyme (I blood group)	651	1	0	0	1	0	0	0	0	1	mmu-miR-30a-5p	-0.17	-0.17	0.78	2005, 2007, 2009, 2011
SGMS2	ENST00000394684.4	sphingomyelin synthase 2	111	1	0	1	0	1	0	0	1	2	mmu-miR-384-5p	-0.17	-0.23	0.79	2011
IRS2	ENST00000375856.3	insulin receptor substrate 2	231	1	0	0	1	0	0	0	0	2	mmu-miR-384-5p	-0.17	-0.17	0.78	2005, 2007, 2009, 2011
C10orf118	ENST00000543782.1	chromosome 10 open reading frame 118	146	1	0	1	0	1	1	0	0	1	mmu-miR-30b-5p	-0.17	-0.2	0.56
GOLGA4	ENST00000361924.2	golgin A4	7	1	0	1	0	0	0	0	0	0	mmu-miR-30a-5p	-0.17	-0.17	0.64	2005, 2007, 2009, 2011
CUL9	ENST00000252050.4	cullin 9	127	1	0	1	0	0	0	0	0	0	mmu-miR-30b-5p	-0.17	-0.17	0.44	2009, 2011
MMP19	ENST00000409200.3	matrix metallopeptidase 19	135	1	0	1	0	0	0	0	0	0	mmu-miR-30e-5p	-0.17	-0.17	ORF
STX16	ENST00000355957.5	syntaxin 16	756	1	0	0	1	1	0	1	0	0	mmu-miR-30b-5p	-0.17	-0.17	0.78	2011
CNTN4	ENST00000427331.1	contactin 4	191	1	0	0	1	0	0	0	0	0	mmu-miR-30e-5p	-0.17	-0.17	0.78	2005, 2007, 2009, 2011
KIAA1033	ENST00000332180.5	KIAA1033	238	1	0	0	1	0	0	0	0	0	mmu-miR-384-5p	-0.17	-0.17	0.78	2005, 2007, 2009, 2011
PRUNE2	ENST00000376718.3	prune homolog 2 (Drosophila)	121	1	0	1	0	0	0	0	0	0	mmu-miR-30a-5p	-0.17	-0.17	0.7	2009, 2011
WNT7B	ENST00000339464.4	wingless-type MMTV integration site family, member 7B	40	1	0	0	1	0	0	0	0	0	mmu-miR-384-5p	-0.16	-0.16	0.78	2011
ZIC2	ENST00000376335.3	Zic family member 2	1173	1	0	0	1	0	0	0	0	0	mmu-miR-30b-5p	-0.16	-0.16	0.78	2007
FOXP4	ENST00000373063.3	forkhead box P4	228	1	0	0	1	0	0	0	0	0	mmu-miR-30b-5p	-0.16	-0.19	0.78	2005, 2007, 2009, 2011
GMEB1	ENST00000373816.1	glucocorticoid modulatory element binding protein 1	154	2	0	2	0	0	0	0	0	0	mmu-miR-384-5p	-0.16	-0.29	0.86
MAP3K1	ENST00000399503.3	mitogen-activated protein kinase kinase kinase 1, E3 ubiquitin protein ligase	137	1	0	0	1	0	0	0	0	0	mmu-miR-30e-5p	-0.16	-0.16	0.78	2011
PHIP	ENST00000275034.4	pleckstrin homology domain interacting protein	668	1	0	1	0	0	0	0	0	0	mmu-miR-384-5p	-0.16	-0.16	0.66	2011
PROM1	ENST00000447510.2	prominin 1	5	1	0	0	1	0	0	0	0	0	mmu-miR-30e-5p	-0.16	-0.16	0.78	2009, 2011
BCL9	ENST00000234739.3	B-cell CLL/lymphoma 9	70	2	0	2	0	0	0	0	0	0	mmu-miR-30b-5p	-0.16	-0.18	0.89	2003, 2005, 2007, 2009, 2011
NREP	ENST00000379671.3	neuronal regeneration related protein	409	1	0	0	1	0	0	0	0	0	mmu-miR-30b-5p	-0.16	-0.18	0.78	2005, 2007, 2009, 2011
PHF13	ENST00000377648.4	PHD finger protein 13	1207	1	0	0	1	0	0	0	0	0	mmu-miR-30a-5p	-0.16	-0.16	0.78	2005, 2007, 2009, 2011
OVOL2	ENST00000278780.6	ovo-like 2 (Drosophila)	17	1	0	0	1	0	0	0	0	1	mmu-miR-30d-5p	-0.16	-0.26	0.78	2009, 2011
SLC38A1	ENST00000398637.5	solute carrier family 38, member 1	1967	1	0	0	1	0	0	0	0	0	mmu-miR-30a-5p	-0.16	-0.16	0.78	2007, 2011
MBD6	ENST00000355673.3	methyl-CpG binding domain protein 6	24	1	0	0	1	0	0	0	0	0	mmu-miR-384-5p	-0.16	-0.16	0.78	2005, 2007, 2009, 2011
PLCXD3	ENST00000377801.3	phosphatidylinositol-specific phospholipase C, X domain containing 3	81	1	0	1	0	0	0	0	0	0	mmu-miR-30b-5p	-0.16	-0.16	0.57	2005, 2007, 2011
IRS1	ENST00000305123.5	insulin receptor substrate 1	804	1	0	1	0	1	0	0	1	1	mmu-miR-30a-5p	-0.16	-0.17	0.71	2007, 2009, 2011
MBNL2	ENST00000345429.6	muscleblind-like splicing regulator 2	34	1	0	1	0	0	0	0	0	0	mmu-miR-30b-5p	-0.16	-0.25	0.69	2007, 2009, 2011
BTBD7	ENST00000334746.5	BTB (POZ) domain containing 7	590	1	0	1	0	0	0	0	0	0	mmu-miR-30b-5p	-0.16	-0.19	0.71	2005, 2007, 2009, 2011
E2F3	ENST00000346618.3	E2F transcription factor 3	91	1	0	1	0	0	0	0	0	1	mmu-miR-30e-5p	-0.16	-0.16	0.65	2005, 2007, 2009, 2011
BDNF	ENST00000439476.2	brain-derived neurotrophic factor	2696	1	0	0	1	0	0	0	0	1	mmu-miR-30e-5p	-0.16	-0.18	0.78	2005, 2007, 2009, 2011
ENOX2	ENST00000370935.1	ecto-NOX disulfide-thiol exchanger 2	215	1	0	1	0	0	0	0	0	0	mmu-miR-30b-5p	-0.16	-0.19	0.64	2007
GOT2	ENST00000245206.5	glutamic-oxaloacetic transaminase 2, mitochondrial	72	1	0	0	1	0	0	0	0	0	mmu-miR-30a-5p	-0.15	-0.18	0.78	2007, 2009, 2011
MAGI2	ENST00000419488.1	membrane associated guanylate kinase, WW and PDZ domain containing 2	43	1	0	1	0	0	0	0	0	0	mmu-miR-30a-5p	-0.15	-0.17	0.7	2007, 2009, 2011
HERC2	ENST00000261609.7	HECT and RLD domain containing E3 ubiquitin protein ligase 2	1207	1	0	1	0	0	0	0	0	0	mmu-miR-384-5p	-0.15	-0.15	0.61	2005, 2007, 2011
HELZ	ENST00000358691.5	helicase with zinc finger	571	1	0	1	0	0	0	0	0	1	mmu-miR-384-5p	-0.15	-0.22	0.71	2007, 2009, 2011
FA2H	ENST00000219368.3	fatty acid 2-hydroxylase	5	1	0	1	0	0	0	0	0	0	mmu-miR-30b-5p	-0.15	-0.15	0.71	2009, 2011
SORCS3	ENST00000369701.3	sortilin-related VPS10 domain containing receptor 3	5	1	0	1	0	0	0	0	0	0	mmu-miR-30a-5p	-0.15	-0.15	0.46	2005, 2007, 2009, 2011
ADAMTS9	ENST00000295903.4	ADAM metallopeptidase with thrombospondin type 1 motif, 9	5	1	0	1	0	0	0	0	0	0	mmu-miR-30a-5p	-0.15	-0.15	0.71	2005, 2007, 2009, 2011
SATB2	ENST00000417098.1	SATB homeobox 2	820	1	0	1	0	0	0	0	0	0	mmu-miR-384-5p	-0.15	-0.17	0.67	2005, 2007, 2011
KIF16B	ENST00000354981.2	kinesin family member 16B	113	1	0	0	1	0	0	0	0	0	mmu-miR-384-5p	-0.15	-0.15	0.78	2005, 2007, 2009
KREMEN1	ENST00000400335.4	kringle containing transmembrane protein 1	606	1	0	1	0	0	0	0	0	0	mmu-miR-30b-5p	-0.15	-0.15	0.71	2007, 2009, 2011
BAZ1A	ENST00000358716.4	bromodomain adjacent to zinc finger domain, 1A	144	1	0	0	1	0	0	0	0	0	mmu-miR-30a-5p	-0.15	-0.15	0.78
LATS2	ENST00000382592.4	large tumor suppressor kinase 2	464	1	0	0	1	0	0	0	0	0	mmu-miR-30b-5p	-0.15	-0.17	0.78	2007, 2009, 2011
MOV10	ENST00000413052.2	Mov10, Moloney leukemia virus 10, homolog (mouse)	248	1	0	0	1	0	0	0	0	0	mmu-miR-30d-5p	-0.15	-0.15	0.78	2007, 2009, 2011
NFYB	ENST00000240055.3	nuclear transcription factor Y, beta	375	1	0	1	0	0	0	0	0	0	mmu-miR-30e-5p	-0.15	-0.26	0.53	2009, 2011
ADAM10	ENST00000260408.3	ADAM metallopeptidase domain 10	385	1	0	0	1	1	0	0	1	0	mmu-miR-30e-5p	-0.15	-0.32	0.78
ROCK2	ENST00000315872.6	Rho-associated, coiled-coil containing protein kinase 2	142	1	0	0	1	0	0	0	0	1	mmu-miR-30e-5p	-0.15	-0.18	0.78
KPNA6	ENST00000373625.3	karyopherin alpha 6 (importin alpha 7)	272	1	0	1	0	0	0	0	0	0	mmu-miR-30e-5p	-0.15	-0.19	0.71	2009, 2011
ADAM12	ENST00000368679.4	ADAM metallopeptidase domain 12	758	1	0	1	0	2	1	1	0	1	mmu-miR-384-5p	-0.15	-0.15	0.7
CHFR	ENST00000315585.7	checkpoint with forkhead and ring finger domains, E3 ubiquitin protein ligase	168	1	0	0	1	0	0	0	0	0	mmu-miR-384-5p	-0.15	-0.15	0.78	2005, 2007, 2009, 2011
KPNA3	ENST00000261667.3	karyopherin alpha 3 (importin alpha 4)	104	1	0	1	0	0	0	0	0	0	mmu-miR-30b-5p	-0.15	-0.19	0.69	2005, 2007, 2009, 2011
RASGEF1A	ENST00000374459.1	RasGEF domain family, member 1A	10	1	0	0	1	0	0	0	0	0	mmu-miR-30a-5p	-0.15	-0.2	0.78	2005, 2007, 2009, 2011
FAM178A	ENST00000238961.4	family with sequence similarity 178, member A	130	1	0	1	0	0	0	0	0	0	mmu-miR-30b-5p	-0.15	-0.15	0.67
KIF3A	ENST00000378746.4	kinesin family member 3A	33	1	0	0	1	1	0	1	0	0	mmu-miR-30b-5p	-0.15	-0.19	0.78	2007, 2009, 2011
GRHL1	ENST00000405379.2	grainyhead-like 1 (Drosophila)	147	1	0	1	0	0	0	0	0	0	mmu-miR-384-5p	-0.14	-0.14	0.71	2007, 2009, 2011
ATP8B1	ENST00000283684.4	ATPase, aminophospholipid transporter, class I, type 8B, member 1	497	1	0	0	1	0	0	0	0	0	mmu-miR-30a-5p	-0.14	-0.17	0.78	2007, 2009, 2011
BCL2	ENST00000398117.1	B-cell CLL/lymphoma 2	55	1	0	0	1	0	0	0	0	1	mmu-miR-30b-5p	-0.14	-0.16	0.78	2005, 2007, 2009, 2011
ELAVL3	ENST00000359227.3	ELAV like neuron-specific RNA binding protein 3	5	1	0	1	0	0	0	0	0	0	mmu-miR-30e-5p	-0.14	-0.14	0.68	2005, 2007, 2009, 2011
UNC5D	ENST00000287272.2	unc-5 homolog D (C. elegans)	37	1	0	0	1	0	0	0	0	0	mmu-miR-30a-5p	-0.14	-0.17	0.78	2005, 2007, 2009, 2011
CNOT6	ENST00000393356.1	CCR4-NOT transcription complex, subunit 6	300	1	0	1	0	2	1	0	1	0	mmu-miR-384-5p	-0.14	-0.35	0.65	2005, 2007, 2009, 2011
RAD51L3-RFFL	ENST00000593039.1	Uncharacterized protein	670	1	0	0	1	0	0	0	0	0	mmu-miR-30b-5p	-0.14	-0.17	0.78
ONECUT2	ENST00000491143.2	one cut homeobox 2	847	1	0	0	1	1	0	0	1	1	mmu-miR-30b-5p	-0.14	-0.15	0.78	2007, 2009, 2011
TIMP2	ENST00000585421.1	TIMP metallopeptidase inhibitor 2	3147	1	0	0	1	0	0	0	0	0	mmu-miR-30e-5p	-0.14	-0.16	0.78	2005, 2007, 2009, 2011
THBS2	ENST00000366787.3	thrombospondin 2	372	1	0	0	1	0	0	0	0	0	mmu-miR-384-5p	-0.14	-0.15	0.78	2005, 2007, 2009, 2011
GLCE	ENST00000559420.2	glucuronic acid epimerase	25	2	0	2	0	0	0	0	0	0	mmu-miR-30e-5p	-0.14	-0.35	0.87	2005, 2007, 2009, 2011
PRKAA2	ENST00000371244.4	protein kinase, AMP-activated, alpha 2 catalytic subunit	561	1	0	1	0	2	0	2	0	2	mmu-miR-384-5p	-0.14	-0.17	0.68
ZFP36L2	ENST00000282388.3	ZFP36 ring finger protein-like 2	317	1	0	1	0	3	1	2	0	0	mmu-miR-30a-5p	-0.14	-0.27	0.71	2011
TSPAN33	ENST00000289407.4	tetraspanin 33	237	1	0	1	0	0	0	0	0	0	mmu-miR-30b-5p	-0.14	-0.14	0.69	2007, 2009, 2011
RNF169	ENST00000299563.4	ring finger protein 169	204	1	0	1	0	1	1	0	0	0	mmu-miR-384-5p	-0.14	-0.16	0.51	2009, 2011
GPR161	ENST00000367838.1	G protein-coupled receptor 161	1712	1	0	1	0	0	0	0	0	1	mmu-miR-30b-5p	-0.14	-0.17	0.58
ITGA9	ENST00000264741.5	integrin, alpha 9	9	1	0	0	1	0	0	0	0	0	mmu-miR-30b-5p	-0.14	-0.14	0.78
ADRB1	ENST00000369295.2	adrenoceptor beta 1	12	1	0	1	0	0	0	0	0	0	mmu-miR-30c-5p	-0.14	-0.14	0.56	2005, 2007, 2009, 2011
PRDM5	ENST00000515109.1	PR domain containing 5	22	1	0	0	1	0	0	0	0	0	mmu-miR-384-5p	-0.14	-0.14	ORF
C16orf52	ENST00000542527.2	chromosome 16 open reading frame 52	102	1	0	1	0	0	0	0	0	1	mmu-miR-30a-5p	-0.14	-0.18	0.52
RFFL	ENST00000315249.7	ring finger and FYVE-like domain containing E3 ubiquitin protein ligase	670	1	0	0	1	0	0	0	0	0	mmu-miR-30b-5p	-0.14	-0.17	0.78	2007, 2009, 2011
UGT8	ENST00000310836.6	UDP glycosyltransferase 8	682	1	0	1	0	0	0	0	0	0	mmu-miR-30e-5p	-0.14	-0.16	0.68
BSN	ENST00000296452.4	bassoon presynaptic cytomatrix protein	31	2	0	1	1	0	0	0	0	0	mmu-miR-30e-5p	-0.14	-0.14	0.93	2005, 2007, 2009, 2011
MATR3	ENST00000510056.1	matrin 3	216	1	0	1	0	0	0	0	0	0	mmu-miR-30b-5p	-0.14	-0.2	0.7	2005, 2007, 2011
GPD1L	ENST00000282541.5	glycerol-3-phosphate dehydrogenase 1-like	130	1	0	1	0	0	0	0	0	0	mmu-miR-30b-5p	-0.14	-0.15	0.69	2011
ZBTB10	ENST00000430430.1	zinc finger and BTB domain containing 10	113	1	0	0	1	0	0	0	0	1	mmu-miR-384-5p	-0.13	-0.16	0.78	2011
ATAD2B	ENST00000238789.5	ATPase family, AAA domain containing 2B	11	2	0	2	0	1	0	1	0	0	mmu-miR-30a-5p	-0.13	-0.21	0.8	2011
HIPK2	ENST00000406875.3	homeodomain interacting protein kinase 2	48	2	0	0	2	1	0	1	0	2	mmu-miR-384-5p	-0.13	-0.15	0.95	2009, 2011
PDGFRB	ENST00000261799.4	platelet-derived growth factor receptor, beta polypeptide	320	1	0	0	1	0	0	0	0	0	mmu-miR-30e-5p	-0.13	-0.13	0.78	2005, 2007, 2009, 2011
RALGPS1	ENST00000259351.5	Ral GEF with PH domain and SH3 binding motif 1	34	1	0	1	0	0	0	0	0	1	mmu-miR-30a-5p	-0.13	-0.34	0.71	2005, 2007, 2009, 2011
ERC2	ENST00000288221.6	ELKS/RAB6-interacting/CAST family member 2	11	1	0	0	1	0	0	0	0	0	mmu-miR-30b-5p	-0.13	-0.13	0.78	2007, 2011
FAF2	ENST00000261942.6	Fas associated factor family member 2	1700	1	0	0	1	0	0	0	0	0	mmu-miR-30e-5p	-0.13	-0.16	0.78	2007, 2009, 2011
PARP8	ENST00000503750.2	poly (ADP-ribose) polymerase family, member 8	80	1	0	1	0	0	0	0	0	1	mmu-miR-30b-5p	-0.13	-0.21	0.71	2011
SLC22A23	ENST00000436008.2	solute carrier family 22, member 23	353	1	0	0	1	0	0	0	0	0	mmu-miR-30c-5p	-0.13	-0.13	0.78	2009, 2011
ZFP36L1	ENST00000555997.1	ZFP36 ring finger protein-like 1	231	1	0	0	1	0	0	0	0	0	mmu-miR-30a-5p	-0.13	-0.15	0.78	2007
NUAK1	ENST00000261402.2	NUAK family, SNF1-like kinase, 1	489	1	0	0	1	0	0	0	0	0	mmu-miR-384-5p	-0.13	-0.13	0.78	2007, 2009, 2011
CDYL2	ENST00000570137.2	chromodomain protein, Y-like 2	239	1	0	0	1	1	0	1	0	0	mmu-miR-30b-5p	-0.13	-0.17	0.78
BACH1	ENST00000286800.3	BTB and CNC homology 1, basic leucine zipper transcription factor 1	273	1	0	0	1	0	0	0	0	1	mmu-miR-384-5p	-0.13	-0.13	0.78	2005, 2007, 2009, 2011
INHBA	ENST00000242208.4	inhibin, beta A	1260	1	0	1	0	0	0	0	0	1	mmu-miR-30a-5p	-0.13	-0.13	0.68
SIDT2	ENST00000324225.4	SID1 transmembrane family, member 2	341	2	0	0	2	0	0	0	0	0	mmu-miR-30a-5p	-0.13	-0.13	0.95	2009, 2011
HSPA5	ENST00000324460.6	heat shock 70kDa protein 5 (glucose-regulated protein, 78kDa)	2715	1	0	1	0	1	0	1	0	0	mmu-miR-30b-5p	-0.13	-0.18	0.71	2005, 2007, 2009, 2011
SATB1	ENST00000338745.6	SATB homeobox 1	312	1	0	0	1	0	0	0	0	0	mmu-miR-30a-5p	-0.13	-0.17	0.78	2005, 2007, 2009, 2011
ZSWIM6	ENST00000252744.5	zinc finger, SWIM-type containing 6	933	1	0	0	1	0	0	0	0	0	mmu-miR-30b-5p	-0.13	-0.13	0.78	2011
DENND5B	ENST00000389082.5	DENN/MADD domain containing 5B	832	1	0	0	1	2	0	2	0	0	mmu-miR-30a-5p	-0.13	-0.13	0.78	2009, 2011
DTNA	ENST00000283365.9	dystrobrevin, alpha	144	1	0	0	1	0	0	0	0	0	mmu-miR-30a-5p	-0.12	-0.13	0.78	2005, 2007, 2011
SLC5A3	ENST00000608209.1	sodium/myo-inositol cotransporter	24	1	0	1	0	1	0	1	0	1	mmu-miR-384-5p	-0.12	-0.2	0.71	2011
TMOD3	ENST00000308580.7	tropomodulin 3 (ubiquitous)	1533	1	0	1	0	0	0	0	0	0	mmu-miR-30b-5p	-0.12	-0.14	0.71	2011
ZCCHC24	ENST00000372336.3	zinc finger, CCHC domain containing 24	359	1	0	1	0	1	1	0	0	0	mmu-miR-30c-5p	-0.12	-0.12	0.71	2005, 2007, 2009, 2011
EBF2	ENST00000535548.1	early B-cell factor 2	11	1	0	1	0	0	0	0	0	0	mmu-miR-30a-5p	-0.12	-0.23	0.62
ATP8A2	ENST00000381655.2	ATPase, aminophospholipid transporter, class I, type 8A, member 2	22	1	0	1	0	1	0	1	0	0	mmu-miR-30e-5p	-0.12	-0.13	0.62	2009, 2011
MID2	ENST00000262843.6	midline 2	194	1	0	0	1	0	0	0	0	0	mmu-miR-30b-5p	-0.12	-0.16	0.78	2011
TNFRSF8	ENST00000263932.2	tumor necrosis factor receptor superfamily, member 8	5	1	0	1	0	0	0	0	0	0	mmu-miR-30a-5p	-0.12	-0.12	0.66
NEDD4L	ENST00000256832.7	neural precursor cell expressed, developmentally down-regulated 4-like, E3 ubiquitin protein ligase	617	1	0	1	0	1	1	0	0	0	mmu-miR-30e-5p	-0.12	-0.31	0.71	2005, 2007, 2009, 2011
HIPK1	ENST00000369558.1	homeodomain interacting protein kinase 1	930	1	0	0	1	0	0	0	0	0	mmu-miR-30b-5p	-0.12	-0.12	0.78	2005, 2007, 2009, 2011
PDS5B	ENST00000315596.10	PDS5, regulator of cohesion maintenance, homolog B (S. cerevisiae)	1493	1	0	1	0	0	0	0	0	0	mmu-miR-30e-5p	-0.12	-0.12	0.4
RP11-766F14.2	ENST00000511828.1	Protein LOC285556	5	1	0	0	1	0	0	0	0	0	mmu-miR-30e-5p	-0.12	-0.12	0.78
RGL1	ENST00000304685.4	ral guanine nucleotide dissociation stimulator-like 1	188	1	0	1	0	0	0	0	0	0	mmu-miR-384-5p	-0.12	-0.13	0.56	2005, 2007, 2009, 2011
GDNF	ENST00000326524.2	glial cell derived neurotrophic factor	7	1	0	0	1	0	0	0	0	0	mmu-miR-30b-5p	-0.12	-0.12	0.78	2011
ALPK3	ENST00000258888.5	alpha-kinase 3	16	1	0	0	1	0	0	0	0	0	mmu-miR-30e-5p	-0.12	-0.12	0.78	2005, 2007, 2009, 2011
RASAL2	ENST00000448150.3	RAS protein activator like 2	950	1	0	0	1	0	0	0	0	0	mmu-miR-384-5p	-0.12	-0.12	0.78	2005, 2007, 2011
FOXO3	ENST00000343882.6	forkhead box O3	32	1	0	0	1	1	0	0	1	0	mmu-miR-30b-5p	-0.12	-0.12	0.78	2005, 2007, 2009, 2011
FAM155A	ENST00000375915.2	family with sequence similarity 155, member A	118	1	0	0	1	0	0	0	0	0	mmu-miR-384-5p	-0.11	-0.11	0.78	2007, 2009, 2011
SEL1L3	ENST00000399878.3	sel-1 suppressor of lin-12-like 3 (C. elegans)	155	1	0	0	1	0	0	0	0	0	mmu-miR-30b-5p	-0.11	-0.21	0.78	2005, 2007, 2009, 2011
HNRNPA1	ENST00000546500.1	heterogeneous nuclear ribonucleoprotein A1	2079	1	0	1	0	0	0	0	0	0	mmu-miR-384-5p	-0.11	-0.12	0.47
CHIC1	ENST00000373504.6	cysteine-rich hydrophobic domain 1	16	1	0	0	1	0	0	0	0	1	mmu-miR-384-5p	-0.11	-0.11	0.78	2007, 2009, 2011
IGF2R	ENST00000356956.1	insulin-like growth factor 2 receptor	46	1	0	0	1	1	0	1	0	0	mmu-miR-30e-5p	-0.11	-0.13	0.78	2005, 2007, 2009, 2011
CACNA1D	ENST00000288139.4	calcium channel, voltage-dependent, L type, alpha 1D subunit	5	1	0	0	1	0	0	0	0	1	mmu-miR-30a-5p	-0.11	-0.11	0.78	2011
GXYLT1	ENST00000398675.3	glucoside xylosyltransferase 1	126	1	0	0	1	0	0	0	0	1	mmu-miR-30b-5p	-0.11	-0.11	0.78	2009, 2011
TRAM2	ENST00000182527.3	translocation associated membrane protein 2	2774	1	0	1	0	1	0	1	0	1	mmu-miR-384-5p	-0.11	-0.11	0.6	2009, 2011
USP44	ENST00000552440.1	ubiquitin specific peptidase 44	29	1	0	1	0	0	0	0	0	0	mmu-miR-30b-5p	-0.11	-0.13	0.58	2005, 2007, 2011
CDH13	ENST00000566620.1	cadherin 13	1020	1	0	0	1	0	0	0	0	0	mmu-miR-30b-5p	-0.11	-0.11	0.78	2005, 2007, 2009, 2011
ADAM11	ENST00000200557.6	ADAM metallopeptidase domain 11	32	1	0	0	1	0	0	0	0	0	mmu-miR-30b-5p	-0.11	-0.15	0.78	2007, 2009, 2011
BEND3	ENST00000369042.1	BEN domain containing 3	13	1	0	1	0	0	0	0	0	1	mmu-miR-30a-5p	-0.11	-0.11	0.64	2009, 2011
ZCCHC14	ENST00000268616.4	zinc finger, CCHC domain containing 14	64	1	0	1	0	0	0	0	0	0	mmu-miR-30c-5p	-0.11	-0.12	0.7	2005, 2007, 2009, 2011
TRIM33	ENST00000358465.2	tripartite motif containing 33	201	1	0	0	1	0	0	0	0	0	mmu-miR-30b-5p	-0.11	-0.18	0.78	2007
IFFO2	ENST00000455833.2	intermediate filament family orphan 2	139	1	0	1	0	0	0	0	0	0	mmu-miR-30e-5p	-0.11	-0.13	0.71	2011
LARP1	ENST00000336314.4	La ribonucleoprotein domain family, member 1	4979	1	0	0	1	0	0	0	0	0	mmu-miR-30d-5p	-0.1	-0.1	0.78	2007, 2009, 2011
ESPN	ENST00000377828.1	espin	513	1	0	1	0	0	0	0	0	0	mmu-miR-30e-5p	-0.1	-0.24	0.7	2005, 2007, 2009, 2011
WBP1L	ENST00000369889.4	WW domain binding protein 1-like	5	1	0	1	0	0	0	0	0	0	mmu-miR-30e-5p	-0.1	-0.1	0.69	2009, 2011
FBXO28	ENST00000424254.2	F-box protein 28	461	1	0	1	0	0	0	0	0	1	mmu-miR-30e-5p	-0.1	-0.22	0.59	2011
FAM129A	ENST00000367511.3	family with sequence similarity 129, member A	213	1	0	1	0	1	0	1	0	1	mmu-miR-30e-5p	-0.1	-0.2	0.54	2009, 2011
H2AFY	ENST00000511689.1	H2A histone family, member Y	2126	1	0	1	0	0	0	0	0	0	mmu-miR-384-5p	-0.1	-0.39	0.7	2009, 2011
BBX	ENST00000415149.2	bobby sox homolog (Drosophila)	141	1	0	0	1	0	0	0	0	0	mmu-miR-30b-5p	-0.1	-0.11	0.78	2011
CEP85L	ENST00000368491.3	centrosomal protein 85kDa-like	14	1	0	0	1	0	0	0	0	0	mmu-miR-30b-5p	-0.1	-0.2	0.78	2011
NRP1	ENST00000374875.1	neuropilin 1	586	1	0	1	0	1	0	0	1	0	mmu-miR-30e-5p	-0.1	-0.11	0.55	2005, 2007
DAB1	ENST00000371236.2	Dab, reelin signal transducer, homolog 1 (Drosophila)	490	1	0	1	0	0	0	0	0	0	mmu-miR-30a-5p	-0.1	-0.15	0.66
DCP2	ENST00000389063.2	decapping mRNA 2	155	1	0	0	1	0	0	0	0	3	mmu-miR-384-5p	-0.1	-0.17	0.78	2005, 2007, 2009, 2011
HECW1	ENST00000395891.2	HECT, C2 and WW domain containing E3 ubiquitin protein ligase 1	11	1	0	1	0	1	1	0	0	1	mmu-miR-30a-5p	-0.1	-0.23	0.71	2009, 2011
CPEB2	ENST00000538197.1	cytoplasmic polyadenylation element binding protein 2	367	1	0	1	0	0	0	0	0	0	mmu-miR-30e-5p	-0.1	-0.1	0.7	2005, 2007, 2009, 2011
SETD1B	ENST00000267197.5	SET domain containing 1B	703	1	0	1	0	0	0	0	0	0	mmu-miR-30e-5p	-0.1	-0.1	0.66	2011
GPR124	ENST00000315215.7	G protein-coupled receptor 124	72	1	0	1	0	1	0	1	0	1	mmu-miR-30b-5p	-0.1	-0.13	0.71	2007, 2009, 2011
STYX	ENST00000354586.4	serine/threonine/tyrosine interacting protein	250	1	0	0	1	0	0	0	0	1	mmu-miR-30b-5p	-0.1	-0.29	0.78	2011
B4GALT5	ENST00000371711.4	UDP-Gal:betaGlcNAc beta 1,4- galactosyltransferase, polypeptide 5	1000	1	0	0	1	0	0	0	0	0	mmu-miR-30b-5p	-0.1	-0.1	0.78	2005, 2007, 2009, 2011
EEA1	ENST00000322349.8	early endosome antigen 1	78	1	0	1	0	0	0	0	0	0	mmu-miR-384-5p	-0.09	-0.14	0.7	2007, 2009, 2011
CNTN2	ENST00000331830.4	contactin 2 (axonal)	5	1	0	0	1	0	0	0	0	1	mmu-miR-30b-5p	-0.09	-0.09	0.78	2009, 2011
AMOTL1	ENST00000317837.9	angiomotin like 1	712	1	0	1	0	0	0	0	0	1	mmu-miR-30b-5p	-0.09	-0.11	0.7	2007, 2009
FZD2	ENST00000315323.3	frizzled family receptor 2	807	1	0	1	0	0	0	0	0	0	mmu-miR-30b-5p	-0.09	-0.1	0.7	2011
PPP2R4	ENST00000393370.2	protein phosphatase 2A activator, regulatory subunit 4	2731	1	0	1	0	0	0	0	0	0	mmu-miR-30a-5p	-0.09	-0.09	0.44
MAN1B1	ENST00000371589.4	mannosidase, alpha, class 1B, member 1	604	1	0	1	0	0	0	0	0	0	mmu-miR-30b-5p	-0.09	-0.09	0.69	2005, 2007, 2009, 2011
NID1	ENST00000366595.3	nidogen 1	303	1	0	0	1	0	0	0	0	0	mmu-miR-30e-5p	-0.09	-0.18	0.78	2007, 2009, 2011
RASSF8	ENST00000541490.1	Ras association (RalGDS/AF-6) domain family (N-terminal) member 8	1290	1	0	0	1	0	0	0	0	0	mmu-miR-30b-5p	-0.09	-0.09	0.78	2011
CECR2	ENST00000400573.5	cat eye syndrome chromosome region, candidate 2	46	1	0	0	1	0	0	0	0	0	mmu-miR-30a-5p	-0.09	-0.11	0.78	2009, 2011
BMP7	ENST00000395863.3	bone morphogenetic protein 7	83	1	0	1	0	0	0	0	0	0	mmu-miR-30b-5p	-0.09	-0.09	0.6	2011
NOTCH1	ENST00000277541.6	notch 1	88	1	0	0	1	0	0	0	0	0	mmu-miR-30b-5p	-0.09	-0.32	0.78	2005, 2007, 2009, 2011
FAM217B	ENST00000358293.3	family with sequence similarity 217, member B	175	1	0	1	0	0	0	0	0	0	mmu-miR-30a-5p	-0.09	-0.09	0.41	2011
NCALD	ENST00000395923.1	neurocalcin delta	49	1	0	0	1	0	0	0	0	0	mmu-miR-30a-5p	-0.09	-0.09	ORF	2005, 2007, 2009, 2011
CAND1	ENST00000545606.1	cullin-associated and neddylation-dissociated 1	1568	2	0	0	2	0	0	0	0	1	mmu-miR-30e-5p	-0.08	-0.29	0.95	2007
SSH1	ENST00000360239.3	slingshot protein phosphatase 1	115	2	0	1	1	0	0	0	0	0	mmu-miR-384-5p	-0.08	-0.17	0.93	2011
FRK	ENST00000606080.1	fyn-related kinase	37	1	0	1	0	1	0	1	0	0	mmu-miR-30b-5p	-0.08	-0.19	0.71	2005, 2007, 2011
RLIM	ENST00000332687.6	ring finger protein, LIM domain interacting	662	1	0	1	0	2	1	1	0	0	mmu-miR-30b-5p	-0.08	-0.3	0.67	2011
FUBP3	ENST00000319725.9	far upstream element (FUSE) binding protein 3	121	1	0	1	0	0	0	0	0	0	mmu-miR-30a-5p	-0.08	-0.22	0.65	2007
UBE2O	ENST00000319380.7	ubiquitin-conjugating enzyme E2O	239	1	0	0	1	0	0	0	0	0	mmu-miR-30a-5p	-0.08	-0.08	0.78	2007, 2009, 2011
PITPNM3	ENST00000421306.3	PITPNM family member 3	5	1	0	1	0	0	0	0	0	0	mmu-miR-30a-5p	-0.08	-0.08	0.67	2011
KIAA0247	ENST00000342745.4	KIAA0247	161	1	0	1	0	0	0	0	0	0	mmu-miR-30b-5p	-0.08	-0.08	0.66	2009, 2011
YY1	ENST00000262238.4	YY1 transcription factor	1803	1	0	0	1	0	0	0	0	1	mmu-miR-30a-5p	-0.08	-0.13	0.78
TSPAN2	ENST00000369516.2	tetraspanin 2	43	1	0	0	1	1	0	1	0	0	mmu-miR-30e-5p	-0.08	-0.33	0.78	2005, 2007, 2009, 2011
PDP2	ENST00000311765.2	pyruvate dehyrogenase phosphatase catalytic subunit 2	102	1	0	0	1	0	0	0	0	0	mmu-miR-384-5p	-0.08	-0.15	0.78	2005, 2007, 2009, 2011
BCL11B	ENST00000357195.3	B-cell CLL/lymphoma 11B (zinc finger protein)	73	1	0	0	1	0	0	0	0	0	mmu-miR-30a-5p	-0.08	-0.08	0.78	2005, 2007, 2009, 2011
XPO1	ENST00000401558.2	exportin 1 (CRM1 homolog, yeast)	404	2	0	1	1	0	0	0	0	0	mmu-miR-384-5p	-0.08	-0.54	0.94	2005, 2007, 2009, 2011
TRAF3	ENST00000560371.1	TNF receptor-associated factor 3	833	1	0	1	0	0	0	0	0	0	mmu-miR-30b-5p	-0.08	-0.11	0.57
CHD5	ENST00000262450.3	chromodomain helicase DNA binding protein 5	5	1	0	0	1	0	0	0	0	1	mmu-miR-30a-5p	-0.08	-0.08	0.78	2005, 2007, 2009, 2011
RPS6KA2	ENST00000265678.4	ribosomal protein S6 kinase, 90kDa, polypeptide 2	1043	2	0	0	2	1	0	1	0	0	mmu-miR-30e-5p	-0.08	-0.1	0.95	2005, 2007, 2009, 2011
PITX1	ENST00000265340.7	paired-like homeodomain 1	1502	1	0	0	1	0	0	0	0	1	mmu-miR-30a-5p	-0.08	-0.08	0.78	2005, 2007, 2009, 2011
ZNF275	ENST00000370251.3	zinc finger protein 275	465	1	0	1	0	0	0	0	0	0	mmu-miR-30e-5p	-0.07	-0.08	0.65	2011
IKZF2	ENST00000457361.1	IKAROS family zinc finger 2 (Helios)	32	1	0	1	0	1	0	1	0	2	mmu-miR-30b-5p	-0.07	-0.07	0.6	2007, 2009, 2011
RASL12	ENST00000220062.4	RAS-like, family 12	39	1	0	1	0	0	0	0	0	0	mmu-miR-30a-5p	-0.07	-0.07	0.43	2005, 2007, 2009, 2011
DAG1	ENST00000515359.2	dystroglycan 1 (dystrophin-associated glycoprotein 1)	241	1	0	1	0	0	0	0	0	0	mmu-miR-384-5p	-0.07	-0.08	0.65	2005, 2007
ADRA2B	ENST00000409345.3	adrenoceptor alpha 2B	7	1	0	1	0	0	0	0	0	0	mmu-miR-30b-5p	-0.07	-0.07	0.62	2011
WNK3	ENST00000375169.3	WNK lysine deficient protein kinase 3	55	1	0	1	0	0	0	0	0	0	mmu-miR-30b-5p	-0.07	-0.07	0.47
ATP8B2	ENST00000368489.3	ATPase, aminophospholipid transporter, class I, type 8B, member 2	244	1	0	0	1	0	0	0	0	0	mmu-miR-30e-5p	-0.07	-0.16	0.78	2005, 2007, 2009, 2011
PSME3	ENST00000541124.1	proteasome (prosome, macropain) activator subunit 3 (PA28 gamma; Ki)	3605	1	0	1	0	0	0	0	0	0	mmu-miR-30b-5p	-0.07	-0.22	0.63	2005, 2007, 2009, 2011
C7orf60	ENST00000297145.4	chromosome 7 open reading frame 60	39	1	0	0	1	0	0	0	0	0	mmu-miR-30e-5p	-0.07	-0.07	0.78	2005, 2007, 2009, 2011
PELI2	ENST00000267460.4	pellino E3 ubiquitin protein ligase family member 2	229	1	0	1	0	0	0	0	0	0	mmu-miR-30b-5p	-0.07	-0.07	0.69	2009, 2011
CAPRIN1	ENST00000341394.4	cell cycle associated protein 1	650	1	0	1	0	0	0	0	0	0	mmu-miR-30a-5p	-0.07	-0.14	0.46	2011
EBF3	ENST00000368648.3	early B-cell factor 3	101	1	0	1	0	0	0	0	0	0	mmu-miR-30b-5p	-0.07	-0.07	0.7	2007, 2009, 2011
MYO9B	ENST00000595618.1	myosin IXB	413	1	0	0	1	0	0	0	0	0	mmu-miR-30a-5p	-0.07	-0.12	0.78	2009, 2011
SOBP	ENST00000317357.5	sine oculis binding protein homolog (Drosophila)	22	1	0	1	0	0	0	0	0	0	mmu-miR-30b-5p	-0.07	-0.21	0.69	2007, 2009, 2011
FNDC3B	ENST00000336824.4	fibronectin type III domain containing 3B	509	1	0	0	1	0	0	0	0	0	mmu-miR-30a-5p	-0.06	-0.12	0.78	2005, 2007, 2009, 2011
KIAA1244	ENST00000251691.4	KIAA1244	169	1	0	1	0	0	0	0	0	1	mmu-miR-30e-5p	-0.06	-0.09	0.43	2011
RNF217	ENST00000521654.2	ring finger protein 217	92	1	0	1	0	3	0	3	0	0	mmu-miR-384-5p	-0.06	-0.21	0.63
ARIH1	ENST00000379887.4	ariadne RBR E3 ubiquitin protein ligase 1	671	1	0	1	0	0	0	0	0	0	mmu-miR-384-5p	-0.06	-0.1	0.52
CELF2	ENST00000379261.4	CUGBP, Elav-like family member 2	45	1	0	1	0	1	1	0	0	2	mmu-miR-384-5p	-0.06	-0.09	0.46	2005, 2007
PPP6C	ENST00000373547.4	protein phosphatase 6, catalytic subunit	346	1	0	0	1	0	0	0	0	0	mmu-miR-30a-5p	-0.06	-0.13	0.78
GAREM	ENST00000399218.4	GRB2 associated, regulator of MAPK1	536	1	0	0	1	0	0	0	0	0	mmu-miR-30b-5p	-0.06	-0.08	0.78
RPRD2	ENST00000539519.1	regulation of nuclear pre-mRNA domain containing 2	280	1	0	1	0	0	0	0	0	0	mmu-miR-384-5p	-0.06	-0.15	0.64	2011
ESRRG	ENST00000361525.3	estrogen-related receptor gamma	5	1	0	1	0	0	0	0	0	0	mmu-miR-30e-5p	-0.06	-0.06	0.69	2005, 2007, 2009, 2011
CFL2	ENST00000341223.3	cofilin 2 (muscle)	902	2	0	2	0	1*	0	0	0	0	mmu-miR-30b-5p	-0.06	-0.52	0.91	2011
PCDH19	ENST00000420881.2	protocadherin 19	7	1	0	1	0	1	0	1	0	0	mmu-miR-384-5p	-0.06	-0.06	0.47	2005, 2007, 2009, 2011
NCS1	ENST00000372398.3	neuronal calcium sensor 1	1083	1	0	0	1	0	0	0	0	0	mmu-miR-30b-5p	-0.05	-0.07	0.78	2005, 2007, 2009, 2011
LONRF3	ENST00000304778.7	LON peptidase N-terminal domain and ring finger 3	36	1	0	0	1	0	0	0	0	0	mmu-miR-30b-5p	-0.05	-0.13	0.78
MAPKBP1	ENST00000457542.2	mitogen-activated protein kinase binding protein 1	36	1	0	0	1	0	0	0	0	0	mmu-miR-30b-5p	-0.05	-0.05	0.78	2009, 2011
RAB10	ENST00000264710.4	RAB10, member RAS oncogene family	998	1	0	1	0	0	0	0	0	0	mmu-miR-30e-5p	-0.05	-0.26	0.63	2007
PHF6	ENST00000332070.3	PHD finger protein 6	630	1	0	1	0	0	0	0	0	0	mmu-miR-30e-5p	-0.05	-0.05	0.51	2005, 2007
ZFHX3	ENST00000268489.5	zinc finger homeobox 3	57	1	0	1	0	2	0	2	0	0	mmu-miR-30a-5p	-0.05	-0.06	0.41	2007
ADARB2	ENST00000381312.1	adenosine deaminase, RNA-specific, B2 (non-functional)	9	1	0	1	0	1	1	0	0	0	mmu-miR-30b-5p	-0.05	-0.11	0.61	2011
FAM46C	ENST00000369448.3	family with sequence similarity 46, member C	74	1	0	1	0	0	0	0	0	0	mmu-miR-384-5p	-0.05	-0.17	0.63	2005, 2007, 2009, 2011
HOXA9	ENST00000396345.1	homeobox A9	151	1	0	0	1	0	0	0	0	1	mmu-miR-384-5p	-0.05	-0.22	0.78
UBE2R2	ENST00000263228.3	ubiquitin-conjugating enzyme E2R 2	2442	1	0	0	1	1	0	0	1	0	mmu-miR-384-5p	-0.05	-0.36	0.78	2005, 2007, 2009, 2011
ZFYVE26	ENST00000347230.4	zinc finger, FYVE domain containing 26	104	1	0	1	0	0	0	0	0	0	mmu-miR-30b-5p	-0.05	-0.06	0.67	2005, 2007, 2009, 2011
ZBTB34	ENST00000319119.4	zinc finger and BTB domain containing 34	726	1	0	1	0	1	0	1	0	1	mmu-miR-30e-5p	-0.05	-0.05	0.66	2009, 2011
ANKRD52	ENST00000267116.7	ankyrin repeat domain 52	2913	1	0	0	1	1	0	1	0	0	mmu-miR-30b-5p	-0.05	-0.05	0.78	2011
IPMK	ENST00000373935.3	inositol polyphosphate multikinase	196	1	0	0	1	2	0	0	2	0	mmu-miR-30a-5p	-0.05	-0.16	0.95	2011
WDFY3	ENST00000322366.6	WD repeat and FYVE domain containing 3	596	1	0	0	1	0	0	0	0	0	mmu-miR-30a-5p	-0.04	-0.04	0.78
ABCB7	ENST00000253577.3	ATP-binding cassette, sub-family B (MDR/TAP), member 7	77	1	0	0	1	2	1	1	0	0	mmu-miR-384-5p	-0.04	-0.37	0.78
AZIN1	ENST00000337198.5	antizyme inhibitor 1	2287	1	0	0	1	0	0	0	0	0	mmu-miR-30e-5p	-0.04	-0.3	0.78	2007, 2009, 2011
OSBPL8	ENST00000393249.2	oxysterol binding protein-like 8	141	1	0	0	1	1	0	0	1	0	mmu-miR-30e-5p	-0.04	-0.38	0.95	2005, 2007, 2011
RP1-170O19.20	ENST00000470747.4	Uncharacterized protein	151	1	0	0	1	0	0	0	0	1	mmu-miR-384-5p	-0.04	-0.2	0.78
NR3C2	ENST00000344721.4	nuclear receptor subfamily 3, group C, member 2	425	1	0	0	1	0	0	0	0	0	mmu-miR-30a-5p	-0.04	-0.04	0.78	2005, 2007, 2009, 2011
REV3L	ENST00000368802.3	REV3-like, polymerase (DNA directed), zeta, catalytic subunit	9	1	0	1	0	1	0	1	0	0	mmu-miR-30a-5p	-0.04	-0.04	0.69	2009, 2011
ELFN2	ENST00000402918.2	extracellular leucine-rich repeat and fibronectin type III domain containing 2	22	1	0	0	1	0	0	0	0	0	mmu-miR-384-5p	-0.04	-0.12	0.78	2007, 2009, 2011
PEAK1	ENST00000312493.4	pseudopodium-enriched atypical kinase 1	209	1	0	1	0	0	0	0	0	0	mmu-miR-30a-5p	-0.04	-0.04	0.69	2009, 2011
MARK3	ENST00000303622.9	MAP/microtubule affinity-regulating kinase 3	1468	1	0	0	1	0	0	0	0	0	mmu-miR-384-5p	-0.04	-0.2	0.78	2005, 2007
DMD	ENST00000378677.2	dystrophin	211	1	0	0	1	0	0	0	0	0	mmu-miR-30a-5p	-0.04	-0.17	0.78	2011
AMOT	ENST00000304758.1	angiomotin	515	1	0	1	0	1	0	1	0	0	mmu-miR-384-5p	-0.04	-0.05	0.45
FYN	ENST00000368682.3	FYN oncogene related to SRC, FGR, YES	2659	1	0	0	1	0	0	0	0	0	mmu-miR-30b-5p	-0.03	-0.27	0.78
AHNAK	ENST00000378024.4	AHNAK nucleoprotein	682	1	0	1	0	0	0	0	0	0	mmu-miR-30c-5p	-0.03	-0.03	0.56	2007, 2009, 2011
TRPM3	ENST00000377110.3	transient receptor potential cation channel, subfamily M, member 3	11	1	0	1	0	0	0	0	0	1	mmu-miR-30b-5p	-0.03	-0.07	0.71
PDCD10	ENST00000392750.2	programmed cell death 10	638	1	0	0	1	0	0	0	0	0	mmu-miR-30e-5p	-0.03	-0.32	0.78	2005, 2007, 2009, 2011
KIF1C	ENST00000320785.5	kinesin family member 1C	149	1	0	1	0	0	0	0	0	0	mmu-miR-30b-5p	-0.03	-0.06	0.64	2011
TMEM110	ENST00000355083.5	transmembrane protein 110	306	1	0	0	1	0	0	0	0	2	mmu-miR-30b-5p	-0.03	-0.17	0.78	2011
KCTD20	ENST00000373731.2	potassium channel tetramerization domain containing 20	88	1	0	1	0	0	0	0	0	0	mmu-miR-384-5p	-0.03	-0.05	0.71
ZNF704	ENST00000327835.3	zinc finger protein 704	124	1	0	0	1	0	0	0	0	0	mmu-miR-30e-5p	-0.03	-0.13	0.78	2011
HIAT1	ENST00000370152.3	hippocampus abundant transcript 1	1473	1	0	0	1	0	0	0	0	0	mmu-miR-30b-5p	-0.03	-0.26	0.78	2005, 2007
AGO2	ENST00000220592.5	argonaute RISC catalytic component 2	350	1	0	1	0	0	0	0	0	0	mmu-miR-30e-5p	-0.03	-0.5	0.54
PAX9	ENST00000361487.6	paired box 9	53	1	0	0	1	0	0	0	0	0	mmu-miR-30b-5p	-0.02	-0.1	0.78
IGF1R	ENST00000268035.6	insulin-like growth factor 1 receptor	561	1	0	0	1	1	0	1	0	0	mmu-miR-30a-5p	-0.02	-0.03	0.78	2007, 2009, 2011
LPHN3	ENST00000512091.2	latrophilin 3	93	1	0	1	0	1	1	0	0	1	mmu-miR-30a-5p	-0.02	-0.05	< 0.1	2005, 2007
TIMM22	ENST00000327158.4	translocase of inner mitochondrial membrane 22 homolog (yeast)	290	1	0	0	1	1	0	1	0	0	mmu-miR-384-5p	-0.02	-0.28	0.78
LPAR3	ENST00000440886.1	lysophosphatidic acid receptor 3	35	1	0	0	1	0	0	0	0	0	mmu-miR-30e-5p	-0.02	-0.15	0.78
SUPT3H	ENST00000371460.1	suppressor of Ty 3 homolog (S. cerevisiae)	175	1	0	1	0	0	0	0	0	1	mmu-miR-30e-5p	-0.02	-0.22	0.71	2005, 2007, 2009, 2011
DRAXIN	ENST00000294485.5	dorsal inhibitory axon guidance protein	5	1	0	1	0	0	0	0	0	0	mmu-miR-30a-5p	-0.02	-0.02	0.7
INSIG2	ENST00000245787.4	insulin induced gene 2	562	1	0	1	0	0	0	0	0	0	mmu-miR-30a-5p	-0.02	-0.34	0.7	2005, 2007, 2009, 2011
FYCO1	ENST00000296137.2	FYVE and coiled-coil domain containing 1	91	1	0	1	0	0	0	0	0	0	mmu-miR-30a-5p	-0.02	-0.02	0.53	2005, 2007, 2011
HLX	ENST00000366903.6	H2.0-like homeobox	28	1	0	1	0	0	0	0	0	0	mmu-miR-30b-5p	-0.02	-0.25	0.7	2007, 2009, 2011
IRF2BP2	ENST00000366610.3	interferon regulatory factor 2 binding protein 2	8690	1	0	0	1	0	0	0	0	0	mmu-miR-30c-5p	-0.02	-0.13	0.78	2011
RAB11A	ENST00000569896.1	RAB11A, member RAS oncogene family	5781	1	0	1	0	0	0	0	0	0	mmu-miR-30e-5p	-0.02	-0.28	0.68	2005, 2007, 2011
PSD3	ENST00000327040.8	pleckstrin and Sec7 domain containing 3	133	1	0	0	1	0	0	0	0	0	mmu-miR-30b-5p	-0.02	-0.23	0.78	2007, 2009, 2011
CCPG1	ENST00000310958.6	cell cycle progression 1	808	1	0	1	0	1	0	1	0	0	mmu-miR-30b-5p	-0.02	-0.12	0.57	2005, 2007, 2009, 2011
NSUN3	ENST00000314622.4	NOP2/Sun domain family, member 3	220	1	0	1	0	0	0	0	0	0	mmu-miR-30a-5p	-0.02	-0.2	0.71
KLHL24	ENST00000454652.2	kelch-like family member 24	143	1	0	1	0	1	0	1	0	0	mmu-miR-384-5p	-0.02	-0.22	0.4	2007, 2011
GADD45GIP1	ENST00000316939.1	growth arrest and DNA-damage-inducible, gamma interacting protein 1	981	1	0	1	0	0	0	0	0	0	mmu-miR-384-5p	-0.01	-0.17	0.7
NRG2	ENST00000394770.1	neuregulin 2	9	1	0	0	1	1	1	0	0	0	mmu-miR-30a-5p	-0.01	-0.05	0.78	2011
ZNF652	ENST00000362063.2	zinc finger protein 652	33	1	0	0	1	2	0	2	0	1	mmu-miR-30a-5p	-0.01	-0.28	0.84	2011
IER2	ENST00000292433.3	immediate early response 2	81	1	0	1	0	0	0	0	0	0	mmu-miR-30a-5p	-0.01	-0.26	0.54	2005, 2007, 2011
ZSWIM5	ENST00000359600.5	zinc finger, SWIM-type containing 5	31	1	0	1	0	1	0	1	0	0	mmu-miR-30b-5p	-0.01	-0.09	0.42	2011
PANX1	ENST00000227638.3	pannexin 1	576	1	0	1	0	0	0	0	0	1	mmu-miR-384-5p	-0.01	-0.11	0.65
UNKL	ENST00000389221.4	unkempt homolog (Drosophila)-like	308	1	0	0	1	0	0	0	0	0	mmu-miR-30e-5p	-0.01	-0.19	0.78	2009, 2011
SCAMP1	ENST00000538629.1	secretory carrier membrane protein 1	816	1	0	1	0	0	0	0	0	0	mmu-miR-384-5p	-0.01	-0.22	0.7	2005, 2007, 2009, 2011
SEC14L2	ENST00000312932.9	SEC14-like 2 (S. cerevisiae)	187	1	0	0	1	0	0	0	0	0	mmu-miR-384-5p	-0.01	-0.15	0.78	2009, 2011
RNF24	ENST00000336095.6	ring finger protein 24	448	1	0	0	1	0	0	0	0	0	mmu-miR-384-5p	-0.01	-0.17	0.78
TADA2B	ENST00000310074.7	transcriptional adaptor 2B	38	1	0	1	0	0	0	0	0	0	mmu-miR-30a-5p	-0.01	-0.02	0.62	2009, 2011
URM1	ENST00000372850.1	ubiquitin related modifier 1	345	1	0	1	0	0	0	0	0	0	mmu-miR-384-5p	-0.01	-0.17	0.52
KMT2D	ENST00000301067.7	lysine (K)-specific methyltransferase 2D	78	1	0	0	1	0	0	0	0	0	mmu-miR-30a-5p	-0.01	-0.01	0.78	2007, 2009, 2011
VPS33A	ENST00000267199.4	vacuolar protein sorting 33 homolog A (S. cerevisiae)	282	1	0	1	0	0	0	0	0	0	mmu-miR-30b-5p	-0.01	-0.07	0.7
SNX2	ENST00000379516.2	sorting nexin 2	397	1	0	1	0	0	0	0	0	0	mmu-miR-30b-5p	-0.01	-0.16	0.66
MED12L	ENST00000474524.1	mediator complex subunit 12-like	30	1	0	1	0	0	0	0	0	0	mmu-miR-30b-5p	-0.01	-0.03	0.61
FRMPD4	ENST00000380682.1	FERM and PDZ domain containing 4	25	1	0	1	0	0	0	0	0	1	mmu-miR-30b-5p	-0.01	-0.03	0.4
USP49	ENST00000394253.3	ubiquitin specific peptidase 49	44	1	0	1	0	1	1	0	0	0	mmu-miR-30a-5p	-0.01	-0.05	0.69
PACRGL	ENST00000502374.1	PARK2 co-regulated-like	314	1	0	0	1	0	0	0	0	0	mmu-miR-30b-5p	-0.01	-0.24	0.78
ABI2	ENST00000295851.5	abl-interactor 2	877	1	0	0	1	4	1	2	1	2	mmu-miR-30e-5p	-0.01	-0.47	0.78	2009, 2011
RBM15B	ENST00000323686.4	RNA binding motif protein 15B	1925	1	0	1	0	0	0	0	0	0	mmu-miR-30b-5p	-0.01	-0.2	0.68	2011
B3GALT6	ENST00000379198.2	UDP-Gal:betaGal beta 1,3-galactosyltransferase polypeptide 6	2444	1	0	0	1	0	0	0	0	0	mmu-miR-30a-5p	-0.01	-0.24	0.78	2009, 2011
GTDC1	ENST00000392869.2	glycosyltransferase-like domain containing 1	241	1	0	1	0	0	0	0	0	0	mmu-miR-30a-5p	-0.01	-0.1	0.7
GAS7	ENST00000437099.2	growth arrest-specific 7	186	1	0	1	0	0	0	0	0	0	mmu-miR-30a-5p	-0.01	-0.1	0.7	2009, 2011
NSD1	ENST00000439151.2	nuclear receptor binding SET domain protein 1	685	1	0	1	0	0	0	0	0	0	mmu-miR-30a-5p	-0.01	-0.02	0.56	2011
PAPD5	ENST00000357464.3	PAP associated domain containing 5	152	1	0	1	0	0	0	0	0	0	mmu-miR-30b-5p	0	-0.14	0.67	2007, 2009, 2011
PSMD9	ENST00000541212.1	proteasome (prosome, macropain) 26S subunit, non-ATPase, 9	1981	1	0	1	0	0	0	0	0	1	mmu-miR-30a-5p	0	-0.17	0.5	2009, 2011
YBX1	ENST00000321358.7	Y box binding protein 1	4740	1	0	0	1	0	0	0	0	0	mmu-miR-30b-5p	0	-0.32	0.78	2007
USP15	ENST00000353364.3	ubiquitin specific peptidase 15	286	1	0	0	1	2	0	2	0	0	mmu-miR-30e-5p	0	-0.5	0.78	2005, 2007, 2009, 2011
AKIRIN1	ENST00000432648.3	akirin 1	798	1	0	1	0	0	0	0	0	0	mmu-miR-384-5p	0	-0.2	0.71
COG5	ENST00000347053.3	component of oligomeric golgi complex 5	455	1	0	0	1	0	0	0	0	0	mmu-miR-30e-5p	0	-0.18	0.78
USP14	ENST00000261601.7	ubiquitin specific peptidase 14 (tRNA-guanine transglycosylase)	561	1	0	1	0	0	0	0	0	0	mmu-miR-30b-5p	0	-0.3	0.71
SLC29A3	ENST00000373189.5	solute carrier family 29 (equilibrative nucleoside transporter), member 3	174	1	0	1	0	0	0	0	0	0	mmu-miR-30e-5p	0	-0.13	0.69
CHST12	ENST00000258711.6	carbohydrate (chondroitin 4) sulfotransferase 12	6204	1	0	1	0	0	0	0	0	0	mmu-miR-30a-5p	0	-0.26	0.65	2009, 2011
PON2	ENST00000536183.1	paraoxonase 2	597	1	0	1	0	1	0	1	0	0	mmu-miR-30a-5p	0	-0.2	0.7	2005, 2007, 2009, 2011
SIK3	ENST00000375300.1	SIK family kinase 3	134	1	0	1	0	1*	0	0	0	0	mmu-miR-384-5p	0	-0.04	0.7	2009, 2011
GATA6	ENST00000269216.3	GATA binding protein 6	691	1	0	0	1	0	0	0	0	1	mmu-miR-384-5p	0	-0.09	0.78	2005, 2007
DHX40	ENST00000251241.4	DEAH (Asp-Glu-Ala-His) box polypeptide 40	538	1	0	1	0	0	0	0	0	0	mmu-miR-384-5p	0	-0.16	0.71	2007, 2009, 2011
RAPH1	ENST00000319170.5	Ras association (RalGDS/AF-6) and pleckstrin homology domains 1	126	1	0	1	0	0	0	0	0	1	mmu-miR-30b-5p	0	-0.03	0.63	2005, 2007, 2009, 2011
KIAA1211	ENST00000504228.1	KIAA1211	631	1	0	1	0	0	0	0	0	0	mmu-miR-30b-5p	0	-0.19	0.71	2009, 2011
FTO	ENST00000471389.1	fat mass and obesity associated	240	1	0	1	0	1	0	1	0	0	mmu-miR-30a-5p	0	-0.04	0.71
CADM1	ENST00000452722.3	cell adhesion molecule 1	676	1	0	1	0	0	0	0	0	0	mmu-miR-384-5p	0	-0.11	0.71
CBX2	ENST00000310942.4	chromobox homolog 2	1816	1	0	1	0	1	1	0	0	0	mmu-miR-30e-5p	0	-0.14	0.71	2007, 2009, 2011
IER5	ENST00000367577.4	immediate early response 5	11212	1	0	0	1	0	0	0	0	0	mmu-miR-30a-5p	0	-0.17	0.78	2005, 2007, 2009, 2011
CSNK2A1	ENST00000349736.5	casein kinase 2, alpha 1 polypeptide	1927	1	0	0	1	0	0	0	0	0	mmu-miR-30e-5p	0	-0.11	0.78
PTAFR	ENST00000373857.3	platelet-activating factor receptor	5	1	0	1	0	0	0	0	0	0	mmu-miR-30a-5p	0	-0.31	0.69	2011
STX7	ENST00000367941.2	syntaxin 7	1395	1	0	1	0	0	0	0	0	0	mmu-miR-30e-5p	0	-0.14	0.71
DLK1	ENST00000341267.4	delta-like 1 homolog (Drosophila)	1865	1	0	1	0	0	0	0	0	0	mmu-miR-30a-5p	0	-0.02	0.46
FAM216A	ENST00000377673.5	family with sequence similarity 216, member A	1234	1	0	0	1	0	0	0	0	0	mmu-miR-30a-5p	0	-0.25	0.78
G3BP2	ENST00000395719.3	GTPase activating protein (SH3 domain) binding protein 2	4413	1	0	0	1	0	0	0	0	0	mmu-miR-30a-5p	0	-0.12	0.78
CLEC14A	ENST00000342213.2	C-type lectin domain family 14, member A	5	1	0	1	0	0	0	0	0	1	mmu-miR-30a-5p	0	-0.14	0.7
CELF5	ENST00000541430.2	CUGBP, Elav-like family member 5	5	1	0	1	0	0	0	0	0	0	mmu-miR-384-5p	0	-0.14	0.7	2011
CYB5B	ENST00000512062.1	cytochrome b5 type B (outer mitochondrial membrane)	2472	1	0	1	0	0	0	0	0	0	mmu-miR-30a-5p	0	-0.12	0.7	2009, 2011
KLF14	ENST00000310992.4	Kruppel-like factor 14	8	1	0	1	0	0	0	0	0	0	mmu-miR-30a-5p	0	-0.29	0.63
CD226	ENST00000581982.1	CD226 molecule	8	1	0	0	1	0	0	0	0	0	mmu-miR-30a-5p	0	-0.19	0.78
CLDN19	ENST00000296387.1	claudin 19	25	1	0	1	0	1	0	0	1	0	mmu-miR-30a-5p	0	-0.21	0.67
SPATS2L	ENST00000358677.5	spermatogenesis associated, serine-rich 2-like	3387	1	0	1	0	0	0	0	0	0	mmu-miR-30a-5p	0	-0.02	0.53

## Sheet: miR-375-3p
Ortholog of target gene	Representative transcript	Gene name	3P-seq tags + 5	Conserved sites total	Conserved 8mer sites	Conserved 7mer-m8 sites	Conserved 7mer-A1 sites	Poorly conserved sites total	Poorly conserved 8mer sites	Poorly conserved 7mer-m8 sites	Poorly conserved 7mer-A1 sites	6mer sites	Representative miRNA	Cumulative weighted context++ score	Total context++ score	Aggregate PCT	Previous TargetScan publication(s)
ELAVL4	ENST00000371824.1	ELAV like neuron-specific RNA binding protein 4	5	3	1	0	2	0	0	0	0	0	mmu-miR-375-3p	-0.56	-0.56	0.58	2005, 2007, 2009, 2011
SLC16A2	ENST00000587091.1	solute carrier family 16, member 2 (thyroid hormone transporter)	22	2	1	0	1	0	0	0	0	0	mmu-miR-375-3p	-0.37	-0.38	0.36	2005, 2007, 2009, 2011
SHOX2	ENST00000490689.2	short stature homeobox 2	66	1	1	0	0	1	0	0	1	0	mmu-miR-375-3p	-0.35	-0.45	< 0.1	2007, 2009, 2011
HNF1B	ENST00000225893.4	HNF1 homeobox B	25	1	1	0	0	0	0	0	0	0	mmu-miR-375-3p	-0.32	-0.32	< 0.1	2011
PPP2R2A	ENST00000380737.3	protein phosphatase 2, regulatory subunit B, alpha	236	1	1	0	0	0	0	0	0	0	mmu-miR-375-3p	-0.25	-0.25	< 0.1	2009, 2011
ARL4C	ENST00000390645.2	ADP-ribosylation factor-like 4C	84	1	1	0	0	0	0	0	0	1	mmu-miR-375-3p	-0.21	-0.21	< 0.1	2007, 2009, 2011
EPHA4	ENST00000281821.2	EPH receptor A4	64	1	1	0	0	1	0	0	1	1	mmu-miR-375-3p	-0.07	-0.08	< 0.1	2009, 2011
ISL2	ENST00000290759.4	ISL LIM homeobox 2	381	1	1	0	0	0	0	0	0	1	mmu-miR-375-3p	-0.06	-0.13	< 0.1	2009, 2011
NFIX	ENST00000360105.4	nuclear factor I/X (CCAAT-binding transcription factor)	24	1	1	0	0	0	0	0	0	1	mmu-miR-375-3p	-0.01	-0.04	< 0.1	2005, 2007, 2009, 2011
CHSY1	ENST00000254190.3	chondroitin sulfate synthase 1	200	2	0	0	2	1	1	0	0	2	mmu-miR-375-3p	-0.43	-0.66	0.59	2009, 2011
CCDC39	ENST00000273654.4	coiled-coil domain containing 39	5	1	0	0	1	2	0	1	1	0	mmu-miR-375-3p	-0.4	-0.4	< 0.1
C3orf38	ENST00000486971.1	chromosome 3 open reading frame 38	683	1	0	0	1	1	0	0	1	1	mmu-miR-375-3p	-0.37	-0.46	0.31	2007
YBX1	ENST00000321358.7	Y box binding protein 1	4740	1	0	0	1	0	0	0	0	0	mmu-miR-375-3p	-0.33	-0.33	0.36	2007
PAX2	ENST00000370296.2	paired box 2	8	1	0	0	1	1	0	0	1	1	mmu-miR-375-3p	-0.32	-0.32	0.39	2005, 2007
EBF3	ENST00000368648.3	early B-cell factor 3	101	1	0	0	1	2	0	1	1	1	mmu-miR-375-3p	-0.32	-0.35	0.35	2007, 2009, 2011
C8orf86	ENST00000358138.1	chromosome 8 open reading frame 86	5	1	0	0	1	1	0	0	1	1	mmu-miR-375-3p	-0.32	-0.32	0.36	2005, 2007, 2009, 2011
FZD8	ENST00000374694.1	frizzled family receptor 8	791	1	0	0	1	1	0	0	1	1	mmu-miR-375-3p	-0.32	-0.32	0.54	2005, 2007, 2009, 2011
MXI1	ENST00000332674.5	MAX interactor 1, dimerization protein	278	2	0	0	2	0	0	0	0	0	mmu-miR-375-3p	-0.31	-0.33	0.58	2005, 2007
ZFP36L2	ENST00000282388.3	ZFP36 ring finger protein-like 2	317	2	0	0	2	0	0	0	0	0	mmu-miR-375-3p	-0.3	-0.3	0.59	2005, 2007, 2009
GRIN2B	ENST00000609686.1	glutamate receptor, ionotropic, N-methyl D-aspartate 2B	5	1	0	0	1	0	0	0	0	4	mmu-miR-375-3p	-0.25	-0.25	0.36
UBE2E2	ENST00000396703.1	ubiquitin-conjugating enzyme E2E 2	794	1	0	0	1	1	0	0	1	1	mmu-miR-375-3p	-0.24	-0.34	0.36	2005, 2007, 2011
ADAT2	ENST00000606514.1	adenosine deaminase, tRNA-specific 2	303	1	0	0	1	1	0	0	1	1	mmu-miR-375-3p	-0.23	-0.25	0.36	2009, 2011
IFT20	ENST00000357896.3	intraflagellar transport 20 homolog (Chlamydomonas)	912	1	0	0	1	0	0	0	0	0	mmu-miR-375-3p	-0.23	-0.23	ORF	2007, 2009, 2011
XPR1	ENST00000367590.4	xenotropic and polytropic retrovirus receptor 1	544	1	0	0	1	1	0	0	1	0	mmu-miR-375-3p	-0.23	-0.24	0.57	2005, 2007, 2011
LRP5	ENST00000294304.7	low density lipoprotein receptor-related protein 5	397	1	0	0	1	0	0	0	0	0	mmu-miR-375-3p	-0.22	-0.23	0.35	2005, 2007, 2009, 2011
OTP	ENST00000306422.3	orthopedia homeobox	9	1	0	0	1	1	0	0	1	0	mmu-miR-375-3p	-0.22	-0.22	0.41	2005, 2007, 2009, 2011
MOB1A	ENST00000396049.4	MOB kinase activator 1A	963	1	0	0	1	0	0	0	0	1	mmu-miR-375-3p	-0.22	-0.23	0.34	2005, 2007
CTBP2	ENST00000337195.5	C-terminal binding protein 2	16	1	0	0	1	1	0	0	1	1	mmu-miR-375-3p	-0.22	-0.22	0.36	2009, 2011
MEIS1	ENST00000488550.1	Meis homeobox 1	533	1	0	0	1	1	0	0	1	0	mmu-miR-375-3p	-0.22	-0.22	0.36	2009, 2011
PPARGC1B	ENST00000309241.5	peroxisome proliferator-activated receptor gamma, coactivator 1 beta	12	1	0	0	1	1	1	0	0	0	mmu-miR-375-3p	-0.21	-0.26	0.36	2011
JAK2	ENST00000381652.3	Janus kinase 2	17	1	0	0	1	1	0	0	1	0	mmu-miR-375-3p	-0.21	-0.21	0.58	2011
CEPT1	ENST00000545121.1	choline/ethanolamine phosphotransferase 1	148	1	0	0	1	0	0	0	0	0	mmu-miR-375-3p	-0.21	-0.21	0.35	2011
ZFPM2	ENST00000407775.2	zinc finger protein, FOG family member 2	595	1	0	0	1	0	0	0	0	0	mmu-miR-375-3p	-0.21	-0.21	0.35	2005, 2007
ATP1B1	ENST00000367816.1	ATPase, Na+/K+ transporting, beta 1 polypeptide	656	1	0	0	1	0	0	0	0	0	mmu-miR-375-3p	-0.2	-0.2	0.36	2011
PDGFC	ENST00000502773.1	platelet derived growth factor C	238	1	0	0	1	0	0	0	0	1	mmu-miR-375-3p	-0.2	-0.21	0.35	2005, 2007
MSL2	ENST00000309993.2	male-specific lethal 2 homolog (Drosophila)	175	1	0	0	1	1	0	0	1	1	mmu-miR-375-3p	-0.19	-0.19	0.38	2007
RS1	ENST00000379984.3	retinoschisin 1	5	1	0	0	1	0	0	0	0	1	mmu-miR-375-3p	-0.19	-0.19	0.36	2011
DIAPH2	ENST00000324765.8	diaphanous-related formin 2	91	1	0	0	1	1	0	0	1	0	mmu-miR-375-3p	-0.19	-0.2	0.56	2005, 2007
TSC22D2	ENST00000361875.3	TSC22 domain family, member 2	1062	1	0	0	1	0	0	0	0	3	mmu-miR-375-3p	-0.19	-0.2	0.36	2005, 2007, 2011
SEPHS1	ENST00000545675.1	selenophosphate synthetase 1	281	1	0	0	1	1	0	0	1	1	mmu-miR-375-3p	-0.19	-0.23	0.35
ELAVL2	ENST00000380110.4	ELAV like neuron-specific RNA binding protein 2	78	2	0	0	2	0	0	0	0	1	mmu-miR-375-3p	-0.19	-0.2	0.58	2007, 2009, 2011
PRKD1	ENST00000331968.5	protein kinase D1	75	1	0	0	1	0	0	0	0	1	mmu-miR-375-3p	-0.18	-0.18	0.36	2005, 2007, 2009, 2011
KLLN	ENST00000445946.3	killin, p53-regulated DNA replication inhibitor	5	1	0	0	1	0	0	0	0	1	mmu-miR-375-3p	-0.18	-0.18	0.35	2011
SLC11A2	ENST00000262051.7	solute carrier family 11 (proton-coupled divalent metal ion transporter), member 2	526	1	0	0	1	0	0	0	0	0	mmu-miR-375-3p	-0.17	-0.17	0.36	2011
USP1	ENST00000339950.4	ubiquitin specific peptidase 1	436	1	0	0	1	0	0	0	0	1	mmu-miR-375-3p	-0.17	-0.22	0.36	2005, 2007
CAST	ENST00000395812.2	calpastatin	4674	1	0	0	1	0	0	0	0	1	mmu-miR-375-3p	-0.17	-0.17	0.36	2011
AKIRIN1	ENST00000432648.3	akirin 1	798	1	0	0	1	0	0	0	0	0	mmu-miR-375-3p	-0.17	-0.19	0.35
ERC1	ENST00000355446.5	ELKS/RAB6-interacting/CAST family member 1	159	1	0	0	1	1	0	1	0	3	mmu-miR-375-3p	-0.17	-0.18	0.36	2011
PACSIN1	ENST00000244458.2	protein kinase C and casein kinase substrate in neurons 1	25	1	0	0	1	0	0	0	0	1	mmu-miR-375-3p	-0.17	-0.17	0.35	2005, 2007, 2009, 2011
EIF4G3	ENST00000264211.8	eukaryotic translation initiation factor 4 gamma, 3	48	2	0	0	2	0	0	0	0	1	mmu-miR-375-3p	-0.17	-0.29	0.58	2005, 2007, 2011
LYSMD3	ENST00000509384.1	LysM, putative peptidoglycan-binding, domain containing 3	92	1	0	0	1	0	0	0	0	0	mmu-miR-375-3p	-0.17	-0.17	ORF
ATXN7	ENST00000295900.6	ataxin 7	264	2	0	0	2	0	0	0	0	1	mmu-miR-375-3p	-0.17	-0.18	0.59	2011
CSNK2A1	ENST00000349736.5	casein kinase 2, alpha 1 polypeptide	1927	1	0	0	1	0	0	0	0	1	mmu-miR-375-3p	-0.17	-0.19	0.35	2005, 2007
UBE3A	ENST00000232165.3	ubiquitin protein ligase E3A	529	1	0	0	1	0	0	0	0	0	mmu-miR-375-3p	-0.16	-0.16	0.36	2011
QKI	ENST00000392127.2	QKI, KH domain containing, RNA binding	323	4	0	0	4	3	0	0	3	2	mmu-miR-375-3p	-0.16	-0.35	0.88	2011
RBPJ	ENST00000504907.1	recombination signal binding protein for immunoglobulin kappa J region	70	1	0	0	1	1	0	0	1	2	mmu-miR-375-3p	-0.16	-0.25	0.51
PAX6	ENST00000419022.1	paired box 6	191	1	0	0	1	1	0	0	1	2	mmu-miR-375-3p	-0.16	-0.23	0.37	2007, 2009, 2011
GMFB	ENST00000554908.1	glia maturation factor, beta	15	1	0	0	1	0	0	0	0	1	mmu-miR-375-3p	-0.16	-0.16	0.34	2005, 2007
HOXA3	ENST00000396352.4	homeobox A3	57	1	0	0	1	0	0	0	0	0	mmu-miR-375-3p	-0.16	-0.16	0.36	2005, 2007, 2009, 2011
NR5A2	ENST00000367362.3	nuclear receptor subfamily 5, group A, member 2	121	1	0	0	1	0	0	0	0	3	mmu-miR-375-3p	-0.16	-0.16	0.36	2007, 2011
ASCL1	ENST00000266744.3	achaete-scute complex homolog 1 (Drosophila)	5	1	0	0	1	0	0	0	0	0	mmu-miR-375-3p	-0.16	-0.16	0.36	2007, 2009, 2011
PDE4D	ENST00000340635.6	phosphodiesterase 4D, cAMP-specific	747	2	0	0	2	0	0	0	0	0	mmu-miR-375-3p	-0.15	-0.17	0.58	2005, 2007, 2009, 2011
KLF4	ENST00000374672.4	Kruppel-like factor 4 (gut)	22	1	0	0	1	0	0	0	0	0	mmu-miR-375-3p	-0.15	-0.15	0.36	2005, 2007, 2009, 2011
PIAS1	ENST00000249636.6	protein inhibitor of activated STAT, 1	368	1	0	0	1	0	0	0	0	1	mmu-miR-375-3p	-0.15	-0.17	0.36	2005, 2007, 2011
SYPL2	ENST00000369872.3	synaptophysin-like 2	69	1	0	0	1	0	0	0	0	0	mmu-miR-375-3p	-0.15	-0.15	0.34	2007
CERS6	ENST00000305747.6	ceramide synthase 6	1932	1	0	0	1	0	0	0	0	1	mmu-miR-375-3p	-0.14	-0.14	0.35	2009, 2011
SPAG9	ENST00000262013.7	sperm associated antigen 9	509	1	0	0	1	1	0	0	1	0	mmu-miR-375-3p	-0.14	-0.16	0.36	2005, 2007, 2011
RORB	ENST00000376896.3	RAR-related orphan receptor B	5	2	0	0	2	0	0	0	0	1	mmu-miR-375-3p	-0.14	-0.14	0.58
KCNAB3	ENST00000303790.2	potassium voltage-gated channel, shaker-related subfamily, beta member 3	35	1	0	0	1	0	0	0	0	0	mmu-miR-375-3p	-0.14	-0.14	0.35	2005, 2007
UST	ENST00000367463.4	uronyl-2-sulfotransferase	933	1	0	0	1	0	0	0	0	1	mmu-miR-375-3p	-0.14	-0.15	0.36	2009, 2011
SERBP1	ENST00000370994.4	SERPINE1 mRNA binding protein 1	926	1	0	0	1	0	0	0	0	1	mmu-miR-375-3p	-0.14	-0.14	0.36	2007, 2009, 2011
USP13	ENST00000263966.3	ubiquitin specific peptidase 13 (isopeptidase T-3)	379	1	0	0	1	1	0	0	1	2	mmu-miR-375-3p	-0.14	-0.15	0.34	2011
PITPNA	ENST00000313486.7	phosphatidylinositol transfer protein, alpha	366	1	0	0	1	0	0	0	0	0	mmu-miR-375-3p	-0.14	-0.14	0.35	2005, 2007, 2011
KLF5	ENST00000377687.4	Kruppel-like factor 5 (intestinal)	161	1	0	0	1	0	0	0	0	0	mmu-miR-375-3p	-0.14	-0.14	0.35	2007, 2011
MATR3	ENST00000510056.1	matrin 3	216	1	0	0	1	0	0	0	0	0	mmu-miR-375-3p	-0.14	-0.14	0.36	2011
TMEM26	ENST00000399298.3	transmembrane protein 26	10	1	0	0	1	0	0	0	0	1	mmu-miR-375-3p	-0.14	-0.14	0.35	2011
KIAA1467	ENST00000197268.8	KIAA1467	509	1	0	0	1	0	0	0	0	1	mmu-miR-375-3p	-0.14	-0.14	0.35	2009, 2011
GRIK2	ENST00000413795.1	glutamate receptor, ionotropic, kainate 2	28	1	0	0	1	0	0	0	0	0	mmu-miR-375-3p	-0.14	-0.14	0.35	2009, 2011
HAS2	ENST00000303924.4	hyaluronan synthase 2	398	1	0	0	1	0	0	0	0	0	mmu-miR-375-3p	-0.13	-0.13	0.36	2005, 2007
SENP2	ENST00000296257.5	SUMO1/sentrin/SMT3 specific peptidase 2	1693	1	0	0	1	0	0	0	0	0	mmu-miR-375-3p	-0.13	-0.17	0.36
MAL2	ENST00000276681.6	mal, T-cell differentiation protein 2 (gene/pseudogene)	2056	1	0	0	1	0	0	0	0	0	mmu-miR-375-3p	-0.13	-0.15	0.36	2009, 2011
SOCS5	ENST00000306503.5	suppressor of cytokine signaling 5	72	1	0	0	1	1	0	0	1	0	mmu-miR-375-3p	-0.13	-0.15	0.36	2005, 2007
PDPK1	ENST00000441549.3	3-phosphoinositide dependent protein kinase-1	104	1	0	0	1	1	0	0	1	0	mmu-miR-375-3p	-0.13	-0.14	0.36	2005, 2007, 2009, 2011
EVI5	ENST00000370331.1	ecotropic viral integration site 5	172	1	0	0	1	0	0	0	0	1	mmu-miR-375-3p	-0.13	-0.13	0.36	2009, 2011
ANKHD1	ENST00000360839.2	ankyrin repeat and KH domain containing 1	247	1	0	0	1	0	0	0	0	0	mmu-miR-375-3p	-0.13	-0.13	0.36	2011
CCDC176	ENST00000394009.3	coiled-coil domain containing 176	61	1	0	0	1	0	0	0	0	0	mmu-miR-375-3p	-0.12	-0.12	0.34	2011
LSM12	ENST00000585388.1	LSM12 homolog (S. cerevisiae)	20	1	0	0	1	0	0	0	0	0	mmu-miR-375-3p	-0.12	-0.17	0.34	2007, 2009, 2011
INSM1	ENST00000310227.1	insulinoma-associated 1	20	1	0	0	1	0	0	0	0	0	mmu-miR-375-3p	-0.12	-0.12	0.34	2005, 2007
FOXF1	ENST00000262426.4	forkhead box F1	836	1	0	0	1	0	0	0	0	1	mmu-miR-375-3p	-0.12	-0.21	0.36	2009, 2011
EHMT1	ENST00000460843.1	euchromatic histone-lysine N-methyltransferase 1	22	1	0	0	1	0	0	0	0	0	mmu-miR-375-3p	-0.12	-0.17	0.36	2005, 2007, 2009, 2011
CSRNP2	ENST00000228515.1	cysteine-serine-rich nuclear protein 2	104	1	0	0	1	0	0	0	0	0	mmu-miR-375-3p	-0.12	-0.14	0.35	2009, 2011
RBM24	ENST00000379052.5	RNA binding motif protein 24	43	1	0	1	0	0	0	0	0	0	mmu-miR-375-3p	-0.12	-0.12	< 0.1	2005, 2007, 2009, 2011
DNAJC16	ENST00000375847.3	DnaJ (Hsp40) homolog, subfamily C, member 16	366	1	0	0	1	0	0	0	0	0	mmu-miR-375-3p	-0.12	-0.14	0.36	2007, 2009, 2011
C15orf54	ENST00000318578.3	chromosome 15 open reading frame 54	5	1	0	0	1	0	0	0	0	0	mmu-miR-375-3p	-0.12	-0.12	0.36	2009, 2011
SCN2B	ENST00000278947.5	sodium channel, voltage-gated, type II, beta subunit	5	1	0	0	1	2	0	0	2	0	mmu-miR-375-3p	-0.12	-0.12	0.39	2009, 2011
MAPRE2	ENST00000436190.2	microtubule-associated protein, RP/EB family, member 2	361	1	0	0	1	0	0	0	0	0	mmu-miR-375-3p	-0.12	-0.12	0.35
EIF1	ENST00000469257.1	eukaryotic translation initiation factor 1	415	1	0	0	1	1	0	0	1	1	mmu-miR-375-3p	-0.12	-0.26	0.36	2007, 2011
FRRS1	ENST00000287474.5	ferric-chelate reductase 1	97	1	0	0	1	1	0	0	1	0	mmu-miR-375-3p	-0.12	-0.14	0.35
GPD2	ENST00000540309.1	glycerol-3-phosphate dehydrogenase 2 (mitochondrial)	196	1	0	0	1	0	0	0	0	0	mmu-miR-375-3p	-0.11	-0.11	ORF
RBM47	ENST00000319592.4	RNA binding motif protein 47	264	1	0	0	1	0	0	0	0	0	mmu-miR-375-3p	-0.11	-0.13	0.36	2009, 2011
LGALSL	ENST00000409537.2	lectin, galactoside-binding-like	334	1	0	0	1	0	0	0	0	0	mmu-miR-375-3p	-0.11	-0.22	0.34	2009, 2011
CCDC117	ENST00000249064.4	coiled-coil domain containing 117	211	1	0	0	1	0	0	0	0	0	mmu-miR-375-3p	-0.11	-0.13	0.35	2007, 2009, 2011
EPB41L2	ENST00000531410.1	erythrocyte membrane protein band 4.1-like 2	353	1	0	0	1	0	0	0	0	0	mmu-miR-375-3p	-0.11	-0.11	0.35	2005, 2007
SP1	ENST00000426431.2	Sp1 transcription factor	402	1	0	0	1	0	0	0	0	0	mmu-miR-375-3p	-0.11	-0.11	0.35	2005, 2007, 2009, 2011
RTF1	ENST00000389629.4	Rtf1, Paf1/RNA polymerase II complex component, homolog (S. cerevisiae)	1869	1	0	0	1	0	0	0	0	0	mmu-miR-375-3p	-0.11	-0.12	0.35	2007, 2011
SYTL3	ENST00000367081.3	synaptotagmin-like 3	16	1	0	0	1	1	0	0	1	0	mmu-miR-375-3p	-0.1	-0.39	0.55
TCF4	ENST00000354452.3	transcription factor 4	394	1	0	0	1	1	0	0	1	1	mmu-miR-375-3p	-0.1	-0.12	0.35
HS3ST3B1	ENST00000360954.2	heparan sulfate (glucosamine) 3-O-sulfotransferase 3B1	1489	1	0	0	1	0	0	0	0	1	mmu-miR-375-3p	-0.1	-0.1	0.36
GPR39	ENST00000329321.3	G protein-coupled receptor 39	151	1	0	0	1	0	0	0	0	0	mmu-miR-375-3p	-0.1	-0.1	0.34
LHX9	ENST00000367390.3	LIM homeobox 9	40	1	0	0	1	1	0	0	1	1	mmu-miR-375-3p	-0.1	-0.1	< 0.1
SKI	ENST00000378536.4	v-ski avian sarcoma viral oncogene homolog	613	1	0	0	1	0	0	0	0	1	mmu-miR-375-3p	-0.1	-0.1	0.35	2009, 2011
ATP7A	ENST00000343533.5	ATPase, Cu++ transporting, alpha polypeptide	141	1	0	0	1	0	0	0	0	1	mmu-miR-375-3p	-0.1	-0.1	0.35	2009, 2011
SOCS4	ENST00000395472.2	suppressor of cytokine signaling 4	336	1	0	0	1	1	0	0	1	1	mmu-miR-375-3p	-0.1	-0.17	0.41	2011
SOX21	ENST00000376945.2	SRY (sex determining region Y)-box 21	6	1	0	0	1	0	0	0	0	1	mmu-miR-375-3p	-0.09	-0.11	0.36	2005, 2007, 2009, 2011
ELK4	ENST00000357992.4	ELK4, ETS-domain protein (SRF accessory protein 1)	39	1	0	0	1	0	0	0	0	0	mmu-miR-375-3p	-0.09	-0.12	0.35	2011
ATXN7L1	ENST00000419735.3	ataxin 7-like 1	67	1	0	0	1	0	0	0	0	0	mmu-miR-375-3p	-0.09	-0.1	0.35
SPRY3	ENST00000302805.2	sprouty homolog 3 (Drosophila)	5	1	0	0	1	0	0	0	0	1	mmu-miR-375-3p	-0.09	-0.09	0.35	2011
ZFYVE26	ENST00000347230.4	zinc finger, FYVE domain containing 26	104	1	0	0	1	0	0	0	0	0	mmu-miR-375-3p	-0.09	-0.13	0.36	2009, 2011
MYO9A	ENST00000564571.1	myosin IXA	137	2	0	0	2	1	0	0	1	1	mmu-miR-375-3p	-0.09	-0.15	0.59
BMPR2	ENST00000374574.2	bone morphogenetic protein receptor, type II (serine/threonine kinase)	287	1	0	0	1	1	0	0	1	0	mmu-miR-375-3p	-0.09	-0.16	0.36	2009, 2011
TCF12	ENST00000267811.5	transcription factor 12	101	1	0	0	1	0	0	0	0	0	mmu-miR-375-3p	-0.09	-0.11	0.35	2005, 2007, 2011
PATZ1	ENST00000405309.3	POZ (BTB) and AT hook containing zinc finger 1	165	1	0	0	1	0	0	0	0	0	mmu-miR-375-3p	-0.09	-0.09	ORF
ZFHX4	ENST00000521891.2	zinc finger homeobox 4	194	2	0	0	2	0	0	0	0	0	mmu-miR-375-3p	-0.09	-0.09	0.58	2007, 2009, 2011
CREBZF	ENST00000398294.2	CREB/ATF bZIP transcription factor	1115	1	0	0	1	1	0	0	1	1	mmu-miR-375-3p	-0.08	-0.2	0.39	2007, 2011
TMEM170A	ENST00000357613.4	transmembrane protein 170A	70	1	0	0	1	0	0	0	0	0	mmu-miR-375-3p	-0.08	-0.12	0.35
GPATCH2L	ENST00000553588.1	G patch domain containing 2-like	96	1	0	0	1	0	0	0	0	1	mmu-miR-375-3p	-0.08	-0.09	0.36
DIP2C	ENST00000280886.6	DIP2 disco-interacting protein 2 homolog C (Drosophila)	359	1	0	0	1	1	0	0	1	0	mmu-miR-375-3p	-0.08	-0.1	0.38	2007, 2011
SOX12	ENST00000342665.2	SRY (sex determining region Y)-box 12	6341	1	0	0	1	0	0	0	0	0	mmu-miR-375-3p	-0.07	-0.07	0.36	2005, 2007, 2009, 2011
SGMS1	ENST00000361781.2	sphingomyelin synthase 1	100	1	0	0	1	0	0	0	0	1	mmu-miR-375-3p	-0.07	-0.07	0.34	2007
MBNL3	ENST00000370839.3	muscleblind-like splicing regulator 3	593	1	0	0	1	1	0	0	1	1	mmu-miR-375-3p	-0.07	-0.1	0.36	2011
RP11-1055B8.7	ENST00000307745.7	BAH and coiled-coil domain-containing protein 1	247	1	0	0	1	0	0	0	0	0	mmu-miR-375-3p	-0.07	-0.07	0.36	2011
CORO2A	ENST00000343933.5	coronin, actin binding protein, 2A	493	1	0	0	1	1	0	0	1	2	mmu-miR-375-3p	-0.07	-0.27	0.56	2011
ATG2B	ENST00000359933.4	autophagy related 2B	146	1	0	0	1	0	0	0	0	1	mmu-miR-375-3p	-0.07	-0.07	0.36	2005, 2007, 2009, 2011
TEAD1	ENST00000361905.4	TEA domain family member 1 (SV40 transcriptional enhancer factor)	740	1	0	0	1	2	0	0	2	0	mmu-miR-375-3p	-0.07	-0.07	0.35	2009, 2011
JUND	ENST00000252818.3	jun D proto-oncogene	13688	1	0	0	1	0	0	0	0	0	mmu-miR-375-3p	-0.07	-0.07	0.36	2005, 2007, 2009, 2011
PRPF4B	ENST00000337659.6	pre-mRNA processing factor 4B	602	1	0	0	1	0	0	0	0	1	mmu-miR-375-3p	-0.07	-0.07	0.35	2005, 2007, 2011
SHANK3	ENST00000414786.2	SH3 and multiple ankyrin repeat domains 3	5	1	0	0	1	0	0	0	0	0	mmu-miR-375-3p	-0.07	-0.07	0.35
ARHGAP35	ENST00000404338.3	Rho GTPase activating protein 35	278	1	0	0	1	0	0	0	0	0	mmu-miR-375-3p	-0.07	-0.07	0.35	2009, 2011
GREM2	ENST00000318160.4	gremlin 2, DAN family BMP antagonist	631	1	0	0	1	1	0	0	1	0	mmu-miR-375-3p	-0.07	-0.22	0.36	2005, 2007, 2009, 2011
PHLDA1	ENST00000602540.1	pleckstrin homology-like domain, family A, member 1	3907	1	0	0	1	0	0	0	0	1	mmu-miR-375-3p	-0.07	-0.13	0.36	2007, 2009, 2011
KIAA1199	ENST00000220244.3	KIAA1199	660	1	0	0	1	0	0	0	0	0	mmu-miR-375-3p	-0.07	-0.07	0.35	2011
TMEM65	ENST00000297632.6	transmembrane protein 65	769	1	0	0	1	0	0	0	0	3	mmu-miR-375-3p	-0.07	-0.17	0.36	2007, 2009, 2011
KCNJ3	ENST00000295101.2	potassium inwardly-rectifying channel, subfamily J, member 3	21	1	0	0	1	0	0	0	0	1	mmu-miR-375-3p	-0.07	-0.07	0.35	2005, 2007
HLCS	ENST00000336648.4	holocarboxylase synthetase (biotin-(proprionyl-CoA-carboxylase (ATP-hydrolysing)) ligase)	688	1	0	0	1	0	0	0	0	0	mmu-miR-375-3p	-0.07	-0.07	0.36	2005, 2007, 2009, 2011
CEP41	ENST00000223208.5	centrosomal protein 41kDa	346	2	0	0	2	0	0	0	0	0	mmu-miR-375-3p	-0.06	-0.14	0.58	2007
TIMM8A	ENST00000372902.3	translocase of inner mitochondrial membrane 8 homolog A (yeast)	147	1	0	0	1	0	0	0	0	0	mmu-miR-375-3p	-0.06	-0.21	0.36	2005, 2007
TSC1	ENST00000298552.3	tuberous sclerosis 1	838	1	0	0	1	0	0	0	0	0	mmu-miR-375-3p	-0.06	-0.07	0.36	2011
MIER3	ENST00000381226.3	mesoderm induction early response 1, family member 3	112	1	0	0	1	0	0	0	0	1	mmu-miR-375-3p	-0.06	-0.08	0.34	2007
SRRM3	ENST00000326382.8	serine/arginine repetitive matrix 3	16	1	0	0	1	0	0	0	0	1	mmu-miR-375-3p	-0.06	-0.06	0.35	2011
AEBP2	ENST00000266508.9	AE binding protein 2	1228	1	0	0	1	0	0	0	0	0	mmu-miR-375-3p	-0.06	-0.06	0.36	2005, 2007, 2009, 2011
TRPS1	ENST00000395715.3	trichorhinophalangeal syndrome I	94	1	0	0	1	0	0	0	0	0	mmu-miR-375-3p	-0.06	-0.06	0.36	2005, 2007, 2009, 2011
NLK	ENST00000407008.3	nemo-like kinase	61	1	0	0	1	0	0	0	0	0	mmu-miR-375-3p	-0.06	-0.18	0.35	2005, 2007, 2011
CNIH4	ENST00000465271.1	cornichon family AMPA receptor auxiliary protein 4	1348	1	0	0	1	0	0	0	0	0	mmu-miR-375-3p	-0.06	-0.15	0.36	2007
MBNL1	ENST00000357472.3	muscleblind-like splicing regulator 1	135	1	0	0	1	0	0	0	0	1	mmu-miR-375-3p	-0.06	-0.06	0.36	2005, 2007, 2009, 2011
SETBP1	ENST00000282030.5	SET binding protein 1	77	1	0	0	1	0	0	0	0	0	mmu-miR-375-3p	-0.06	-0.07	0.34
SFXN1	ENST00000321442.5	sideroflexin 1	1018	1	0	0	1	0	0	0	0	0	mmu-miR-375-3p	-0.06	-0.17	0.36
AL117190.3	ENST00000599197.1	Esophagus cancer-related gene-2 interaction susceptibility protein; Uncharacterized protein	30	1	0	0	1	0	0	0	0	0	mmu-miR-375-3p	-0.06	-0.07	0.36
SLC4A4	ENST00000340595.3	solute carrier family 4 (sodium bicarbonate cotransporter), member 4	400	1	0	0	1	1	0	0	1	0	mmu-miR-375-3p	-0.05	-0.06	0.36	2005, 2007, 2009, 2011
INSIG2	ENST00000245787.4	insulin induced gene 2	562	1	0	0	1	0	0	0	0	1	mmu-miR-375-3p	-0.05	-0.18	0.36	2005, 2007, 2009, 2011
POU4F1	ENST00000377208.5	POU class 4 homeobox 1	61	1	0	0	1	1	0	0	1	0	mmu-miR-375-3p	-0.05	-0.12	0.36
UHRF1BP1L	ENST00000279907.7	UHRF1 binding protein 1-like	369	1	0	0	1	0	0	0	0	1	mmu-miR-375-3p	-0.05	-0.09	0.36
GRM5	ENST00000418177.2	glutamate receptor, metabotropic 5	5	1	0	0	1	1	0	0	1	0	mmu-miR-375-3p	-0.05	-0.05	0.36	2011
ATXN1	ENST00000244769.4	ataxin 1	106	1	0	0	1	1	0	0	1	0	mmu-miR-375-3p	-0.05	-0.07	0.36	2005, 2007, 2009, 2011
PLXNA4	ENST00000321063.4	plexin A4	9	1	0	0	1	2	0	0	2	2	mmu-miR-375-3p	-0.05	-0.09	0.38	2009, 2011
NR6A1	ENST00000487099.2	nuclear receptor subfamily 6, group A, member 1	1082	1	0	0	1	0	0	0	0	0	mmu-miR-375-3p	-0.05	-0.05	0.36
SETX	ENST00000224140.5	senataxin	270	1	0	0	1	1	0	0	1	1	mmu-miR-375-3p	-0.05	-0.15	0.34
CASZ1	ENST00000377022.3	castor zinc finger 1	5	1	0	0	1	0	0	0	0	0	mmu-miR-375-3p	-0.05	-0.05	0.36	2007, 2009, 2011
ENAH	ENST00000366844.3	enabled homolog (Drosophila)	415	1	0	0	1	0	0	0	0	1	mmu-miR-375-3p	-0.05	-0.05	0.36	2005, 2007, 2009, 2011
RASD1	ENST00000579152.1	RAS, dexamethasone-induced 1	6	1	0	0	1	0	0	0	0	1	mmu-miR-375-3p	-0.04	-0.21	0.36	2005, 2007, 2009, 2011
SHB	ENST00000377707.3	Src homology 2 domain containing adaptor protein B	1436	1	0	0	1	1	0	0	1	1	mmu-miR-375-3p	-0.04	-0.11	0.36	2007, 2009, 2011
KLF8	ENST00000468660.1	Kruppel-like factor 8	8	1	0	0	1	1	0	0	1	3	mmu-miR-375-3p	-0.04	-0.16	0.35
ZRANB1	ENST00000359653.4	zinc finger, RAN-binding domain containing 1	724	1	0	0	1	0	0	0	0	0	mmu-miR-375-3p	-0.04	-0.1	0.36	2007, 2009, 2011
WNT8B	ENST00000343737.5	wingless-type MMTV integration site family, member 8B	25	1	0	0	1	0	0	0	0	0	mmu-miR-375-3p	-0.03	-0.1	0.36
PURB	ENST00000395699.2	purine-rich element binding protein B	497	1	0	0	1	1	0	0	1	0	mmu-miR-375-3p	-0.03	-0.05	0.37	2005, 2007, 2009, 2011
ARHGEF12	ENST00000397843.2	Rho guanine nucleotide exchange factor (GEF) 12	815	1	0	0	1	1	0	0	1	1	mmu-miR-375-3p	-0.02	-0.04	0.37	2005, 2007, 2009, 2011
SLC7A11	ENST00000280612.5	solute carrier family 7 (anionic amino acid transporter light chain, xc- system), member 11	61	1	0	0	1	1	0	0	1	0	mmu-miR-375-3p	-0.02	-0.09	0.36	2007, 2011
PDK3	ENST00000441463.2	pyruvate dehydrogenase kinase, isozyme 3	659	1	0	0	1	0	0	0	0	3	mmu-miR-375-3p	-0.02	-0.04	0.36	2011
PDE5A	ENST00000354960.3	phosphodiesterase 5A, cGMP-specific	69	1	0	0	1	1	0	0	1	1	mmu-miR-375-3p	-0.02	-0.07	0.36	2007, 2009, 2011
SWAP70	ENST00000318950.6	SWAP switching B-cell complex 70kDa subunit	492	1	0	0	1	0	0	0	0	0	mmu-miR-375-3p	-0.02	-0.15	0.35	2009, 2011
SOX6	ENST00000316399.6	SRY (sex determining region Y)-box 6	22	2	0	0	2	0	0	0	0	0	mmu-miR-375-3p	-0.02	-0.06	0.58	2007, 2009, 2011
GATA6	ENST00000269216.3	GATA binding protein 6	691	1	0	0	1	0	0	0	0	2	mmu-miR-375-3p	-0.02	-0.13	0.36	2005, 2007, 2009, 2011
RBM27	ENST00000265271.5	RNA binding motif protein 27	130	1	0	0	1	0	0	0	0	1	mmu-miR-375-3p	-0.02	-0.03	0.35	2011
CCDC171	ENST00000380701.3	coiled-coil domain containing 171	25	1	0	0	1	0	0	0	0	1	mmu-miR-375-3p	-0.02	-0.03	0.36
CDK5R1	ENST00000313401.3	cyclin-dependent kinase 5, regulatory subunit 1 (p35)	335	1	0	0	1	0	0	0	0	0	mmu-miR-375-3p	-0.02	-0.02	0.34	2009, 2011
BCORL1	ENST00000540052.1	BCL6 corepressor-like 1	209	1	0	1	0	0	0	0	0	1	mmu-miR-375-3p	-0.02	-0.04	< 0.1	2009, 2011
MPP5	ENST00000261681.4	membrane protein, palmitoylated 5 (MAGUK p55 subfamily member 5)	354	1	0	0	1	1	0	0	1	0	mmu-miR-375-3p	-0.01	-0.05	0.35	2005, 2007, 2011
TNPO1	ENST00000337273.5	transportin 1	2041	1	0	0	1	0	0	0	0	2	mmu-miR-375-3p	-0.01	-0.02	0.35	2007
CDC37L1	ENST00000381854.3	cell division cycle 37-like 1	280	1	0	0	1	0	0	0	0	0	mmu-miR-375-3p	-0.01	-0.11	0.34
CPPED1	ENST00000381774.4	calcineurin-like phosphoesterase domain containing 1	511	1	0	0	1	0	0	0	0	0	mmu-miR-375-3p	-0.01	-0.14	0.34	2011
PDE11A	ENST00000286063.6	phosphodiesterase 11A	7	1	0	0	1	0	0	0	0	3	mmu-miR-375-3p	-0.01	-0.01	0.34	2007, 2009
HOXD12	ENST00000404162.2	homeobox D12	6	1	0	0	1	1	0	0	1	0	mmu-miR-375-3p	-0.01	-0.09	0.35
NUFIP2	ENST00000225388.4	nuclear fragile X mental retardation protein interacting protein 2	440	1	0	0	1	2	0	0	2	1	mmu-miR-375-3p	-0.01	-0.07	0.36	2009, 2011
BNC2	ENST00000380672.4	basonuclin 2	770	1	0	0	1	1	0	0	1	1	mmu-miR-375-3p	-0.01	-0.02	0.36	2009, 2011
DLG3	ENST00000194900.4	discs, large homolog 3 (Drosophila)	185	1	0	0	1	0	0	0	0	1	mmu-miR-375-3p	-0.01	-0.01	0.36	2005, 2007, 2009, 2011
ACSL3	ENST00000357430.3	acyl-CoA synthetase long-chain family member 3	2533	1	0	0	1	0	0	0	0	0	mmu-miR-375-3p	-0.01	-0.12	0.36	2005, 2007, 2009, 2011
C7orf60	ENST00000297145.4	chromosome 7 open reading frame 60	39	1	0	0	1	0	0	0	0	1	mmu-miR-375-3p	-0.01	-0.14	0.34	2007, 2009, 2011
PHF15	ENST00000402835.1	PHD finger protein 15	387	1	0	0	1	0	0	0	0	1	mmu-miR-375-3p	-0.01	-0.01	0.36	2009, 2011
ABI2	ENST00000295851.5	abl-interactor 2	877	1	0	0	1	1	0	0	1	5	mmu-miR-375-3p	-0.01	-0.07	0.38
MAP3K1	ENST00000399503.3	mitogen-activated protein kinase kinase kinase 1, E3 ubiquitin protein ligase	137	1	0	0	1	0	0	0	0	0	mmu-miR-375-3p	-0.01	-0.19	0.35
YAP1	ENST00000282441.5	Yes-associated protein 1	1175	1	0	0	1	0	0	0	0	1	mmu-miR-375-3p	-0.01	-0.07	0.34	2005, 2007, 2011
MED13	ENST00000397786.2	mediator complex subunit 13	561	1	0	0	1	0	0	0	0	2	mmu-miR-375-3p	0	-0.04	0.35	2007, 2009, 2011
FTSJ3	ENST00000427159.2	FtsJ homolog 3 (E. coli)	989	1	0	0	1	0	0	0	0	0	mmu-miR-375-3p	0	-0.21	0.36
SLC25A12	ENST00000422440.2	solute carrier family 25 (aspartate/glutamate carrier), member 12	566	1	0	0	1	0	0	0	0	0	mmu-miR-375-3p	0	-0.13	0.35
YWHAB	ENST00000353703.4	tyrosine 3-monooxygenase/tryptophan 5-monooxygenase activation protein, beta polypeptide	272	1	0	0	1	0	0	0	0	0	mmu-miR-375-3p	0	-0.15	0.35
VPS53	ENST00000437048.2	vacuolar protein sorting 53 homolog (S. cerevisiae)	1332	1	0	0	1	0	0	0	0	0	mmu-miR-375-3p	0	-0.01	0.34	2011
GTDC1	ENST00000392869.2	glycosyltransferase-like domain containing 1	241	1	0	0	1	0	0	0	0	2	mmu-miR-375-3p	0	-0.05	0.36
AP5M1	ENST00000261558.3	adaptor-related protein complex 5, mu 1 subunit	198	1	0	0	1	0	0	0	0	1	mmu-miR-375-3p	0	-0.01	0.35
CDKN2C	ENST00000262662.1	cyclin-dependent kinase inhibitor 2C (p18, inhibits CDK4)	708	1	0	0	1	0	0	0	0	0	mmu-miR-375-3p	0	-0.16	0.34
IFT74	ENST00000380062.5	intraflagellar transport 74 homolog (Chlamydomonas)	246	1	0	0	1	0	0	0	0	0	mmu-miR-375-3p	0	-0.18	0.36
CYB5B	ENST00000512062.1	cytochrome b5 type B (outer mitochondrial membrane)	2472	1	0	0	1	1	0	0	1	0	mmu-miR-375-3p	0	-0.29	0.5	2007
IGSF10	ENST00000282466.3	immunoglobulin superfamily, member 10	191	1	0	0	1	1	0	0	1	0	mmu-miR-375-3p	0	-0.06	0.35
EXT2	ENST00000395673.3	exostosin glycosyltransferase 2	896	1	0	0	1	0	0	0	0	1	mmu-miR-375-3p	0	-0.08	0.36
AKAP1	ENST00000337714.3	A kinase (PRKA) anchor protein 1	843	1	0	0	1	0	0	0	0	0	mmu-miR-375-3p	0	-0.11	0.36	2005, 2007
IGFBP4	ENST00000269593.4	insulin-like growth factor binding protein 4	4053	1	0	0	1	0	0	0	0	0	mmu-miR-375-3p	0	-0.11	0.34
ORMDL2	ENST00000243045.5	ORM1-like 2 (S. cerevisiae)	1649	1	0	0	1	0	0	0	0	0	mmu-miR-375-3p	0	-0.17	0.36	2005, 2007, 2009, 2011
NAT10	ENST00000257829.3	N-acetyltransferase 10 (GCN5-related)	132	1	0	0	1	0	0	0	0	0	mmu-miR-375-3p	0	-0.01	0.36
CADM1	ENST00000452722.3	cell adhesion molecule 1	676	1	0	0	1	0	0	0	0	1	mmu-miR-375-3p	0	-0.03	0.36	2011
SOX14	ENST00000306087.1	SRY (sex determining region Y)-box 14	5	1	0	0	1	0	0	0	0	0	mmu-miR-375-3p	0	-0.12	0.35
TBC1D9	ENST00000442267.2	TBC1 domain family, member 9 (with GRAM domain)	200	1	0	0	1	0	0	0	0	0	mmu-miR-375-3p	0	-0.14	0.36	2007
GPM6A	ENST00000280187.7	glycoprotein M6A	335	1	0	0	1	0	0	0	0	1	mmu-miR-375-3p	0	-0.11	0.35
RNF126	ENST00000292363.5	ring finger protein 126	658	1	0	0	1	0	0	0	0	0	mmu-miR-375-3p	0	-0.15	0.35
ZNF8	ENST00000608843.1	zinc finger protein 8	24	1	0	0	1	0	0	0	0	0	mmu-miR-375-3p	0	-0.12	0.34

## Sheet: miR-127-3p
Ortholog of target gene	Representative transcript	Gene name	3P-seq tags + 5	Conserved sites total	Conserved 8mer sites	Conserved 7mer-m8 sites	Conserved 7mer-A1 sites	Poorly conserved sites total	Poorly conserved 8mer sites	Poorly conserved 7mer-m8 sites	Poorly conserved 7mer-A1 sites	6mer sites	Representative miRNA	Cumulative weighted context++ score	Total context++ score	Aggregate PCT	Previous TargetScan publication(s)
SETD8	ENST00000402868.3	SET domain containing (lysine methyltransferase) 8	52	1	1	0	0	0	0	0	0	0	mmu-miR-127-3p	-0.57	-0.57	N/A	2007, 2009, 2011
KIF3B	ENST00000375712.3	kinesin family member 3B	182	1	1	0	0	0	0	0	0	0	mmu-miR-127-3p	-0.54	-0.54	N/A	2007, 2009, 2011
MTSS1L	ENST00000338779.6	metastasis suppressor 1-like	2982	1	1	0	0	0	0	0	0	0	mmu-miR-127-3p	-0.36	-0.36	N/A	2007, 2009, 2011
PKD1	ENST00000262304.4	polycystic kidney disease 1 (autosomal dominant)	14	1	1	0	0	0	0	0	0	0	mmu-miR-127-3p	-0.28	-0.44	N/A	2011
DLK1	ENST00000341267.4	delta-like 1 homolog (Drosophila)	1865	1	1	0	0	0	0	0	0	0	mmu-miR-127-3p	-0.01	-0.5	N/A
SEPT7	ENST00000435235.1	septin 7	97	1	0	1	0	0	0	0	0	0	mmu-miR-127-3p	-0.45	-0.45	N/A	2007
NUDT18	ENST00000521807.2	nudix (nucleoside diphosphate linked moiety X)-type motif 18	40	1	0	1	0	0	0	0	0	0	mmu-miR-127-3p	-0.45	-0.45	N/A
CYB5D1	ENST00000571846.1	cytochrome b5 domain containing 1	546	1	0	1	0	0	0	0	0	0	mmu-miR-127-3p	-0.45	-0.45	N/A
ISCA2	ENST00000554924.1	iron-sulfur cluster assembly 2	135	1	0	0	1	0	0	0	0	0	mmu-miR-127-3p	-0.39	-0.39	N/A
BCAS3	ENST00000589222.1	breast carcinoma amplified sequence 3	339	1	0	1	0	0	0	0	0	0	mmu-miR-127-3p	-0.36	-0.36	N/A	2007
LAS1L	ENST00000312391.8	LAS1-like (S. cerevisiae)	26	1	0	1	0	0	0	0	0	0	mmu-miR-127-3p	-0.35	-0.35	N/A
ZC3H4	ENST00000253048.5	zinc finger CCCH-type containing 4	182	1	0	1	0	0	0	0	0	0	mmu-miR-127-3p	-0.35	-0.35	N/A	2007, 2009, 2011
PSMB5	ENST00000493471.2	proteasome (prosome, macropain) subunit, beta type, 5	156	1	0	1	0	0	0	0	0	0	mmu-miR-127-3p	-0.35	-0.36	N/A
WNT7A	ENST00000285018.4	wingless-type MMTV integration site family, member 7A	5	1	0	1	0	0	0	0	0	0	mmu-miR-127-3p	-0.34	-0.34	N/A
GINS4	ENST00000523277.2	GINS complex subunit 4 (Sld5 homolog)	500	1	0	0	1	0	0	0	0	0	mmu-miR-127-3p	-0.34	-0.34	N/A
RIMS4	ENST00000372851.3	regulating synaptic membrane exocytosis 4	30	1	0	1	0	0	0	0	0	0	mmu-miR-127-3p	-0.34	-0.34	N/A	2007, 2009, 2011
MAPK4	ENST00000592595.1	mitogen-activated protein kinase 4	77	1	0	1	0	0	0	0	0	0	mmu-miR-127-3p	-0.33	-0.33	N/A	2011
ITGA6	ENST00000375221.2	integrin, alpha 6	1328	1	0	1	0	0	0	0	0	0	mmu-miR-127-3p	-0.28	-0.28	N/A
ETNK2	ENST00000367201.3	ethanolamine kinase 2	7	1	0	0	1	0	0	0	0	0	mmu-miR-127-3p	-0.26	-0.26	N/A	2007
RAB37	ENST00000392610.1	RAB37, member RAS oncogene family	875	1	0	0	1	0	0	0	0	0	mmu-miR-127-3p	-0.25	-0.25	N/A
ATP2B2	ENST00000352432.4	ATPase, Ca++ transporting, plasma membrane 2	170	1	0	0	1	1	0	0	1	0	mmu-miR-127-3p	-0.24	-0.4	N/A	2007
CISD1	ENST00000333926.5	CDGSH iron sulfur domain 1	367	1	0	1	0	0	0	0	0	0	mmu-miR-127-3p	-0.14	-0.59	N/A	2011
KLHL14	ENST00000359358.4	kelch-like family member 14	66	1	0	1	0	0	0	0	0	0	mmu-miR-127-3p	-0.05	-0.45	N/A
FMNL3	ENST00000335154.5	formin-like 3	132	1	0	1	0	0	0	0	0	0	mmu-miR-127-3p	-0.04	-0.15	N/A

## Sheet: miR-1a-3p
Ortholog of target gene	Representative transcript	Gene name	3P-seq tags + 5	Conserved sites total	Conserved 8mer sites	Conserved 7mer-m8 sites	Conserved 7mer-A1 sites	Poorly conserved sites total	Poorly conserved 8mer sites	Poorly conserved 7mer-m8 sites	Poorly conserved 7mer-A1 sites	6mer sites	Representative miRNA	Cumulative weighted context++ score	Total context++ score	Aggregate PCT	Previous TargetScan publication(s)
CORO1C	ENST00000261401.3	coronin, actin binding protein, 1C	1970	2	2	0	0	1	0	0	1	0	mmu-miR-206-3p	-1.17	-1.2	0.96	2005, 2007, 2009, 2011
SLC44A1	ENST00000374720.3	solute carrier family 44 (choline transporter), member 1	407	3	2	0	1	0	0	0	0	1	mmu-miR-206-3p	-0.7	-0.7	0.99	2007, 2009, 2011
GJA1	ENST00000282561.3	gap junction protein, alpha 1, 43kDa	1732	2	2	0	0	0	0	0	0	0	mmu-miR-1a-3p	-0.66	-0.66	0.93	2003, 2005, 2007, 2009, 2011
KLF13	ENST00000307145.3	Kruppel-like factor 13	5	2	2	0	0	0	0	0	0	2	mmu-miR-1a-3p	-0.22	-0.22	0.98	2005, 2007, 2009, 2011
FAM168A	ENST00000064778.4	family with sequence similarity 168, member A	68	2	2	0	0	0	0	0	0	0	mmu-miR-1a-3p	-0.18	-0.28	0.9
SPATS2L	ENST00000358677.5	spermatogenesis associated, serine-rich 2-like	3387	3	2	1	0	0	0	0	0	0	mmu-miR-1a-3p	0	-0.37	0.88	2009, 2011
FAM150B	ENST00000403610.4	family with sequence similarity 150, member B	7	1	1	0	0	1	1	0	0	0	mmu-miR-1a-3p	-0.97	-0.97	0.23	2009, 2011
SRI	ENST00000265729.2	sorcin	278	1	1	0	0	1	1	0	0	0	mmu-miR-1a-3p	-0.89	-1.17	0.89	2011
RIT2	ENST00000589109.1	Ras-like without CAAX 2	5	1	1	0	0	0	0	0	0	0	mmu-miR-1a-3p	-0.74	-0.75	0.26	2005, 2007, 2009, 2011
TMSB4X	ENST00000451311.2	thymosin beta 4, X-linked	5	1	1	0	0	0	0	0	0	0	mmu-miR-206-3p	-0.72	-0.72	0.77	2009, 2011
SRSF9	ENST00000229390.3	serine/arginine-rich splicing factor 9	946	1	1	0	0	0	0	0	0	0	mmu-miR-1a-3p	-0.69	-0.69	0.98	2005, 2007, 2009, 2011
NDRG3	ENST00000373803.2	NDRG family member 3	960	1	1	0	0	0	0	0	0	1	mmu-miR-1a-3p	-0.66	-0.67	0.92	2009, 2011
ETS1	ENST00000531611.1	v-ets avian erythroblastosis virus E26 oncogene homolog 1	1423	1	1	0	0	3	1	1	1	0	mmu-miR-206-3p	-0.64	-0.68	0.93	2005, 2007, 2009, 2011
PTPLAD1	ENST00000261875.5	protein tyrosine phosphatase-like A domain containing 1	11697	2	1	1	0	0	0	0	0	0	mmu-miR-206-3p	-0.63	-0.71	0.95	2003, 2007, 2009, 2011
PGRMC1	ENST00000217971.7	progesterone receptor membrane component 1	762	1	1	0	0	0	0	0	0	1	mmu-miR-1a-3p	-0.61	-0.64	0.75	2009, 2011
TPM4	ENST00000300933.4	tropomyosin 4	332	1	1	0	0	2	0	1	1	0	mmu-miR-206-3p	-0.61	-0.71	0.59	2011
IGF1	ENST00000337514.6	insulin-like growth factor 1 (somatomedin C)	19	1	1	0	0	0	0	0	0	2	mmu-miR-1a-3p	-0.61	-0.61	0.92	2005, 2007, 2009, 2011
HNRNPU	ENST00000444376.2	heterogeneous nuclear ribonucleoprotein U (scaffold attachment factor A)	5343	1	1	0	0	0	0	0	0	0	mmu-miR-1a-3p	-0.58	-0.59	0.98	2005, 2007, 2009, 2011
CAAP1	ENST00000520187.1	caspase activity and apoptosis inhibitor 1	1527	1	1	0	0	0	0	0	0	0	mmu-miR-1a-3p	-0.58	-0.59	0.63	2005, 2007, 2009, 2011
E2F5	ENST00000418930.2	E2F transcription factor 5, p130-binding	10	1	1	0	0	0	0	0	0	0	mmu-miR-1a-3p	-0.56	-0.56	0.71	2009, 2011
MMD	ENST00000262065.3	monocyte to macrophage differentiation-associated	558	2	1	0	1	0	0	0	0	0	mmu-miR-1a-3p	-0.54	-0.55	0.9	2005, 2007, 2009, 2011
C12orf4	ENST00000261250.3	chromosome 12 open reading frame 4	37	1	1	0	0	1	0	1	0	1	mmu-miR-1a-3p	-0.54	-0.67	0.38	2009, 2011
SLC6A7	ENST00000524041.1	solute carrier family 6 (neurotransmitter transporter), member 7	5	1	1	0	0	0	0	0	0	0	mmu-miR-1a-3p	-0.53	-0.53	0.43
PPIB	ENST00000300026.3	peptidylprolyl isomerase B (cyclophilin B)	116	1	1	0	0	0	0	0	0	0	mmu-miR-206-3p	-0.53	-0.58	0.48	2011
SMIM14	ENST00000295958.5	small integral membrane protein 14	601	1	1	0	0	0	0	0	0	0	mmu-miR-1a-3p	-0.52	-0.52	0.97	2007, 2009, 2011
ZNF597	ENST00000301744.4	zinc finger protein 597	159	1	1	0	0	1	1	0	0	0	mmu-miR-206-3p	-0.52	-0.54	0.4
UST	ENST00000367463.4	uronyl-2-sulfotransferase	933	2	1	1	0	0	0	0	0	3	mmu-miR-1a-3p	-0.51	-0.65	0.99	2005, 2007, 2009, 2011
TWF1	ENST00000552521.1	twinfilin actin-binding protein 1	72	2	1	0	1	0	0	0	0	0	mmu-miR-1a-3p	-0.51	-0.51	0.88	2011
BSCL2	ENST00000278893.7	Berardinelli-Seip congenital lipodystrophy 2 (seipin)	169	1	1	0	0	0	0	0	0	0	mmu-miR-206-3p	-0.51	-0.51	0.28	2005, 2007, 2009, 2011
TMEM178A	ENST00000281961.2	transmembrane protein 178A	141	1	1	0	0	0	0	0	0	0	mmu-miR-1a-3p	-0.51	-0.51	0.62	2007, 2009, 2011
MAL2	ENST00000276681.6	mal, T-cell differentiation protein 2 (gene/pseudogene)	2056	1	1	0	0	0	0	0	0	0	mmu-miR-206-3p	-0.51	-0.51	0.25	2005, 2007, 2009, 2011
RABEPK	ENST00000394124.4	Rab9 effector protein with kelch motifs	2485	1	1	0	0	0	0	0	0	0	mmu-miR-1a-3p	-0.51	-0.51	ORF
SMARCB1	ENST00000344921.6	SWI/SNF related, matrix associated, actin dependent regulator of chromatin, subfamily b, member 1	1293	1	1	0	0	0	0	0	0	0	mmu-miR-1a-3p	-0.5	-0.51	0.65	2011
TMEM243	ENST00000257637.3	transmembrane protein 243, mitochondrial	25	1	1	0	0	0	0	0	0	0	mmu-miR-1a-3p	-0.5	-0.5	0.56	2005, 2007, 2009, 2011
LPAR5	ENST00000329858.4	lysophosphatidic acid receptor 5	5	1	1	0	0	1	1	0	0	0	mmu-miR-1a-3p	-0.49	-0.49	0.24	2011
EIF1AX	ENST00000379607.5	eukaryotic translation initiation factor 1A, X-linked	277	1	1	0	0	0	0	0	0	1	mmu-miR-1a-3p	-0.49	-0.53	0.92	2005, 2007, 2009, 2011
TMEM257	ENST00000408967.2	transmembrane protein 257	5	1	1	0	0	0	0	0	0	1	mmu-miR-1a-3p	-0.49	-0.49	0.12	2011
ANXA2	ENST00000396024.3	annexin A2	30	1	1	0	0	0	0	0	0	0	mmu-miR-206-3p	-0.49	-0.49	0.84	2005, 2007, 2009, 2011
TSPAN4	ENST00000397396.1	tetraspanin 4	3943	1	1	0	0	0	0	0	0	0	mmu-miR-206-3p	-0.48	-0.48	0.71	2007, 2009, 2011
CCSAP	ENST00000366687.1	centriole, cilia and spindle-associated protein	1210	1	1	0	0	2	1	0	1	3	mmu-miR-206-3p	-0.48	-0.48	0.69	2007, 2009, 2011
ARCN1	ENST00000359415.4	archain 1	1139	1	1	0	0	0	0	0	0	0	mmu-miR-1a-3p	-0.47	-0.47	0.94	2005, 2007, 2009, 2011
NXT2	ENST00000372106.1	nuclear transport factor 2-like export factor 2	390	1	1	0	0	0	0	0	0	0	mmu-miR-1a-3p	-0.47	-0.47	0.48	2009, 2011
TMEM55B	ENST00000250489.4	transmembrane protein 55B	623	1	1	0	0	0	0	0	0	1	mmu-miR-1a-3p	-0.47	-0.47	0.72	2007, 2009, 2011
ELOF1	ENST00000252445.3	elongation factor 1 homolog (S. cerevisiae)	275	1	1	0	0	0	0	0	0	0	mmu-miR-206-3p	-0.47	-0.47	0.37	2007, 2009, 2011
GPR6	ENST00000275169.3	G protein-coupled receptor 6	5	1	1	0	0	0	0	0	0	0	mmu-miR-206-3p	-0.47	-0.47	0.56	2009, 2011
CPLX2	ENST00000359546.4	complexin 2	5	2	1	1	0	0	0	0	0	1	mmu-miR-206-3p	-0.47	-0.47	0.92	2005, 2007, 2009, 2011
RAB43	ENST00000476465.1	RAB43, member RAS oncogene family	5	1	1	0	0	0	0	0	0	0	mmu-miR-1a-3p	-0.47	-0.47	0.73	2009, 2011
EDN1	ENST00000379375.5	endothelin 1	113	1	1	0	0	0	0	0	0	0	mmu-miR-1a-3p	-0.47	-0.47	0.46	2005, 2007, 2009, 2011
AZIN1	ENST00000337198.5	antizyme inhibitor 1	2287	1	1	0	0	0	0	0	0	0	mmu-miR-1a-3p	-0.46	-0.46	0.98	2007, 2009, 2011
ADPGK	ENST00000311669.8	ADP-dependent glucokinase	1938	1	1	0	0	0	0	0	0	0	mmu-miR-1a-3p	-0.46	-0.46	0.92	2005, 2007, 2009, 2011
TIMP3	ENST00000266085.6	TIMP metallopeptidase inhibitor 3	7421	2	1	0	1	0	0	0	0	1	mmu-miR-1a-3p	-0.45	-0.62	0.96	2005, 2007, 2009, 2011
MSANTD2	ENST00000239614.4	Myb/SANT-like DNA-binding domain containing 2	50	1	1	0	0	0	0	0	0	0	mmu-miR-206-3p	-0.45	-0.52	0.82	2007, 2009, 2011
SNAP25	ENST00000254976.2	synaptosomal-associated protein, 25kDa	54	1	1	0	0	0	0	0	0	0	mmu-miR-1a-3p	-0.44	-0.44	0.98	2005, 2007, 2009, 2011
MATR3	ENST00000510056.1	matrin 3	216	1	1	0	0	0	0	0	0	0	mmu-miR-1a-3p	-0.44	-0.47	0.92	2005, 2007, 2009, 2011
PIRT	ENST00000580256.2	phosphoinositide-interacting regulator of transient receptor potential channels	5	1	1	0	0	2	0	2	0	2	mmu-miR-206-3p	-0.44	-0.44	0.88	2009, 2011
MIPOL1	ENST00000327441.7	mirror-image polydactyly 1	45	1	1	0	0	0	0	0	0	1	mmu-miR-206-3p	-0.44	-0.44	0.95	2005, 2007, 2009, 2011
RABGAP1L	ENST00000489615.1	RAB GTPase activating protein 1-like	364	1	1	0	0	1	0	1	0	0	mmu-miR-1a-3p	-0.43	-0.44	0.17
KCNIP3	ENST00000295225.5	Kv channel interacting protein 3, calsenilin	555	1	1	0	0	0	0	0	0	0	mmu-miR-206-3p	-0.43	-0.43	0.88	2007, 2009, 2011
HMCN1	ENST00000367492.2	hemicentin 1	7	1	1	0	0	0	0	0	0	0	mmu-miR-1a-3p	-0.43	-0.43	0.3	2009, 2011
YWHAZ	ENST00000395957.2	tyrosine 3-monooxygenase/tryptophan 5-monooxygenase activation protein, zeta polypeptide	184	1	1	0	0	1	0	0	1	0	mmu-miR-1a-3p	-0.43	-0.43	0.97	2005, 2007, 2009, 2011
ANKRD29	ENST00000592179.1	ankyrin repeat domain 29	60	1	1	0	0	1	1	0	0	0	mmu-miR-206-3p	-0.43	-0.74	0.38	2005, 2007, 2011
SP2	ENST00000376741.4	Sp2 transcription factor	779	1	1	0	0	0	0	0	0	0	mmu-miR-1a-3p	-0.42	-0.43	0.95	2005, 2007, 2009, 2011
OSBPL7	ENST00000007414.3	oxysterol binding protein-like 7	25	1	1	0	0	0	0	0	0	0	mmu-miR-1a-3p	-0.42	-0.42	0.66	2005, 2007, 2009, 2011
AJUBA	ENST00000262713.2	ajuba LIM protein	871	1	1	0	0	0	0	0	0	0	mmu-miR-206-3p	-0.42	-0.42	0.89	2009, 2011
WDR48	ENST00000302313.5	WD repeat domain 48	638	1	1	0	0	0	0	0	0	0	mmu-miR-206-3p	-0.42	-0.42	0.66	2005, 2007, 2009, 2011
CDK6	ENST00000265734.4	cyclin-dependent kinase 6	1116	1	1	0	0	1	1	0	0	3	mmu-miR-1a-3p	-0.41	-0.47	0.85	2007, 2009, 2011
UBE2H	ENST00000355621.3	ubiquitin-conjugating enzyme E2H	855	1	1	0	0	0	0	0	0	0	mmu-miR-206-3p	-0.41	-0.42	0.95	2005, 2007, 2009, 2011
CTTNBP2NL	ENST00000271277.6	CTTNBP2 N-terminal like	182	1	1	0	0	1	0	0	1	0	mmu-miR-206-3p	-0.41	-0.51	0.9	2007, 2009, 2011
SLC10A7	ENST00000264986.3	solute carrier family 10, member 7	77	1	1	0	0	2	0	1	1	3	mmu-miR-206-3p	-0.41	-0.6	0.32	2009, 2011
HOXB4	ENST00000332503.5	homeobox B4	214	1	1	0	0	0	0	0	0	0	mmu-miR-1a-3p	-0.41	-0.41	0.81	2005, 2007, 2009, 2011
CLCN3	ENST00000513761.1	chloride channel, voltage-sensitive 3	1142	1	1	0	0	0	0	0	0	0	mmu-miR-1a-3p	-0.41	-0.41	0.92	2005, 2007, 2009, 2011
HIAT1	ENST00000370152.3	hippocampus abundant transcript 1	1473	1	1	0	0	0	0	0	0	0	mmu-miR-1a-3p	-0.41	-0.41	0.88	2005, 2007, 2009, 2011
FBXO33	ENST00000298097.7	F-box protein 33	306	1	1	0	0	0	0	0	0	0	mmu-miR-1a-3p	-0.41	-0.41	0.83	2005, 2007, 2009, 2011
TPM3	ENST00000368531.2	tropomyosin 3	669	1	1	0	0	0	0	0	0	1	mmu-miR-1a-3p	-0.4	-0.42	0.91	2011
C1GALT1	ENST00000223122.3	core 1 synthase, glycoprotein-N-acetylgalactosamine 3-beta-galactosyltransferase, 1	44	1	1	0	0	0	0	0	0	0	mmu-miR-1a-3p	-0.39	-0.39	0.28	2005, 2007, 2009, 2011
MEOX2	ENST00000262041.5	mesenchyme homeobox 2	5	1	1	0	0	0	0	0	0	0	mmu-miR-1a-3p	-0.39	-0.39	0.48	2005, 2007, 2009, 2011
KCTD13	ENST00000568000.1	potassium channel tetramerization domain containing 13	782	1	1	0	0	0	0	0	0	0	mmu-miR-206-3p	-0.39	-0.39	0.4	2005, 2007, 2009, 2011
SEC63	ENST00000369002.4	SEC63 homolog (S. cerevisiae)	3181	1	1	0	0	0	0	0	0	0	mmu-miR-1a-3p	-0.38	-0.39	0.95	2005, 2007, 2009, 2011
STC2	ENST00000265087.4	stanniocalcin 2	1112	1	1	0	0	0	0	0	0	0	mmu-miR-1a-3p	-0.38	-0.39	0.97	2005, 2007, 2009, 2011
PAX7	ENST00000420770.2	paired box 7	7	4	1	3	0	1	0	0	1	0	mmu-miR-206-3p	-0.38	-0.38	0.96	2011
RNF138	ENST00000261593.3	ring finger protein 138, E3 ubiquitin protein ligase	376	1	1	0	0	0	0	0	0	0	mmu-miR-1a-3p	-0.37	-0.37	0.65	2005, 2007, 2009, 2011
FAM84A	ENST00000295092.2	family with sequence similarity 84, member A	69	1	1	0	0	1	0	0	1	2	mmu-miR-1a-3p	-0.37	-0.37	0.88	2009, 2011
KMT2E	ENST00000334877.4	lysine (K)-specific methyltransferase 2E	654	1	1	0	0	1	0	0	1	0	mmu-miR-1a-3p	-0.37	-0.4	0.96	2005, 2007, 2009, 2011
RASA1	ENST00000456692.2	RAS p21 protein activator (GTPase activating protein) 1	1700	1	1	0	0	0	0	0	0	0	mmu-miR-206-3p	-0.36	-0.36	0.85	2005, 2007, 2009, 2011
TRIM2	ENST00000338700.5	tripartite motif containing 2	22	1	1	0	0	1	0	1	0	1	mmu-miR-1a-3p	-0.36	-0.36	0.8	2005, 2007, 2009, 2011
LRCH1	ENST00000311191.6	leucine-rich repeats and calponin homology (CH) domain containing 1	381	2	1	0	1	0	0	0	0	0	mmu-miR-206-3p	-0.36	-0.36	0.85	2011
SLC30A6	ENST00000282587.5	solute carrier family 30 (zinc transporter), member 6	711	1	1	0	0	0	0	0	0	0	mmu-miR-1a-3p	-0.36	-0.47	0.66	2011
IFT80	ENST00000326448.7	intraflagellar transport 80 homolog (Chlamydomonas)	53	1	1	0	0	0	0	0	0	0	mmu-miR-1a-3p	-0.35	-0.35	0.58	2009, 2011
GPD2	ENST00000540309.1	glycerol-3-phosphate dehydrogenase 2 (mitochondrial)	196	1	1	0	0	0	0	0	0	1	mmu-miR-206-3p	-0.35	-0.35	0.88	2005, 2007, 2009, 2011
FUBP1	ENST00000370767.1	far upstream element (FUSE) binding protein 1	2021	1	1	0	0	0	0	0	0	0	mmu-miR-1a-3p	-0.35	-0.35	0.84	2009, 2011
GCH1	ENST00000491895.2	GTP cyclohydrolase 1	502	1	1	0	0	0	0	0	0	0	mmu-miR-1a-3p	-0.35	-0.35	0.14	2011
PPP4R2	ENST00000356692.5	protein phosphatase 4, regulatory subunit 2	310	1	1	0	0	0	0	0	0	0	mmu-miR-1a-3p	-0.35	-0.35	0.8
BAG4	ENST00000287322.4	BCL2-associated athanogene 4	29	1	1	0	0	1	0	0	1	1	mmu-miR-206-3p	-0.35	-0.36	0.5	2005, 2007, 2011
HELZ2	ENST00000427522.2	helicase with zinc finger 2, transcriptional coactivator	692	1	1	0	0	1	0	1	0	0	mmu-miR-206-3p	-0.33	-0.33	0.67	2005, 2007, 2009, 2011
LPPR4	ENST00000370185.3	Lipid phosphate phosphatase-related protein type 4	5	1	1	0	0	1*	0	0	0	0	mmu-miR-1a-3p	-0.33	-0.33	0.73	2005, 2007, 2009, 2011
CDK14	ENST00000380050.3	cyclin-dependent kinase 14	226	2	1	1	0	0	0	0	0	0	mmu-miR-1a-3p	-0.33	-0.34	0.8	2005, 2007, 2009, 2011
OTX2	ENST00000339475.5	orthodenticle homeobox 2	5	1	1	0	0	0	0	0	0	0	mmu-miR-1a-3p	-0.33	-0.33	0.49	2005, 2007, 2009, 2011
HS3ST3B1	ENST00000360954.2	heparan sulfate (glucosamine) 3-O-sulfotransferase 3B1	1489	1	1	0	0	0	0	0	0	0	mmu-miR-1a-3p	-0.32	-0.32	0.97	2005, 2007, 2009, 2011
FAM73B	ENST00000277475.5	family with sequence similarity 73, member B	651	1	1	0	0	1	0	1	0	0	mmu-miR-1a-3p	-0.32	-0.32	0.15	2009, 2011
STARD7	ENST00000337288.5	StAR-related lipid transfer (START) domain containing 7	17	1	1	0	0	0	0	0	0	0	mmu-miR-206-3p	-0.32	-0.32	0.73	2005, 2007, 2009, 2011
DCAF12L1	ENST00000371126.1	DDB1 and CUL4 associated factor 12-like 1	5	1	1	0	0	0	0	0	0	0	mmu-miR-1a-3p	-0.31	-0.31	0.12	2005, 2007, 2009, 2011
ARL10	ENST00000310389.5	ADP-ribosylation factor-like 10	236	1	1	0	0	0	0	0	0	0	mmu-miR-1a-3p	-0.31	-0.38	0.56	2011
SLC37A3	ENST00000447932.2	solute carrier family 37, member 3	86	1	1	0	0	0	0	0	0	0	mmu-miR-1a-3p	-0.31	-0.31	0.55	2005, 2007, 2009, 2011
DPY19L3	ENST00000586987.1	dpy-19-like 3 (C. elegans)	146	1	1	0	0	1	0	1	0	0	mmu-miR-1a-3p	-0.3	-0.33	< 0.1
NFATC3	ENST00000329524.4	nuclear factor of activated T-cells, cytoplasmic, calcineurin-dependent 3	221	2	1	0	1	0	0	0	0	0	mmu-miR-1a-3p	-0.3	-0.3	0.98	2011
MYOCD	ENST00000425538.1	myocardin	62	3	1	1	1	1	0	1	0	1	mmu-miR-1a-3p	-0.3	-0.39	0.95	2011
SPRED1	ENST00000299084.4	sprouty-related, EVH1 domain containing 1	547	1	1	0	0	1	0	1	0	0	mmu-miR-1a-3p	-0.29	-0.29	0.91	2003, 2005, 2007, 2009, 2011
FOSB	ENST00000592811.1	FBJ murine osteosarcoma viral oncogene homolog B	11	1	1	0	0	0	0	0	0	0	mmu-miR-1a-3p	-0.29	-0.29	0.8	2005, 2007, 2009, 2011
PTPRG	ENST00000474889.1	protein tyrosine phosphatase, receptor type, G	696	2	1	0	1	0	0	0	0	0	mmu-miR-1a-3p	-0.29	-0.3	0.98	2005, 2007, 2009, 2011
SYN3	ENST00000358763.2	synapsin III	5	1	1	0	0	0	0	0	0	1	mmu-miR-1a-3p	-0.28	-0.28	0.16	2011
DNAJC6	ENST00000395325.3	DnaJ (Hsp40) homolog, subfamily C, member 6	96	1	1	0	0	1	0	0	1	0	mmu-miR-1a-3p	-0.28	-0.29	0.4	2009, 2011
UNC119B	ENST00000344651.4	unc-119 homolog B (C. elegans)	5	1	1	0	0	2	0	0	2	0	mmu-miR-1a-3p	-0.27	-0.27	0.55	2007, 2009, 2011
CDC42SE1	ENST00000439374.2	CDC42 small effector 1	231	1	1	0	0	0	0	0	0	0	mmu-miR-1a-3p	-0.27	-0.34	0.46	2009, 2011
GLIS2	ENST00000262366.3	GLIS family zinc finger 2	17	1	1	0	0	0	0	0	0	0	mmu-miR-1a-3p	-0.27	-0.27	0.95	2007, 2009, 2011
CDC42	ENST00000344548.3	cell division cycle 42	34	1	1	0	0	0	0	0	0	0	mmu-miR-206-3p	-0.27	-0.27	0.17	2005, 2007, 2009
MXD1	ENST00000264444.2	MAX dimerization protein 1	183	1	1	0	0	0	0	0	0	1	mmu-miR-1a-3p	-0.26	-0.26	0.93	2009, 2011
SPTLC3	ENST00000399002.2	serine palmitoyltransferase, long chain base subunit 3	24	1	1	0	0	0	0	0	0	0	mmu-miR-1a-3p	-0.26	-0.26	0.41	2007, 2009, 2011
PVRL3	ENST00000319792.3	poliovirus receptor-related 3	361	1	1	0	0	0	0	0	0	0	mmu-miR-1a-3p	-0.26	-0.26	ORF
TSPYL4	ENST00000420283.1	TSPY-like 4	5	1	1	0	0	2	1	0	1	1	mmu-miR-206-3p	-0.26	-0.26	0.81	2005, 2007, 2009, 2011
ALPL	ENST00000374840.3	alkaline phosphatase, liver/bone/kidney	251	1	1	0	0	0	0	0	0	0	mmu-miR-1a-3p	-0.25	-0.25	0.3	2009, 2011
CXCR4	ENST00000409817.1	chemokine (C-X-C motif) receptor 4	14	1	1	0	0	0	0	0	0	1	mmu-miR-1a-3p	-0.25	-0.37	0.13
PAX5	ENST00000358127.4	paired box 5	5	1	1	0	0	1	0	1	0	1	mmu-miR-1a-3p	-0.25	-0.25	0.86
ANKRD34C	ENST00000421388.2	ankyrin repeat domain 34C	5	1	1	0	0	0	0	0	0	1	mmu-miR-1a-3p	-0.25	-0.25	0.77	2011
WDR1	ENST00000499869.2	WD repeat domain 1	8818	1	1	0	0	0	0	0	0	0	mmu-miR-206-3p	-0.25	-0.26	0.91	2005, 2007, 2009, 2011
ATG13	ENST00000359513.4	autophagy related 13	834	1	1	0	0	0	0	0	0	0	mmu-miR-1a-3p	-0.24	-0.24	0.67	2005, 2007, 2009, 2011
DLG4	ENST00000399506.2	discs, large homolog 4 (Drosophila)	75	1	1	0	0	0	0	0	0	0	mmu-miR-1a-3p	-0.24	-0.24	0.56	2005, 2007, 2009, 2011
MPP7	ENST00000375732.1	membrane protein, palmitoylated 7 (MAGUK p55 subfamily member 7)	50	1	1	0	0	1	0	1	0	0	mmu-miR-1a-3p	-0.24	-0.42	0.95	2007, 2009, 2011
EAF1	ENST00000396842.2	ELL associated factor 1	63	1	1	0	0	1	0	0	1	1	mmu-miR-1a-3p	-0.24	-0.25	0.35	2005, 2007, 2011
TACR1	ENST00000305249.5	tachykinin receptor 1	5	1	1	0	0	1	0	1	0	2	mmu-miR-206-3p	-0.24	-0.24	0.2	2009, 2011
COL25A1	ENST00000399132.1	collagen, type XXV, alpha 1	270	1	1	0	0	0	0	0	0	1	mmu-miR-1a-3p	-0.23	-0.31	0.67
RNF165	ENST00000269439.7	ring finger protein 165	18	1	1	0	0	2	0	2	0	0	mmu-miR-1a-3p	-0.23	-0.23	0.83	2007, 2009, 2011
RNF150	ENST00000515673.2	ring finger protein 150	518	1	1	0	0	2	0	1	1	3	mmu-miR-1a-3p	-0.23	-0.28	0.97
RSBN1	ENST00000261441.5	round spermatid basic protein 1	54	1	1	0	0	0	0	0	0	0	mmu-miR-1a-3p	-0.23	-0.23	0.81	2005, 2007, 2009, 2011
GIT1	ENST00000579937.1	G protein-coupled receptor kinase interacting ArfGAP 1	18	1	1	0	0	0	0	0	0	0	mmu-miR-1a-3p	-0.22	-0.22	0.63	2009, 2011
SLC25A25	ENST00000373069.5	solute carrier family 25 (mitochondrial carrier; phosphate carrier), member 25	3454	1	1	0	0	0	0	0	0	1	mmu-miR-1a-3p	-0.22	-0.22	0.89	2005, 2007, 2009, 2011
VAMP4	ENST00000236192.7	vesicle-associated membrane protein 4	282	1	1	0	0	1	0	0	1	0	mmu-miR-1a-3p	-0.21	-0.63	0.95	2005, 2007, 2009, 2011
MNT	ENST00000174618.4	MNT, MAX dimerization protein	146	1	1	0	0	0	0	0	0	0	mmu-miR-1a-3p	-0.21	-0.21	0.68	2005, 2007, 2009, 2011
SEC62	ENST00000337002.4	SEC62 homolog (S. cerevisiae)	746	1	1	0	0	0	0	0	0	0	mmu-miR-1a-3p	-0.21	-0.37	0.98	2005, 2007, 2009, 2011
OLFML2A	ENST00000288815.5	olfactomedin-like 2A	155	1	1	0	0	1	0	0	1	0	mmu-miR-1a-3p	-0.21	-0.21	0.82	2005, 2007, 2009, 2011
PDPN	ENST00000294489.6	podoplanin	264	1	1	0	0	0	0	0	0	0	mmu-miR-1a-3p	-0.21	-0.4	0.41	2009, 2011
SMEK2	ENST00000272313.5	SMEK homolog 2, suppressor of mek1 (Dictyostelium)	342	1	1	0	0	0	0	0	0	0	mmu-miR-1a-3p	-0.21	-0.21	0.8	2011
TNPO2	ENST00000425528.1	transportin 2	1620	1	1	0	0	0	0	0	0	1	mmu-miR-206-3p	-0.2	-0.2	0.78	2005, 2007, 2009, 2011
TMCC1	ENST00000432054.2	transmembrane and coiled-coil domain family 1	97	1	1	0	0	1	0	0	1	0	mmu-miR-1a-3p	-0.2	-0.21	0.89	2005, 2007, 2009, 2011
TGIF2	ENST00000373874.2	TGFB-induced factor homeobox 2	192	1	1	0	0	0	0	0	0	3	mmu-miR-206-3p	-0.2	-0.24	0.69	2005, 2007, 2009, 2011
SLC8A2	ENST00000236877.6	solute carrier family 8 (sodium/calcium exchanger), member 2	5	1	1	0	0	0	0	0	0	0	mmu-miR-1a-3p	-0.2	-0.2	0.84	2005, 2007, 2009, 2011
MON2	ENST00000546600.1	MON2 homolog (S. cerevisiae)	784	1	1	0	0	0	0	0	0	1	mmu-miR-1a-3p	-0.2	-0.56	0.98	2007, 2009, 2011
AVL9	ENST00000318709.4	AVL9 homolog (S. cerevisiase)	246	1	1	0	0	1	0	0	1	2	mmu-miR-206-3p	-0.2	-0.31	0.63
PTPN1	ENST00000371621.3	protein tyrosine phosphatase, non-receptor type 1	142	1	1	0	0	1	0	0	1	2	mmu-miR-206-3p	-0.2	-0.31	0.9	2007, 2009, 2011
KIAA2022	ENST00000055682.6	KIAA2022	5	1	1	0	0	3	0	3	0	0	mmu-miR-1a-3p	-0.2	-0.2	0.92	2003, 2007, 2009, 2011
MAP1A	ENST00000382031.1	microtubule-associated protein 1A	223	1	1	0	0	2	0	0	2	0	mmu-miR-1a-3p	-0.2	-0.2	0.53	2005, 2007, 2009, 2011
SLC39A10	ENST00000409086.3	solute carrier family 39 (zinc transporter), member 10	511	1	1	0	0	2	0	0	2	0	mmu-miR-1a-3p	-0.2	-0.2	0.64	2005, 2007, 2009, 2011
ATF2	ENST00000487334.2	activating transcription factor 2	123	1	1	0	0	0	0	0	0	0	mmu-miR-1a-3p	-0.2	-0.33	0.84
SLC7A2	ENST00000494857.1	solute carrier family 7 (cationic amino acid transporter, y+ system), member 2	1233	1	1	0	0	0	0	0	0	0	mmu-miR-1a-3p	-0.19	-0.2	0.81	2005, 2007, 2009, 2011
SLC35B4	ENST00000378509.4	solute carrier family 35 (UDP-xylose/UDP-N-acetylglucosamine transporter), member B4	899	1	1	0	0	1	1	0	0	0	mmu-miR-206-3p	-0.19	-0.22	< 0.1	2009, 2011
CREB5	ENST00000357727.2	cAMP responsive element binding protein 5	54	1	1	0	0	0	0	0	0	1	mmu-miR-1a-3p	-0.19	-0.33	0.72	2005, 2007, 2009, 2011
ACER2	ENST00000340967.2	alkaline ceramidase 2	44	1	1	0	0	0	0	0	0	0	mmu-miR-1a-3p	-0.19	-0.22	0.7	2009, 2011
SEMA6D	ENST00000355997.3	sema domain, transmembrane domain (TM), and cytoplasmic domain, (semaphorin) 6D	179	1	1	0	0	0	0	0	0	1	mmu-miR-206-3p	-0.19	-0.22	0.76	2005, 2007, 2009, 2011
KCNJ2	ENST00000243457.3	potassium inwardly-rectifying channel, subfamily J, member 2	5	1	1	0	0	0	0	0	0	0	mmu-miR-1a-3p	-0.18	-0.18	0.58	2011
PTPN4	ENST00000263708.2	protein tyrosine phosphatase, non-receptor type 4 (megakaryocyte)	215	2	1	1	0	0	0	0	0	1	mmu-miR-206-3p	-0.18	-0.23	0.91
CAPRIN1	ENST00000341394.4	cell cycle associated protein 1	650	1	1	0	0	1	0	0	1	1	mmu-miR-1a-3p	-0.18	-0.34	0.75	2007, 2009, 2011
FNDC3A	ENST00000492622.2	fibronectin type III domain containing 3A	122	1	1	0	0	0	0	0	0	0	mmu-miR-1a-3p	-0.18	-0.38	0.81	2005, 2007, 2009, 2011
SLC8A1	ENST00000406785.2	solute carrier family 8 (sodium/calcium exchanger), member 1	61	1	1	0	0	2	0	2	0	2	mmu-miR-1a-3p	-0.18	-0.21	0.54	2007, 2009, 2011
C20orf112	ENST00000359676.5	chromosome 20 open reading frame 112	148	1	1	0	0	0	0	0	0	0	mmu-miR-1a-3p	-0.18	-0.27	0.87	2005, 2007, 2009, 2011
ISY1-RAB43	ENST00000418265.1	ISY1-RAB43 readthrough	5	1	1	0	0	0	0	0	0	0	mmu-miR-1a-3p	-0.17	-0.17	0.7	2011
WNT3	ENST00000225512.5	wingless-type MMTV integration site family, member 3	46	1	1	0	0	0	0	0	0	0	mmu-miR-1a-3p	-0.17	-0.17	< 0.1
CREBL2	ENST00000228865.2	cAMP responsive element binding protein-like 2	218	2	1	0	1	0	0	0	0	0	mmu-miR-1a-3p	-0.17	-0.48	0.91	2005, 2007, 2009, 2011
RIMS4	ENST00000372851.3	regulating synaptic membrane exocytosis 4	30	1	1	0	0	0	0	0	0	2	mmu-miR-1a-3p	-0.17	-0.17	0.58	2005, 2007, 2009, 2011
FRS2	ENST00000550389.1	fibroblast growth factor receptor substrate 2	176	1	1	0	0	1	0	1	0	0	mmu-miR-1a-3p	-0.17	-0.37	0.91	2007, 2009, 2011
ZC3H7B	ENST00000352645.4	zinc finger CCCH-type containing 7B	888	1	1	0	0	0	0	0	0	0	mmu-miR-1a-3p	-0.17	-0.17	0.83	2007, 2009, 2011
ATXN1L	ENST00000427980.2	ataxin 1-like	12	1	1	0	0	1	0	0	1	4	mmu-miR-1a-3p	-0.16	-0.16	0.66	2011
JOSD1	ENST00000216039.5	Josephin domain containing 1	24	1	1	0	0	0	0	0	0	0	mmu-miR-206-3p	-0.16	-0.37	0.94	2007, 2009, 2011
KCND3	ENST00000369697.1	potassium voltage-gated channel, Shal-related subfamily, member 3	23	1	1	0	0	0	0	0	0	3	mmu-miR-1a-3p	-0.16	-0.16	0.95
HIVEP3	ENST00000372583.1	human immunodeficiency virus type I enhancer binding protein 3	84	1	1	0	0	0	0	0	0	0	mmu-miR-1a-3p	-0.16	-0.16	0.97
BCL7A	ENST00000538010.1	B-cell CLL/lymphoma 7A	96	1	1	0	0	0	0	0	0	1	mmu-miR-1a-3p	-0.15	-0.2	0.93	2005, 2007, 2009, 2011
ZBTB4	ENST00000380599.4	zinc finger and BTB domain containing 4	1039	1	1	0	0	0	0	0	0	1	mmu-miR-206-3p	-0.15	-0.15	0.73	2005, 2007, 2009, 2011
CD2AP	ENST00000359314.5	CD2-associated protein	145	1	1	0	0	2*	0	0	1	0	mmu-miR-1a-3p	-0.15	-0.48	0.91	2007, 2009, 2011
SETBP1	ENST00000282030.5	SET binding protein 1	77	1	1	0	0	2	0	0	2	0	mmu-miR-206-3p	-0.14	-0.15	0.53	2005, 2007, 2009, 2011
FRAS1	ENST00000264895.6	Fraser syndrome 1	709	1	1	0	0	0	0	0	0	0	mmu-miR-1a-3p	-0.14	-0.14	0.55	2005, 2007, 2009, 2011
G3BP1	ENST00000394123.3	GTPase activating protein (SH3 domain) binding protein 1	688	1	1	0	0	0	0	0	0	2	mmu-miR-206-3p	-0.13	-0.47	0.97
MAP4K3	ENST00000263881.3	mitogen-activated protein kinase kinase kinase kinase 3	796	1	1	0	0	0	0	0	0	0	mmu-miR-1a-3p	-0.13	-0.13	0.62	2005, 2007, 2009, 2011
BSN	ENST00000296452.4	bassoon presynaptic cytomatrix protein	31	2	1	0	1	0	0	0	0	0	mmu-miR-1a-3p	-0.13	-0.13	0.98	2005, 2007, 2009, 2011
ZBTB7A	ENST00000322357.4	zinc finger and BTB domain containing 7A	37	1	1	0	0	0	0	0	0	1	mmu-miR-206-3p	-0.12	-0.18	0.9
PRKCE	ENST00000306156.3	protein kinase C, epsilon	164	1	1	0	0	2	0	1	1	2	mmu-miR-1a-3p	-0.12	-0.12	0.34	2009, 2011
MAPKBP1	ENST00000457542.2	mitogen-activated protein kinase binding protein 1	36	1	1	0	0	1	0	0	1	0	mmu-miR-1a-3p	-0.11	-0.11	0.83	2005, 2007, 2009, 2011
JARID2	ENST00000341776.2	jumonji, AT rich interactive domain 2	199	1	1	0	0	0	0	0	0	0	mmu-miR-206-3p	-0.11	-0.11	0.75	2009, 2011
TADA2B	ENST00000310074.7	transcriptional adaptor 2B	38	1	1	0	0	1	0	1	0	0	mmu-miR-206-3p	-0.11	-0.27	0.15	2009, 2011
HNRNPA3	ENST00000411529.2	heterogeneous nuclear ribonucleoprotein A3	329	1	1	0	0	1	0	0	1	0	mmu-miR-1a-3p	-0.1	-0.41	0.58	2007, 2009, 2011
CAMK1D	ENST00000378847.3	calcium/calmodulin-dependent protein kinase ID	258	1	1	0	0	0	0	0	0	1	mmu-miR-1a-3p	-0.1	-0.23	0.93
MGAT5	ENST00000409645.1	mannosyl (alpha-1,6-)-glycoprotein beta-1,6-N-acetyl-glucosaminyltransferase	1627	1	1	0	0	2	0	2	0	1	mmu-miR-1a-3p	-0.1	-0.1	0.37
UBN1	ENST00000262376.6	ubinuclein 1	586	1	1	0	0	0	0	0	0	0	mmu-miR-1a-3p	-0.09	-0.09	0.61	2005, 2007, 2009, 2011
ZXDB	ENST00000374888.1	zinc finger, X-linked, duplicated B	33	1	1	0	0	3	0	2	1	1	mmu-miR-206-3p	-0.09	-0.24	0.28	2009, 2011
ZNF827	ENST00000379448.4	zinc finger protein 827	17	1	1	0	0	0	0	0	0	1	mmu-miR-1a-3p	-0.09	-0.09	0.83	2005, 2007, 2009, 2011
DSEL	ENST00000310045.7	dermatan sulfate epimerase-like	26	1	1	0	0	0	0	0	0	0	mmu-miR-1a-3p	-0.09	-0.12	0.67	2011
TNKS2	ENST00000371627.4	tankyrase, TRF1-interacting ankyrin-related ADP-ribose polymerase 2	205	2	1	0	1	0	0	0	0	1	mmu-miR-206-3p	-0.09	-0.33	0.98	2005, 2007, 2009, 2011
RALGAPB	ENST00000397038.1	Ral GTPase activating protein, beta subunit (non-catalytic)	1120	1	1	0	0	0	0	0	0	0	mmu-miR-1a-3p	-0.08	-0.1	0.2	2007, 2009, 2011
PLXNA4	ENST00000321063.4	plexin A4	9	1	1	0	0	3	0	2	1	2	mmu-miR-1a-3p	-0.08	-0.1	0.25	2009, 2011
C6orf120	ENST00000332290.2	chromosome 6 open reading frame 120	1415	1	1	0	0	0	0	0	0	1	mmu-miR-1a-3p	-0.08	-0.31	< 0.1
RICTOR	ENST00000357387.3	RPTOR independent companion of MTOR, complex 2	441	1	1	0	0	0	0	0	0	1	mmu-miR-1a-3p	-0.08	-0.08	0.58	2007, 2009, 2011
PAK3	ENST00000372007.5	p21 protein (Cdc42/Rac)-activated kinase 3	8	1	1	0	0	0	0	0	0	1	mmu-miR-1a-3p	-0.08	-0.13	0.9
SMARCC1	ENST00000254480.5	SWI/SNF related, matrix associated, actin dependent regulator of chromatin, subfamily c, member 1	727	1	1	0	0	0	0	0	0	1	mmu-miR-1a-3p	-0.08	-0.12	0.57	2009, 2011
TBX18	ENST00000369663.5	T-box 18	54	1	1	0	0	1	0	0	1	1	mmu-miR-1a-3p	-0.08	-0.11	0.75
SPEG	ENST00000312358.7	SPEG complex locus	179	1	1	0	0	0	0	0	0	0	mmu-miR-1a-3p	-0.07	-0.07	0.9	2009, 2011
RORA	ENST00000335670.6	RAR-related orphan receptor A	102	1	1	0	0	0	0	0	0	1	mmu-miR-206-3p	-0.07	-0.08	0.79	2011
GDAP1L1	ENST00000342560.5	ganglioside induced differentiation associated protein 1-like 1	28	1	1	0	0	0	0	0	0	0	mmu-miR-206-3p	-0.07	-0.43	0.87	2005, 2007, 2009, 2011
TNPO1	ENST00000337273.5	transportin 1	2041	1	1	0	0	1	1	0	0	0	mmu-miR-1a-3p	-0.07	-0.16	0.82	2007, 2009, 2011
KIAA1522	ENST00000401073.2	KIAA1522	13	1	1	0	0	0	0	0	0	0	mmu-miR-206-3p	-0.07	-0.07	0.33	2009, 2011
SULF1	ENST00000458141.2	sulfatase 1	11	1	1	0	0	0	0	0	0	0	mmu-miR-1a-3p	-0.07	-0.07	< 0.1	2007, 2009, 2011
QKI	ENST00000392127.2	QKI, KH domain containing, RNA binding	323	1	1	0	0	0	0	0	0	1	mmu-miR-1a-3p	-0.06	-0.06	0.48	2005, 2007, 2009, 2011
BICD1	ENST00000548411.1	bicaudal D homolog 1 (Drosophila)	205	1	1	0	0	0	0	0	0	0	mmu-miR-1a-3p	-0.06	-0.06	ORF
PURB	ENST00000395699.2	purine-rich element binding protein B	497	1	1	0	0	1	0	1	0	0	mmu-miR-1a-3p	-0.06	-0.13	0.14
GRK6	ENST00000393576.3	G protein-coupled receptor kinase 6	130	1	1	0	0	0	0	0	0	1	mmu-miR-1a-3p	-0.06	-0.27	0.17	2005, 2007, 2009
PAFAH1B1	ENST00000397195.5	platelet-activating factor acetylhydrolase 1b, regulatory subunit 1 (45kDa)	1570	1	1	0	0	0	0	0	0	1	mmu-miR-1a-3p	-0.05	-0.11	0.55	2005, 2007, 2009, 2011
TECPR2	ENST00000359520.7	tectonin beta-propeller repeat containing 2	109	1	1	0	0	1	0	0	1	0	mmu-miR-1a-3p	-0.05	-0.06	0.36	2009, 2011
EFNB2	ENST00000245323.4	ephrin-B2	25	1	1	0	0	0	0	0	0	0	mmu-miR-1a-3p	-0.05	-0.21	0.79	2005, 2007, 2009, 2011
RNF213	ENST00000582970.1	ring finger protein 213	630	1	1	0	0	0	0	0	0	0	mmu-miR-1a-3p	-0.05	-0.17	0.35	2009
CTNND1	ENST00000524630.1	catenin (cadherin-associated protein), delta 1	743	1	1	0	0	0	0	0	0	0	mmu-miR-1a-3p	-0.04	-0.04	0.62	2009, 2011
PEAK1	ENST00000312493.4	pseudopodium-enriched atypical kinase 1	209	1	1	0	0	1	0	1	0	0	mmu-miR-1a-3p	-0.04	-0.05	0.49	2009, 2011
DBP	ENST00000222122.5	D site of albumin promoter (albumin D-box) binding protein	38	1	1	0	0	0	0	0	0	0	mmu-miR-1a-3p	-0.04	-0.37	0.18
UBE4A	ENST00000252108.3	ubiquitination factor E4A	29	1	1	0	0	0	0	0	0	0	mmu-miR-1a-3p	-0.04	-0.17	0.78	2005, 2007, 2009, 2011
PDE7A	ENST00000401827.3	phosphodiesterase 7A	84	1	1	0	0	0	0	0	0	0	mmu-miR-1a-3p	-0.03	-0.4	0.98	2011
FN1	ENST00000357009.2	fibronectin 1	1064	1	1	0	0	0	0	0	0	0	mmu-miR-1a-3p	-0.03	-0.18	0.2	2005, 2007, 2011
PREX1	ENST00000396220.1	phosphatidylinositol-3,4,5-trisphosphate-dependent Rac exchange factor 1	14	1	1	0	0	0	0	0	0	0	mmu-miR-1a-3p	-0.03	-0.03	0.84	2005, 2007, 2009, 2011
WIPF2	ENST00000323571.4	WAS/WASL interacting protein family, member 2	214	1	1	0	0	0	0	0	0	2	mmu-miR-1a-3p	-0.03	-0.16	0.82	2007, 2009, 2011
FNDC3B	ENST00000336824.4	fibronectin type III domain containing 3B	509	1	1	0	0	0	0	0	0	1	mmu-miR-206-3p	-0.03	-0.28	0.83	2005, 2007, 2009, 2011
DONSON	ENST00000453626.1	downstream neighbor of SON	103	1	1	0	0	0	0	0	0	0	mmu-miR-1a-3p	-0.03	-0.42	0.87
PPM1L	ENST00000498165.1	protein phosphatase, Mg2+/Mn2+ dependent, 1L	59	1	1	0	0	0	0	0	0	0	mmu-miR-1a-3p	-0.02	-0.23	0.45
ALX1	ENST00000316824.3	ALX homeobox 1	37	2	1	1	0	0	0	0	0	1	mmu-miR-206-3p	-0.01	-0.4	0.97
TMEM120B	ENST00000449592.2	transmembrane protein 120B	60	1	1	0	0	2	0	1	1	1	mmu-miR-1a-3p	-0.01	-0.16	< 0.1
C2orf68	ENST00000306336.5	chromosome 2 open reading frame 68	565	1	1	0	0	0	0	0	0	1	mmu-miR-1a-3p	-0.01	-0.38	0.29	2011
KCTD10	ENST00000228495.6	potassium channel tetramerization domain containing 10	147	1	1	0	0	0	0	0	0	0	mmu-miR-1a-3p	-0.01	-0.23	0.8	2009, 2011
TNFAIP8	ENST00000504771.2	tumor necrosis factor, alpha-induced protein 8	608	1	1	0	0	0	0	0	0	0	mmu-miR-206-3p	-0.01	-0.19	0.44
HIC2	ENST00000407464.2	hypermethylated in cancer 2	28	1	1	0	0	0	0	0	0	0	mmu-miR-1a-3p	-0.01	-0.03	0.84	2005, 2007, 2009, 2011
YWHAB	ENST00000353703.4	tyrosine 3-monooxygenase/tryptophan 5-monooxygenase activation protein, beta polypeptide	272	1	1	0	0	0	0	0	0	0	mmu-miR-1a-3p	-0.01	-0.32	0.73	2009, 2011
NRP1	ENST00000374875.1	neuropilin 1	586	1	1	0	0	0	0	0	0	0	mmu-miR-1a-3p	0	-0.22	0.84	2005, 2007, 2009, 2011
MYLK	ENST00000360772.3	myosin light chain kinase	2964	1	1	0	0	0	0	0	0	0	mmu-miR-1a-3p	0	-0.24	0.87	2005, 2007, 2009, 2011
KIAA1462	ENST00000375377.1	KIAA1462	360	1	1	0	0	0	0	0	0	0	mmu-miR-1a-3p	0	-0.33	0.17	2011
PHAX	ENST00000297540.4	phosphorylated adaptor for RNA export	309	1	1	0	0	0	0	0	0	0	mmu-miR-1a-3p	0	-0.63	0.93	2007, 2009, 2011
DNMT3A	ENST00000380746.4	DNA (cytosine-5-)-methyltransferase 3 alpha	221	1	1	0	0	0	0	0	0	1	mmu-miR-1a-3p	0	-0.03	0.89
POLDIP2	ENST00000540200.1	polymerase (DNA-directed), delta interacting protein 2	4344	1	1	0	0	0	0	0	0	0	mmu-miR-1a-3p	0	-0.25	0.1
NT5C2	ENST00000343289.5	5'-nucleotidase, cytosolic II	468	1	1	0	0	0	0	0	0	1	mmu-miR-1a-3p	0	-0.21	0.15	2011
NINJ1	ENST00000375446.4	ninjurin 1	1216	1	1	0	0	0	0	0	0	0	mmu-miR-1a-3p	0	-0.23	0.2	2011
SRC	ENST00000373578.2	v-src avian sarcoma (Schmidt-Ruppin A-2) viral oncogene homolog	170	1	1	0	0	0	0	0	0	0	mmu-miR-206-3p	0	-0.05	0.2	2009, 2011
TRA2B	ENST00000453386.2	transformer 2 beta homolog (Drosophila)	1868	1	1	0	0	0	0	0	0	0	mmu-miR-1a-3p	0	-0.4	0.54	2005, 2007, 2009, 2011
SMIM2	ENST00000400419.1	small integral membrane protein 2	5	1	1	0	0	0	0	0	0	0	mmu-miR-1a-3p	0	-0.5	0.56
HMGCR	ENST00000287936.4	3-hydroxy-3-methylglutaryl-CoA reductase	1385	1	1	0	0	0	0	0	0	0	mmu-miR-1a-3p	0	-0.16	0.85	2005, 2007, 2009, 2011
NCL	ENST00000322723.4	nucleolin	10100	1	1	0	0	0	0	0	0	0	mmu-miR-1a-3p	0	-0.63	0.98	2005, 2007, 2009, 2011
ABI2	ENST00000295851.5	abl-interactor 2	877	1	1	0	0	1	0	1	0	2	mmu-miR-1a-3p	0	-0.05	0.79
BRIX1	ENST00000336767.5	BRX1, biogenesis of ribosomes, homolog (S. cerevisiae)	1809	1	1	0	0	0	0	0	0	0	mmu-miR-1a-3p	0	-0.44	0.41
ITGB1BP1	ENST00000360635.3	integrin beta 1 binding protein 1	14310	1	1	0	0	0	0	0	0	2	mmu-miR-1a-3p	0	-0.3	0.87
SERP1	ENST00000239944.2	stress-associated endoplasmic reticulum protein 1	3242	3	0	0	3	1	0	1	0	1	mmu-miR-1a-3p	-0.9	-1.09	0.97	2005, 2007, 2009, 2011
CXCL11	ENST00000306621.3	chemokine (C-X-C motif) ligand 11	5	1	0	1	0	1	0	1	0	0	mmu-miR-1a-3p	-0.68	-0.68	0.57	2011
CITED2	ENST00000367651.2	Cbp/p300-interacting transactivator, with Glu/Asp-rich carboxy-terminal domain, 2	1071	1	0	1	0	1	1	0	0	0	mmu-miR-206-3p	-0.68	-0.76	0.71	2007, 2009, 2011
DGKE	ENST00000284061.3	diacylglycerol kinase, epsilon 64kDa	470	1	0	1	0	3	1	1	1	0	mmu-miR-206-3p	-0.65	-0.82	0.48	2011
ABHD2	ENST00000352732.5	abhydrolase domain containing 2	210	1	0	1	0	3	0	2	1	0	mmu-miR-206-3p	-0.63	-0.68	0.91	2007, 2009, 2011
G6PD	ENST00000393562.2	glucose-6-phosphate dehydrogenase	9	2	0	2	0	0	0	0	0	0	mmu-miR-1a-3p	-0.6	-0.6	0.96	2011
BDNF	ENST00000439476.2	brain-derived neurotrophic factor	2696	3	0	3	0	0	0	0	0	0	mmu-miR-1a-3p	-0.6	-0.78	0.99	2003, 2005, 2007, 2009, 2011
MMD2	ENST00000406755.1	monocyte to macrophage differentiation-associated 2	5	1	0	0	1	1	1	0	0	1	mmu-miR-1a-3p	-0.55	-0.55	0.67	2005, 2007, 2009
PAX3	ENST00000350526.4	paired box 3	7	2	0	2	0	0	0	0	0	0	mmu-miR-206-3p	-0.5	-0.5	0.86	2005, 2007, 2009, 2011
AP1G1	ENST00000299980.4	adaptor-related protein complex 1, gamma 1 subunit	436	1	0	1	0	1	0	1	0	2	mmu-miR-1a-3p	-0.48	-0.5	0.33	2005, 2007
BRI3BP	ENST00000341446.8	BRI3 binding protein	820	1	0	1	0	3	0	2	1	4	mmu-miR-1a-3p	-0.48	-0.56	0.81
PDCD10	ENST00000392750.2	programmed cell death 10	638	1	0	1	0	0	0	0	0	0	mmu-miR-1a-3p	-0.47	-0.49	0.78	2005, 2007, 2009, 2011
TAGLN2	ENST00000368096.1	transgelin 2	2192	1	0	1	0	0	0	0	0	2	mmu-miR-1a-3p	-0.45	-0.45	0.72	2005, 2007, 2009, 2011
AP1S1	ENST00000337619.5	adaptor-related protein complex 1, sigma 1 subunit	750	1	0	1	0	1	1	0	0	0	mmu-miR-1a-3p	-0.45	-0.9	0.83	2011
VAMP2	ENST00000404970.3	vesicle-associated membrane protein 2 (synaptobrevin 2)	1840	2	0	2	0	0	0	0	0	0	mmu-miR-206-3p	-0.44	-0.45	0.82	2003, 2005, 2007, 2009, 2011
TPPP	ENST00000360578.5	tubulin polymerization promoting protein	7	1	0	1	0	1	0	0	1	1	mmu-miR-206-3p	-0.42	-0.42	0.8	2005, 2007, 2009, 2011
C5orf51	ENST00000381647.2	chromosome 5 open reading frame 51	124	2	0	2	0	1	0	0	1	0	mmu-miR-1a-3p	-0.42	-0.42	0.83	2005, 2007, 2009, 2011
DDX5	ENST00000225792.5	DEAD (Asp-Glu-Ala-Asp) box helicase 5	5537	1	0	1	0	0	0	0	0	1	mmu-miR-1a-3p	-0.42	-0.45	0.84	2005, 2007, 2009, 2011
YWHAQ	ENST00000381844.4	tyrosine 3-monooxygenase/tryptophan 5-monooxygenase activation protein, theta polypeptide	473	1	0	1	0	0	0	0	0	1	mmu-miR-1a-3p	-0.41	-0.41	0.47	2005, 2007
CNN3	ENST00000370206.4	calponin 3, acidic	4490	1	0	1	0	0	0	0	0	0	mmu-miR-1a-3p	-0.41	-0.41	0.74	2005, 2007, 2009, 2011
RSPO3	ENST00000356698.4	R-spondin 3	118	1	0	1	0	0	0	0	0	1	mmu-miR-1a-3p	-0.41	-0.43	0.84	2007, 2009, 2011
C15orf54	ENST00000318578.3	chromosome 15 open reading frame 54	5	1	0	0	1	1	0	0	1	0	mmu-miR-206-3p	-0.41	-0.41	0.83	2009, 2011
KIF2A	ENST00000381103.2	kinesin heavy chain member 2A	905	2	0	1	1	0	0	0	0	0	mmu-miR-1a-3p	-0.4	-0.42	0.95	2007, 2009, 2011
TRAPPC4	ENST00000533632.1	trafficking protein particle complex 4	649	1	0	1	0	0	0	0	0	0	mmu-miR-1a-3p	-0.4	-0.42	0.27
RRBP1	ENST00000377813.1	ribosome binding protein 1	1290	1	0	1	0	0	0	0	0	0	mmu-miR-1a-3p	-0.4	-0.4	0.82	2005, 2007, 2009, 2011
ZNF580	ENST00000325333.5	zinc finger protein 580	154	1	0	1	0	0	0	0	0	0	mmu-miR-1a-3p	-0.39	-0.41	0.76	2005, 2007, 2009, 2011
MCTP1	ENST00000515393.1	multiple C2 domains, transmembrane 1	81	1	0	0	1	2	0	1	1	1	mmu-miR-1a-3p	-0.39	-0.45	0.68	2011
POGK	ENST00000367875.1	pogo transposable element with KRAB domain	377	1	0	1	0	0	0	0	0	2	mmu-miR-1a-3p	-0.38	-0.49	0.83	2007, 2009, 2011
KLHL5	ENST00000261425.3	kelch-like family member 5	366	2	0	1	1	1	0	0	1	0	mmu-miR-206-3p	-0.37	-0.45	0.92	2011
CHSY1	ENST00000254190.3	chondroitin sulfate synthase 1	200	2	0	2	0	0	0	0	0	0	mmu-miR-1a-3p	-0.37	-0.43	0.89
EPB41L2	ENST00000531410.1	erythrocyte membrane protein band 4.1-like 2	353	1	0	0	1	1	0	0	1	0	mmu-miR-1a-3p	-0.37	-0.37	0.71
KTN1	ENST00000416613.1	kinectin 1 (kinesin receptor)	469	1	0	1	0	0	0	0	0	0	mmu-miR-1a-3p	-0.37	-0.37	0.78	2005, 2007, 2009, 2011
NAP1L5	ENST00000323061.5	nucleosome assembly protein 1-like 5	28	1	0	1	0	1*	0	0	0	0	mmu-miR-1a-3p	-0.36	-0.36	0.31	2005, 2007, 2009, 2011
BET1	ENST00000222547.3	Bet1 golgi vesicular membrane trafficking protein	722	1	0	1	0	0	0	0	0	0	mmu-miR-1a-3p	-0.36	-0.43	0.64	2005, 2007, 2009, 2011
GLCCI1	ENST00000223145.5	glucocorticoid induced transcript 1	654	2	0	1	1	0	0	0	0	0	mmu-miR-1a-3p	-0.36	-0.41	0.96	2005, 2007
RCAN3	ENST00000374395.4	RCAN family member 3	395	1	0	1	0	1	0	1	0	0	mmu-miR-1a-3p	-0.36	-0.49	0.45
XPO6	ENST00000565698.1	exportin 6	413	1	0	0	1	1	0	0	1	0	mmu-miR-1a-3p	-0.35	-0.36	0.85	2005, 2007, 2009, 2011
GCLC	ENST00000229416.6	glutamate-cysteine ligase, catalytic subunit	1001	1	0	0	1	1	0	0	1	0	mmu-miR-1a-3p	-0.35	-0.36	0.68	2005, 2007, 2009, 2011
DHX15	ENST00000336812.4	DEAH (Asp-Glu-Ala-His) box helicase 15	1050	1	0	1	0	0	0	0	0	0	mmu-miR-1a-3p	-0.35	-0.35	0.79	2005, 2007, 2009, 2011
SNAI2	ENST00000020945.1	snail family zinc finger 2	1233	1	0	1	0	0	0	0	0	0	mmu-miR-1a-3p	-0.35	-0.35	0.72	2009, 2011
MAB21L1	ENST00000379919.4	mab-21-like 1 (C. elegans)	25	1	0	1	0	0	0	0	0	0	mmu-miR-1a-3p	-0.35	-0.35	0.79	2005, 2007, 2009, 2011
USP33	ENST00000370794.3	ubiquitin specific peptidase 33	287	1	0	1	0	0	0	0	0	0	mmu-miR-206-3p	-0.35	-0.35	0.82	2005, 2007, 2009, 2011
GPR125	ENST00000334304.5	G protein-coupled receptor 125	1042	1	0	1	0	0	0	0	0	0	mmu-miR-1a-3p	-0.34	-0.34	0.84	2005, 2007, 2009, 2011
KALRN	ENST00000393496.1	kalirin, RhoGEF kinase	83	1	0	1	0	0	0	0	0	0	mmu-miR-1a-3p	-0.34	-0.34	0.78
ENY2	ENST00000520147.1	enhancer of yellow 2 homolog (Drosophila)	1814	1	0	1	0	0	0	0	0	0	mmu-miR-1a-3p	-0.34	-0.34	ORF
SNX25	ENST00000504273.1	sorting nexin 25	21	1	0	1	0	0	0	0	0	0	mmu-miR-1a-3p	-0.34	-0.34	0.58
THBS1	ENST00000260356.5	thrombospondin 1	46844	1	0	1	0	0	0	0	0	3	mmu-miR-1a-3p	-0.34	-0.36	0.84	2009, 2011
FAM155A	ENST00000375915.2	family with sequence similarity 155, member A	118	1	0	1	0	0	0	0	0	0	mmu-miR-206-3p	-0.34	-0.34	0.76	2007, 2009, 2011
GATA6	ENST00000269216.3	GATA binding protein 6	691	1	0	1	0	0	0	0	0	2	mmu-miR-206-3p	-0.34	-0.34	0.76
SH3BGRL3	ENST00000319041.6	SH3 domain binding glutamic acid-rich protein like 3	8719	1	0	1	0	0	0	0	0	1	mmu-miR-206-3p	-0.34	-0.38	0.68	2005, 2007, 2009, 2011
MET	ENST00000397752.3	met proto-oncogene	1155	2	0	2	0	0	0	0	0	0	mmu-miR-1a-3p	-0.34	-0.34	0.62	2011
CPEB1	ENST00000450751.2	cytoplasmic polyadenylation element binding protein 1	5	1	0	1	0	0	0	0	0	0	mmu-miR-1a-3p	-0.33	-0.33	0.77	2005, 2007, 2009, 2011
KANK4	ENST00000317477.4	KN motif and ankyrin repeat domains 4	80	1	0	1	0	0	0	0	0	2	mmu-miR-1a-3p	-0.32	-0.41	0.83	2007, 2009, 2011
HSPD1	ENST00000388968.3	heat shock 60kDa protein 1 (chaperonin)	42	1	0	1	0	0	0	0	0	0	mmu-miR-1a-3p	-0.32	-0.37	0.84	2005, 2007, 2009, 2011
EML3	ENST00000394773.2	echinoderm microtubule associated protein like 3	48	1	0	1	0	0	0	0	0	0	mmu-miR-1a-3p	-0.32	-0.32	ORF	2007, 2009, 2011
PLA2G4A	ENST00000367466.3	phospholipase A2, group IVA (cytosolic, calcium-dependent)	75	1	0	1	0	0	0	0	0	0	mmu-miR-1a-3p	-0.32	-0.48	0.8	2009, 2011
ARF3	ENST00000256682.4	ADP-ribosylation factor 3	1093	1	0	0	1	1	0	1	0	3	mmu-miR-206-3p	-0.32	-0.38	0.69	2005, 2007, 2009, 2011
WDR61	ENST00000558311.1	WD repeat domain 61	1987	1	0	1	0	0	0	0	0	0	mmu-miR-1a-3p	-0.32	-0.32	0.27	2007
BPNT1	ENST00000322067.7	3'(2'), 5'-bisphosphate nucleotidase 1	201	1	0	1	0	0	0	0	0	0	mmu-miR-1a-3p	-0.32	-0.32	0.81	2005, 2007, 2009, 2011
SYT1	ENST00000457153.2	synaptotagmin I	13	2	0	0	2	1	0	1	0	2	mmu-miR-206-3p	-0.31	-0.31	0.89	2005, 2007, 2009, 2011
SLC20A1	ENST00000272542.3	solute carrier family 20 (phosphate transporter), member 1	205	1	0	1	0	1	0	0	1	0	mmu-miR-1a-3p	-0.31	-0.31	0.29
PIK3C2A	ENST00000265970.7	phosphatidylinositol-4-phosphate 3-kinase, catalytic subunit type 2 alpha	280	2	0	0	2	0	0	0	0	0	mmu-miR-1a-3p	-0.31	-0.36	0.88	2009, 2011
NCK2	ENST00000451463.2	NCK adaptor protein 2	178	1	0	1	0	1*	0	0	0	0	mmu-miR-1a-3p	-0.31	-0.32	0.62	2005, 2007, 2009, 2011
CERS2	ENST00000368954.5	ceramide synthase 2	4620	1	0	1	0	0	0	0	0	1	mmu-miR-206-3p	-0.31	-0.31	0.68	2009, 2011
CLTC	ENST00000269122.3	clathrin, heavy chain (Hc)	10702	2	0	1	1	1	0	1	0	0	mmu-miR-1a-3p	-0.3	-0.41	0.95	2005, 2007, 2009, 2011
HNRNPK	ENST00000376281.4	heterogeneous nuclear ribonucleoprotein K	124	1	0	1	0	0	0	0	0	0	mmu-miR-1a-3p	-0.3	-0.3	0.84	2005, 2007, 2009, 2011
TDP1	ENST00000393452.3	tyrosyl-DNA phosphodiesterase 1	1031	1	0	1	0	0	0	0	0	1	mmu-miR-1a-3p	-0.3	-0.35	< 0.1
SLC35F1	ENST00000360388.4	solute carrier family 35, member F1	56	1	0	1	0	0	0	0	0	0	mmu-miR-1a-3p	-0.3	-0.3	0.78	2007, 2009, 2011
BCL2L2	ENST00000250405.5	BCL2-like 2	1380	1	0	1	0	1	0	0	1	1	mmu-miR-1a-3p	-0.3	-0.3	0.37
YIPF5	ENST00000274496.5	Yip1 domain family, member 5	594	1	0	1	0	0	0	0	0	1	mmu-miR-1a-3p	-0.3	-0.3	0.34	2011
LCOR	ENST00000371103.3	ligand dependent nuclear receptor corepressor	94	2	0	2	0	0	0	0	0	0	mmu-miR-1a-3p	-0.3	-0.36	0.93	2011
[truncated: 345 more rows]

## Sheet: miR-143-3p
Ortholog of target gene	Representative transcript	Gene name	3P-seq tags + 5	Conserved sites total	Conserved 8mer sites	Conserved 7mer-m8 sites	Conserved 7mer-A1 sites	Poorly conserved sites total	Poorly conserved 8mer sites	Poorly conserved 7mer-m8 sites	Poorly conserved 7mer-A1 sites	6mer sites	Representative miRNA	Cumulative weighted context++ score	Total context++ score	Aggregate PCT	Previous TargetScan publication(s)
[truncated: 332 more rows]

[truncated: 1 more sheets: miR-145-5p]
