# Supplementary material for: Dysregulation of miR-1-3p: An Early Event in Colitis-Associated Dysplasia
Source: Int J Mol Sci. 2022 Oct 27;23(21):13024. doi: 10.3390/ijms232113024 (PMC9657954; doi:10.3390/ijms232113024)
Supplement: Supplementary file 1 [file ijms-23-13024-s001.zip › Supplementary Data S4 - Fragoso et al - Adjacency_Matrix _between_miRs_and_targets.xlsx]

## Sheet: AdjacencyMatrix
	mmu-miR-31-5p	mmu-miR-205-5p	mmu-miR-133a-3p	mmu-miR-30c-5p	mmu-miR-375-3p	mmu-miR-1a-3p	mmu-miR-143-3p	mmu-miR-145a-5p	sums
TMOD3	0	0	1	1	0	0	0	1	3
SCN2B	0	0	1	0	1	0	1	0	3
TNS1	1	1	0	0	0	0	0	0	2
CASD1	1	1	0	0	0	0	0	0	2
GCH1	0	0	1	0	0	1	0	0	2
TCF7	0	0	1	1	0	0	0	0	2
SOX9	0	0	0	1	0	0	0	1	2
STC1	0	0	0	1	0	0	0	1	2
MAP4K4	0	0	0	1	0	0	0	1	2
ELAVL2	0	0	0	1	1	0	0	0	2
ARF4	0	0	0	1	0	1	0	0	2
PHLDB2	0	0	0	1	0	0	0	1	2
ONECUT2	0	0	0	1	0	0	0	1	2
NUAK1	0	0	0	1	0	0	0	1	2
KLF5	0	0	0	0	1	0	0	1	2
TCF4	0	0	0	0	1	0	0	1	2
CDK6	0	0	0	0	0	1	0	1	2
CCND2	0	0	0	0	0	1	0	1	2
ITGB8	0	0	0	0	0	0	1	1	2
PPP1R9A	1	0	0	0	0	0	0	0	1
NR5A2	1	0	0	0	0	0	0	0	1
SLC2A4	1	0	0	0	0	0	0	0	1
PRKCE	1	0	0	0	0	0	0	0	1
LIMS2	0	1	0	0	0	0	0	0	1
TMEM236	0	1	0	0	0	0	0	0	1
MTMR4	0	1	0	0	0	0	0	0	1
FOXC1	0	0	1	0	0	0	0	0	1
LAMB3	0	0	1	0	0	0	0	0	1
PFKFB3	0	0	1	0	0	0	0	0	1
CKAP4	0	0	1	0	0	0	0	0	1
RBMS1	0	0	1	0	0	0	0	0	1
IDH1	0	0	1	0	0	0	0	0	1
PCSK6	0	0	1	0	0	0	0	0	1
SH3PXD2B	0	0	1	0	0	0	0	0	1
CHD3	0	0	1	0	0	0	0	0	1
ZNRF1	0	0	0	1	0	0	0	0	1
ZFAND5	0	0	0	1	0	0	0	0	1
SOCS3	0	0	0	1	0	0	0	0	1
NEDD4	0	0	0	1	0	0	0	0	1
DDIT4	0	0	0	1	0	0	0	0	1
RUNX1	0	0	0	1	0	0	0	0	1
SLC38A4	0	0	0	1	0	0	0	0	1
GALNT3	0	0	0	1	0	0	0	0	1
DIO2	0	0	0	1	0	0	0	0	1
JAG2	0	0	0	1	0	0	0	0	1
WIPF3	0	0	0	1	0	0	0	0	1
PGM2L1	0	0	0	1	0	0	0	0	1
TIA1	0	0	0	1	0	0	0	0	1
MAL	0	0	0	1	0	0	0	0	1
ACTN1	0	0	0	1	0	0	0	0	1
FGD6	0	0	0	1	0	0	0	0	1
HOXB3	0	0	0	1	0	0	0	0	1
ACSBG1	0	0	0	1	0	0	0	0	1
INHBA	0	0	0	1	0	0	0	0	1
CDH13	0	0	0	1	0	0	0	0	1
ADAM11	0	0	0	1	0	0	0	0	1
BMP7	0	0	0	1	0	0	0	0	1
CAND1	0	0	0	1	0	0	0	0	1
SSH1	0	0	0	1	0	0	0	0	1
RAB11A	0	0	0	1	0	0	0	0	1
UBE2E2	0	0	0	0	1	0	0	0	1
ATP7A	0	0	0	0	1	0	0	0	1
SOX21	0	0	0	0	1	0	0	0	1
TCF12	0	0	0	0	1	0	0	0	1
NLK	0	0	0	0	1	0	0	0	1
TGIF2	0	0	0	0	0	1	0	0	1
NT5C2	0	0	0	0	0	1	0	0	1
YWHAQ	0	0	0	0	0	1	0	0	1
CNN3	0	0	0	0	0	1	0	0	1
HSPD1	0	0	0	0	0	1	0	0	1
CLTC	0	0	0	0	0	1	0	0	1
ARID2	0	0	0	0	0	1	0	0	1
CREM	0	0	0	0	0	1	0	0	1
CCND1	0	0	0	0	0	1	0	0	1
SYNCRIP	0	0	0	0	0	1	0	0	1
SLC16A3	0	0	0	0	0	1	0	0	1
PHLDA2	0	0	0	0	0	1	0	0	1
TRIM27	0	0	0	0	0	1	0	0	1
LEF1	0	0	0	0	0	1	0	0	1
TANC2	0	0	0	0	0	0	1	0	1
SCAMP4	0	0	0	0	0	0	1	0	1
PTGS2	0	0	0	0	0	0	1	0	1
ALDH1L1	0	0	0	0	0	0	1	0	1
MBOAT2	0	0	0	0	0	0	1	0	1
ADPGK	0	0	0	0	0	0	0	1	1
TNFRSF11B	0	0	0	0	0	0	0	1	1
DACH1	0	0	0	0	0	0	0	1	1
ABCE1	0	0	0	0	0	0	0	1	1
ANGPT2	0	0	0	0	0	0	0	1	1
EXT1	0	0	0	0	0	0	0	1	1
BLOC1S2	0	0	0	0	0	0	0	1	1
MPZL1	0	0	0	0	0	0	0	1	1
BZW1	0	0	0	0	0	0	0	1	1
YWHAG	0	0	0	0	0	0	0	1	1
MYCN	0	0	0	0	0	0	0	1	1
SET	0	0	0	0	0	0	0	1	1
EIF4E3	0	0	0	0	0	0	0	1	1
ETS2	0	0	0	0	0	0	0	1	1
