# Supplementary material for: Dysregulation of miR-1-3p: An Early Event in Colitis-Associated Dysplasia
Source: Int J Mol Sci. 2022 Oct 27;23(21):13024. doi: 10.3390/ijms232113024 (PMC9657954; doi:10.3390/ijms232113024)
Supplement: Supplementary file 1 [file ijms-23-13024-s001.zip › Supplementary Data S5 - Fragoso et al - Pathway_Enrichment_ Analysis_EnrichR.xlsx]

## Sheet: KEGG_2019_Mouse_table
Term	Overlap	P-value	Adjusted P-value	Old P-value	Old Adjusted P-value	Odds Ratio	Combined Score	Genes
Proteoglycans in cancer	22/203	7.29621e-21	1.10538e-18	0	0	16.673	773.075	TGFB2;CAMK2D;FZD4;FZD7;RPS6;STAT3;FN1;IGF1;CBL;ELK1;HIF1A;HOXD10;RHOA;EGFR;IGF1R;VEGFA;CDC42;MDM2;AKT1;TIMP3;KRAS;PRKACB
Pathways in cancer	37/535	7.68059e-28	2.32722e-25	0	0	10.6398	664.284	GSK3B;CAMK2D;NOTCH4;PDGFB;PTEN;CXCR4;CBL;ELK1;ETS1;HIF1A;FOXO1;ADCY6;EGFR;IGF1R;CASP9;CDC42;CCND2;AKT1;HES1;JAK2;PRKACB;TGFB2;FZD4;FZD7;STAT3;FN1;IGF1;RHOA;RUNX1;VEGFA;CCNE2;MDM2;RARB;KRAS;CALM1;CALM2;FGF10
Glioma	11/75	1.9593e-12	5.39699e-11	0	0	22.5641	608.293	CAMK2D;PTEN;PDGFB;MDM2;AKT1;KRAS;IGF1;CALM1;CALM2;EGFR;IGF1R
Prostate cancer	12/97	1.51398e-12	4.58737e-11	0	0	19.0325	517.994	CASP9;GSK3B;CCNE2;PDGFB;MDM2;PTEN;AKT1;KRAS;IGF1;FOXO1;EGFR;IGF1R
Longevity regulating pathway	12/102	2.7919e-12	6.50726e-11	0	0	18.0995	481.526	IRS1;RHEB;AKT1;KRAS;IGF1;PRKACB;ADIPOR2;PPARGC1A;FOXO1;ADCY6;HSPA1B;IGF1R
Insulin signaling pathway	14/139	3.46735e-13	1.75101e-11	0	0	15.4953	444.563	GSK3B;IRS1;RPS6;CBL;ELK1;FOXO1;RHEB;FASN;AKT1;KRAS;CALM1;PRKACB;PPARGC1A;CALM2
Thyroid hormone signaling pathway	12/115	1.1869e-11	2.24769e-10	0	0	16.0535	403.86	CASP9;GSK3B;RHEB;NOTCH4;MDM2;AKT1;GATA4;KRAS;PRKACB;HIF1A;FOXO1;MYH6
FoxO signaling pathway	13/132	3.35836e-12	7.26846e-11	0	0	15.1515	400.296	TGFB2;IRS1;STAT3;PTEN;IGF1;FOXO1;EGFR;IGF1R;CCND2;BCL6;MDM2;AKT1;KRAS
Melanoma	9/72	9.43038e-10	1.14296e-08	0	0	19.2308	399.652	PTEN;PDGFB;MDM2;AKT1;KRAS;IGF1;EGFR;IGF1R;FGF10
Transcriptional misregulation in cancer	15/183	9.99893e-13	3.78709e-11	0	0	12.6103	348.438	SMAD1;IGF1;RUNX2;FOXO1;IGF1R;RUNX1;FCGR1;CDK9;HOXA9;CCND2;BCL6;PAX7;DDIT3;NFKBIZ;MDM2
MAPK signaling pathway	20/294	4.55195e-15	4.59747e-13	0	0	10.4657	345.612	TGFB2;BDNF;SRF;PDGFB;IGF1;ELK1;EGFR;IGF1R;VEGFA;CDC42;DDIT3;RASA1;AKT1;KRAS;MAP3K7;PRKACB;MYD88;MAP4K3;HSPA1B;FGF10
Cellular senescence	15/185	1.1719e-12	3.9454e-11	0	0	12.474	342.691	TGFB2;PTEN;GATA4;ETS1;FOXO1;ZFP36L1;NFATC4;CCND2;CCNE2;RHEB;MDM2;AKT1;KRAS;CALM1;CALM2
Ras signaling pathway	17/233	1.89555e-13	1.1487e-11	0	0	11.2248	328.821	BDNF;PDGFB;IGF1;ELK1;ETS1;RHOA;EGFR;IGF1R;VEGFA;CDC42;RASA1;AKT1;KRAS;CALM1;PRKACB;CALM2;FGF10
Renal cell carcinoma	8/68	1.36643e-08	1.21773e-07	0	0	18.0995	327.755	CDC42;TGFB2;PDGFB;AKT1;KRAS;ETS1;HIF1A;VEGFA
AGE-RAGE signaling pathway in diabetic complications	10/101	1.10463e-09	1.28732e-08	0	0	15.2323	314.147	CDC42;TGFB2;PRKCE;STAT3;FN1;AKT1;KRAS;JAK2;FOXO1;VEGFA
Signaling pathways regulating pluripotency of stem cells	12/137	9.48611e-11	1.51279e-09	0	0	13.4756	310.998	SMAD1;GSK3B;FZD4;FZD7;STAT3;AKT1;KRAS;IGF1;JAK2;ACVR1B;KLF4;IGF1R
Neurotrophin signaling pathway	11/121	3.97047e-10	5.23067e-09	0	0	13.986	302.755	CDC42;GSK3B;CAMK2D;IRS1;BDNF;RIPK2;AKT1;KRAS;CALM1;CALM2;RHOA
HIF-1 signaling pathway	10/104	1.47626e-09	1.59752e-08	0	0	14.7929	300.795	CAMK2D;RPS6;STAT3;AKT1;IGF1;HIF1A;EGFR;IGF1R;PDK1;VEGFA
Endometrial cancer	7/58	9.50849e-08	6.40238e-07	0	0	18.5676	300.211	CASP9;GSK3B;PTEN;AKT1;KRAS;ELK1;EGFR
GnRH signaling pathway	9/90	7.09325e-09	7.16418e-08	0	0	15.3846	288.679	CDC42;CAMK2D;KRAS;CALM1;ELK1;PRKACB;CALM2;EGFR;ADCY6
PI3K-Akt signaling pathway	21/357	1.60128e-14	1.21297e-12	0	0	9.04977	287.47	GSK3B;IRS1;BDNF;RPS6;PDGFB;FN1;PTEN;IGF1;EGFR;IGF1R;VEGFA;CASP9;CCND2;CCNE2;RHEB;MYB;MDM2;AKT1;KRAS;JAK2;FGF10
Human cytomegalovirus infection	17/255	8.22785e-13	3.56148e-11	0	0	10.2564	285.396	GSK3B;STAT3;CXCR4;ELK1;RHOA;ADCY6;EGFR;NFATC4;VEGFA;CASP9;RHEB;MDM2;AKT1;KRAS;CALM1;PRKACB;CALM2
Pancreatic cancer	8/75	3.00236e-08	2.33261e-07	0	0	16.4103	284.247	CASP9;CDC42;TGFB2;STAT3;AKT1;KRAS;EGFR;VEGFA
Breast cancer	12/147	2.16541e-10	3.12438e-09	0	0	12.5589	279.476	GSK3B;FZD4;NOTCH4;FZD7;PTEN;AKT1;HES1;KRAS;IGF1;EGFR;IGF1R;FGF10
cGMP-PKG signaling pathway	13/172	9.74756e-11	1.47676e-09	0	0	11.6279	268.04	MEF2A;IRS1;PRKCE;SRF;ADRB1;GATA4;RHOA;ADCY6;NFATC4;KCNMB1;AKT1;CALM1;CALM2
mTOR signaling pathway	12/154	3.72126e-10	5.12518e-09	0	0	11.988	260.281	GSK3B;IRS1;FZD4;RHEB;FZD7;RPS6;PTEN;AKT1;KRAS;IGF1;RHOA;IGF1R
Focal adhesion	14/199	4.68311e-11	8.34696e-10	0	0	10.8233	257.428	VAV3;GSK3B;PDGFB;FN1;PTEN;IGF1;ELK1;RHOA;EGFR;IGF1R;VEGFA;CDC42;CCND2;AKT1
Melanogenesis	9/100	1.80908e-08	1.48149e-07	0	0	13.8462	246.847	GSK3B;CAMK2D;FZD4;FZD7;KRAS;CALM1;PRKACB;CALM2;ADCY6
MicroRNAs in cancer	17/281	3.92255e-12	7.92354e-11	0	0	9.30742	244.453	TGFB2;IRS1;PRKCE;NOTCH4;DNMT3A;STAT3;PDGFB;PTEN;HOXD10;RHOA;EGFR;VEGFA;CCND2;CCNE2;MDM2;TIMP3;KRAS
Hepatitis B	12/163	7.17969e-10	9.06436e-09	0	0	11.3261	238.466	CASP9;EGR2;TGFB2;CCNE2;STAT3;AKT1;KRAS;JAK2;ELK1;MAP3K7;MYD88;NFATC4
Rap1 signaling pathway	14/209	9.01376e-11	1.51732e-09	0	0	10.3055	238.363	PDGFB;IGF1;RHOA;ADCY6;EGFR;IGF1R;VEGFA;CDC42;AKT1;KRAS;CALM1;CALM2;RAPGEF3;FGF10
AMPK signaling pathway	10/126	9.66126e-09	9.14801e-08	0	0	12.21	225.338	IRS1;RHEB;FASN;AKT1;IGF1;MAP3K7;ADIPOR2;PPARGC1A;FOXO1;IGF1R
Hepatocellular carcinoma	12/171	1.24571e-09	1.39797e-08	0	0	10.7962	221.361	GSK3B;TGFB2;SMARCD2;SMARCB1;FZD4;FZD7;PTEN;AKT1;KRAS;ELK1;EGFR;IGF1R
Human papillomavirus infection	19/360	2.16291e-12	5.46134e-11	0	0	8.11966	218.091	GSK3B;FZD4;NOTCH4;FZD7;FN1;PTEN;RBPJ;FOXO1;EGFR;VEGFA;CDC42;CCND2;CCNE2;RHEB;MDM2;AKT1;HES1;KRAS;PRKACB
Tuberculosis	12/178	1.97135e-09	2.05972e-08	0	0	10.3717	207.895	FCGR1;CASP9;TGFB2;CAMK2D;RIPK2;AKT1;CALM1;JAK2;CALM2;MYD88;RHOA;HSPD1
Estrogen signaling pathway	10/134	1.7503e-08	1.47317e-07	0	0	11.4811	205.062	KRT17;KRT16;AKT1;KRAS;CALM1;PRKACB;CALM2;ADCY6;EGFR;HSPA1B
Apelin signaling pathway	10/138	2.32161e-08	1.85118e-07	0	0	11.1483	195.969	MEF2A;PRKCE;RPS6;AKT1;KRAS;CALM1;PRKACB;PPARGC1A;CALM2;ADCY6
Measles	10/144	3.4878e-08	2.57757e-07	0	0	10.6838	183.455	CASP9;GSK3B;CCND2;CCNE2;STAT3;AKT1;ADAR;MAP3K7;MYD88;HSPA1B
Central carbon metabolism in cancer	6/64	3.69711e-06	1.89868e-05	0	0	14.4231	180.403	PTEN;AKT1;KRAS;HIF1A;EGFR;PDK1
ErbB signaling pathway	7/84	1.24535e-06	6.98782e-06	0	0	12.8205	174.309	GSK3B;CAMK2D;AKT1;KRAS;CBL;ELK1;EGFR
Non-small cell lung cancer	6/66	4.43309e-06	2.16649e-05	0	0	13.986	172.397	CASP9;STAT3;AKT1;RARB;KRAS;EGFR
Gastric cancer	10/150	5.14355e-08	3.71071e-07	0	0	10.2564	172.133	GSK3B;TGFB2;CCNE2;FZD4;FZD7;AKT1;RARB;KRAS;EGFR;FGF10
Leishmaniasis	6/67	4.84337e-06	2.25775e-05	0	0	13.7773	168.605	FCGR1;TGFB2;JAK2;ELK1;MAP3K7;MYD88
Long-term potentiation	6/67	4.84337e-06	2.22355e-05	0	0	13.7773	168.605	CAMK2D;KRAS;CALM1;PRKACB;CALM2;RAPGEF3
Gap junction	7/86	1.46156e-06	8.05189e-06	0	0	12.5224	168.25	GJA1;PDGFB;ADRB1;KRAS;PRKACB;EGFR;ADCY6
Autophagy	9/130	1.77783e-07	1.17105e-06	0	0	10.6509	165.544	IRS1;RHEB;PTEN;AKT1;KRAS;MAP3K7;PRKACB;HIF1A;IGF1R
Oxytocin signaling pathway	10/154	6.60069e-08	4.65119e-07	0	0	9.99001	165.17	CAMK2D;KRAS;CALM1;ELK1;PRKACB;CALM2;RHOA;ADCY6;EGFR;NFATC4
Toxoplasmosis	8/108	5.2376e-07	3.37658e-06	0	0	11.396	164.812	CASP9;TGFB2;STAT3;AKT1;JAK2;MAP3K7;MYD88;HSPA1B
Colorectal cancer	7/88	1.70834e-06	9.24334e-06	0	0	12.2378	162.517	CASP9;GSK3B;TGFB2;AKT1;KRAS;RHOA;EGFR
Insulin resistance	8/110	6.03002e-07	3.72877e-06	0	0	11.1888	160.239	GSK3B;IRS1;PRKCE;STAT3;PTEN;AKT1;PPARGC1A;FOXO1
cAMP signaling pathway	12/211	1.3455e-08	1.23542e-07	0	0	8.74954	158.576	VAV3;CAMK2D;BDNF;AKT1;ADRB1;SOX9;CALM1;PRKACB;CALM2;RHOA;RAPGEF3;ADCY6
C-type lectin receptor signaling pathway	8/112	6.92275e-07	4.19519e-06	0	0	10.989	155.86	EGR2;MDM2;AKT1;KRAS;CALM1;CALM2;RHOA;NFATC4
Adipocytokine signaling pathway	6/71	6.80488e-06	2.98823e-05	0	0	13.0011	154.685	IRS1;STAT3;AKT1;JAK2;ADIPOR2;PPARGC1A
p53 signaling pathway	6/71	6.80488e-06	2.94554e-05	0	0	13.0011	154.685	CASP9;CCND2;CCNE2;PTEN;MDM2;IGF1
Human T-cell leukemia virus 1 infection	13/245	7.48321e-09	7.31423e-08	0	0	8.16327	152.74	EGR2;TGFB2;SRF;PTEN;ELK1;ETS1;ADCY6;NFATC4;CCND2;CCNE2;AKT1;KRAS;PRKACB
Kaposi sarcoma-associated herpesvirus infection	12/216	1.74708e-08	1.51247e-07	0	0	8.54701	152.673	CASP9;GSK3B;STAT3;PDGFB;AKT1;KRAS;CALM1;JAK2;HIF1A;CALM2;NFATC4;VEGFA
Adherens junction	6/72	7.38423e-06	3.1513e-05	0	0	12.8205	151.489	CDC42;SNAI1;MAP3K7;RHOA;EGFR;IGF1R
Prolactin signaling pathway	6/72	7.38423e-06	3.10753e-05	0	0	12.8205	151.489	GSK3B;CCND2;STAT3;AKT1;KRAS;JAK2
Oocyte meiosis	8/116	9.05097e-07	5.37734e-06	0	0	10.6101	147.642	CAMK2D;CCNE2;IGF1;CALM1;PRKACB;CALM2;ADCY6;IGF1R
Regulation of lipolysis in adipocytes	5/56	3.14508e-05	0.000117649	0	0	13.7363	142.405	IRS1;AKT1;ADRB1;PRKACB;ADCY6
Chemokine signaling pathway	11/197	6.70708e-08	4.61874e-07	0	0	8.59039	141.892	VAV3;CDC42;GSK3B;STAT3;AKT1;CXCR4;KRAS;JAK2;PRKACB;RHOA;ADCY6
Chronic myeloid leukemia	6/76	1.01156e-05	4.19866e-05	0	0	12.1457	139.694	TGFB2;MDM2;AKT1;KRAS;CBL;RUNX1
Viral carcinogenesis	12/229	3.34026e-08	2.53025e-07	0	0	8.06181	138.781	CDC42;EGR2;CCND2;CCNE2;GTF2B;SRF;STAT3;MDM2;KRAS;RBPJ;PRKACB;RHOA
VEGF signaling pathway	5/58	3.73376e-05	0.000136305	0	0	13.2626	135.219	CASP9;CDC42;AKT1;KRAS;VEGFA
Adrenergic signaling in cardiomyocytes	9/148	5.3628e-07	3.38526e-06	0	0	9.35551	135.081	CAMK2D;AKT1;ADRB1;CALM1;PRKACB;CALM2;MYH6;RAPGEF3;ADCY6
Bladder cancer	4/41	0.00014324	0.000476943	0	0	15.0094	132.848	MDM2;KRAS;EGFR;VEGFA
T cell receptor signaling pathway	7/101	4.31604e-06	2.1796e-05	0	0	10.6626	131.717	VAV3;CDC42;GSK3B;AKT1;KRAS;MAP3K7;RHOA
Aldosterone synthesis and secretion	7/102	4.60923e-06	2.21682e-05	0	0	10.5581	129.732	NR4A2;CAMK2D;PRKCE;CALM1;PRKACB;CALM2;ADCY6
Glucagon signaling pathway	7/102	4.60923e-06	2.18218e-05	0	0	10.5581	129.732	CAMK2D;AKT1;CALM1;PRKACB;PPARGC1A;CALM2;FOXO1
Cushing syndrome	9/159	9.79854e-07	5.70954e-06	0	0	8.70827	120.486	GSK3B;CAMK2D;CCNE2;FZD4;FZD7;AHR;PRKACB;ADCY6;EGFR
Parathyroid hormone synthesis, secretion and action	7/107	6.33588e-06	2.82319e-05	0	0	10.0647	120.467	MEF2A;NR4A2;PRKACB;RUNX2;RHOA;EGFR;ADCY6
Wnt signaling pathway	9/160	1.03261e-06	5.90343e-06	0	0	8.65385	119.28	GSK3B;CAMK2D;CCND2;FZD4;FZD7;MAP3K7;PRKACB;RHOA;NFATC4
Dilated cardiomyopathy (DCM)	6/90	2.67486e-05	0.000103908	0	0	10.2564	107.99	TGFB2;ADRB1;IGF1;PRKACB;MYH6;ADCY6
Progesterone-mediated oocyte maturation	6/90	2.67486e-05	0.000102593	0	0	10.2564	107.99	AKT1;KRAS;IGF1;PRKACB;ADCY6;IGF1R
Fluid shear stress and atherosclerosis	8/143	4.37285e-06	2.17209e-05	0	0	8.60678	106.208	MEF2A;PDGFB;AKT1;CALM1;MAP3K7;CALM2;RHOA;VEGFA
Small cell lung cancer	6/92	3.03118e-05	0.000114806	0	0	10.0334	104.388	CASP9;CCNE2;PTEN;FN1;AKT1;RARB
Acute myeloid leukemia	5/69	8.64972e-05	0.000304752	0	0	11.1483	104.297	FCGR1;STAT3;AKT1;KRAS;RUNX1
Phospholipase D signaling pathway	8/149	5.9292e-06	2.68142e-05	0	0	8.2602	99.4166	RHEB;PDGFB;AKT1;KRAS;RHOA;RAPGEF3;ADCY6;EGFR
Axon guidance	9/180	2.74294e-06	1.43295e-05	0	0	7.69231	98.5114	CDC42;GSK3B;CAMK2D;RASA1;CXCR4;KRAS;RHOA;PDK1;NFATC4
Gastric acid secretion	5/74	0.000120809	0.000411294	0	0	10.395	93.7765	CAMK2D;CALM1;PRKACB;CALM2;ADCY6
Choline metabolism in cancer	6/99	4.58996e-05	0.000165566	0	0	9.32401	93.138	RHEB;PDGFB;AKT1;KRAS;HIF1A;EGFR
Inflammatory mediator regulation of TRP channels	7/127	1.95009e-05	7.87837e-05	0	0	8.47971	91.9629	CAMK2D;PRKCE;IGF1;CALM1;PRKACB;CALM2;ADCY6
Renin secretion	5/76	0.000137125	0.000461655	0	0	10.1215	90.0265	ADRB1;CALM1;PRKACB;CALM2;ADCY6
Epstein-Barr virus infection	10/229	2.55681e-06	1.35915e-05	0	0	6.71817	86.5082	CASP9;CCND2;CCNE2;STAT3;MDM2;AKT1;HES1;RBPJ;MAP3K7;MYD88
Salivary secretion	5/78	0.000155077	0.000510743	0	0	9.86193	86.5048	ADRB1;CALM1;PRKACB;CALM2;ADCY6
Ovarian steroidogenesis	4/57	0.00051565	0.00156242	0	0	10.7962	81.7283	IGF1;PRKACB;ADCY6;IGF1R
Legionellosis	4/58	0.000551081	0.00163703	0	0	10.6101	79.6141	CASP9;HSPA1B;MYD88;HSPD1
Vascular smooth muscle contraction	7/140	3.65537e-05	0.00013507	0	0	7.69231	78.5902	PRKCE;KCNMB1;CALM1;PRKACB;CALM2;RHOA;ADCY6
Aldosterone-regulated sodium reabsorption	3/38	0.001917	0.00514026	0	0	12.1457	75.9959	IRS1;KRAS;IGF1
Cholinergic synapse	6/113	9.61062e-05	0.000334715	0	0	8.16882	75.5621	CAMK2D;AKT1;KRAS;JAK2;PRKACB;ADCY6
Fc gamma R-mediated phagocytosis	5/87	0.000259069	0.000817687	0	0	8.84173	73.0187	VAV3;FCGR1;CDC42;PRKCE;AKT1
Regulation of actin cytoskeleton	9/217	1.24923e-05	5.11509e-05	0	0	6.38072	72.0408	VAV3;CDC42;PDGFB;FN1;CXCR4;KRAS;RHOA;EGFR;FGF10
Thermogenesis	9/231	2.05305e-05	8.18519e-05	0	0	5.99401	64.6969	SMARCD2;SMARCB1;RHEB;RPS6;PRDM16;KRAS;PRKACB;PPARGC1A;ADCY6
Hippo signaling pathway	7/159	8.19608e-05	0.000292166	0	0	6.7731	63.7299	YAP1;SMAD1;GSK3B;TGFB2;CCND2;FZD4;FZD7
Amphetamine addiction	4/68	0.0010062	0.00284933	0	0	9.04977	62.4577	CAMK2D;CALM1;PRKACB;CALM2
Human immunodeficiency virus 1 infection	9/238	2.59766e-05	0.000102219	0	0	5.81771	61.4252	CASP9;AKT1;CXCR4;KRAS;CALM1;MAP3K7;CALM2;MYD88;NFATC4
Hedgehog signaling pathway	3/44	0.00292548	0.00770801	0	0	10.4895	61.1989	GSK3B;CCND2;PRKACB
Circadian entrainment	5/99	0.000471308	0.00144249	0	0	7.77001	59.5182	CAMK2D;CALM1;PRKACB;CALM2;ADCY6
Relaxin signaling pathway	6/131	0.000216161	0.000704268	0	0	7.04639	59.4679	AKT1;KRAS;PRKACB;ADCY6;EGFR;VEGFA
Influenza A	7/168	0.000115668	0.000398268	0	0	6.41026	58.1076	CASP9;GSK3B;AKT1;ADAR;JAK2;MYD88;HSPA1B
B cell receptor signaling pathway	4/72	0.00124596	0.00349562	0	0	8.54701	57.1611	VAV3;GSK3B;AKT1;KRAS
Th17 cell differentiation	5/102	0.000540419	0.00162126	0	0	7.54148	56.7358	STAT3;AHR;JAK2;HIF1A;RUNX1
Dopaminergic synapse	6/135	0.00025439	0.000811369	0	0	6.83761	56.5924	GSK3B;CAMK2D;AKT1;CALM1;PRKACB;CALM2
Bacterial invasion of epithelial cells	4/74	0.00137968	0.00376615	0	0	8.31601	54.7684	CDC42;FN1;CBL;RHOA
Pertussis	4/76	0.0015231	0.00412052	0	0	8.09717	52.5264	CALM1;CALM2;RHOA;MYD88
Notch signaling pathway	3/49	0.00397487	0.0102939	0	0	9.41915	52.0668	NOTCH4;HES1;RBPJ
Phototransduction	2/27	0.0132327	0.0325977	0	0	11.396	49.2885	CALM1;CALM2
Calcium signaling pathway	7/189	0.000239147	0.000770867	0	0	5.69801	47.5124	CAMK2D;CXCR4;ADRB1;CALM1;PRKACB;CALM2;EGFR
Non-alcoholic fatty liver disease (NAFLD)	6/151	0.000463407	0.00143278	0	0	6.11309	46.9296	CDC42;GSK3B;IRS1;DDIT3;AKT1;ADIPOR2
Leukocyte transendothelial migration	5/115	0.000931187	0.00266179	0	0	6.68896	46.6826	VAV3;CDC42;CXCR4;RHOA;RAPGEF3
Insulin secretion	4/86	0.00239844	0.0063748	0	0	7.15564	43.1695	CAMK2D;KCNMB1;PRKACB;ADCY6
Hepatitis C	6/160	0.000629096	0.00185064	0	0	5.76923	42.5263	CASP9;GSK3B;STAT3;AKT1;KRAS;EGFR
Cell cycle	5/123	0.00125803	0.00349708	0	0	6.25391	41.7649	GSK3B;TGFB2;CCND2;CCNE2;MDM2
Sphingolipid signaling pathway	5/124	0.00130415	0.00359235	0	0	6.20347	41.2047	PRKCE;PTEN;AKT1;KRAS;RHOA
JAK-STAT signaling pathway	6/164	0.000716029	0.00208612	0	0	5.62852	40.7605	CCND2;STAT3;PDGFB;AKT1;JAK2;EGFR
Tight junction	6/167	0.000787116	0.00227139	0	0	5.52741	39.5051	CDC42;PRKCE;GATA4;PRKACB;RHOA;RUNX1
TGF-beta signaling pathway	4/91	0.00294445	0.00769111	0	0	6.76247	39.4105	SMAD1;TGFB2;ACVR1B;RHOA
Long-term depression	3/61	0.00733857	0.0188439	0	0	7.5662	37.185	KRAS;IGF1;IGF1R
Endocytosis	8/269	0.000381279	0.00119101	0	0	4.57535	36.0171	CDC42;MDM2;CXCR4;CBL;RHOA;EGFR;HSPA1B;IGF1R
Basal cell carcinoma	3/63	0.00802165	0.0204249	0	0	7.32601	35.3525	GSK3B;FZD4;FZD7
Prion diseases	2/34	0.0205348	0.0493813	0	0	9.04977	35.1641	ELK1;PRKACB
Fc epsilon RI signaling pathway	3/68	0.00988894	0.0245602	0	0	6.78733	31.3326	VAV3;AKT1;KRAS
Fatty acid biosynthesis	1/14	0.0872803	0.178689	0	0	10.989	26.7981	FASN
Vasopressin-regulated water reabsorption	2/43	0.0318279	0.0736172	0	0	7.15564	24.6684	PRKACB;ADCY6
Platelet activation	4/125	0.00902084	0.0227776	0	0	4.92308	23.1789	AKT1;PRKACB;RHOA;ADCY6
Osteoclast differentiation	4/128	0.00978386	0.0245001	0	0	4.80769	22.2453	FCGR1;TGFB2;AKT1;MAP3K7
Hypertrophic cardiomyopathy (HCM)	3/86	0.0185654	0.0450024	0	0	5.36673	21.3942	TGFB2;IGF1;MYH6
Cocaine addiction	2/48	0.0389357	0.0887031	0	0	6.41026	20.8067	BDNF;PRKACB
Type II diabetes mellitus	2/48	0.0389357	0.0880411	0	0	6.41026	20.8067	IRS1;PRKCE
Malaria	2/49	0.0404234	0.090728	0	0	6.27943	20.1466	TGFB2;MYD88
Fanconi anemia pathway	2/51	0.0434622	0.0961244	0	0	6.03318	18.9192	USP1;HES1
Apoptosis	4/141	0.0135713	0.0331622	0	0	4.36443	18.7662	CASP9;DDIT3;AKT1;KRAS
Phosphatidylinositol signaling system	3/98	0.0260945	0.0622568	0	0	4.70958	17.1713	PTEN;CALM1;CALM2
Toll-like receptor signaling pathway	3/99	0.0267854	0.063406	0	0	4.662	16.876	AKT1;MAP3K7;MYD88
Endocrine and other factor-regulated calcium reabsorption	2/55	0.0497842	0.108522	0	0	5.59441	16.7835	PRKACB;ADCY6
Chagas disease (American trypanosomiasis)	3/103	0.0296463	0.0690988	0	0	4.48096	15.7659	TGFB2;AKT1;MYD88
Amoebiasis	3/106	0.031894	0.0732112	0	0	4.35414	15.0015	TGFB2;FN1;PRKACB
Inflammatory bowel disease (IBD)	2/59	0.056415	0.121232	0	0	5.21512	14.9936	TGFB2;STAT3
Mitophagy	2/63	0.0633348	0.135144	0	0	4.884	13.4765	KRAS;HIF1A
Alzheimer disease	4/175	0.0274862	0.0645606	0	0	3.51648	12.6385	CASP9;GSK3B;CALM1;CALM2
Cortisol synthesis and secretion	2/69	0.0742148	0.155083	0	0	4.45931	11.5977	PRKACB;ADCY6
Bile secretion	2/72	0.0798634	0.165744	0	0	4.2735	10.801	PRKACB;ADCY6
Thyroid hormone synthesis	2/73	0.0817754	0.168557	0	0	4.21496	10.5533	PRKACB;ADCY6
Maturity onset diabetes of the young	1/27	0.161539	0.302138	0	0	5.69801	10.3875	HES1
Serotonergic synapse	3/132	0.0549469	0.118921	0	0	3.4965	10.1447	KRAS;PRKACB;RAPGEF3
Alcoholism	4/199	0.0410583	0.0914754	0	0	3.09239	9.87325	BDNF;KRAS;CALM1;CALM2
Salmonella infection	2/78	0.0915416	0.186155	0	0	3.94477	9.4318	CDC42;MYD88
NOD-like receptor signaling pathway	4/205	0.0449508	0.0986964	0	0	3.00188	9.31238	RIPK2;MAP3K7;MYD88;RHOA
Parkinson disease	3/144	0.0676527	0.142353	0	0	3.20513	8.63259	CASP9;LRRK2;PRKACB
Rheumatoid arthritis	2/84	0.103682	0.209437	0	0	3.663	8.30194	TGFB2;VEGFA
Th1 and Th2 cell differentiation	2/87	0.109909	0.219095	0	0	3.53669	7.80939	RBPJ;JAK2
Viral myocarditis	2/87	0.109909	0.217663	0	0	3.53669	7.80939	CASP9;MYH6
Taste transduction	2/88	0.112006	0.220376	0	0	3.4965	7.65455	PRKACB;ADCY6
GABAergic synapse	2/90	0.116232	0.227215	0	0	3.4188	7.35783	PRKACB;ADCY6
IL-17 signaling pathway	2/91	0.11836	0.229892	0	0	3.38123	7.21563	GSK3B;MAP3K7
Morphine addiction	2/92	0.120498	0.232554	0	0	3.34448	7.07733	PRKACB;ADCY6
DNA replication	1/35	0.204224	0.375029	0	0	4.3956	6.98259	POLA1
Thyroid cancer	1/37	0.214553	0.391624	0	0	4.158	6.39999	KRAS
African trypanosomiasis	1/39	0.22475	0.40778	0	0	3.94477	5.88863	MYD88
NF-kappa B signaling pathway	2/102	0.142371	0.27131	0	0	3.01659	5.8803	MAP3K7;MYD88
Herpes simplex virus 1 infection	6/433	0.0636466	0.13486	0	0	2.13182	5.8719	CASP9;RHEB;AKT1;JAK2;MAP3K7;MYD88
Necroptosis	3/176	0.10722	0.215151	0	0	2.62238	5.85543	CAMK2D;STAT3;JAK2
Pancreatic secretion	2/105	0.149089	0.282338	0	0	2.9304	5.57717	RHOA;ADCY6
TNF signaling pathway	2/110	0.160424	0.301917	0	0	2.7972	5.11869	AKT1;MAP3K7
Basal transcription factors	1/43	0.244751	0.438814	0	0	3.57782	5.03583	GTF2B
Carbohydrate digestion and absorption	1/43	0.244751	0.436232	0	0	3.57782	5.03583	AKT1
Intestinal immune network for IgA production	1/43	0.244751	0.433681	0	0	3.57782	5.03583	CXCR4
Huntington disease	3/192	0.129712	0.248752	0	0	2.40385	4.9097	CASP9;BDNF;PPARGC1A
Glutamatergic synapse	2/114	0.169604	0.315276	0	0	2.69906	4.78891	PRKACB;ADCY6
Natural killer cell mediated cytotoxicity	2/118	0.17887	0.330473	0	0	2.60756	4.48787	VAV3;KRAS
Cysteine and methionine metabolism	1/50	0.278528	0.487826	0	0	3.07692	3.93304	DNMT3A
Amyotrophic lateral sclerosis (ALS)	1/52	0.2879	0.498478	0	0	2.95858	3.68385	CASP9
Ubiquitin mediated proteolysis	2/138	0.226154	0.407885	0	0	2.22965	3.31447	MDM2;CBL
Cytosolic DNA-sensing pathway	1/61	0.328602	0.562522	0	0	2.52207	2.80683	ADAR
Retrograde endocannabinoid signaling	2/150	0.254967	0.449158	0	0	2.05128	2.80332	PRKACB;ADCY6
Protein processing in endoplasmic reticulum	2/163	0.286265	0.498496	0	0	1.88768	2.36118	DDIT3;HSPA1B
RIG-I-like receptor signaling pathway	1/68	0.358656	0.610521	0	0	2.26244	2.31989	MAP3K7
Type I diabetes mellitus	1/69	0.362839	0.61419	0	0	2.22965	2.26042	HSPD1
Arrhythmogenic right ventricular cardiomyopathy (ARVC)	1/72	0.375226	0.63163	0	0	2.13675	2.0945	GJA1
Inositol phosphate metabolism	1/73	0.379301	0.634963	0	0	2.10748	2.04304	PTEN
Cytokine-cytokine receptor interaction	3/292	0.295426	0.508603	0	0	1.58061	1.9273	TGFB2;CXCR4;ACVR1B
Cardiac muscle contraction	1/78	0.399288	0.664748	0	0	1.97239	1.8108	MYH6
ECM-receptor interaction	1/83	0.418635	0.69315	0	0	1.85357	1.61401	FN1
RNA degradation	1/83	0.418635	0.689382	0	0	1.85357	1.61401	HSPD1
Antigen processing and presentation	1/90	0.444686	0.728324	0	0	1.7094	1.38527	HSPA1B
Hematopoietic cell lineage	1/94	0.45905	0.747806	0	0	1.63666	1.2743	FCGR1
Staphylococcus aureus infection	1/95	0.462582	0.749532	0	0	1.61943	1.24847	FCGR1
Spliceosome	1/132	0.578375	0.932169	0	0	1.1655	0.63815	HSPA1B
Purine metabolism	1/136	0.589303	0.944756	0	0	1.13122	0.598206	ADCY6
Systemic lupus erythematosus	1/143	0.607755	0.96921	0	0	1.07585	0.535754	FCGR1
Cell adhesion molecules (CAMs)	1/170	0.671537	1	0	0	0.904977	0.36035	VCAN
Ribosome	1/170	0.671537	1	0	0	0.904977	0.36035	RPS6
Phagosome	1/180	0.69245	1	0	0	0.854701	0.314119	FCGR1
Neuroactive ligand-receptor interaction	1/348	0.898668	1	0	0	0.442087	0.0472332	ADRB1
Olfactory transduction	4/1133	0.941158	1	0	0	0.543146	0.0329389	CAMK2D;CALM1;PRKACB;CALM2

## Sheet: KEGG_2019_Mouse_FINAL
Term	Overlap	P-value	Adjusted P-value	Old P-value	Old Adjusted P-value	Odds Ratio	Combined Score	Genes
MAPK signaling pathway	20/294	4.55195e-15	4.59747e-13	0	0	10.4657	345.612	TGFB2;BDNF;SRF;PDGFB;IGF1;ELK1;EGFR;IGF1R;VEGFA;CDC42;DDIT3;RASA1;AKT1;KRAS;MAP3K7;PRKACB;MYD88;MAP4K3;HSPA1B;FGF10
PI3K-Akt signaling pathway	21/357	1.60128e-14	1.21297e-12	0	0	9.04977	287.47	GSK3B;IRS1;BDNF;RPS6;PDGFB;FN1;PTEN;IGF1;EGFR;IGF1R;VEGFA;CASP9;CCND2;CCNE2;RHEB;MYB;MDM2;AKT1;KRAS;JAK2;FGF10
Ras signaling pathway	17/233	1.89555e-13	1.1487e-11	0	0	11.2248	328.821	BDNF;PDGFB;IGF1;ELK1;ETS1;RHOA;EGFR;IGF1R;VEGFA;CDC42;RASA1;AKT1;KRAS;CALM1;PRKACB;CALM2;FGF10
Insulin signaling pathway	14/139	3.46735e-13	1.75101e-11	0	0	15.4953	444.563	GSK3B;IRS1;RPS6;CBL;ELK1;FOXO1;RHEB;FASN;AKT1;KRAS;CALM1;PRKACB;PPARGC1A;CALM2
FoxO signaling pathway	13/132	3.35836e-12	7.26846e-11	0	0	15.1515	400.296	TGFB2;IRS1;STAT3;PTEN;IGF1;FOXO1;EGFR;IGF1R;CCND2;BCL6;MDM2;AKT1;KRAS
Focal adhesion	14/199	4.68311e-11	8.34696e-10	0	0	10.8233	257.428	VAV3;GSK3B;PDGFB;FN1;PTEN;IGF1;ELK1;RHOA;EGFR;IGF1R;VEGFA;CDC42;CCND2;AKT1
cGMP-PKG signaling pathway	13/172	9.74756e-11	1.47676e-09	0	0	11.6279	268.04	MEF2A;IRS1;PRKCE;SRF;ADRB1;GATA4;RHOA;ADCY6;NFATC4;KCNMB1;AKT1;CALM1;CALM2
Signaling pathways regulating pluripotency of stem cells	12/137	9.48611e-11	1.51279e-09	0	0	13.4756	310.998	SMAD1;GSK3B;FZD4;FZD7;STAT3;AKT1;KRAS;IGF1;JAK2;ACVR1B;KLF4;IGF1R
Rap1 signaling pathway	14/209	9.01376e-11	1.51732e-09	0	0	10.3055	238.363	PDGFB;IGF1;RHOA;ADCY6;EGFR;IGF1R;VEGFA;CDC42;AKT1;KRAS;CALM1;CALM2;RAPGEF3;FGF10
mTOR signaling pathway	12/154	3.72126e-10	5.12518e-09	0	0	11.988	260.281	GSK3B;IRS1;FZD4;RHEB;FZD7;RPS6;PTEN;AKT1;KRAS;IGF1;RHOA;IGF1R
HIF-1 signaling pathway	10/104	1.47626e-09	1.59752e-08	0	0	14.7929	300.795	CAMK2D;RPS6;STAT3;AKT1;IGF1;HIF1A;EGFR;IGF1R;PDK1;VEGFA
AMPK signaling pathway	10/126	9.66126e-09	9.14801e-08	0	0	12.21	225.338	IRS1;RHEB;FASN;AKT1;IGF1;MAP3K7;ADIPOR2;PPARGC1A;FOXO1;IGF1R
cAMP signaling pathway	12/211	1.3455e-08	1.23542e-07	0	0	8.74954	158.576	VAV3;CAMK2D;BDNF;AKT1;ADRB1;SOX9;CALM1;PRKACB;CALM2;RHOA;RAPGEF3;ADCY6
Chemokine signaling pathway	11/197	6.70708e-08	4.61874e-07	0	0	8.59039	141.892	VAV3;CDC42;GSK3B;STAT3;AKT1;CXCR4;KRAS;JAK2;PRKACB;RHOA;ADCY6
Autophagy	9/130	1.77783e-07	1.17105e-06	0	0	10.6509	165.544	IRS1;RHEB;PTEN;AKT1;KRAS;MAP3K7;PRKACB;HIF1A;IGF1R
C-type lectin receptor signaling pathway	8/112	6.92275e-07	4.19519e-06	0	0	10.989	155.86	EGR2;MDM2;AKT1;KRAS;CALM1;CALM2;RHOA;NFATC4
Wnt signaling pathway	9/160	1.03261e-06	5.90343e-06	0	0	8.65385	119.28	GSK3B;CAMK2D;CCND2;FZD4;FZD7;MAP3K7;PRKACB;RHOA;NFATC4
ErbB signaling pathway	7/84	1.24535e-06	6.98782e-06	0	0	12.8205	174.309	GSK3B;CAMK2D;AKT1;KRAS;CBL;ELK1;EGFR
Gap junction	7/86	1.46156e-06	8.05189e-06	0	0	12.5224	168.25	GJA1;PDGFB;ADRB1;KRAS;PRKACB;EGFR;ADCY6
Colorectal cancer	7/88	1.70834e-06	9.24334e-06	0	0	12.2378	162.517	CASP9;GSK3B;TGFB2;AKT1;KRAS;RHOA;EGFR
Central carbon metabolism in cancer	6/64	3.69711e-06	1.89868e-05	0	0	14.4231	180.403	PTEN;AKT1;KRAS;HIF1A;EGFR;PDK1
T cell receptor signaling pathway	7/101	4.31604e-06	2.1796e-05	0	0	10.6626	131.717	VAV3;CDC42;GSK3B;AKT1;KRAS;MAP3K7;RHOA
Glucagon signaling pathway	7/102	4.60923e-06	2.18218e-05	0	0	10.5581	129.732	CAMK2D;AKT1;CALM1;PRKACB;PPARGC1A;CALM2;FOXO1
Phospholipase D signaling pathway	8/149	5.9292e-06	2.68142e-05	0	0	8.2602	99.4166	RHEB;PDGFB;AKT1;KRAS;RHOA;RAPGEF3;ADCY6;EGFR
p53 signaling pathway	6/71	6.80488e-06	2.94554e-05	0	0	13.0011	154.685	CASP9;CCND2;CCNE2;PTEN;MDM2;IGF1
Adipocytokine signaling pathway	6/71	6.80488e-06	2.98823e-05	0	0	13.0011	154.685	IRS1;STAT3;AKT1;JAK2;ADIPOR2;PPARGC1A
Adherens junction	6/72	7.38423e-06	3.1513e-05	0	0	12.8205	151.489	CDC42;SNAI1;MAP3K7;RHOA;EGFR;IGF1R
Inflammatory mediator regulation of TRP channels	7/127	1.95009e-05	7.87837e-05	0	0	8.47971	91.9629	CAMK2D;PRKCE;IGF1;CALM1;PRKACB;CALM2;ADCY6
VEGF signaling pathway	5/58	3.73376e-05	0.000136305	0	0	13.2626	135.219	CASP9;CDC42;AKT1;KRAS;VEGFA
Hippo signaling pathway	7/159	8.19608e-05	0.000292166	0	0	6.7731	63.7299	YAP1;SMAD1;GSK3B;TGFB2;CCND2;FZD4;FZD7
Calcium signaling pathway	7/189	0.000239147	0.000770867	0	0	5.69801	47.5124	CAMK2D;CXCR4;ADRB1;CALM1;PRKACB;CALM2;EGFR
Fc gamma R-mediated phagocytosis	5/87	0.000259069	0.000817687	0	0	8.84173	73.0187	VAV3;FCGR1;CDC42;PRKCE;AKT1
Th17 cell differentiation	5/102	0.000540419	0.00162126	0	0	7.54148	56.7358	STAT3;AHR;JAK2;HIF1A;RUNX1
JAK-STAT signaling pathway	6/164	0.000716029	0.00208612	0	0	5.62852	40.7605	CCND2;STAT3;PDGFB;AKT1;JAK2;EGFR
Tight junction	6/167	0.000787116	0.00227139	0	0	5.52741	39.5051	CDC42;PRKCE;GATA4;PRKACB;RHOA;RUNX1
Leukocyte transendothelial migration	5/115	0.000931187	0.00266179	0	0	6.68896	46.6826	VAV3;CDC42;CXCR4;RHOA;RAPGEF3
B cell receptor signaling pathway	4/72	0.00124596	0.00349562	0	0	8.54701	57.1611	VAV3;GSK3B;AKT1;KRAS
Cell cycle	5/123	0.00125803	0.00349708	0	0	6.25391	41.7649	GSK3B;TGFB2;CCND2;CCNE2;MDM2
Insulin secretion	4/86	0.00239844	0.0063748	0	0	7.15564	43.1695	CAMK2D;KCNMB1;PRKACB;ADCY6
TGF-beta signaling pathway	4/91	0.00294445	0.00769111	0	0	6.76247	39.4105	SMAD1;TGFB2;ACVR1B;RHOA
Hedgehog signaling pathway	3/44	0.00292548	0.00770801	0	0	10.4895	61.1989	GSK3B;CCND2;PRKACB
Notch signaling pathway	3/49	0.00397487	0.0102939	0	0	9.41915	52.0668	NOTCH4;HES1;RBPJ
Fc epsilon RI signaling pathway	3/68	0.00988894	0.0245602	0	0	6.78733	31.3326	VAV3;AKT1;KRAS
Apoptosis	4/141	0.0135713	0.0331622	0	0	4.36443	18.7662	CASP9;DDIT3;AKT1;KRAS
Phosphatidylinositol signaling system	3/98	0.0260945	0.0622568	0	0	4.70958	17.1713	PTEN;CALM1;CALM2
Toll-like receptor signaling pathway	3/99	0.0267854	0.063406	0	0	4.662	16.876	AKT1;MAP3K7;MYD88
NOD-like receptor signaling pathway	4/205	0.0449508	0.0986964	0	0	3.00188	9.31238	RIPK2;MAP3K7;MYD88;RHOA
Inflammatory bowel disease (IBD)	2/59	0.056415	0.121232	0	0	5.21512	14.9936	TGFB2;STAT3
Mitophagy	2/63	0.0633348	0.135144	0	0	4.884	13.4765	KRAS;HIF1A
Fatty acid biosynthesis	1/14	0.0872803	0.178689	0	0	10.989	26.7981	FASN
Th1 and Th2 cell differentiation	2/87	0.109909	0.219095	0	0	3.53669	7.80939	RBPJ;JAK2
IL-17 signaling pathway	2/91	0.11836	0.229892	0	0	3.38123	7.21563	GSK3B;MAP3K7
NF-kappa B signaling pathway	2/102	0.142371	0.27131	0	0	3.01659	5.8803	MAP3K7;MYD88
TNF signaling pathway	2/110	0.160424	0.301917	0	0	2.7972	5.11869	AKT1;MAP3K7
Natural killer cell mediated cytotoxicity	2/118	0.17887	0.330473	0	0	2.60756	4.48787	VAV3;KRAS
DNA replication	1/35	0.204224	0.375029	0	0	4.3956	6.98259	POLA1
Ubiquitin mediated proteolysis	2/138	0.226154	0.407885	0	0	2.22965	3.31447	MDM2;CBL
Intestinal immune network for IgA production	1/43	0.244751	0.433681	0	0	3.57782	5.03583	CXCR4
Basal transcription factors	1/43	0.244751	0.438814	0	0	3.57782	5.03583	GTF2B
Cytokine-cytokine receptor interaction	3/292	0.295426	0.508603	0	0	1.58061	1.9273	TGFB2;CXCR4;ACVR1B
RIG-I-like receptor signaling pathway	1/68	0.358656	0.610521	0	0	2.26244	2.31989	MAP3K7
RNA degradation	1/83	0.418635	0.689382	0	0	1.85357	1.61401	HSPD1
Antigen processing and presentation	1/90	0.444686	0.728324	0	0	1.7094	1.38527	HSPA1B
Hematopoietic cell lineage	1/94	0.45905	0.747806	0	0	1.63666	1.2743	FCGR1
Cell adhesion molecules (CAMs)	1/170	0.671537	1	0	0	0.904977	0.36035	VCAN
Phagosome	1/180	0.69245	1	0	0	0.854701	0.314119	FCGR1
		Cutoff = 0.01
			removed for further analysis

## Sheet: WikiPathways_2019_Mouse_table
Term	Overlap	P-value	Adjusted P-value	Old P-value	Old Adjusted P-value	Odds Ratio	Combined Score	Genes
Factors and pathways affecting insulin-like growth factor (IGF1)-Akt signaling WP3675	9/31	2.79357e-13	1.6389e-11	0	0	44.665	1291.1	IGFBP5;IRS1;PTEN;AKT1;IGF1;PPARGC1A;FOXO1;IGF1R;PDK1
EPO Receptor Signaling WP1249	6/26	1.38931e-08	1.43835e-07	0	0	35.503	642.315	IRS1;RASA1;STAT3;AKT1;JAK2;PDK1
MicroRNAs in Cardiomyocyte Hypertrophy WP1560	11/82	5.39061e-12	1.89749e-10	0	0	20.6379	535.478	CDK9;GSK3B;CAMK2D;STAT3;AKT1;GATA4;IGF1;CALM1;RHOA;IGF1R;NFATC4
Endochondral Ossification WP1270	9/62	2.37376e-10	4.64202e-09	0	0	22.3325	494.919	TGFB2;AKT1;TIMP3;SOX9;IGF1;CALM1;RUNX2;IGF1R;VEGFA
Heart Development WP2067	7/44	1.30674e-08	1.53324e-07	0	0	24.4755	444.308	SMAD1;SRF;HAND2;GATA4;NFATC4;VEGFA;FGF10
IL-7 Signaling Pathway WP297	7/44	1.30674e-08	1.43742e-07	0	0	24.4755	444.308	GSK3B;CCND2;IRS1;STAT3;AKT1;CBL;FOXO1
MAPK signaling pathway WP493	15/159	1.26131e-13	1.10995e-11	0	0	14.5138	431.081	TGFB2;BDNF;SRF;PDGFB;ACVR1B;ELK1;EGFR;CASP9;CDC42;DDIT3;RASA1;AKT1;KRAS;MAP3K7;MAP4K3
Ptf1a related regulatory pathway WP201	3/11	4.26195e-05	0.000250034	0	0	41.958	422.232	HES1;RBPJ;FGF10
Leptin Insulin Overlap WP578	4/18	4.85908e-06	3.05428e-05	0	0	34.188	418.279	IRS1;STAT3;AKT1;JAK2
Neural Crest Differentiation WP2074	11/101	5.51456e-11	1.38652e-09	0	0	16.7555	395.783	SMAD1;GSK3B;TLX2;PAX7;NOTCH4;MYB;SNAI1;HES1;SOX9;RBPJ;ETS1
ESC Pluripotency Pathways WP339	12/118	1.61542e-11	4.73858e-10	0	0	15.6454	388.769	SMAD1;GSK3B;FZD4;FZD7;STAT3;PDGFB;MDM2;PTEN;AKT1;ELK1;EGFR;FGF10
EGFR1 Signaling Pathway WP572	15/178	6.66619e-13	2.93312e-11	0	0	12.9646	363.482	VAV3;STAT3;CBL;ELK1;FOXO1;EGFR;CASP9;CDC42;GJA1;SH3BGRL;KRT17;RASA1;AKT1;KRAS;JAK2
Id Signaling Pathway WP512	7/51	3.80189e-08	3.71741e-07	0	0	21.1161	360.773	SMAD1;IRS1;HES1;IGF1;ELK1;IGF1R;VEGFA
Delta-Notch Signaling Pathway WP265	9/83	3.42974e-09	4.31167e-08	0	0	16.6821	325.147	GSK3B;SMAD1;NOTCH4;STAT3;AKT1;HES1;RBPJ;JAK2;EGFR
Adipogenesis genes WP447	12/134	7.30902e-11	1.60799e-09	0	0	13.7773	321.552	MEF2A;EGR2;KLF5;IRS1;DDIT3;STAT3;GATA4;AHR;IGF1;HIF1A;PPARGC1A;FOXO1
White fat cell differentiation WP2872	5/32	1.87843e-06	1.37751e-05	0	0	24.0385	316.949	EGR2;KLF5;DDIT3;KLF4;FOXO1
Focal Adhesion-PI3K-Akt-mTOR-signaling pathway WP2841	20/324	2.88485e-14	5.07734e-12	0	0	9.49668	296.075	GSK3B;IRS1;RPS6;PDGFB;FN1;PTEN;IGF1;HIF1A;FOXO1;EGFR;IGF1R;VEGFA;CASP9;RHEB;MDM2;AKT1;KRAS;JAK2;PPARGC1A;FGF10
Wnt Signaling Pathway NetPath WP539	10/108	2.14275e-09	3.1427e-08	0	0	14.245	284.347	GSK3B;CAMK2D;FZD4;FZD7;MYB;AKT1;SOX9;MAP3K7;RUNX2;RHOA
p38 MAPK Signaling Pathway WP350	5/36	3.44411e-06	2.33139e-05	0	0	21.3675	268.779	CDC42;TGFB2;DDIT3;ELK1;MAP3K7
Insulin Signaling WP65	12/159	5.38865e-10	9.48403e-09	0	0	11.611	247.797	GSK3B;IRS1;RHEB;SRF;PTEN;AKT1;CBL;ELK1;MAP3K7;FOXO1;MAP4K3;IGF1R
IL-5 Signaling Pathway WP151	7/69	3.21574e-07	2.57259e-06	0	0	15.6076	233.334	GSK3B;STAT3;AKT1;KRAS;JAK2;CBL;ELK1
IL-2 Signaling Pathway WP450	7/76	6.27526e-07	4.80194e-06	0	0	14.17	202.369	IRS1;STAT3;AKT1;KRAS;JAK2;CBL;ETS1
Focal Adhesion WP85	12/185	3.05848e-09	4.14072e-08	0	0	9.97921	195.646	CDC42;GSK3B;CCND2;PDGFB;FN1;PTEN;AKT1;IGF1;ELK1;RHOA;EGFR;VEGFA
BMP Signaling Pathway in Eyelid Development WP3663	3/20	0.000282122	0.00134199	0	0	23.0769	188.612	SMAD1;EGFR;FGF10
IL-6 signaling Pathway WP387	8/99	2.67464e-07	2.35368e-06	0	0	12.432	188.15	CDK9;CASP9;GSK3B;STAT3;AKT1;JAK2;MAP3K7;FOXO1
IL-3 Signaling Pathway WP373	8/100	2.89149e-07	2.42334e-06	0	0	12.3077	185.309	CDC42;GSK3B;STAT3;AKT1;KRAS;JAK2;CBL;FOXO1
Signaling of Hepatocyte Growth Factor Receptor WP193	4/34	6.79439e-05	0.00035171	0	0	18.0995	173.698	RASA1;STAT3;PTEN;ELK1
p53 signaling WP2902	6/67	4.84337e-06	3.15716e-05	0	0	13.7773	168.605	CASP9;CCND2;CCNE2;PTEN;MDM2;IGF1
PluriNetWork WP1763	15/292	7.652e-10	1.22432e-08	0	0	7.90306	165.892	SMAD1;GSK3B;IRS1;DNMT3A;STAT3;PTEN;RBPJ;ACVR1B;KLF4;HIF1A;KLF5;HAND2;MDM2;AKT1;STK40
Chemokine signaling pathway WP2292	11/190	4.63133e-08	4.29008e-07	0	0	8.90688	150.418	VAV3;CDC42;GSK3B;STAT3;AKT1;CXCR4;KRAS;JAK2;PRKACB;RHOA;ADCY6
IL-9 Signaling Pathway WP10	3/24	0.000491466	0.00216245	0	0	19.2308	146.502	IRS1;STAT3;AKT1
Wnt Signaling Pathway and Pluripotency WP723	7/97	3.29366e-06	2.31873e-05	0	0	11.1023	140.15	GSK3B;CCND2;FZD4;PRKCE;FZD7;MAP3K7;RHOA
Dysregulated miRNA Targeting in Insulin/PI3K-AKT Signaling WP3855	3/26	0.000625368	0.00268451	0	0	17.7515	130.956	CCND2;RHEB;FASN
Novel Jun-Dmp1 Pathway WP3654	3/26	0.000625368	0.00262059	0	0	17.7515	130.956	MDM2;KRAS;ETS1
Wnt Signaling Pathway WP403	5/60	4.40437e-05	0.000250055	0	0	12.8205	128.594	GSK3B;CCND2;PRKCE;FZD7;RHOA
Kit Receptor Signaling Pathway WP407	5/67	7.5105e-05	0.000377671	0	0	11.4811	109.031	RASA1;STAT3;AKT1;JAK2;CBL
G Protein Signaling Pathways WP232	6/92	3.03118e-05	0.000183961	0	0	10.0334	104.388	PRKCE;KRAS;CALM1;PRKACB;RHOA;ADCY6
Glycogen Metabolism WP317	3/34	0.00138577	0.0055431	0	0	13.5747	89.3416	GSK3B;CALM1;CALM2
Regulation of Cardiac Hypertrophy by miR-208 WP1526	1/6	0.0383762	0.100809	0	0	25.641	83.5979	GATA4
Robo4 and VEGF Signaling Pathways Crosstalk WP3864	1/6	0.0383762	0.0993267	0	0	25.641	83.5979	VEGFA
mir-193a and MVP in colon cancer metastasis WP3979	1/6	0.0383762	0.0978872	0	0	25.641	83.5979	CCND2
Apoptosis WP1254	5/81	0.000185309	0.000905954	0	0	9.49668	81.6096	CASP9;MDM2;AKT1;IGF1;IGF1R
IL-1 Signaling Pathway WP37	3/37	0.00177402	0.0069384	0	0	12.474	79.0167	AKT1;MAP3K7;MYD88
Wnt Signaling in Kidney Disease WP3857	3/37	0.00177402	0.00678756	0	0	12.474	79.0167	FZD4;FZD7;RHOA
G13 Signaling Pathway WP298	3/39	0.00206695	0.00774008	0	0	11.8343	73.156	CDC42;CALM1;RHOA
Parkinsons Disease Pathway WP3638	3/39	0.00206695	0.00757883	0	0	11.8343	73.156	CASP9;CCNE2;LRRK2
Regulation of Actin Cytoskeleton WP523	7/152	6.17025e-05	0.000339364	0	0	7.08502	68.6764	CDC42;PDGFB;FN1;KRAS;RHOA;EGFR;FGF10
Myometrial Relaxation and Contraction Pathways WP385	7/153	6.43152e-05	0.000343015	0	0	7.03871	67.9356	ACTA1;GJA1;CAMK2D;IGFBP5;PRKCE;PRKACB;ADCY6
Alpha6-Beta4 Integrin Signaling Pathway WP488	4/67	0.000951756	0.00389556	0	0	9.18485	63.9008	IRS1;AKT1;RHOA;EGFR
Spinal Cord Injury WP2432	5/99	0.000471308	0.00212693	0	0	7.77001	59.5182	GJA1;VCAN;BDNF;SOX9;RHOA
ErbB signaling pathway WP1261	3/46	0.00332164	0.0119308	0	0	10.0334	57.2638	GSK3B;ELK1;EGFR
Notch Signaling Pathway WP29	3/46	0.00332164	0.0116922	0	0	10.0334	57.2638	NOTCH4;HES1;RBPJ
Calcium Regulation in the Cardiac Cell WP553	6/147	0.000401752	0.00186074	0	0	6.27943	49.1032	GJA1;CAMK2D;PRKCE;ADRB1;PRKACB;ADCY6
NLR Proteins WP1256	1/9	0.0570127	0.143346	0	0	17.094	48.9655	MAP3K7
TGF Beta Signaling Pathway WP113	3/52	0.00470106	0.0162233	0	0	8.87574	47.5737	SMAD1;STAT3;RUNX2
MAPK Cascade WP251	2/28	0.0141906	0.0438166	0	0	10.989	46.7602	KRAS;ELK1
Leptin and adiponectin WP683	1/10	0.0631449	0.154354	0	0	15.3846	42.4973	ADIPOR2
Dopaminergic Neurogenesis WP1498	2/30	0.0161932	0.0491381	0	0	10.2564	42.2888	NR4A2;STAT3
Hypothetical Network for Drug Addiction WP1246	2/31	0.0172372	0.0514195	0	0	9.92556	40.3046	ACTA1;PRKCE
Gene regulatory network modelling somitogenesis WP2852	1/11	0.0692375	0.166929	0	0	13.986	37.3456	HES1
SREBF and miR33 in cholesterol and lipid homeostasis WP2084	1/11	0.0692375	0.164673	0	0	13.986	37.3456	PPARGC1A
G1 to S cell cycle control WP413	3/61	0.00733857	0.0248382	0	0	7.5662	37.185	CCND2;CCNE2;MDM2
SIDS Susceptibility Pathways WP1266	3/61	0.00733857	0.0243696	0	0	7.5662	37.185	HES1;PPARGC1A;HSPD1
Nuclear Receptors WP509	2/38	0.0253035	0.0742237	0	0	8.09717	29.7718	NR4A2;RARB
Osteoclast WP454	1/14	0.0872803	0.199498	0	0	10.989	26.7981	PDGFB
Alzheimers Disease WP2075	3/75	0.0128947	0.0412632	0	0	6.15385	26.775	CASP9;GSK3B;CALM2
Microglia Pathogen Phagocytosis Pathway WP3626	2/41	0.0291456	0.082736	0	0	7.50469	26.5325	VAV3;FCGR1
Estrogen signaling WP1244	3/77	0.013839	0.0434939	0	0	5.99401	25.6559	GTF2B;AKT1;ELK1
Oxidative Damage WP1496	2/42	0.0304749	0.083806	0	0	7.32601	25.574	CDC42;CASP9
Striated Muscle Contraction WP216	2/45	0.0346035	0.0936956	0	0	6.83761	23.0003	ACTA1;MYH6
Mecp2 and Associated Rett Syndrome WP2910	2/47	0.0374696	0.0999188	0	0	6.54664	21.5007	BCL6;BDNF
Apoptosis Modulation by HSP70 WP166	1/17	0.104976	0.236869	0	0	9.04977	20.3984	CASP9
TNF-alpha NF-kB Signaling Pathway WP246	5/187	0.00757144	0.0246773	0	0	4.11353	20.0879	GSK3B;SMARCB1;RIPK2;NFKBIZ;AKT1
Mitochondrial Gene Expression WP1263	1/19	0.116584	0.259731	0	0	8.09717	17.402	PPARGC1A
Nucleotide Metabolism WP87	1/19	0.116584	0.256484	0	0	8.09717	17.402	POLA1
Integrin-mediated Cell Adhesion WP6	3/100	0.027486	0.0793039	0	0	4.61538	16.5881	VAV3;CDC42;AKT1
Hypertrophy Model WP202	1/20	0.122331	0.265806	0	0	7.69231	16.1617	VEGFA
Lung fibrosis WP3632	2/61	0.05984	0.148336	0	0	5.04414	14.2047	PDGFB;IGF1
EBV LMP1 signaling WP1243	1/22	0.133716	0.286999	0	0	6.99301	14.0702	MAP3K7
Fatty Acid Biosynthesis WP336	1/22	0.133716	0.283541	0	0	6.99301	14.0702	FASN
Signal Transduction of S1P Receptor WP57	1/22	0.133716	0.280166	0	0	6.99301	14.0702	AKT1
Non-odorant GPCRs WP1396	5/267	0.0304313	0.0850144	0	0	2.88101	10.0613	FZD4;FZD7;CXCR4;ADRB1;CELSR3
Matrix Metalloproteinases WP441	1/29	0.172419	0.357008	0	0	5.30504	9.32536	TIMP3
One Carbon Metabolism WP435	1/29	0.172419	0.352857	0	0	5.30504	9.32536	DNMT3A
Inflammatory Response Pathway WP458	1/30	0.177806	0.359699	0	0	5.12821	8.85674	FN1
Nuclear receptors in lipid metabolism and toxicity WP431	1/30	0.177806	0.355611	0	0	5.12821	8.85674	RARB
Glutathione and one carbon metabolism WP730	1/31	0.183158	0.3622	0	0	4.96278	8.42385	DNMT3A
Ovarian Infertility Genes WP273	1/31	0.183158	0.358175	0	0	4.96278	8.42385	CCND2
Prostaglandin Synthesis and Regulation WP374	1/31	0.183158	0.354239	0	0	4.96278	8.42385	ANXA5
TCA Cycle WP434	1/31	0.183158	0.350389	0	0	4.96278	8.42385	PDK1
Monoamine GPCRs WP570	1/33	0.193759	0.366684	0	0	4.662	7.651	ADRB1
Toll Like Receptor signaling WP88	1/33	0.193759	0.362783	0	0	4.662	7.651	MYD88
GPCRs, Other WP41	3/155	0.0803642	0.186107	0	0	2.97767	7.50726	FZD7;ADRB1;CELSR3
Type II interferon signaling (IFNG) WP1253	1/34	0.199008	0.368689	0	0	4.52489	7.30502	JAK2
Retinol metabolism WP1259	1/39	0.22475	0.412041	0	0	3.94477	5.88863	RARB
DNA Replication WP150	1/41	0.234815	0.426056	0	0	3.75235	5.43698	POLA1
mRNA processing WP310	6/457	0.0779961	0.183031	0	0	2.01986	5.15286	CDK9;ILF3;RPS6;ELAVL4;ADAR;PPARGC1A
Eukaryotic Transcription Initiation WP567	1/43	0.244751	0.439552	0	0	3.57782	5.03583	GTF2B
Tryptophan metabolism WP79	1/44	0.24967	0.443859	0	0	3.4965	4.85179	MDM2
Cholesterol metabolism (includes both Bloch and Kandutsch-Russell pathways) WP4346	1/49	0.273796	0.481881	0	0	3.13972	4.0671	FASN
One carbon metabolism and related pathways WP1770	1/52	0.2879	0.501687	0	0	2.95858	3.68385	DNMT3A
Peptide GPCRs WP234	1/71	0.371123	0.634153	0	0	2.16685	2.14782	CXCR4
Purine metabolism WP2185	2/171	0.305474	0.527093	0	0	1.79937	2.13385	POLA1;ADCY6
Primary Focal Segmental Glomerulosclerosis FSGS WP2573	1/72	0.375226	0.634997	0	0	2.13675	2.0945	AKT1
Cytoplasmic Ribosomal Proteins WP163	1/92	0.451915	0.750349	0	0	1.67224	1.3282	RPS6
GPCRs, Class A Rhodopsin-like WP189	2/228	0.437581	0.733469	0	0	1.34953	1.11538	CXCR4;ADRB1
Electron Transport Chain WP295	1/103	0.490033	0.806035	0	0	1.49365	1.0654	UCP2

## Sheet: WikiPathways_2019_Mouse_FINAL
Term	Overlap	P-value	Adjusted P-value	Old P-value	Old Adjusted P-value	Odds Ratio	Combined Score	Genes
Focal Adhesion-PI3K-Akt-mTOR-signaling pathway WP2841	20/324	2.88485e-14	5.07734e-12	0	0	9.49668	296.075	GSK3B;IRS1;RPS6;PDGFB;FN1;PTEN;IGF1;HIF1A;FOXO1;EGFR;IGF1R;VEGFA;CASP9;RHEB;MDM2;AKT1;KRAS;JAK2;PPARGC1A;FGF10
MAPK signaling pathway WP493	15/159	1.26131e-13	1.10995e-11	0	0	14.5138	431.081	TGFB2;BDNF;SRF;PDGFB;ACVR1B;ELK1;EGFR;CASP9;CDC42;DDIT3;RASA1;AKT1;KRAS;MAP3K7;MAP4K3
Factors and pathways affecting insulin-like growth factor (IGF1)-Akt signaling WP3675	9/31	2.79357e-13	1.6389e-11	0	0	44.665	1291.1	IGFBP5;IRS1;PTEN;AKT1;IGF1;PPARGC1A;FOXO1;IGF1R;PDK1
EGFR1 Signaling Pathway WP572	15/178	6.66619e-13	2.93312e-11	0	0	12.9646	363.482	VAV3;STAT3;CBL;ELK1;FOXO1;EGFR;CASP9;CDC42;GJA1;SH3BGRL;KRT17;RASA1;AKT1;KRAS;JAK2
Insulin Signaling WP65	12/159	5.38865e-10	9.48403e-09	0	0	11.611	247.797	GSK3B;IRS1;RHEB;SRF;PTEN;AKT1;CBL;ELK1;MAP3K7;FOXO1;MAP4K3;IGF1R
Focal Adhesion WP85	12/185	3.05848e-09	4.14072e-08	0	0	9.97921	195.646	CDC42;GSK3B;CCND2;PDGFB;FN1;PTEN;AKT1;IGF1;ELK1;RHOA;EGFR;VEGFA
Delta-Notch Signaling Pathway WP265	9/83	3.42974e-09	4.31167e-08	0	0	16.6821	325.147	GSK3B;SMAD1;NOTCH4;STAT3;AKT1;HES1;RBPJ;JAK2;EGFR
IL-7 Signaling Pathway WP297	7/44	1.30674e-08	1.43742e-07	0	0	24.4755	444.308	GSK3B;CCND2;IRS1;STAT3;AKT1;CBL;FOXO1
Chemokine signaling pathway WP2292	11/190	4.63133e-08	4.29008e-07	0	0	8.90688	150.418	VAV3;CDC42;GSK3B;STAT3;AKT1;CXCR4;KRAS;JAK2;PRKACB;RHOA;ADCY6
IL-6 signaling Pathway WP387	8/99	2.67464e-07	2.35368e-06	0	0	12.432	188.15	CDK9;CASP9;GSK3B;STAT3;AKT1;JAK2;MAP3K7;FOXO1
IL-3 Signaling Pathway WP373	8/100	2.89149e-07	2.42334e-06	0	0	12.3077	185.309	CDC42;GSK3B;STAT3;AKT1;KRAS;JAK2;CBL;FOXO1
IL-5 Signaling Pathway WP151	7/69	3.21574e-07	2.57259e-06	0	0	15.6076	233.334	GSK3B;STAT3;AKT1;KRAS;JAK2;CBL;ELK1
IL-2 Signaling Pathway WP450	7/76	6.27526e-07	4.80194e-06	0	0	14.17	202.369	IRS1;STAT3;AKT1;KRAS;JAK2;CBL;ETS1
Wnt Signaling Pathway and Pluripotency WP723	7/97	3.29366e-06	2.31873e-05	0	0	11.1023	140.15	GSK3B;CCND2;FZD4;PRKCE;FZD7;MAP3K7;RHOA
p38 MAPK Signaling Pathway WP350	5/36	3.44411e-06	2.33139e-05	0	0	21.3675	268.779	CDC42;TGFB2;DDIT3;ELK1;MAP3K7
Leptin Insulin Overlap WP578	4/18	4.85908e-06	3.05428e-05	0	0	34.188	418.279	IRS1;STAT3;AKT1;JAK2
p53 signaling WP2902	6/67	4.84337e-06	3.15716e-05	0	0	13.7773	168.605	CASP9;CCND2;CCNE2;PTEN;MDM2;IGF1
G Protein Signaling Pathways WP232	6/92	3.03118e-05	0.000183961	0	0	10.0334	104.388	PRKCE;KRAS;CALM1;PRKACB;RHOA;ADCY6
Kit Receptor Signaling Pathway WP407 (stem cells)	5/67	7.5105e-05	0.000377671	0	0	11.4811	109.031	RASA1;STAT3;AKT1;JAK2;CBL
Apoptosis WP1254	5/81	0.000185309	0.000905954	0	0	9.49668	81.6096	CASP9;MDM2;AKT1;IGF1;IGF1R
IL-9 Signaling Pathway WP10	3/24	0.000491466	0.00216245	0	0	19.2308	146.502	IRS1;STAT3;AKT1
Dysregulated miRNA Targeting in Insulin/PI3K-AKT Signaling WP3855	3/26	0.000625368	0.00268451	0	0	17.7515	130.956	CCND2;RHEB;FASN
Alpha6-Beta4 Integrin Signaling Pathway WP488	4/67	0.000951756	0.00389556	0	0	9.18485	63.9008	IRS1;AKT1;RHOA;EGFR
Glycogen Metabolism WP317	3/34	0.00138577	0.0055431	0	0	13.5747	89.3416	GSK3B;CALM1;CALM2
IL-1 Signaling Pathway WP37	3/37	0.00177402	0.0069384	0	0	12.474	79.0167	AKT1;MAP3K7;MYD88
G13 Signaling Pathway WP298	3/39	0.00206695	0.00774008	0	0	11.8343	73.156	CDC42;CALM1;RHOA
Notch Signaling Pathway WP29	3/46	0.00332164	0.0116922	0	0	10.0334	57.2638	NOTCH4;HES1;RBPJ
ErbB signaling pathway WP1261	3/46	0.00332164	0.0119308	0	0	10.0334	57.2638	GSK3B;ELK1;EGFR
TGF Beta Signaling Pathway WP113	3/52	0.00470106	0.0162233	0	0	8.87574	47.5737	SMAD1;STAT3;RUNX2
TNF-alpha NF-kB Signaling Pathway WP246	5/187	0.00757144	0.0246773	0	0	4.11353	20.0879	GSK3B;SMARCB1;RIPK2;NFKBIZ;AKT1
G1 to S cell cycle control WP413	3/61	0.00733857	0.0248382	0	0	7.5662	37.185	CCND2;CCNE2;MDM2
MAPK Cascade WP251	2/28	0.0141906	0.0438166	0	0	10.989	46.7602	KRAS;ELK1
Integrin-mediated Cell Adhesion WP6	3/100	0.027486	0.0793039	0	0	4.61538	16.5881	VAV3;CDC42;AKT1
Oxidative Damage WP1496	2/42	0.0304749	0.083806	0	0	7.32601	25.574	CDC42;CASP9
mir-193a and MVP in colon cancer metastasis WP3979	1/6	0.0383762	0.0978872	0	0	25.641	83.5979	CCND2
NLR Proteins WP1256	1/9	0.0570127	0.143346	0	0	17.094	48.9655	MAP3K7
Leptin and adiponectin WP683	1/10	0.0631449	0.154354	0	0	15.3846	42.4973	ADIPOR2
mRNA processing WP310	6/457	0.0779961	0.183031	0	0	2.01986	5.15286	CDK9;ILF3;RPS6;ELAVL4;ADAR;PPARGC1A
Apoptosis Modulation by HSP70 WP166	1/17	0.104976	0.236869	0	0	9.04977	20.3984	CASP9
Signal Transduction of S1P Receptor WP57	1/22	0.133716	0.280166	0	0	6.99301	14.0702	AKT1
Fatty Acid Biosynthesis WP336	1/22	0.133716	0.283541	0	0	6.99301	14.0702	FASN
One Carbon Metabolism WP435	1/29	0.172419	0.352857	0	0	5.30504	9.32536	DNMT3A
Prostaglandin Synthesis and Regulation WP374	1/31	0.183158	0.354239	0	0	4.96278	8.42385	ANXA5
Matrix Metalloproteinases WP441	1/29	0.172419	0.357008	0	0	5.30504	9.32536	TIMP3
Inflammatory Response Pathway WP458	1/30	0.177806	0.359699	0	0	5.12821	8.85674	FN1
Glutathione and one carbon metabolism WP730	1/31	0.183158	0.3622	0	0	4.96278	8.42385	DNMT3A
Toll Like Receptor signaling WP88	1/33	0.193759	0.362783	0	0	4.662	7.651	MYD88
Type II interferon signaling (IFNG) WP1253	1/34	0.199008	0.368689	0	0	4.52489	7.30502	JAK2
Retinol metabolism WP1259	1/39	0.22475	0.412041	0	0	3.94477	5.88863	RARB
DNA Replication WP150	1/41	0.234815	0.426056	0	0	3.75235	5.43698	POLA1
Eukaryotic Transcription Initiation WP567	1/43	0.244751	0.439552	0	0	3.57782	5.03583	GTF2B
Cholesterol metabolism (includes both Bloch and Kandutsch-Russell pathways) WP4346	1/49	0.273796	0.481881	0	0	3.13972	4.0671	FASN
One carbon metabolism and related pathways WP1770 (DNA syhnthesis)	1/52	0.2879	0.501687	0	0	2.95858	3.68385	DNMT3A
Purine metabolism WP2185	2/171	0.305474	0.527093	0	0	1.79937	2.13385	POLA1;ADCY6
Peptide GPCRs WP234	1/71	0.371123	0.634153	0	0	2.16685	2.14782	CXCR4
	Cutoff = 0.01
		removed for further analysis

## Sheet: Combined score >15
Term	Overlap	P-value	Adjusted P-value	Old P-value	Old Adjusted P-value	Odds Ratio	Combined Score	Genes
Adherens junction	6/72	7.38423e-06	3.1513e-05	0	0	12.8205	151.489	CDC42;SNAI1;MAP3K7;RHOA;EGFR;IGF1R
Adipocytokine signaling pathway	6/71	6.80488e-06	2.98823e-05	0	0	13.0011	154.685	IRS1;STAT3;AKT1;JAK2;ADIPOR2;PPARGC1A
Alpha6-Beta4 Integrin Signaling Pathway WP488	4/67	0.000951756	0.00389556	0	0	9.18485	63.9008	IRS1;AKT1;RHOA;EGFR
AMPK signaling pathway	10/126	9.66126e-09	9.14801e-08	0	0	12.21	225.338	IRS1;RHEB;FASN;AKT1;IGF1;MAP3K7;ADIPOR2;PPARGC1A;FOXO1;IGF1R
Apoptosis	4/141	0.0135713	0.0331622	0	0	4.36443	18.7662	CASP9;DDIT3;AKT1;KRAS
Apoptosis WP1254	5/81	0.000185309	0.000905954	0	0	9.49668	81.6096	CASP9;MDM2;AKT1;IGF1;IGF1R
Autophagy	9/130	1.77783e-07	1.17105e-06	0	0	10.6509	165.544	IRS1;RHEB;PTEN;AKT1;KRAS;MAP3K7;PRKACB;HIF1A;IGF1R
B cell receptor signaling pathway	4/72	0.00124596	0.00349562	0	0	8.54701	57.1611	VAV3;GSK3B;AKT1;KRAS
Calcium signaling pathway	7/189	0.000239147	0.000770867	0	0	5.69801	47.5124	CAMK2D;CXCR4;ADRB1;CALM1;PRKACB;CALM2;EGFR
cAMP signaling pathway	12/211	1.3455e-08	1.23542e-07	0	0	8.74954	158.576	VAV3;CAMK2D;BDNF;AKT1;ADRB1;SOX9;CALM1;PRKACB;CALM2;RHOA;RAPGEF3;ADCY6
Cell cycle	5/123	0.00125803	0.00349708	0	0	6.25391	41.7649	GSK3B;TGFB2;CCND2;CCNE2;MDM2
Central carbon metabolism in cancer	6/64	3.69711e-06	1.89868e-05	0	0	14.4231	180.403	PTEN;AKT1;KRAS;HIF1A;EGFR;PDK1
cGMP-PKG signaling pathway	13/172	9.74756e-11	1.47676e-09	0	0	11.6279	268.04	MEF2A;IRS1;PRKCE;SRF;ADRB1;GATA4;RHOA;ADCY6;NFATC4;KCNMB1;AKT1;CALM1;CALM2
Chemokine signaling pathway	11/197	6.70708e-08	4.61874e-07	0	0	8.59039	141.892	VAV3;CDC42;GSK3B;STAT3;AKT1;CXCR4;KRAS;JAK2;PRKACB;RHOA;ADCY6
Chemokine signaling pathway WP2292	11/190	4.63133e-08	4.29008e-07	0	0	8.90688	150.418	VAV3;CDC42;GSK3B;STAT3;AKT1;CXCR4;KRAS;JAK2;PRKACB;RHOA;ADCY6
Colorectal cancer	7/88	1.70834e-06	9.24334e-06	0	0	12.2378	162.517	CASP9;GSK3B;TGFB2;AKT1;KRAS;RHOA;EGFR
C-type lectin receptor signaling pathway	8/112	6.92275e-07	4.19519e-06	0	0	10.989	155.86	EGR2;MDM2;AKT1;KRAS;CALM1;CALM2;RHOA;NFATC4
Delta-Notch Signaling Pathway WP265	9/83	3.42974e-09	4.31167e-08	0	0	16.6821	325.147	GSK3B;SMAD1;NOTCH4;STAT3;AKT1;HES1;RBPJ;JAK2;EGFR
Dysregulated miRNA Targeting in Insulin/PI3K-AKT Signaling WP3855	3/26	0.000625368	0.00268451	0	0	17.7515	130.956	CCND2;RHEB;FASN
EGFR1 Signaling Pathway WP572	15/178	6.66619e-13	2.93312e-11	0	0	12.9646	363.482	VAV3;STAT3;CBL;ELK1;FOXO1;EGFR;CASP9;CDC42;GJA1;SH3BGRL;KRT17;RASA1;AKT1;KRAS;JAK2
ErbB signaling pathway	7/84	1.24535e-06	6.98782e-06	0	0	12.8205	174.309	GSK3B;CAMK2D;AKT1;KRAS;CBL;ELK1;EGFR
ErbB signaling pathway WP1261	3/46	0.00332164	0.0119308	0	0	10.0334	57.2638	GSK3B;ELK1;EGFR
Factors and pathways affecting insulin-like growth factor (IGF1)-Akt signaling WP3675	9/31	2.79357e-13	1.6389e-11	0	0	44.665	1291.1	IGFBP5;IRS1;PTEN;AKT1;IGF1;PPARGC1A;FOXO1;IGF1R;PDK1
Fc epsilon RI signaling pathway	3/68	0.00988894	0.0245602	0	0	6.78733	31.3326	VAV3;AKT1;KRAS
Fc gamma R-mediated phagocytosis	5/87	0.000259069	0.000817687	0	0	8.84173	73.0187	VAV3;FCGR1;CDC42;PRKCE;AKT1
Focal adhesion	14/199	4.68311e-11	8.34696e-10	0	0	10.8233	257.428	VAV3;GSK3B;PDGFB;FN1;PTEN;IGF1;ELK1;RHOA;EGFR;IGF1R;VEGFA;CDC42;CCND2;AKT1
Focal Adhesion WP85	12/185	3.05848e-09	4.14072e-08	0	0	9.97921	195.646	CDC42;GSK3B;CCND2;PDGFB;FN1;PTEN;AKT1;IGF1;ELK1;RHOA;EGFR;VEGFA
Focal Adhesion-PI3K-Akt-mTOR-signaling pathway WP2841	20/324	2.88485e-14	5.07734e-12	0	0	9.49668	296.075	GSK3B;IRS1;RPS6;PDGFB;FN1;PTEN;IGF1;HIF1A;FOXO1;EGFR;IGF1R;VEGFA;CASP9;RHEB;MDM2;AKT1;KRAS;JAK2;PPARGC1A;FGF10
FoxO signaling pathway	13/132	3.35836e-12	7.26846e-11	0	0	15.1515	400.296	TGFB2;IRS1;STAT3;PTEN;IGF1;FOXO1;EGFR;IGF1R;CCND2;BCL6;MDM2;AKT1;KRAS
G Protein Signaling Pathways WP232	6/92	3.03118e-05	0.000183961	0	0	10.0334	104.388	PRKCE;KRAS;CALM1;PRKACB;RHOA;ADCY6
G13 Signaling Pathway WP298	3/39	0.00206695	0.00774008	0	0	11.8343	73.156	CDC42;CALM1;RHOA
Gap junction	7/86	1.46156e-06	8.05189e-06	0	0	12.5224	168.25	GJA1;PDGFB;ADRB1;KRAS;PRKACB;EGFR;ADCY6
Glucagon signaling pathway	7/102	4.60923e-06	2.18218e-05	0	0	10.5581	129.732	CAMK2D;AKT1;CALM1;PRKACB;PPARGC1A;CALM2;FOXO1
Glycogen Metabolism WP317	3/34	0.00138577	0.0055431	0	0	13.5747	89.3416	GSK3B;CALM1;CALM2
Hedgehog signaling pathway	3/44	0.00292548	0.00770801	0	0	10.4895	61.1989	GSK3B;CCND2;PRKACB
HIF-1 signaling pathway	10/104	1.47626e-09	1.59752e-08	0	0	14.7929	300.795	CAMK2D;RPS6;STAT3;AKT1;IGF1;HIF1A;EGFR;IGF1R;PDK1;VEGFA
Hippo signaling pathway	7/159	8.19608e-05	0.000292166	0	0	6.7731	63.7299	YAP1;SMAD1;GSK3B;TGFB2;CCND2;FZD4;FZD7
IL-1 Signaling Pathway WP37	3/37	0.00177402	0.0069384	0	0	12.474	79.0167	AKT1;MAP3K7;MYD88
IL-2 Signaling Pathway WP450	7/76	6.27526e-07	4.80194e-06	0	0	14.17	202.369	IRS1;STAT3;AKT1;KRAS;JAK2;CBL;ETS1
IL-3 Signaling Pathway WP373	8/100	2.89149e-07	2.42334e-06	0	0	12.3077	185.309	CDC42;GSK3B;STAT3;AKT1;KRAS;JAK2;CBL;FOXO1
IL-5 Signaling Pathway WP151	7/69	3.21574e-07	2.57259e-06	0	0	15.6076	233.334	GSK3B;STAT3;AKT1;KRAS;JAK2;CBL;ELK1
IL-6 signaling Pathway WP387	8/99	2.67464e-07	2.35368e-06	0	0	12.432	188.15	CDK9;CASP9;GSK3B;STAT3;AKT1;JAK2;MAP3K7;FOXO1
IL-7 Signaling Pathway WP297	7/44	1.30674e-08	1.43742e-07	0	0	24.4755	444.308	GSK3B;CCND2;IRS1;STAT3;AKT1;CBL;FOXO1
IL-9 Signaling Pathway WP10	3/24	0.000491466	0.00216245	0	0	19.2308	146.502	IRS1;STAT3;AKT1
Inflammatory mediator regulation of TRP channels	7/127	1.95009e-05	7.87837e-05	0	0	8.47971	91.9629	CAMK2D;PRKCE;IGF1;CALM1;PRKACB;CALM2;ADCY6
Insulin secretion	4/86	0.00239844	0.0063748	0	0	7.15564	43.1695	CAMK2D;KCNMB1;PRKACB;ADCY6
Insulin signaling pathway	14/139	3.46735e-13	1.75101e-11	0	0	15.4953	444.563	GSK3B;IRS1;RPS6;CBL;ELK1;FOXO1;RHEB;FASN;AKT1;KRAS;CALM1;PRKACB;PPARGC1A;CALM2
Insulin Signaling WP65	12/159	5.38865e-10	9.48403e-09	0	0	11.611	247.797	GSK3B;IRS1;RHEB;SRF;PTEN;AKT1;CBL;ELK1;MAP3K7;FOXO1;MAP4K3;IGF1R
JAK-STAT signaling pathway	6/164	0.000716029	0.00208612	0	0	5.62852	40.7605	CCND2;STAT3;PDGFB;AKT1;JAK2;EGFR
Kit Receptor Signaling Pathway WP407 (stem cells)	5/67	7.5105e-05	0.000377671	0	0	11.4811	109.031	RASA1;STAT3;AKT1;JAK2;CBL
Leptin Insulin Overlap WP578	4/18	4.85908e-06	3.05428e-05	0	0	34.188	418.279	IRS1;STAT3;AKT1;JAK2
Leukocyte transendothelial migration	5/115	0.000931187	0.00266179	0	0	6.68896	46.6826	VAV3;CDC42;CXCR4;RHOA;RAPGEF3
MAPK signaling pathway	20/294	4.55195e-15	4.59747e-13	0	0	10.4657	345.612	TGFB2;BDNF;SRF;PDGFB;IGF1;ELK1;EGFR;IGF1R;VEGFA;CDC42;DDIT3;RASA1;AKT1;KRAS;MAP3K7;PRKACB;MYD88;MAP4K3;HSPA1B;FGF10
MAPK signaling pathway WP493	15/159	1.26131e-13	1.10995e-11	0	0	14.5138	431.081	TGFB2;BDNF;SRF;PDGFB;ACVR1B;ELK1;EGFR;CASP9;CDC42;DDIT3;RASA1;AKT1;KRAS;MAP3K7;MAP4K3
mTOR signaling pathway	12/154	3.72126e-10	5.12518e-09	0	0	11.988	260.281	GSK3B;IRS1;FZD4;RHEB;FZD7;RPS6;PTEN;AKT1;KRAS;IGF1;RHOA;IGF1R
NOD-like receptor signaling pathway	4/205	0.0449508	0.0986964	0	0	3.00188	9.31238	RIPK2;MAP3K7;MYD88;RHOA
Notch signaling pathway	3/49	0.00397487	0.0102939	0	0	9.41915	52.0668	NOTCH4;HES1;RBPJ
Notch Signaling Pathway WP29	3/46	0.00332164	0.0116922	0	0	10.0334	57.2638	NOTCH4;HES1;RBPJ
p38 MAPK Signaling Pathway WP350	5/36	3.44411e-06	2.33139e-05	0	0	21.3675	268.779	CDC42;TGFB2;DDIT3;ELK1;MAP3K7
p53 signaling pathway	6/71	6.80488e-06	2.94554e-05	0	0	13.0011	154.685	CASP9;CCND2;CCNE2;PTEN;MDM2;IGF1
p53 signaling WP2902	6/67	4.84337e-06	3.15716e-05	0	0	13.7773	168.605	CASP9;CCND2;CCNE2;PTEN;MDM2;IGF1
Phosphatidylinositol signaling system	3/98	0.0260945	0.0622568	0	0	4.70958	17.1713	PTEN;CALM1;CALM2
Phospholipase D signaling pathway	8/149	5.9292e-06	2.68142e-05	0	0	8.2602	99.4166	RHEB;PDGFB;AKT1;KRAS;RHOA;RAPGEF3;ADCY6;EGFR
PI3K-Akt signaling pathway	21/357	1.60128e-14	1.21297e-12	0	0	9.04977	287.47	GSK3B;IRS1;BDNF;RPS6;PDGFB;FN1;PTEN;IGF1;EGFR;IGF1R;VEGFA;CASP9;CCND2;CCNE2;RHEB;MYB;MDM2;AKT1;KRAS;JAK2;FGF10
Rap1 signaling pathway	14/209	9.01376e-11	1.51732e-09	0	0	10.3055	238.363	PDGFB;IGF1;RHOA;ADCY6;EGFR;IGF1R;VEGFA;CDC42;AKT1;KRAS;CALM1;CALM2;RAPGEF3;FGF10
Ras signaling pathway	17/233	1.89555e-13	1.1487e-11	0	0	11.2248	328.821	BDNF;PDGFB;IGF1;ELK1;ETS1;RHOA;EGFR;IGF1R;VEGFA;CDC42;RASA1;AKT1;KRAS;CALM1;PRKACB;CALM2;FGF10
Signaling pathways regulating pluripotency of stem cells	12/137	9.48611e-11	1.51279e-09	0	0	13.4756	310.998	SMAD1;GSK3B;FZD4;FZD7;STAT3;AKT1;KRAS;IGF1;JAK2;ACVR1B;KLF4;IGF1R
T cell receptor signaling pathway	7/101	4.31604e-06	2.1796e-05	0	0	10.6626	131.717	VAV3;CDC42;GSK3B;AKT1;KRAS;MAP3K7;RHOA
TGF Beta Signaling Pathway WP113	3/52	0.00470106	0.0162233	0	0	8.87574	47.5737	SMAD1;STAT3;RUNX2
TGF-beta signaling pathway	4/91	0.00294445	0.00769111	0	0	6.76247	39.4105	SMAD1;TGFB2;ACVR1B;RHOA
Th17 cell differentiation	5/102	0.000540419	0.00162126	0	0	7.54148	56.7358	STAT3;AHR;JAK2;HIF1A;RUNX1
Tight junction	6/167	0.000787116	0.00227139	0	0	5.52741	39.5051	CDC42;PRKCE;GATA4;PRKACB;RHOA;RUNX1
Toll-like receptor signaling pathway	3/99	0.0267854	0.063406	0	0	4.662	16.876	AKT1;MAP3K7;MYD88
VEGF signaling pathway	5/58	3.73376e-05	0.000136305	0	0	13.2626	135.219	CASP9;CDC42;AKT1;KRAS;VEGFA
Wnt signaling pathway	9/160	1.03261e-06	5.90343e-06	0	0	8.65385	119.28	GSK3B;CAMK2D;CCND2;FZD4;FZD7;MAP3K7;PRKACB;RHOA;NFATC4
Wnt Signaling Pathway and Pluripotency WP723	7/97	3.29366e-06	2.31873e-05	0	0	11.1023	140.15	GSK3B;CCND2;FZD4;PRKCE;FZD7;MAP3K7;RHOA
		Cutoff = 15
			removed for further analysis
			duplicated pathways

## Sheet: Final_Enriched_Pathways
Term	Overlap	% of genes	Adjusted P-value	Old P-value	Old Adjusted P-value	Odds Ratio	Combined Score	Genes
Insulin-like growth factor (IGF1)-Akt signaling	9/31	29.0323	1.6389e-11	0	0	44.665	1291.1	IGFBP5;IRS1;PTEN;AKT1;IGF1;PPARGC1A;FOXO1;IGF1R;PDK1
Insulin signaling pathway	14/139	10.0719	1.75101e-11	0	0	15.4953	444.563	GSK3B;IRS1;RPS6;CBL;ELK1;FOXO1;RHEB;FASN;AKT1;KRAS;CALM1;PRKACB;PPARGC1A;CALM2
IL-7 Signaling Pathway	7/44	15.9091	1.43742e-07	0	0	24.4755	444.308	GSK3B;CCND2;IRS1;STAT3;AKT1;CBL;FOXO1
MAPK signaling pathway	15/159	9.43396	1.10995e-11	0	0	14.5138	431.081	TGFB2;BDNF;SRF;PDGFB;ACVR1B;ELK1;EGFR;CASP9;CDC42;DDIT3;RASA1;AKT1;KRAS;MAP3K7;MAP4K3
Leptin Insulin Overlap	4/18	22.2222	3.05428e-05	0	0	34.188	418.279	IRS1;STAT3;AKT1;JAK2
FoxO signaling pathway	13/132	9.84848	7.26846e-11	0	0	15.1515	400.296	TGFB2;IRS1;STAT3;PTEN;IGF1;FOXO1;EGFR;IGF1R;CCND2;BCL6;MDM2;AKT1;KRAS
EGFR1 Signaling Pathway (can be either MAPK or PI3K)	15/178	8.42697	2.93312e-11	0	0	12.9646	363.482	VAV3;STAT3;CBL;ELK1;FOXO1;EGFR;CASP9;CDC42;GJA1;SH3BGRL;KRT17;RASA1;AKT1;KRAS;JAK2
Ras signaling pathway	17/233	7.29614	1.1487e-11	0	0	11.2248	328.821	BDNF;PDGFB;IGF1;ELK1;ETS1;RHOA;EGFR;IGF1R;VEGFA;CDC42;RASA1;AKT1;KRAS;CALM1;PRKACB;CALM2;FGF10
Delta-Notch Signaling Pathway	9/83	10.8434	4.31167e-08	0	0	16.6821	325.147	GSK3B;SMAD1;NOTCH4;STAT3;AKT1;HES1;RBPJ;JAK2;EGFR
Signaling pathways regulating pluripotency of stem cells	12/137	8.75912	1.51279e-09	0	0	13.4756	310.998	SMAD1;GSK3B;FZD4;FZD7;STAT3;AKT1;KRAS;IGF1;JAK2;ACVR1B;KLF4;IGF1R
HIF-1 signaling pathway	10/104	9.61538	1.59752e-08	0	0	14.7929	300.795	CAMK2D;RPS6;STAT3;AKT1;IGF1;HIF1A;EGFR;IGF1R;PDK1;VEGFA
Focal Adhesion-PI3K-Akt-mTOR-signaling pathway	20/324	6.17284	5.07734e-12	0	0	9.49668	296.075	GSK3B;IRS1;RPS6;PDGFB;FN1;PTEN;IGF1;HIF1A;FOXO1;EGFR;IGF1R;VEGFA;CASP9;RHEB;MDM2;AKT1;KRAS;JAK2;PPARGC1A;FGF10
PI3K-Akt signaling pathway	21/357	5.88235	1.21297e-12	0	0	9.04977	287.47	GSK3B;IRS1;BDNF;RPS6;PDGFB;FN1;PTEN;IGF1;EGFR;IGF1R;VEGFA;CASP9;CCND2;CCNE2;RHEB;MYB;MDM2;AKT1;KRAS;JAK2;FGF10
cGMP-PKG signaling pathway	13/172	7.55814	1.47676e-09	0	0	11.6279	268.04	MEF2A;IRS1;PRKCE;SRF;ADRB1;GATA4;RHOA;ADCY6;NFATC4;KCNMB1;AKT1;CALM1;CALM2
mTOR signaling pathway	12/154	7.79221	5.12518e-09	0	0	11.988	260.281	GSK3B;IRS1;FZD4;RHEB;FZD7;RPS6;PTEN;AKT1;KRAS;IGF1;RHOA;IGF1R
Rap1 signaling pathway	14/209	6.69856	1.51732e-09	0	0	10.3055	238.363	PDGFB;IGF1;RHOA;ADCY6;EGFR;IGF1R;VEGFA;CDC42;AKT1;KRAS;CALM1;CALM2;RAPGEF3;FGF10
IL-5 Signaling Pathway	7/69	10.1449	2.57259e-06	0	0	15.6076	233.334	GSK3B;STAT3;AKT1;KRAS;JAK2;CBL;ELK1
AMPK signaling pathway	10/126	7.93651	9.14801e-08	0	0	12.21	225.338	IRS1;RHEB;FASN;AKT1;IGF1;MAP3K7;ADIPOR2;PPARGC1A;FOXO1;IGF1R
IL-2 Signaling Pathway	7/76	9.21053	4.80194e-06	0	0	14.17	202.369	IRS1;STAT3;AKT1;KRAS;JAK2;CBL;ETS1
IL-6 signaling Pathway	8/99	8.08081	2.35368e-06	0	0	12.432	188.15	CDK9;CASP9;GSK3B;STAT3;AKT1;JAK2;MAP3K7;FOXO1
IL-3 Signaling Pathway	8/100	8	2.42334e-06	0	0	12.3077	185.309	CDC42;GSK3B;STAT3;AKT1;KRAS;JAK2;CBL;FOXO1
Central carbon metabolism in cancer	6/64	9.375	1.89868e-05	0	0	14.4231	180.403	PTEN;AKT1;KRAS;HIF1A;EGFR;PDK1
ErbB signaling pathway	7/84	8.33333	6.98782e-06	0	0	12.8205	174.309	GSK3B;CAMK2D;AKT1;KRAS;CBL;ELK1;EGFR
p53 signaling	6/67	8.95522	3.15716e-05	0	0	13.7773	168.605	CASP9;CCND2;CCNE2;PTEN;MDM2;IGF1
Gap junction	7/86	8.13953	8.05189e-06	0	0	12.5224	168.25	GJA1;PDGFB;ADRB1;KRAS;PRKACB;EGFR;ADCY6
Autophagy	9/130	6.92308	1.17105e-06	0	0	10.6509	165.544	IRS1;RHEB;PTEN;AKT1;KRAS;MAP3K7;PRKACB;HIF1A;IGF1R
Colorectal cancer	7/88	7.95455	9.24334e-06	0	0	12.2378	162.517	CASP9;GSK3B;TGFB2;AKT1;KRAS;RHOA;EGFR
cAMP signaling pathway	12/211	5.6872	1.23542e-07	0	0	8.74954	158.576	VAV3;CAMK2D;BDNF;AKT1;ADRB1;SOX9;CALM1;PRKACB;CALM2;RHOA;RAPGEF3;ADCY6
C-type lectin receptor signaling pathway	8/112	7.14286	4.19519e-06	0	0	10.989	155.86	EGR2;MDM2;AKT1;KRAS;CALM1;CALM2;RHOA;NFATC4
Adipocytokine signaling pathway	6/71	8.4507	2.98823e-05	0	0	13.0011	154.685	IRS1;STAT3;AKT1;JAK2;ADIPOR2;PPARGC1A
Adherens junction	6/72	8.33333	3.1513e-05	0	0	12.8205	151.489	CDC42;SNAI1;MAP3K7;RHOA;EGFR;IGF1R
Chemokine signaling pathway	11/190	5.78947	4.29008e-07	0	0	8.90688	150.418	VAV3;CDC42;GSK3B;STAT3;AKT1;CXCR4;KRAS;JAK2;PRKACB;RHOA;ADCY6
IL-9 Signaling Pathway	3/24	12.5	0.00216245	0	0	19.2308	146.502	IRS1;STAT3;AKT1
Wnt Signaling Pathway and Pluripotency	7/97	7.21649	2.31873e-05	0	0	11.1023	140.15	GSK3B;CCND2;FZD4;PRKCE;FZD7;MAP3K7;RHOA
VEGF signaling pathway	5/58	8.62069	0.000136305	0	0	13.2626	135.219	CASP9;CDC42;AKT1;KRAS;VEGFA
T cell receptor signaling pathway	7/101	6.93069	2.1796e-05	0	0	10.6626	131.717	VAV3;CDC42;GSK3B;AKT1;KRAS;MAP3K7;RHOA
Dysregulated miRNA Targeting in Insulin/PI3K-AKT Signaling	3/26	11.5385	0.00268451	0	0	17.7515	130.956	CCND2;RHEB;FASN
Glucagon signaling pathway	7/102	6.86275	2.18218e-05	0	0	10.5581	129.732	CAMK2D;AKT1;CALM1;PRKACB;PPARGC1A;CALM2;FOXO1
Kit Receptor Signaling Pathway	5/67	7.46269	0.000377671	0	0	11.4811	109.031	RASA1;STAT3;AKT1;JAK2;CBL
G Protein Signaling Pathways	6/92	6.52174	0.000183961	0	0	10.0334	104.388	PRKCE;KRAS;CALM1;PRKACB;RHOA;ADCY6
Phospholipase D signaling pathway	8/149	5.36913	2.68142e-05	0	0	8.2602	99.4166	RHEB;PDGFB;AKT1;KRAS;RHOA;RAPGEF3;ADCY6;EGFR
Inflammatory mediator regulation of TRP channels	7/127	5.51181	7.87837e-05	0	0	8.47971	91.9629	CAMK2D;PRKCE;IGF1;CALM1;PRKACB;CALM2;ADCY6
Glycogen Metabolism	3/34	8.82353	0.0055431	0	0	13.5747	89.3416	GSK3B;CALM1;CALM2
Apoptosis	5/81	6.17284	0.000905954	0	0	9.49668	81.6096	CASP9;MDM2;AKT1;IGF1;IGF1R
IL-1 Signaling Pathway	3/37	8.10811	0.0069384	0	0	12.474	79.0167	AKT1;MAP3K7;MYD88
Fc gamma R-mediated phagocytosis	5/87	5.74713	0.000817687	0	0	8.84173	73.0187	VAV3;FCGR1;CDC42;PRKCE;AKT1
Alpha6-Beta4 Integrin Signaling Pathway	4/67	5.97015	0.00389556	0	0	9.18485	63.9008	IRS1;AKT1;RHOA;EGFR
Hippo signaling pathway	7/159	4.40252	0.000292166	0	0	6.7731	63.7299	YAP1;SMAD1;GSK3B;TGFB2;CCND2;FZD4;FZD7
Hedgehog signaling pathway	3/44	6.81818	0.00770801	0	0	10.4895	61.1989	GSK3B;CCND2;PRKACB
Notch Signaling Pathway	3/46	6.52174	0.0116922	0	0	10.0334	57.2638	NOTCH4;HES1;RBPJ
B cell receptor signaling pathway	4/72	5.55556	0.00349562	0	0	8.54701	57.1611	VAV3;GSK3B;AKT1;KRAS
Th17 cell differentiation	5/102	4.90196	0.00162126	0	0	7.54148	56.7358	STAT3;AHR;JAK2;HIF1A;RUNX1
TGF Beta Signaling Pathway	3/52	5.76923	0.0162233	0	0	8.87574	47.5737	SMAD1;STAT3;RUNX2
Calcium signaling pathway	7/189	3.7037	0.000770867	0	0	5.69801	47.5124	CAMK2D;CXCR4;ADRB1;CALM1;PRKACB;CALM2;EGFR
Leukocyte transendothelial migration	5/115	4.34783	0.00266179	0	0	6.68896	46.6826	VAV3;CDC42;CXCR4;RHOA;RAPGEF3
Cell cycle	5/123	4.06504	0.00349708	0	0	6.25391	41.7649	GSK3B;TGFB2;CCND2;CCNE2;MDM2
JAK-STAT signaling pathway	6/164	3.65854	0.00208612	0	0	5.62852	40.7605	CCND2;STAT3;PDGFB;AKT1;JAK2;EGFR
Tight junction	6/167	3.59281	0.00227139	0	0	5.52741	39.5051	CDC42;PRKCE;GATA4;PRKACB;RHOA;RUNX1
Fc epsilon RI signaling pathway	3/68	4.41176	0.0245602	0	0	6.78733	31.3326	VAV3;AKT1;KRAS
Phosphatidylinositol signaling system	3/98	3.06122	0.0622568	0	0	4.70958	17.1713	PTEN;CALM1;CALM2
Toll-like receptor signaling pathway	3/99	3.0303	0.063406	0	0	4.662	16.876	AKT1;MAP3K7;MYD88
			Cutoff = 0.01
